# Supplementary material for: Structural diversity, evolutionary origin, and metabolic engineering of plant specialized benzylisoquinoline alkaloids
Source: Royal Society of Chemistry journal article supplement (doi:10.1039/d4np00029c), 2024-01-01
Supplement: d4np00029c1.pdf [file d4np00029c1.pdf]

## Supplementary information

### Structural diversity, evolutionary origin, and metabolic engineering of plant specialized benzyloisoquinoline alkaloids

Ya Tian<sup>a,b#</sup>, Lingzhe Kong<sup>a,b#</sup>, Qi Li<sup>a,b#</sup>, Yifan Wang<sup>a,b</sup>, Yongmiao Wang<sup>a,b</sup>, Zhoujie An<sup>a,b</sup>, Yuwei Ma<sup>a,b</sup>, Lixia Tian<sup>c</sup>, Baozhong Duan<sup>d</sup>, Wei Sun<sup>e</sup>, Ranran Gao<sup>f\*</sup>, Shilin Chen<sup>g\*</sup>, Zhichao Xu<sup>a,b\*</sup>

<sup>a</sup> Key Laboratory of Saline-alkali Vegetation Ecology Restoration (Northeast Forestry University), Ministry of Education, Harbin 150040, China

<sup>b</sup> College of Life Science, Northeast Forestry University, Harbin, 150040, China

<sup>c</sup> School of Pharmaceutical Sciences, Guizhou University, Guiyang, 550025, China

<sup>d</sup> College of Pharmaceutical Science, Dali University, Dali 671003, China

<sup>e</sup> Key Laboratory of Beijing for Identification and Safety Evaluation of Chinese Medicine, Institute of Chinese Materia Medica, China Academy of Chinese Medical Sciences, Beijing 100700, China

<sup>f</sup> Artemisinin Research Center, Institute of Chinese Materia Medica, China Academy of Chinese Medical Sciences, Beijing, 100700, China

<sup>g</sup> Institute of Herbgonomics, Chengdu University of Traditional Chinese Medicine, Chengdu 611137, China

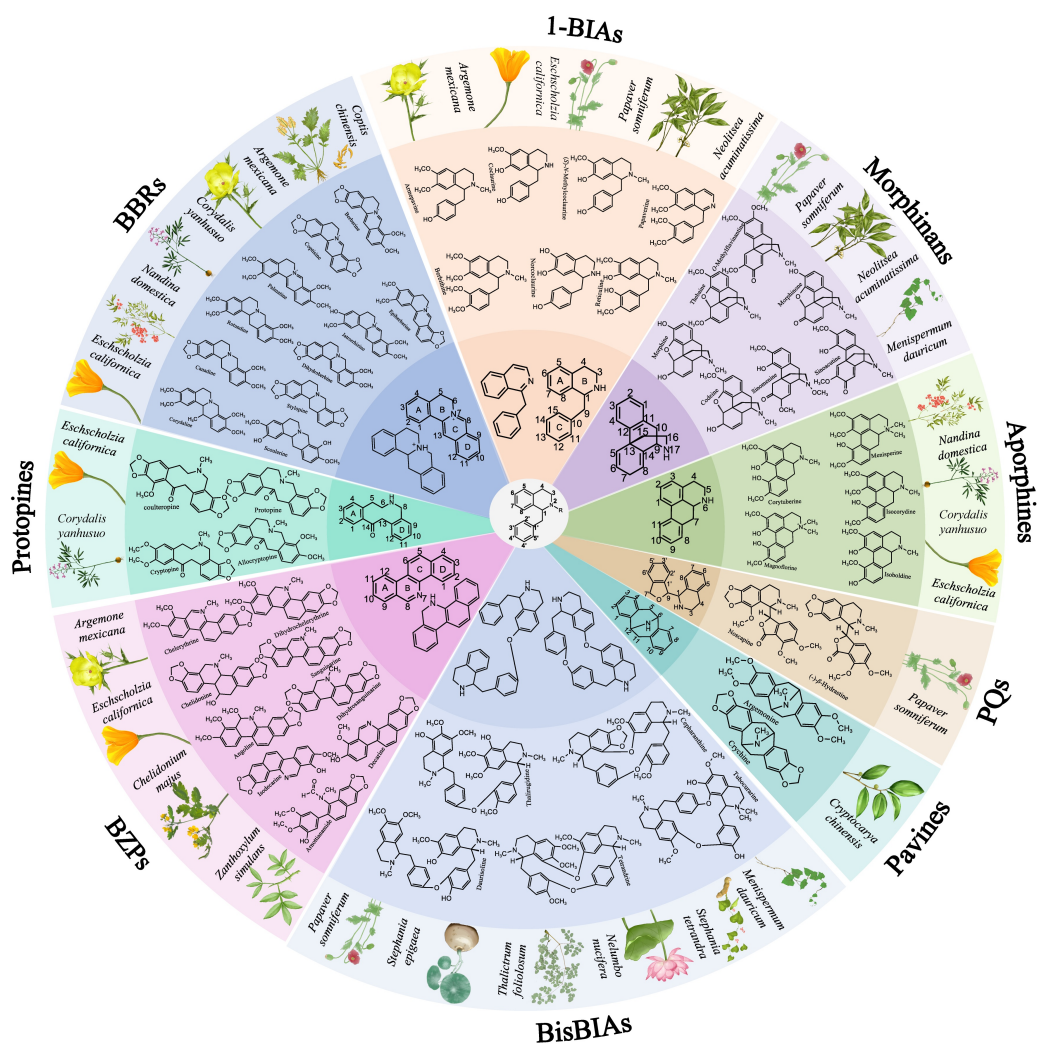

**Supplementary Figure 1. The main classification and structure of BIAs.** 1-benzylisoquinoline alkaloids (1-BIAs), bisbenzylisoquinoline alkaloids (bisBIAs), morphinan alkaloids (Morphinans), aporphine alkaloids (Aporphines), protoberberine alkaloids (BBRs), phthalideisoquinoline alkaloids (PQs), benzo[c]phenanthridine alkaloids (BZPs), protopine alkaloids (Protopines), and pavine alkaloids (Pavines).

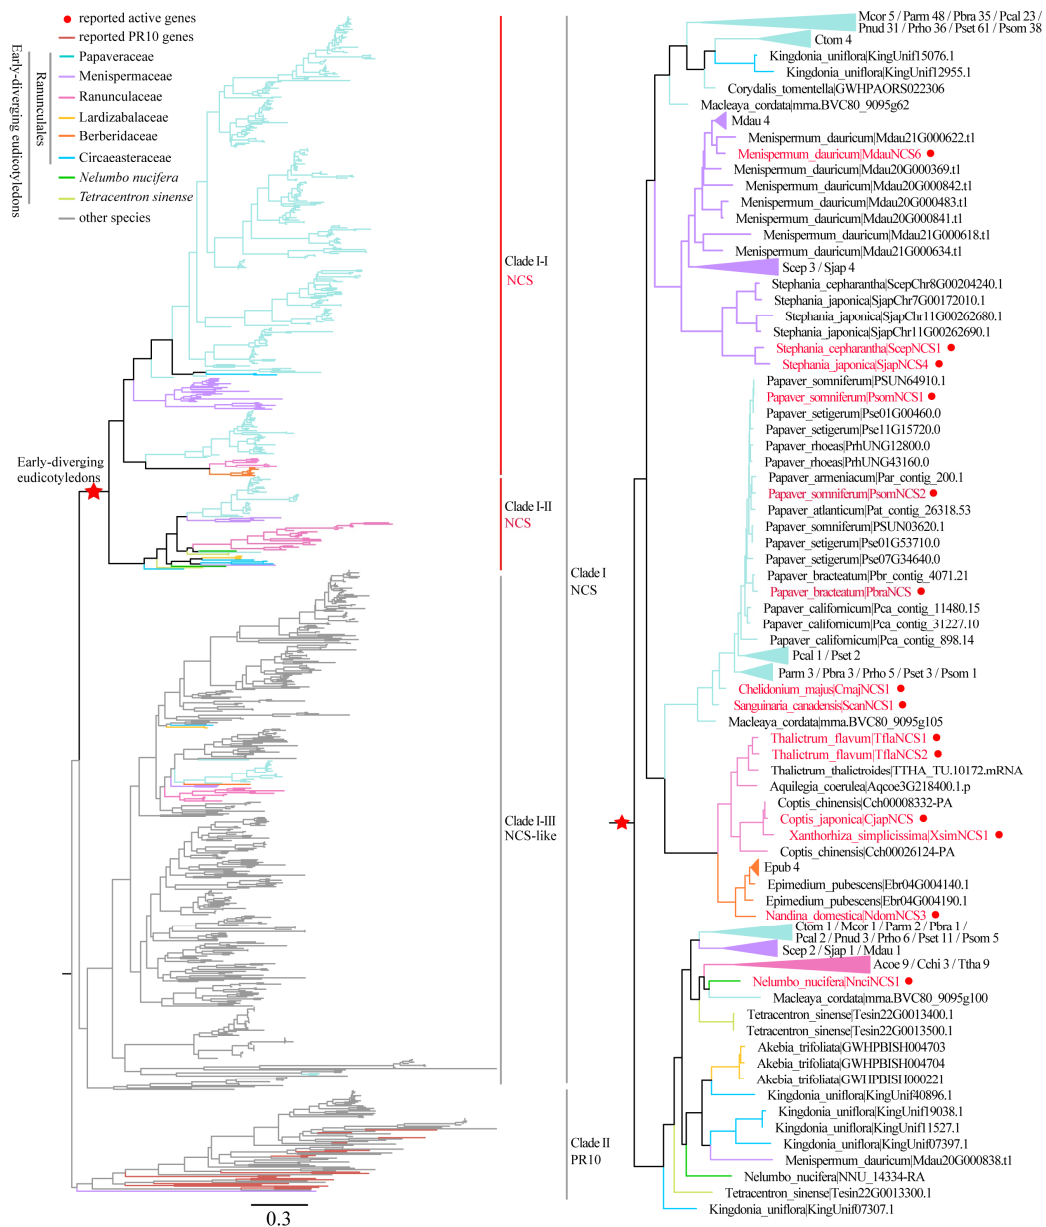

**Supplementary Figure 2. Phylogenetic relationships of the homologous genes of NCS from candidate 245 species.** The species abbreviation consists of the first letter of the genus name and the first three letters of the species name, such as *Aquilegia coerulea* (Acoe), *Thalictrum thalichroides* (Ttha), *Coptis chinensis* (Cchi), and *Papaver setigerum* (Pset). Accession numbers are listed in Supplementary Table 4, and gene sequences of NCS are presented in Supplementary Table 6.

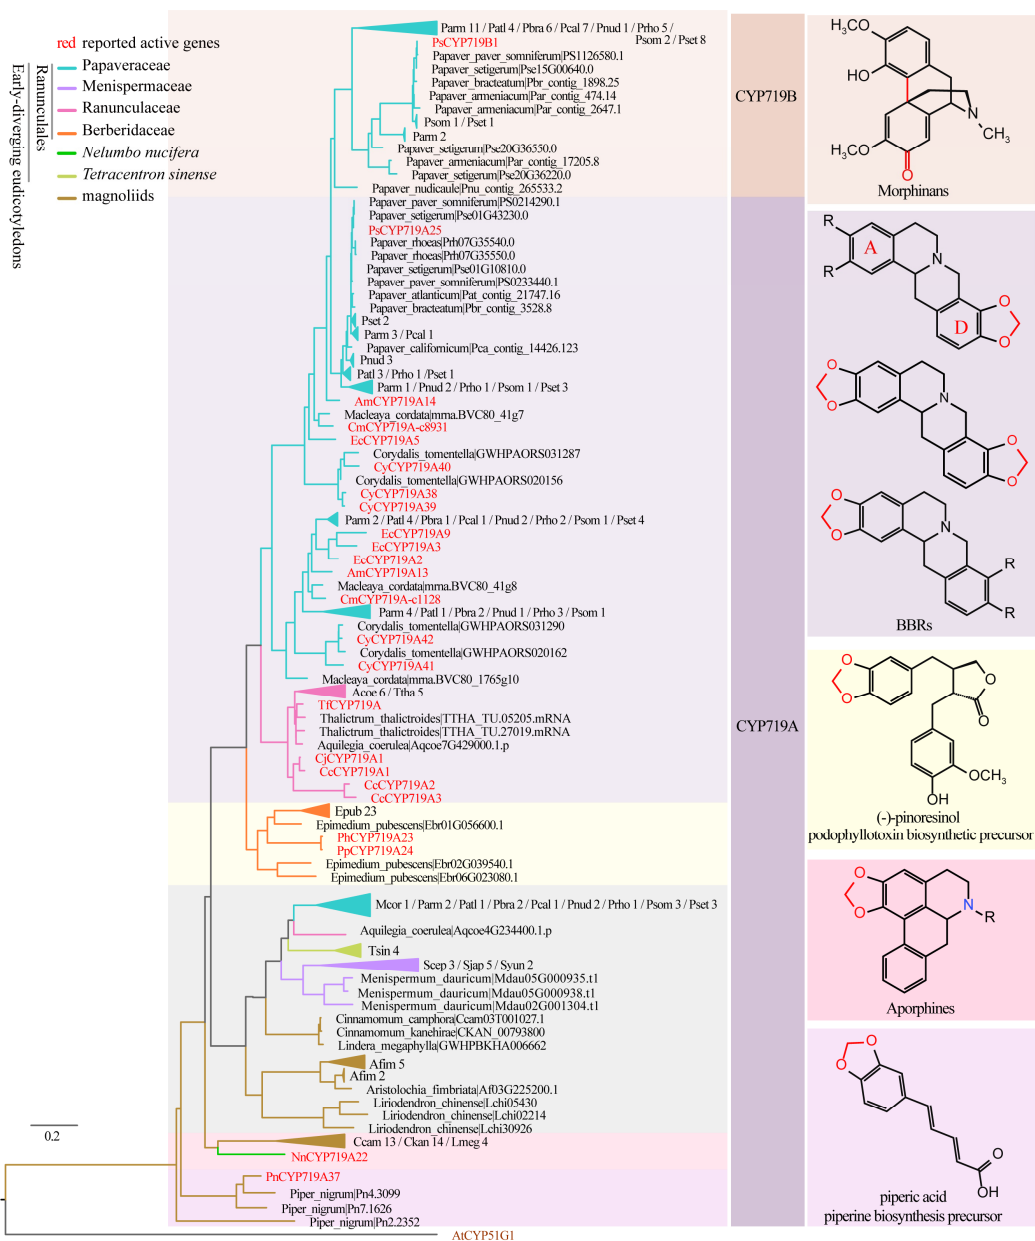

**Supplementary Figure 3. Phylogenetic tree of CYP719 family members from candidate 245 species.** Accession numbers are listed in Supplementary Table 4, and gene sequences of CYP719 are presented in Supplementary Table 7.



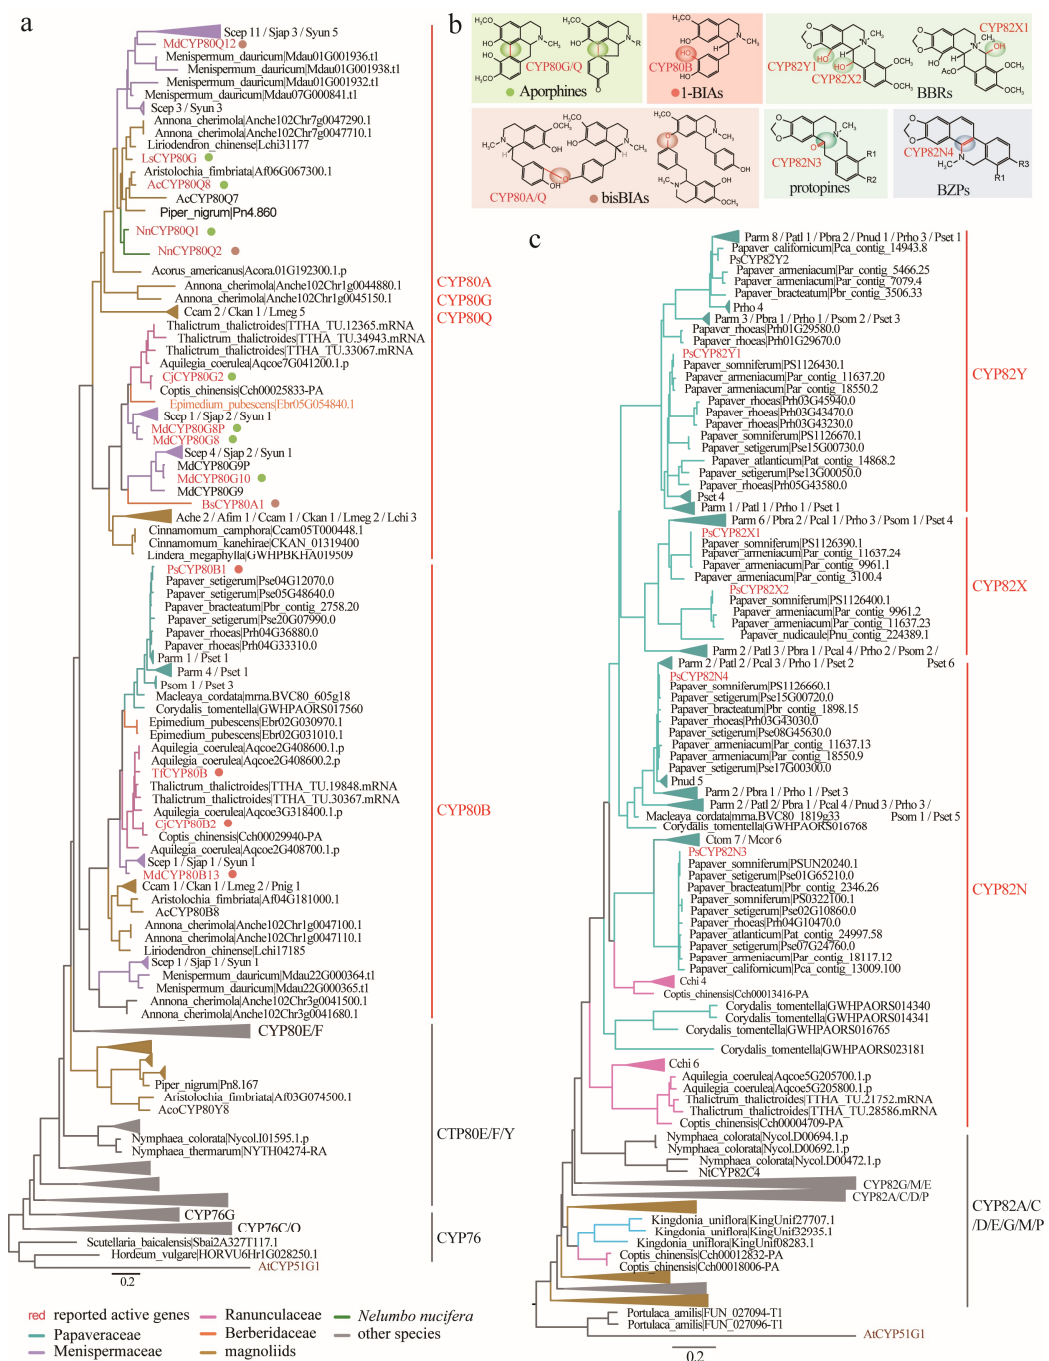

**Supplementary Figure 4. Phylogenetic tree of CYP80 and CYP82 family homologous genes in 245 species, respectively.** (a) Phylogenetic relationships of the homologous genes of CYP80A/B/G. (b) The CYP80A/B/G/Q subfamily and the CYP82N/X/Y subfamily are involved in various types of catalytic reactions. (c) Phylogenetic relationships of the homologous genes of CYP82X/Y/N. Accession numbers are listed in Supplementary Table 4, and homologous gene sequences of CYP80 and CYP82 are listed in Supplementary Tables 8 and 9, respectively.

Supplementary Table 1. The structural diversity and classifications of natural BIAs.

| 1-BIAs                                                              |                                                                                   |                  |                  |    |   |                                                                                      |                  |                                                                                      |                    |
|---------------------------------------------------------------------|-----------------------------------------------------------------------------------|------------------|------------------|----|---|--------------------------------------------------------------------------------------|------------------|--------------------------------------------------------------------------------------|--------------------|
| Name                                                                | 2                                                                                 | 6                | 7                | 8  | 9 | 12                                                                                   | 13               | 14                                                                                   | 15                 |
| norcoclaurine                                                       |                                                                                   | OH               | OH               |    |   |                                                                                      | OH               |                                                                                      |                    |
| armepavine                                                          | CH <sub>3</sub>                                                                   | OCH <sub>3</sub> | OCH <sub>3</sub> |    |   |                                                                                      | OH               | H                                                                                    |                    |
| coclaurine                                                          | H                                                                                 | OCH <sub>3</sub> | OH               |    |   |                                                                                      | OH               | H                                                                                    |                    |
| laudanoline                                                         | CH <sub>3</sub>                                                                   | OCH <sub>3</sub> | OCH <sub>3</sub> |    |   |                                                                                      | OCH <sub>3</sub> | OCH <sub>3</sub>                                                                     |                    |
| laudanosine                                                         | CH <sub>3</sub>                                                                   | OH               | OH               |    |   |                                                                                      | OCH <sub>3</sub> | OCH <sub>3</sub>                                                                     |                    |
| magnocurarine                                                       | (CH <sub>3</sub> ) <sub>2</sub>                                                   | OH               | OH               |    |   |                                                                                      | OH               | H                                                                                    |                    |
| norjuziphine                                                        | H                                                                                 | H                | OCH <sub>3</sub> | OH |   |                                                                                      | OH               | H                                                                                    |                    |
| reticuline                                                          | CH <sub>3</sub>                                                                   | OCH <sub>3</sub> | OH               |    |   |                                                                                      | OCH <sub>3</sub> | OH                                                                                   |                    |
| reticuline <i>N</i> -oxide                                          |  | OCH <sub>3</sub> | OH               |    |   |                                                                                      | OCH <sub>3</sub> | OH                                                                                   |                    |
| (1 <i>S</i> )-5'- <i>O</i> - <i>p</i> -Hydroxybenzoyl norreticuline | H                                                                                 | OCH <sub>3</sub> | OH               |    |   |                                                                                      | OCH <sub>3</sub> |  |                    |
| (+)- <i>N</i> -methylisococlaurine                                  | CH <sub>3</sub>                                                                   | OH               | OCH <sub>3</sub> |    |   |                                                                                      | OH               | H                                                                                    |                    |
| (1' <i>S</i> )-12'-hydroxyl-linderegatine                           | H                                                                                 | OCH <sub>3</sub> | OH               |    |   |  | OH               | H                                                                                    |                    |
| (1 <i>R</i> , 1' <i>R</i> )-11,11'-biscoclaurine                    | H                                                                                 | OCH <sub>3</sub> | OH               |    |   |  | OH               | H                                                                                    |                    |
| (-)- <i>N</i> -methylcoclaurine                                     | CH <sub>3</sub>                                                                   | OCH <sub>3</sub> | OH               |    |   |                                                                                      | OH               | H                                                                                    |                    |
| (+)-argenaxine                                                      | H                                                                                 | -O-O-            |                  |    |   |                                                                                      | OCH <sub>3</sub> | OCH <sub>3</sub>                                                                     | CH <sub>2</sub> OH |
| (+)-higenamine (demethylcoclaurine)                                 | H                                                                                 | OH               | OH               |    |   |                                                                                      | OH               | H                                                                                    |                    |
| (+)-laudanine                                                       | CH <sub>3</sub>                                                                   | OCH <sub>3</sub> | OCH <sub>3</sub> |    |   | OH                                                                                   | OCH <sub>3</sub> | OH                                                                                   |                    |
| juziphine                                                           | CH <sub>3</sub>                                                                   |                  | OCH <sub>3</sub> | OH |   |                                                                                      | OH               |                                                                                      |                    |
| norreticuline                                                       | CH <sub>3</sub>                                                                   | OCH <sub>3</sub> | OH               |    |   |                                                                                      | OCH <sub>3</sub> | OH                                                                                   |                    |
| magnococline                                                        |                                                                                   |                  | OCH <sub>3</sub> | OH |   |                                                                                      | OCH <sub>3</sub> |                                                                                      |                    |
| norarmepavine                                                       |                                                                                   | OCH <sub>3</sub> | OCH <sub>3</sub> |    |   |                                                                                      | OH               |                                                                                      |                    |
| <i>O,O</i> -dimethylcoclaurine                                      |                                                                                   | OCH <sub>3</sub> | OCH <sub>3</sub> |    |   |                                                                                      | OCH <sub>3</sub> |                                                                                      |                    |
| oblongine                                                           | (CH <sub>3</sub> ) <sub>2</sub>                                                   |                  | OCH <sub>3</sub> | OH |   |                                                                                      | OH               |                                                                                      |                    |
| tembetarine                                                         | (CH <sub>3</sub> ) <sub>2</sub>                                                   | OCH <sub>3</sub> | OH               |    |   |                                                                                      | OCH <sub>3</sub> | OH                                                                                   |                    |
| <i>O</i> -methylarmepavine                                          | CH <sub>3</sub>                                                                   | OCH <sub>3</sub> | OCH <sub>3</sub> |    |   |                                                                                      | OCH <sub>3</sub> |                                                                                      |                    |
| <i>N,O</i> -dimethylcoclaurine                                      | CH <sub>3</sub>                                                                   | OCH <sub>3</sub> | OH               |    |   |                                                                                      | OCH <sub>3</sub> |                                                                                      |                    |
| pseudolaudanine                                                     | CH <sub>3</sub>                                                                   | OH               | OCH <sub>3</sub> |    |   |                                                                                      | OCH <sub>3</sub> | OCH <sub>3</sub>                                                                     |                    |

|                 |                 |       |                  |                                 |  |                  |                  |  |                                                                                     |
|-----------------|-----------------|-------|------------------|---------------------------------|--|------------------|------------------|--|-------------------------------------------------------------------------------------|
| berbervirine    | CH <sub>3</sub> | -O-O- |                  | =O                              |  | OCH <sub>3</sub> | OCH <sub>3</sub> |  |  |
| protosinomenine | CH <sub>3</sub> | OH    | OCH <sub>3</sub> |                                 |  | OCH <sub>3</sub> | OH               |  |                                                                                     |
| lotusine        |                 | OH    | OCH <sub>3</sub> | (CH <sub>3</sub> ) <sub>2</sub> |  |                  | OH               |  |                                                                                     |

Type 2

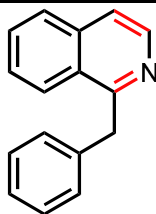

| Name                     | 5 | 6                | 7                | 9  | 11                     | 12               | 13               | 14               | 15                                                                                  |
|--------------------------|---|------------------|------------------|----|------------------------|------------------|------------------|------------------|-------------------------------------------------------------------------------------|
| neoliticumonine          | H | -O-O-            |                  |    |                        |                  | H                | OH               |                                                                                     |
| berbithine               | H | -O-O-            |                  |    | OH                     | OCH <sub>3</sub> | OCH <sub>3</sub> | H                |                                                                                     |
| araglaucine              | H | -O-O-            |                  | =O | COOC<br>H <sub>3</sub> | H                |                  | -O-O-            |                                                                                     |
| papaverine               |   | OCH <sub>3</sub> | OCH <sub>3</sub> |    |                        |                  | OCH <sub>3</sub> | OCH <sub>3</sub> |                                                                                     |
| fumaflorine              | H | OCH <sub>3</sub> | OCH <sub>3</sub> | =O | COOH                   |                  | -O-O-            | H                |  |
| fumaflorine methyl ester | H | OCH <sub>3</sub> | OCH <sub>3</sub> | =O | COOH                   |                  | -O-O-            | H                |                                                                                     |
| rugosinone               |   | -O-O-            |                  | =O |                        | OCH <sub>3</sub> | OCH <sub>3</sub> |                  | OH                                                                                  |

Type 3

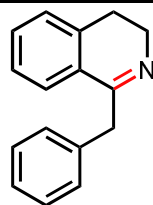

| Name              | 5 | 6                | 7                | 9  | 11 | 12               | 13               | 14 |
|-------------------|---|------------------|------------------|----|----|------------------|------------------|----|
| coptisine A       | H | OCH <sub>3</sub> | OH               | =O | OH | OCH <sub>3</sub> | OCH <sub>3</sub> | H  |
| coptisine B       | H | OCH <sub>3</sub> | OCH <sub>3</sub> | =O | OH |                  | -O-O-            | H  |
| coptisine C       | H |                  | -O-O-            | =O | OH |                  | -O-O-            | H  |
| dihydrotaxilamine | H | OH               | OH               | =O | OH | OCH <sub>3</sub> | OCH <sub>3</sub> | H  |
| dehydroreticuline | H | OCH <sub>3</sub> | OH               |    |    | OH               | OCH <sub>3</sub> | H  |

### Morphinans

Type 1

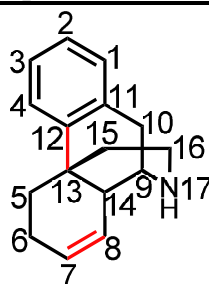

| Name             | 2 | 3                  | 4   | 5 | 6                  | 7                | 8                | 17              |
|------------------|---|--------------------|-----|---|--------------------|------------------|------------------|-----------------|
| morphine         |   | OH                 | -O- |   | OH                 |                  |                  | CH <sub>3</sub> |
| codeine          |   | OCH <sub>3</sub>   | -O- |   | OH                 |                  |                  | CH <sub>3</sub> |
| heroin           |   | OCOCH <sub>3</sub> | -O- |   | OCOCH <sub>3</sub> |                  |                  | CH <sub>3</sub> |
| sinomenine       |   | OCH <sub>3</sub>   | OH  |   | =O                 | OCH <sub>3</sub> |                  | CH <sub>3</sub> |
| 14-episinomenine |   | OCH <sub>3</sub>   | OH  |   | =O                 | OCH <sub>3</sub> |                  | CH <sub>3</sub> |
| cephamuline      |   | OCH <sub>3</sub>   | OH  |   | =O                 | OCH <sub>3</sub> | OCH <sub>3</sub> | CH <sub>3</sub> |

|                        |                  |                  |    |    |                  |                  |                 |
|------------------------|------------------|------------------|----|----|------------------|------------------|-----------------|
| 8-demethoxycephatonine | OH               | OCH <sub>3</sub> |    | =O | OCH <sub>3</sub> |                  | CH <sub>3</sub> |
| cephamonine            |                  | OCH <sub>3</sub> | OH | =O | OCH <sub>3</sub> | OCH <sub>3</sub> | CH <sub>3</sub> |
| tannagine              | OCH <sub>3</sub> | OCH <sub>3</sub> |    | =O | OCH <sub>3</sub> | OCH <sub>3</sub> | CH <sub>3</sub> |
| 8-demethoxyrunanine    | OCH <sub>3</sub> | OCH <sub>3</sub> |    | =O | OCH <sub>3</sub> |                  | CH <sub>3</sub> |

Type 2

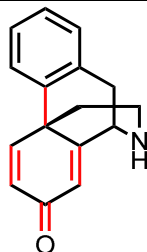

| Name                             | 2                | 3                | 4  | 5 | 6                | 7 | 8 | 17              |
|----------------------------------|------------------|------------------|----|---|------------------|---|---|-----------------|
| sinoacutine                      |                  | OCH <sub>3</sub> | OH |   | OCH <sub>3</sub> |   |   | CH <sub>3</sub> |
| salutaridine                     |                  | OCH <sub>3</sub> | OH |   | OCH <sub>3</sub> |   |   | CH <sub>3</sub> |
| (-)- <i>O</i> -methylflavinatine | OMe              | OMe              | H  |   | OMe              |   |   | Me              |
| sebiferine                       | OCH <sub>3</sub> | OCH <sub>3</sub> | H  |   | OCH <sub>3</sub> |   |   | CH <sub>3</sub> |
| pallidine                        | OH               | OCH <sub>3</sub> | H  |   | OCH <sub>3</sub> |   |   | CH <sub>3</sub> |
| <i>O</i> -methylflavinantine     | OCH <sub>3</sub> | OCH <sub>3</sub> | H  |   | OCH <sub>3</sub> |   |   | CH <sub>3</sub> |
| flavinantine                     | OCH <sub>3</sub> | OH               | H  |   | OCH <sub>3</sub> |   |   | CH <sub>3</sub> |
| pallidine                        | OH               | OCH <sub>3</sub> | H  |   | OCH <sub>3</sub> |   |   | CH <sub>3</sub> |

Type 3

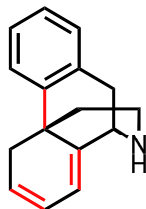

| Name        | 1                | 3                | 4   | 5 | 6                | 8 | 10 | 17              |
|-------------|------------------|------------------|-----|---|------------------|---|----|-----------------|
| thebaine    |                  | OCH <sub>3</sub> | -O- |   | OCH <sub>3</sub> |   |    | CH <sub>3</sub> |
| gindarudine | OCH <sub>3</sub> | OH               | -O- |   | OH               |   | OH |                 |

Type 4

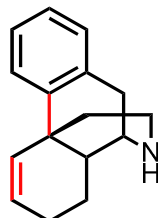

| Name     | 3                | 4  | 5 | 6                | 7  | 8 | 10 | 17              |
|----------|------------------|----|---|------------------|----|---|----|-----------------|
| milonine | OCH <sub>3</sub> | OH |   | OCH <sub>3</sub> | =O |   |    | CH <sub>3</sub> |

Type 5

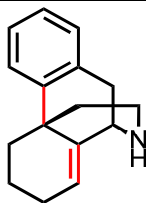

| Name        | 3                | 4  | 5 | 6                   | 7                   | 8                | 10 | 17              |
|-------------|------------------|----|---|---------------------|---------------------|------------------|----|-----------------|
| FK-3000     | OCH <sub>3</sub> | OH |   | CH <sub>3</sub> COO | CH <sub>3</sub> COO | OCH <sub>3</sub> |    | H               |
| cephakicine | OCH <sub>3</sub> | OH |   | CH <sub>3</sub> COO | CH <sub>3</sub> COO | OCH <sub>3</sub> |    | CH <sub>3</sub> |

Type 6

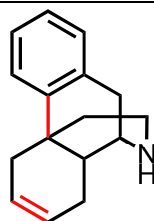

| Name        | 3                | 4   | 5 | 6                | 7                | 8  | 10 | 17              |
|-------------|------------------|-----|---|------------------|------------------|----|----|-----------------|
| cephasamine | OCH <sub>3</sub> | -O- |   | OCH <sub>3</sub> | OCH <sub>3</sub> | =O |    | CH <sub>3</sub> |

Type 7

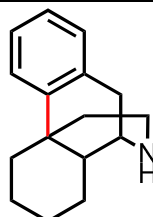

| Name                                | 3                | 4  | 5 | 6  | 7                | 8 | 10 | 17              |
|-------------------------------------|------------------|----|---|----|------------------|---|----|-----------------|
| 7( <i>R</i> )-7,8-dihydrosinomenine | OCH <sub>3</sub> | OH |   | =O | OCH <sub>3</sub> |   |    | CH <sub>3</sub> |

## Aporphines

Type 1

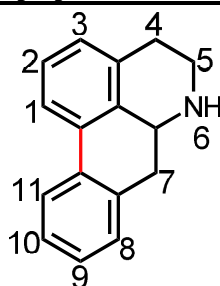

| Name                                  | 1                | 2                | 3                | 4 | 5 | 6                               | 7                               | 8 | 9                | 10               | 11               |
|---------------------------------------|------------------|------------------|------------------|---|---|---------------------------------|---------------------------------|---|------------------|------------------|------------------|
| anonaine                              |                  | -O-O-            |                  |   |   | H                               |                                 |   | H                | H                | H                |
| actinodaphnine                        |                  | -O-O-            |                  |   |   | H                               |                                 |   | OH               | OCH <sub>3</sub> | H                |
| annonamine                            | OCH <sub>3</sub> | OH               |                  |   |   | (CH <sub>3</sub> ) <sub>2</sub> |                                 |   | H                | H                | H                |
| anolobine                             |                  | -O-O-            |                  |   |   | H                               |                                 |   | OH               | H                | H                |
| apomorphine                           | H                | H                |                  |   |   | CH <sub>3</sub>                 |                                 |   | H                | OH               | OH               |
| asimilobine                           | OCH <sub>3</sub> | OH               |                  |   |   | H                               |                                 |   | H                | H                | H                |
| boldine                               | OCH <sub>3</sub> | OH               |                  |   |   | CH <sub>3</sub>                 |                                 |   | OH               | OCH <sub>3</sub> | H                |
| boldine <i>N</i> -oxide               | OCH <sub>3</sub> | OH               |                  |   |   |                                 |                                 |   | OH               | OCH <sub>3</sub> | H                |
| (+)-bulbocapnine                      |                  | -O-O-            |                  |   |   | CH <sub>3</sub>                 |                                 |   | H                | OCH <sub>3</sub> | OH               |
| (-)-caaverine                         | OH               | OCH <sub>3</sub> |                  |   |   | H                               |                                 |   | H                | H                | H                |
| cassythine                            |                  | -O-O-            | OCH <sub>3</sub> |   |   | H                               |                                 |   | OH               | OCH <sub>3</sub> | H                |
| (+)-corydine                          | OH               | OCH <sub>3</sub> |                  |   |   | CH <sub>3</sub>                 |                                 |   | H                | OCH <sub>3</sub> | OCH <sub>3</sub> |
| corytuberine                          | OH               | OCH <sub>3</sub> |                  |   |   | CH <sub>3</sub>                 |                                 |   | H                | OCH <sub>3</sub> | OH               |
| dicentrine                            |                  | -O-O-            |                  |   |   | CH <sub>3</sub>                 |                                 |   | OH               | OCH <sub>3</sub> | H                |
| dicentrine- $\beta$ - <i>N</i> -oxide |                  | -O-O-            |                  |   |   |                                 |                                 |   | OCH <sub>3</sub> | OCH <sub>3</sub> | H                |
| ( <i>R</i> )-dihydroguatteriscine     | OCH <sub>3</sub> | OCH <sub>3</sub> | OCH <sub>3</sub> |   |   | H                               | (CH <sub>3</sub> ) <sub>2</sub> |   | H                | H                | H                |
| glaucine                              | OCH <sub>3</sub> | OCH <sub>3</sub> |                  |   |   | CH <sub>3</sub>                 |                                 |   | OCH <sub>3</sub> | OCH <sub>3</sub> | H                |
| hernagine                             | OCH <sub>3</sub> | OCH <sub>3</sub> |                  |   |   | H                               |                                 |   | H                | OH               | OCH <sub>3</sub> |
| (+)-isoboldine                        | OH               | OCH <sub>3</sub> |                  |   |   | CH <sub>3</sub>                 |                                 |   | OH               | OCH <sub>3</sub> | H                |

|                                                |                  |                                                                                   |                                                                                     |                  |                  |                  |
|------------------------------------------------|------------------|-----------------------------------------------------------------------------------|-------------------------------------------------------------------------------------|------------------|------------------|------------------|
| isocoridyne                                    | OCH <sub>3</sub> | OCH <sub>3</sub>                                                                  | CH <sub>3</sub>                                                                     | H                | OCH <sub>3</sub> | OH               |
| isocorytuberine                                | OH               | OCH <sub>3</sub>                                                                  | CH <sub>3</sub>                                                                     | H                | OH               | OCH <sub>3</sub> |
| isodomeesticine                                | OCH <sub>3</sub> | OH                                                                                | CH <sub>3</sub>                                                                     | -O-O-            |                  | H                |
| laetanine                                      | OCH <sub>3</sub> | OH                                                                                | H                                                                                   | OCH <sub>3</sub> | OH               | H                |
| (+)-laurotetanine                              | OCH <sub>3</sub> | OCH <sub>3</sub>                                                                  | H                                                                                   | OH               | OCH <sub>3</sub> | H                |
| laurolitsine                                   | OCH <sub>3</sub> | OH                                                                                | H                                                                                   | OH               | OCH <sub>3</sub> | OH               |
| magnoflorine                                   | OH               | OCH <sub>3</sub>                                                                  | (CH <sub>3</sub> ) <sub>2</sub>                                                     | H                | OCH <sub>3</sub> | H                |
| nantenine                                      | OCH <sub>3</sub> | OCH <sub>3</sub>                                                                  | CH <sub>3</sub>                                                                     | -O-O-            |                  | H                |
| neolitsine                                     | -O-O-            |                                                                                   | CH <sub>3</sub>                                                                     | -O-O-            |                  | H                |
| <i>N</i> -cyanomethylnorboldine                | OCH <sub>3</sub> | OH                                                                                |    | OH               | OCH <sub>3</sub> | H                |
| <i>N,O</i> -diacetylnoroliveroline             | -O-O-            |                                                                                   |   | H                | H                | H                |
| <i>N,O</i> -diacetyl(-)-nornuciferidine        | OCH <sub>3</sub> | OCH <sub>3</sub>                                                                  |   | H                | H                | H                |
| tinoscorside A                                 | OCH <sub>3</sub> |  | OCH <sub>3</sub>                                                                    | H                | H                | H                |
| <i>N</i> -methylboldinium                      | OCH <sub>3</sub> | OH                                                                                | (CH <sub>3</sub> ) <sub>2</sub>                                                     | OH               | OCH <sub>3</sub> | H                |
| <i>N</i> -methylglaucinium                     | OCH <sub>3</sub> | OCH <sub>3</sub>                                                                  | (CH <sub>3</sub> ) <sub>2</sub>                                                     | OCH <sub>3</sub> | OCH <sub>3</sub> | H                |
| <i>N</i> -methylhernagine                      | OCH <sub>3</sub> | OCH <sub>3</sub>                                                                  | CH <sub>3</sub>                                                                     | H                | OH               | OCH <sub>3</sub> |
| <i>N</i> -methylhernovine                      | OCH <sub>3</sub> | OH                                                                                | CH <sub>3</sub>                                                                     | H                | OH               | OCH <sub>3</sub> |
| <i>N</i> -methylisodomeesticine                | OCH <sub>3</sub> | OH                                                                                | (CH <sub>3</sub> ) <sub>2</sub>                                                     | -O-O-            |                  | H                |
| <i>N</i> -methyl-laurotetanine                 | OCH <sub>3</sub> | OCH <sub>3</sub>                                                                  | CH <sub>3</sub>                                                                     | OH               | OCH <sub>3</sub> | H                |
| <i>N</i> -methyl-laurotetanine <i>n</i> -oxide | OCH <sub>3</sub> | OCH <sub>3</sub>                                                                  |  | OH               | OCH <sub>3</sub> | H                |
| <i>N</i> -methyl-lindcarpine                   | OCH <sub>3</sub> | OH                                                                                | CH <sub>3</sub>                                                                     | H                | OCH <sub>3</sub> | OH               |
| <i>N</i> -methyl nantenine                     | OCH <sub>3</sub> | OCH <sub>3</sub>                                                                  | (CH <sub>3</sub> ) <sub>2</sub>                                                     | -O-O-            |                  | H                |
| <i>N</i> -methylpredicentrine                  | OCH <sub>3</sub> | OH                                                                                | (CH <sub>3</sub> ) <sub>2</sub>                                                     | OCH <sub>3</sub> | OCH <sub>3</sub> | H                |
| (-)- <i>N</i> -methylasimilobine               | OCH <sub>3</sub> | OH                                                                                | CH <sub>3</sub>                                                                     | H                | H                | H                |
| <i>N</i> -methyl-1,2,10-trimethoxyaporphine    | OCH <sub>3</sub> | OCH <sub>3</sub>                                                                  | CH <sub>3</sub>                                                                     | H                | OCH <sub>3</sub> | H                |
| <i>N</i> -nitrosoanonaine                      | -O-O-            |                                                                                   |  | H                | H                | H                |
| <i>N</i> -nitrosoxylophine                     | -O-O-            |                                                                                   |  | OCH <sub>3</sub> | H                | H                |
| norboldine                                     | OCH <sub>3</sub> | OH                                                                                | H                                                                                   | OH               | OCH <sub>3</sub> | H                |
| (+)-norboldine                                 | OCH <sub>3</sub> | OH                                                                                | H                                                                                   | OH               | OCH <sub>3</sub> | H                |
| ( <i>S</i> )-norcorydine                       | OH               | OCH <sub>3</sub>                                                                  | H                                                                                   | H                | OCH <sub>3</sub> | OCH <sub>3</sub> |
| (+)-norglaucine                                | OCH <sub>3</sub> | OCH <sub>3</sub>                                                                  | H                                                                                   | OCH <sub>3</sub> | OCH <sub>3</sub> | H                |
| (+)-norisocorydine                             | OCH <sub>3</sub> | OCH <sub>3</sub>                                                                  | H                                                                                   | H                | OCH <sub>3</sub> | OH               |
| norisocorydine                                 | OCH <sub>3</sub> | OCH <sub>3</sub>                                                                  | H                                                                                   | H                | OCH <sub>3</sub> | OH               |
| nornuciferine                                  | OCH <sub>3</sub> | OCH <sub>3</sub>                                                                  | -                                                                                   | H                | H                | H                |
| (+)-norocoxylonine                             | -O-O-            |                                                                                   | H                                                                                   | OH               | OCH <sub>3</sub> | OCH <sub>3</sub> |
| noroliveroline                                 | -O-O-            |                                                                                   | H                                                                                   | OH,<br>H         | H                | H                |
| norushinsunine                                 | -O-O-            |                                                                                   | H                                                                                   | OH               | H                | H                |
| nuciferine                                     | -O-O-            |                                                                                   | CH <sub>3</sub>                                                                     | H                | H                | H                |
| oliveroline- $\beta$ - <i>N</i> -oxide         | -O-O-            |                                                                                   | CH <sub>3</sub> ,<br>O                                                              | OH,<br>H         | H                | H                |
| <i>O</i> -methylbulbocapnine                   | -O-O-            |                                                                                   | CH <sub>3</sub>                                                                     | H                | OCH <sub>3</sub> | OCH <sub>3</sub> |
| (-)- <i>O</i> -methylisopiline                 | OCH <sub>3</sub> | OCH <sub>3</sub>                                                                  | OCH <sub>3</sub>                                                                    | H                | H                | H                |
| roemerine                                      | -O-O-            |                                                                                   | CH <sub>3</sub>                                                                     | H                | H                | H                |
| ( <i>S</i> )-dicentrine                        | -O-O-            |                                                                                   | CH <sub>3</sub>                                                                     | OCH <sub>3</sub> | OCH <sub>3</sub> | H                |

|                                                                                  |                  |                                                                                     |                  |    |                                                                                     |                                                                                       |                                                                                       |                  |                  |
|----------------------------------------------------------------------------------|------------------|-------------------------------------------------------------------------------------|------------------|----|-------------------------------------------------------------------------------------|---------------------------------------------------------------------------------------|---------------------------------------------------------------------------------------|------------------|------------------|
| semiimmersumine A                                                                | OCH <sub>3</sub> | OCH <sub>3</sub>                                                                    |                  |    |    |                                                                                       | H                                                                                     | H                | H                |
| semiimmersumine B                                                                |                  | -O-O-                                                                               |                  |    |    | OH                                                                                    | H                                                                                     | H                | H                |
| ( <i>S</i> )-neolitsine                                                          |                  | -O-O-                                                                               |                  |    | CH <sub>3</sub>                                                                     | OH                                                                                    |                                                                                       | -O-O-            | H                |
| (+)-( <i>S</i> )- <i>N</i> -acetylaaverine                                       | OH               | OCH <sub>3</sub>                                                                    |                  |    |    |                                                                                       | H                                                                                     | H                | H                |
| (+)-( <i>S</i> )- <i>N</i> -butyrylaaverine                                      | OH               | OCH <sub>3</sub>                                                                    |                  |    |    |                                                                                       | H                                                                                     | H                | H                |
| (+)-( <i>S</i> )- <i>N</i> -propionylaaverine                                    | OH               | OCH <sub>3</sub>                                                                    |                  |    |    |                                                                                       | H                                                                                     | H                | H                |
| stephanine                                                                       |                  | -O-O-                                                                               |                  |    | CH <sub>3</sub>                                                                     | OCH <sub>3</sub>                                                                      | H                                                                                     | H                | H                |
| tavoyanine A                                                                     | OCH <sub>3</sub> | OH                                                                                  |                  |    |    |                                                                                       | OH                                                                                    | OCH <sub>3</sub> | H                |
| thaliadine                                                                       | OCH <sub>3</sub> | OCH <sub>3</sub>                                                                    | OCH <sub>3</sub> |    | CH <sub>3</sub>                                                                     |                                                                                       |    | OCH <sub>3</sub> | H                |
| tuduranine                                                                       | OCH <sub>3</sub> | OCH <sub>3</sub>                                                                    |                  |    | H                                                                                   |                                                                                       | H                                                                                     | OH               | H                |
| xanthoplanine                                                                    | OCH <sub>3</sub> | OCH <sub>3</sub>                                                                    |                  |    | (CH <sub>3</sub> ) <sub>2</sub>                                                     |                                                                                       | OH                                                                                    | OCH <sub>3</sub> | H                |
| 2-hydroxy-1-methoxyaporphine                                                     | OCH <sub>3</sub> | OH                                                                                  |                  |    | CH <sub>3</sub>                                                                     |                                                                                       | H                                                                                     | H                | H                |
| 6a,7-dehydrofloripavidine                                                        | OCH <sub>3</sub> |    |                  |    | CH <sub>3</sub>                                                                     |                                                                                       | H                                                                                     | H                | H                |
| 6a <i>R</i> -2'-carboxyl-thaliadin                                               | OCH <sub>3</sub> | OCH <sub>3</sub>                                                                    | OCH <sub>3</sub> |    | CH <sub>3</sub>                                                                     |                                                                                       |    | OCH <sub>3</sub> | H                |
| 6a <i>R</i> -2'-methoxycarbonyl-thaliadin                                        | OCH <sub>3</sub> | OCH <sub>3</sub>                                                                    | OCH <sub>3</sub> |    | CH <sub>3</sub>                                                                     |                                                                                       |   | OCH <sub>3</sub> | H                |
| 6a <i>R</i> -3-methoxyhernandalinol                                              | OCH <sub>3</sub> | OCH <sub>3</sub>                                                                    | OCH <sub>3</sub> |    | CH <sub>3</sub>                                                                     |                                                                                       |  | OCH <sub>3</sub> | H                |
| 6a <i>S</i> -1,3,10-trimethoxy-natalamine                                        | OCH <sub>3</sub> | OCH <sub>3</sub>                                                                    | OCH <sub>3</sub> |    | CH <sub>3</sub>                                                                     |                                                                                       |  | OCH <sub>3</sub> | H                |
| (+)-( <i>6aR</i> , <i>7R</i> )- <i>N</i> -butyrylnorushinsunine                  |                  | -O-O-                                                                               | OH               |    |  |                                                                                       | H                                                                                     | H                | H                |
| (+)-( <i>6aR</i> , <i>7R</i> , <i>E</i> )- <i>N</i> -(but-2-enoyl)norushinsunine |                  | -O-O-                                                                               | OH               |    |  |                                                                                       | H                                                                                     | H                | H                |
| 6 <i>R</i> , 6a <i>S</i> -corydine <i>N</i> -oxide                               | OH               | OCH <sub>3</sub>                                                                    |                  |    |  |                                                                                       | H                                                                                     | OCH <sub>3</sub> | OCH <sub>3</sub> |
| 6 <i>R</i> ,6a <i>S</i> -isocorydine <i>N</i> -oxide                             | OH               | OCH <sub>3</sub>                                                                    |                  |    |  |                                                                                       | H                                                                                     | OCH <sub>3</sub> | OH               |
| (+)-6 <i>S</i> -ocoteine <i>N</i> -oxide                                         |                  | -O-O-                                                                               | OCH <sub>3</sub> |    |  |                                                                                       | OCH <sub>3</sub>                                                                      | OCH <sub>3</sub> | H                |
| 7-hydroxyguatteriopsicine                                                        | OCH <sub>3</sub> | OCH <sub>3</sub>                                                                    | OCH <sub>3</sub> | OH | H                                                                                   |  | H                                                                                     | H                | H                |
| 8-hydroxy-9-methoxy-1,2-methylenedioxyaporphine                                  |                  | -O-O-                                                                               | OCH <sub>3</sub> |    | CH <sub>3</sub>                                                                     | OH                                                                                    | OCH <sub>3</sub>                                                                      | H                | H                |
| (+)-11-methoxynormeolistine crebanine                                            |                  | -O-O-                                                                               |                  |    | H                                                                                   |                                                                                       |                                                                                       | -O-O-            | OCH <sub>3</sub> |
| <i>N</i> -methylasimilobine-2- <i>O</i> -β- <i>D</i> -glucopyranoside            | OCH <sub>3</sub> |  |                  |    | CH <sub>3</sub>                                                                     |                                                                                       | H                                                                                     | H                | H                |
| stesakine-9- <i>O</i> -β- <i>D</i> -glucopyranoside                              |                  | -O-O-                                                                               |                  |    | CH <sub>3</sub>                                                                     | OCH <sub>3</sub>                                                                      |  | H                | H                |



|                                                |                  |                  |                  |                                 |        |                  |                  |                  |                  |
|------------------------------------------------|------------------|------------------|------------------|---------------------------------|--------|------------------|------------------|------------------|------------------|
| ayuthianine                                    | -O-O-            |                  |                  | CH <sub>3</sub>                 | OH     | OCH <sub>3</sub> | H                | H                | H                |
| menisperine                                    | OCH <sub>3</sub> | OCH <sub>3</sub> |                  | (CH <sub>3</sub> ) <sub>2</sub> |        |                  | H                | OCH <sub>3</sub> | OH               |
| nantenine                                      | OCH <sub>3</sub> | OCH <sub>3</sub> |                  | CH <sub>3</sub>                 |        |                  |                  | -O-O-            | H                |
| cassythicine                                   | -O-O-            |                  |                  | CH <sub>3</sub>                 |        |                  | OCH <sub>3</sub> | OCH <sub>3</sub> | H                |
| (-)- <i>O</i> -acetylsukhodianine              | -O-O-            |                  |                  | CH <sub>3</sub>                 | H, OAc | OCH <sub>3</sub> | OCH <sub>3</sub> | H                | H                |
| (-)-sukhodianine-bate- <i>N</i> -oxide         | -O-O-            |                  |                  | O, Me                           | H, OH  | OMe              | OMe              | H                | H                |
| (-)-ushinsunine- $\beta$ - <i>N</i> -oxide     | -O-O-            |                  |                  | O, Me                           | H, OH  |                  | H                | H                | H                |
| (-)-stephadiolamine- $\beta$ - <i>N</i> -oxide | -O-O-            |                  | H, OH            | O, Me                           | H, OH  |                  | H                | H                | H                |
| (+)-bulbocapnine- $\beta$ - <i>N</i> -oxide    | -O-O-            |                  |                  | O, CH <sub>3</sub>              |        |                  | H                | OCH <sub>3</sub> | OH               |
| ( <i>S</i> )-corytuberine                      | OH               | OCH <sub>3</sub> |                  | CH <sub>3</sub>                 |        |                  | H                | OCH <sub>3</sub> | OH               |
| domesticine                                    | OH               | OCH <sub>3</sub> |                  | CH <sub>3</sub>                 |        |                  |                  | -O-O-            | H                |
| ( <i>S</i> )-isoboldine                        | OH               | OCH <sub>3</sub> |                  | CH <sub>3</sub>                 |        |                  | OH               | OCH <sub>3</sub> | H                |
| isocorydine <i>N</i> -oxide                    | OCH <sub>3</sub> | OCH <sub>3</sub> |                  | O, CH <sub>3</sub>              |        |                  | H                | OCH <sub>3</sub> | OH               |
| norisocorydine                                 | OCH <sub>3</sub> | OCH <sub>3</sub> |                  | H                               |        |                  | H                | OCH <sub>3</sub> | OH               |
| norbracteoline                                 | OH               | OCH <sub>3</sub> |                  | H                               |        |                  | OCH <sub>3</sub> | OH               | H                |
| cataline                                       | OCH <sub>3</sub> | OCH <sub>3</sub> |                  | CH <sub>3</sub>                 | OH     |                  | OCH <sub>3</sub> | OCH <sub>3</sub> | H                |
| epiglaufidine                                  | OH               | OCH <sub>3</sub> | OH               | CH <sub>3</sub>                 |        |                  | H                | OCH <sub>3</sub> | OCH <sub>3</sub> |
| glaufidine                                     | OH               | OCH <sub>3</sub> | OH               | CH <sub>3</sub>                 |        |                  | H                | OCH <sub>3</sub> | OCH <sub>3</sub> |
| glaufine                                       | OCH <sub>3</sub> | OH               |                  | CH <sub>3</sub>                 |        |                  | H                | OH               | OH               |
| norcorydine                                    | OH               | OCH <sub>3</sub> |                  | H                               |        |                  | H                | OCH <sub>3</sub> | OCH <sub>3</sub> |
| <i>N</i> -methyl domesticine                   | OH               | OCH <sub>3</sub> |                  | (CH <sub>3</sub> ) <sub>2</sub> |        |                  |                  | -O-O-            | H                |
| ( <i>S</i> )-predicentrine                     | OCH <sub>3</sub> | OH               |                  | CH <sub>3</sub>                 |        |                  | OCH <sub>3</sub> | OCH <sub>3</sub> | H                |
| corydine <i>N</i> -oxide                       | OH               | OCH <sub>3</sub> |                  | O, CH <sub>3</sub>              |        |                  | H                | OCH <sub>3</sub> | OCH <sub>3</sub> |
| norisoboldine                                  | OH               | OCH <sub>3</sub> |                  |                                 |        |                  | OH               | OCH <sub>3</sub> |                  |
| hernandine                                     | -O-O-            |                  | OCH <sub>3</sub> |                                 |        |                  |                  | OH               | OCH <sub>3</sub> |
| hernangerine<br>(nandigerine)                  | -O-O-            |                  |                  |                                 |        |                  |                  | OH               | OCH <sub>3</sub> |
| nordicentrine                                  | -O-O-            |                  |                  |                                 |        |                  | OCH <sub>3</sub> | OCH <sub>3</sub> |                  |
| phanostenine                                   | -O-O-            |                  |                  | CH <sub>3</sub>                 |        |                  | OCH <sub>3</sub> | OH               |                  |
| cryptodorine                                   | -O-O-            |                  |                  |                                 |        |                  |                  | -O-O-            |                  |
| ovigerine                                      | -O-O-            |                  |                  |                                 |        |                  |                  |                  | -O-O-            |
| launobine                                      | -O-O-            |                  |                  |                                 |        |                  |                  | OCH <sub>3</sub> | OH               |
| ushinsunine                                    | -O-O-            |                  |                  | CH <sub>3</sub>                 | OH     |                  |                  |                  |                  |
| thalicsimidine                                 | OCH <sub>3</sub> | OCH <sub>3</sub> | OCH <sub>3</sub> | CH <sub>3</sub>                 |        |                  | OCH <sub>3</sub> | OCH <sub>3</sub> |                  |
| 3-hydroxynornuciferine                         | OCH <sub>3</sub> | OCH <sub>3</sub> | OH               |                                 |        |                  |                  |                  |                  |
| thaliporphine                                  | OH               | OCH <sub>3</sub> |                  | CH <sub>3</sub>                 |        |                  | OCH <sub>3</sub> | OCH <sub>3</sub> |                  |
| L-hernovine                                    | OCH <sub>3</sub> | OH               |                  |                                 |        |                  |                  | OH               | OCH <sub>3</sub> |
| hernandaline                                   | OCH <sub>3</sub> | OCH <sub>3</sub> |                  |                                 |        |                  |                  | -O-O-            |                  |
| kachirachiranine                               | OCH <sub>3</sub> | OH               |                  | CHO                             |        |                  |                  |                  |                  |
| <i>N</i> -acetylanonaine                       | -O-O-            |                  |                  | CHO                             |        |                  |                  |                  |                  |
| norstephalagine                                | -O-O-            |                  | OCH <sub>3</sub> |                                 |        |                  |                  |                  |                  |
| <i>N</i> -acetylnornuciferine                  | OCH <sub>3</sub> | OCH <sub>3</sub> |                  | CHO                             |        |                  |                  |                  |                  |
| <i>N</i> -acetylanonaine                       | -O-O-            |                  |                  | CHO                             |        |                  |                  |                  |                  |
| pukateine                                      | -O-O-            |                  |                  | CH <sub>3</sub>                 |        |                  |                  |                  | OH               |
| obovanine                                      | -O-O-            |                  |                  |                                 |        |                  |                  |                  | OH               |
| puterine                                       | -O-O-            |                  |                  |                                 |        |                  |                  |                  | OCH <sub>3</sub> |
| isopiline                                      | OH               | OCH <sub>3</sub> | OCH <sub>3</sub> |                                 |        |                  |                  |                  |                  |
| <i>O</i> -methylliridinine                     | OCH <sub>3</sub> | OCH <sub>3</sub> | OCH <sub>3</sub> | CH <sub>3</sub>                 |        |                  |                  |                  |                  |
| fibrecisine                                    | -O-O-            |                  |                  | CH <sub>3</sub>                 |        | OH               |                  |                  |                  |
| laurifoline                                    | OH               | OCH <sub>3</sub> |                  | (CH <sub>3</sub> ) <sub>2</sub> |        |                  | OH               | OCH <sub>3</sub> |                  |
| menisperine                                    | OCH <sub>3</sub> | OCH <sub>3</sub> |                  | (CH <sub>3</sub> ) <sub>2</sub> |        |                  |                  | OCH <sub>3</sub> | OH               |

|                   |                  |                  |    |                                 |                                 |  |  |  |    |    |
|-------------------|------------------|------------------|----|---------------------------------|---------------------------------|--|--|--|----|----|
| fuzitine          | OCH <sub>3</sub> | OCH <sub>3</sub> |    | (CH <sub>3</sub> ) <sub>2</sub> |                                 |  |  |  | OH | OH |
| roemrefidine      |                  | -O-O-            |    |                                 | (CH <sub>3</sub> ) <sub>2</sub> |  |  |  |    |    |
| cissaglaberrimine |                  | -O-O-            | OH |                                 |                                 |  |  |  |    |    |

Type 2

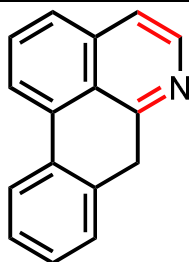

| Name                                           | 1                | 2                | 3                | 4                | 5                    | 7                               | 8                | 9                                                                                     | 10               | 11               |
|------------------------------------------------|------------------|------------------|------------------|------------------|----------------------|---------------------------------|------------------|---------------------------------------------------------------------------------------|------------------|------------------|
| artacatinine C                                 | OCH <sub>3</sub> | H                |                  | OCH <sub>3</sub> | OC<br>H <sub>3</sub> | =O                              |                  | H                                                                                     | H                | H                |
| guatterfriesidine                              |                  | -O-O-            | OCH <sub>3</sub> |                  |                      | (CH <sub>3</sub> ) <sub>2</sub> |                  | OH                                                                                    | H                | H                |
| kuafumine                                      |                  | -O-O-            | OCH <sub>3</sub> |                  |                      | =O                              | OCH <sub>3</sub> | OCH <sub>3</sub>                                                                      | H                | H                |
| liriodenine                                    |                  | -O-O-            |                  |                  |                      | =O                              |                  | H                                                                                     | H                | H                |
| lysicamine                                     | OCH <sub>3</sub> | OCH <sub>3</sub> |                  |                  |                      | =O                              |                  | H                                                                                     | H                | H                |
| oxoglaucine                                    | OCH <sub>3</sub> | OCH <sub>3</sub> |                  |                  |                      | =O                              |                  | OCH <sub>3</sub>                                                                      | OCH <sub>3</sub> | H                |
| <i>O</i> -methylmoschatoline                   | OCH <sub>3</sub> | OCH <sub>3</sub> | OCH <sub>3</sub> |                  |                      | =O                              |                  | H                                                                                     | H                | H                |
| oxocrebanine                                   |                  | -O-O-            |                  |                  |                      | =O                              | OCH <sub>3</sub> | OCH <sub>3</sub>                                                                      | H                | H                |
| oxophoebine                                    | OCH <sub>3</sub> | OCH <sub>3</sub> | OCH <sub>3</sub> |                  |                      | =O                              |                  |                                                                                       | -O-O-            | H                |
| oxopurpureine                                  | OCH <sub>3</sub> | OCH <sub>3</sub> | OCH <sub>3</sub> |                  |                      | =O                              |                  | OCH <sub>3</sub>                                                                      | OCH <sub>3</sub> | H                |
| predicentrine                                  |                  | -O-O-            |                  |                  |                      | =O                              |                  | OCH <sub>3</sub>                                                                      | OCH <sub>3</sub> | H                |
| sinofranine                                    | OH               | OCH <sub>3</sub> | OCH <sub>3</sub> |                  |                      | =O                              |                  | OCH <sub>3</sub>                                                                      | H                | H                |
| 3-hydroxyhernandonine                          |                  | -O-O-            | OH               |                  |                      | =O                              |                  | H                                                                                     |                  | -O-O-            |
| 3-methoxy-oxohernandaline                      | OCH <sub>3</sub> | OCH <sub>3</sub> | OCH <sub>3</sub> |                  |                      | =O                              |                  |  | OCH <sub>3</sub> | H                |
| 3-methoxy-2'-methoxycarbonyl-oxohernandalincin | OCH <sub>3</sub> | OCH <sub>3</sub> | OCH <sub>3</sub> |                  |                      | =O                              |                  |  | OCH <sub>3</sub> | H                |
| 8-hydroxy-1,4,5-trimethoxy-7-oxoaporphine      | OCH <sub>3</sub> | H                |                  | OCH <sub>3</sub> | OC<br>H <sub>3</sub> | =O                              | OH               | H                                                                                     | H                | H                |
| dicentrinone                                   |                  | -O-O-            |                  |                  |                      | =O                              |                  | OMe                                                                                   | OMe              | H                |
| Name                                           | 1                | 2                | 3                | 4                | 6                    | 7                               | 8                | 9                                                                                     | 10               | 11               |
| <i>N</i> -methylliriodendronine                | O                | OH               |                  |                  | CH <sub>3</sub>      | =O                              |                  | H                                                                                     | H                | H                |
| lanuginosine                                   |                  | -O-O-            |                  |                  |                      | =O                              |                  | OCH <sub>3</sub>                                                                      | H                | H                |
| oxonanthenine                                  | OCH <sub>3</sub> | OCH <sub>3</sub> |                  |                  |                      | =O                              |                  |                                                                                       | -O-O-            | H                |
| cassameridine                                  |                  | -O-O-            |                  |                  |                      | =O                              |                  |                                                                                       | -O-O-            | H                |
| oxostephanosine                                |                  | -O-O-            |                  |                  |                      | =O                              | OH               | H                                                                                     | H                | H                |
| glaunidine                                     | OCH <sub>3</sub> | OCH <sub>3</sub> |                  |                  | CH <sub>3</sub>      | =O                              |                  | H                                                                                     | OCH <sub>3</sub> | OCH <sub>3</sub> |
| corunnine                                      | OCH <sub>3</sub> | OCH <sub>3</sub> |                  |                  | CH <sub>3</sub>      | =O                              |                  | OCH <sub>3</sub>                                                                      | OCH <sub>3</sub> | H                |
| arosinine                                      | O                | OCH <sub>3</sub> |                  |                  |                      | =O                              |                  | H                                                                                     | OCH <sub>3</sub> | OH               |
| glaunine                                       | OCH <sub>3</sub> | OCH <sub>3</sub> |                  |                  |                      | =O                              |                  | H                                                                                     | OCH <sub>3</sub> | OH               |
| isofiliformine                                 |                  | -O-O-            | OCH <sub>3</sub> |                  |                      | =O                              |                  | OH                                                                                    | OCH <sub>3</sub> |                  |
| hernandonine                                   |                  | -O-O-            |                  |                  |                      | =O                              |                  |                                                                                       |                  | -O-O-            |
| atherospermidine                               |                  | -O-O-            | OCH <sub>3</sub> |                  |                      | =O                              |                  |                                                                                       |                  |                  |
| 4-methoxyoxohernandaline                       | OCH <sub>3</sub> | OCH <sub>3</sub> | OCH <sub>3</sub> |                  |                      | =O                              |                  |  | OCH <sub>3</sub> |                  |

## Types 3

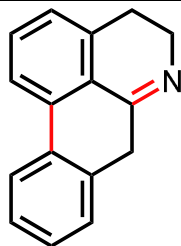

| Name                         | 1                | 2                | 3                | 4 | 5 | 6 | 7                               | 8 | 9                | 10               |
|------------------------------|------------------|------------------|------------------|---|---|---|---------------------------------|---|------------------|------------------|
| iso-9-methoxyguatterfriesine | OCH <sub>3</sub> | OH               | OCH <sub>3</sub> |   |   |   | (CH <sub>3</sub> ) <sub>2</sub> |   | OCH <sub>3</sub> | H                |
| 6,6a-dehydronorglaucine      | OCH <sub>3</sub> | OCH <sub>3</sub> |                  |   |   |   |                                 |   | OCH <sub>3</sub> | OCH <sub>3</sub> |

## Type 4

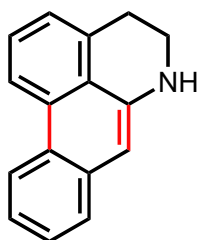

| Name                                                   | 1                | 2                | 3                | 4  | 5  | 6                               | 7                | 8 | 9                | 10               |
|--------------------------------------------------------|------------------|------------------|------------------|----|----|---------------------------------|------------------|---|------------------|------------------|
| 7-hydroxydehydronuciferine                             | OCH <sub>3</sub> | OCH <sub>3</sub> |                  |    |    | CH <sub>3</sub>                 | OH               |   |                  |                  |
| 7-methyldehydroglauicine                               | OCH <sub>3</sub> | OCH <sub>3</sub> |                  |    |    | CH <sub>3</sub>                 | OCH <sub>3</sub> |   | OCH <sub>3</sub> | OCH <sub>3</sub> |
| 7-hydroxydehydroglauicine                              | OCH <sub>3</sub> | OCH <sub>3</sub> |                  |    |    | OCH <sub>3</sub>                | OH               |   | OCH <sub>3</sub> | OCH <sub>3</sub> |
| 6a,7-didehydroboldine                                  | OCH <sub>3</sub> | OH               |                  |    |    | CH <sub>3</sub>                 |                  |   | OH               | OCH <sub>3</sub> |
| 1,2,3-trimethoxy-4,5-dioxo-6a,7-dehydroaporphine       | OCH <sub>3</sub> | OCH <sub>3</sub> | OCH <sub>3</sub> | =O | =O |                                 |                  |   |                  |                  |
| 1-hydroxy-2,3-dimethoxy-6-formyl-6a,7-dehydroaporphine | OH               | OCH <sub>3</sub> | OCH <sub>3</sub> |    |    | CHO                             |                  |   |                  |                  |
| N-formyldehydrocaaverine                               | OH               | OCH <sub>3</sub> |                  |    |    | OCH                             |                  |   |                  |                  |
| dehydrodicentrine                                      |                  | -O-O-            |                  |    |    | CH <sub>3</sub>                 |                  |   | OCH <sub>3</sub> | OCH <sub>3</sub> |
| dehydroliroferine                                      | OCH <sub>3</sub> | OCH <sub>3</sub> |                  |    |    | CH <sub>3</sub>                 |                  |   | OCH <sub>3</sub> | OH               |
| dehydronantenine                                       | OCH <sub>3</sub> | OCH <sub>3</sub> |                  |    |    | CH <sub>3</sub>                 |                  |   | -O-O-            |                  |
| didehydroglauicine                                     | OCH <sub>3</sub> | OCH <sub>3</sub> |                  |    |    | CH <sub>3</sub>                 |                  |   | OCH <sub>3</sub> | OCH <sub>3</sub> |
| cepharadione B                                         | OCH <sub>3</sub> | OCH <sub>3</sub> |                  | =O | =O | CH <sub>3</sub>                 |                  |   |                  |                  |
| artabotrysine                                          |                  | -O-O-            | OCH <sub>3</sub> |    |    |                                 |                  |   |                  |                  |
| bidebiline A                                           |                  | -O-O-            |                  |    |    | H                               |                  |   | H                | H                |
| stephadione                                            |                  | -O-O-            |                  | =O | =O | CH <sub>3</sub>                 |                  |   | -O-O-            |                  |
| corydione                                              | OCH <sub>3</sub> | OCH <sub>3</sub> |                  | =O | =O | CH <sub>3</sub>                 |                  |   | -O-O-            |                  |
| pontevedrine                                           | OCH <sub>3</sub> | OCH <sub>3</sub> |                  | =O | =O | (CH <sub>3</sub> ) <sub>2</sub> |                  |   | OCH <sub>3</sub> | OCH <sub>3</sub> |
| dehydroglauicine                                       | OCH <sub>3</sub> | OCH <sub>3</sub> |                  |    |    | CH <sub>3</sub>                 |                  |   | OCH <sub>3</sub> | OCH <sub>3</sub> |

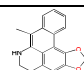

|                     |                  |                  |                  |          |          |                 |          |                  |                  |                  |
|---------------------|------------------|------------------|------------------|----------|----------|-----------------|----------|------------------|------------------|------------------|
| dihydropontevedrine | OCH <sub>3</sub> | OCH <sub>3</sub> |                  | =O       | OH       | CH <sub>3</sub> |          |                  | OCH <sub>3</sub> | OCH <sub>3</sub> |
| ouregidione         | OCH <sub>3</sub> | OCH <sub>3</sub> | OCH <sub>3</sub> | =O       | =O       |                 |          |                  |                  |                  |
| dehydrocrebanine    |                  | -O-O-            |                  |          |          | CH <sub>3</sub> |          | OCH <sub>3</sub> | OCH <sub>3</sub> |                  |
| <b>Name</b>         | <b>1</b>         | <b>2</b>         | <b>3</b>         | <b>4</b> | <b>5</b> | <b>6</b>        | <b>7</b> | <b>8</b>         | <b>10</b>        | <b>11</b>        |
| epimediphine        | -O-              | OCH <sub>3</sub> |                  |          |          | CH <sub>3</sub> | OH       |                  | OCH <sub>3</sub> | -O-              |

Type 5

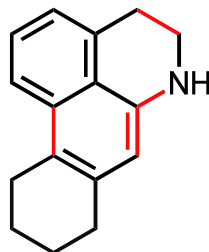

|              |                  |                  |                 |          |          |          |          |          |           |           |
|--------------|------------------|------------------|-----------------|----------|----------|----------|----------|----------|-----------|-----------|
| <b>Name</b>  | <b>1</b>         | <b>2</b>         | <b>6</b>        | <b>4</b> | <b>5</b> | <b>6</b> | <b>7</b> | <b>8</b> | <b>10</b> | <b>11</b> |
| artacinatine | OCH <sub>3</sub> | OCH <sub>3</sub> | CH <sub>3</sub> |          |          |          |          |          | OH        | =O        |

Type 6

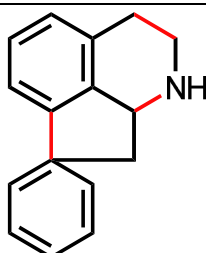

|                                      |                  |                  |          |          |          |                   |          |          |          |           |
|--------------------------------------|------------------|------------------|----------|----------|----------|-------------------|----------|----------|----------|-----------|
| <b>Name</b>                          | <b>1</b>         | <b>2</b>         | <b>3</b> | <b>4</b> | <b>5</b> | <b>6</b>          | <b>7</b> | <b>8</b> | <b>9</b> | <b>10</b> |
| pronuciferine                        | OCH <sub>3</sub> | OCH <sub>3</sub> |          |          |          | CH <sub>3</sub>   |          |          | H        | =O        |
| (+)-stepharine                       | OCH <sub>3</sub> | OCH <sub>3</sub> |          |          |          | H                 |          |          | =O       | H         |
| (+)- <i>N</i> -carboxamidostepharine | OCH <sub>3</sub> | OCH <sub>3</sub> |          |          |          | CONH <sub>2</sub> |          |          | =O       | H         |
| glaziovine                           | OH               | OCH <sub>3</sub> |          |          |          | CH <sub>3</sub>   |          |          | =O       |           |

Type 7

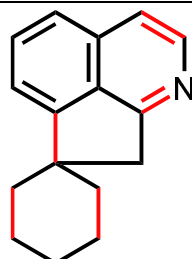

|                               |          |                  |          |          |          |          |          |          |          |           |
|-------------------------------|----------|------------------|----------|----------|----------|----------|----------|----------|----------|-----------|
| <b>Name</b>                   | <b>1</b> | <b>2</b>         | <b>3</b> | <b>4</b> | <b>5</b> | <b>6</b> | <b>7</b> | <b>8</b> | <b>9</b> | <b>10</b> |
| 8, 9-dihydroprooxocryptochine | OH       | OCH <sub>3</sub> |          |          |          |          | =O       |          |          | OH        |

Type 8

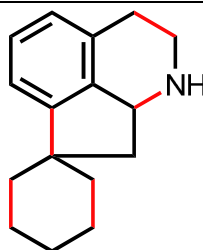

|                                |          |          |          |          |          |                 |          |          |          |           |
|--------------------------------|----------|----------|----------|----------|----------|-----------------|----------|----------|----------|-----------|
| <b>Name</b>                    | <b>1</b> | <b>2</b> | <b>3</b> | <b>4</b> | <b>5</b> | <b>6</b>        | <b>7</b> | <b>8</b> | <b>9</b> | <b>10</b> |
| litsericinone                  |          | -O-O-    |          |          |          | H               |          |          |          | =O        |
| 8,9,11,12-tetrahydromecambrine |          | -O-O-    |          |          |          | CH <sub>3</sub> |          |          |          | =O        |

|                     |       |                 |    |
|---------------------|-------|-----------------|----|
| hexahydromecambrine | -O-O- | CH <sub>3</sub> | OH |
| A                   |       |                 |    |

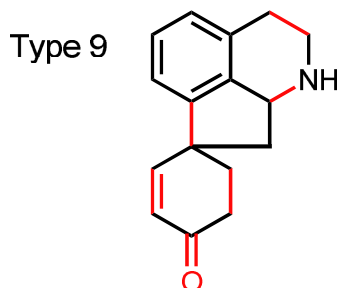

| Name                                | 1   | 2   | 3 | 4 | 5 | 6 | 7 | 8         | 9 | 10 |
|-------------------------------------|-----|-----|---|---|---|---|---|-----------|---|----|
| (-)- <i>O</i> -methylstepharinosine | OMe | OMe |   |   |   |   |   | H,<br>OMe |   | =O |
| (-)-stepharinosine                  | OMe | OMe |   |   |   |   |   | H, OH     |   | =O |
| (-)-11,12-dihydrostepharine         | OMe | OMe |   |   |   |   |   |           |   | OH |

### BBRs

Type 1

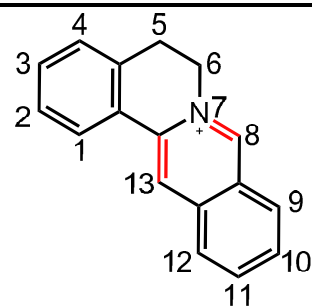

| Name                                     | 1 | 2                | 3                | 7                | 9                | 10               | 11               | 12               | 13              |
|------------------------------------------|---|------------------|------------------|------------------|------------------|------------------|------------------|------------------|-----------------|
| berberine                                |   |                  | -O-O-            |                  | OCH <sub>3</sub> | OCH <sub>3</sub> | H                |                  |                 |
| berberrubine                             |   |                  | -O-O-            |                  | OH               | OCH <sub>3</sub> | H                |                  |                 |
| columbamine                              |   | OH               | OCH <sub>3</sub> |                  | OCH <sub>3</sub> | OCH <sub>3</sub> | H                |                  |                 |
| coptisine                                |   |                  | -O-O-            |                  |                  | O-O-             | H                |                  |                 |
| dehydrocorydaline                        |   | OCH <sub>3</sub> | OCH <sub>3</sub> |                  | OCH <sub>3</sub> | OCH <sub>3</sub> | H                |                  | CH <sub>3</sub> |
| epiberberine                             |   | OH               | OH               |                  |                  | -O-O-            | H                |                  |                 |
| jatrorrhizine                            |   | OCH <sub>3</sub> | OH               |                  | OCH <sub>3</sub> | OCH <sub>3</sub> | H                |                  |                 |
| palmatine                                |   | OCH <sub>3</sub> | OCH <sub>3</sub> |                  | OCH <sub>3</sub> | OCH <sub>3</sub> | H                |                  |                 |
| pseudodehydrocorydaline                  |   | OCH <sub>3</sub> | OCH <sub>3</sub> |                  | H                | OCH <sub>3</sub> | OCH <sub>3</sub> |                  | CH <sub>3</sub> |
| 5-hydroxy-coptisine                      |   |                  | -O-O-            |                  |                  | -O-O-            | H                | OH               |                 |
| stepharanine                             |   | OH               | OCH <sub>3</sub> |                  | OCH <sub>3</sub> | OH               | H                |                  |                 |
| dehydrocheilantifoline                   |   | OH               | OMe              |                  |                  | -O-O-            | H                |                  |                 |
| 11-hydroxypalmatine                      |   | OH               | OH               |                  | OH               | OH               | OH               |                  |                 |
| dehydrocorydalmine                       |   | OCH <sub>3</sub> | OCH <sub>3</sub> |                  | OCH <sub>3</sub> | OH               | H                |                  |                 |
| 4- <i>O</i> -demethyljatrorrhizine       |   | OH               | OH               |                  | OCH <sub>3</sub> | OCH <sub>3</sub> | H                |                  |                 |
| (-)- <i>N</i> -methyltetrahydropalmatine |   |                  | OCH <sub>3</sub> | OCH <sub>3</sub> | CH <sub>3</sub>  | OCH <sub>3</sub> | OCH <sub>3</sub> |                  |                 |
| corysamine                               |   |                  | -O-O-            |                  |                  | -O-O-            |                  |                  | CH <sub>3</sub> |
| pseudocolumbamine                        |   | OH               | OCH <sub>3</sub> |                  |                  | OCH <sub>3</sub> | OCH <sub>3</sub> |                  |                 |
| dehydrocorytenchine                      |   | OCH <sub>3</sub> | OCH <sub>3</sub> |                  |                  | OCH <sub>3</sub> | OH               |                  |                 |
| pseudopalmatine                          |   | OCH <sub>3</sub> | OCH <sub>3</sub> |                  |                  | OCH <sub>3</sub> | OCH <sub>3</sub> |                  |                 |
| dehydrodiscretine                        |   | OCH <sub>3</sub> | OH               |                  |                  |                  | OCH <sub>3</sub> | OCH <sub>3</sub> |                 |

Type 2

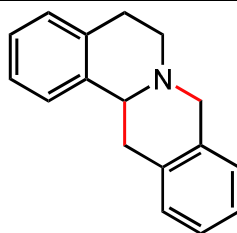

| Name                                                      | 1  | 2                | 3                | 7               | 9                | 10               | 11               | 12 | 13              |
|-----------------------------------------------------------|----|------------------|------------------|-----------------|------------------|------------------|------------------|----|-----------------|
| (+)-corybulbine                                           |    | OCH <sub>3</sub> | OH               |                 | OCH <sub>3</sub> | OCH <sub>3</sub> |                  |    | CH <sub>3</sub> |
| (+)-corydaline                                            |    | OCH <sub>3</sub> | OCH <sub>3</sub> |                 | OCH <sub>3</sub> | OCH <sub>3</sub> |                  |    |                 |
| corypalmine<br>(tetrahydrojatrorrhizine)                  |    | OCH <sub>3</sub> | OH               |                 | OCH <sub>3</sub> | OCH <sub>3</sub> |                  |    |                 |
| isocorypalmine<br>(tetrahydrocolumbamine)                 |    | OH               | OCH <sub>3</sub> |                 | OCH <sub>3</sub> | OCH <sub>3</sub> |                  |    |                 |
| (+)-nandinine                                             |    |                  | -O-O-            |                 | OH               | OCH <sub>3</sub> |                  |    |                 |
| yuanhunine                                                |    | OCH <sub>3</sub> | OCH <sub>3</sub> |                 | OCH <sub>3</sub> | OH               |                  |    |                 |
| (-)-tetrahydroberberine<br>[(-)-canadine]                 |    |                  | -O-O-            |                 | OCH <sub>3</sub> | OCH <sub>3</sub> |                  |    |                 |
| ccorydalmine                                              |    | OCH <sub>3</sub> | OCH <sub>3</sub> |                 | OCH <sub>3</sub> | OH               |                  |    |                 |
| tetrahydropalmatine                                       |    | OCH <sub>3</sub> | OCH <sub>3</sub> |                 | OCH <sub>3</sub> | OCH <sub>3</sub> |                  |    |                 |
| <i>N</i> -methylcorydalmine                               |    | OCH <sub>3</sub> | OCH <sub>3</sub> | CH <sub>3</sub> | OCH <sub>3</sub> | OH               |                  |    |                 |
| capaurine                                                 | OH | OCH <sub>3</sub> | OCH <sub>3</sub> |                 | OCH <sub>3</sub> | OCH <sub>3</sub> |                  |    |                 |
| stepholidine                                              |    | OH               | OCH <sub>3</sub> |                 | OCH <sub>3</sub> | OH               |                  |    |                 |
| stylopine(tetrahydrocopsin<br>e)                          |    |                  | -O-O-            |                 |                  | -O-O-            |                  |    |                 |
| phellodendrine ( <i>N</i> -<br>methyltetrahydroberberine) |    | OH               | OCH <sub>3</sub> |                 | H                | OCH <sub>3</sub> | OH               |    |                 |
| <i>N</i> -methyl canadine                                 |    |                  | -O-O-            | CH <sub>3</sub> | OCH <sub>3</sub> | OCH <sub>3</sub> |                  |    |                 |
| scoulerine (discretamine)                                 |    | OH               | OCH <sub>3</sub> |                 | OH               | OCH <sub>3</sub> |                  |    |                 |
| $\beta$ - <i>N</i> -<br>methylisocorypalminium            |    | OH               | OCH <sub>3</sub> | CH <sub>3</sub> | OCH <sub>3</sub> | OCH <sub>3</sub> |                  |    |                 |
| corytenchine                                              |    | OCH <sub>3</sub> | OCH <sub>3</sub> |                 |                  | OCH <sub>3</sub> | OH               |    |                 |
| isocoreximine                                             |    | OCH <sub>3</sub> | OH               |                 |                  | OCH <sub>3</sub> | OH               |    |                 |
| tetrahydropalmatrubine                                    |    | OCH <sub>3</sub> | OCH <sub>3</sub> |                 | OH               | OCH <sub>3</sub> |                  |    |                 |
| pessoine                                                  |    | OH               | OCH <sub>3</sub> |                 |                  | OH               | OH               |    |                 |
| spinosine                                                 |    | OCH <sub>3</sub> | OCH <sub>3</sub> |                 |                  | OH               | OH               |    |                 |
| sinactine                                                 |    | OCH <sub>3</sub> | OCH <sub>3</sub> |                 |                  | -O-O-            |                  |    |                 |
| 10-demethylxylopinine                                     |    | OMe              | OMe              |                 | OH               | OMe              |                  |    |                 |
| rotundine                                                 |    | OCH <sub>3</sub> | OCH <sub>3</sub> |                 | OCH <sub>3</sub> | OCH <sub>3</sub> |                  |    |                 |
| govanine                                                  |    | OH               | OCH <sub>3</sub> |                 |                  | OCH <sub>3</sub> | OCH <sub>3</sub> |    |                 |
| discretine                                                |    | OCH <sub>3</sub> | OH               |                 |                  | OCH <sub>3</sub> | OCH <sub>3</sub> |    |                 |
| xylopinine                                                |    | OCH <sub>3</sub> | OCH <sub>3</sub> |                 |                  | OCH <sub>3</sub> | OCH <sub>3</sub> |    |                 |
| cyclanoline                                               |    | OH               | OCH <sub>3</sub> | CH <sub>3</sub> | OH               | OCH <sub>3</sub> |                  |    |                 |
| cheilanthifoline                                          |    | OCH <sub>3</sub> | OH               |                 |                  | -O-O-            |                  |    |                 |

Type 3

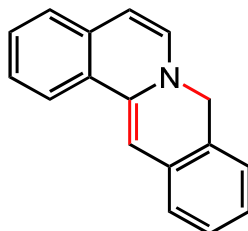

| Name         | 1 | 2                | 3                | 7 | 9                | 10               | 11 | 12 | 13 |
|--------------|---|------------------|------------------|---|------------------|------------------|----|----|----|
| oxoberberine |   | OCH <sub>3</sub> | OCH <sub>3</sub> |   | OCH <sub>3</sub> | OCH <sub>3</sub> |    |    |    |

Type 4

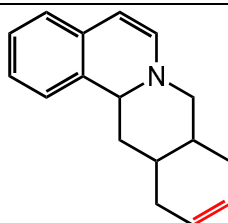

| Name                  | 1 | 2  | 3                | 7 | 9 | 10 | 11 | 12 | 13 |
|-----------------------|---|----|------------------|---|---|----|----|----|----|
| alangiifoliumines A/B |   | OH | OCH <sub>3</sub> |   |   |    |    |    |    |

### Phthalideisoquinoline (PQ)

Type 1

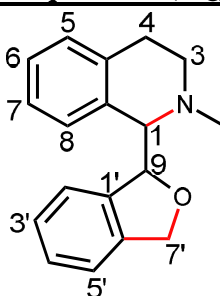

| Name                       | 2               | 6                | 7                | 8                | 2' | 3' | 4'               | 5'               | 6' | 7'                             |
|----------------------------|-----------------|------------------|------------------|------------------|----|----|------------------|------------------|----|--------------------------------|
| noscapine                  | CH <sub>3</sub> | -O-O-            |                  | OCH <sub>3</sub> |    |    | OCH <sub>3</sub> | OCH <sub>3</sub> |    | =O                             |
| corybensines A             | CH <sub>3</sub> | -O-O-            |                  |                  |    |    | -O-O-            |                  |    | OC <sub>2</sub> H <sub>5</sub> |
| corybensines B             | CH <sub>3</sub> | -O-O-            |                  |                  |    |    | -O-O-            |                  |    |                                |
| (+)-corlumidine            | CH <sub>3</sub> | OCH <sub>3</sub> | OH               |                  |    |    | -O-O-            |                  |    | =O                             |
| (+)-adlumine               | CH <sub>3</sub> | OCH <sub>3</sub> | OCH <sub>3</sub> |                  |    |    | -O-O-            |                  |    | =O                             |
| capnoidine<br>(adlumidine) | CH <sub>3</sub> | -O-O-            |                  |                  |    |    | -O-O-            |                  |    |                                |
| hydrastine                 | CH <sub>3</sub> | -O-O-            |                  |                  |    |    | OCH <sub>3</sub> | OCH <sub>3</sub> |    | =O                             |
| corledine                  | CH <sub>3</sub> | OH               | OCH <sub>3</sub> |                  |    |    | -O-O-            |                  |    | =O                             |
| corlumine                  | CH <sub>3</sub> | OCH <sub>3</sub> | OCH <sub>3</sub> |                  |    |    | -O-O-            |                  |    | =O                             |
| egenine                    | CH <sub>3</sub> | -O-O-            |                  |                  |    |    | -O-O-            |                  |    | OH                             |
| (-)-narcotoline            | CH <sub>3</sub> | -O-O-            |                  | OH               |    |    | OCH <sub>3</sub> | OCH <sub>3</sub> |    | OH                             |

Type 2

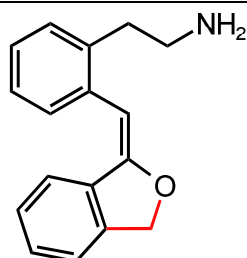

| Name                           | 2                               | 6     | 7 | 8 | 2' | 3' | 4'               | 5'               | 6' | 7' |
|--------------------------------|---------------------------------|-------|---|---|----|----|------------------|------------------|----|----|
| <i>N</i> -<br>methylhydrastine | (CH <sub>3</sub> ) <sub>2</sub> | -O-O- |   |   |    |    | OCH <sub>3</sub> | OCH <sub>3</sub> |    | =O |



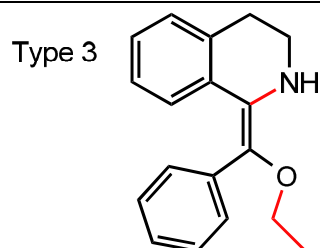

| Name           | 2               | 6     | 7 | 8                | 2'       | 3'               | 4'               | 5' | 6' | 7' |
|----------------|-----------------|-------|---|------------------|----------|------------------|------------------|----|----|----|
| papaveroxidine | CH <sub>3</sub> | -O-O- |   | OCH <sub>3</sub> | COO<br>H | OCH <sub>3</sub> | OCH <sub>3</sub> |    |    | =O |

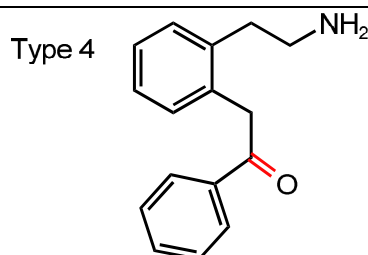

| Name          | 2                               | 6                | 7                | 8 | 2' | 3' | 4'               | 5'               | 6'   | 7' |
|---------------|---------------------------------|------------------|------------------|---|----|----|------------------|------------------|------|----|
| adlumidiceine | (CH <sub>3</sub> ) <sub>2</sub> | -O-O-            |                  |   |    |    |                  | -O-O-            | COOH |    |
| adlumiceine   | (CH <sub>3</sub> ) <sub>2</sub> | OCH <sub>3</sub> | OCH <sub>3</sub> |   |    |    |                  | -O-O-            | COOH |    |
| narceine      | (CH <sub>3</sub> ) <sub>2</sub> | -O-O-            |                  |   |    |    | OCH <sub>3</sub> | OCH <sub>3</sub> | COOH |    |
| normarceine   | CH <sub>3</sub> , H             | -O-O-            |                  |   |    |    | OCH <sub>3</sub> | OCH <sub>3</sub> | COOH |    |

### BZPs

Type 1

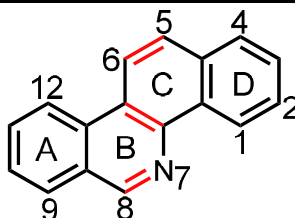

| Name                                                           | 2     | 3 | 5 | 6 | 7               | 8                | 9                | 10               | 11               | 12               |
|----------------------------------------------------------------|-------|---|---|---|-----------------|------------------|------------------|------------------|------------------|------------------|
| sanguinarine                                                   | -O-O- |   |   |   | CH <sub>3</sub> |                  |                  | -O-O-            |                  |                  |
| pancorine                                                      | -O-O- |   |   |   | -               | OCH <sub>3</sub> |                  | -O-O-            |                  |                  |
| 6-acetyldihydrochelerythrine                                   | -O-O- |   |   |   | CH <sub>3</sub> | OCH <sub>3</sub> | OCH <sub>3</sub> | OCH <sub>3</sub> |                  |                  |
| chelerythrine                                                  | -O-O- |   |   |   | CH <sub>3</sub> |                  | OCH <sub>3</sub> | OCH <sub>3</sub> |                  |                  |
| fargaridine                                                    | -O-O- |   |   |   | CH <sub>3</sub> |                  | OCH <sub>3</sub> | OH               |                  |                  |
| zanthoxyline                                                   | -O-O- |   |   |   | -               |                  |                  | H                | OH               | OMe              |
| O-methylzanthoxyline                                           | -O-O- |   |   |   | -               |                  |                  | H                | OMe              | OMe              |
| rhoifoline B                                                   | -O-O- |   |   |   | -               | OMe              |                  | OMe              | OMe              |                  |
| N-nornitidine                                                  | -O-O- |   |   |   | -               |                  |                  | OMe              | OMe              |                  |
| nitidine                                                       | -O-O- |   |   |   | CH <sub>3</sub> |                  |                  | OMe              | OMe              |                  |
| isodecarine                                                    | -O-O- |   |   |   | -               |                  | OH               | OCH <sub>3</sub> |                  |                  |
| norchelerythrine                                               | -O-O- |   |   |   | -               |                  | OCH <sub>3</sub> | OCH <sub>3</sub> |                  |                  |
| decarine                                                       | -O-O- |   |   |   | -               |                  | OCH <sub>3</sub> | OH               |                  |                  |
| 8-hydroxy-9-methoxy-2,3-(methylenedioxy)benzo[c]phenanthridine | -O-O- |   |   |   | -               |                  |                  | OH               | OCH <sub>3</sub> |                  |
| sanguinarine                                                   | -O-O- |   |   |   | CH <sub>3</sub> |                  |                  | -O-O-            |                  | H                |
| chelilutine                                                    | -O-O- |   |   |   | CH <sub>3</sub> |                  |                  | -O-O-            |                  |                  |
| chelirubine                                                    | -O-O- |   |   |   | CH <sub>3</sub> |                  |                  | -O-O-            |                  | OCH <sub>3</sub> |

|                 |       |  |                 |                 |       |                  |
|-----------------|-------|--|-----------------|-----------------|-------|------------------|
| norsanguinarine | -O-O- |  | -               |                 | -O-O- |                  |
| oxychelirubine  | -O-O- |  | CH <sub>3</sub> | =O              | -O-O- | OCH <sub>3</sub> |
| macarpine       | -O-O- |  | OCH<br>3        | CH <sub>3</sub> | -O-O- | OCH <sub>3</sub> |

Type 2

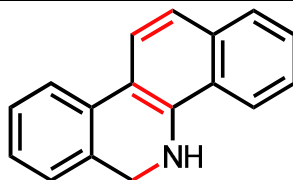

| Name                                                | 2                | 3                | 5 | 6 | 7                  | 8                | 9                | 10               | 11               | 12 |
|-----------------------------------------------------|------------------|------------------|---|---|--------------------|------------------|------------------|------------------|------------------|----|
| angoline                                            | -O-O-            |                  |   |   | CH <sub>3</sub>    | OCH <sub>3</sub> | OCH <sub>3</sub> | OCH <sub>3</sub> |                  |    |
| oxynitidine                                         | -O-O-            |                  |   |   | CH <sub>3</sub>    | =O               | H                | OCH <sub>3</sub> | OCH <sub>3</sub> |    |
| (±)-6-acetyldihydrosanguinarine                     | -O-O-            |                  |   |   | CH <sub>3</sub>    |                  |                  | -O-O-            |                  |    |
| 2'-(5, 6-dihydrochleletrythrine-6-yl) ethyl acetate | -O-O-            |                  |   |   | CH <sub>3</sub>    |                  | OMe              | OMe              |                  |    |
| 6-acetyldihydrochelerythrine                        | -O-O-            |                  |   |   | CH <sub>3</sub>    |                  | OMe              | OMe              |                  |    |
| 6β-hydroxymethyldihydronitidine                     | -O-O-            |                  |   |   | CH <sub>3</sub>    |                  | H                | OMe              | OMe              |    |
| bocconoline                                         | -O-O-            |                  |   |   | CH <sub>3</sub>    |                  | OMe              | OMe              |                  |    |
| 8-demethoxychelerythrine                            | -O-O-            |                  |   |   | CH <sub>3</sub>    | =O               | OCH <sub>3</sub> | OH               |                  |    |
| oxychelerythrine                                    | -O-O-            |                  |   |   | CH <sub>3</sub>    | =O               | OCH <sub>3</sub> | OCH <sub>3</sub> |                  |    |
| dihydrocherythrinylacetaldehyde                     | -O-O-            |                  |   |   | CH <sub>3</sub>    |                  | OCH <sub>3</sub> | OCH <sub>3</sub> |                  |    |
| 6-hydroxydihydrochelerythrine                       | -O-O-            |                  |   |   | CH <sub>3</sub>    | H, OH            | OCH <sub>3</sub> | OCH <sub>3</sub> |                  |    |
| 6-methoxy-7-hydroxydihydrochelerythrine             | -O-O-            |                  |   |   | CH <sub>3</sub>    |                  | OCH <sub>3</sub> | OCH <sub>3</sub> |                  |    |
| dihydrosanguinarine                                 | -O-O-            |                  |   |   | H, CH <sub>3</sub> | H                |                  | -O-O-            |                  |    |
| dihydrochelerythrine                                | OCH <sub>3</sub> | OCH <sub>3</sub> |   |   | H, CH <sub>3</sub> | H                | OCH <sub>3</sub> | OCH <sub>3</sub> |                  |    |
| oxysanguinarine                                     | -O-O-            |                  |   |   | H, CH <sub>3</sub> | =O               |                  | -O-O-            |                  |    |
| 6-acetylsanguinarine                                | -O-O-            |                  |   |   | H, CH <sub>3</sub> |                  |                  | -O-O-            |                  |    |
| oxosanguinarine                                     | -O-O-            |                  |   |   | =O                 | CH <sub>3</sub>  |                  | -O-O-            |                  |    |
| (ξ)-8-acetyldihydrosanguinarine                     | -O-O-            |                  |   |   | CH <sub>3</sub>    |                  |                  | -O-O-            |                  |    |
| dihydrochelerythrinyl-8-acetaldehyde                | -O-O-            |                  |   |   | CH <sub>3</sub>    |                  | OCH <sub>3</sub> | OCH <sub>3</sub> |                  |    |
| 8-Iminosanguinarine                                 | -O-O-            |                  |   |   | CH <sub>3</sub>    | =NH              |                  | -O-O-            |                  |    |
| dihydrochelerythrine                                | -O-O-            |                  |   |   | OCH<br>3           |                  | OCH <sub>3</sub> | OCH <sub>3</sub> |                  |    |

### Type 3

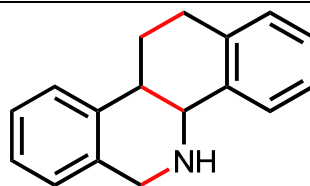

| Name               | 2     | 3 | 5 | 6  | 7 | 8 | 9 | 10    | 11 | 12 |
|--------------------|-------|---|---|----|---|---|---|-------|----|----|
| chelidonine        | -O-O- |   |   | OH |   |   |   | -O-O- |    |    |
| (-)-norchelidonine | -O-O- |   |   |    |   |   |   | -O-O- |    |    |
| homochelidonine    | -O-O- |   |   | OH |   |   |   |       |    |    |

### Type 4

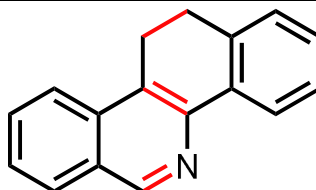

| Name        | 2     | 3 | 5 | 6  | 7 | 8 | 9 | 10    | 11 | 12 |
|-------------|-------|---|---|----|---|---|---|-------|----|----|
| (R)-luguine | -O-O- |   |   | OH |   |   |   | -O-O- | H  | H  |

### Type 5

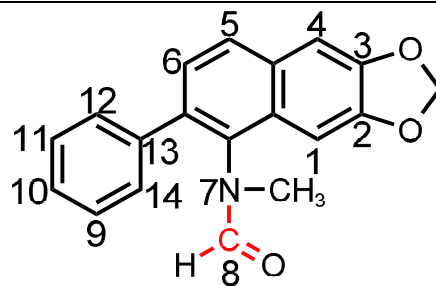

| Name           | 2 | 3 | 5 | 6 | 7 | 8 | 9                | 10               | 11 | 14 |
|----------------|---|---|---|---|---|---|------------------|------------------|----|----|
| arnottianamide |   |   |   |   |   |   | OCH <sub>3</sub> | OCH <sub>3</sub> | H  | OH |

### Protopines

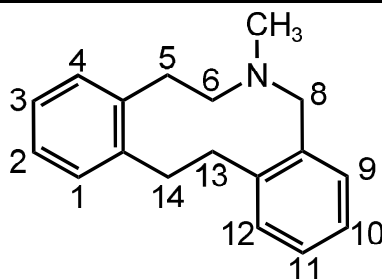

| Name             | 1                | 2                | 3                | 9                | 10               | 11    | 12    | 13  | 14 |
|------------------|------------------|------------------|------------------|------------------|------------------|-------|-------|-----|----|
| protopine        |                  | -O-O-            |                  |                  | -O-O-            |       |       |     | =O |
| allocryptopine   |                  | -O-O-            |                  | OCH <sub>3</sub> | OCH <sub>3</sub> |       |       |     | =O |
| argemexicaine A  |                  | -O-O-            |                  |                  |                  |       | -O-O- |     | =O |
| argemexicaine B  | OCH <sub>3</sub> | OCH <sub>3</sub> |                  |                  | -O-O-            |       |       |     | =O |
| cryptopine       |                  | OCH <sub>3</sub> | OCH <sub>3</sub> |                  | -O-O-            |       |       |     | =O |
| glauciumoline    |                  | -O-O-            |                  | OCH <sub>3</sub> | OCH <sub>3</sub> |       |       | -O- |    |
| fagarine I       |                  | -O-O-            |                  | OCH <sub>3</sub> | OCH <sub>3</sub> |       |       |     | =O |
| muramine         |                  | OCH <sub>3</sub> | OCH <sub>3</sub> | OCH <sub>3</sub> | OCH <sub>3</sub> |       |       |     | =O |
| coulteropine     | OCH <sub>3</sub> | -O-O-            |                  |                  | -O-O-            |       |       |     | =O |
| dihydroprotopine |                  | -O-O-            |                  |                  | -O-O-            |       |       |     | OH |
| pseudoprotopine  |                  | -O-O-            |                  |                  |                  | -O-O- |       |     | =O |
| constrictosine   |                  |                  | OH               |                  | OH               |       |       |     | =O |

**Pavines**

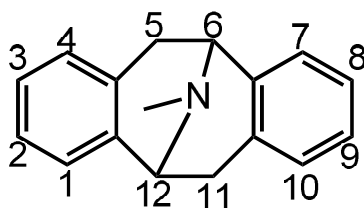

| Name                          | 1  | 2                | 3                | 4     | 7  | 8                | 9                |
|-------------------------------|----|------------------|------------------|-------|----|------------------|------------------|
| argemonine                    |    | OCH <sub>3</sub> | OCH <sub>3</sub> |       |    | OCH <sub>3</sub> | OCH <sub>3</sub> |
| eschscholtzidine              |    |                  | -O-O-            |       |    | OCH <sub>3</sub> | OCH <sub>3</sub> |
| thalimonine                   |    | OCH <sub>3</sub> |                  | -O-O- |    | OCH <sub>3</sub> | OCH <sub>3</sub> |
| crychine                      |    |                  | -O-O-            |       |    |                  | -O-O-            |
| caryachine                    |    |                  | -O-O-            |       |    | OH               | OCH <sub>3</sub> |
| neocaryachine                 |    |                  | -O-O-            |       | OH | OCH <sub>3</sub> |                  |
| bisnorargemonine              |    | OH               | OCH <sub>3</sub> |       |    | OCH <sub>3</sub> | OH               |
| (-)-2-<br>demethylthalimonine |    | OH               |                  | -O-O- |    | OCH <sub>3</sub> | OCH <sub>3</sub> |
| (-)-9-<br>demethylthalimonine |    | OCH <sub>3</sub> |                  | -O-O- |    | OCH <sub>3</sub> | OH               |
| thalimonine                   |    | OCH <sub>3</sub> |                  | -O-O- |    | OCH <sub>3</sub> | OCH <sub>3</sub> |
| norargemonine                 |    | OH               | OCH <sub>3</sub> |       |    | OCH <sub>3</sub> | OCH <sub>3</sub> |
| munitagine                    | OH | OCH <sub>3</sub> |                  |       |    | OH               | OCH <sub>3</sub> |
| platycerine                   | OH | OCH <sub>3</sub> |                  |       |    | OCH <sub>3</sub> | OCH <sub>3</sub> |

Supplementary Table 2. The distribution of BIAs in plants.

| order     | family           | genus               | species                                                           | distribution              | BIAs                                                                                                                                                                                                                      | references                              |
|-----------|------------------|---------------------|-------------------------------------------------------------------|---------------------------|---------------------------------------------------------------------------------------------------------------------------------------------------------------------------------------------------------------------------|-----------------------------------------|
| Piperales | Aristolochiaceae | <i>Aristolochia</i> | <i>Aristolochia constricta</i>                                    | aerial parts              | <b>BBRs:</b> (-)-8â-(4'-hydroxybenzyl)-2,3-dimethoxyberbin<br><b>Protopines:</b> 3,10-dihydroxy- <i>N</i> -demethyl-4, 8-didehydroprotopine, constrictosine, 3- <i>O</i> -methylconstrictosine, 5,6-dihydroconstrictosine | <a href="#">1</a> , <a href="#">2</a>   |
|           |                  |                     | <i>Aristolochia debilis</i>                                       | stems                     | <b>Aporphines:</b> magnoflorine                                                                                                                                                                                           | <a href="#">3</a>                       |
|           |                  |                     | <i>Aristolochia lagesiana</i>                                     | leaves                    | <b>Aporphines:</b> (+)-isocorydine, (+)-norisocorydine, (+)-corydine Na-oxide, (+)-corydine                                                                                                                               | <a href="#">4</a>                       |
| Piperales | Piperaceae       | <i>Piper</i>        | <i>Piper erecticaule</i>                                          | aerial parts              | <b>Aporphines:</b> aristolactam AII, aristolactam BII, piperolactam A, piperolactam C, piperolactam D                                                                                                                     | <a href="#">5</a>                       |
|           |                  |                     | <i>Piper methysticum</i>                                          | roots                     | <b>Aporphines:</b> cepharadione A                                                                                                                                                                                         | <a href="#">6</a>                       |
|           |                  |                     | <i>Piper puberulum</i>                                            | stems, leaves             | <b>Aporphines:</b> puberulumine G                                                                                                                                                                                         | <a href="#">7</a>                       |
|           |                  |                     | <i>Piper nigrum</i>                                               | roots                     | <b>Aporphines:</b> cepharadione A, piperolactam D                                                                                                                                                                         | <a href="#">8</a>                       |
|           |                  |                     | <i>Piper semimmersum</i>                                          | aerial parts              | <b>Aporphines:</b> semiimmersumine A, semiimmersumine B, liriodenine                                                                                                                                                      | <a href="#">9</a>                       |
| Laurales  | Lauraceae        | <i>Alseodaphne</i>  | <i>Alseodaphne corneri</i>                                        | leaves, barks             | <b>bisBIAs:</b> (-)-gyrolidine, (+)- <i>O</i> -methyllimacusine, (+)-2-norobaberine, norstephasubine, (+)-stephasubine<br><b>Aporphines:</b> (+)-laurotetanine, isocorydine, norisocorydine                               | <a href="#">10</a> , <a href="#">11</a> |
|           |                  |                     | <i>Alseodaphne perakensis</i>                                     | barks                     | <b>Aporphines:</b> <i>N</i> -cyanomethylnorboldine, <i>N</i> -methylaurotetanine, norboldine                                                                                                                              | <a href="#">12</a>                      |
|           | Lauraceae        | <i>Cassytha</i>     | <i>Cassytha filiformis</i>                                        | aerial parts, whole herbs | <b>Morphinans:</b> (-)- <i>O</i> -methylflavinatine, (-)-salutaridine<br><b>Aporphines:</b> neolitsine, dicentrine, cassythine (cassyfiline), actinodaphnine, isofiliformine                                              | <a href="#">13</a> , <a href="#">14</a> |
|           | Lauraceae        | <i>Cinnamomum</i>   | <i>Cinnamomum mollissimum</i>                                     | barks                     | <b>Aporphines:</b> <i>N</i> -methyl-1,2,10-trimethoxyaporphine, <i>N</i> -methylhernagine, <i>N</i> -methylhernovine, hernagine, hernovine                                                                                | <a href="#">15</a>                      |
|           | Lauraceae        | <i>Cryptocarya</i>  | <i>Cryptocarya chinensis</i>                                      | leaves                    | <b>Pavines:</b> (-)-crychine, (-)-caryachine, (+)- <i>O</i> -methylcaryachine, neocaryachine                                                                                                                              | <a href="#">16</a>                      |
|           |                  |                     | <i>Cryptocarya densiflora</i><br>( <i>Cryptocarya laevigata</i> ) | leaves, stem barks        | <b>1-BIAs:</b> reticuline<br><b>Aporphines:</b> (+)-laurotetanine, (+)-nornantenine, (+)- <i>N</i> -methylaurotetanine                                                                                                    | <a href="#">17</a> , <a href="#">18</a> |

|           |                 |                                   |                  |                                                                                                                                                                                                         |                        |
|-----------|-----------------|-----------------------------------|------------------|---------------------------------------------------------------------------------------------------------------------------------------------------------------------------------------------------------|------------------------|
|           |                 | <i>Cryptocarya griffithiana</i>   | barks            | <b>Pavines:</b> crychine, (-)-isocaryachine, (-)-neocaryachine                                                                                                                                          | <a href="#">19</a>     |
|           |                 | ( <i>Cryptocarya infectoria</i> ) |                  | <b>1-BIAs:</b> reticuline, (+)- <i>N</i> -methylisococlaurine                                                                                                                                           |                        |
|           |                 | <i>Cryptocarya wrayi</i>          | twigs            | <b>Aporphines:</b> (+)-laurotetanine                                                                                                                                                                    | <a href="#">20</a>     |
| Lauraceae | <i>Dehaasia</i> | <i>Dehaasia longipedicellata</i>  | barks            | <b>Pavines:</b> (-)-12hydroxyescholtzidine                                                                                                                                                              | <a href="#">21</a>     |
|           |                 |                                   |                  | <b>1-BIAs:</b> reticuline                                                                                                                                                                               |                        |
|           |                 |                                   |                  | <b>bisBIAs:</b> (-)- <i>O</i> - <i>O</i> -dimethylgrisabine                                                                                                                                             |                        |
|           |                 |                                   |                  | <b>Morphinans:</b> (+)-sebiferine, (-)-milonine                                                                                                                                                         |                        |
|           |                 |                                   |                  | <b>Aporphines:</b> boldine, (-)-norboldine                                                                                                                                                              |                        |
| Lauraceae | <i>Lindera</i>  | <i>Lindera aggregata</i>          | roots            | <b>1-BIAs:</b> (1 <i>R</i> , 1' <i>R</i> )-11,11'-biscoclaurine, (1 <i>S</i> )-5'- <i>O</i> - <i>p</i> -hydroxybenzoyl norreticuline, norjuziphine, reticuline, reticuline <i>N</i> -oxide              | <a href="#">22</a>     |
|           |                 |                                   |                  | <b>bisBIAs:</b> (1' <i>S</i> )-12'-hydroxyl-linderegatine, (1 <i>R</i> , 1' <i>R</i> )-11,11'-biscoclaurine, costaricine, linderegatine, lindoldhamine                                                  |                        |
|           |                 |                                   |                  | <b>Aporphines:</b> <i>N</i> -methylaurotetanine, laurotetanine, actinodaphnine, isoboldine, laurilitsine, norisoboldine, boldine, boldine <i>N</i> -oxide, <i>N</i> -methylaurotetanine <i>N</i> -oxide |                        |
|           |                 | <i>Lindera angustifolia</i>       | roots            | <b>1-BIAs:</b> reticuline, magnocurarine                                                                                                                                                                | <a href="#">23</a>     |
|           |                 |                                   |                  | <b>Aporphines:</b> laurotetanine, <i>N</i> -methylaurotetanine, boldine, norboldine, <i>N</i> -ethoxycarbonyllaurotetanine                                                                              |                        |
|           |                 | <i>Lindera chunii</i>             | roots            | <b>Aporphines:</b> hernandine, hernangerine, hernandonine, norboldine, 7-oxohernangerine, 7-oxohernagine, ocokryptine, <i>N</i> -methylhernangerine, laurilitsine                                       | <a href="#">24</a>     |
|           |                 | <i>Lindera fragrans</i>           | leaves           | <b>Aporphines:</b> nordicentrine, phanostenine, cryptodorine, neolitsine, anolobine                                                                                                                     | <a href="#">25</a>     |
|           |                 | <i>Lindera megaphylla</i>         | roots            | <b>Aporphines:</b> <i>d</i> -dicentrine                                                                                                                                                                 | <a href="#">26</a>     |
|           |                 | <i>Lindera myrrha</i>             | roots            | <b>Aporphines:</b> laurilitsine, corydine, hernandine, ovigerine, hernangerine (nandigerine)                                                                                                            | <a href="#">27</a>     |
|           |                 | <i>Lindera pulcherrima</i>        | roots            | <b>Aporphines:</b> launobine, nantenine, dehydronantenine                                                                                                                                               | <a href="#">28</a>     |
| Lauraceae | <i>Litsea</i>   | <i>Litsea cubeba</i>              | roots, rhizomes, | <b>1-BIAs:</b> reticuline, (-)- <i>N</i> -methoxycarbonyl-norjuziphine                                                                                                                                  | <a href="#">29, 30</a> |
|           |                 |                                   | leaves           | <b>Aporphines:</b> (+)-norboldine, (+)-boldine, (+)-isoboldine, (+)-laurotetanine, (+)- <i>N</i> -methylaurotetanine                                                                                    |                        |
|           |                 | <i>Litsea fruticosa</i>           | leaves           | <b>Aporphines:</b> boldine, laurilitsine, actinodaphnine, ushinsunine, norisocorydine                                                                                                                   | <a href="#">31</a>     |

|           |               |                                 |                                   |                                                                                                                                                                                                                                                                                                                       |                                         |
|-----------|---------------|---------------------------------|-----------------------------------|-----------------------------------------------------------------------------------------------------------------------------------------------------------------------------------------------------------------------------------------------------------------------------------------------------------------------|-----------------------------------------|
| Lauraceae | <i>Ocotea</i> | <i>Litsea glutinosa</i>         | barks,<br>leaves,<br>twigs, roots | <b>Aporphines:</b> laurolitsine, boldine, litseglutine A, litseglutine B, boldine, laurolitsine, litsine A                                                                                                                                                                                                            | <a href="#">32</a> , <a href="#">33</a> |
|           |               | <i>Litsea lancifolia</i>        | barks                             | <b>1-BIAs:</b> reticuline<br><b>bisBIAs:</b> lancifoliaine<br><b>Morphinans:</b> pallidine<br><b>Aporphines:</b> actinodaphnine, cassythicine, boldine, norboldine                                                                                                                                                    | <a href="#">34</a>                      |
|           |               | <i>Litsea wightiana</i>         | stems                             | <b>Aporphines:</b> glaucine, boldine, norboldine, isoboldine, norcorydine, laurotetanine                                                                                                                                                                                                                              | <a href="#">35</a>                      |
|           |               | <i>Ocotea acutifolia</i>        | leaves,<br>trunk barks            | <b>Aporphines:</b> (+)-6 <i>S</i> -ocoteine <i>N</i> -oxide, (+)-norocoxylonine, (+)-thalicsimidine, (+)-neolitsine, (+)- <i>O</i> -methylcassyfiline<br><b>Morphinans:</b> (+)-pallidine<br><b>1-BIAs:</b> (+)-reticuline                                                                                            | <a href="#">36</a>                      |
|           |               | <i>Ocotea caudata</i>           | leaves                            | <b>Morphinans:</b> (+)-pallidine<br><b>Aporphines:</b> (+)-3-hydroxynornuciferine, (+)-3-methoxynordomesticine, (+)-isoboldine, (+)-boldine<br><b>1-BIAs:</b> 6 <i>aR</i> -(-)-reticuline, 6 <i>aR</i> -(-)-coclaurine<br><b>Aporphines:</b> 6 <i>aR</i> -(-)-isoboldine, 6 <i>aS</i> ,7 <i>S</i> -(-)-diospirifoline | <a href="#">37</a>                      |
|           |               | <i>Ocotea diospyrifolia</i>     | leaves,<br>barks                  | <b>1-BIAs:</b> 6 <i>aR</i> -(-)-reticuline, 6 <i>aR</i> -(-)-coclaurine<br><b>Aporphines:</b> 6 <i>aR</i> -(-)-isoboldine, 6 <i>aS</i> ,7 <i>S</i> -(-)-diospirifoline                                                                                                                                                | <a href="#">38</a>                      |
|           |               | <i>Ocotea duckei</i>            | leaves                            | <b>1-BIAs:</b> reticuline                                                                                                                                                                                                                                                                                             | <a href="#">39</a>                      |
|           |               | <i>Ocotea leucoxydon</i>        | -                                 | <b>Aporphines:</b> dicentrinone, dicentrinone<br><b>BZPs:</b> nitidine                                                                                                                                                                                                                                                | <a href="#">40</a>                      |
|           |               | <i>Ocotea macrophylla</i>       | woods                             | <b>Aporphines:</b> ( <i>S</i> )-3-methoxy-nordomesticine, ( <i>S</i> )- <i>N</i> -ethoxycarbonyl-3-methoxy-nordomesticine, ( <i>S</i> )- <i>N</i> -formyl-3-methoxy-nordomesticine, ( <i>S</i> )- <i>N</i> -methoxycarbonyl-3-methoxy-nordomesticine<br><b>1-BIAs:</b> magnocurarine, <i>N</i> -methylhigenamine      | <a href="#">41</a>                      |
|           |               | <i>Ocotea paranapiacabensis</i> | leaves                            | <b>1-BIAs:</b> magnocurarine, <i>N</i> -methylhigenamine                                                                                                                                                                                                                                                              | <a href="#">42</a>                      |
|           |               | <i>Ocotea puberula</i>          | leaves,<br>barks                  | <b>Aporphines:</b> dicentrine- $\beta$ - <i>N</i> -oxide, dehydrodicentrine, predicentrine, <i>N</i> -methylaurotetanine, cassythicine, dicentrine                                                                                                                                                                    | <a href="#">43</a>                      |
|           |               | <i>Ocotea spixiana</i>          | twigs                             | <b>1-BIAs:</b> reticuline, magnocurarine, armepavine, coclaurine<br><b>Aporphines:</b> boldine, corytuberine, <i>N</i> -methyl                                                                                                                                                                                        | <a href="#">44</a>                      |



|           |                  |                                  |                               |                                                                                                                                                                                                                    |                    |
|-----------|------------------|----------------------------------|-------------------------------|--------------------------------------------------------------------------------------------------------------------------------------------------------------------------------------------------------------------|--------------------|
|           |                  |                                  |                               | predicentrine, xanthoplanine, glaucine, <i>N</i> -methyl boldine, predicentrine, isocoridyne, <i>N</i> -methyl glaucine, <i>N</i> -methyl isodomeesticine, nantenine, isodomeesticine, <i>N</i> -methyl nantenine, |                    |
|           |                  | <i>Ocotea vellosiana</i>         | fruits                        | <b>1-BIAs:</b> (+)-reticuline                                                                                                                                                                                      | <a href="#">45</a> |
| Lauraceae | <i>Phoebe</i>    | <i>Phoebe grandis</i>            | leaves                        | <b>Aporphines:</b> glaucine, corydine, (+)-isocorydine                                                                                                                                                             | <a href="#">46</a> |
|           |                  | <i>Phoebe tavoyana</i>           | leaves                        | <b>Aporphines:</b> lysicamine, litsericinone, 8,9,11,12-tetrahydromecambrine, hexahydromecambrine A                                                                                                                | <a href="#">47</a> |
|           |                  |                                  |                               | <b>Morphinans:</b> sebiferine                                                                                                                                                                                      |                    |
| Lauraceae | <i>Dehaasia</i>  | <i>Dehaasia longipedicellata</i> | barks                         | <b>Aporphines:</b> tavoyanine A, laetanine, roemerine, laurohitsine, boldine                                                                                                                                       | <a href="#">48</a> |
|           |                  |                                  |                               | <b>1-BIAs:</b> (-)-reticuline                                                                                                                                                                                      |                    |
|           |                  |                                  |                               | <b>bisBIAs:</b> (-)- <i>O</i> -dimethylgrisabine                                                                                                                                                                   |                    |
|           |                  |                                  |                               | <b>Morphinans:</b> (+)-sebiferine, (-)-milonine                                                                                                                                                                    |                    |
| Lauraceae | <i>Neolitsea</i> | <i>Neolitsea aurata</i>          | barks, woods                  | <b>Aporphines:</b> (-)-boldine, (-)-norboldine                                                                                                                                                                     | <a href="#">49</a> |
|           |                  | <i>Neolitsea aciculata</i>       | roots                         | <b>Aporphines:</b> laurohitsine, 10- <i>O</i> -methylhernovine, nandigerine, ovigerine, <i>N</i> -methyllovigerine, lindcarpine                                                                                    | <a href="#">50</a> |
|           |                  | <i>Neolitsea acuminatissima</i>  | stem barks, barks             | <b>1-BIAs:</b> (+)-reticuline                                                                                                                                                                                      | <a href="#">50</a> |
|           |                  |                                  |                               | <b>Aporphines:</b> laurotetanine, <i>N</i> -methyl laurotetanine                                                                                                                                                   |                    |
|           |                  |                                  |                               | <b>1-BIAs:</b> (+)-reticuline, neolitacumonine                                                                                                                                                                     |                    |
|           |                  |                                  |                               | <b>Morphinans:</b> (+)- <i>O</i> -methylflavinantine                                                                                                                                                               |                    |
|           |                  |                                  |                               | <b>Aporphines:</b> (+)-boldine, laurotetanine, (+)-isoboldine, (+)-actinodaphnine, <i>N</i> -methylactinodaphnine, (-)-anonaine, (-)-thalicsimidine, (+)-cassythine, oxoglaucine, liriodenine, (-)-norushinsunine  | <a href="#">50</a> |
|           |                  | <i>Neolitsea buisanensis</i>     | woods                         | <b>Aporphines:</b> laurohitsine, litsericine                                                                                                                                                                       | <a href="#">50</a> |
|           |                  | <i>Neolitsea dealbata</i>        | barks                         | <b>1-BIAs:</b> (1 <i>S</i> )-norjuziphine, (1 <i>S</i> )-juziphine                                                                                                                                                 | <a href="#">50</a> |
|           |                  |                                  |                               | <b>Aporphines:</b> (+)-boldine, (+)-actinodaphnine, (6 <i>aR</i> )-roemerine, (6 <i>S</i> ,6 <i>aR</i> )-roemerine Na                                                                                              |                    |
|           |                  |                                  |                               | -oxide, (6 <i>R</i> ,6 <i>aR</i> )-roemerine Nb                                                                                                                                                                    |                    |
|           |                  |                                  |                               | -oxide, (6 <i>aR</i> )-normecambriline                                                                                                                                                                             |                    |
|           |                  | <i>Neolitsea fuscata</i>         | stem barks                    | <b>Aporphines:</b> (+)-isoboldine                                                                                                                                                                                  | <a href="#">50</a> |
|           |                  | <i>Neolitsea konishii</i>        | barks, stem woods, stem barks | <b>1-BIAs:</b> (+)-reticuline                                                                                                                                                                                      | <a href="#">50</a> |
|           |                  |                                  |                               | <b>Morphinans:</b> pallidine                                                                                                                                                                                       |                    |
|           |                  |                                  |                               | <b>Aporphines:</b> (+)-boldine, thaliporphine, <i>N</i> -                                                                                                                                                          |                    |

|               |                  |                                |                                |                                                                                                                                                                                                                                                                                                                                                                                                                                                                                                                                                                                                                                                                                                                        |                        |
|---------------|------------------|--------------------------------|--------------------------------|------------------------------------------------------------------------------------------------------------------------------------------------------------------------------------------------------------------------------------------------------------------------------------------------------------------------------------------------------------------------------------------------------------------------------------------------------------------------------------------------------------------------------------------------------------------------------------------------------------------------------------------------------------------------------------------------------------------------|------------------------|
|               |                  |                                |                                | methyllaurotetanine, laurotetanine, (-)-nornuciferine, lauroitsine, (+)-isoboldine, (+)-actinodaphnine, (+)-corytuberine, corydine, stepharine, glaziovine                                                                                                                                                                                                                                                                                                                                                                                                                                                                                                                                                             |                        |
|               |                  | <i>Neolitsea parvigemma</i>    | stems                          | <b>Aporphines:</b> glaucine, (+)-actinodaphnine, <i>N</i> -methylactinodaphnine, oxoglucaine, (-)-roemerine                                                                                                                                                                                                                                                                                                                                                                                                                                                                                                                                                                                                            | <a href="#">50</a>     |
|               |                  | <i>Neolitsea pulchella</i>     | leaves                         | <b>Aporphines:</b> neolitsine                                                                                                                                                                                                                                                                                                                                                                                                                                                                                                                                                                                                                                                                                          | <a href="#">50</a>     |
|               |                  | <i>Neolitsea pubescens</i>     | barks                          | <b>Aporphines:</b> (+)-boldine, <i>N</i> -methyllaurotetanine, lauroitsine, (-)-roemerine                                                                                                                                                                                                                                                                                                                                                                                                                                                                                                                                                                                                                              | <a href="#">50</a>     |
|               |                  | <i>Neolitsea sericea</i>       | stem woods, leaves,            | <b>1-BIAs:</b> (1 <i>S</i> ,2 <i>S</i> )-reticuline <i>N</i> <sub>α</sub> -oxide, (1 <i>S</i> ,2 <i>R</i> )-reticuline <i>N</i> <sub>β</sub> -oxide, (1 <i>R</i> ,2 <i>R</i> )-juziphine <i>N</i> <sub>β</sub> -oxide, (+)-reticuline<br><b>Morphinans:</b> (9 <i>S</i> ,17 <i>S</i> )-pallidine <i>N</i> <sub>α</sub> -oxide<br><b>Aporphines:</b> (+)-boldine, laurotetanine, lauroitsine, (+)-isoboldine, (+)-actinodaphnine, (+)-corytuberine, (+)-norisocorydine, (6 <i>R</i> ,6 <i>aS</i> )-boldine <i>N</i> <sub>β</sub> -oxide, (6 <i>S</i> ,6 <i>aS</i> )- <i>N</i> -methyllaurotetanine <i>N</i> <sub>α</sub> -oxide, (6 <i>R</i> ,6 <i>aS</i> )- <i>N</i> -methyllaurotetanine <i>N</i> <sub>β</sub> -oxide | <a href="#">50</a>     |
|               |                  | <i>Neolitsea variabilima</i>   | barks                          | <b>Aporphines:</b> 1 <sub>L</sub> -hernovine, 1 <sub>L</sub> - <i>N</i> -methylhernovine, 1 <sub>L</sub> -nandigerine                                                                                                                                                                                                                                                                                                                                                                                                                                                                                                                                                                                                  | <a href="#">50</a>     |
| Hernandiaceae | <i>Hernandia</i> | <i>Hernandia cordigera</i>     | stem barks                     | <b>1-BIAs:</b> (+)-reticuline<br><b>Aporphines:</b> isocorydine, norisocorydine                                                                                                                                                                                                                                                                                                                                                                                                                                                                                                                                                                                                                                        | <a href="#">51</a>     |
|               |                  | <i>Hernandia nymphaeifolia</i> | root woods, trunk barks, roots | <b>1-BIAs:</b> (+)-reticuline<br><b>bisBIAs:</b> thalicarpine<br><b>Aporphines:</b> 3-hydroxyhernandonine, (+)- <i>N</i> -hydroxyhernangerine, <i>N</i> -formyldehydroovigerine, (+)-magnoflorine, (+)-hernovine, (+)- <i>N</i> -methylhernovine, (+)-laurotetanine, hernandonine                                                                                                                                                                                                                                                                                                                                                                                                                                      | <a href="#">52-54</a>  |
|               |                  | <i>Hernandia sonora</i>        | trunk barks, stem barks        | <b>bisBIAs:</b> (+)-malekulatine<br><b>Aporphines:</b> ovigerine, hernangerine, corytuberine, hernandonine, stepharine, oxonantenine, laurotetanine, nornantenine                                                                                                                                                                                                                                                                                                                                                                                                                                                                                                                                                      | <a href="#">55, 56</a> |
|               |                  | <i>Hernandia voyronii</i>      | stem barks                     | <b>1-BIAs:</b> (5)-reticuline, laudanosine<br><b>bisBIAs:</b> herveline A, herveline B, herveline C, herveline D<br><b>Morphinans:</b> ocobotrine, pallidine                                                                                                                                                                                                                                                                                                                                                                                                                                                                                                                                                           | <a href="#">57</a>     |

|               |                 |                             |                                                  |                                                                                                                                                                                                                                                                                                                                                               |                                                                                                                                                                     |                    |
|---------------|-----------------|-----------------------------|--------------------------------------------------|---------------------------------------------------------------------------------------------------------------------------------------------------------------------------------------------------------------------------------------------------------------------------------------------------------------------------------------------------------------|---------------------------------------------------------------------------------------------------------------------------------------------------------------------|--------------------|
| Hernandiaceae | <i>Illigera</i> | <i>Illigera aromatica</i>   | aerial parts                                     | <b>Aporphines:</b> laetanine, lindcarpine, norpredicentrine, norisocorydine                                                                                                                                                                                                                                                                                   | <a href="#">58</a>                                                                                                                                                  |                    |
|               |                 | <i>Illigera grandiflora</i> | roots                                            | <b>Aporphines:</b> laurodionine B, illigerine A, <i>N</i> -formyl-lauroilsine                                                                                                                                                                                                                                                                                 | <a href="#">59</a>                                                                                                                                                  |                    |
|               |                 | <i>Illigera luzonensis</i>  | roots, stems                                     | <b>Aporphines:</b> actinodaphnine, <i>N</i> -methylaurotetanine, boldine, lindcarpine, (+)-norbaldine                                                                                                                                                                                                                                                         | <a href="#">60, 61</a>                                                                                                                                              |                    |
| Monimiaceae   | <i>Peumus</i>   | <i>Illigera paviflora</i>   | roots                                            | <b>Aporphines:</b> (+)-( <i>S</i> )- <i>N</i> -butyrylcaaverine, (+)-( <i>S</i> )- <i>N</i> -propionylcaaverine, (+)-( <i>S</i> )- <i>N</i> -acetylcaaverine, (+)-( <i>S</i> )- <i>N</i> -acetylcaaverine, (+)-(6 <i>aR</i> ,7 <i>R</i> , <i>E</i> )- <i>N</i> -(but-2-enoyl)norushinsunine, <i>N</i> -formyldehydrocaaverine, illigeluzine A, illigeluzine B | <a href="#">62</a>                                                                                                                                                  |                    |
|               |                 | <i>Peumus boldus</i>        | leaves, barks                                    | <b>Aporphines:</b> stephanine<br><b>1-BIAs:</b> reticuline, coclaurine, laudanosine, laudanosoline                                                                                                                                                                                                                                                            | <a href="#">63</a>                                                                                                                                                  |                    |
| Siparunaceae  | <i>Siparuna</i> | <i>Siparuna apiosyce</i>    | leaves                                           | <b>Aporphines:</b> boldine, glaucine, isoboldine, bulbocapnine, anonaïne, apomorphine, <i>N</i> -methylglaucinium, <i>N</i> -methylboldinium, 6 <i>a</i> ,7-didehydroboldine                                                                                                                                                                                  | <a href="#">64</a>                                                                                                                                                  |                    |
|               |                 | <i>Siparuna pachyantha</i>  | leaves                                           | <b>1-BIAs:</b> reticuline                                                                                                                                                                                                                                                                                                                                     |                                                                                                                                                                     |                    |
|               |                 | <i>Siparuna guianensis</i>  | leaves                                           | <b>Aporphines:</b> liriodenine<br><b>Aporphines:</b> (+)-corydine, (-)-roemerine, liriodenine                                                                                                                                                                                                                                                                 | <a href="#">65</a>                                                                                                                                                  |                    |
|               |                 | <i>Siparuna poeppigii</i>   | leaves                                           | <b>Aporphines:</b> (+)-bulbocapnine, (+)- <i>N</i> -methylindcarpine, (+)-actinodaphnine, liriodenine, (+)-11-methoxynormoelistine                                                                                                                                                                                                                            | <a href="#">65</a>                                                                                                                                                  |                    |
|               |                 | <i>Siparuna decipiens</i>   | leaves                                           | <b>Aporphines:</b> lysicamine, (-)- <i>O</i> -methylisopiline, norruciferine, liriodenine                                                                                                                                                                                                                                                                     | <a href="#">65</a>                                                                                                                                                  |                    |
| Magnoliales   | Magnoliaceae    | <i>Michelia</i>             | <i>Michelia compressa</i> var. <i>lanyuensis</i> | leaves                                                                                                                                                                                                                                                                                                                                                        | <b>Aporphines:</b> boldine, norruciferine                                                                                                                           | <a href="#">66</a> |
|               | Magnoliaceae    | <i>Magnolia</i>             | <i>Magnolia coriacea</i>                         | twigs, leaves                                                                                                                                                                                                                                                                                                                                                 | <b>Aporphines:</b> (+)-glaucine <i>N</i> -oxide, <i>N</i> -methyl glaucine acetate, magnoflorine, pontevedrine, <i>O</i> -methylatheroline, 7-hydroxydehydroglaucin | <a href="#">67</a> |
|               |                 |                             | <i>Magnolia denudata</i>                         | -                                                                                                                                                                                                                                                                                                                                                             | <b>1-BIAs:</b> magnocurarine<br><b>Aporphines:</b> asimilobine, liriodenine, magnoflorine                                                                           | <a href="#">68</a> |

|              |                     |                                                  |                       |                                                                                                                                                                                                                                                                                                                                                                                                       |                       |
|--------------|---------------------|--------------------------------------------------|-----------------------|-------------------------------------------------------------------------------------------------------------------------------------------------------------------------------------------------------------------------------------------------------------------------------------------------------------------------------------------------------------------------------------------------------|-----------------------|
|              |                     | <i>Magnolia fuscata/ Michelia figo</i>           | leaves                | <b>bisBIAs:</b> magnolamine                                                                                                                                                                                                                                                                                                                                                                           | <a href="#">69</a>    |
|              |                     | <i>Magnolia grandiflora</i>                      | leaves                | <b>Aporphines:</b> magnoflorine, lanuginosine, liriodenine, anonaine                                                                                                                                                                                                                                                                                                                                  | <a href="#">70</a>    |
|              |                     | <i>Magnolia kachirachirai</i>                    | root barks            | <b>Aporphines:</b> kachirachiranine                                                                                                                                                                                                                                                                                                                                                                   | <a href="#">71</a>    |
|              |                     | <i>Houpoea officinalis/ Magnolia officinalis</i> | barks                 | <b>Aporphines:</b> magnoflorine                                                                                                                                                                                                                                                                                                                                                                       | <a href="#">72</a>    |
|              |                     | <i>Magnolia ovata</i>                            | trunk barks, leaves   | <b>Aporphines:</b> xylopine, <i>N</i> -acetylxylopine, liriodenine, lanuginosine                                                                                                                                                                                                                                                                                                                      | <a href="#">73</a>    |
| Magnoliaceae | <i>Liriodendron</i> | <i>Liriodendron chinense</i>                     | roots, barks, leaves  | <b>1-BIAs:</b> ( <i>S</i> )-norcoclaurine, ( <i>S</i> )-coclaurine, ( <i>S</i> )-reticuline<br><b>Aporphines:</b> norisoboldine, magnoflorine, boldine, <i>N</i> -nornuciferine, nuciferine, liriodenine, (-)-anonaine, (-)-norstephalagine                                                                                                                                                           | <a href="#">74-75</a> |
|              |                     | <i>Liriodendron tulipifera</i>                   | heartwood, roots      | <b>Aporphines:</b> oxoglaucine, liriodenine, asimilobine, norushinsunine, norglaucine, liriodenine, anonaine, oxoglaucine, tuliferoline                                                                                                                                                                                                                                                               | <a href="#">76-78</a> |
| Annonaceae   | <i>Annona</i>       | <i>Annona atemoya</i>                            | leaves, fruits, seeds | <b>Aporphines:</b> lysicamine, lanuginosine, roemerine, corydine                                                                                                                                                                                                                                                                                                                                      | <a href="#">79</a>    |
|              |                     | <i>Annona cherimolia</i>                         | roots                 | <b>Aporphines:</b> roemerine<br><b>BBRs:</b> corytenchine, isocoreximine                                                                                                                                                                                                                                                                                                                              | <a href="#">80-81</a> |
|              |                     | <i>Annona coriacea</i>                           | leaves, branches      | <b>Aporphines:</b> pukateine, anonaine, obovanine, norisocorydine, liriodenine                                                                                                                                                                                                                                                                                                                        | <a href="#">82</a>    |
|              |                     | <i>Annona crassiflora</i>                        | leaves                | <b>Aporphines:</b> anonaine, xylopine, litseglutine B, stephalagine<br><b>BBRs:</b> tetrahydropalmatrubine                                                                                                                                                                                                                                                                                            | <a href="#">83</a>    |
|              |                     | <i>Annona glabra</i>                             | stems                 | <b>1-BIAs:</b> (+)-reticuline<br><b>Aporphines:</b> ( <i>S</i> )-(+)- <i>N</i> -methylcorydine, ( <i>R</i> )-(-)-asimilobine, ( <i>R</i> )-(-)-actinodaphnine, ( <i>R</i> )-(-)-norushinsunine, ( <i>S</i> )-(+)-3-hydroxynornantennine, ( <i>R</i> )-(-)-3-hydroxynornuciferine, oxoaporphine<br><b>BBRs:</b> pseudocolumbamine, dehydrocorydalmine, dehydrocorytenchine, palmatine, pseudopalmatine | <a href="#">84</a>    |
|              |                     | <i>Annona hypoglauca</i>                         | stems                 | <b>Aporphines:</b> isoboldine, nornuciferine, actinodaphnine, anonaine                                                                                                                                                                                                                                                                                                                                | <a href="#">85</a>    |
|              |                     | <i>Annona leptopetala</i>                        | leaves                | <b>Aporphines:</b> laurotetanine, anonaine,                                                                                                                                                                                                                                                                                                                                                           | <a href="#">86</a>    |

|                            |                         |                                                                                                                                                                                                                                                                                                                                                       |                             |
|----------------------------|-------------------------|-------------------------------------------------------------------------------------------------------------------------------------------------------------------------------------------------------------------------------------------------------------------------------------------------------------------------------------------------------|-----------------------------|
|                            |                         | norannuradhapurine, normuciferine                                                                                                                                                                                                                                                                                                                     |                             |
|                            |                         | <b>BBRs:</b> corypalmine                                                                                                                                                                                                                                                                                                                              |                             |
| <i>Annona lutescens</i>    | roots, stems,<br>leaves | <b>Aporphines:</b> liriodenine                                                                                                                                                                                                                                                                                                                        | <a href="#">87</a>          |
| <i>Annona maricata</i>     | leaves                  | <b>1-BIAs:</b> ( <i>R</i> )-4'- <i>O</i> -methylcoclaurine, ( <i>R</i> )- <i>O</i> , <i>O</i> -dimethylcoclaurine                                                                                                                                                                                                                                     | <a href="#">88</a>          |
| <i>Annona mucosa</i>       | unripe fruits           | <b>Aporphines:</b> annonamine, ( <i>S</i> )-norcorydine, anonaine                                                                                                                                                                                                                                                                                     | <a href="#">89</a>          |
| <i>Annona purpurea</i>     | leaves                  | <b>Aporphines:</b> (-)-3-chlororomucosine A                                                                                                                                                                                                                                                                                                           | <a href="#">90, 91</a>      |
|                            |                         | <b>Aporphines:</b> norpurpureine, purpureine, (+)-predicentrine, (-)-glaucine, thalbaicalidine, oxopurpurein, oxonuciferine, oxoglaucine                                                                                                                                                                                                              |                             |
| <i>Annona salzmanii</i>    | barks                   | <b>1-BIAs:</b> reticuline, norcoclaurine, coclaurine, norjuziphine, <i>N</i> -methylcoclaurine, juziphine, magnococline, <i>O</i> -methylcoclaurine, norarmepavine, <i>O,O</i> -dimethylcoclaurine, <i>N,O</i> -dimethylcoclaurine, oblongine, norreticuline, <i>N,O</i> -dimethylcoclaurine <i>N</i> -oxide, tembetarine, reticuline <i>N</i> -oxide | <a href="#">92, 93</a>      |
|                            |                         | <b>Aporphines:</b> anonaine, laurelliptine, isoboldine, asimilobine, lirinidine, normuciferine, xylopine, isopiline, <i>N</i> -acetylasimilobine, laurelliptine, nordicentrine, stepharine                                                                                                                                                            |                             |
|                            |                         | <b>BBRs:</b> pessoine, stepholidine, tetrahydrocolumbamine, corydalmine                                                                                                                                                                                                                                                                               |                             |
| <i>Annona senegalensis</i> | leaves                  | <b>Aporphines:</b> (-)-roemerine                                                                                                                                                                                                                                                                                                                      | <a href="#">80</a>          |
| <i>Annona sericea</i>      | leaves                  | <b>1-BIAs:</b> ( <i>S</i> )-reticuline, ( <i>S</i> )- <i>N</i> -methylcoclaurine                                                                                                                                                                                                                                                                      | <a href="#">94</a>          |
|                            |                         | <b>Aporphines:</b> oxonuciferine, oxonantenine, normuciferine, normantenine, isoboldine, 3-hydroxynormuciferine                                                                                                                                                                                                                                       |                             |
| <i>Annona spinescens</i>   | trunk barks,<br>roots   | <b>BBRs:</b> pessoine, spinosine                                                                                                                                                                                                                                                                                                                      | <a href="#">95</a>          |
| <i>Annona squamosa</i>     | fruits,<br>stems, twigs | <b>1-BIAs:</b> reticuline, norreticuline, <i>N</i> -methylcoclaurine, <i>O</i> -methylarmepavine                                                                                                                                                                                                                                                      | <a href="#">96-98</a>       |
|                            |                         | <b>Aporphines:</b> isocorydine, liriodenine                                                                                                                                                                                                                                                                                                           |                             |
| <i>Annona muricata</i>     | leaves, fruits          | <b>1-BIAs:</b> reticuline, <i>N</i> -methylcoclaurine                                                                                                                                                                                                                                                                                                 | <a href="#">96, 99, 100</a> |
|                            |                         | <b>Aporphines:</b> annonamine, anonaine, ( <i>S</i> )-norcorydine,                                                                                                                                                                                                                                                                                    |                             |

|            |                      |                                 |                         |                                                                                                                                                                                                                   |                     |
|------------|----------------------|---------------------------------|-------------------------|-------------------------------------------------------------------------------------------------------------------------------------------------------------------------------------------------------------------|---------------------|
| Annonaceae | <i>Asimina</i>       | <i>Asimina parviflora</i>       | leaves,<br>stems, roots | (+)-xylopine, (+)-laurotetanine, (+)-norglaucine,<br>lanuginosine<br><b>1-BIAs:</b> coclaurine                                                                                                                    | <a href="#">101</a> |
|            |                      | <i>Asimina triloba</i>          | twigs                   | <b>Aporphines:</b> stepharine, magnoflorine, normuciferine,<br>norushinsunine, liriodenine<br><b>1-BIAs:</b> coclaurine                                                                                           | <a href="#">101</a> |
| Annonaceae | <i>Artabotrys</i>    | <i>Artabotrys hexapetalus</i>   | stems                   | <b>Aporphines:</b> anolobine, normuciferine, norushinsunine,<br>liriodenine, lysicamine, stepharine, magnoflorine,<br>isocorydine, normuciferine<br><b>1-BIAs:</b> hexapetaline A, hexapetaline B, (+)-reticuline | <a href="#">102</a> |
|            |                      | <i>Artabotrys maingayi</i>      | barks                   | <b>Aporphines:</b> norisocorydine, normuciferine, stepharine,<br>isocorydine, anonaine, roemerine, liriodenine,<br>atherospermidine, laureline, artabonatine B                                                    | <a href="#">103</a> |
|            |                      | <i>Artabotrys pilosus</i>       | stems,<br>leaves        | <b>Aporphines:</b> anonaine, normuciferine, atherospermidine,<br>liriodenine, lysicamine<br><b>BBRs:</b> discretamine                                                                                             | <a href="#">104</a> |
|            |                      | <i>Artabotrys spinosus</i>      | roots                   | <b>Aporphines:</b> (-)-anonaine, (-)- <i>N</i> -acetylanonaine                                                                                                                                                    | <a href="#">105</a> |
|            |                      | <i>Artabotrys thomsonii</i>     | liana                   | <b>bisBIAs:</b> artabotrysine, bidebiline A<br><b>Aporphines:</b> <i>O</i> -methylmoschatoline, artacinatine                                                                                                      | <a href="#">106</a> |
|            |                      | <i>Artabotrys uncinatus</i>     | roots, stems,<br>leaves | <b>bisBIAs:</b> artabotrysine<br><b>BBRs:</b> stepholidine, 8-oxodis-cretamine<br><b>bisBIAs:</b> artabonatine F, unonopsine                                                                                      | <a href="#">107</a> |
|            |                      | <i>Artabotrys zeylanicus</i>    | stem barks              | <b>Aporphines:</b> artabonatine C<br><b>Aporphines:</b> liriodenine, oxocrebaine, ouregidione,<br>oxobuxifoline, atherospermidine, <i>O</i> -methylmoschatoline,<br>dicentrinone                                  | <a href="#">108</a> |
| Annonaceae | <i>Bocageopsis</i>   | <i>Bocageopsis pleiosperma</i>  | leaves                  | <b>1-BIAs:</b> reticuline<br><b>Aporphines:</b> (+)-laurotetanine, (+)- <i>N</i> -<br>methylaurotetanine, isoboldine, anonaine, asimilobine,<br>stepharine                                                        | <a href="#">109</a> |
| Annonaceae | <i>Dasymaschalon</i> | <i>Dasymaschalon acuminatum</i> | leaves                  | <b>Aporphines:</b> 7-epi-duguetine                                                                                                                                                                                | <a href="#">110</a> |
|            |                      | <i>Dasymaschalon rostratum</i>  | stems                   | <b>Aporphines:</b> dasymaroine A, 3-methoxyxoputerine <i>N</i> -<br>oxide                                                                                                                                         | <a href="#">111</a> |

|            |                 |                                 |                  |                                                                                                                                                                                                                                                                                                                                                                                                            |                                           |
|------------|-----------------|---------------------------------|------------------|------------------------------------------------------------------------------------------------------------------------------------------------------------------------------------------------------------------------------------------------------------------------------------------------------------------------------------------------------------------------------------------------------------|-------------------------------------------|
| Annonaceae | <i>Duguetia</i> | <i>Dasymaschalon sootepense</i> | leaves,<br>twigs | <b>Aporphines:</b> 6a,7-dehydrodasymachaline, (-)-nordicentrine, dicentrinone<br><b>BBRs:</b> (-)-sinactine, epiberberine                                                                                                                                                                                                                                                                                  | <a href="#">112</a>                       |
|            |                 | <i>Duguetia calycina</i>        | -                | <b>Aporphines:</b> obovanine, puterine, calycinine, oxoputerine<br><b>BBRs:</b> (-)-discretamine, (-)-10-demethylxylopinine                                                                                                                                                                                                                                                                                | <a href="#">113</a>                       |
|            |                 | <i>Duguetia colombiana</i>      | -                | <b>Aporphines:</b> <i>O</i> -methylmoschatoline                                                                                                                                                                                                                                                                                                                                                            | <a href="#">113</a>                       |
|            |                 | <i>Duguetia confinis</i>        | -                | <b>BBRs:</b> tetrahydrojatrorrhizine, (-)-isocorypalmine, rotundine, (-)-siscetretine                                                                                                                                                                                                                                                                                                                      | <a href="#">113</a>                       |
|            |                 | <i>Duguetia eximia</i>          | -                | <b>Aporphines:</b> <i>O</i> -methylmoschatoline, oxopukateine, oxoputerine                                                                                                                                                                                                                                                                                                                                 | <a href="#">113</a>                       |
|            |                 | <i>Duguetia flagellaris</i>     | -                | <b>Aporphines:</b> nornuciferine, isopiline, <i>O</i> -methylisopiline, calycinine, duguevanine                                                                                                                                                                                                                                                                                                            | <a href="#">113</a>                       |
|            |                 | <i>Duguetia furfuracea</i>      | aerial parts     | <b>1-BIAs:</b> (+)-reticuline<br><b>bisBIAs:</b> isochondodendrine<br><b>Aporphines:</b> <i>N</i> -nitrosoanonaine, <i>N</i> -nitrosoxylopinine, asimilobine, anonaine, xylopinine, obovanine, <i>N</i> -methylglaucine, 8-nitroisocorydine, lirioidenine, atherospermidine, lanuginosine, norisocorydine, isocorydine<br><b>BBRs:</b> (-)-discretamine, <i>N</i> -methyltetrahydropalmatine, (-)-govanine | <a href="#">113</a> , <a href="#">114</a> |
|            |                 | <i>Duguetia gardneriana</i>     | -                | <b>Aporphines:</b> lanuginosine<br><b>BBRs:</b> (-)-discretamine, tetrahydrojatrorrhizine, rotundine                                                                                                                                                                                                                                                                                                       | <a href="#">113</a>                       |
|            |                 | <i>Duguetia glabriuscula</i>    | -                | <b>Aporphines:</b> oxobuxifoline                                                                                                                                                                                                                                                                                                                                                                           | <a href="#">113</a>                       |
|            |                 | <i>Duguetia lanceolata</i>      | stem barks       | <b>Aporphines:</b> <i>N</i> -methylpachypodanthine                                                                                                                                                                                                                                                                                                                                                         | <a href="#">115</a>                       |
|            |                 | <i>Duguetia magnolioidea</i>    | fruits           | <b>BBRs:</b> (-)-discretamine                                                                                                                                                                                                                                                                                                                                                                              | <a href="#">116</a>                       |
|            |                 | <i>Duguetia obovata</i>         | stem barks       | <b>Aporphines:</b> anolobine, isolareline, buxifoline, <i>N</i> -methylbuxifoline, calycinine, <i>N</i> -methylcalycinine, duguevanine, <i>N</i> -methyl-duguevanine, oxobuxifoline<br><b>BBRs:</b> (-)-discretamine, (-)-xylopinine, dehydrodiscretamine, pseudopalmatine                                                                                                                                 | <a href="#">113</a> , <a href="#">117</a> |
|            |                 | <i>Duguetia pycnastera</i>      | barks            | <b>1-BIAs:</b> (S)-reticuline                                                                                                                                                                                                                                                                                                                                                                              | <a href="#">118</a>                       |



|                   |                        |                                 |                                                  |  |                                                                                                                                                                                     |                                         |
|-------------------|------------------------|---------------------------------|--------------------------------------------------|--|-------------------------------------------------------------------------------------------------------------------------------------------------------------------------------------|-----------------------------------------|
|                   |                        |                                 |                                                  |  | <b>Aporphines:</b> <i>O</i> -methylmoschatoline, lysicamine, nornuciferidine, guatterine <i>N</i> -oxide                                                                            |                                         |
|                   |                        | <i>Duguetia staudtii</i>        | -                                                |  | <b>Aporphines:</b> liriodenine                                                                                                                                                      | <a href="#">113</a>                     |
|                   |                        | <i>Duguetia stelechantha</i>    | -                                                |  | <b>BBRs:</b> tetrahydrojatrorrhizine, (-)-isocorypalmine, (-)-discretine                                                                                                            |                                         |
|                   |                        | <i>Duguetia spixiana (b)</i>    | -                                                |  | <b>Aporphines:</b> <i>O</i> -methylmoschatoline, oxopukateine                                                                                                                       | <a href="#">113</a>                     |
|                   |                        |                                 |                                                  |  | <b>BBRs:</b> tetrahydrojatrorrhizine                                                                                                                                                |                                         |
|                   |                        |                                 |                                                  |  | <b>1-BIAs:</b> cis- <i>N</i> -oxycodamine                                                                                                                                           | <a href="#">113</a>                     |
|                   |                        |                                 |                                                  |  | <b>Aporphines:</b> lornuciferine, anonaine, 3-hydroxynornuciferine, <i>O</i> -methylisopiline, lysicamine, <i>O</i> -methylmoschatoline, lanuginosine, <i>N</i> -methylassimilobine |                                         |
|                   |                        | <i>Duguetia surinamensis</i>    | trunk barks                                      |  | <b>BBRs:</b> rotundine, (-)-xylopinine, (-)-spiduxine                                                                                                                               | <a href="#">119</a>                     |
|                   |                        |                                 |                                                  |  | <b>Aporphines:</b> dicentrine, 7-hydroxynordicentrine, (-)-duguetine, dicentrinone                                                                                                  |                                         |
|                   |                        | <i>Duguetia trunciflora</i>     | leaves, thin branches                            |  | <b>Morphinans:</b> pallidine                                                                                                                                                        | <a href="#">113</a> <a href="#">120</a> |
|                   |                        |                                 |                                                  |  | <b>1-BIAs:</b> (+)-reticuline                                                                                                                                                       |                                         |
|                   |                        |                                 |                                                  |  | <b>BBRs:</b> (-)-discretamine, rotundine, (-)-thaicanine, jatrorrhizine                                                                                                             |                                         |
|                   |                        | <i>Duguetia vallicola</i>       | leaves                                           |  | <b>Aporphines:</b> (-)-glaziovine, <i>N</i> -methyllaurotetanine, isoboldine, isocorydine, <i>O</i> -methylmoschatoline, duguevallin                                                | <a href="#">113</a> <a href="#">121</a> |
|                   |                        |                                 |                                                  |  | <b>BBRs:</b> (-)-discretine, (-)-xylopinine                                                                                                                                         |                                         |
| <i>Annonaceae</i> | <i>Enicosanthellum</i> | <i>Enicosanthellum pulchrum</i> | roots                                            |  | <b>Aporphines:</b> liriodenine                                                                                                                                                      | <a href="#">122</a>                     |
| <i>Annonaceae</i> | <i>Fissistigma</i>     | <i>Fissistigma poilanei</i>     | leaves, branches                                 |  | <b>Aporphines:</b> 8-hydroxy-9-methoxy-1,2-methylenedioxyaporphine, 8-hydroxy-3,9-dimethoxy-1,2-methylenedioxyaporphine, oxocrebaine, kuafumine                                     | <a href="#">123</a>                     |
| <i>Annonaceae</i> | <i>Goniothalamus</i>   | <i>Goniothalamus australis</i>  | leaves, woods, heartwoods, barks, inflorescences |  | <b>Aporphines:</b> (-)-anonaine, asimilobine                                                                                                                                        | <a href="#">124</a>                     |
|                   |                        | <i>Goniothalamus griffithii</i> | stems                                            |  | <b>Aporphines:</b> griffinin                                                                                                                                                        | <a href="#">125</a>                     |
|                   |                        | <i>Goniothalamus laoticus</i>   | flowers                                          |  | <b>Aporphines:</b> (-)-nordicentrine                                                                                                                                                | <a href="#">126</a>                     |

|                   |                  |                                 |                       |                                                                                                                                                                                                                                                                                                                                                                                                                                                                                                                                                                   |                         |
|-------------------|------------------|---------------------------------|-----------------------|-------------------------------------------------------------------------------------------------------------------------------------------------------------------------------------------------------------------------------------------------------------------------------------------------------------------------------------------------------------------------------------------------------------------------------------------------------------------------------------------------------------------------------------------------------------------|-------------------------|
| <i>Annonaceae</i> | <i>Guateeria</i> | <i>Guateeria amplifolia</i>     | leaves                | <b>1-BIAs:</b> laudanosine<br><b>Aporphines:</b> xylopine, normuciferine, lysicamine                                                                                                                                                                                                                                                                                                                                                                                                                                                                              | <a href="#">127</a>     |
|                   |                  | <i>Guateeria blepharophylla</i> | barks                 | <b>Aporphines:</b> isomoschaltoline, <i>O</i> -methylmoschatoline, liriodenine, subessiline, lysicamine, isocoreximine, normuciferine                                                                                                                                                                                                                                                                                                                                                                                                                             | <a href="#">128</a>     |
|                   |                  | <i>Guateeria boliviana</i>      | stem barks,<br>leaves | <b>bisBIAs:</b> puertogalines-A, puertogalines-B, (+)-guatteboline, philogaline, (-)-antioquine                                                                                                                                                                                                                                                                                                                                                                                                                                                                   | <a href="#">129</a>     |
|                   |                  | <i>Guateeria citriodora</i>     | stem barks            | <b>Aporphines:</b> liriodenina, lisicamina, <i>O</i> -metilmoschatolina, <i>O</i> -metilmoschatolina, 3-metoxioxoputerina, guattescidina, oxoputerina<br><b>BBRs:</b> palmatine                                                                                                                                                                                                                                                                                                                                                                                   | <a href="#">130</a>     |
|                   |                  | <i>Guateeria diospyroides</i>   | leaves                | <b>Aporphines:</b> (-)-isopiline, (-)-normuciferine, (-)-normuciferine, <i>O</i> -methyl-moschatoline                                                                                                                                                                                                                                                                                                                                                                                                                                                             | <a href="#">131</a>     |
|                   |                  | <i>Guateeria dumetorum</i>      | leaves                | <b>Aporphines:</b> cryptodorine, nornantenine                                                                                                                                                                                                                                                                                                                                                                                                                                                                                                                     | <a href="#">127</a>     |
|                   |                  | <i>Guateeria foliosa</i>        | stem barks,<br>roots  | <b>Aporphines:</b> (-)-3-methoxyputerine, (+)-norguattevaline, (+)-3-methoxyguatteidine, 3-methoxyoxoputerine                                                                                                                                                                                                                                                                                                                                                                                                                                                     | <a href="#">132</a>     |
|                   |                  | <i>Guateeria friesiana</i>      | barks,<br>leaves      | <b>Aporphines:</b> ( <i>R</i> )-dihydroguatteriscine, guatterfriesidine, iso-9-methoxyguatterfriesine, 7-hydroxyguatteriopticine, 3-methoxy-demethoxyguadiscine, guatteriscine, 9-methoxyguatteriscine, 3-methoxyguadiscine, guatterfriesine, 9-hydroxyguatterfriesine, 4,5-dehydro-9-methoxyguatterfriesine, ( <i>R</i> )-6,6a-dihydro-9-methoxyguatterfriesine, ( <i>R</i> )-4,5,6,6a-tetrahydromelosmidine, 9-demethoxyisoguattouregine<br><b>BBRs:</b> 13-hydroxy-discretinine, 13-hydroxy-2,3,9,10-tetramethoxyprotoberberine, 8-hydroxypalmatine, palmatine | <a href="#">133-135</a> |
|                   |                  | <i>Guateeria gaumeri</i>        | barks                 | <b>bisBIAs:</b> guattegaumerine                                                                                                                                                                                                                                                                                                                                                                                                                                                                                                                                   | <a href="#">136</a>     |
|                   |                  | <i>Guateeria latifolia</i>      | aerial parts          | <b>Aporphines:</b> normuciferine, lysicamine, isomoschaltoline                                                                                                                                                                                                                                                                                                                                                                                                                                                                                                    | <a href="#">137</a>     |
|                   |                  | <i>Guateeria pogonopus</i>      | stem barks            | <b>Aporphines:</b> puterine, anonaine, isopiline, <i>O</i> -methylisopiline, launobine, normuciferine, obovanine, xylopine, liriodenine, lanuginosine, oxoputerine                                                                                                                                                                                                                                                                                                                                                                                                | <a href="#">138</a>     |

|            |                      |                              |                           |                                                                                                                                                                                           |                                         |
|------------|----------------------|------------------------------|---------------------------|-------------------------------------------------------------------------------------------------------------------------------------------------------------------------------------------|-----------------------------------------|
|            |                      | <i>Guatteria sellowiana</i>  | aerial parts              | <b>Aporphines:</b> <i>O</i> -metilmoschatoline                                                                                                                                            | <a href="#">137</a>                     |
|            |                      | <i>Guatteria stenopetala</i> | -                         | <b>Aporphines:</b> dicentrinone, <i>N</i> -methyl dicentrinone, 4,5-dioxodehydrodicentrine                                                                                                | <a href="#">139</a>                     |
| Annonaceae | <i>Phoenicanthus</i> | <i>Phoenicanthus obliqua</i> | stem barks                | <b>Aporphines:</b> 7,7'-bis(dehydro- <i>O</i> -methylisopiline), 7-dehydronuciferyl-7'-dehydro- <i>O</i> -methylisopiline, urabaine                                                       | <a href="#">140</a>                     |
| Annonaceae | <i>Polyalthia</i>    | <i>Polyalthia longifolia</i> | stems, stem barks         | <b>Aporphines:</b> liriodenine, noroliveroline, oliveroline- $\beta$ - <i>N</i> -oxide                                                                                                    | <a href="#">141</a>                     |
| Annonaceae | <i>Pseuduvaria</i>   | <i>Pseuduvaria fragrans</i>  | leaves                    | <b>Aporphines:</b> (+)-isocorydine                                                                                                                                                        | <a href="#">142</a>                     |
|            |                      | <i>Pseuduvaria rugosa</i>    | leaves, twigs             | <b>Aporphines:</b> 1,2,3-trimethoxy-5-oxonoraporphine, ouregidione                                                                                                                        | <a href="#">143</a>                     |
|            |                      | <i>Pseuduvaria trimera</i>   | leaves                    | <b>Aporphines:</b> 8-hydroxyartabonatinine, ouregidione                                                                                                                                   | <a href="#">144</a>                     |
| Annonaceae | <i>Unonopsis</i>     | <i>Unonopsis buchtienii</i>  | stem barks                | <b>Aporphines:</b> liriodenine                                                                                                                                                            | <a href="#">145</a>                     |
|            |                      | <i>Unonopsis duckei</i>      | stem barks, twigs, leaves | <b>Aporphines:</b> anonaine, normuciferine, asimilobine, glaucine, liriodenine, lysicamine, glaziovine                                                                                    | <a href="#">146</a>                     |
|            |                      | <i>Unonopsis floribunda</i>  | trunk barks               | <b>Morphinans:</b> pallidine<br><b>Aporphines:</b> anonaine, normuciferine, asimilobine, isopiline, <i>O</i> -methylisopiline, liriodenine, norushinsunine, lanuginosine                  | <a href="#">147</a>                     |
|            |                      | <i>Unonopsis stipitata</i>   | leaves                    | <b>1-BIAs:</b> reticuline<br><b>Aporphines:</b> (+)- <i>N</i> -formylnorglucine, stepharine, norisocorydine, glaucine, norglucine, nantenine                                              | <a href="#">148</a> <a href="#">149</a> |
| Annonaceae | <i>Xylopi</i>        | <i>Xylopi aethiopica</i>     | fruits                    | <b>Aporphines:</b> liriodenine, oxonantenine, lysicamine, lanuginosine, atherospermidine, <i>N</i> -formyllaurotetanine, <i>N</i> -acetyl laurotetanine, <i>N</i> -acetyl nor domesticine | <a href="#">150</a>                     |
|            |                      | <i>Xylopi benthamii</i>      | barks                     | <b>Aporphines:</b> nornantenine, laurotetanine                                                                                                                                            | <a href="#">151</a>                     |
|            |                      | <i>Xylopi championii</i>     | stem barks                | <b>Aporphines:</b> <i>O</i> -methylmoschatoline, artabotrine, atherospermidine, dicentrinone                                                                                              | <a href="#">108</a>                     |
|            |                      | <i>Xylopi columbiana</i>     | fruits                    | <b>bisBIAs:</b> (-)-medelline, (+)-antioquine, (+)-aromoline, (+)-obamegine                                                                                                               | <a href="#">152</a>                     |
|            |                      | <i>Xylopi laevigata</i>      | stems                     | <b>1-BIAs:</b> (+)-reticuline<br><b>Morphinans:</b> (+)-flavinantine<br><b>Aporphines:</b> (-)-roemerine, (+)-anonaine, (+)-glaucine,                                                     | <a href="#">153</a>                     |

|              |               |                   |                                   |                     |                                                                                                                                                                                                                                                                                                                |                          |
|--------------|---------------|-------------------|-----------------------------------|---------------------|----------------------------------------------------------------------------------------------------------------------------------------------------------------------------------------------------------------------------------------------------------------------------------------------------------------|--------------------------|
|              |               |                   |                                   |                     | (+)-xylopine, (+)-norglaucine, asimilobine, (+)-norpurpureine, (+)- <i>N</i> -methyllaurotetanine, (+)-norpredicentrine, (+)-calycinine, (+)-laurotetanine, lanuginosine, oxoglaucine<br><b>BBRs:</b> (-)-xylopinine, (+)-discretine, (-)-corytenchine, (+)-discretamine<br><b>Aporphines:</b> (-)-xylopine    | <a href="#">154</a>      |
|              |               |                   | <i>Xylopia nitida</i>             | roots               |                                                                                                                                                                                                                                                                                                                | <a href="#">155</a>      |
|              |               |                   | <i>Xylopia sericea</i>            | leaves              | <b>Aporphines:</b> liriodenine                                                                                                                                                                                                                                                                                 | <a href="#">156</a>      |
|              |               |                   | <i>Xylopia vielana</i>            | roots               | <b>Aporphines:</b> xylopioloids A, xylopioloids B, xylopioloids C, fibrecisine, <i>O</i> -methylliridinine, cheline B<br><b>Aporphines:</b> <i>N,O</i> -diacetyl(-)-normuciferidine, <i>N,O</i> -diacetylnoroliveroline                                                                                        | <a href="#">157</a>      |
| Alismatales  | Araceae       | <i>Lysichiton</i> | <i>Lysichiton camtschaticense</i> | rhizomes            | <b>Aporphines:</b> acoapetalidines B, acoapetalidines C<br><b>1-BIAs:</b> <i>O</i> -methyllumepavine                                                                                                                                                                                                           | <a href="#">158</a>      |
| Ranunculales | Ranunculaceae | <i>Aconitum</i>   | <i>Aconitum apetalum</i>          | whole plant         | <b>Aporphines:</b> (+)- <i>N</i> -methyllaurotetanine, magnoflorine                                                                                                                                                                                                                                            | <a href="#">160, 161</a> |
|              |               |                   | <i>Aconitum barbatum</i>          | whole plant         | <b>Aporphines:</b> <i>N</i> -formyllaurotetanine, oxoglaucine, oxoglaucidaline, 6-formyl-1,2,9,10-tetramethoxy-6a,7-dehydroaporphine, glaucine<br><b>1-BIAs:</b> (±)-higenamine                                                                                                                                | <a href="#">162</a>      |
|              |               |                   | <i>Aconitum carnichaelii</i>      | aerial parts        | <b>Aporphines:</b> glaucine, <i>N</i> -methyllaurotetanine, isoboldine<br><b>Aporphines:</b> <i>N</i> -methyllaurotetanine, isoboldine                                                                                                                                                                         | <a href="#">163</a>      |
|              |               |                   | <i>Aconitum japonicum</i>         | tubers              |                                                                                                                                                                                                                                                                                                                | <a href="#">164</a>      |
|              |               |                   | <i>Aconitum neosachalinense</i>   | leaves              |                                                                                                                                                                                                                                                                                                                | <a href="#">165</a>      |
|              |               |                   | <i>Aconitum sanyoense</i>         | roots, aerial parts |                                                                                                                                                                                                                                                                                                                | <a href="#">166</a>      |
|              | Ranunculaceae | <i>Aquilegia</i>  | <i>Aquilegia hybrids</i>          | whole plants        | <b>Aporphines:</b> magnoflorine<br><b>BBRs:</b> berberine                                                                                                                                                                                                                                                      | <a href="#">167</a>      |
|              |               |                   | <i>Aquilegia formosa</i>          | roots               | <b>Aporphines:</b> magnoflorine<br><b>BBRs:</b> berberine                                                                                                                                                                                                                                                      | <a href="#">167</a>      |
|              | Ranunculaceae | <i>Actaea</i>     | <i>Actaea racemosa</i>            | roots, rhizomes     | <b>1-BIAs:</b> norcoclaurine, reticuline, magnocurarine, oblongine<br><b>Aporphines:</b> magnoflorine, laurifoline, laurilitsine, menisperine, laurotetanine, xanthoplanine<br><b>BBRs:</b> phellodendrine, cyclanoline, <i>N</i> -methyltetrahydrocolumbamine<br><b>Protamines:</b> protopine, allocryptopine |                          |

|               |                   |                                |              |                                                                                                                                                                                                                                                                                                                                                                                                                                                                                                  |                          |
|---------------|-------------------|--------------------------------|--------------|--------------------------------------------------------------------------------------------------------------------------------------------------------------------------------------------------------------------------------------------------------------------------------------------------------------------------------------------------------------------------------------------------------------------------------------------------------------------------------------------------|--------------------------|
| Ranunculaceae | <i>Adonis</i>     | <i>Adonis coerulea</i>         | aerial parts | <b>Aporphines:</b> magnoflorine                                                                                                                                                                                                                                                                                                                                                                                                                                                                  | <a href="#">168</a>      |
| Ranunculaceae | <i>Clematis</i>   | <i>Clematis parviloba</i>      | aerial parts | <b>Aporphines:</b> magnoflorine                                                                                                                                                                                                                                                                                                                                                                                                                                                                  | <a href="#">169</a>      |
| Ranunculaceae | <i>Consolida</i>  | <i>Consolida hellespontica</i> | aerial parts | <b>Aporphines:</b> (+)-corydine                                                                                                                                                                                                                                                                                                                                                                                                                                                                  | <a href="#">170</a>      |
| Ranunculaceae | <i>Coptis</i>     | <i>Coptis chinensis</i>        | rhizomes     | <b>1-BIAs:</b> berbithine, coptisine A, coptisine B, coptisine C<br><b>BBRs:</b> berberine, jatrohizine, epiberberine, coptisine, palmatine, 5-hydroxyl-8-oxyberberine, 8,13-dioxocoptisine hydroxide, 8-oxyberberine, 8-oxo-epiberberine, 8-oxocoptisine, 8-oxyberberrubine, tetrahydroberberine, corydaline                                                                                                                                                                                    | <a href="#">171</a>      |
|               |                   | <i>Coptis japonica</i>         | roots        | <b>BBRs:</b> berberine, jatrohizine, epiberberine, 8-hydroxy-7, 8-dihydrocoptisine palmatine                                                                                                                                                                                                                                                                                                                                                                                                     | <a href="#">172, 173</a> |
|               |                   | <i>Coptis teeta</i>            | rhizome      | <b>Aporphines:</b> magnoflorine<br><b>Aporphines:</b> palmatine                                                                                                                                                                                                                                                                                                                                                                                                                                  | <a href="#">174</a>      |
| Ranunculaceae | <i>Hydrastis</i>  | <i>Hydrastis canadensis</i>    | -            | <b>BBRs:</b> jatrorrhizine, berberine<br><b>Berberine:</b> berberine<br><b>PQs:</b> (-)- $\beta$ -hydrastine, (-)-hydrastidine, (-)-isohydrastidine, (-)- $\alpha$ -hydrastine                                                                                                                                                                                                                                                                                                                   | <a href="#">175-177</a>  |
| Ranunculaceae | <i>Nigella</i>    | <i>Nigella glandulifera</i>    | seeds        | <b>Aporphines:</b> fuzitine                                                                                                                                                                                                                                                                                                                                                                                                                                                                      | <a href="#">178</a>      |
| Ranunculaceae | <i>Ranunculus</i> | <i>Ranunculus japonicus</i>    | whole plant  | <b>BBRs:</b> berberine                                                                                                                                                                                                                                                                                                                                                                                                                                                                           | <a href="#">179</a>      |
| Ranunculaceae | <i>Thalictrum</i> | <i>Thalictrum cirrhosum</i>    | whole plant  | <b>1-BIAs:</b> laudanosine, pseudolaudanine, rugosinone<br><b>Morphinans:</b> <i>O</i> -methylflavinantine<br><b>Aporphines:</b> 6a <i>R</i> -2'-methoxycarbonyl-thaliadin, 6a <i>R</i> -2'-carboxyl-thaliadin, 6a <i>R</i> -3-methoxy-hermandalinol, 6a <i>S</i> -1,3,10-trimethoxy-natalamine, 3-methoxy-2'-methoxycarbonyl-oxohermandalincin, thaliadine, predicentrine, <i>N</i> -methyllaurotetanine, 3-methoxy-oxohermandaline, oxopurpureine, oxophoebine, dihydroglaziovine, linearisine | <a href="#">180</a>      |
|               |                   | <i>Thalictrum cultratum</i>    | roots        | <b>bisBIAs:</b> thalidasine                                                                                                                                                                                                                                                                                                                                                                                                                                                                      | <a href="#">181</a>      |
|               |                   | <i>Thalictrum dasycarpum</i>   | roots        | <b>bisBIAs:</b> thalicarpine                                                                                                                                                                                                                                                                                                                                                                                                                                                                     | <a href="#">182</a>      |
|               |                   | <i>Thalictrum faberi</i>       | roots        | <b>bisBIAs:</b> 5'-hydroxythalfaboramine, 3-hydroxythalfaboramine, 3-hydroxy-6'-desmethyl-9- <i>O</i> -methylthalfaboramine, 6'-desmethylthalfaboramine,                                                                                                                                                                                                                                                                                                                                         | <a href="#">183</a>      |

|                |                  |                                                             |                             |                                                                                                                                                                                                                                                               |                          |
|----------------|------------------|-------------------------------------------------------------|-----------------------------|---------------------------------------------------------------------------------------------------------------------------------------------------------------------------------------------------------------------------------------------------------------|--------------------------|
|                |                  |                                                             |                             | 3,5'-dihydroxythalifaboramine, 3-hydroxy-6'-desmethylthalifaboramine                                                                                                                                                                                          |                          |
|                |                  | <i>Thalictrum flavum</i>                                    | roots                       | <b>bisBIAs:</b> hernandezine<br><b>BBRs:</b> berberine                                                                                                                                                                                                        | <a href="#">184</a>      |
|                |                  | <i>Thalictrum foliolosum</i>                                | whole plant, stems          | <b>1-BIAs:</b> thalfoliolosumines A, thalfoliolosumines B<br><b>bisBIAs:</b> thalrigosidine, thalrugosaminine, thalirugidine, thalirugine<br><b>BBRs:</b> berberine, palmatine, jatrorrhizine                                                                 | <a href="#">185, 186</a> |
|                |                  | <i>Thalictrum minus</i>                                     | aerial parts, roots         | <b>bisBIAs:</b> thalidasine, thalfoetidine, isothalidezine, oxyacanthine, homoaromoline, thallicarpine<br><b>BBRs:</b> berberine, palmatine                                                                                                                   | <a href="#">187</a>      |
|                |                  | <i>Thalictrum simplex</i>                                   | aerial parts                | <b>Pavines:</b> (-)-2-demethylthlimonine, (-)-9-demethylthlimonine, (-)-thlimonine                                                                                                                                                                            | <a href="#">188, 189</a> |
|                |                  | <i>Thalictrum wangii</i>                                    | whole plants, roots         | <b>bisBIAs:</b> (-)-thalibealine<br><b>Aporphines:</b> (+)-magnoflorine, prodensiflorin B, thalidine<br><b>BBRs:</b> berberine                                                                                                                                | <a href="#">190, 191</a> |
| Menispermaceae | <i>Tiliacora</i> | <i>Tiliacora funifera</i>                                   | roots                       | <b>bisBIAs:</b> funiferine <i>N</i> -oxide                                                                                                                                                                                                                    | <a href="#">192</a>      |
|                |                  | <i>Tiliacora racemose</i><br>( <i>Tiliacora acuminata</i> ) | fruits                      | <b>bisBIAs:</b> tiliamine, nordinklacorine                                                                                                                                                                                                                    | <a href="#">193</a>      |
| Berberidaceae  | <i>Berberis</i>  | <i>Berberis actinacantha</i>                                | roots                       | <b>1-BIAs:</b> berbithine, dihydrotaxilamine<br><b>bisBIAs:</b> (-)-calafatine, (-)-osornine<br><b>Aporphines:</b> (+)-glaucine, (+)-corydine, (+)- <i>N</i> -methyllaurotetanine, (+)-boldine<br><b>BBRs:</b> berberine<br><b>Pavines:</b> (-)-norargemonine | <a href="#">194</a>      |
|                |                  | <i>Berberis amurensis</i>                                   | leaves                      | <b>bisBIAs:</b> berbamine<br><b>BBRs:</b> berberine                                                                                                                                                                                                           | <a href="#">195</a>      |
|                |                  | <i>Berberis aristata</i>                                    | roots, fruits, stems, barks | <b>bisBIAs:</b> berbamine<br><b>Aporphines:</b> magnoflorine<br><b>BBRs:</b> berberine, palmatine, jatrorrhizine                                                                                                                                              | <a href="#">196</a>      |
|                |                  | <i>Berberis boliviana</i>                                   | -                           | <b>bisBIAs:</b> isotetrandrine                                                                                                                                                                                                                                | <a href="#">181</a>      |
|                |                  | <i>Berberis brevissima</i>                                  | roots                       | <b>bisBIAs:</b> 13-nitrochondrofoline, chondrofoline, curine                                                                                                                                                                                                  | <a href="#">197</a>      |
|                |                  | <i>Berberis chilensis</i>                                   | -                           | <b>bisBIAs:</b> 7- <i>O</i> -demethylisothalicerbine                                                                                                                                                                                                          | <a href="#">198</a>      |

|               |                     |                              |                                    |                                                                                                                                                                                                                             |                                           |
|---------------|---------------------|------------------------------|------------------------------------|-----------------------------------------------------------------------------------------------------------------------------------------------------------------------------------------------------------------------------|-------------------------------------------|
|               |                     | <i>Berberis coletioides</i>  | whole plant                        | <b>Aporphines:</b> pronuciferine                                                                                                                                                                                            | <a href="#">199</a>                       |
|               |                     | <i>Berberis glaucocarpa</i>  | roots                              | <b>bisBIAs:</b> chondrofolinol<br><b>BBRs:</b> berberine, palmatine                                                                                                                                                         | <a href="#">200</a>                       |
|               |                     | <i>Berberis integerrima</i>  | roots                              | <b>BBRs:</b> berberine, columbamine, palmatine, jatrorrhizine                                                                                                                                                               | <a href="#">201</a>                       |
|               |                     | <i>Berberis kansuensis</i>   | stem barks                         | <b>Aporphines:</b> magnoflorine<br><b>BBRs:</b> berberine, jatrorrhizine                                                                                                                                                    | <a href="#">202</a>                       |
|               |                     | <i>Berberis laurina</i>      | stems                              | <b>BBRs:</b> berberine<br><b>PQs:</b> ( $\pm$ )- $\beta$ -hydrastine                                                                                                                                                        | <a href="#">203</a> , <a href="#">204</a> |
|               |                     | <i>Berberis microphylla</i>  | leaves,<br>stems, roots            | <b>1-BIAs:</b> reticuline<br><b>Aporphines:</b> isocorydine<br><b>BBRs:</b> jatrorrhizine, palmatine, scoulerine, tetrahydroberberine                                                                                       | <a href="#">205</a>                       |
|               |                     | <i>Berberis poiretii</i>     | -                                  | <b>bisBIAs:</b> berbamine                                                                                                                                                                                                   | <a href="#">206</a>                       |
|               |                     | <i>Berberis petiolaris</i>   | fruits,<br>leaves,<br>roots, stems | <b>1-BIAs:</b> reticuline, oblongine<br><b>Aporphines:</b> magnoflorine, isoboldine, menisperine, isocorydine<br><b>BBRs:</b> palmatine, berberine, thalifendine<br><b>Protopynes:</b> allocryptopine                       | <a href="#">207</a>                       |
|               |                     | <i>Berberis sibirica</i>     | aerial parts,<br>roots             | <b>1-BIAs:</b> (+)-armepavine<br><b>bisBIAs:</b> (-)-isothalidezine<br><b>Aporphines:</b> (+)-glaziovine<br><b>BBRs:</b> (-)-tetrahydropseudocoptisine<br><b>Protopyne:</b> pseudoprotopine<br><b>BZPs:</b> (+)-chelidonine | <a href="#">208</a>                       |
|               |                     | <i>Berberis tabiensis</i>    | stems                              | <b>bisBIAs:</b> tabienine B                                                                                                                                                                                                 | <a href="#">209</a>                       |
|               |                     | <i>Berberis thunbergii</i>   | leaves                             | <b>bisBIAs:</b> berbamine<br><b>BBRs:</b> berberine                                                                                                                                                                         | <a href="#">195</a>                       |
|               |                     | <i>Berberis virgetorum</i>   | whole plant                        | <b>1-BIAs:</b> (-)-berbervirine<br><b>BBRs:</b> berberine, jatrorrhizine                                                                                                                                                    | <a href="#">210</a>                       |
|               |                     | <i>Berberis vulgaris</i>     | root barks                         | <b>bisBIAs:</b> berbamine, isotetrandrine, oxyacanthine, obaberine, aromoline, obamegine, thaligrisine<br><b>Aporphines:</b> magnoflorine<br><b>BBRs:</b> berberine, jatrorrhizine, palmatine                               | <a href="#">211</a>                       |
| Berberidaceae | <i>Caulophyllum</i> | <i>Caulophyllum robustum</i> | leaves,                            | <b>BBRs:</b> berberine                                                                                                                                                                                                      | <a href="#">212</a>                       |

|                |                    |                                                            |                         |                                                                                                                                                                                                                                                                                                                                     |  |                          |
|----------------|--------------------|------------------------------------------------------------|-------------------------|-------------------------------------------------------------------------------------------------------------------------------------------------------------------------------------------------------------------------------------------------------------------------------------------------------------------------------------|--|--------------------------|
|                |                    |                                                            | stems, roots,<br>fruits |                                                                                                                                                                                                                                                                                                                                     |  |                          |
|                |                    | <i>Caulophyllum thalictroides</i>                          | roots                   | <b>Aporphines:</b> magnoflorine                                                                                                                                                                                                                                                                                                     |  | <a href="#">213</a>      |
| Berberidaceae  | <i>Epimedium</i>   | <i>Epimedium alpinum</i>                                   | underground<br>parts    | <b>Aporphines:</b> magnoflorine                                                                                                                                                                                                                                                                                                     |  | <a href="#">214</a>      |
|                |                    | <i>Epimedium koreanum</i>                                  | leaves                  | <b>Aporphines:</b> epimediphine                                                                                                                                                                                                                                                                                                     |  | <a href="#">215</a>      |
|                |                    | <i>Epimedium sagittatum</i>                                | leaves                  | <b>BBRs:</b> berberine, coptisine                                                                                                                                                                                                                                                                                                   |  | <a href="#">216</a>      |
| Berberidaceae  | <i>Jeffersonia</i> | <i>Jeffersonia dubia</i><br>( <i>Plagiorhegma dubium</i> ) | -                       | <b>BBRs:</b> berberine                                                                                                                                                                                                                                                                                                              |  | <a href="#">217</a>      |
| Berberidaceae  | <i>Mahonia</i>     | <i>Mahonia aquifolium</i>                                  | roots, leaves           | <b>bisBIAs:</b> berbamine<br><b>Aporphines:</b> magnoflorine, corytuberine<br><b>BBRs:</b> berberine, oxyberberine, jatrorrhizine,<br>columbamine                                                                                                                                                                                   |  | <a href="#">218, 219</a> |
|                |                    | <i>Mahonia bealei</i>                                      | roots, stems,<br>leaves | <b>BBRs:</b> columbamine, jatrorrhizine, berberine, palmatine                                                                                                                                                                                                                                                                       |  | <a href="#">220</a>      |
| Berberidaceae  | <i>Nandina</i>     | <i>Nandina domestica</i>                                   | fruits                  | <b>1-BIAs:</b> higenamine<br><b>Aporphines:</b> <i>O</i> -methylbulbocapnine, nantenine,<br>dehydronantenine, glaucine, didehydroglaucine,<br>magnoflorine, nornantenine, isocorydine, <i>N</i> -methyl-<br>laurotetanine<br><b>BBRs:</b> berberine, dehydrocorydaline, palmatine,<br>jatrorrhizine<br><b>Protopines:</b> protopine |  | <a href="#">221-223</a>  |
|                |                    | <i>Anisocycla cymosa</i>                                   | roots                   | <b>bisBIAs:</b> trilobine                                                                                                                                                                                                                                                                                                           |  | <a href="#">224</a>      |
| Menispermaceae | <i>Anisocycla</i>  | <i>Anisocycla grandidieri</i>                              | stems                   | <b>bisBIAs:</b> trilobine, stebisimine, (-)-epistephanine,<br>puetogaline B                                                                                                                                                                                                                                                         |  | <a href="#">225</a>      |
|                |                    | <i>Anisocycla jollyana</i>                                 | leaves                  | <b>bisBIAs:</b> isotrilobine, (+)-limacusine-2'- $\beta$ - <i>N</i> -oxide                                                                                                                                                                                                                                                          |  | <a href="#">226</a>      |
| Menispermaceae | <i>Albertisia</i>  | <i>Albertisia delagoensis</i>                              | leaves                  | <b>Aporphines:</b> roemrefidine                                                                                                                                                                                                                                                                                                     |  | <a href="#">227</a>      |
|                |                    | <i>Albertisia villosa</i>                                  | root bark               | <b>bisBIAs:</b> cycleanine, cocsoline, <i>N</i> -desmethylecycleanine                                                                                                                                                                                                                                                               |  | <a href="#">228</a>      |
| Menispermaceae | <i>Cissampelos</i> | <i>Cissampelos capensis</i>                                | aerial parts,<br>leaves | <b>bisBIAs:</b> cycleanine, insularine, cissacapine<br><b>Morphinans:</b> salutaridine<br><b>Aporphines:</b> (S)-dicentrine, (S)-neolitsine,<br>bulbocapnine, dicentrine                                                                                                                                                            |  | <a href="#">229, 230</a> |



|                |                    |                                |                                          |                                                                                                                                                                                                                                                                                                                                          |                          |
|----------------|--------------------|--------------------------------|------------------------------------------|------------------------------------------------------------------------------------------------------------------------------------------------------------------------------------------------------------------------------------------------------------------------------------------------------------------------------------------|--------------------------|
|                |                    | <i>Cissampelos fasciculata</i> | aerial parts                             | <b>bisBIAs:</b> cissampentin<br><b>Aporphines:</b> corydine                                                                                                                                                                                                                                                                              | <a href="#">230</a>      |
|                |                    | <i>Cissampelos glaberrima</i>  | stems,<br>leaves                         | <b>Aporphines:</b> cissaglaberrimine, magnoflorine, (+)-cissaglaberrimine                                                                                                                                                                                                                                                                | <a href="#">230</a>      |
|                |                    | <i>Cissampelos mucronata</i>   | leaves,<br>rhizomes                      | <b>1-BIAs:</b> reticuline<br><b>bisBIAs:</b> <i>l</i> -isochondodendrine<br><b>Morphinans:</b> salutaridine<br><b>Aporphines:</b> dicentrine, pronuciferine                                                                                                                                                                              | <a href="#">230</a>      |
|                |                    | <i>Cissampelos ovalifolia</i>  | rhizomes                                 | <b>1-BIAs:</b> (5)-6-methoxyjuziphine<br><b>bisBIAs:</b> warifteine, methylwarifteine, dimethylwarifteine                                                                                                                                                                                                                                | <a href="#">230</a>      |
|                |                    | <i>Cissampelos pareira</i>     | root bark,<br>vines,<br>leaves,<br>stems | <b>1-BIAs:</b> laudanosine<br><b>bisBIAs:</b> curine, <i>l</i> -curine, fangchinoline, pelosine, hayatidine, hayatine, (+)-isochondodendrine, sepeerine<br><b>Aporphines:</b> nuciferine, corytuberine, magniflorine, bulbocarpine                                                                                                       | <a href="#">230-232</a>  |
|                |                    | <i>Cissampelos sympodialis</i> | leaves, roots                            | <b>BBRs:</b> cissamine, berberine<br><b>bisBIAs:</b> warifteine, methylwarifteine, warifteine, roraimine<br><b>Morphinans:</b> milonine<br><b>Aporphines:</b> laurifoline                                                                                                                                                                | <a href="#">230, 233</a> |
| Menispermaceae | <i>Cocculus</i>    | <i>Cocculus orbiculatus</i>    | stems                                    | <b>bisBIAs:</b> (+)-coccuorbiculatine A, (+)-10-hydroxyisotrilobine<br><b>Aporphines:</b> (+)-laurelliptinhexadecan-1-one, (+)-laurelliptinoctadecan-1-one                                                                                                                                                                               | <a href="#">234</a>      |
| Menispermaceae | <i>Cyclea</i>      | <i>Cyclea barbata</i>          | roots                                    | <b>BBRs:</b> (-)-4-methoxy-13,14-dihydrooxypalmatine<br><b>1-BIAs:</b> (+)-cocclaurine, (-)- <i>N</i> -methylcocclaurine<br><b>bisBIAs:</b> tetrandrine, (-)-2'-norlimacine, (-)-curine, (+)-cycleabarbatine, (+)-berbamine, (-)-repandine, (+)-cycleanorine, (+)-daphnandrine<br><b>BBRs:</b> $\alpha$ -cyclanolin, $\beta$ -cyclanolin | <a href="#">235, 236</a> |
|                |                    | <i>Cyclea peltata</i>          | rhizomes                                 | <b>bisBIAs:</b> phaeanthine, cycleanine                                                                                                                                                                                                                                                                                                  | <a href="#">237</a>      |
| Menispermaceae | <i>Menispermum</i> | <i>Menispermum dauricum</i>    | roots, stems,<br>rhizomes,<br>leaves     | <b>bisBIAs:</b> dauricine, dauricoline<br><b>Morphinans:</b> sinomenine<br><b>Aporphines:</b> magnoflorine, stepharine                                                                                                                                                                                                                   | <a href="#">238</a>      |

|                |                   |                              |                                         |                                                                                                                                                                                                                                                                                                                                                                                                                                                                                                                                                                                                                                                                                                                                                                                                                                                                                                                                                              |                         |
|----------------|-------------------|------------------------------|-----------------------------------------|--------------------------------------------------------------------------------------------------------------------------------------------------------------------------------------------------------------------------------------------------------------------------------------------------------------------------------------------------------------------------------------------------------------------------------------------------------------------------------------------------------------------------------------------------------------------------------------------------------------------------------------------------------------------------------------------------------------------------------------------------------------------------------------------------------------------------------------------------------------------------------------------------------------------------------------------------------------|-------------------------|
| Menispermaceae | <i>Sinomenium</i> | <i>Menispermum canadense</i> | rhizomes                                | <b>bisBIAs:</b> dauricine                                                                                                                                                                                                                                                                                                                                                                                                                                                                                                                                                                                                                                                                                                                                                                                                                                                                                                                                    | <a href="#">239</a>     |
|                |                   | <i>Sinomenium acutum</i>     | roots, stems, leaves, seeds, rhizomes   | <b>1-BIAs:</b> (-)- <i>N</i> -methylcoclaurine<br><b>Morphinans:</b> 8-demethoxycephatonine, 7( <i>R</i> )-7,8-dihydrosinomenine, 8-demethoxyrunanine, sinomenine, salutaridine<br><b>Aporphines:</b> magnoflorine, sallisonine E, bianfugenine, menisperine<br><b>BBRs:</b> cheilanthifoline, tetrahydropalmatine, stepharanine                                                                                                                                                                                                                                                                                                                                                                                                                                                                                                                                                                                                                             | <a href="#">240-242</a> |
| Menispermaceae | <i>Stephania</i>  | <i>Stephania abyssinica</i>  | leaves                                  | <b>bisBIAs:</b> (-)-pseudocurine, (-)-pseudoisocurine                                                                                                                                                                                                                                                                                                                                                                                                                                                                                                                                                                                                                                                                                                                                                                                                                                                                                                        | <a href="#">243</a>     |
|                |                   | <i>Stephania aculeata</i>    | leaves                                  | <b>1-BIAs:</b> (+)-laudanidine                                                                                                                                                                                                                                                                                                                                                                                                                                                                                                                                                                                                                                                                                                                                                                                                                                                                                                                               | <a href="#">244</a>     |
|                |                   | <i>Stephania bancroftii</i>  | tubers                                  | <b>Aporphines:</b> stephanine, (-)-crebanine, ayuthianine<br><b>BBRs:</b> (-)-tetrahydropalmatine                                                                                                                                                                                                                                                                                                                                                                                                                                                                                                                                                                                                                                                                                                                                                                                                                                                            | <a href="#">244</a>     |
|                |                   | <i>Stephania brachyandra</i> | -                                       | <b>Aporphines:</b> (-)-dicentrine                                                                                                                                                                                                                                                                                                                                                                                                                                                                                                                                                                                                                                                                                                                                                                                                                                                                                                                            | <a href="#">245</a>     |
|                |                   | <i>Stephania cambodica</i>   | tubers                                  | <b>Aporphines:</b> glycoside, isocorydine<br><b>BBRs:</b> tetrahydropalmatine, jatrorrhizine                                                                                                                                                                                                                                                                                                                                                                                                                                                                                                                                                                                                                                                                                                                                                                                                                                                                 | <a href="#">246</a>     |
|                |                   | <i>Stephania cephalantha</i> | stems, leaves, tuber, root tuber, seeds | <b>1-BIAs:</b> protosinomenine, <i>N</i> -methylcoclaurine, (+)-coclaurine, (+)-reticuline, juziphine, (+)-laudanidine<br><b>bisBIAs:</b> trilobine, isotetrandrine, cepharanthine, cycleanine, cepharamine, berbamine, cepharanoline, homoaromoline, obamegine, (+)-aromoline, dnorcycleanine, ( <i>S</i> )-corydine, thalrugosine, 3,4-dehdrocycleanine, (-)-cycleanine, (-)-norcycleanine, cepharanthine, 2-norcepharanthine, cepharanoline, 2-norcepharanoline, obaberine, oxyacanthine, stephibaberine, homoaromoline, aromoline, isotetrandrine, berbamine, thalrugosine, obamegine, 2-norisorotetrandrine, 2-norberbamine, secocepharanthine, 3',4'-dihydrostephasubine<br><b>Morphinans:</b> sinomenine, FK-3000, cephacicine, cephasamine, sinoacutine, cephamuline, 14-episinomenine, cephamonine, tannagine, cepharamine<br><b>Aporphines:</b> lysicamine, corydine, isocorydine, isocorytuberine, (+)-isoboldine, <i>N</i> -methylasimilobine-2- | <a href="#">247-249</a> |

|                                |              |                                                                                                                                                                                                                                                                           |                                           |
|--------------------------------|--------------|---------------------------------------------------------------------------------------------------------------------------------------------------------------------------------------------------------------------------------------------------------------------------|-------------------------------------------|
|                                |              | <i>O</i> - $\beta$ -D-glucopyranoside, stesakine-9- <i>O</i> - $\beta$ -D-glucopyranoside                                                                                                                                                                                 |                                           |
| <i>Stephania elegans</i>       | leaves       | <b>BBRs:</b> palmatine, corypalmine<br><b>bisBIAs:</b> tetrandrine, cycleanine<br><b>Aporphines:</b> <i>N</i> -methylcorydalmine, stepharine, magnoflorine, menisperine, roemerine                                                                                        | <a href="#">245</a> , <a href="#">250</a> |
| <i>Stephania dinklagei</i>     | aerial parts | <b>BBRs:</b> palmatine, corydalmine, <i>N</i> -methylcorydalmine, columbamine, tetrahydropalmatine, jatrorrhizine<br><b>Aporphines:</b> liriodenine, dicentrinone, (+)-corydine, <i>N</i> -methyliriiodendronine, 2- <i>O,N</i> -dimethyliriiodendronine                  | <a href="#">251</a>                       |
| <i>Stephania erecta</i>        | tubers       | <b>bisBIAs:</b> (+)-2- <i>N</i> -methyltelobine, (+)-1,2-dehydrotelobine, (+)-thalrugosine, (+)-isotetrandrine                                                                                                                                                            | <a href="#">252</a>                       |
| <i>Stephania epigaea</i>       | seeds        | <b>bisBIAs:</b> cepharanthine<br><b>Aporphines:</b> stesakine-9- <i>O</i> - $\beta$ -D-glucopyranoside, <i>N</i> -methylasimilobine-2- <i>O</i> - $\beta$ -D-glucopyranoside                                                                                              | <a href="#">253</a>                       |
| <i>Stephania glabra</i>        | tuber        | <b>bisBIAs:</b> cycleanine, <i>N</i> -desmethycycleanine<br><b>Aporphines:</b> (+)-pronuciferine<br><b>BBRs:</b> corydalmine, capaurine, stepholidine, stepharine, palmatine, dehydrocorydalmine, jatrorrhizine, stepharanine, columbamine                                | <a href="#">254</a>                       |
| <i>Stephania gracilentia</i>   | -            | <b>Aporphines:</b> magnoflorine                                                                                                                                                                                                                                           | <a href="#">245</a>                       |
| <i>Stephania hernandifolia</i> | -            | <b>bisBIAs:</b> (+)-epistephanine, (+)-3,4-dihydrostephasubine, (+)-stephasubine, fangchinoline, d-tetrandrine                                                                                                                                                            | <a href="#">245</a>                       |
| <i>Stephania yunnanensis</i>   | tubers       | <b>Morphinans:</b> sinoacutine<br><b>Aporphines:</b> dehydrocrebanine, (-)-crebanine, (-)-dicentrine, (-)-cassythine, (-)-sukhodaninane, (-)-stephanine, fibrecisine, (-)-roemerine, oxocrebanine<br><b>BBRs:</b> (-)-corydalmine, stepharanine, jatrorrhizine, palmatine | <a href="#">255</a>                       |
| <i>Stephania intermedia</i>    | -            | <b>BBRs:</b> (S)-tetrahydropalmatine, (-)-stepholidine                                                                                                                                                                                                                    | <a href="#">245</a>                       |
| <i>Stephania japonica</i>      | roots        | <b>bisBIAs:</b> cycleanine, d-fangchinoline, bebeerine<br><b>Aporphines:</b> lanuginosine, stephanine                                                                                                                                                                     | <a href="#">245</a>                       |
| <i>Stephania miyiensis</i>     | -            | <b>Aporphines:</b> stepharine<br><b>BBRs:</b> tetrahydropalmatine, corydalmine, jatrorrhizine,                                                                                                                                                                            | <a href="#">245</a>                       |

|                            |                                    |  |                                                                                                                                                                                                                                                                                                                                                                                                                                                                                                                                                                                                 |                          |
|----------------------------|------------------------------------|--|-------------------------------------------------------------------------------------------------------------------------------------------------------------------------------------------------------------------------------------------------------------------------------------------------------------------------------------------------------------------------------------------------------------------------------------------------------------------------------------------------------------------------------------------------------------------------------------------------|--------------------------|
|                            |                                    |  | stepharanin                                                                                                                                                                                                                                                                                                                                                                                                                                                                                                                                                                                     |                          |
| <i>Stephania pierrei</i>   | tubers                             |  | <b>1-BIAs:</b> (+)-reticuline, coclaurine<br><b>Morphinans:</b> salutaridine<br><b>Aporphines:</b> (-)-asimilobine, (-)-dicentrine<br><b>BBRs:</b> (-)-tetrahydropalmitine, cyclanoline, (-)- <i>N</i> -methyltetrahydropalmitine                                                                                                                                                                                                                                                                                                                                                               | <a href="#">256</a>      |
| <i>Stephania rotunda</i>   | tubers, roots                      |  | <b>bisBIAs:</b> norcepharanthine, cepharanoline, fangchinoline<br><b>Aporphines:</b> remerine<br><b>BBRs:</b> tetrahydropalmitine, stepholidine, palmitine                                                                                                                                                                                                                                                                                                                                                                                                                                      | <a href="#">257, 258</a> |
| <i>Stephania sinica</i>    | -                                  |  | <b>bisBIAs:</b> cepharanthine                                                                                                                                                                                                                                                                                                                                                                                                                                                                                                                                                                   | <a href="#">245</a>      |
| <i>Stephania succifera</i> | leaves, roots                      |  | <b>1-BIAs:</b> isococlaurine, coclaurine, reticuline<br><b>Aporphines:</b> crebanine, stepharine, anonaine<br><b>BBRs:</b> jatrorrhizine, tetrahydropalmitine, thaicanine, palmitine                                                                                                                                                                                                                                                                                                                                                                                                            | <a href="#">259</a>      |
| <i>Stephania tetrandra</i> | roots, aerial parts                |  | <b>bisBIAs:</b> tetrandrine, fangchinoline, fentifangjine J, fentifangjine K, fentifangjine L, fentifangjine M, fentifangjine N, fentifangjine O, Fentifangjine P, fentifangjine Q, fentifangjine R, fentifangjine S, fangchinoline, (+)-2- <i>N</i> -merhylfangchinoline<br><b>Aporphines:</b> stephtetrandrine E, (+)- <i>N</i> -acetylnordicentrine (+)- <i>N</i> -formylndicentrine, (+)- <i>N</i> -formylnorisocorydine, stephadione, corydione, oxonantenine, cassameridine, nantenine, cassythicine<br><b>Protopines:</b> protopine                                                      | <a href="#">260-263</a>  |
| <i>Stephania venosa</i>    | whole plant, roots, tubers, leaves |  | <b>Aporphines:</b> dehydrocrebanine, crebanine, stephanine, <i>O</i> -methylbulbocapnine, kamaline, dicentrine, tetrahydropalmitine, thailandine, liriodenine, (-)- <i>O</i> -acetylsukhodianeine, oxostephanosine, (+)- <i>N</i> -carboxamidostepharine, (-)- <i>O</i> -methylstepharinosine, (-)-stepharinosine, (-)-11,12-dihydrostepharine, (-)-sukhodianeine- $\beta$ - <i>N</i> -oxide, (-)-ushinsunine- $\beta$ - <i>N</i> -oxide, (-)-stephadiolamine- $\beta$ - <i>N</i> -oxide<br><b>BBRs:</b> tetrahydropalmitine, (-)- <i>N</i> -methyltetrahydropalmitine, (-)-tetrahydropalmitine | <a href="#">264-267</a>  |

|                |                  |                                                        |                              |                                                                                                                                                                                                                                                                                                                                                                                                                                                                                                             |                                            |
|----------------|------------------|--------------------------------------------------------|------------------------------|-------------------------------------------------------------------------------------------------------------------------------------------------------------------------------------------------------------------------------------------------------------------------------------------------------------------------------------------------------------------------------------------------------------------------------------------------------------------------------------------------------------|--------------------------------------------|
|                |                  | <i>Stephania viridiflavens</i>                         | root barks,<br>tubers        | <b>1-BIAs:</b> (+)-1S, 2R-laudandinine- <i>N</i> - $\beta$ -oxide, (+)-1S, 2S-<br>laudandinine- <i>N</i> - $\alpha$ -oxide, (+)-laudandinine, (+)-reticuline,<br>(+)-1S, 2R-reticuline- <i>N</i> - $\beta$ -oxide, (+)-1S, 2S-reticuline- <i>N</i> -<br>$\alpha$ -oxide<br><b>Aporphines:</b> 6R,6aS-corydine <i>N</i> -oxide, 6R,6aS-<br>isocorydine <i>N</i> -oxide, <i>N</i> -methyl-laurotetanine, stepharine<br><b>bisBIAs:</b> tetrandrine                                                            | <a href="#">268, 269</a>                   |
| Menispermaceae | <i>Tinospora</i> | <i>Tinospora crispa</i><br><i>Tinospora cordifolia</i> | stem<br>aerial parts         | <b>1-BIAs:</b> norcoclaurine, reticuline<br><b>Aporphines:</b> magnoflorine, isocorydine, laurifoline,<br>menisperine, xanthoplainine, isoboldine, boldine,<br>chiloenamine<br><b>BBRs:</b> jatrorrhizine, palmatine, stepharanine,<br>tetrahydrojatrorrhizine, tetrahydropalmatine, <i>N</i> -methyl<br>tetrahydrocolumbamine<br><b>PQs:</b> bicuculline, (+)-adlumidine, adlumine                                                                                                                         | <a href="#">270</a><br><a href="#">271</a> |
| Papaveraceae   | <i>Adlumia</i>   | <i>Adlumia fungosa</i>                                 | -                            | <b>PQs:</b> bicuculline, (+)-adlumidine, adlumine                                                                                                                                                                                                                                                                                                                                                                                                                                                           | <a href="#">177</a>                        |
| Papaveraceae   | <i>Argemone</i>  | <i>Argemone mexicana</i>                               | aerial parts,<br>whole plant | <b>1-BIAs:</b> (+)-argenaxine, (+)-higenamine, (+)-reticuline<br><b>BBRs:</b> berberine, coptisine, ( $\pm$ )-tetrahydroberberine,<br>dehydrocheilantifoline, demethyleneberberine<br><b>Protopines:</b> protopine, allocryptopine, argemexicaines<br>A, argemexicaines B<br><b>BZPs:</b> <i>N</i> -demethylxysanguinarine, pancorine, 6-<br>acetylhydrochelerythrine, norchelerythrine, <i>O</i> -<br>methylzanthoxyline, sanguinarine, 6-<br>acetylhydroxysanguinarine, ( $\pm$ )-angoline, chelerythrine | <a href="#">272-274</a>                    |
|                |                  | <i>Argemone platyceras</i>                             | roots, aerial<br>parts       | <b>1-BIAs:</b> (+)-laudanosine<br><b>Aporphines:</b> (+)-magnoflorine<br><b>BBRs:</b> coptisine, berberine, corysamine, (-)-scoulerine<br><b>Protopines:</b> protopine, allocryptopine<br><b>BZPs:</b> chelerythrine, sanguinarine<br><b>Pavines:</b> (-)-munitagine, (-)-argemonine, (-)-platycerine,<br>(-)-norargemonine<br><b>BZPs:</b> ( $\pm$ )-6-acetylhydrochelerythrine, ( $\pm$ )-6-<br>acetylhydroxysanguinarine                                                                                 | <a href="#">275</a>                        |
| Papaveraceae   | <i>Bocconia</i>  | <i>Bocconia frutescens</i>                             | leaves                       | <b>BZPs:</b> ( $\pm$ )-6-acetylhydrochelerythrine, ( $\pm$ )-6-<br>acetylhydroxysanguinarine                                                                                                                                                                                                                                                                                                                                                                                                                | <a href="#">276</a>                        |
| Papaveraceae   | <i>Corydalis</i> | <i>Corydalis aurea</i>                                 | -                            | <b>PQs:</b> bicuculline, ( $\pm$ )-cordrastine                                                                                                                                                                                                                                                                                                                                                                                                                                                              | <a href="#">177</a>                        |

|                               |             |                                                                                                                                                                                                                                                                                                      |                          |
|-------------------------------|-------------|------------------------------------------------------------------------------------------------------------------------------------------------------------------------------------------------------------------------------------------------------------------------------------------------------|--------------------------|
| <i>Corydalis bulbosa</i>      | whole plant | <b>Aporphines:</b> corydione, dehydronantenine, oxonantenine, (+)-isoboldine<br><b>BBRs:</b> (-)-stylophine<br><b>PQs:</b> bicuculline                                                                                                                                                               | <a href="#">277</a>      |
| <i>Corydalis caseana</i>      | -           | <b>PQs:</b> $\alpha$ -gnoscopine, (-)-capnoidine, $\beta$ -gnoscopine                                                                                                                                                                                                                                | <a href="#">177</a>      |
| <i>Corydalis cava</i>         | -           | <b>BBRs:</b> stylophine<br><b>Protopines:</b> protopine                                                                                                                                                                                                                                              | <a href="#">278</a>      |
| <i>Corydalis crispa</i>       | aerial part | <b>PQs:</b> bicuculline, (-)-capnoidine                                                                                                                                                                                                                                                              | <a href="#">177</a>      |
| <i>Corydalis crystallina</i>  | -           | <b>PQs:</b> corybensines A, corybensines B, 7'-O-ethylegenine- $\alpha$ -N-oxide, (+)-corlumidine, (+)-adlumine, capnoidine                                                                                                                                                                          | <a href="#">279</a>      |
| <i>Corydalis decumbens</i>    | bulbs       | <b>PQs:</b> $\beta$ -hydrastine                                                                                                                                                                                                                                                                      | <a href="#">177</a>      |
| <i>Corydalis fimbriifera</i>  | -           | <b>BZPs:</b> 6-(2-hydroxyethyl)-5,6-dihydrosanguinarine, 6-acetyl-5,6-dihydrosanguinarine                                                                                                                                                                                                            | <a href="#">280</a>      |
| <i>Corydalis flabellata</i>   | roots       | <b>PQs:</b> (+)-adlumidine                                                                                                                                                                                                                                                                           | <a href="#">177</a>      |
| <i>Corydalis gigantea</i>     | -           | <b>bisBIAs:</b> bicoryanunine A<br><b>Aporphines:</b> isoboldine, oxoglucine<br><b>BBRs:</b> corydaline, tetrahydroberberine, tetrahydropalmatine, tetrahydrocoptisine, columbamine, berberine, epiberberine, coptisine, jatrorrhizine, dehydrocorydaline, palmatine<br><b>Protopines:</b> protopine | <a href="#">281-283</a>  |
| <i>Corydalis hendersonii</i>  | whole plant | <b>BBRs:</b> stylophine,<br><b>PQs:</b> 9-methyldecumbenine C<br><b>Protopines:</b> protopine                                                                                                                                                                                                        | <a href="#">284</a>      |
| <i>Corydalis huschowensis</i> | bulbs       | <b>BBRs:</b> (-)-stylophine, cheilanthifoline<br><b>Protopines:</b> protopine                                                                                                                                                                                                                        | <a href="#">285</a>      |
| <i>Corydalis impatiens</i>    | whole plant | <b>BBRs:</b> cavidine, tetrahydrocoptisine<br><b>Protopines:</b> protopine                                                                                                                                                                                                                           | <a href="#">286</a>      |
| <i>Corydalis longipes</i>     | whole plant | <b>PQs:</b> $\alpha$ -hydrastine, $\beta$ -hydrastine                                                                                                                                                                                                                                                | <a href="#">287</a>      |
| <i>Corydalis mucronifera</i>  | whole plant | <b>1-BIAs:</b> orientaline<br><b>BBRs:</b> demethylcorydalmine, tetrahydroberberubine<br><b>PQs:</b> 9-methyldecumbenine C, (+)-adlumine, 1R,9S,7'                                                                                                                                                   | <a href="#">288, 289</a> |

|              |                    |                                  |                                |                                                                                                                                                                                                                                                                                                                                                                                                                                                                                                                                                                                                    |                     |
|--------------|--------------------|----------------------------------|--------------------------------|----------------------------------------------------------------------------------------------------------------------------------------------------------------------------------------------------------------------------------------------------------------------------------------------------------------------------------------------------------------------------------------------------------------------------------------------------------------------------------------------------------------------------------------------------------------------------------------------------|---------------------|
|              |                    |                                  |                                | 5-methylegenine<br><b>BZPs:</b> dihydrosanguinarine<br><b>Protopines:</b> protopine<br><b>PQs:</b> (±)-adlumine                                                                                                                                                                                                                                                                                                                                                                                                                                                                                    | <a href="#">177</a> |
|              |                    | <i>Corydalis gigantea</i>        | -                              |                                                                                                                                                                                                                                                                                                                                                                                                                                                                                                                                                                                                    | <a href="#">177</a> |
|              |                    | <i>Corydalis gortschakovii</i>   | -                              | <b>PQs:</b> (±)-adlumine                                                                                                                                                                                                                                                                                                                                                                                                                                                                                                                                                                           | <a href="#">177</a> |
|              |                    | <i>Corydalis ledebouriana</i>    | -                              | <b>PQs:</b> (-)-corledine                                                                                                                                                                                                                                                                                                                                                                                                                                                                                                                                                                          | <a href="#">177</a> |
|              |                    | <i>Corydalis nobilis</i>         | -                              | <b>PQs:</b> (+)-corlumine                                                                                                                                                                                                                                                                                                                                                                                                                                                                                                                                                                          | <a href="#">177</a> |
|              |                    | <i>Corydalis ochroleuca</i>      | -                              | <b>PQs:</b> bicucullinine                                                                                                                                                                                                                                                                                                                                                                                                                                                                                                                                                                          | <a href="#">177</a> |
|              |                    | <i>Corydalis pseudoaunca</i>     | -                              | <b>PQs:</b> β-hydrastine, (-)-isohydrastidine                                                                                                                                                                                                                                                                                                                                                                                                                                                                                                                                                      | <a href="#">177</a> |
|              |                    | <i>Corydalis rosea</i>           | -                              | <b>PQs:</b> (±)-capnoidine                                                                                                                                                                                                                                                                                                                                                                                                                                                                                                                                                                         | <a href="#">177</a> |
|              |                    | <i>Corydalis rupestris</i>       | aerial parts                   | <b>BBRs:</b> (-)-stylophine, rupestrine A, rupestrine B, rupestrine C, rupestrine D                                                                                                                                                                                                                                                                                                                                                                                                                                                                                                                | <a href="#">290</a> |
|              |                    | <i>Corydalis scouleri</i>        | -                              | <b>PQs:</b> (+)-corlumine, (+)-corlumidine                                                                                                                                                                                                                                                                                                                                                                                                                                                                                                                                                         | <a href="#">177</a> |
|              |                    | <i>Corydalis stricta</i>         | -                              | <b>PQs:</b> β-hydrastine                                                                                                                                                                                                                                                                                                                                                                                                                                                                                                                                                                           | <a href="#">177</a> |
|              |                    | <i>Corydalis tomentella</i>      | air-dried<br>herbs             | <b>1-BIAs:</b> hendersine B<br><b>BBRs:</b> 13 <i>R</i> -tomentelline<br><b>PQs:</b> 9 <i>S</i> -alkterlactone B, (1 <i>S</i> ,9 <i>S</i> )-1-hydroxy-9-methyl-corumine                                                                                                                                                                                                                                                                                                                                                                                                                            | <a href="#">291</a> |
|              |                    | <i>Corydalis turtschaninovii</i> | tubers                         | <b>Aporphines:</b> didehydroglaucine, dehydroliroferine, (+)-norglaucine, oxoglaucine, (+)-laurotetanine, 7-hydroxydehydroglaucine, 7-methyldehydroglaucine, (+)-glaucine, (+)- <i>N</i> -methyllaurotetanine<br><b>BBRs:</b> berberine, jatrorrhizine, coptisine, palmatine, pseudodehydrocorydaline, dehydrocorybulbine, pseudocoptisine, yuanhunine, (-)-tetrahydrocoptisine, isocorybulbine, (+)-corydaline, (+)-nandinine, (+)-corybulbine, (5 <i>S</i> )-(-)-canadine, (-)-corypalmine, (-)-tetrahydropalmatine, (-)-isocorypalmine, columbamine, dehydrocorydaline, pseudodehydrocorydaline | <a href="#">292</a> |
| Papaveraceae | <i>Chelidonium</i> | <i>Chelidonium majus</i>         | aerial parts,<br>leaves, roots | <b>BBRs:</b> berberine, epiberberine, stylophine, coptisine<br><b>BZPs:</b> sanguinarine, chelidonine, chelerythrine<br><b>Protopines:</b> protopine                                                                                                                                                                                                                                                                                                                                                                                                                                               | <a href="#">293</a> |

|              |                      |                                 |                    |                                                                                                                                                                                                                                                                                                                                                  |                          |
|--------------|----------------------|---------------------------------|--------------------|--------------------------------------------------------------------------------------------------------------------------------------------------------------------------------------------------------------------------------------------------------------------------------------------------------------------------------------------------|--------------------------|
| Papaveraceae | <i>Dactylicapnos</i> | <i>Dactylicapnos torulosa</i>   | whole plant        | <b>Aporphines:</b> isocorydine<br><b>BBRs:</b> coptisine, pseudocoptisine, berberine, canadine<br><b>Protopines:</b> protopine, allocryptopine, coulteropine<br><b>BZPs:</b> norsanguinarine, oxosanguinarine, 8-acetyl-dihydrosanguinarine, chelidonine<br><b>PQs:</b> (-)- $\beta$ -hydrastine                                                 | <a href="#">294, 295</a> |
|              |                      | <i>Dactylicapnos scandens</i>   | roots, leaves      | <b>Morphinans:</b> pallidine<br><b>Aporphines:</b> norisocorydine, <i>N</i> -methyllaurotetanine, oxoglucine, norglucine<br><b>Protopines:</b> protopine<br><b>PQs:</b> bicuculline                                                                                                                                                              | <a href="#">296</a>      |
| Papaveraceae | <i>Dicentra</i>      | <i>Dicentra chrysantha</i>      | -                  | <b>PQs:</b> bicuculline                                                                                                                                                                                                                                                                                                                          | <a href="#">177</a>      |
|              |                      | <i>Dicentra cucullaria</i>      | -                  | <b>PQs:</b> bicuculline, (+)-corlumine                                                                                                                                                                                                                                                                                                           | <a href="#">177</a>      |
|              |                      | <i>Dicentra ochroleuca</i>      | -                  | <b>PQs:</b> bicuculline                                                                                                                                                                                                                                                                                                                          | <a href="#">177</a>      |
|              |                      | <i>Dicentra spectabilis</i>     | roots, herbs       | <b>Aporphines:</b> glaucine, corydine, dicentrine<br><b>Protopines:</b> protopine<br><b>BZPs:</b> sanguinarine<br><b>Protopines:</b> protopine<br><b>BZPs:</b> sanguinarine, chelerythrine, chelirubine                                                                                                                                          | <a href="#">297-299</a>  |
| Papaveraceae | <i>Dicranostigma</i> | <i>Dicranostigma lactuoides</i> | roots              | <b>Morphinans:</b> sinoacutine<br><b>Aporphines:</b> isocorytuberine, corydine, isocorydine, magnoflorine<br><b>BBRs:</b> 5-hydroxy-coptisine, coptisine, berberine<br><b>Protopines:</b> protopine, allocryptopine<br><b>BZPs:</b> sanguinarine, chelerythrine                                                                                  | <a href="#">300</a>      |
|              |                      | <i>Dicranostigma leptopodum</i> | whole plant, roots | <b>Aporphines:</b> isocorytuberine, corydine, isocorydine, magnoflorine<br><b>BBRs:</b> 5-hydroxy-coptisine, coptisine, berberine<br><b>Protopines:</b> protopine, allocryptopine<br><b>BZPs:</b> sanguinarine, chelerythrine<br><b>BBRs:</b> corydamine, (-)-sinactine<br><b>Protopines:</b> protopine, cryptopine<br><b>PQs:</b> (+)-corlumine | <a href="#">301-303</a>  |
| Papaveraceae | <i>Fumaria</i>       | <i>Fumaria officinalis</i>      | aerial parts       | <b>BBRs:</b> (+)-corlumine<br><b>BBRs:</b> coptisine<br><b>Protopines:</b> protopine<br><b>1-BIAs:</b> fumaflorine, fumaflorine methyl ester                                                                                                                                                                                                     | <a href="#">304</a>      |
|              |                      | <i>Fumaria indica</i>           | whole plant        | <b>Aporphines:</b> corytuberine<br><b>BBRs:</b> (-)-sinactine, coptisine, scoulerine, stylophine<br><b>PQs:</b> ( $\pm$ )-adlumine                                                                                                                                                                                                               | <a href="#">305, 306</a> |
|              |                      | <i>Fumaria densiflora</i>       | aerial parts       | <b>BBRs:</b> trans-protopinium, stylophine                                                                                                                                                                                                                                                                                                       | <a href="#">307</a>      |
|              |                      | <i>Fumaria kralickii</i>        | -                  |                                                                                                                                                                                                                                                                                                                                                  | <a href="#">177</a>      |
|              |                      | <i>Fumaria parviflora</i>       | roots              |                                                                                                                                                                                                                                                                                                                                                  | <a href="#">177, 308</a> |



|              |                     |                                 |                        |                                                                                                                                                                                                                                                                                                                                                                                                         |                          |
|--------------|---------------------|---------------------------------|------------------------|---------------------------------------------------------------------------------------------------------------------------------------------------------------------------------------------------------------------------------------------------------------------------------------------------------------------------------------------------------------------------------------------------------|--------------------------|
|              |                     |                                 |                        | <b>PQs:</b> (-)-corlumine, (±)-adlumine, fumaramine, fumaridine, fumaramidine                                                                                                                                                                                                                                                                                                                           |                          |
|              |                     | <i>Fumaria rostellata</i>       | -                      | <b>PQs:</b> (±)-adlumine                                                                                                                                                                                                                                                                                                                                                                                | <a href="#">177</a>      |
|              |                     | <i>Fumaria schleicheri</i>      | -                      | <b>PQs:</b> β-hydrastine                                                                                                                                                                                                                                                                                                                                                                                | <a href="#">177</a>      |
|              |                     | <i>Fumaria vaillantii</i>       | -                      | <b>PQs:</b> (+)-egenine, fumaramine, N-methylhydrastine                                                                                                                                                                                                                                                                                                                                                 | <a href="#">177, 309</a> |
| Papaveraceae | <i>Eschscholzia</i> | <i>Eschscholzia californica</i> | aerial parts,<br>roots | <b>1-BIAs:</b> reticuline<br><b>Morphinans:</b> salutaridine<br><b>Aporphines:</b> N-methylaurotetanine, magnoflorine, corydine, isoboldine<br><b>BBRs:</b> scoulerine<br><b>Protopines:</b> protopine, allocryptopine<br><b>BZPs:</b> sanguinarine, chelirubine, macarpine, chelerythrine, chelilutine<br><b>Pavines:</b> californidine, eschscholzia                                                  | <a href="#">310-312</a>  |
| Papaveraceae | <i>Glaucium</i>     | <i>Glaucium aleppicum</i>       | aerial parts           | <b>Aporphines:</b> corydine, dehydroglaucone, isocorydine<br><b>Protopines:</b> allocryptopine                                                                                                                                                                                                                                                                                                          | <a href="#">313</a>      |
|              |                     | <i>Glaucium carniculatu</i>     | -                      | <b>Protopines:</b> dihydroprotopine                                                                                                                                                                                                                                                                                                                                                                     | <a href="#">313</a>      |
|              |                     | <i>Glaucium corniculatum</i>    | aerial parts           | <b>Aporphines:</b> glaucine, norbracteoline<br><b>BBRs:</b> N-methyl canadine, trans-protopinium, cis-protopinium<br><b>Protopines:</b> glauciumoline                                                                                                                                                                                                                                                   | <a href="#">313, 314</a> |
|              |                     | <i>Glaucium elegans</i>         | aerial parts           | <b>BZPs:</b> (±)-chelidonine                                                                                                                                                                                                                                                                                                                                                                            | <a href="#">313</a>      |
|              |                     | <i>Glaucium grandiflorum</i>    | aerial parts           | <b>Aporphines:</b> corydine, isocorydine<br><b>Protopines:</b> protopine, glauciumoline                                                                                                                                                                                                                                                                                                                 | <a href="#">313, 314</a> |
|              |                     | <i>Glaucium flavum</i>          | aerial parts,<br>roots | <b>Morphinans:</b> salutaridine<br><b>Aporphines:</b> glaucine, isocorydine, isoboldine, norglauceine, dehydroglauceine, cataline, 6,6a-dehydronorglauceine, dihydropontevedrine, oxoglauceine<br><b>Protopines:</b> allocryptopine, protopine<br><b>BZPs:</b> norchelidonine, 8-acetyldihydrosanguinarine, bocconoline, dihydrochelerythrine, dihydrochelerythriny-8-acetaldehyde, 8-iminosanguinarine | <a href="#">313, 315</a> |

|              |                   |                                           |                      |                                                                                                                                                                                                                                                                                                                                                                                                                |                          |
|--------------|-------------------|-------------------------------------------|----------------------|----------------------------------------------------------------------------------------------------------------------------------------------------------------------------------------------------------------------------------------------------------------------------------------------------------------------------------------------------------------------------------------------------------------|--------------------------|
|              |                   | <i>Glaucium flavum</i> var. <i>fulvum</i> | aerial parts, roots  | <b>Aporphines:</b> pontevedrine, glaunidine, corunnine, arosinine<br><b>BZPs:</b> ( <i>R</i> )-luguine, (-)-norchelidonine, norsanguinarine, oxychelirubine                                                                                                                                                                                                                                                    | <a href="#">313</a>      |
|              |                   | <i>Glaucium fimbriigerum</i>              | aerial parts, leaves | <b>Aporphines:</b> (+)-bulbocapnine- $\beta$ - <i>N</i> -oxide, dehydrocorydine, epiglaufidine, glaufidine, glaufine, glaunidine, glaunine, hemagine, isocorytuberine, norcorydine<br><b>BBRs:</b> ( <i>S</i> )-isocorypalmine                                                                                                                                                                                 | <a href="#">313, 316</a> |
|              |                   | <i>Glaucium oxylobum</i>                  | aerial parts         | <b>Aporphines:</b> isocorytuberine, <i>N</i> -methyldomesticine, ( <i>S</i> )-predicentrine                                                                                                                                                                                                                                                                                                                    | <a href="#">313</a>      |
|              |                   | <i>Glaucium paucilobium</i>               | -                    | <b>Aporphines:</b> corydine <i>N</i> -oxide                                                                                                                                                                                                                                                                                                                                                                    | <a href="#">313</a>      |
|              |                   | <i>Glaucium squamigerum</i>               | -                    | <b>BBRs:</b> $\beta$ - <i>N</i> -methylisocorypalminium                                                                                                                                                                                                                                                                                                                                                        | <a href="#">313</a>      |
|              |                   | <i>Glaucium vitellinum</i>                | -                    | <b>Aporphines:</b> isocorydine, dicentrine<br><b>Protamines:</b> protopine                                                                                                                                                                                                                                                                                                                                     | <a href="#">317</a>      |
| Papaveraceae | <i>Hypecoum</i>   | <i>Hypecoum leptocarpum</i>               | whole plant          | <b>Protamines:</b> leptocarpine                                                                                                                                                                                                                                                                                                                                                                                | <a href="#">318</a>      |
| Papaveraceae | <i>Meconopsis</i> | <i>Meconopsis quintuplinervia</i>         | whole plants         | <b>Morphinans:</b> mecoquitupline                                                                                                                                                                                                                                                                                                                                                                              | <a href="#">319</a>      |
|              |                   | <i>Meconopsis horridula</i>               | aerial parts         | <b>Aporphines:</b> 8, 9-dihydroprooxocryptochine<br><b>Protamines:</b> protopine                                                                                                                                                                                                                                                                                                                               | <a href="#">320</a>      |
| Papaveraceae | <i>Papaver</i>    | <i>Papaver Pseudo-orientale</i>           | stem                 | <b>PQs:</b> (-)-papaveroxidine                                                                                                                                                                                                                                                                                                                                                                                 | <a href="#">321</a>      |
|              |                   | <i>Papaver fugax</i>                      | aerial parts         | <b>1-BIAs:</b> papaverine<br><b>Morphinans:</b> morphine, codeine<br><b>Aporphines:</b> 6a,7-dehydrofloripavidine<br><b>BZPs:</b> sanguinarine                                                                                                                                                                                                                                                                 | <a href="#">322</a>      |
|              |                   | <i>Papaver rhoeas</i>                     | aerial parts         | <b>PQs:</b> ( $\pm$ )- $\alpha$ -gnoscopine, ( $\pm$ )- $\beta$ -narcotine, noscapine<br><b>1-BIAs:</b> DL-demethylcoclaurine (higenamine), coclaurine, reticuline<br><b>Morphinans:</b> salutaridine<br><b>Aporphines:</b> roemerine, corytuberine<br><b>BBRs:</b> tetrahydrocolumbamine, L-tetrahydropalmitine, tetrahydroberberine, berberine, stylophine, dihydroberberine<br><b>Protamines:</b> protopine | <a href="#">323, 324</a> |

|                 |                       |                                 |                           |                    |                                                                                                                                                                                                                                                                                                                                                                                                                                                                                         |                               |
|-----------------|-----------------------|---------------------------------|---------------------------|--------------------|-----------------------------------------------------------------------------------------------------------------------------------------------------------------------------------------------------------------------------------------------------------------------------------------------------------------------------------------------------------------------------------------------------------------------------------------------------------------------------------------|-------------------------------|
|                 |                       |                                 | <i>Papaver somniferum</i> | stem, root         | <b>BZPs:</b> dihydrosanguinarine, sanguinarine<br><b>1-BIAs:</b> papaverine<br><b>bisBIAs:</b> (+)-tubocurarine<br><b>Morphinans:</b> morphine, codeine<br><b>Aporphines:</b> magnoflorine<br><b>BBRs:</b> berberine<br><b>BZPs:</b> sanguinarine                                                                                                                                                                                                                                       | <a href="#">177, 325, 326</a> |
| Papaveraceae    | <i>Macleaya</i>       | <i>Macleaya microcarpa</i>      |                           | fruits             | <b>PQs:</b> noscapine, (-)-narcotine, ( $\pm$ )- $\beta$ -narcotine, adlumideine, adlumiceine, narceine, normarceine<br><b>1-BIAs:</b> (S)-reticuline, demethylcoclaurine [(+)-higenamine]<br><b>Aporphines:</b> magnoflorine, corydaline<br><b>BBRs:</b> tetrahydropalmatine, phellodendrine, berberine, jatrorrhizine<br><b>Protopines:</b> protopine<br><b>BZPs:</b> sanguinarine, chelerythrine, dihydrosanguinarine, dihydrochelerythrine, oxysanguinarine, 6-acetonylsanguinarine | <a href="#">327</a>           |
|                 |                       | <i>Macleaya cordata</i>         |                           | leaf, stem         | <b>BBRs:</b> berberine<br><b>Protopine:</b> protopine, allocryptopine<br><b>BZPs:</b> sanguinarine, chelerythrine<br><b>BBRs:</b> coptisine, stylopine, berberine, canadine                                                                                                                                                                                                                                                                                                             | <a href="#">328, 329</a>      |
| Papaveraceae    | <i>Stylophorum</i>    | <i>Stylophorum lasiocarpum</i>  |                           | aerial part, roots | <b>Protopines:</b> protopine<br><b>BZPs:</b> sanguinarine, chelerythrine, sanguilutine, chelilutine, sanguirubine, chelirubine, macarpine, chelidonine                                                                                                                                                                                                                                                                                                                                  | <a href="#">330</a>           |
| Lardizabalaceae | <i>Sinofranchetia</i> | <i>Sinofranchetia chinensis</i> |                           | stem               | <b>Aporphines:</b> sinofranine                                                                                                                                                                                                                                                                                                                                                                                                                                                          | <a href="#">331</a>           |
| Proteales       | Nymphaeaceae          | <i>Nelumbo</i>                  | <i>Nelumbo nucifera</i>   | leaves             | <b>1-BIAs:</b> norcoclaurine, coclaurine, norarmepavine, armepavine, lotusine, isolotusine<br><b>bisBIAs:</b> liensinine, isoliensinine, neferine<br><b>Aporphines:</b> nuciferine, nornuciferine, liriodenine, (-)-caaverine, (-)-anonaine, asimilobine, lysicamine, roemerine, pronuciferine, N-methylasimilobine, 7-hydroxydehydronuciferine                                                                                                                                         | <a href="#">332</a>           |
| Sabiaceae       | <i>Sabia</i>          | <i>Sabia yunnanensis</i>        |                           | stems,             | <b>Aporphines:</b> 1-hydroxy-2,3-dimethoxy-6-formyl-6a, 7-                                                                                                                                                                                                                                                                                                                                                                                                                              | <a href="#">333</a>           |

|                |               |                      |                                  |               |                                                                                                                                                                                                                         |                     |
|----------------|---------------|----------------------|----------------------------------|---------------|-------------------------------------------------------------------------------------------------------------------------------------------------------------------------------------------------------------------------|---------------------|
| Sapindales     | Rutaceae      | <i>Phellodendron</i> | <i>Phellodendron amurense</i>    | leaves        | dehydroaporphine                                                                                                                                                                                                        | <a href="#">334</a> |
|                |               |                      |                                  | stems, barks  | <b>Aporphines:</b> magnoflorine, menisperine<br><b>BBRs:</b> phellodendrine, berberine, palmatine, jatrorrhizine, tetrahydrojatrorrhizine                                                                               |                     |
|                | Rutaceae      | <i>Zanthoxylum</i>   | <i>Phellodendron chinense</i>    | bark          | <b>BBRs:</b> berberine                                                                                                                                                                                                  | <a href="#">335</a> |
|                |               |                      | <i>Zanthoxylum integrifolium</i> | root bark     | <b>BZPs:</b> isodecarine, 8-demethyloxchelerythrine, norchelerythrine, oxychelerythrine, decarine, dihydrocherythrinylacetaldehyde, 6-acetonilydihydrochelerythrine                                                     | <a href="#">336</a> |
|                |               |                      | <i>Zanthoxylum nitidium</i>      | roots, leaves | <b>Aporphines:</b> liriodenine<br><b>BZPs:</b> bocconoline, 6 $\beta$ -hydroxymethyldihydrontidine, bocconoline, zanthoxyline, <i>O</i> -methylzanthoxyline, rhoifoline B, <i>N</i> -nomitidine, nitidin, chelerythrine | <a href="#">337</a> |
|                |               |                      | <i>Zanthoxylum schinifolium</i>  | stem bark     | <b>BZPs:</b> norchelerythrine, decarine, 8-hydroxy-9-methoxy-2,3-(methylenedioxy) benzophenanthridine, 6-hydroxydihydrochelerythrine, 6-methoxy-7-hydroxydihydrochelerythrine, oxychelerythrine                         | <a href="#">338</a> |
|                |               |                      | <i>Zanthoxylum heitzii</i>       | bark          | <b>BZPs:</b> dihydrontidine, rhoifoline B, nitidine                                                                                                                                                                     | <a href="#">339</a> |
|                |               |                      | <i>Zanthoxylum myriacanthum</i>  | bark          | <b>BZPs:</b> decarine, rhoifoline B, nitidine                                                                                                                                                                           | <a href="#">340</a> |
|                |               |                      | <i>Zanthoxylum simulans</i>      | root bark     | <b>BZPs:</b> chelerythrine, bocconoline                                                                                                                                                                                 | <a href="#">341</a> |
|                |               |                      | <i>Zanthoxylum tingoassuiba</i>  | root bark     | <b>BBRs:</b> <i>N</i> -methylcanadine<br><b>BZPs:</b> dihydrochelerythrine                                                                                                                                              | <a href="#">342</a> |
| Caryophyllales | Portulacaceae | <i>Portulaca</i>     | <i>Portulaca oleracea</i>        | aerial part   | <b>1-BIAs:</b> oleraisoquinoline                                                                                                                                                                                        | <a href="#">343</a> |
| Cornales       | Cornaceae     | <i>Alangium</i>      | <i>Alangium salviifolium</i>     | leaves        | <b>BBRs:</b> alangiifoliumines A, alangiifoliumines B                                                                                                                                                                   | <a href="#">344</a> |

**Supplementary Table 3. The information of enzymes involved in the biosynthetic pathway of diverse BIAs in Figure 2.**

| Enzyme Abbrev.                                | Enzyme name                                                            | Substrate                                                                          | Product                                    |
|-----------------------------------------------|------------------------------------------------------------------------|------------------------------------------------------------------------------------|--------------------------------------------|
| <b>(i) (S)-norcoclaurine biosynthesis</b>     |                                                                        |                                                                                    |                                            |
| TYDC                                          | tyrosine decarboxylase                                                 | L-tyrosine                                                                         | tyramine                                   |
| PPO                                           | polyphenol oxidases                                                    | tyramine                                                                           | dopamine (DA)                              |
| TH                                            | tyrosine hydroxylase                                                   | L-tyrosine                                                                         | L-3,4-dihydroxyphenylalanine (L-DOPA)      |
| DODC                                          | dopa decarboxylase                                                     | L-3,4-dihydroxyphenylalanine (L-DOPA)                                              | dopamine (DA)                              |
| TyrAT                                         | tyrosine aminotransferase                                              | L-tyrosine                                                                         | 4-hydroxyphenylpyruvate                    |
| 4HPPDC                                        |                                                                        | 4-hydroxyphenylpyruvate                                                            | 4-Hydroxyphenylacetaldehyde (4-HPAA)       |
| NCS                                           | norcoclaurine synthase                                                 | Dopamine and 4-Hydroxyphenyl acetaldehyde or 3,4-Dihydroxyphenyl acetaldehyde      | (S)-Norcoclaurine or (S)-Norlaudanoline    |
| <b>(ii) (S)-reticuline biosynthesis</b>       |                                                                        |                                                                                    |                                            |
| 6OMT                                          | norcoclaurine 6- <i>O</i> -methyltransferase                           | (S)-norcoclaurine                                                                  | (S)-coclaurine                             |
| CNMT                                          | <i>coclaurine N</i> -methyltransferase                                 | (S)-coclaurine                                                                     | (S)- <i>N</i> -methylcoclaurine            |
| NMCH/CYP80B                                   | (S)- <i>N</i> -methylcoclaurine 3'-hydroxylase                         | (S)- <i>N</i> -methylcoclaurine                                                    | (S)-3'-hydroxy- <i>N</i> -methylcoclaurine |
| 4'OMT                                         | 3'-hydroxy- <i>N</i> -methylcoclaurine 4'- <i>O</i> -methyltransferase | (S)-3'-hydroxy- <i>N</i> -methylcoclaurine                                         | (S)-reticuline                             |
| <b>(iii) papaverine (1-BIAs) biosynthesis</b> |                                                                        |                                                                                    |                                            |
| CoCH*                                         |                                                                        | (S)-coclaurine                                                                     | (S)-3'-hydroxycoclaurine                   |
| 4'OMT*                                        |                                                                        | (S)-3'-hydroxycoclaurine                                                           | (S)-norreticuline                          |
| N7OMT                                         | reticuline 7- <i>O</i> -methyltransferase                              | (S)-norreticuline                                                                  | (S)-norlaudanine                           |
| 3'OMT*                                        |                                                                        | (S)-norlaudanine                                                                   | (S)-tetrahydropapaverine                   |
| DBOX                                          | dihydrobenzophenanthridine oxidase                                     | Dihydrosanguinarine, ( <i>RS</i> )-tetrahydropapaverine, or ( <i>RS</i> )-canadine | sanguinarine, papaverine, or berberine     |
| <b>(iv) morphinans biosynthesis</b>           |                                                                        |                                                                                    |                                            |
| REPI/STORR                                    | reticuline epimerase                                                   | (S)-reticuline                                                                     | ( <i>R</i> )-reticuline                    |
| PsCYP719B1                                    | salutaridine synthase                                                  | ( <i>R</i> )-reticuline                                                            | salutaridine                               |
| MdCYP80G10                                    | sinoacutine synthase                                                   | (S)-reticuline                                                                     | sinoacutine                                |
| SalR                                          | salutaridine reductase                                                 | salutaridine                                                                       | salutaridinol                              |
| SalAT                                         | salutaridinol 7- <i>O</i> -acetyltransferase                           | salutaridinol                                                                      | salutaridinol 7- <i>O</i> -acetate         |
| THS                                           | thebaine synthase                                                      | salutaridinol 7- <i>O</i> -acetate                                                 | thebaine                                   |
| T6ODM                                         | thebaine 6- <i>O</i> -demethylase                                      | thebaine or oripavine                                                              | codeinone or morphinone                    |
| CODM                                          | codeine O-demethylase                                                  | thebaine or codeine                                                                | oripavine or morphine                      |
| COR                                           | codeinone reductase                                                    | codeinone or morphinone                                                            | codeine or morphine                        |
| <b>(v) berberine (BBRs) biosynthesis</b>      |                                                                        |                                                                                    |                                            |
| BBE                                           | berberine bridge enzyme                                                | (S)-reticuline                                                                     | (S)-scoulerine                             |
| 9OMT                                          | scoulerine 9- <i>O</i> -                                               | (S)-scoulerine                                                                     | (S)-tetrahydrocolumbamine                  |

|                                                             |                                                                          |                                                                                                                |                                                                                                                              |
|-------------------------------------------------------------|--------------------------------------------------------------------------|----------------------------------------------------------------------------------------------------------------|------------------------------------------------------------------------------------------------------------------------------|
|                                                             | methyltransferase                                                        |                                                                                                                |                                                                                                                              |
| CYP719A                                                     | canadine synthase                                                        | ( <i>S</i> )-scoulerine, ( <i>S</i> )-tetrahydrocolumbamine, or ( <i>S</i> )-cheilanthifoline                  | ( <i>S</i> )-cheilanthifoline, ( <i>S</i> )-tetrahydroberberine (canadine), or ( <i>S</i> )-stylophine berberine,            |
| BBE-like (THBO/STOX)                                        | ( <i>S</i> )-tetrahydroberberine oxidase                                 | canadine, cheilanthifoline, cavidine, or stylophine                                                            | dehydrochilanthifoline, dehydrocavidine, or coptisine                                                                        |
| <b>(vi) noscapine (PQs) biosynthesis</b>                    |                                                                          |                                                                                                                |                                                                                                                              |
| TNMT                                                        | <i>N</i> -methyltransferase                                              | ( <i>S</i> )-canadine, or stylophine                                                                           | ( <i>S</i> )- <i>N</i> -methylcanadine, or ( <i>S</i> )- <i>N</i> -methylstylophine                                          |
| CY82Y1                                                      | 1-hydroxy- <i>N</i> -methylcanadine synthase                             | ( <i>S</i> )- <i>N</i> -methylcanadine                                                                         | 1-hydro- <i>N</i> -methylcanadine                                                                                            |
| CYP82X2                                                     | 1-hydroxy- <i>N</i> -methylcanadine 13-hydroxylase                       | 1-dihydro- <i>N</i> -methylcanadine                                                                            | 1,13-dihydro- <i>N</i> -methylcanadine                                                                                       |
| AT1                                                         | 1,13-dihydroxy- <i>N</i> -methylcanadine 13- <i>O</i> -acetyltransferase | 1,13-dihydro- <i>N</i> -methylcanadine                                                                         | 1-hydroxyl-13- <i>O</i> -acetyl- <i>N</i> -methylcanadine                                                                    |
| CYP82X1                                                     | 1-hydroxy-13- <i>O</i> -acetyl- <i>N</i> -methylcanadine 8-hydroxylase   | 1-hydroxyl-13- <i>O</i> -acetyl- <i>N</i> -methylcanadine                                                      | 1,8-dihydroxyl-13- <i>O</i> -acetyl- <i>N</i> -methylcanadine                                                                |
| PsOMT2:<br>PsOMT3<br>heterodimer                            | 4'- <i>O</i> -methyltransferase                                          | 4'- <i>O</i> -desmethyl-3- <i>O</i> -acetylpapaveroxine                                                        | 3- <i>O</i> -acetylpapaveroxine                                                                                              |
| CXE1                                                        | 3- <i>O</i> -acetylpapaveroxine carboxylesterase                         | 3- <i>O</i> -acetylpapaveroxine                                                                                | narcotine hemiacetal                                                                                                         |
| SDR1                                                        | noscapine synthase/ hort-chain dehydrogenase/reductase                   | narcotine hemiacetal                                                                                           | noscapine                                                                                                                    |
| <b>(vii) protopine and sanguinarine (BZPs) biosynthesis</b> |                                                                          |                                                                                                                |                                                                                                                              |
| CYP82N4 (MSH)                                               | ( <i>S</i> )- <i>N</i> -methylstylophine 14-hydroxylase                  | ( <i>S</i> )- <i>N</i> -methylcanadine or ( <i>S</i> )- <i>N</i> -methylstylophine                             | protopine or allocryptopinem                                                                                                 |
| CYP82N3 (P6H)                                               | protopine 6-hydroxylase                                                  | protopine or allocryptopinem                                                                                   | dihydrosanguinarine or dihydrochelerythrine                                                                                  |
| DBOX                                                        | dihydrobenzophenanthridine oxidase                                       | dihydrosanguinarine or dihydrochelerythrine                                                                    | sanguinarine or chelerythrine                                                                                                |
| <b>(viii) bisBIA and aporphine biosynthesis</b>             |                                                                          |                                                                                                                |                                                                                                                              |
| CYP80A/CYP80Q                                               | berbamunine synthase                                                     | ( <i>S</i> )-coclaurine, ( <i>R</i> )- <i>N</i> -methylcoclaurine and ( <i>S</i> )- <i>N</i> -methylcoclaurine | ( <i>R,S</i> )-berbamunine, ( <i>R,S</i> )-2'-norberbamunine, and ( <i>R,R</i> )-guattegaumerine, nelumborine, nelumboferine |
| CYP80G/CYP80Q                                               | ( <i>S</i> )-Corytuberine synthase                                       | <i>N</i> -methylcoclaurine, ( <i>S</i> )-reticurine                                                            | glaziovine, ( <i>S</i> )-corytuberine                                                                                        |
| RNMT                                                        | reticuline <i>N</i> -methyltransferase                                   | ( <i>S</i> )-corytuberine                                                                                      | magnoflorine                                                                                                                 |
| TfPavNMT                                                    | pavine <i>N</i> -methyltransferase                                       | ( <i>S</i> )-corytuberine                                                                                      | magnoflorine                                                                                                                 |

\* The asterisk indicates uncharacterized gene.

**Supplementary Table 10. The list information of the titers of BIAs in yeast and bacteria as the chassis cells in recent years.**

| Host                             | Substrate      | Product                         | Titer        | Reference           |
|----------------------------------|----------------|---------------------------------|--------------|---------------------|
| <i>E. coli</i>                   | Dopamine       | (S)-reticuline                  | 55 mg/L      | <a href="#">345</a> |
| <i>E. coli</i>                   | Dopamine       | (S)-reticuline                  | 54 mg/L      | <a href="#">346</a> |
| <i>E. coli</i>                   | <i>De novo</i> | (S)-reticuline                  | 46 mg/L      | <a href="#">347</a> |
| <i>E. coli</i>                   | <i>De novo</i> | (S)-reticuline                  | 163.5 mg/L   | <a href="#">348</a> |
| <i>E. coli</i>                   | <i>De novo</i> | (S)-reticuline                  | 307 mg/L     | <a href="#">349</a> |
| <i>S. cerevisiae</i>             | Norlaudanoline | (S)-reticuline                  | 150 mg/L     | <a href="#">350</a> |
| <i>S. cerevisiae</i>             | <i>De novo</i> | (S)-reticuline                  | 80.6 µg/L    | <a href="#">351</a> |
| <i>S. cerevisiae</i>             | <i>De novo</i> | (S)-reticuline                  | 19.2 µg/L    | <a href="#">352</a> |
| <i>S. cerevisiae</i>             | <i>De novo</i> | (S)-reticuline                  | 4.6 g/L      | <a href="#">353</a> |
| <i>S. cerevisiae</i>             | <i>De novo</i> | terahydropapaverine             | 121 µg/L     | <a href="#">354</a> |
| <i>S. cerevisiae</i>             | Norlaudanoline | salutaridine                    | 20 mg/L      | <a href="#">350</a> |
| <i>S. cerevisiae</i>             | Thebaine       | hydrocodone                     | 51 mg/L      | <a href="#">355</a> |
| <i>S. cerevisiae</i>             | Thebaine       | oxycodone                       | 70 mg/L      | <a href="#">355</a> |
| <i>S. cerevisiae</i>             | Thebaine       | dihydrocodeine                  | 10 mg/L      | <a href="#">355</a> |
| <i>S. cerevisiae</i>             | <i>De novo</i> | thebaine                        | 6.4 µg/L     | <a href="#">356</a> |
| <i>S. cerevisiae</i>             | <i>De novo</i> | hydrocodone                     | 0.3 mg/L     | <a href="#">356</a> |
| <i>E. coli</i>                   | <i>De novo</i> | thebaine                        | 2.1 mg/L     | <a href="#">357</a> |
| <i>E. coli</i>                   | <i>De novo</i> | hydrocodone                     | 0.36 mg/L    | <a href="#">357</a> |
| <i>S. cerevisiae</i>             | Norlaudanoline | (S)-canadine                    | 30 mg/L      | <a href="#">350</a> |
| <i>S. cerevisiae</i>             | Norlaudanoline | stylophine                      | 676 µg/L     | <a href="#">358</a> |
| <i>S. cerevisiae</i>             | Norlaudanoline | cis- <i>N</i> -methylstylophine | 548 µg/L     | <a href="#">358</a> |
| <i>S. cerevisiae</i>             | Norlaudanoline | protopine                       | 252 µg/L     | <a href="#">358</a> |
| <i>S. cerevisiae</i>             | Norlaudanoline | sanguinarine                    | 80 µg/L      | <a href="#">358</a> |
| <i>S. cerevisiae</i>             | Norlaudanoline | (S)-canadine                    | 1.8 mg/L     | <a href="#">359</a> |
| <i>S. cerevisiae</i>             | Norlaudanoline | berberine                       | 39 µg/L      | <a href="#">359</a> |
| <i>S. cerevisiae</i>             | <i>De novo</i> | berberine                       | 1.08 mg/L    | <a href="#">360</a> |
| <i>S. cerevisiae</i>             | <i>De novo</i> | stylophine                      | 32 mg/L      | <a href="#">361</a> |
| <i>S. cerevisiae</i>             | Norlaudanoline | noscaphine                      | 1.64±0.38 mM | <a href="#">362</a> |
| <i>S. cerevisiae</i>             | <i>De novo</i> | noscaphine                      | 2.2 mg/L     | <a href="#">363</a> |
| <i>S. cerevisiae</i>             | <i>De novo</i> | guattegaumerine                 | 108 mg/L     | <a href="#">364</a> |
| <i>S. cerevisiae</i>             | <i>De novo</i> | berbamunine                     | 25.4 mg/L    | <a href="#">364</a> |
| <i>E. coli and S. cerevisiae</i> | Dopamine       | magnoflorine                    | 7.2 mg/L     | <a href="#">345</a> |





## Reference

1. A. Capasso, N. De Tommasi, L. Rastrelli and F. De Simone, *Phytother. Res.*, 2000, **14**, 653-655.
2. L. Rastrelli, A. Capasso, C. Pizza, N. DeTommasi and L. Sorrentino, *J. Nat. Prod.*, 1997, **60**, 1065-1069.
3. C. Li and M.-H. Wang, *Korean Journal of Plant Resources*, 2014, **27**, 223-228.
4. M. L. Ferreira, I. C. de Pascoli, I. R. Nascimento, J. Zukerman-Schpector and L. M. Lopes, *Phytochemistry*, 2010, **71**, 469-478.
5. W. Salleh, N. Abdullah, N. A. Hashim, H. Y. Khong and S. Khamis, *Bol. Latinoam. Caribe Plant. Med. Aromat.*, 2019, **18**, 527-532.
6. H. Jaggy and H. Achenbach, *Planta Med.*, 1992, **58**, 111.
7. Y. K. Zheng, B. J. Su, Y. Q. Wang, H. S. Wang, H. B. Liao and D. Liang, *J. Nat. Prod.*, 2021, **84**, 1316-1325.
8. G. C. L. Ee, C. M. Lim, C. K. Lim, M. Rahmani, K. Shaari and C. F. J. Bong, *Nat. Prod. Res.*, 2009, **23**, 1416-1423.
9. D. D. Zhang, J. Yang, J. F. Luo, X. N. Li, C. L. Long and Y. H. Wang, *J. Asian Nat. Prod. Res.*, 2018, **20**, 734-743.
10. A. Zahari, A. Ablat, N. Omer, M. A. Nafiah, Y. Sivasothy, J. Mohamad, M. N. Khan and K. Awang, *Sci. Rep.*, 2016, **6**, 21517.
11. A. Zahari, A. Ablat, Y. Sivasothy, J. Mohamad, M. I. Choudhary and K. Awang, *Asian Pac. J. Trop. Med.*, 2016, **9**, 320-324.
12. M. A. Nafiah, M. R. Mukhtar, H. Omar, K. Ahmad, H. Morita, M. Litaudon, K. Awang and A. H. Hadi, *Molecules*, 2011, **16**, 3402-3409.
13. C. Stevigny, S. Block, M. C. De Pauw-Gillet, E. de Hoffmann, G. Llabres, V. Adjakidje and J. Quetin-Leclercq, *Planta Med.*, 2002, **68**, 1042-1044.
14. T. H. Tsai, G. J. Wang and L. C. Lin, *J. Nat. Prod.*, 2008, **71**, 289-291.
15. F. F. Masnon, N. P. S. Hassan and F. Ahmad, *Nat. Prod. Commun.*, 2014, **9**, 31-32.
16. S. S. Lee, Y. C. Liu and C. H. Chen, *Gaoxiong Yi Xue Ke Xue Za Zhi* 1989, **5**, 637-641.
17. Y. Suzuki, Y. Saito, M. Goto, D. J. Newman, B. R. O'Keefe, K. H. Lee and K. Nakagawa-Goto, *J. Nat. Prod.*, 2017, **80**, 220-224.
18. W. Othman, Y. Sivasothy, S. Y. Liew, J. Mohamad, M. A. Nafiah, K. Ahmad, M. Litaudon and K. Awang, *Phytochem. Lett.*, 2017, **21**, 230-236.
19. W. Othman, F. Salim, A. Zahari, K. Awang and N. H. Ismail, *Biochem. Syst. Ecol.*, 2023, **109**, 104667.
20. Y. L. Liu, Y. Wang, X. R. He, L. S. Gan, F. Xu, Y. J. Xu, X. N. Wang, T. Shen and Z. W. Zhou, *Fitoterapia*, 2022, **156**, 105086.
21. A. Zahari, F. K. Cheah, J. Mohamad, S. N. Sulaiman, M. Litaudon, K. H. Leong and K. Awang, *Planta Med.*, 2014, **80**, 599-603.
22. J. J. Yang, Y. Chen, M. L. Guo and G. X. Chou, *J Nat Med*, 2020, **74**, 441-447.
23. Q. Z. Zhao, Y. M. Zhao and K. J. Wang, *J. Ethnopharmacol.*, 2006, **106**, 408-413.
24. C. F. Zhang, N. Nakamura, S. Tewtrakul, M. Hattori, Q. S. Sun, Z. T. Wang and T. Fujiwara, *Chem. Pharm. Bull.*, 2002, **50**, 1195-1200.
25. H. Z. Jiang, T. Gan, Y. N. Li, C. Y. Du, J. L. Li, J. T. Fan and R. Tan, *Pharmacogn Mag.*, 2019, **15**, 736-739.
26. R. L. Huang, C. C. Chen, Y. L. Huang, J. C. Ou, C. P. Hu, C. F. Chen and C. Chang, *Planta Med.*, 1998, **64**, 212-215.
27. H. D. Nguyen, V. K. Nguyen, N. K. T. Pham, J. Sichaem and T. H. Duong, *Nat. Prod. Res.*, 2021, **35**, 1122-1126.
28. H. Z. Jiang, *Pharm. Chem. J.*, 2022, **56**, 101-104.
29. B. Tang, H. Tu, H. A. Long, J. Du, J. M. Guo, H. J. Liu, X. Hu, L. Yang and X. Du, *J. Asian Nat. Prod. Res.*, 2017, **19**, 941-945.
30. S. Y. Zhang, Q. Zhang, Q. Guo, Y. F. Zhao, X. L. Gao, X. Y. Chai and P. F. Tu, *J. Sep. Sci.*, 2015, **38**, 2614-2624.
31. R. Liu, H. C. Zhang, F. Zhou, R. M. Wang, Q. Tu and J. Y. Wang, *Biochem. Syst. Ecol.*, 2013, **50**, 293-295.
32. Y. F. Tan, R. Q. Wang, W. T. Wang, Y. Wu, N. Ma, W. Y. Lu, Y. Zhang and X. P. Zhang, *Pharm. Biol.*, 2021, **59**, 884-892.
33. J. H. Yang, L. Li, Y. S. Wang, J. F. Zhao, H. B. Zhang and S. D. Luo, *Helv. Chim. Acta*, 2005, **88**, 2523-2526.
34. S. N. Sulaiman, M. R. Mukhtar, A. H. A. Hadi, K. Awang, H. Hazni, A. Zahari, M. Litaudon,

- K. Zaima and H. Morita, *Molecules*, 2011, **16**, 3119-3127.
35. D. S. Bhakuni and S. Gupta, *Planta Med.*, 1983, **48**, 52-54.
  36. F. R. Garcez, A. F. G. da Silva, W. S. Garcez, G. Linck, M. D. C. Matos, E. C. S. Santos and L. M. M. Queiroz, *Planta Med.*, 2011, **77**, 383-387.
  37. G. A. Elizabeth and C. S. L. Enrique, *Nat. Prod. Res.*, 2018, **32**, 195-201.
  38. A. F. Silva, M. F. C. Santos, T. S. C. Maiolini, P. P. O. Salem, M. Murgu, A. C. C. Paula, E. O. Silva, K. J. Nicácio, A. G. Ferreira, D. F. Dias, M. G. Soares and D. A. Chagas-Paula, *Phytochem. Lett.*, 2021, **42**, 52-60.
  39. L. C. Morais, J. M. Barbosa-Filho and R. N. Almeida, *J. Ethnopharmacol.*, 1998, **62**, 57-61.
  40. B. N. Zhou, R. K. Johnson, M. R. Mattern, X. Wang, S. M. Hecht, H. T. Beck, A. Ortiz and D. G. Kingston, *J. Nat. Prod.*, 2000, **63**, 217-221.
  41. L. C. Pabon and L. E. Cuca, *Quim. Nova*, 2010, **33**, 875-879.
  42. L. de Freitas, M. Valli, A. C. Dametto, P. C. Pennacchi, A. D. Andricopulo, S. S. Maria-Engler and V. S. Bolzani, *J. Nat. Prod.*, 2020, **83**, 649-656.
  43. H. Barbosa, T. A. Costa-Silva, G. A. A. Conserva, A. J. Araujo, A. L. L. Lordello, G. M. Antar, M. Amaral, M. G. Soares, A. G. Tempone and J. H. G. Lago, *Chem. Biodiversity*, 2021, **18**, e2001022.
  44. R. S. Conceição, I. M. A. Reis, A. P. M. Cerqueira, C. J. Perez, M. C. dos Santos, A. Branco, D. R. Ifa and M. B. Botura, *Phytochem. Anal.*, 2020, **31**, 711-721.
  45. W. S. Garcez, M. Yoshida and O. R. Gottlieb, *Phytochemistry*, 1995, **39**, 815-816.
  46. H. Omar, N. M. Hashim, A. Zajmi, N. Nordin, S. I. Abdelwahab, A. H. Azizan, A. H. Hadi and H. M. Ali, *Molecules*, 2013, **18**, 8994-9009.
  47. H. Omar, M. Fadaeinasab, H. Taha, A. Widyawaruyanti, M. A. Nafiah and T. Rachmatiah, *J. Asian Nat. Prod. Res.*, 2020, **22**, 52-60.
  48. A. Zahari, F. K. Cheah, J. Mohamad, S. N. Sulaiman, M. Litaudon, K. H. Leong and K. Awang, *Planta Med.*, 2014, **80**, 599-603.
  49. M. S. Buchanan, A. R. Carroll, D. Pass and R. J. Quinn, *Nat. Prod. Commun.*, 2007, **2**, 255-259.
  50. Y. Cao, X. L. Gao, G. Z. Su, X. L. Yu, P. F. Tu and X. Y. Chai, *Chem. Biodiversity*, 2015, **12**, 1443-1465.
  51. M. Lavault, M. M. Debray and J. Bruneton, *Planta Med.*, 1981, **42**, 50-54.
  52. C. Y. Wei, S. W. Wang, J. W. Ye, T. L. Hwang, M. J. Cheng, P. J. Sung, T. H. Chang and J. J. Chen, *Molecules*, 2018, **23**, 2286.
  53. I. S. Chen, J. J. Chen, C. Y. Duh, I. L. Tsai and C. T. Chang, *Planta Med.*, 1997, **63**, 154-157.
  54. C. Y. Wei, S. W. Wang, J. W. Ye, T. L. Hwang, M. J. Cheng, P. J. Sung, T. H. Chang and J. J. Chen, *Molecules*, 2018, **23**, 2286.
  55. G. G. Leitao, N. K. Simas, S. S. Soares, A. P. de Brito, B. M. Claros, T. B. Brito and F. Delle Monache, *J. Ethnopharmacol.*, 1999, **65**, 87-102.
  56. I. S. Chen, J. J. Chen and I. L. Tsai, *Phytochemistry*, 1995, **40**, 983-986.
  57. P. Rasoanaivo, S. Ratsimamanga-Urverg, H. Rafatro, D. Ramanitrahasimbola, G. Palazzino, C. Galeffi and M. Nicoletti, *Planta Med.*, 1998, **64**, 58-62.
  58. Y. C. Ge, H. J. Zhang, K. W. Wang and X. F. Fan, *Phytochemistry*, 2018, **154**, 73-76.
  59. X. J. Li, J. W. Dong, D. Gan, D. J. Zhou, X. Y. Cai, L. Cai and Z. T. Ding, *Nat. Prod. Res.*, 2021, **35**, 763-769.
  60. J. J. Chen, H. C. Hung, P. J. Sung, I. S. Chen and W. L. Kuo, *Phytochemistry*, 2011, **72**, 523-532.
  61. C. H. Huang, Y. Y. Chan, P. C. Kuo, Y. F. Chen, R. J. Chang, I. S. Chen, S. J. Wu and T. S. Wu, *Int. J. Mol. Sci.*, 2014, **15**, 13424-13436.
  62. M. Y. Jiang, X. Y. Pu, W. T. Li, J. Liu, X. L. Zeng, H. R. Li, X. S. Bai, L. Hu and X. Z. Huang, *Nat. Prod. Res.*, 2022, **38**, 1230-1237.
  63. P. O'Brien, C. Carrasco-Pozo and H. Speisky, *Chem.-Biol. Interact.*, 2006, **159**, 1-17.
  64. G. G. Leitao, S. S. V. Soares, T. D. M. Brito and F. Delle Monache, *Phytochemistry*, 2000, **55**, 679-682.
  65. G. Marti, V. Eparvier, B. Morleo, J. Le Ven, C. Apel, B. Bodo, S. Amand, V. Dumontet, O. Lozach, L. Meijer, F. Gueritte and M. Litaudon, *Molecules*, 2013, **18**, 3018-3027.
  66. C. Y. Chen, S. Y. Chen and C. H. Chen, *Process Biochem.*, 2012, **47**, 1460-1468.
  67. P. T. Ninh, T. Q. Bui, N. T. Dung, T. V. Sung, T. T. P. Thao, C. T. T. Ha, B. V. Thanh, T. V. Chien, P. T. Quy, N. T. Triet, N. M. Thai and N. T. A. Nhung, *Nat. Prod. Commun.*, 2023, **18**, 1934578X231176926.
  68. Y. Shen, C. G. Li, S. F. Zhou, E. C. K. Pang, D. F. Story and C. C. L. Xue, *Curr. Med. Chem.*,

- 2008, **15**, 1616-1627.
69. T. Kametani and H. Yagi, *Chem. Pharm. Bull.*, 1966, **14**, 78-82.
  70. S. M. Mohamed, E. M. Hassan and N. A. Ibrahim, *Nat. Prod. Res.*, 2010, **24**, 1395-1402.
  71. H. S. Chang, M. J. Cheng and I. S. Chen, *Helv. Chim. Acta*, 2011, **94**, 703-710.
  72. R. Y. Yan, W. H. Wang, J. Guo, H. L. Liu, J. Y. Zhang and B. Yang, *Molecules*, 2013, **18**, 7739-7750.
  73. L. S. Mori, S. Boller, C. A. L. Kassuya, M. Stefanello and A. R. Zampronio, *Phytomedicine*, 2011, **18**, 143-147.
  74. W. J. Cheng, Y. Yao, Q. X. Wang, X. S. Chang, Z. L. Shi, X. T. Fang, F. F. Chen, S. X. Chen, Y. H. Zhang, F. Zhang, D. Q. Zhu, Z. X. Deng and L. Lu, *Plant J.*, 2022, **112**, 535-548.
  75. C. Y. Chen, C. L. Kao, W. J. Li, H. C. Chen and H. T. Li, *Chem. Nat. Compd.*, 2018, **54**, 509-511.
  76. B. Melzer and F. Bracher, *Org. Biomol. Chem.*, 2015, **13**, 7664-7672.
  77. I. Park and M. Na, *Nat. Prod. Sci.*, 2020, **26**, 171-175.
  78. R. Graziose, T. Rathinasabapathy, C. Lategan, A. Poulev, P. J. Smith, M. Grace, M. A. Lila and I. Raskin, *J. Ethnopharmacol.*, 2011, **133**, 26-30.
  79. B. S. M. Al Kazman, J. E. Harnett and J. R. Hanrahan, *Int. J. Mol. Sci.*, 2023, **24**, 2294.
  80. M. You, D. B. Wickramaratne, G. L. Silva, H. Chai, T. E. Chagwedera, N. R. Farnsworth, G. A. Cordell, A. D. Kinghorn and J. M. Pezzuto, *J. Nat. Prod.*, 1995, **58**, 598-604.
  81. M. Martinez-Vazquez, D. Lozano, R. Estrada-Reyes, N. M. Gonzalez-Lugo, T. R. Apan and G. Heinze, *Fitoterapia*, 2005, **76**, 733-736.
  82. G. Rocha, L. M. Dutra, W. H. P. Paz, F. M. A. da Silva, E. V. Costa and J. Almeida, *Biochem. Syst. Ecol.*, 2021, **97**, 104297.
  83. M. Pena-Hidalgo, L. C. Furtado, L. V. Costa-Lotufu, M. J. P. Ferreira and D. Santos, *Rev. Bras. Farmacogn.*, 2021, **31**, 244-248.
  84. S. F. Tsai and S. S. Lee, *J. Nat. Prod.*, 2010, **73**, 1632-1635.
  85. M. V. N. Rinaldi, I. E. C. Diaz, I. B. Suffredini and P. R. H. Moreno, *Rev. Bras. Farmacogn.*, 2017, **27**, 77-83.
  86. C. Rodrigues, L. M. Dutra, A. Barison, E. V. Costa and J. Almeida, *Biochem. Syst. Ecol.*, 2016, **69**, 222-225.
  87. M. Castro-Moreno, C. L. Tinoco-Ojanguren, M. D. Cruz-Ortega and A. R. Gonzalez-Esquinca, *J. Plant Res.*, 2013, **126**, 529-537.
  88. A. Matsushige, Y. Kotake, K. Matsunami, H. Otsuka, S. Ohta and Y. Takeda, *Chem. Pharm. Bull.*, 2012, **60**, 257-259.
  89. C. Y. Chen, C. L. Kao, H. C. Yeh, H. T. Li, M. D. Wu and M. J. Cheng, *Chem. Nat. Compd.*, 2021, **57**, 500-502.
  90. F. R. Chang, J. L. Wei, C. M. Teng and Y. C. Wu, *J. Nat. Prod.*, 1998, **61**, 1457-1461.
  91. J. C. Ontiveros-Rodríguez, E. Burgueño-Tapia, J. Porras-Ramírez, P. Joseph-Nathan and L. G. Zepeda, *Nat. Prod. Commun.*, 2018, **13**, 831-836.
  92. M. d. Q. Paulo, J. M. Barbosa-Filho, E. O. Lima, R. F. Maia, R. d. C. Barbosa and M. A. Kaplan, *J. Ethnopharmacol.*, 1992, **36**, 39-41.
  93. J. M. Lima, G. M. Leme, E. V. Costa and Q. B. Cass, *J. Chromatogr. B. Analyt. Technol. Biomed. Life Sci.*, 2021, **1164**, 122493.
  94. F. R. Campos, R. L. Batista, C. L. Batista, E. V. Costa, A. Barison, A. G. dos Santos and M. L. B. Pinheiro, *Biochem. Syst. Ecol.*, 2008, **36**, 804-806.
  95. E. F. Queiroz, F. Roblot, A. Cave, M. D. Paulo and A. Fournet, *J. Nat. Prod.*, 1996, **59**, 438-440.
  96. Y. Kotake, K. Okuda, M. Kamizono, N. Matsumoto, T. Tanahashi, H. Hara, D. Caparros-Lefebvre and S. Ohta, *J. Chromatogr. B. Analyt. Technol. Biomed. Life Sci.*, 2004, **806**, 75-78.
  97. Y. L. Yang, F. R. Chang and Y. C. Wu, *Helv. Chim. Acta*, 2004, **87**, 1392-1399.
  98. D. K. Yadav, N. Singh, K. Dev, R. Sharma, M. Sahai, G. Palit and R. Maurya, *Fitoterapia*, 2011, **82**, 666-675.
  99. A. Matsushige, Y. Kotake, K. Matsunami, H. Otsuka, S. Ohta and Y. Takeda, *Chem. Pharm. Bull.*, 2012, **60**, 257-259.
  100. N. V. Huynh, D. M. N. Huu, N. T. Huynh, D. H. Chau, C. D. Nguyen, Q. D. N. Truong, D. T. Mai and P. H. Dang, *Z. Naturforsch. C. J. Biosci.*, 2023, **78**, 247-251.
  101. B. Avula, J. Y. Bae, T. Majrashi, T. Y. Wu, Y. H. Wang, M. Wang, Z. Ali, Y. C. Wu and I. A. Khan, *J. Pharm. Biomed. Anal.*, 2018, **159**, 548-566.
  102. Q. Zhou, Y. H. Fu, X. B. Li, G. Y. Chen, S. Y. Wu, X. P. Song, Y. P. Liu and C. R. Han, *Phytochem. Lett.*, 2015, **11**, 296-300.

103. D. Cortes, M. Y. Torrero, M. Pilar D'Ocon, M. Luz Candenias, A. Cave and A. H. Hadi, *J. Nat. Prod.*, 1990, **53**, 503-508.
104. Y. P. Liu, T. W. Wang, Z. Xie, Y. Bian, Y. Y. Liu, R. Q. Guan, Z. Y. Liu, L. Qiang, G. Y. Chen and Y. H. Fu, *J. Nat. Prod.*, 2021, **84**, 3117-3121.
105. V. W. N. Chimeze, E. E. Bankoglu, S. Zühlke, V. S. Fannang, D. Eckelmann, J. C. Shirri, E. N. Djuidje, C. M. Djama, H. Stopper and J. Wandji, *Nat. Prod. Res.*, 2022, **36**, 2791-2799.
106. P. C. Nam, N. Q. Trung, N. T. Hoa, H. N. Bich, T. D. Manh, D. T. Quang, A. Mechler and Q. V. Vo, *RSC Adv.*, 2022, **12**, 9738-9743.
107. T. J. Hsieh, F. R. Chang, Y. C. Chia, C. Y. Chen, H. C. Lin, H. F. Chiu and Y. C. Wu, *J. Nat. Prod.*, 2001, **64**, 1157-1161.
108. E. M. K. Wijeratne, Y. Hatanaka, T. Kikuchi, Y. Tezuka and A. A. L. Gunatilaka, *Phytochemistry*, 1996, **42**, 1703-1706.
109. E. R. Soares, F. M. A. da Silva, R. A. de Almeida, B. R. de Lima, F. A. da Silva, A. Barison, H. H. F. Koolen, M. L. B. Pinheiro and A. D. L. de Souza, *Phytochem. Anal.*, 2015, **26**, 339-345.
110. R. Chokchaisiri, W. Chaichompoo, R. Chalermglin and A. Suksamrarn, *Rec. Nat. Prod.*, 2015, **9**, 243-246.
111. Z. X. Yu, C. Han, X. P. Song, G. Y. Chen and J. X. Chen, *Bioorg. Chem.*, 2019, **90**, 103069.
112. S. Hongthong, C. Kuhakarn, V. Reutrakul, S. Jariyawat, P. Piyachaturawat, N. Nuntasaeen and T. Jaipetch, *Nat. Prod. Commun.*, 2014, **9**, 929-932.
113. E. G. Perez and B. K. Cassels, *Alkaloids Chem. Biol.*, 2010, **68**, 83-156.
114. C. A. Carollo, J. M. de Siqueira, W. S. Garcez, R. Diniz and N. G. Fernandes, *J. Nat. Prod.*, 2006, **69**, 1222-1224.
115. D. S. Alves, V. A. Costa, A. R. T. Machado, D. F. Oliveira and G. A. Carvalho, *Crop Prot.*, 2020, **127**, 104965.
116. J. Almeida, J. T. de Lima, H. R. de Oliveira, M. R. de Oliveira, P. R. M. Meira, A. Lucio, J. M. Barbosa and L. J. Quintans, *Nat. Prod. Res.*, 2011, **25**, 1908-1915.
117. H. C. Brastianos, C. M. Sturgeon, M. Roberge and R. J. Andersen, *J. Nat. Prod.*, 2007, **70**, 287-288.
118. C. A. S. de Souza, V. B. Nardelli, W. H. P. Paz, M. L. B. Pinheiro, A. Rodrigues, L. M. Bomfim, M. B. P. Soares, D. P. Bezerra, J. D. Chaar, H. H. F. Koolen, F. M. A. da Silva and E. V. Costa, *Quim. Nova*, 2020, **43**, 1397-1403.
119. W. H. P. Paz, R. N. de Oliveira, G. Heerdt, C. F. F. Angolini, L. S. de Medeiros, V. R. Silva, L. S. Santos, M. B. P. Soares, D. P. Bezerra, N. H. Morgon, J. Almeida, F. M. A. da Silva, E. V. Costa and H. H. F. Koolen, *J. Nat. Prod.*, 2019, **82**, 2220-2228.
120. I. M. Fechine, M. A. Lima, V. R. Navarro, E. V. L. d. Cunha, M. S. Silva, J. M. Barbosa-Filho and J. G. S. Maia, *Rev. Bras. Farmacogn.*, 2002, **12**, 17-19.
121. E. G. Perez, J. Saez and B. K. Cassels, *J. Chil. Chem. Soc.*, 2005, **50**, 553-557.
122. N. Nordin, N. A. Majid, N. M. Hashim, M. A. Rahman, Z. Hassan and H. M. Ali, *Drug Design Development and Therapy*, 2015, **9**, 1437-1448.
123. T. T. T. Tran, T. D. Quan, T. H. A. Nguyen and T. V. Sung, *Nat. Prod. Res.*, 2011, **25**, 1361-1365.
124. C. Levrier, M. Balastrier, K. D. Beattie, A. R. Carroll, F. Martin, V. Choomuenwai and R. A. Davis, *Phytochemistry*, 2013, **86**, 121-126.
125. Q. Mu, W. D. Tang, R. Y. Liu, C. M. Li, L. G. Lou, H. D. Sun and C. Q. Hu, *Planta Med.*, 2003, **69**, 826-830.
126. R. Lekphrom, S. Kanokmedhakul and K. Kanokmedhakul, *J. Ethnopharmacol.*, 2009, **125**, 47-50.
127. H. Montenegro, M. Gutiérrez, L. I. Romero, E. Ortega-Barría, T. L. Capson and L. C. Rios, *Planta Med.*, 2003, **69**, 677-679.
128. E. V. Costa, F. D. Marques, M. L. B. Pinheiro, R. M. Braga, C. Delarmelina, M. C. T. Duarte, A. Ruiz, J. E. de Carvalho and B. Maia, *J. Braz. Chem. Soc.*, 2011, **22**, 1111-U1149.
129. V. Mahiou, F. Roblot, A. Fournet and R. Hocquemiller, *Phytochemistry*, 2000, **54**, 709-716.
130. D. Rabelo, M. L. B. Pinheiro, A. Barison, K. S. Salomé, E. V. Costa, F. M. A. da Silva, Y. O. Chaves and I. D. Bastos, *Quim. Nova*, 2014, **37**, 1453-1458.
131. J. A. Lopez, J. G. Laurito, F. T. Lin, M. Sharaf, L. K. Wong and P. L. Schiff, Jr., *Planta Med.*, 1993, **59**, 191.
132. V. Mahiou, F. Roblot, R. Hocquemiller, A. Cave, A. R. Dearias, A. Inchausti, G. Yaluff, A. Fournet and A. Angelo, *J. Nat. Prod.*, 1994, **57**, 890-895.
133. E. V. Costa, L. N. Soares, M. L. B. Pinheiro, B. Maia, F. A. Marques, A. Barison, J. Almeida, I. L. Sousa, R. S. Galaverna, G. Heerdt, N. H. Morgon, L. D. R. Acho, E. S. Lima, F. M. A. da

- Silva and H. H. F. Koolen, *Phytochemistry*, 2018, **145**, 18-25.
134. E. V. Costa, M. L. B. Pinheiro, B. Maia, F. A. Marques, A. Ruiz, G. M. Marchetti, J. E. de Carvalho, M. B. P. Soares, C. O. S. Costa, A. F. C. Galvao, N. P. Lopes, H. H. F. Koolen, D. P. Bezerra and A. Barison, *J. Nat. Prod.*, 2016, **79**, 1524-1531.
135. E. V. Costa, P. E. O. da Cruz, M. L. B. Pinheiro, F. A. Marques, A. Ruiz, G. M. Marchetti, J. E. de Carvalho, A. Barison and B. Maia, *J. Braz. Chem. Soc.*, 2013, **24**, 788-+.
136. H. Dehaussy, M. Tits and L. Angenot, *Planta Med.*, 1983, **49**, 25-27.
137. A. R. dos Santos, C. Pires, F. A. Marques, A. Q. Lobao and B. Maia, *Biochem. Syst. Ecol.*, 2017, **73**, 1-2.
138. M. D. C. Santos, L. M. Dutra, V. R. D. Moraes, A. Barison and E. V. Costa, *Biochem. Syst. Ecol.*, 2015, **60**, 106-109.
139. M. Rodriguez, E. Bastidas, M. Rodriguez, E. Lucena, A. Castillo and M. Hasegawa, *Nat. Prod. Commun.*, 2008, **3**, 515-518.
140. E. M. K. Wijeratne, B. D. Lankananda, Y. Tezuka, T. Nagaoka and A. A. L. Gunatilaka, *J. Nat. Prod.*, 2001, **64**, 1465-1467.
141. Y. C. Wu, C. Y. Duh, S. K. Wang, K. S. Chen and T. H. Yang, *J. Nat. Prod.*, 1990, **53**, 1327-1331.
142. W. Panidthananon, T. Chaowasku, B. Sritularak and K. Likhitwitayawuid, *Molecules*, 2018, **23**.
143. O. Uadkla, S. Yodkeeree, M. Buayairaksa, P. Meepowpan, N. Nuntasaen, P. Limtrakul and W. Pompimon, *Pharm. Biol.*, 2013, **51**, 400-404.
144. W. Sesang, S. Punyanitya, S. Pitchuanom, P. Udomputtimekakul, N. Nuntasaen, R. Banjerpongchai, B. Wudtiwai and W. Pompimon, *Molecules*, 2014, **19**, 8762-8772.
145. A. I. Waechter, A. Cave, R. Hocquemiller, C. Bories, V. Munoz and A. Fournet, *Phytother. Res.*, 1999, **13**, 175-177.
146. F. M. A. da Silva, A. D. L. de Souza, H. H. F. Koolen, A. Barison, M. E. Vendramin, E. V. Costa, A. G. Ferreira and M. L. B. Pinheiro, *Phytochem. Anal.*, 2014, **25**, 45-49.
147. F. M. A. da Silva, F. A. da Silva, C. A. S. de Souza, J. B. Maciel, E. V. Costa, A. Barison, H. H. F. Koolen, A. D. L. de Souza and M. L. B. Pinheiro, *Biochem. Syst. Ecol.*, 2018, **79**, 12-14.
148. F. M. A. da Silva, F. A. da Silva Filho, B. R. de Lima, R. A. de Almeida, D. M. Mendonca, R. C. Pereira Junior, L. M. Dutra, A. Barison, H. H. F. Koolen, A. D. L. de Souza and M. L. B. Pinheiro, *Helv. Chim. Acta*, 2016, **99**, 494-498.
149. F. M. A. da Silva, F. A. da Silva, C. A. S. de Souza, J. B. Maciel, E. V. Costa, A. Barison, H. H. F. Koolen, A. D. L. de Souza and M. L. B. Pinheiro, *Biochem. Syst. Ecol.*, 2018, **79**, 69-71.
150. Y. Liu, Y. W. Li, F. W. Muema, H. Zhang, A. J. Seukep and M. Q. Guo, *J. Funct. Foods*, 2023, **106**, 105601.
151. L. P. S. Pimenta and D. D. Mendonca, *Nat. Prod. Res.*, 2012, **26**, 1948-1950.
152. S. Granell, I. Andreu, D. Marti, A. Cave, R. Aragon, E. Estornell, D. Cortes and M. C. Zafra-Polo, *Planta Med.*, 2004, **70**, 266-268.
153. L. R. A. Menezes, C. O. D. Costa, A. Rodrigues, F. R. D. Santo, A. Nepel, L. M. Dutra, F. M. A. Silva, M. B. P. Soares, A. Barison, E. V. Costa and D. P. Bezerra, *Molecules*, 2016, **21**, 890.
154. M. G. S. Vieira, N. V. Gramosa and E. R. Silveira, *Biochem. Syst. Ecol.*, 2021, **95**, 104229.
155. D. C. Gontijo, M. F. A. do Nascimento, G. C. Brandao and A. B. de Oliveira, *Nat. Prod. Res.*, 2020, **34**, 3526-3530.
156. Y. G. Guo, Y. H. Ding, G. J. Wu, S. L. Zhu, Y. F. Sun, S. K. Yan, F. Qian, H. Z. Jin and W. D. Zhang, *Fitoterapia*, 2018, **127**, 96-100.
157. H. Takatsu, T. Yamadaya, K. Furihata, M. Ogata, T. Endo, K. Kojima and S. Urano, *J. Nat. Prod.*, 2005, **68**, 430-431.
158. Z. X. Hu, H. Y. Tang, X. H. Yan, Y. R. Zeng, H. A. Aisa, Y. Zhang and X. J. Hao, *Phytochem. Lett.*, 2019, **29**, 6-11.
159. N. Ablajan, B. Zhao, X. Wenjuan, J. Zhao, S. S. Sagdullaev, Z. Guoan and H. A. Aisa, *Nat. Prod. Res.*, 2023, **37**, 1382-1385.
160. X. D. Qin, S. Yang, Y. Zhao, Y. Gao, F. C. Ren, D. Y. Zhang and F. Wang, *Chem. Nat. Compd.*, 2017, **53**, 501-503.
161. Y. L. Zhou, D. N. Zhang, J. X. Qiao, J. Wu, Y. M. Yan, Z. X. Cao, C. Peng and Y. Z. Tan, *Phytochemistry*, 2023, **207**, 113558.
162. J. S. Shin, H. S. Yun-Choi, E. I. Kim and M. K. Lee, *Planta Med.*, 1999, **65**, 452-455.
163. T. M. Gabbasov, E. M. Tsyrlina, M. S. Yunusov, V. V. Teslenko, A. V. Salokhin, Y. E. Sabutskii and P. G. Gorovoi, *Chem. Nat. Compd.*, 2014, **50**, 1156-1157.
164. H. Takayama, Y. Hitotsuyanagi, K. Yamaguchi, N. Aimi and S. Sakai, *Chem. Pharm. Bull.*,

- 1992, **40**, 2927-2931.
165. C. L. Winek, J. L. Beal and M. P. Cava, *J. Pharm. Sci.*, 1964, **53**, 734-737.
  166. G. H. Constantine, Jr., M. R. Vitek, K. Sheth, P. Catalfomo and L. A. Sciuchetti, *J. Pharm. Sci.*, 1966, **55**, 982-984.
  167. D. Nikolic, D. C. Lankin, T. Cisowska, S.-N. Chen, G. F. Pauli and R. B. van Breemen, *Recent Adv. Phytochem.*, 2015, **45**, 31-75.
  168. L. Dai, B. Li, X. Yang, Y. Wang, H. Pan, J. Zhang and X. Shang, *Front. Nutr.*, 2022, **9**, 850714.
  169. J. H. Chen, Z. Z. Du, Y. M. Shen and Y. P. Yang, *Arch. Pharm. Res.*, 2009, **32**, 3-5.
  170. H. K. Desai, B. S. Joshi, S. W. Pelletier, B. Sener, F. Bingol and T. Baykal, *Heterocycles*, 1993, **36**, 1081-1089.
  171. Y. Lin, H. C. Guo, Y. Kuang, Z. P. Shang, B. Li, K. Chen, L. L. Xu, X. Qiao, H. Liang and M. Ye, *Fitoterapia*, 2020, **141**, 104464.
  172. I. K. Park, H. S. Lee, S. G. Lee, J. D. Park and Y. J. Ahn, *J. Econ. Entomol.*, 2000, **93**, 331-335.
  173. H. Lee, L. T. Tuong, J. H. Jeong, S. J. Lee, G. U. Bae and J. H. Ryu, *Bioorg. Med. Chem. Lett.*, 2017, **27**, 1401-1404.
  174. A. Misra, M. K. Chaudhary, P. Rawat, D. Tripathi, S. K. Barik and S. Srivastava, *Fitoterapia*, 2024, **177**, 106050.
  175. W. Herath, D. Ferreira and I. A. Khan, *Nat. Prod. Res.*, 2003, **17**, 269-274.
  176. S. Sathianarayanan, A. V. Ammanath, R. Biswas, A. B. S. Sukumaran and B. Venkidasamy, *Microb. Pathog.*, 2022, **168**, 105594.
  177. G. Blaskó, D. J. Gula and M. Shamma, *J. Nat. Prod.*, 1982, **45**, 105-122.
  178. Y. M. Liu, J. S. Yang and Q. H. Liu, *Chem. Pharm. Bull.*, 2004, **52**, 454-455.
  179. Z. Y. Wang, F. H. Chu, N. N. Gu, Y. Wang, D. Feng, X. Zhao, X. D. Meng, W. T. Zhang, C. F. Li, Y. Chen, S. S. Wei, Z. Q. Ma, R. C. Lin, C. J. Zhao and D. X. Zou, *J. Ethnopharmacol.*, 2021, **271**, 113818.
  180. Z. R. Yan, Z. Y. Wang, B. Wang, P. F. Zhu, X. Wei, H. F. Yu, Y. F. Wang, Y. P. Liu, W. L. Xiao and X. D. Luo, *Fitoterapia*, 2018, **128**, 247-252.
  181. H. Zhang, X. M. Wang, Y. Q. Guo, X. M. Liu, X. Z. Zhao, T. Teka, C. X. Lv, L. F. Han, Y. H. Huang and G. X. Pan, *J. Ethnopharmacol.*, 2021, **268**, 113566.
  182. S. M. Kupchan, K. K. Chakravarti and N. Yokoyama, *J. Pharm. Sci.*, 1963, **52**, 985-988.
  183. L. Z. Lin, S. F. Hu, M. Chu, T. M. Chan, H. Chai, C. K. Angerhofer, J. M. Pezzuto and G. A. Cordell, *Phytochemistry*, 1999, **50**, 829-834.
  184. M. Velcheva, H. Dutschewska and G. Samuelsson, *Acta Pharm. Nord.*, 1992, **4**, 57-58.
  185. D. H. Li, J. Guo, W. Bin, N. Zhao, K. B. Wang, J. Y. Li, Z. L. Li and H. M. Hua, *Arch. Pharm. Res.*, 2016, **39**, 871-877.
  186. A. Kumar, S. R. Chowdhury, T. Sarkar, T. Chakrabarti, H. K. Majumder, T. Jha and S. Mukhopadhyay, *Fitoterapia*, 2016, **109**, 25-30.
  187. R. Istatkova, A. Tashev, P. Popova and S. Philipov, *C. R. Acad. Bulg. Sci.*, 2011, **64**, 1109-1116.
  188. M. P. Velcheva, H. B. Dutschewska, S. Danghaaaghiin, Z. Samdanghiin and Z. Yansanghiin, *Planta Med.*, 1993, **59**, 262-263.
  189. J. Serkedjieva and M. Velcheva, *Antivir. Chem. Chemother.*, 2003, **14**, 75-80.
  190. Q. Jin, D. Yang, Z. Dai, A. Khan, B. Wang, X. Wei, Y. Sun, Y. L. Zhao, Y. F. Wang, Y. P. Liu, X. D. Zhao and X. D. Luo, *Fitoterapia*, 2018, **128**, 204-212.
  191. T. A. Al-Howiriny, M. A. Zemaitis, C. Y. Gao, C. E. Hadden, G. E. Martin, F. T. Lin and P. L. Schiff, *J. Nat. Prod.*, 2001, **64**, 819-822.
  192. D. Dwuma-Badu, T. U. Okarter, A. N. Tackie, J. A. Lopez, D. J. Slatkin, J. E. Knapp and P. L. Schiff, Jr., *J. Pharm. Sci.*, 1977, **66**, 1242-1244.
  193. A. Patra, S. Ghosh and B. Mukherjee, *Magn. Reson. Chem.*, 2010, **48**, 823-828.
  194. M. Rahimizadeh, *Planta Med.*, 1986, 339.
  195. N. S. Roy, N. I. Park, N. S. Kim, Y. Park, B. Y. Kim, Y. D. Kim, J. K. Yu, Y. I. Kim, T. Um, S. Kim and I. Y. Choi, *Plants (Basel)*, 2022, **11**, 2676.
  196. I. A. Basera, A. Girme, V. P. Bhatt and M. B. Shah, *JPC-J. Planar Chromat.*, 2021, **34**, 147-155.
  197. S. Ali, M. Alamzeb, M. U. Rashid and W. N. Setzer, *J. Nat. Prod.*, 2020, **83**, 1383-1393.
  198. M. A. Morales, E. Gonzalez, R. Torres and J. L. Martinez, *Arch. Med. Res.*, 1993, **24**, 177-181.
  199. V. Fajardo, M. Araya, P. Cuadra, A. Oyarzun, A. Gallardo, M. Cueto, A. R. Diaz-Marrero, J. Darias, L. Villarroel, C. Alvarez, Y. Mora-Pérez and P. Joseph-Nathan, *J. Nat. Prod.*, 2009, **72**, 1355-1356.
  200. M. Alamzeb, W. N. Setzer, S. Ali, B. Khan, R. Mamoon Ur, Ihsanullah, S. M. Salman, Adnan, M. Omer, J. Ali and A. Ullah, *Front. Chem.*, 2021, **9**, 711190.

201. G. Azimi, A. Hakakian, M. Ghanadian, A. Joumaa and S. Alamian, *Res. Pharm. Sci.*, 2018, **13**, 149-158.
202. H. Du, T. Xu, H. Yi, X. M. Xu, C. C. Zhao, Y. M. Ge, C. T. Zhang and G. Fan, *Planta Med.*, 2022, **88**, 933-949.
203. S. Ali, G. Badshah, C. Da Ros Montes D'Oca, F. Ramos Campos, N. Nagata, A. Khan, M. de Fátima Costa Santos and A. Barison, *Molecules*, 2020, **25**, 3647.
204. S. Y. Yin, J. J. Lee, Y. M. Kim, C. M. Jin, Y. J. Yang and M. K. Lee, *Nat. Prod. Sci.*, 2004, **10**, 124-128.
205. L. Manosalva, A. Mutis, J. Diaz, A. Urzua, V. Fajardo and A. Quiroz, *Bol. Latinoam. Caribe Plant. Med. Aromat.*, 2014, **13**, 324-335.
206. B. B. Yu, L. L. Liu, J. D. Yan, J. B. Cao and Y. Cao, *Anti-Cancer Drugs*, 2022, **33**, E178-E185.
207. A. Singh, V. Bajpai, M. Srivastava, K. R. Arya and B. Kumar, *Rapid Commun. Mass Spectrom.*, 2014, **28**, 2089-2100.
208. R. Istatkova, S. Philipov, P. Tuleva, S. Amgalan, J. Samdan and S. Dangaa, *C. R. Acad. Bulg. Sci.*, 2007, **60**, 1177-1182.
209. R. Quevedo, L. Nunez and B. Moreno, *Nat. Prod. Res.*, 2011, **25**, 934-938.
210. C. A. Liu, C. W. W. Beecher and S. X. Zhao, *J. Nat. Prod. (Lloydia)*, 1995, **58**, 1100-1102.
211. R. Suau, R. Rico, J. M. Lopez-Romero, F. Najera and A. Cuevas, *Phytochemistry*, 1998, **49**, 2545-2549.
212. N. I. Park, N. S. Roy, Y. Park, B. S. Choi, M. J. Jeon, J. Y. Oh, B. Y. Kim, Y. D. Kim, Y. I. Kim, T. Um, H. J. Kwak, N. S. Kim, S. Kim and I. Y. Choi, *Plants (Basel)*, 2023, **12**, 1483.
213. T. Z. Woldemariam, J. M. Betz and P. J. Houghton, *J. Pharm. Biomed. Anal.*, 1997, **15**, 839-843.
214. Z. R. Doslov-Kokorus, I. D. Ivanovic, M. R. Simic, V. E. Vajs and N. N. Kovacevic, *J. Serb. Chem. Soc.*, 2006, **71**, 251-255.
215. X. Zhang, M. Oh, S. Kim, J. Kim, H. Kim, S. Kim, P. J. Houghton and W. Whang, *Nat. Prod. Res.*, 2013, **27**, 1067-1074.
216. C. C. Lin, L. T. Ng, F. F. Hsu, D. E. Shieh and L. C. Chiang, *Clin. Exp. Pharmacol. Physiol.*, 2004, **31**, 65-69.
217. B. R. Jeong and I. Sivanesan, *Plant Cell Tissue Organ Cult.*, 2016, **124**, 453-458.
218. V. Misik, L. Bezakova, L. Malekova and D. Kostalova, *Planta Med.*, 1995, **61**, 372-373.
219. L. Bezakova, V. Misik, L. Malekova, E. Svajdenka and D. Kostalova, *Die Pharmazie*, 1996, **51**, 758-761.
220. Y. Huang, T. J. Wang, J. Wang, G. Yin and J. S. Tu, *J. Liq. Chromatogr. Relat. Technol.*, 2020, **43**, 538-546.
221. V. R. Kozhuharov, K. Ivanov and S. Ivanova, *Plants (Basel)*, 2022, **11**, 354.
222. J. Qin, S. Y. Zhang, Y. B. Zhang, L. F. Chen, N. H. Chen, Z. N. Wu, D. Luo, G. C. Wang and Y. L. Li, *Nat. Prod. Res.*, 2021, **35**, 3254-3260.
223. C. Y. Peng, J. Q. Liu, R. Zhang and J. C. Shu, *Nat. Prod. Res.*, 2014, **28**, 1159-1164.
224. B. Kanyinda, B. Diallo, R. Vanhaelen-Fastre and M. Vanhaelen, *Planta Med.*, 1989, **55**, 394.
225. Y. X. Liu, L. Harinantenaina, P. J. Brodie, C. Slebodnick, M. W. Callmander, R. Rakotondrajaona, E. Rakotobe, V. E. Rasamison, K. TenDyke, Y. C. Shen and D. G. I. Kingston, *Magn. Reson. Chem.*, 2013, **51**, 574-579.
226. B. Kanyinda, R. VanhaelenFastre and M. Vanhaelen, *J. Nat. Prod.*, 1995, **58**, 1587-1589.
227. G. E. Hawkes, H. de Wet and J. Li, *Molecules*, 2011, **16**, 9153-9160.
228. M. L. Lohombo-Ekomba, P. N. Okusa, O. Penge, C. Kabongo, M. I. Choudhary and O. E. Kasende, *J. Ethnopharmacol.*, 2004, **93**, 331-335.
229. S. Ayers, D. L. Zink, K. Mohn, J. S. Powell, C. M. Brown, T. Murphy, R. Brand, S. Pretorius, D. Stevenson, D. Thompson and S. B. Singh, *Planta Med.*, 2007, **73**, 296-297.
230. D. K. Semwal, R. B. Semwal, I. Vermaak and A. Viljoen, *J. Ethnopharmacol.*, 2014, **155**, 1011-1028.
231. J. Ribeiro, F. C. Leite, A. S. Calheiros, A. D. Carneiro, J. A. Azeredo, E. F. de Assis, C. D. Dias, M. R. Piuvezam and P. T. Bozza, *Toxins*, 2019, **11**, 705.
232. S. M. Kupchan, A. C. Patel and E. Fujita, *J. Pharm. Sci.*, 1965, **54**, 580-583.
233. L. R. Bernardo, L. K. D. P. Ferreira, L. A. M. P. Ferreira, C. I. D. Vieira, J. B. De Oliveira, L. M. De Lima, A. F. Alves, R. S. Araujo, M. S. Maia, M. T. Scotti, J. M. Barbosa and M. R. Piuvezam, *An. Acad. Bras. Cienc.*, 2022, **94**, e20211327.
234. F. R. Chang and Y. C. Wu, *J. Nat. Prod.*, 2005, **68**, 1056-1060.
235. H. Guinaudeau, L. Z. Lin, N. Ruangrungsi and G. A. Cordell, *J. Nat. Prod.*, 1993, **56**, 1989-1992.

236. H. J. Martin, P. Pachaly and F. Zymalkowski, *Arch. Pharm. (Weinheim)*, 1977, **26**, 314-319.
237. A. Valsan, M. T. Meenu, V. P. Murali, B. Malgija, A. G. Joseph, P. Nisha, K. K. Maiti and K. V. Radhakrishnan, *Acs Omega*, 2023, **8**, 14799-14813.
238. M. Tomita, Y. Okamoto, Y. Nagai, S. Tanaka and T. Hayata, *Yakugaku Zasshi*, 1970, **90**, 1182-1186.
239. R. H. Manske, M. Tomita, K. Fujitani and Y. Okamoto, *Chem. Pharm. Bull.*, 1965, **13**, 1476-1477.
240. Y. F. Yang, Y. Sun, Z. X. Wang, M. J. Yin, R. Z. Sun, L. Xue, X. S. Huang, C. H. Wang and X. H. Yan, *Front. Plant Sci.*, 2022, **13**, 1086335.
241. R. Bi, X.-N. Yang, H.-F. Zhou, L.-Y. Peng, J.-X. Liu and Q.-S. Zhao, *Phytochemistry*, 2022, **200**, 113244.
242. J. Y. Lee, K. J. Kim, J. Kim, S. U. Choi, S. H. Kim and S. Y. Ryu, *Arch. Pharm. Res.*, 2016, **39**, 713-720.
243. R. A. Omole, J. Gathirwa, H. Akala, H. M. Malebo, A. K. Machocho, A. Hassanali and I. O. Ndiege, *Phytochemistry*, 2014, **103**, 123-128.
244. J. T. Blanchfield, D. P. A. Sands, C. H. L. Kennard, K. A. Byriel and W. Kitching, *Phytochemistry*, 2003, **63**, 711-720.
245. D. K. Semwal, R. Badoni, R. Semwal, S. K. Kothiyal, G. J. P. Singh and U. Rawat, *J. Ethnopharmacol.*, 2010, **132**, 369-383.
246. C. Dary, S. S. Bun, G. Herbette, F. Mabrouki, H. Bun, S. Kim, F. Jabbour, S. Hul, B. Baghdikian and E. Ollivier, *Nat. Prod. Res.*, 2017, **31**, 802-809.
247. K. Nakaoji, H. Nayeshiro, T. Tanahashi, Y. Su and N. Nagakura, *Planta Med.*, 1997, **63**, 425-428.
248. N. Kashiwaba, S. Morooka, M. Kimura, M. Ono, J. Toda, H. Suzuki and T. Sano, *J. Nat. Prod.*, 1996, **59**, 476-480.
249. N. Kashiwaba, M. Ono, J. Toda, H. Suzuki and T. Sano, *J. Nat. Prod.*, 2000, **63**, 477-479.
250. T. Y. Gorpenchenko, V. P. Grigorichuk, S. A. Fedoreyev, D. V. Tarbeeva, G. K. Tchernoded and V. P. Bulgakov, *Plant Cell Tissue Organ Cult.*, 2017, **128**, 67-76.
251. M. R. Camacho, G. C. Kirby, D. C. Warhurst, S. L. Croft and J. D. Phillipson, *Planta Med.*, 2000, **66**, 478-480.
252. K. Likhitwitayawuid, C. K. Angerhofer, G. A. Cordell, J. M. Pezzuto and N. Ruangrunsi, *J. Nat. Prod.*, 1993, **56**, 30-38.
253. Y.-B. Zhou, Y.-F. Wang, Y. Zhang, L.-Y. Zheng, X.-A. Yang, N. Wang, J.-H. Jiang, F. Ma, D.-T. Yin, C.-Y. Sun and Q.-D. Wang, *Eur. J. Pharmacol.*, 2012, **683**, 10-15.
254. D. K. Semwal, U. Rawat, R. Semwal, R. Singh and G. J. P. Singh, *J. Asian Nat. Prod. Res.*, 2010, **12**, 99-105.
255. L. B. Zhang and G. X. Rao, *Biochem. Syst. Ecol.*, 2009, **37**, 622-625.
256. W. Chaichompoo, P. Rojsitthisak, W. Pabuprapap, Y. Siri wattanasathien, P. Yotmanee, W. Haritakun and A. Suksamrarn, *RSC Adv.*, 2021, **11**, 21153-21169.
257. T. M. Hung, N. H. Dang, J. C. Kim, H. S. Jang, S. W. Ryou, J. H. Lee, J. S. Choi, K. Bae and B. S. Min, *Planta Med.*, 2010, **76**, 1762-1764.
258. A. Chea, S. S. Bun, N. Azas, M. Gasquet, S. Bory, E. Ollivier and R. Elias, *Nat. Prod. Res.*, 2010, **24**, 1766-1770.
259. S. T. Wang, L. L. Tian, Y. Q. Wang, J. Y. He, K. Yun, S. G. Yan, W. Q. Qian, Y. Ping and J. M. Huang, *Phytochem. Anal.*, 2022, **33**, 239-248.
260. X. Y. An, J. Yang, M. Wang, H. Y. Zhang, C. Li, K. D. Yao and F. L. Yao, *Int. J. Pharm.*, 2008, **350**, 257-264.
261. R. Z. Wang, J. Zhou, G. R. Shi, Y. F. Liu and D. Q. Yu, *Fitoterapia*, 2020, **143**, 104551.
262. Y. Qian, H. Xie, T. Zuo, X. Li, Y. Hu, H. Wang, X. Gao and W. Yang, *World J. Tradit. Chin. Med.*, 2021, **7**, 120-129.
263. R. Z. Wang, Y. F. Liu, G. R. Shi, J. Zhou, J. Y. Li, L. Li, J. Q. Yuan, X. Y. Li and D. Q. Yu, *Bioorg. Chem.*, 2020, **98**, 103697.
264. J. Banerji, A. Chatterjee, A. Patra, P. Bose, R. Das, B. Das, M. Shamma and B. Tantisewie, *Phytochemistry*, 1994, **36**, 1053-1056.
265. S. Kongkiatpaiboon, N. Duangdee, S. Prateeptongkum and W. Chaijaroenkul, *Nat. Prod. Commun.*, 2016, **11**, 1805-1806.
266. P. M. Le, V. Srivastava, T. T. Nguyen, B. Pradines, M. Madamet, J. Mosnier, T. T. Trinh and H. Lee, *Phytother. Res.*, 2017, **31**, 1357-1368.
267. A. Makarasen, W. Sirithana, S. Mogkhuntod, N. Khunnawutmanotham, N. Chimnoi and S. Techasakul, *Planta Med.*, 2011, **77**, 1519-1524.



268. M. S. Zhang, G. Y. Liang, J. P. Yu and W. D. Pan, *Nat. Prod. Res.*, 2010, **24**, 1243-1247.
269. M. S. Zhang, F. M. Yang, D. P. Wang, J. X. Zhang, Q. Y. Sun, G. Y. Liang and W. D. Pan, *Phytochem. Lett.*, 2012, **5**, 96-99.
270. D. Liao, W. Zhang, P. Gupta, Z. N. Lei, J. Q. Wang, C. Y. Cai, A. A. De Vera, L. Zhang, Z. S. Chen and D. H. Yang, *Molecules*, 2019, **24**, 4383.
271. V. Bajpai, A. Singh, P. Chandra, M. P. S. Negi, N. Kumar and B. Kumar, *Phytochem. Anal.*, 2016, **27**, 92-99.
272. Y. C. Chang, P. W. Hsieh, F. R. Chang, R. R. Wu, C. C. Liaw, K. H. Lee and Y. C. Wu, *Planta Med.*, 2003, **69**, 148-152.
273. Y. C. Chang, F. R. Chang, A. T. Khalil, P. W. Hsieh and Y. C. Wu, *Z. Naturforsch. C. J. Biosci.*, 2003, **58**, 521-526.
274. J. Rubio-Piña and F. Vázquez-Flota, *Curr. Top. Med. Chem.*, 2013, **13**, 2200-2207.
275. T. Siatka, M. Adamcova, L. Opletal, L. Cahlikova, D. Jun, M. Hrabinoval, J. Kunes and J. Chlebek, *Molecules*, 2017, **22**, 1181.
276. E. Sanchez-Arreola, L. R. Hernandez-Molina, J. L. Sanchez-Salas and G. Martinez-Espino, *Pharm. Biol.*, 2006, **44**, 540-543.
277. H. G. Kiryakov, E. Iskrenova, B. Kuzmanov and L. Evstatieva, *Planta Med.*, 1981, **43**, 51-55.
278. P. Wangchuk, P. A. Keller, S. G. Pyne, T. Sastraruji, M. Taweechotipatr, R. Rattanajak, A. Tonsomboon and S. Kamchonwongpaisan, *Nat. Prod. Commun.*, 2012, **7**, 575-580.
279. C. L. Zhang, Q. L. Huang, Q. Zhu, J. Chen, F. Zhang and Z. Y. Cao, *Fitoterapia*, 2020, **144**, 104494.
280. S. Koul, T. K. Razdan, C. S. Andotra, A. K. Kalla, S. Koul and S. C. Taneja, *Planta Med.*, 2002, **68**, 262-265.
281. L. Yuan, J. Yin, M. Tian, J. B. Xie, Y. Wang, Z. G. Hou, Y. B. Li and Y. J. Zhang, *Anal. Methods*, 2016, **8**, 2274-2281.
282. T. T. Hu, X. Zhang, S. Z. Ma and X. S. Yao, *Chin. Chem. Lett.*, 2009, **20**, 955-957.
283. B.-B. Xiao, G.-Y. Xia, L.-Y. Wang, B.-L. Qiu, H. Xia, W.-C. Zhong, G.-H. Tian and S. Lin, *Tetrahedron Lett.*, 2020, **61**, 151890.
284. Y. Fu, Y. Zhou, X. Liao, B. R. Bai, S. L. Peng and L. S. Ding, *Planta Med.*, 2009, **75**, 547-549.
285. J. Y. Zhou, X. J. Tong, W. Y. Lian and Q. C. Fang, *Planta Med.*, 1991, **57**, 156-158.
286. X. F. Niu, H. B. Xu, X. Liu, T. Fan and L. Qi, *Chem. Nat. Compd.*, 2013, **49**, 187-189.
287. M. Goel, U. P. Singh, R. N. Jha, V. B. Pandey and M. B. Pandey, *Folia Microbiol.*, 2003, **48**, 363-368.
288. J. Zhang, C. Zhang, F. C. Xu, Quesheng, Q. Y. Zhang, P. F. Tu and H. Liang, *Phytochemistry*, 2019, **159**, 199-207.
289. J. Zhang, Q. Y. Zhang, P. F. Tu, F. C. Xu and H. Liang, *J. Nat. Prod.*, 2018, **81**, 364-370.
290. M. Naseri, S. A. Emami, J. Asili, Z. Tayarani-Najaran, G. Dehghan, B. Schneider and M. Iranshahi, *Bioorg. Chem.*, 2018, **77**, 651-659.
291. K. C. Du, Y. X. Liu, K. Q. Zong, Y. M. Wang, J. H. Li and D. L. Meng, *Phytochemistry*, 2022, **200**, 113240.
292. K. H. Kim, C. J. Piao, S. U. Choi, M. W. Son and K. R. Lee, *Planta Med.*, 2010, **76**, 1732-1738.
293. A. Borghini, D. Pietra, C. di Trapani, P. Madau, G. Lubinu and A. M. Bianucci, *Ind. Crops Prod.*, 2015, **64**, 25-32.
294. G. Rucker, E. Breitmaier, G. L. Zhang and R. Mayer, *Phytochemistry*, 1994, **36**, 519-523.
295. Q. B. He, X. B. Li, X. L. Wang, H. X. Lou and P. H. Fan, *Phytochem. Lett.*, 2022, **49**, 12-20.
296. H. Jiang, T. Hou, Y. Han, S. B. Lu, L. Liu, D. X. Li, Y. H. Zhu, H. Huang, W. J. Li, X. Y. Xue, Y. F. Liu and X. M. Liang, *Fitoterapia*, 2023, **165**, 105397.
297. A. Petruczynik, T. Plech, T. Tuzimski, J. Misiurek, B. Kaproń, D. Misiurek, M. Szultka-Młyńska, B. Buszewski and M. Waksmondzka-Hajnos, *Toxins (Basel)*, 2019, **11**, 575.
298. A. Och, K. Szewczyk, Ł. Pecio, A. Stochmal, D. Załuski and A. Bogucka-Kocka, *Oxid. Med. Cell. Longev.*, 2017, **2017**, 9369872.
299. W. G. Ma, Y. Fukushi, S. Tahara and T. Osawa, *Fitoterapia*, 2000, **71**, 527-534.
300. J. Suchomelová, H. Bochoráková, H. Paulová, P. Musil and E. Táborská, *J. Pharm. Biomed. Anal.*, 2007, **44**, 283-287.
301. Y. L. Chen, M. Li, J. J. Liu, Q. Yan, M. Zhong, J. X. Liu, D. L. Di and J. X. Liu, *J. Sep. Sci.*, 2015, **38**, 9-17.
302. Y. Tian, Z. Q. Wang, X. Xu, Y. Q. Guo, Y. N. Ma, Y. Q. Lu, M. W. Shen, Y. Geng, H. Tomás, J. Rodrigues and R. L. Sheng, *Nat. Prod. Res.*, 2024, DOI: 10.1080/14786419.2024.2335669, 1-18.

303. Y. L. Chen, R. X. Li, R. R. Gao, Q. Yan, M. Zhong, J. X. Liu, Q. Y. Zhao and D. L. Di, *Anal. Methods*, 2016, **8**, 2645-2652.
304. C. Seger, S. Sturm, E. M. Strasser, E. Ellmerer and H. Stuppner, *Magn. Reson. Chem.*, 2004, **42**, 882-886.
305. V. B. Pandey, A. B. Ray and B. Dasgupta, *Phytochemistry*, 1976, **15**, 545-546.
306. A. Rathi, A. K. Srivastava, A. Shirwalkar, A. K. S. Rawat and S. Mehrotra, *Phytomedicine*, 2008, **15**, 470-477.
307. E. Taborska, H. Bochorakova, J. Sousek, P. Sedmera, V. Havlicek and V. Simanek, *Heterocycles*, 1997, **45**, 817-821.
308. I. Naz, S. Abdulkafi, I. Munir, M. Ahmad, A. Ali, A. Sultan, J. E. Palomares-Rius, S. Ali and I. Ahmad, *Crop Prot.*, 2016, **81**, 138-144.
309. B. Gözler, T. Gözler and M. Shamma, *Tetrahedron*, 1983, **39**, 577-580.
310. L. Cahlikova, K. Macakova, J. Kunes, M. Kurfurst, L. Opletal, J. Cvacka, J. Chlebek and G. Blunden, *Nat. Prod. Commun.*, 2010, **5**, 1035-1038.
311. A. Becker, Y. Yamada and F. Sato, *Front. Plant Sci.*, 2023, **14**, 1084358.
312. N. Ikezawa, K. Iwasa and F. Sato, *Plant Cell Rep.*, 2009, **28**, 123-133.
313. T. Akaberi, K. Shourgashti, S. A. Emami and M. Akaberi, *Phytochemistry*, 2021, **191**, 112923.
314. T. K. Saygi, N. R. Tan, G. O. A. Toraman, C. U. Gurer, O. Tugay and G. Topcu, *Pharm. Biol.*, 2023, **61**, 907-917.
315. T. Doncheva, I. Doycheva and S. Philipov, *Biochem. Syst. Ecol.*, 2016, **68**, 1-5.
316. A. Shafiee, K. Morteza-Semnani and M. Amini, *J. Nat. Prod.*, 1998, **61**, 1564-1565.
317. A. Shafiee, I. Lalezari and O. Rahimi, *Lloydia*, 1977, **40**, 352-355.
318. E. Taborska, H. Bochorakova, P. Sedmera, I. Valka and V. Simanek, *Heterocycles*, 1995, **41**, 799-805.
319. X. Y. Shang, H. S. Jiao, Y. C. Yang and J. G. Shi, *Chin. Chem. Lett.*, 2003, **14**, 597-598.
320. H. F. Wu, L. S. Ding, J. W. Shen, H. J. Zhu and X. F. Zhang, *Fitoterapia*, 2009, **80**, 252-254.
321. G. Sariyar and M. Shamma, *J. Nat. Prod.*, 1988, **51**, 802-803.
322. A. Sari, A. I. Gray and G. Sariyar, *Nat. Prod. Res.*, 2004, **18**, 265-268.
323. J. H. Oh, I. J. Ha, M. Y. Lee, E. O. Kim, D. Park, J. H. Lee, S. G. Lee, D. W. Kim, T. H. Lee, E. J. Lee and C. K. Kim, *J. Sep. Sci.*, 2018, **41**, 2517-2527.
324. I. Coban, G. G. Toplan, B. Ozbek, C. U. Gurer and G. Sariyar, *Pharm. Biol.*, 2017, **55**, 1894-1898.
325. F. Labanca, J. Ovesna and L. Milella, *Phytochem. Rev.*, 2018, **17**, 853-871.
326. J. S. Morris and P. J. Facchini, *J. Biol. Chem.*, 2016, **291**, 23416-23427.
327. Z. X. Qing, P. Cheng, X. B. Liu, Y. S. Liu and J. G. Zeng, *J. Pharm. Biomed. Anal.*, 2015, **103**, 26-34.
328. P. Huang, M. Xu, L. G. Xia, Z. X. Qing, Q. Tang, W. Liu and J. G. Zeng, *Sci. Hortic.*, 2017, **226**, 302-306.
329. W. J. Hu, F. Yang, W. X. Liu, L. Y. Guo, L. W. Ai, X. M. Zhang, Z. L. Sheng and C. B. Gao, *Front. Vet. Sci.*, 2021, **8**, 752767.
330. K. Sebrlova, O. Pes, I. Slaninova, O. Vymazal, J. Kantorova and E. Taborska, *Chem. Pap.*, 2015, **69**, 698-708.
331. C. Xu, Y. Zhang and R. X. Tan, *Fitoterapia*, 2004, **75**, 239-241.
332. I. M. Menéndez-Perdomo and P. J. Facchini, *Molecules*, 2018, **23**, 2899.
333. Y. Deng, T. J. Tang, X. Li and F. E. Wu, *Nat. Prod. Res.*, 2007, **21**, 28-32.
334. X. Y. Xian, B. H. Sun, X. T. Ye, G. Y. Zhang, P. Y. Hou and H. Y. Gao, *J. Sep. Sci.*, 2014, **37**, 1533-1545.
335. R. N. Alolga, Y. Fan, G. Zhang, J. Li, Y. J. Zhao, J. L. Kakila, Y. Chen, P. Li and L. W. Qi, *Sci. Rep.*, 2015, **5**, 12961.
336. J. J. Chen, H. Y. Fang, C. Y. Duh and I. S. Chen, *Planta Med.*, 2005, **71**, 470-475.
337. Y. Deng, T. T. Ding, L. L. Deng, X. J. Hao and S. Z. Mu, *BMC Chem.*, 2021, **15**, 44.
338. C. F. Wang, C. X. You, K. Yang, S. S. Guo, Z. F. Geng, L. Fan, S. S. Du, Z. W. Deng and Y. Y. Wang, *Ind. Crops Prod.*, 2015, **74**, 407-411.
339. C. D. Goodman, I. Austarheim, V. Mollard, B. Mikolo, K. E. Malterud, G. I. McFadden and H. Wangensteen, *Malar. J.*, 2016, **15**, 481.
340. H. L. Zhang, X. Q. Gan, Q. F. Fan, J. J. Yang, P. Zhang, H. B. Hu and Q. S. Song, *Sci. Rep.*, 2017, **7**.
341. S. J. Wu and I. S. Chen, *Phytochemistry*, 1993, **34**, 1659-1661.
342. R. S. Costa, M. O. Lins, M. Le Hyaric, T. F. Barros and E. S. Velozo, *Rev. Bras. Farmacogn.*, 2017, **27**, 195-198.

343. P. S. Liu, X. J. Lan, X. J. Tao, J. Y. Tian, X. X. Ying and D. Stien, *Nat. Prod. Res.*, 2024, **38**, 68-77.
344. Y. S. Cai, C. Wang, C. K. Tian, W. T. Sun, L. Chen, D. Xiao, S. Y. Zhou, G. F. Qiu, J. Q. Yu, K. K. Zhu and S. P. Yang, *J. Nat. Prod.*, 2019, **82**, 2645-2652.
345. H. Minami, J. S. Kim, N. Ikezawa, T. Takemura, T. Katayama, H. Kumagai and F. Sato, *Proc. Natl. Acad. Sci. U. S. A.*, 2008, **105**, 7393-7398.
346. J. S. Kim, A. Nakagawa, Y. Yamazaki, E. Matsumura, T. Koyanagi, H. Minami, T. Katayama, F. Sato and H. Kumagai, *Biosci. Biotechnol. Biochem.*, 2013, **77**, 2166-2168.
347. A. Nakagawa, H. Minami, J. S. Kim, T. Koyanagi, T. Katayama, F. Sato and H. Kumagai, *Nat. Commun.*, 2011, **2**, 326.
348. E. Matsumura, A. Nakagawa, Y. Tomabechei, S. Ikushiro, T. Sakaki, T. Katayama, K. Yamamoto, H. Kumagai, F. Sato and H. Minami, *Sci. Rep.*, 2018, **8**, 7980.
349. D. Y. Guo, S. J. Kong, Y. Sun, X. Li and H. Pan, *Biotechnol. Bioeng.*, 2021, **118**, 4635-4642.
350. K. M. Hawkins and C. D. Smolke, *Nat. Chem. Biol.*, 2008, **4**, 564-573.
351. W. C. DeLoache, Z. N. Russ, L. Narcross, A. M. Gonzales, V. J. J. Martin and J. E. Dueber, *Nat. Chem. Biol.*, 2015, **11**, 465-+.
352. I. J. Trenchard, M. S. Siddiqui, K. Thodey and C. D. Smolke, *Metab. Eng.*, 2015, **31**, 74-83.
353. M. E. Pyne, K. Kevvai, P. S. Grewal, L. Narcross, B. Choi, L. Bourgeois, J. E. Dueber and V. J. J. Martin, *Nat. Commun.*, 2020, **11**, 3337.
354. O. K. Jamil, A. Cravens, J. T. Payne, C. Y. Kim and C. D. Smolke, *Proc. Natl. Acad. Sci. U. S. A.*, 2022, **119**, e2205848119.
355. K. Thodey, S. Galanie and C. D. Smolke, *Nat. Chem. Biol.*, 2014, **10**, 837-+.
356. S. Galanie, K. Thodey, I. J. Trenchard, M. Filsinger Interrante and C. D. Smolke, *Science*, 2015, **349**, 1095-1100.
357. A. Nakagawa, E. Matsumura, T. Koyanagi, T. Katayama, N. Kawano, K. Yoshimatsu, K. Yamamoto, H. Kumagai, F. Sato and H. Minami, *Nat. Commun.*, 2016, **7**.
358. I. J. Trenchard and C. D. Smolke, *Metab. Eng.*, 2015, **30**, 96-104.
359. S. Galanie and C. D. Smolke, *Microb. Cell Fact.*, 2015, **14**, 144.
360. J. N. Han and S. J. Li, *Commun. Chem.*, 2023, **6**, 27.
361. X. Y. Liu, X. Jiao, Y. T. Cheng, Y. Ma, J. L. Bu, B. L. Jin, Q. S. Li, Z. M. Hu, J. F. Tang, C. J. S. Lai, J. Wang, G. H. Cui, Y. Chen, J. Guo and L. Q. Huang, *Microb. Cell Fact.*, 2023, **22**, 23.
362. Y. R. Li and C. D. Smolke, *Nat. Commun.*, 2016, **7**.
363. Y. R. Li, S. J. Li, K. Thodey, I. Trenchard, A. Cravens and C. D. Smolke, *Proc. Natl. Acad. Sci. U. S. A.*, 2018, **115**, E3922-E3931.
364. J. T. Payne, T. R. Valentic and C. D. Smolke, *Proc. Natl. Acad. Sci. U. S. A.*, 2021, **118**, e2112520118.
