# Supplementary material for: Structural diversity, evolutionary origin, and metabolic engineering of plant specialized benzylisoquinoline alkaloids
Source: Royal Society of Chemistry journal article supplement (doi:10.1039/d4np00029c), 2024-01-01
Supplement: d4np00029c2.xlsx [file d4np00029c2.xlsx]

## Sheet: Supplementary Table 4
	Supplementary Table 4. The distributions of BIA biosynthetic key genes in a total of 245 reported plant genomes.
		Order	Family	Genus	Species 245	genome	NCS	OMT	NMT	CYP719	CYP80	CYP82	BBE and BBE-like
Chlorophyta		Chlamydomonadales	Chlamydomonadaceae	Chlamydomonas	Chlamydomonas reinhardtii	√	0	0	1	0	0	0	0
		Volvocales	Dunaliellaceae	Dunaliella	Dunaliella salina	√	0	0	0	0	0	0	0
		Mamiellales	Bathycoccaceae	Ostreococcus	Ostreococcus lucimarinus	√	0	0	1	0	0	0	0
		Chlamydomonadales	Coccomyxaceae	Coccomyxa	Coccomyxa subellipsoidea	√	0	0	1	0	0	0	0
		Mamiellales	Mamiellaceae	Micromonas	Micromonas pusilla	√	0	0	1	0	0	0	0
Rhodophyta		Bangiales	Bangiaceae	Porphyra	Porphyra umbilicalis	√	0	0	1	0	0	0	0
Bryophyta		Marchantiales	Marchantiaceae	Marchantia	Marchantia polymorpha	√	0	5	1	0	0	0	0
		Funariales	Funariaceae	Physcomitrium	Physcomitrella patens	√	0	0	1	0	0	0	0
		Sphagnales	Sphagnaceae	Sphagnum	Sphagnum magellanicum	√	0	28	3	0	1	0	0
Lycopodiophyta		Selaginellales	Selaginellaceae	Selaginella	Selaginella moellendorffii	√	0	5	3	0	0	0	0
Pteridophyta		Polypodiales	Pteridaceae	Ceratopteris	Ceratopteris richardii	√	0	4	3	0	3	0	1
		Salviniales	Salviniaceae	Azolla	Azolla filiculoides	√	0	2	1	0	0	0	1
				Salvinia	Salvinia cucullata	√	3	1	1	0	0	0	0
Gymnospermae		Pinales	Cupressaceae	Thuja	Thuja plicata	√	3	30	1	0	49	8	17
		Ginkgopsida	Ginkgoaceae	Ginkgo	Ginkgo biloba	√	0	20	1	0	19	4	11
ANA		Amborellales	Amborellaceae	Amborella	Amborella trichopoda	√	2	17	1	0	2	7	6
		Nymphaeales	Nymphaeaceae	Nymphaea	Nymphaea colorata	√	0	28	2	0	27	17	2
					Nymphaea thermarum	√	0	22	1	0	20	8	0
Magnoliids		Piperales	Piperaceae	Piper	Piper nigrum	√	9	73	46	4	23	28	16
				Aristolochia	Aristolochia fimbriata	√	4	30	8	8	13	17	6
			Magnoliaceae	Liriodendron	Liriodendron chinense	√	2	64	6	3	26	25	17
			Annonaceae	Annona	Annona cherimola	√	3	78	31	0	16	50	23
		Laurales	Lauraceae	Cinnamomum	Cinnamomum camphora	√	2	68	11	14	20	10	8
					Cinnamomum kanehirae	√	2	50	5	15	14	7	7
				Chimonanthus	Chimonanthus salicifolius	√	2	19	7	0	2	7	4
				Lindera	Lindera megaphylla	√	4	60	18	5	23	18	6
Monocots		Acorales	Acoraceae	Acorus	Acorus americanus	√	0	51	2	0	4	5	2
		Alismatales	Araceae	Spirodela	Spirodela polyrhiza	√	1	6	1	0	1	0	2
		Dioscoreales	Dioscoreaceae	Dioscorea	Dioscorea alata	√	4	31	1	0	3	6	5
					Dioscorea rotundata	√	4	39	3	0	4	9	4
		Asparagales	Orchidaceae	Apostasia	Apostasia shenzhenica	√	3	8	1	0	1	0	3
				Dendrobium	Dendrobium catenatum	√	0	9	1	0	4	0	5
				Phalaenopsis	Phalaenopsis equestris	√	0	7	1	0	2	0	6
				Vanilla	Vanilla planifolia	√	0	19	2	0	0	0	1
			Amaryllidaceae	Allium	Allium sativum	√	6	44	3	0	0	0	5
			Asparagaceae	Asparagus	Asparagus officinalis	√	1	11	1	0	2	1	5
		Arecales	Arecaceae	Calamus	Calamus simplicifolius	√	1	74	1	0	7	3	10
				Cocos	Cocos nucifera	√	2	15	1	0	2	3	6
				Elaeis	Elaeis guineensis	√	1	20	1	0	4	3	5
				Phoenix	Phoenix dactylifera	√	1	23	3	0	3	2	9
		Poales	Poaceae	Brachypodium	Brachypodium distachyon	√	2	5	1	0	3	0	3
					Brachypodium hybridum	√	4	8	2	0	4	0	6
					Brachypodium mexicanum	√	3	15	4	0	4	0	4
				Dichanthelium	Dichanthelium oligosanthes	√	2	11	1	0	1	0	5
				Digitaria	Digitaria exilis	√	4	24	2	0	5	0	16
				Eleusine	Eleusine coracana	√	7	7	2	0	8	0	8
				Eragrostis	Eragrostis curvula	√	7	15	1	0	7	0	13
				Hordeum	Hordeum vulgare	√	2	38	13	0	13	0	18
				Miscanthus	Miscanthus lutarioriparius	√	12	11	3	0	1	1	13
					Miscanthus sinensis	√	5	20	2	0	5	0	7
				Oropetium	Oropetium thomaeum	√	0	6	1	0	0	0	6
				Oryza	Oryza brachyantha	√	0	3	1	0	3	0	2
					Oryza sativa	√	1	8	1	0	5	0	5
				Panicum	Panicum virgatum	√	11	8	1	0	10	0	6
					Panicum hallii	√	4	23	3	0	6	0	15
				Paspalum	Paspalum vaginatum	√	0	6	1	0	0	0	4
				Setaria	Setaria italica	√	3	7	2	0	4	0	9
				Sorghum	Sorghum bicolor	√	3	13	1	0	3	0	6
				Thinopyrum	Thinopyrum intermedium	√	7	83	8	0	20	1	11
				Urochloa	Urochloa fusca	√	9	6	1	0	5	0	7
				Zea	Zea mays	√	1	3	5	0	3	0	5
				Zizania	Zizania palustris	√	2	9	3	0	5	0	5
			Cyperaceae	Kobresia	Kobresia littledalei	√	1	15	1	0	0	0	6
			Bromeliaceae	Ananas	Ananas comosus	√	1	10	1	0	4	0	3
			Joinvilleaceae	Joinvillea	Joinvillea ascendens	√	1	2	3	0	7	0	6
		Zingiberales	Musaceae	Musa	Musa acuminate	√	1	39	1	0	0	0	4
			Zingiberaceae	Zingiber	Zingiber officinale	√	2	35	8	0	0	0	5
Eudicotyledoneae	Early-diverging eudicotyledons	Ranunculales	Ranunculaceae	Aquilegia	Aquilegia coerulea	√	13	46	14	8	23	18	13
				Thalictrum	Thalictrum thalictroides	√	13	34	22	7	11	12	22
				Coptis	Coptis chinensis	√	11	39	20	3	6	29	13
			Circaeasteraceae	Kingdonia	Kingdonia uniflora	√	8	16	1	0	5	9	19
			Papaveraceae	Macleaya	Macleaya cordata	√	10	13	12	4	9	11	21
				Papaver	Papaver armeniacum	√	57	76	41	28	10	69	33
					Papaver atlanticum	√	3	38	12	14	4	23	18
					Papaver bracteatum	√	41	49	22	13	4	32	21
					Papaver californicum	√	32	41	14	10	2	23	17
					Papaver nudicaule	√	34	46	12	12	0	19	3
					Papaver rhoeas	√	52	73	31	15	13	63	27
					Papaver setigerum	√	88	146	43	27	21	99	58
					Papaver somniferum	√	47	59	22	12	8	49	25
				Corydalis	Corydalis tomentella	√	7	11	20	4	2	14	11
			Menispermaceae	Menispermum	Menispermum dauricum	√	16	59	17	3	13	9	29
				Stephania	Stephania cephalantha	√	7	58	27	3	22	12	30
					Stephania japonica	√	10	47	27	5	13	18	38
					Stephania yunnanensis	√	10	73	57	2	14	21	46
			Berberidaceae	Berberidaceae	Epimedium pubescens	√	7	76	13	25	15	9	13
			Lardizabalaceae	Akebia	Akebia trifoliata	√	5	17	5	0	8	16	4
		Proteales	Nelumbonaceae	Nelumbo	Nelumbo nucifera	√	7	22	1	1	8	4	8
		Trochodendrales	Trochodendraceae	Tetracentron	Tetracentron sinense	√	6	28	0	7	4	12	14
	Superrosids	Saxifragales	Crassulaceae	Kalanchoe	Kalanchoe fedtschenkoi	√	0	25	1	0	10	2	3
				Rhodiola	Rhodiola crenulata	√	1	10	2	0	4	1	5
		Vitales	Vitaceae	Vitis	Vitis vinifera	√	1	42	1	0	8	8	12
		Celastrales	Celastraceae	Tripterygium	Tripterygium wilfordii	√	2	34	1	0	7	38	16
		Oxalidales	Oxalidaceae	Averrhoa	Averrhoa carambola	√	0	38	1	0	4	0	30
		Malpighiales	Linaceae	Linum	Linum usitatissimum	√	1	19	2	0	24	11	19
			Salicaceae	Populus	Populus deltoides	√	0	42	2	0	16	21	46
					Populus trichocarpa	√	1	33	2	0	12	17	58
				Salix	Salix purpurea	√	1	20	1	0	12	23	36
			Euphorbiaceae	Hevea	Hevea brasiliensis	√	0	33	2	0	13	22	13
				Manihot	Manihot esculenta	√	1	32	3	0	7	32	14
				Ricinus	Ricinus communis	√	0	35	2	0	6	13	11
				Jatropha	Jatropha curcas	√	2	20	1	0	8	18	10
		Fabales	Fabaceae	Lotus	Lotus japonicus	√	3	23	2	0	3	18	7
				Trifolium	Trifolium pratense	√	1	31	1	0	5	9	5
				Abrus	Abrus precatorius	√	1	21	1	0	6	10	9
				Arachis	Arachis hypogaea	√	2	44	2	0	12	38	18
					Arachis ipaensis	√	1	21	1	0	8	20	8
				Cajanus	Cajanus cajan	√	1	24	1	0	5	12	15
				Cicer	Cicer arietinum	√	1	19	3	0	8	7	11
				Glycine	Glycine max	√	1	37	4	0	6	24	23
					Glycine soja	√	1	39	2	0	8	23	25
				Lupinus	Lupinus albus	√	0	22	1	0	2	5	4
				Medicago	Medicago truncatula	√	2	36	1	0	12	17	20
					Medicago polymorpha	√	0	6	1	0	0	0	0
				Phaseolus	Phaseolus acutifolius	√	1	17	1	0	3	18	14
					Phaseolus lunatus	√	1	32	2	0	4	16	17
					Phaseolus vulgaris	√	1	23	1	0	2	19	15
				Senna	Senna tora	√	2	37	2	0	6	12	11
				Spatholobus	Spatholobus suberectus	√	2	23	1	0	5	5	9
				Vigna	Vigna radiata	√	0	6	0	0	1	1	17
					Vigna unguiculata	√	1	25	3	0	3	21	21
		Rosales	Rosaceae	Fragaria	Fragaria vesca	√	2	13	1	0	0	4	8
				Prunus	Prunus persica	√	1	27	1	0	5	19	26
				Pyrus	Pyrus bretschneideri	√	0	26	1	0	6	26	23
				Rosa	Rosa chinensis	√	2	36	1	0	9	22	7
			Moraceae	Morus	Morus notabilis	√	1	30	1	0	9	13	18
			Cannabaceae	Cannabis	Cannabis sativa	√	6	33	3	0	7	5	24
				Parasponia	Parasponia andersonii	√	1	15	1	0	5	11	27
				Trema	Trema orientalis	√	1	21	1	0	5	14	27
			Rhamnaceae	Ziziphus	Ziziphus jujuba	√	1	47	6	0	14	17	15
		Cucurbitales	Cucurbitaceae	Citrullus	Citrullus lanatus	√	3	15	2	0	5	14	18
				Cucumis	Cucumis melo	√	1	18	2	0	3	10	15
					Cucumis sativus	√	2	11	1	0	3	13	15
				Lagenaria	Lagenaria siceraria	√	2	20	3	0	4	11	17
				Benincasa	Benincasa hispida	√	3	20	12	0	4	21	15
				Cucurbita	Cucurbita moschata	√	2	30	1	0	6	22	14
				Momordica	Momordica charantia	√	2	18	4	0	6	13	18
		Fagales	Juglandaceae	Carya	Carya illinoinensis	√	3	59	5	0	10	31	14
				Juglans	Juglans regia	√	4	40	2	0	9	24	18
			Betulaceae	Betula	Betula pendula	√	2	39	1	0	10	20	16
					Betula platyphylla	√	3	35	1	0	18	15	20
				Carpinus	Carpinus fangiana	√	3	34	2	0	3	15	16
			Myricaceae	Morella	Morella rubra	√	0	26	2	0	8	19	12
			Fagaceae	Castanea	Castanea dentata	√	7	46	1	0	25	25	18
				Quercus	Quercus rubra	√	6	59	1	0	28	30	8
		Myrtales	Myrtaceae	Corymbia	Corymbia citriodora	√	9	50	1	0	19	40	24
				Eucalyptus	Eucalyptus grandis	√	3	55	1	0	21	29	21
			Lythraceae	Punica	Punica granatum	√	2	21	1	0	15	27	9
			Rutaceae	Citrus	Citrus clementina	√	2	72	1	0	16	27	40
					Citrus sinensis	√	2	56	5	0	7	14	21
				Phellodendron	Phellodendron_amurense	√	2	91	7	0	10	17	44
				Poncirus	Poncirus trifoliata	√	2	54	1	0	14	27	30
			Anacardiaceae	Anacardium	Anacardium occidentale	√	3	27	5	0	7	11	13
				Pistacia	Pistacia vera	√	4	44	1	0	11	22	19
				Mangifera	Mangifera indica	√	2	32	2	0	8	10	17
			Sapindaceae	Acer	Acer yangbiense	√	1	32	1	0	9	16	39
		Malvales	Malvaceae	Corchorus	Corchorus olitorius	√	3	35	2	0	1	8	0
				Durio	Durio zibethinus	√	5	25	0	0	6	20	36
				Gossypium	Gossypium barbadense	√	9	72	4	0	16	58	55
					Gossypium hirsutum	√	8	54	3	0	19	50	41
					Gossypium mustelinum	√	6	68	4	0	21	59	42
					Gossypium raimondii	√	4	34	2	0	7	28	8
					Gossypium tomentosum	√	6	59	6	0	18	46	48
				Theobroma	Theobroma cacao	√	6	21	1	0	5	17	23
				Hibiscus	Hibiscus syriacus	√	2	43	3	0	8	29	25
		Brassicales	Caricaceae	Carica	Carica papaya	√	1	7	1	0	4	2	11
			Brassicaceae	Alyssum	Alyssum linifolium	√	0	27	2	0	6	3	15
				Arabidopsis	Arabidopsis halleri	√	0	10	1	0	4	4	5
					Arabidopsis lyrata	√	0	12	3	0	2	8	11
					Arabidopsis thaliana	√	0	10	2	0	6	4	6
				Arabis	Arabis nemorensis	√	0	7	1	0	6	1	14
				Boechera	Boechera stricta	√	0	17	1	0	4	2	7
				Brassica	Brassica oleracea	√	0	17	3	0	4	5	17
					Brassica rapa	√	0	18	2	0	6	3	12
				Cakile	Cakile maritima	√	0	19	2	0	5	6	15
				Camelina	Camelina sativa	√	0	27	3	0	21	10	27
				Capsella	Capsella grandiflora	√	0	7	1	0	3	3	8
					Capsella rubella	√	0	11	1	0	3	2	9
				Crambe	Crambe hispanica	√	0	20	2	0	6	2	10
				Diptychocarpus	Diptychocarpus strictus	√	0	17	0	0	6	3	13
				Eutrema	Eutrema salsugineum	√	0	14	1	0	3	1	7
				Iberis	Iberis amara	√	0	28	4	0	10	2	18
				Isatis	Isatis tinctoria	√	0	50		0	9	7	45
				Lepidium	Lepidium sativum	√	0	16	2	0	9	3	14
				Lunaria	Lunaria annua	√	0	13	1	0	4	5	9
				Malcolmia	Malcolmia maritima	√	0	11	1	0	5	3	8
				Microthlaspi	Microthlaspi erraticum	√	0	17	1	0	5	6	14
				Myagrum	Myagrum perfoliatum	√	0	11	1	0	7	2	6
				Raphanus	Raphanus sativus	√	0	30	3	0	11	2	15
				Stanleya	Stanleya pinnata	√	0	19	2	0	2	2	15
				Sinapis	Sinapis alba	√	0	24	4	0	10	4	20
				Thlaspi	Thlaspi arvense	√	0	14	2	0	7	3	8
			Cleomaceae	Cleome	Cleome violacea	√	0	14	4	0	6	2	4
				Tarenaya	Tarenaya hassleriana	√	0	23	2	0	6	8	10
	Superasterids	Caryophyllales	Amaranthaceae	Amaranthus	Amaranthus hypochondriacus	√	0	8	1	0	1	1	6
				Beta	Beta vulgaris	√	1	24	1	0	3	1	4
				Chenopodium	Chenopodium quinoa	√	0	44	3	0	8	10	14
				Spinacia	Spinacia oleracea	√	0	11	1	0	7	2	4
			Polygonaceae	Fagopyrum	Fagopyrum tataricum	√	0	32	1	0	12	3	7
			Caryophyllaceae	Dianthus	Dianthus caryophyllus	√	1	30	1	0	8	18	12
			Portulacaceae	Portulaca	Portulaca amilis	√	0	42	4	0	14	12	21
		Cornales	Hydrangeaceae	Hydrangea	Hydrangea quercifolia	√	2	14	5	0	15	13	9
			Nyssaceae	Camptotheca	Camptotheca acuminata	√	2	29	2	0	12	12	14
				Nyssa	Nyssa sinensis	√	1	19	1	0	7	20	15
		Ericales	Actinidiaceae	Actinidia	Actinidia chinensis	√	0	11	1	0	9	11	20
			Ericaceae	Rhododendron	Rhododendron delavayi	√	0	16	1	0	10	17	15
			Theaceae	Camellia	Camellia sinensis	√	3	37	3	0	6	16	10
		Solanales	Solanaceae	Capsicum	Capsicum annuum	√	5	42	1	0	11	12	25
				Nicotiana	Nicotiana attenuata	√	5	16	1	0	12	6	12
				Petunia	Petunia axillaris	√	3	27	1	0	1	1	10
				Solanum	Solanum lycopersicum	√	3	17	1	0	14	7	17
					Solanum tuberosum	√	3	31	0	0	17	11	15
			Convolvulaceae	Cuscuta	Cuscuta australis	√	0	2	1	0	0	2	3
					Cuscuta campestris	√	0	6	2	0	2	3	10
				Ipomoea	Ipomoea trifida	√	2	27	1	0	9	42	14
		Gentianales	Rubiaceae	Coffea	Coffea canephora	√	3	36	3	0	8	8	24
				Gardenia	Gardenia jasminoides	√	1	31	2	0	12	14	19
			Gelsemiaceae	Gelsemium	Gelsemium sempervirens	√	1	14	1	0	18	1	36
			Apocynaceae	Catharanthus	Catharanthus roseus	√	1	26	1	0	8	1	7
		Lamiales	Lentibulariaceae	Genlisea	Genlisea aurea	√	1	8	1	0	0	0	0
				Utricularia	Utricularia gibba	√	0	4	2	0	0	3	1
			Orobanchaceae	Lindenbergia	Lindenbergia philippensis	√	1	15	1	0	9	4	22
				Striga	Striga asiatica	√	0	8	1	0	3	6	3
			Phrymaceae	Erythranthe	Erythranthe guttata	√	1	11	1	0	12	7	14
				Mimulus	Mimulus guttatus	√	1	7	1	0	12	6	15
			Pedaliaceae	Sesamum	Sesamum indicum	√	4	23	3	0	13	7	23
			Acanthaceae	Andrographis	Andrographis paniculata	√	0	7	1	0	1	4	14
			Oleaceae	Olea	Olea europaea	√	1	19	1	0	10	6	25
			Bignoniaceae	Handroanthus	Handroanthus impetiginosus	√	1	39	2	0	5	13	1
			Plantaginaceae	Antirrhinum	Antirrhinum majus	√	2	44	2	0	16	4	33
			Lamiaceae	Salvia	Salvia miltiorrhiza	√	2	18	1	0	0	3	0
					Salvia splendens	√	1	28	5	0	1	0	79
				Scutellaria	Scutellaria baicalensis	√	1	56	1	0	7	13	19
					Scutellaria barbata	√	1	25	1	0	7	15	9
				Perilla	Perilla citriodora	√	0	15	2	0	2	17	9
			Scrophulariaceae	Buddleja	Buddleja alternifolia	√	1	11	1	0	3	1	20
		Boraginales	Boraginaceae	Lithospermum	Lithospermum erythrorhizon	√	0	20	3	0	6	4	8
		Asterales	Asterales	Helianthus	Helianthus annuus	√	9	44	2	0	19	28	12
				Lactuca	Lactuca sativa	√	4	27	1	0	13	45	13
				Cynara	Cynara cardunculus	√	13	12	1	0	26	15	7
				Erigeron	Erigeron canadensis	√	4	24	1	0	16	22	7
				Mikania	Mikania micrantha	√	4	28	1	0	15	24	17
		Apiales	Apiaceae	Daucus	Daucus carota	√	3	12	1	0	6	2	16
			Araliaceae	Panax	Panax notoginseng	√	1	16	3	0	7	12	37
		Dipsacales	Caprifoliaceae	Lonicer	Lonicera japonica	√	0	14	3	0	4	13	42

## Sheet: Supplementary Table 5
Supplementary Table 5. The information of download genes.
Family	Subfamily	ID	Genbank ID/DOI	Species	Enzyme
PR10 Bet_v1	Dicot PR-10	Arahy_PR-10	Q0PKR4	Arachis hypogaea
		Dauca_PR-10	Q75T31	Daucus carota
		Solvi_PR-10	Q4KYL1	Solanum virginianum
		Vitvi_PR-10	Q9FS42	Vitis vinifera
	Monocot PR-10, type I	Horvu_PR-10	Q84QC7	Hoerdeum vurlgare
		Orysa_PR-10a	Q9LKJ9	Oryza sativa
	Monocot PR-10, type II	Hyaor_PR-10	Q5YJR3	Hyacinthus orientalis
		Zeama_PR-10	Q29SB6	Zea mays
	Conifer PR-10	Picgl_PR-10.2	Q9SNX6	Picea glauca
		Pseme_PR-10	Q9M664	Pseudotsuga menziesii
	Cytokinin-specific binding proteins	Luplu_CSBP	Q9FYU3	Lupinus luteus
		Vigra_CSBP	BAA74451.1	Vigna radiata
	(S)-Norcoclaurine synthases/NCS	CjNCS	BAF45338.2	Coptis japonica
		PbNCS	ACO90258.1	Papaver bracteatum
		PsNCS2	AAX56304.1	Papaver somniferum
		PsNCS1	AAX56303.1	Papaver somniferum
		TfNCS	ACO90248.1	Thalictrum flavum
		TfNCS2	ACO90247.1	Thalictrum flavum
		CmNCS1	10.1038/srep39256	Chelidonium majus
		NdNCS3	10.1038/srep39256	Nandina domestica
		ScNCS1	10.1038/srep39256	Sanguinaria canadensis
		XsNCS1	10.1038/srep39256	Xanthorhiza simplicissima
	Moss PR-10-related	Ficaw_RIP	Q71HN3	Ficus awkeotsang
		Phypa_PR10_1	Q9AXI3	Physcomitrella patens
	Major latex proteins/ripening-related proteins	Arath_MLP-1	Q39132	Arabidopsis thaliana
		Betvu_MLP	Q949M0	Beta vulgaris
		Prupe_MLP	Q9AXU0	Prunus persica
	Plant polyketide cyclase-like	Arath_At2g38310	O80920	Arabidopsis thaliana
		Nicta_c17	Q53HY7	Nicotiana tabacum
CYP719	CYP719A	AmCYP719A13	ABR14721.1	Argemone mexicana	(S)-canadine synthase/(S)-stylopine synthase
		AmCYP719A14	ABR14722.1	Argemone mexicana	cheilanthifoline synthase
		CjCYP719A1	BAB68769.1	Coptis japonica	methylenedioxy bridge-forming enzyme
		CmCYP719A-c1128	MF039641	Chelidonium majus
		CmCYP719A-c8931	MF039640	Chelidonium majus
		CyCYP719A38	10.1186/s12934-023-02024-2	Corydalis yanhusuo	(S)-stylopine synthase
		CyCYP719A39		Corydalis yanhusuo	(S)-stylopine synthase
		CyCYP719A40		Corydalis yanhusuo	(S)-stylopine synthase
		CyCYP719A41		Corydalis yanhusuo	(S)-canadine synthase//S)-stylopine synthase
		CyCYP719A42		Corydalis yanhusuo	(S)-canadine synthase/(S)-stylopine synthase
		EcCYP719A2	BAD98250.1	Eschscholzia californica	(S)-stylopine synthase
		EcCYP719A3	BAD98249.1	Eschscholzia californica	(S)-stylopine synthase/(S)-nandinine synthase/(S)-canadine synthase
		EcCYP719A5	BAG75113.1	Eschscholzia californica	cheilanthifoline synthase
		EcCYP719A9	AB434655	Eschscholzia californica	accepts (R,S)-reticuline as substrate
		PsCYP719A20	AHF65153	Papaver somniferum
		PsCYP719A25	ADB89213	Papaver somniferum
		PsCYP719A	ADB89214	Papaver somniferum	SPS/stylopine synthase
		PsCYP719A21	JQ659003	Papaver somniferum
		PnCYP719A37	MT643912	Piper nigrum
		PhCYP719A23	KC110997	Podophyllum hexandrum	converting (-)-matairesinol into (-)-pluviatolide
		PpCYP719A24	KC110998	Podophyllum peltatum
		TfCYP719A	AAU20771	Thalictrum flavum	CAS/(S)-canadine synthase
	CYP719B	PsCYP719B1	ABR14720.1	Papaver somniferum	salutaridine synthase
CYP80	CYP80A	BsCYP80A1	AAC48987.1	Berberis stolonifera	bisBIAs synthase
	CYP80B	CjCYP80B2	BAB12433.1	Coptis japonica	(S)-N-methylcoclaurine-3'-hydroxylase
		PsCYP80B1	AAF61400.1	Papaver somniferum	(S)-N-methylcoclaurine-3'-hydroxylase
		TfCYP80B	AAU20767.1	Thalictrum flavum	(S)-N-methylcoclaurine 3'-hydroxylase
		AcCYP80B8	10.1111/tpj.16686	Aristolochia contorta
	CYP80G	CjCYP80G2	BAF80448.1	Coptis japonica	corytuberine synthase
		AcCYP80G7	EVM0008901	Aristolochia contorta	corytuberine synthase
		LsCYP80G	10.1016/j.ymben.2023.03.010	Laurelia sempervirens	Aporphine synthase
	CYP80Q	NnCYP80Q1/NnCYP80G	WEE66561.1	Nelumbo nucifera	Aporphine synthase, glaziovine synthase
		NnCYP80Q2/NnCYP80A	WEE66562.1	Nelumbo nucifera	bisBIAs synthase
		AcCYP80Q7	10.1111/tpj.16686	Aristolochia contorta
		AcCYP80Q8	EVM0012200	Aristolochia contorta	GS，glaziovine synthase
	CYP80F	AbCYP80F1	AHZ34577.1	Atropa belladonna
		SlCYP80E6	XP_004245646.1	Solanum lycopersicum
	CYP80Y	AcCYP80Y8	10.1111/tpj.16686	Aristolochia contorta
CYP76	CYP76C	AtCYP76C1	NP_850439.1	Arabidopsis thaliana
	CYP76G	AtCYP76G1	NP_190865.2	Arabidopsis thaliana
	CYP76O	GmCYP76O2	NP_001276177.2	Glycine max
CYP82	CYP82A	GmCYP82A3	NP_001240972.1	Glycine max
	CYP82C	AtCYP82C2	NP_194925.1	Arabidopsis thaliana
		CsCYP82C4	XP_030511178.2	Cannabis sativa	xanthotoxin 5-hydroxylase
		GmCYP82C4	XP_003523888	Glycine max	xanthotoxin 5-hydroxylase
		NtCYP82C4	kAF3787788.1	Nymphaea thermarum
	CYP82D	PnCYP82D47	WOX58880.1	Phyla nodiflora
		PyCYP82D47	PQM41044.1	Prunus yedoensis
	CYP82E	NtCYP82E4v1	ABA07805.1	Nicotiana tabacum
	CYP82G	AtCYP82G1	NP_189154.1	Arabidopsis thaliana
	CYP82M	AbCYP82M3	AYU65303.1	Atropa belladonna	tropinone synthase
	CYP82N	PsCYP82N3	AGC92397.1	Papaver somniferum	P6H/protopine 6-hydroxylase)
		PsCYP82N4	AGC92398.1	Papaver somniferum	MSH/(S)-cis-N-methylstylopine 14-hydroxylase
	CYP82P	EcCYP82P2	BBD34756.1	Eschscholzia californica	DB10H/dihydrosanguinarine 10-hydroxylase
	CYP82X	PsCYP82X1	AFB74614.1	Papaver somniferum	(13S,14R)-13-O-acetyl-1-hydroxy-N-methylcanadine 8-hydroxylase
		PsCYP82X2	AFB74616.1	Papaver somniferum	(S)-1-hydroxy-N-methylcanadine 13-hydroxylase
	CYP82X	PsCYP82Y1	AFB74617.1	Papaver somniferum	1-hydroxy-N-methylcanadine synthase
		PsCYP82Y2	AKN63431.1	Papaver somniferum	STORR/Bifunctional protein
CYP51		AtCYP51G1	AT1G11680	Arabidopsis thaliana

## Sheet: Supplementary Table 6
Supplementary Table 6. The homologous gene sequences of characterized NCS genes in 245 species.
gene id	rename	sequence
Akebia_trifoliata|GWHPBISH000081		MVMGQLSSELEVRVSANELWDVYSTLKLAKLVCELLPDVVEKFEVMEGDGGVDTVLKLTFSSGTSYKEKFTKIDHENRLKEAEVVEGGYLELGFSLYRVSFEIIEKDTDSSIIKSTIEYEIDEESASNVSLISIKPLEAISQVIGKYFIEKKANASS
Akebia_trifoliata|GWHPBISH000221		MHGEVSTQFEVSAPANDVWAVFRSPKLASLLLTLLPTLFEKIDVIEGDGSAGTVLQIGLTTGAPEPRSWKEKFVTIDDEKRMKVVQMIEGGYLDLGFDLYEFIFKIIEKDANSCIIKSNIVLEADDDKFEASASLIGPTAPWLVSKPIANYVVTEKVNASCK
Akebia_trifoliata|GWHPBISH004703		MHGEVSTQFEVSAPANDVWAVFRSPKLASLLITLLPTLIEKLDVIEGDGSAGTVLDIGLAAGAPELRSWKEKFVTIDDEKRMKVVQMIEGGYLDLGFDLYKFIFKIIEKDANSCIIKSTIVLEADDDKFEASASLIGPTAPWLSSKAIANYVVTEKVNASCK
Akebia_trifoliata|GWHPBISH004704		MHGEVSTQFEVSAPANDVWAVFRSPKLASLLITRLPTLFEKIDVIEGDGSAGTVLDIGLAAGAPGPRSWKEKFVTIDDEKRLKVVQMIEGGYLDLGFDLYEFIFKIIEKDANSCIIKSTIVLEADDDKFEASASLIGPTAPWLFSKAIANYAVTEKVNASCK
Akebia_trifoliata|GWHPBISH004709		MVMGQLSSELEVSVSATELWDVYSTLKLAKLVCELLPDVVKKFEVMEGDGGVDTVLKLTFSSGTSYKEKFTKIDHENRLKEAEVVEGGYLELGFSLYRVSFEIIEKDTDSSIIKSTIEYEIDEESASNVSLISIKPLEAISQVIGKYFIEKKANASS
Amborella_trichopoda|evm_27.model.AmTr_v1.0_scaffold00048.12		MEGLVWDELQVKISADALWDVYGTGKLGNLIPKLIPNIINAIHFLEGDGAEGTVIHICFAPGTPGPSSYKERFVKIDNEARVKEALAIEGLKEFGFKKYLVRLEIQEKPGGISVIKSSIQYEIDEEHAWTPPPITIMPFKLIAEKVANYLSESH*
Amborella_trichopoda|evm_27.model.AmTr_v1.0_scaffold00048.13		MEGKVWQEVEVKVSADALWDVYGTLKLGNLIPKLLPNFFQATHVLEGAGGVGTIIHICFPPGASGPSSYKEKFVKIDDVARVKETLAIEGLQELGFKKYLVRLEIQEKPGGTSVIKSTIEYEVDEEHAWAPPPVTIMLLKLIAETISNYLSESK*
Annona_cherimola|Anche102Chr1g0036270.1		MVAGSLTEEIIASVTTERWWKAGIRHGHNLIPQLIPDIVESVELLEGDGGAGTVMEFNFIPGWAYRYVTDRVEVVGDDNDVFGYSVIDGGSIGTKMDSISFELNFKPTSIDEGCKLTLKVVYDSEEDGPDAGLGAVKAKEGVLDDESRCNLFAQKCKCFRMRAEDMQPLESGTPNLVGFMPASPIYHHRFLILGAQNLGLCNGGHEEVARFEKKDN
Annona_cherimola|Anche102Chr4g0033530.1		MQGSVSHEWEVHVPASVVWQTYGTLALGDAVVQLLPGLIEKIDVVEGDGGVGTVLALTFPQGTPGFGCYKEKFVKVDDANRVKETEVVEGGFLLLGFTKYLVRLEVIEKDGNAASSIIKSTIEYEIAQGSNADSSVVTTKALEMIAQSVGKYLEDKTTALAAARTLPLLFWRESPNAVAGHLVLLPRCQQVHRSRLLLLGFAASSVDSCYRSPHHCSFVTACLERIRTPPATASTDLPSVAACAEPPVLPPRTGRSSAASSLSSARCATGNPHDPTASSPACTRTTVARVTARVWLPARNQKDYLEPESAACQESST
Annona_cherimola|Anche102Chr5g0037540.1		MRGIKTTETELDVPVADVWDLYGTLKLAKLMEERLPMLVDKITIDGNGGVGTVLHIRLTRGLPFSHYKEKIVLLDNENHVKIMEASAAYLLQKKFEASIRSALSGEYSEDDDLIISLAAADDDQEMVGTARSVPPNAKETEAGARSISPTTRPPTTAEEIDHSVRSVRPQHPSATTE
Chimonanthus_salicifolius|Cs05g02271		MEYKPSLPSAKEEKRARVTLASKLCVSKGKERTQIRMHGQKSHELEIEAAASELWEIYGTLQLAQLVSQHLPNVVEKVELLEGDGGTGTVFHLTFPSEAVGARTYKERFVKVDNEKRMKVAEVIEGGFLEMGFRLYRLRFEVIEKGSQASIIRSTIEYEIEDEFAANESLVTTQPLAVIAEFVDKYLSDKKSITPNNGV*
Chimonanthus_salicifolius|Cs05g02272		MPYFVSHELEVGVAAEILWKTYGTLELGNLVVKLLPNVIQKVELVEGDGGIGTVLAVTFSPDVPGVGTYKEKFINIDNEKRIKVVDVVEGGYLDLGFLLYRVRFEVVEKGPDASIIKSAVEYEVAEESAANVSMVTTKPLEVIAEVIGKYLVEKKANATT*
Cinnamomum_camphora|Ccam07T000143.1		MKGQLSHESEIDVPAGVVWETYGTLELSKQIAKLLPNLVQNIQVLEGDGGVGTVLAITLAPNVAGFSGYKEKFTKVDNEKHVKEVEMVEGGFLDMGFLLYRIRLEILERDGDSSIIRSTVEYEIAEESAAYASLITTDMLAIIAEVVGKHIAEEYKAKNNNNNKKMIKEQLSHELEVSVPATVVWETYGSTLQLNKLTVKLLPNVALDLQVMEGNGGVGTLVSLEVYKSKLTKIDNENRVREVELVEGEYLVVGFLLYRVRFEILEKDDDSSIIQSTIEYELAEESVVYASLVSINSLATIAEVVGKHLTEEYKAKLKA*
Cinnamomum_camphora|Ccam07T000144.1		MMKGQVLHELEVGAPAAVVWETYGTLQLGKLVVKLLPNIFQDVQAEGDGGVGTVLSLTFAPGAPAFAVYKEKFTKIDHENRVKETEVVEGGFLDLGFLLYRIRLQVLEKDSNSSIIQSTIEYELAEESAANVSLVSTDSLVAIAEVIGNHLAEEYKAKLNS*
Corydalis_tomentella|GWHPAORS020634		MRKHLVSELEVDVPAGTLWTIYSTTQFPNLVVQLLPTVVRNIEIDGDGSLGTALNVTFAPRSVPLLYKEKIVTIDHEKCLKEVLQIEGGYLDLGCSFYMSSFQNLEKGCDSFIIKSMVTYELAKDANPGVADLITIAAHAAIAQVISKYVLDKQVAATP
Corydalis_tomentella|GWHPAORS022300		MNLMWVVMAFKHMEITWFRAMELNLLLTNMESCSLTDGEDMRQRSRAESIRVIRMRKHIVNELEVAAPPDTLWAIYSTLQFPNLVDQLLPTVFQNIEIDGDGSPGTVLNVIFVPGTIPPSYKGKYVTIDHENRLKEMVHIEGGYLEIGCSFYMNSFQIVEKDCESCIIKSMVTYELAENADPAAEDLIDNIVVLAAIAQAMSKYVLDKQSETVP
Corydalis_tomentella|GWHPAORS022301		MVVQGKVSSTVEVGVPANEVWEIYGTLKLGKLVDELLPHVVGKVELVEGDGGVGTVFKVTFPPGTPGASYLKEKFTKVDNENRVKETEVIEGGLLDFGFTLYRVILEIADKFDDTNSSIIKSTIEYEIEDDSADNASFVSLKPFEDTAEAVQQYLLEKARN
Corydalis_tomentella|GWHPAORS022302		MRKHIVHELEVPTSADALWAIYSSPQFPKLIVELLPTVFQKIELIEDDQSPDTIFNVTLVPGMIMPCYKGKLVMIDHEKRLKGVEQIEGGYLELGCSYYMNSLQIMKKDCDSCIIKYTVTYELAKDANPNVDELVNNTTVVASVAQALSKYVLDKK
Corydalis_tomentella|GWHPAORS022305		MRKHLVNELEVAVPADTLWAIYSTTQFPKLVVQLLPTVVQNIEIDGDGSLGTILNVIFVPGSVPLSYKEKIMTIDHEKRLKEVVQIEGGYLDLGCSFYMSSFQILEKGSDSCIIKSMVTYELDKDADPSVADLVTIAAHAAIAQLISEYVLDKQVAASP
Corydalis_tomentella|GWHPAORS022306		MRKELTHELEVAAPADAVWAVYSSPDLPKIIVELLPSVFKKIEIVEGDGGVGTVLHLVFPPGSIPLTYKEKFVTIDHEKRLKEVLQIEGGYLDLGCTFYMDSFHILEKDYDSCIIKSITTYEVRDDVVDNVSSLISIDSLANMAEAISKYVLEKQEAATKHGHGDDKERTGLCWPFNCLG
Corydalis_tomentella|GWHPAORS022308		MRGHVTNEMDVPLPADAIWAIYGSPDLPKLIIDLQPGVFESIDILKGDGRTGTILHIVLAAGIPGPREWKEKFTVVDDATQTKVIRQIEGEFLDIGFTFYQLTFEIIEKDVHSCIIRSTTTYEVDDKFDTNASMITADALWGMAKSIVKYATENAKKPC
Nelumbo_nucifera|NNU_21731-RA	NnNCS1	MMIGRVVNEMEVGVPADDIWAVYSSPELPRLFVQLMPNVYKKIDILQGDGTVGTVLHIELADGIPEPRTWKEKFIKIDHQHREKVVRQIEGGFLDMGFRVFDVIFKIIEKDACSCIIRSTTAFELDEKFENNANLITAGNLWGAAKAISNYVIQNKSKRRNH*
Nelumbo_nucifera|NNU01g06688	NnNCS7	MMTARVTNEMEVGVPADDVWAVYGSPDLPKLFVQLMPQVYKRNDVLEGDGTVGTVILIELDDALPEPRIW KEKFIKIDHQEREKLVRVIEGGFLDIGFRSFDIIFKVIEKDASSCIIQSTTAFELDDKFEDNANRITAGT LWWVAKAISNYVIQNKSKSKGDNN
Nelumbo_nucifera|NNU01g06689		MMTARVTNEMEVGVPADDVWAVYGSPDLPKLFVQLMPQVYKRNDVLEGDGTVGTVILIELDDALPEPRIW KEKFIKIDHQEREKLVRVIEGGFLDIGFRSFDIIFKVIEKDASSCIIQSTTAFELDDKFEDNANRITAGT LWWVAKAISNYVIQNKSKSKGDNN
Nelumbo_nucifera|NNU01g06690		MMTARVTNEMEVGVPADDVWAVYGSPDLPKLFVQLMPQVYKRNDVLEGDGTVGTVILIELDDALPEPRIW KEKFIKIDHQEREKLVRVIEGGFLDIGFRSFDIIFKVIEKDASSCIIQSTTAFELDDKFEDNANRITAGT LWWVAKAISNYVIQNKSKSKGDNN
Nelumbo_nucifera|NNU01g06691		MMTARVTNEMEVGVPADDVWAVYGSPDLPKLFVQLMPQVYKRNDVLEGDGTVGTVILIELDDALPEPRIW KEKFIKIDHQEREKLVRVIEGGFLDIGFRSFDIIFKVIEKDASSCIIQSTTAFELDDKFEDNANRITAGT LWWVAKAISNYVIQNKSKSKSNNN
Nelumbo_nucifera|NNU01g06692		MMTARVTNEMEVGVPADDVWAVYGSPDLPKLFVQLMPQVYKRNDVLEGDGTVGTVILIELDDALPEPRIW KEKFIKIDHQEREKLVRVIEGGFLDIGFRSFDIIFKVIEKDASSCIIQSTTAFELDDKFEDNANRITAGT LWWVAKAISNYVIQNKSKSKGDNN
Nelumbo_nucifera|NNU01g06693	NnNCS4	MHAGQLSHELEVAVPASEVWEIYGTLKLGKLCEELLPDVIHKAEVVEGDGGVGTVLKVTLPPGLVSYKEK FTKIDNEKRLKEVEVVEGGALDLGFRLYRIRLEIIEKTEVSSLIKSTVEYEIDDESANNPSFATTKPLEQ IAMAMGKYLTELKTE
Nelumbo_nucifera|NNU03g02323	NnNCS3	MRGQVTNELDVDVPVDDIWAVYGTPVLPTHIVQLQPDVFQKVDFIHGNGGVGTILYVQLVPGAPEPRTWK EKFIKIDDEERLKVIRMIEGGYLDLGFTLFEYNTQIIEKDAESCTIRSTTVFEVDEKFEANAALINATSA YGLAKAVANYVIQKKAKACDV
Aquilegia_coerulea|Aqcoe4G229600.1.p		MRGHVESEYEVAVSADEIWAVYSSPDLPRLIVELMPTRYERIDVLEGDGTEGTIIRNYLVPANPQPLTWNEKFMKIDNKTRTKVVRHIEGGWLDMGFTLYENIFTVIKKDKNSCIITQRTVFDVAEEFESNASLISSSWGMARAVANYVIQNRANKDDNKKSANRVGCF*
Aquilegia_coerulea|Aqcoe4G228900.1.p		MRGHVESEYEVAVSADEIWAVYSSPDLPRLIVKLMPTRYQKIDVLEGDGTEGTIIRNYLVPANPQPLTWNEKFIKIDNKTRTKVLEGGWLDMGFTLYENIFTVIKKDKNSCIITQRTVFDVAEEFESNASLISSSWAMARAVANYVIQNHDQDGISCPCKNCKNLNNESCGTVHHCLQAILERKIL*
Aquilegia_coerulea|Aqcoe4G248700.1.p		MVSSIAFAKKSLFLVLTVFLLSHHFHCEAQVSLPAQVWSELAVSDISAQDVWDVYSSPDLPRLIVELMPFRFQRIDVLSGDGTQGTILNITLQPTNSGPLTWHEQFVEINHLTRTKVVRQIEGGFLNIGFTLYENIFKITSTGSSSCVIRATNSFVITQGSESGASLITASWRMAYAVVDYIHANRANNYLASKTDVE*
Aquilegia_coerulea|Aqcoe7G434000.1.p		MAFAKKSLFVVLAVFLLSHLGCEAQVQLPANVWSELAVADISAEDVWAIYSSPGLPRLIVELMPFRFQRIDVLSGDGTQGTILNITLQPTNSGPLTWHEQFVEINHRTRTKVVRQINGGFLNIGFTLYENIFQIRKTGRNSCVIRATNNFIILQGSESGASFITASWRMAYAVVDYIRANRANNYLASKTDSQ*
Aquilegia_coerulea|Aqcoe1G268200.1.p		MEGHLSHELEVNVPANEVWEVYRGLELGRLVTELLPNLIEKVELVEGDGGVGTILNVVFPIPPETPAIFTSWKEKFTKIDDEKRLKEAEVIEGAFLQLGFSLYRVTFVINEKDANSCIIKSMVDYKLDTESAANASLVSTQALELIAQAIGKYLTDKKN*
Aquilegia_coerulea|Aqcoe3G428200.1.p		MRAEVWSELEVSLPADDIWAVYSSPDLPRLIVELMPTRFQRIDVLKGDGTEGTILHITLQPTNSGPLVWNEQFTTIDHANRIKVVRQIEGGFLDIGFTLYENIFTITARGPNACTIRATASFDVNEGFESNTSLITANWRMARAIVDYVIQNKANQATA*
Aquilegia_coerulea|Aqcoe3G429200.1.p		MRAQVWSELEVDLPADDIWAVYSSPDLPRLIVELMPARFQRIDVLEGDGTQGTILHITLQPANSGPLVWNEQFTTIDHVNRIKVVRQIEGGFLDIGFSLYENIFTITERGPHACTIRATANFDVNEGSESSTNLITANWRMARVIVEYVLQNKANKTATA*
Aquilegia_coerulea|Aqcoe3G218400.1.p		MRMEAVLFVFLMFLGTINCQKFILTGRPLLHHQGILNEVSTVTKRLANELKVAASADEVWSVESSNEIPKHLKDLLPDTFEKVEIIGDGGLGTTIDMTFPPGWFPHQYKEKFVLIDDKLRIKKVQLIEGGYLNLGVTYYMDTIQVVPTGPDSCVIKSSTEYHVKPEFLKIVEPLITTGPVDAMADVIAKIALERKYKSHSNIKMVTI*
Aquilegia_coerulea|Aqcoe3G232700.1.p		MVGKIEHELEVTVPASEVWKIYGGLELADLICKLLPDIFENVEVVEGDGGVGTILKIVYGKGTPMVTYQKQKFTVVDNEKRFIVAEVFEGGLLDHGFSLYRFMFQIIEKDANSSIIKSSIEYEVKPGSEANEAFSSVKGLEVMAEAVAKHLKEKN*
Aquilegia_coerulea|Aqcoe3G428300.1.p		MRAQVWSELEVSLSADDIWAVYSSPDLPRLIVELIPGFFQSIDVLQGDGTQGTILGITLLPTNSGPLVWKEQFTTIDHTNRIKVVRQIEGGFLDIGFTLCENIFTITSRGPNACTIRTTISFDVNEGFESNTSFITANWTMARAIVDYVVKNKANQATA*
Aquilegia_coerulea|Aqcoe3G108900.1.p		MSLSLLASSTLSSASFRNPLHSKAKTPSIIHVGNRRIAYTCCEQKQNKQGDKKNHIIDRRNVLLGIGGLYGASATTMGNNKALMAIGAHLSPHDHSKHQLATQSVPYDEKKLHAEVWSELVVELPADEIWAVYSSHDLPRLIVELLPQRFDKIDIVEGDGGVGTIMYCVLNPANSGPQTWKEKIIKMDDKTRTKVVRQIEGGYLGIGFHMYEHIFTITPKDANSCIIRMTASFDVDDNSASNASLISANWSMGKAIANYVFQNKANKHNNAHGN*
Aquilegia_coerulea|Aqcoe3G108900.2.p		MGNNKALMAIGAHLSPHDHSKHQLATQSVPYDEKKLHAEVWSELVVELPADEIWAVYSSHDLPRLIVELLPQRFDKIDIVEGDGGVGTIMYCVLNPANSGPQTWKEKIIKMDDKTRTKVVRQIEGGYLGIGFHMYEHIFTITPKDANSCIIRMTASFDVDDNSASNASLISANWSMGKAIANYVFQNKANKHNNAHGN*
Aquilegia_coerulea|Aqcoe3G218100.1.p		MVGKVEHELEVNVPASELWEIYGSLELANLVTKLLPDVFKSVEVVEGDGGVGTVLKVVFPEGTSLVTYFKEKIIVIDNEKRLKVTELIEGGFLNLGFSLYRVSLQIIEKDSNLSSIIKSSIEYEVEPGSEGNASFISVQPLQLAAEAIGKYLTEKV*
Coptis_chinensis|Cch00026124-PA		MWNEVLFVLLMFLGTMNCNNLVVSGRPLLHGITNKESTVSKVLEHELKVAASADEVWSVYGSPELPMHLLEMLPGSFEKVKITGDGGVGTIIDLTFPPGEFPHAYKEKFVFIDHKLRILKVQIIDGDYANLGVTYYMDTIIVVETGPDSCVIKSSMEYYVKPEFANIVEPLIDTVSVASMAEAVAKKVLEEKHKSSEENPSITTPFGPTQERGQN*
Coptis_chinensis|Cch00022473-PA		MRGHVQSEYEAAASADEIWAVYSSPDLPRLIVELMPARYERIDVLKGDGTVGTVIRNFLNPGDMDFYFLTFHLGIYHTTILMHNLFMQPCFLSIVTSDNLIYILISANSGPLTWNEKFIKIDDKTRTKVVQHIEGGYLDMGFSFYENIFTIIKTGKDSCLITARTVFDVAEEYESNTSLISVSWAMARAISNYVIQNRANKDEKQTKSFLRCC*
Coptis_chinensis|Cch00019935-PA		MFAEVWSELEVDLPADDIWAVYSSPDLPRLIMTLLPTRYESIGVLEGDGTQGTVLDIVLQPANRGPLTWHEKFTKIDHKHRVKVVAQIVGGYLSDTYGFNSYANIFTVTPKGHHACVIRTTASFDVKEGFESNTSFITAGWGMARAVANYVRENRAKKSSA*
Coptis_chinensis|Cch00019936-PA		MLAEVWSELEVDLPADEIWAVYSSPDLPRLIMTLLPTRYETITVLEGNGTQGTVLDIVLQPANRGPLTWHEKFTKIDHKHRVKVVTQIVGGYLADTYGFNSYANIFTVTPKGRHSCVIRTTASFDVKEGSEANTSFITAGNRGPRTWHEKFTKIDNKQRVKVVAQLVGGYLDDAYGFNSYAETFTITPKGCNSCVIRQASSFDVKEGSEANASFITADWSMARAVEKYVKACRATATAKA*
Coptis_chinensis|Cch00008547-PA		MEGQLEHELEVSVPASEVWDVYGGLKLGKLVCELLPNVIEKVELVEGDGGVGTILKVVFPQGTPGFTFYKEMFTKVDNEKRLKEAEVVEGGYLELGFSLYRVRFEIIEKDAKSSIIKTTIEYEVDTAANASIVSSKALELIAETIAKYLTENQV*
Coptis_chinensis|Cch00008493-PA		MEGKLESKLEVNVPAREIWDIYGGLKLGQLGSKLVPDHFERVEVIEGDGGVGTVLRVIFPPGTPNLTSHIEKFTVVDSEKRIKVAEVIKGGYLDLGFSLYRVRFEIIEKDANSSIIKTTIEYKVDNAARASLVSTASLDLVAEAIAKYLTEKKV*
Coptis_chinensis|Cch00008491-PA		MEGQLEHELEVSVPASEVWDVYGGLKLGKLVCELLPNVIEKVELVEGDGGVGTILKVVFPQGTPGFTFYKEMFTKVDNEKRLKEAEVVEGGYLEFDFSLYRVRFEIIEKDAKSSIIKTTIEYEVDTAANASIVSSKALELIAETIAKYLTEKQV*
Coptis_chinensis|Cch00005910-PA		MIHSSSLNLVPFFNLNTKYHYNKAKNFNHIFNSLEAEHTITTKSDQLFQKQAITNFISFGRRHLIGASAALLLPTFHSKASHLQSAHKGKGLLGEVSGEVEVDLPADEIWAVYSSPDLPRLIVELMPARFASIDILEGDGTQGTVLHCVLQPGNKGPVTWNEKITKIDHKSRTKVVRQIKGGYLDMGFNMYEHIFKITKTGHNSCTIRMTASFNVNEGSESNASLITANWNMAKAISNYVIQSKASKPAGIKDSVGTTVYP*
Coptis_chinensis|Cch00008332-PA		MRMEVVLVVFLMFIGTINCERLIFNGRPLLHRVTNEETVMLYHELEVAASADEVWSVEGSPELGLHLPDLLPAGIFAKFEITGDGGEGSILDMTFPPGQFPHHYREKFVFFDHKNRYKLVEMIDGDFFDLGVTYYMDTIRVVATGPDSCVIKSSTEYHVKPEFAKIVKPLIDTVPLAIMSEAIAKVVLEHKHKSSE*
Coptis_chinensis|Cch00015085-PA		MEGQLEHELEVSVPASEVWDVYGGLKLGKLVCELLPNVIEKVELVEGDGGVGTILKVVFPQGTPGFTFYKEMFTKVDNEKRLKEAEVVEGGYLEFGFSLYRVRFEIIEKDAKSSIIKTTIEYEVDTATNASIVSSKALELIAETIAKYLTEKQV*
Coptis_chinensis|Cch00015082-PA		MEGKLESKLEVNVPAREIWDIYGGLKLGQLGSKLVPDHFERVEVIEGDGGVGTVLRVIFPPGTPNLTSHIEKFTVVDNEKRIKVAEVIKGGYLDLGFSLYRVRFEIIEKDANSSIIKTTIEYKVDNAAHASLVSTTSLDLVAEAIAKYLTEKKV*
Kingdonia_uniflora|KingUnif40896.1		MHGEVFTVLDVSASADDVWAVFRSPELPNILLQVLPMLFEKIIPVSGDGGAGTVVHIVLTPGMPEPRSWNEQFVTIDDKKKTKVIRMIEGGYLDLGFTKYEIIFNVIEKDANLCTIKATTAFEADEEKFTANATRVTPAATWAFSKGIATYVLQKKVDTDGC*
Kingdonia_uniflora|KingUnif07307.1		MRGYVSSELTVGAPAADVWAVYSSPELPKLIVRLTDVFKKIDILEGDGHVGTVLHITLAGSDEPLTWNEKFMTIDHEKRLKVVQQIKGGYLDLGFTLYQDIFKIIDKGPNSCIIKSSSKFEVDDKFEANAALIDADSNQGMAKAIAKFVLQSKSKKHEDHFAHSPRKYGA*
Kingdonia_uniflora|KingUnif15076.1		MRKELVNELEVTAPADDVWAIYSSPTLPELILKLLPDEFESIVKDGDGSVGTVLHLTFPKGSIPLSYKEKFVTIDHHKRLKEVRQIEGGYLELGCSFYMDSFHIIVKDCDSCIIKSTTTYEVEDEKANQVESLISIDSLASMAQVLSKYVLENKESNAGHHHKGHGHGHNDHC*
Kingdonia_uniflora|KingUnif12955.1		MILNCTHNQVPTIKYGRKNDVVQLYDYAASCRPRLRFSMYSQYCSNTIRGTEKKKKTISIKRNKMRKELVNELVVAAPADDVWAVYNSPTFPELIDKLLPDDFESIVKDGDGAVGTVLHLTFPEGSVPLSYKKKVVTIDHHKRLKEVRLIEGGYLELGCSFYMDSFHIIEKDCDSCIKSTTTYEIEDETANQVESLISIDPLARMAKVLSKYVLENKESNAGHHH*
Kingdonia_uniflora|KingUnif43146.1		MQGSLSHELEVGVPASVVWDLYKGLGIGKLVSELAPHVIEKVEVVEGDGGLGTVLKLTFPAGTPMLTFYKEKFTIVDHEKRIKETEVIEGGFLDLGFSLYRVTFEIIEKDTDSSIIKSIVEYQVKQEFASNASVVSIGPVGAVSEMAAKYLLEKKSSASN*
Kingdonia_uniflora|KingUnif07397.1		MVVCSNSGHVPTKKMRGEVSTYLVVNASAKDVWAVFRSPDLPRIVPNLIPGVFKEIKILKGDGGVGSVLRNVLAKGIPGPRSWEEKIVMIDNVKRMKRIRMTKGGFLDLGFRSYENFFKIIEKGTKSCMIKSAVIFKADEDKFESNAFRIRVDATWGFSKAIAFYVVQKNKK*
Kingdonia_uniflora|KingUnif19038.1		MRGSVSTDMSVQASAKDIWAVFSSNDLPKMLPDLLPGAFEKIDIIQGDGGVGTKLHVVLAQGIPEPRSWNEKFMVIDDVRRMKRIQVTRGGLLDFGFRSYENVFQIIERGTNSCIIRSTVHFEADEDKFEANASQIKADASWGVGKAIANHVVQKKTIV*
Kingdonia_uniflora|KingUnif11527.1		MRGSVSTDMSVQASAKDIWAVFSSNDLPKMLPDLLPGAFEKIDIIQGDGGVGTKLHVVLAQGIPEPRSWNEKFMMIDDVRRMKRIQVTKGGLLDFGFRSYENVFQIIEKGTNSCIIRSTVHFEADEDKFEANASQIKADASWGVGKAIANHVVQKKTTV*
Macleaya_cordata|mrna.BVC80_1653g93		MKYEFINELQVDASADDVWAIFGSPNLSKVFLELLPSMVESKCILEGDGGLGTVFRVVYRPGYVPHTYKEKIVTIDHDKRLKEVQQIEGGHLEMGFTSYMKSGQILEIKDCNNSCIIRSITKYEIKDDLEVMNNNVSSLITGLDTLVAFARAIPKYIQEQKKNSASVANHNK*
Macleaya_cordata|mrna.BVC80_9095g62		MRKELTNEMEVAASADKIWAVYSSPNLPKLIVELLPTVFDRIDIIEGDGGVGTVLYILSPPGSVPLSYKEKFVTIDNEKRLKEVQQIEGGYLDMGVTYYMDSFHILEKGPDSCIIKSTTTYEIKDELADKVSSLITIDSLVGMAKAISKYVLDQKKSRFRSFCVII*
Macleaya_cordata|mrna.BVC80_9095g91		MKGQLSKEIEVTVPATDIWEVYGSLELGKLIPKLMPDILRDVEVVEGDGGVGTVLKLTLPPGIPGLSYYKEKFTKVDNEKRHKETEVVEGGYLELGFTLYRITLQIIEKDSESSIIKSTIDYEVNDDSADNAAFVSTKPLETIAQVIGKYLMEKKAV*
Macleaya_cordata|mrna.BVC80_9095g98		MRYELINKFDVAAPADAIWAVYSSPTLPKLVVELLPGVFDRIEIVQGDGRLGTVLHLVYPPGSVPLSYKEKFVTIDHHRRLKEVQQIEGGYLEMGCTFYMDSFEILEKDCDSCTIKSVTKYEVNDERAPDVSPLISVDSLVTMARAISKYVLDKKKTGSSYDDDDCDDEDNPMKHAHGHGHGFWHRHDGHGHGHDGFGHGGHGHDEHGHGDDGYGHGDC*
Macleaya_cordata|mrna.BVC80_9095g100		MRGKVTNEIDVVGASADEIWAVYSSPELPTKIVFEITPGVIKKLDLLEGDGGAGSVLDVELAEVFPEPRSWKEKFMKIDHETRTKVIRHTEGGYLNIGFNLYEETFEIIEKDANSCIIRATLDVDIDEDEKFQQNASRITVDAFSGLGKAVSSYVIRNKSKN*
Macleaya_cordata|mrna.BVC80_9095g101		MRYELINEFDVAGASANDIWAVYSSPDLPRLIVELLPSVFQRIDVVEGDGRLGTVLHVVYPAGSVPLEYKEKFVTINNHKRLKEVLQIEGGYLEMGCTFYMDRFEILEKGCDSCIIKSITKYEIKDELADKVSPLISVDSLVPMARAISKYVLDKKKTANANSPKKHGHGHILGIF*
Macleaya_cordata|mrna.BVC80_9095g102		MRYELINEFDVAGASADDIWAVYSSPDLPKLVVQLLPTVFERIDVVEGDGGLGTILHLVYPPGSKPLTYKEKFVTIDNRKRPKEVLQIEGGYLEMGCTFYMDSFHILEKGCDSCTIKSITKYEVSDELAAEVSPFISIESLVPMARAISKYVLDQKKTGTTPTNGCNNNDGPKKHGHGHGHGNGGDHC*
Macleaya_cordata|mrna.BVC80_9095g104		MRGHVTNEMDVVGASADEIWAVYGSHDLPRLIIDLQPGVFDKIDILEGDGGAGTVLHIVMAEGIPGPREWKEKFVTMDNHKRVKVIQQIEGGYLDIGFSLYQDTFEILKKGRNSCIIRSTVTIDLDDKFESNASLVTVDALWGMAKSIVKYVLDNKPKSLCDDEDNDKPTSGHHHHHHHHDGGHGHEAHDD*
Macleaya_cordata|mrna.BVC80_9095g105		MRKELTHEMEVPTSADSIWAVYSSPDIPRLLKEVLLPGVFEKLDVIAGDGGVGTVLDIAFPPGAVPRSYKEKFVKINHEKRLKEVEMIEGGYLDMGCTFYMDKIHVLEKGPNSCVIESAIIYEVKDEYAEVVAPLITTEPLASMAEWTVVIGDRGDLIGIKIAYFAVVIEIATNEWSV*
Macleaya_cordata|mrna.BVC80_969g32		MSGTSAANGRNKTIRYELINEFEVVGASAKEIWAVYSSHNLPKLIVQLLPGMFERIDIVEGDGGLGTVLRLVYPPGSVPLTYKEKFVTIDNPKRLKEVLQIEGGYLDMGVTFYMDSFQIFSKGRNSCIIRSISKYEVKDESAAKVSPLISVDSLLTMARAISKYVLDQKKSVGTMDF*
Menispermum_dauricum|Mdau20G000369.t1		MIKKELKIELEVAASAEDIWEVYSSPDLPNLIVKLLPSVFEKIEILEGDGGVDTILRITFPPGSVPLTYKEKFVTINDRKRLKEVKQIEGGYLDMGCTFYMDSFHILQNGPKSCVIVSKTEYEVPNKEIASKVEPYISIDSLANMATAISNYVLNRARKELKHELEVAVCAEDVWEVYSSPDLPNLIVKLLPSVFEKIEIVEGDGGVGTVLKNTFPPGSVPLTYKEKFVTINDRKRLKEVKQIEGGYLDMGCTFYMDSFHILEEGRNSCVIVSKTTYEVPNKKIASEVEPYISIDSLANMATAISNYVLKKKKLARLWVAIKFCSNSTQSLLDPHYNIVGVRLIPLLICSLAKLFSDSSRVLTFDRAERFRRLVRASSMASSPRPSKRPRKNQAEENST…
Menispermum_dauricum|Mdau20G000483.t1		MKLLPGEFDKIETLEGDGGVGTIVQVTFPPGSVPLTYKEKYVTLDDHKRLLEVEQIEGGYLDMGCKFYMDIFHIIKKGPNSCVIVSKIKYEVPEELASQVEPYISIDLLASIAEAISNYVLYRVRKELKHELELAVCAEDVWEVYSSPNFPNLIVKLLPSVFEKIEILEGYGGDGTVLKITFAPGTGSMLSSGFLTYLIVCQC
Menispermum_dauricum|Mdau20G000838.t1		MRGEVSIELAICAPAKDVWATISSHKTPSLIFRLLPNMFQKLEIVKGDGGPGSVLHIVLSQGEPREWIEEFVKIDDEKREKRVRMIEGGFLDLGFSFYEVVFDIVEKDECSCTYKSAIVFEADDDAFPAAASLVSAASAWEIPRAIADYVVQNKATHNMG
Menispermum_dauricum|Mdau20G000841.t1		MMIKKELKSELEVAASADDVWAVYGLPATDFFNLIMKLLPGEFDKIETLEGDGGVGTIVQVTFPPGSVPLTYKEKYVTLDAHKRLLEVEQIEGGYLDMGCKFYMDIFHIIKKGPNSCVIVSKIKYEVPEELASQVEPYISIDLLASIAEAISNYVLYRVRKELKHELELAVCAEDVWEVYSSPNFPNLIVKLLPSVFEKIEILEGYGGDGTVLKITFALGSVPLTYNEKFVTINDKKRLKEVKQIEGGYLDMGCTFYMNTFHILEKGRDSCIILSKTKYEVPNKEVASEVEPYISIDSLANMATAISNYVLKKKKRARLFFCC
Menispermum_dauricum|Mdau20G000842.t1		MMKELKHESEVPASADDIWEVYSSPDLPKLILKLLPGVFERIKILEGDGGVGSILRVTFPPGSVPLTYKEKFVTINNRRRLKEVKQIEGGYLDMGCTFFRSSVHILPKGLNSCVIVSKIEYEVPNNEIARQVKPYISIGSLVNLATAITNYVLNGGRRN
Menispermum_dauricum|Mdau21G000617.t1		MKGQVSHELDVGVPASAIWQIYRGLELGKLAYQLLPEVIQMVEVVEGDGGVGTVLKVTFPPVPGLGFSYMKEKFTRVDDEHRIKDTVVVEGGYLNFGFTFYLVRFEIVEKDAESSIIRSIIEYEVGDESAEKASLVSTKPLEAIGEAIAKHLTDNKPTV
Menispermum_dauricum|Mdau21G000618.t1		MRKELKHELKVAASADDIWEVYSSPDLPTLIVQLLPDVFDSIEVVEGDGGVGTVLHITFPPGSVPLAYKERFVTMDDQKRLKEVKQIEGGYLEMGCTFYMDSFHILEKSHNSCVIVSKTEYEVPNEEIESQVEPYISIDSLANMATAISNYVLEKKKPKSSESSSDDEEDGKSDDECSSDDSERSNSVKEHKSESSDEEDDRFDDQGSSLHEPESFNNDLEKKESESESTCDNEENDKPDDDCSPDGSESSHGSEGSNGSGSSDED
Menispermum_dauricum|Mdau21G000619.t1		MIKKDLKHELEVATSADEIWEVYSSPDLPNLIVKLLPSVFEKIEILEGDGGVGTVLRLTFPPGSVPLTYKEKFVTINDWKRLKEVKQIERGYLDMGCTFYMDSFHILRKGPKSCVIVSKTEYKVPNKEIASKVEPYISIDSLANMATAISTYVLNRVRKELRHELEVAVCAEDVWEVYSSPDLPKLILKLLPGVFENIEIVEGDGGVGTVLKLTFPPGSVPLTYKEKFVTISDRKCLKEVKQIEGGYLDMGCTFYMDSFHILEKCRDSCVIVSKTKYECPNKKIASEVEPYISIDSLANMAMAISKELEIAIGALSDASLCPPPARKDDLRRFEA
Menispermum_dauricum|Mdau21G000622.t1		MTIKKELKHELEVAASADDIWEVYSSPDLPNLTVKLLPSVFEKIETLEGDGGVGTVLRLTFPPGSVPLTYKEKFVTINDWKRLKEVKKIEGGYLDMGCTFYMDSFHILRKGPKSCVIVSKTEYEVPNEEIASKVEPYISIDSLANMATAISNYVLNRVRKELRHELEVAVSAEDVWEVYSSPGLPKFLLKLLPGVFESIEIVEGDGGVGTVLKITFPPGTVPLTYKEKFVTINDKKRLKEVKLIEGGYLDMGCTFYLDTIHILEKGRDSCVIASKINYEVPNKKIASEVEPYISIDSLASMATAISKWPWTITRRQFANNLHALARAVSPTVLCIDAFVGVCAGCIVFSQQFHAWSHGTKSRLPALQEPGVLVSRADHAAHHRAPYNNNYCIVSGAWNQ…
Menispermum_dauricum|Mdau21G000624.t1	MdaNCS6	MTIKKELKHELEVAASADDVWDVFSSPDLPNLIVKLIPGVFEKIEILEGDGGVGTIIRITFLPGSVPHTYKEKFVTINDWKRLKEVKLIEGGYLDMGCTFFMESFHILRKGPKSCVIVSKTEYEVPNEEIEGKVEPYISIDSLVSMATAISNYVLNRVRKELRHELEVPVCAEDVWEVYSSPGLPKFLLKLLPGVFESIEIVEGDGGVGTVLKITFPPGTVPLTYKEKFVTINDKKRLKEVKLIEGGYLDMGCTFYLDTIHILEKGRDSCVIASKINYEVPNKKIASEVEPYISIDSLASMATAISKYVLKKKKLARLCFCC
Menispermum_dauricum|Mdau21G000627.t1		MLVGEQNLHDFVHASPEKKKWGGDVDGVLLLCFRCRLLPPFQITFAGKEEKGQESLLLARVFKGSSTRSATAGLERAMKDAFSDLTLKDTLKPVLIPCYDLSSSALFLFSRGCTLAALSSQLSTVLPTVLIDSVQLRDHKVKKKKELKHELEVAASADDIWEIYSSPDLPNLIDKLLPSVFGKNEILEGDGGVGTILRLTFPPGSTNA
Menispermum_dauricum|Mdau21G000628.t1		MTIKKELKHELEVAASADDIWEVFSSPDLPNLIVKLIPGVFEKIEILEGDGGVGTIIRITFLPGTVPHTYKEKFVTINDWKRLKEVKLIEGGYLDMGCTFYMDSFHVLRKGPKSCVIVSKIEYEVPNEEIASKVETYISIDSLASMATAISNYVLNRARKELRHELEVPVCAEDVWEVYSSPDLPKLILKLLPGVFENIEIVEGDGGVGTVSKLTFPPGSVPLTYKEKFVTFNDGKRFKEVKQIEGGYLDMGCTFYMNSFHILEKCRDSCVIVSKTKYECLNKKIASEVEPYISIDSLANMAMAISKYVLKKKKLARLCFCC
Menispermum_dauricum|Mdau21G000632.t1		MATAISNYVLNRVRKELRHELDVAVCAEDVWEVYSSPDLPKLIMKLLPGVFENIEVVEGDGGVGTVLKLTFPPGSVPLIYKEKLVTISDRKCLKEVKQIEGGYLDMDSFHSLEKCRDSCVVVSKTKYECPNKKIASEVEPYISIDSLANMAMAISKYVLKKKKLARLVLLLDFLKLTWAYCERALVSSVDLKC
Menispermum_dauricum|Mdau21G000633.t1		MIRKELKHELNVAASADEIWEVYSSPDLPSLIVKLLPSVFEKIEILEGDGGVGTILRITFPPGSVPLTYKEKFVTINDWKRLKEVKQIEGGYLDMGCTFYMDSFHILRKCHKSCVIVSKTEYEVPNEEIANKVEPYISIDSLANMATAISNYVLNRVRKELRHELEVAVCAEDVWEVYSSPDLPKLILKLLPGVFENIEIVEGDGGVGTVLKVTFPPGSVPLTYKEKFVTISDRKCLKEVKQIEGGYLDMGCTFYMDSFHILEKCRNSCVIVSKTKYECPNKKIASEVEPYISIDSLANMAMAISKVSAPYKEKFVTINDWKRLKEVKQIEGGYLDMG
Menispermum_dauricum|Mdau21G000634.t1		MKKELKDDMDVAASANDIWAVYSSPDLPKLIVQLLPTVFDKIDIVEGNGGVGTVLHVTYPQGSVPLTYKEKFVTIDDEKRLKEVKQIEGGYLEMGCTFYMESFHIIEKGHNSCVIVSKTEYEVPNEEIESQVGPYISIDSLRKMATAISDYVLNRATRKEVKHELEVAASADDVWEGYRSPDVGSLICPHVFEKIELVEGDGGVGTVLQITHPPGYVPHTYKEKYVTLDDHKRLLEVEQIEGGYLDMGCTFYMDSIHVVKKGDNSCMIVSKAKYEVPKELASQVEPYIAADAVANMARIISNNVLEKKKS
Menispermum_dauricum|Mdau21G000635.t1		MRGHVTNELDVALPADEVWAIYRSPDLPRLVVQLQPGVFEKLDVVEGDGGVGTVLHIVLALGANGPRDWKERFVEIDDQTRTKVVQQISGGFLDLGFHLYQNIFKVIERDATCCTIQSYTKFEVGEEFESNASLISADSMWGMAKAIANYALNIAENHSEN
Papaver_somniferum|PS0100840.1		MEKVIRYDLEVPTSADSIWAVYGSPDIPRLLRDVLLPDVFEKLDVIEGDGGVGTVLQVVFHPGAVPRSYKERFETVDHEKRLMEVSIIEGGYLDMGCTFYLNRIHVLEKTSKSCVIKSSIVYRVEEECADVMSKLITTIQLESMAEVVSNYVLKKQSASHTNIPKKQSLVRKEITYEMEVPTSADSVWHVYSSPDIPRLLRDVLLPGVFEKLHVIEGNGGVGTVLDIAFPLVMTLGLNKQCDDNRGCSAAKLQGEIREHQPGEETKRSSYD
Papaver_somniferum|PS0137820.1		MKYSLVFIILSFFLINQFSSANKGLVLASSVVHANKLAPALYVFGDSVVDSGNNNYLNTLAKGNYKPYGIGFPNGASGRFTNGYTIVDYLAAWLGLPFVPPYLGLSKVQKSKITTGINYASGAAGILPESGTATGDNLSLEKQVNYFKDTVQFDLPKSLKTRKNISTYLAKSIVVVVIGSNDYLNNYLQPTRYNSSKIYTPQQYGAHLVSTLKQHLKNMYHIGARKFLVFEMGPIGCLPSVVNSVNPRPITACVEGINGLVKIFNFGVTNMIQELRSTLKGSTFVYGDVFENTYHQAITPLKYGFSGGNAPCCSVSNMSSLCIPNQTPCKNKNAYHYWDGFHPTQRVNHEIANGCFRGSSTCFPINVYQLACNLRITSGCRPKIIPSSYEKVEVLEGDG…
Papaver_somniferum|PS0146720.1		MRGHVTNEMDVVGASADEIWAVYGSKDLPKLIITLAPGVFEKIDYIEGDGGQGTILHIVMAQGIPEPREWREKFVTVDHCRRVKQLQQIQGGYLDMGFSLYKVTYEILPKDKNSCIIKSTVQIDLDDKNFEANARLITVDAMWGMAKSIVQYVLDNKAKQQSITLHVGHGKVDEIWAVYGSKDLPKLIITLQPGVFEKIDYVEGDGGQGTILHIVMAQGIPGPHEWREKFVTIDNRRRVKQLQQIQNGYLDLGFSLYKVTYEILPKDKNSCIFRSTVQIDLDDKNFEANARLITVDSMWGMAKSIVKYVLDNKAKQ
Papaver_somniferum|PS0146770.1		MRKEIVFVLFLVFLMGKESSAMRYKLINEIDVDLSARSIWNVYSSKDLPSLIVKLLPEVFERIDILEGNGGVGTVCRIVFPPGSVPRTYKEMFTKIDHVHRLKVMQQVSGGYLAMGVTSYTDMFKIISTGPNSCIIRSTTEYEVPDHLADKVNTLISIEGLVPM
Papaver_somniferum|PS0146780.1		MRKEIVFVLFLVFLMGKESSAMRYKLINEIDVDLSARSIWNVYSSKDLPSLIVKLLPEVFERIDILEGNGGVGTVCRIVFPPGSVPRTYKEMFTKIDHVHRLKVIQQVSGGYLAMGVTSYTDMFKIISTGPNSCIIRSTTEYEVPDHLADKVNTLISIEGLVPMAHAIIKYVKEFGDQVNIDDSANIALPVGNDA
Papaver_somniferum|PS0146870.1		MMKPAIFMVIFALFLMGKGADSMRYELNNEIDVPLSASSIWGVYACKELPKLIVKLLPHVFDRIDYISGDGGVGTVIRIIFPPGEVPRSYKETFRKIDHAQRLKEVQQLSGGYLAMGVTSYVDKFKIISTGPNSCTIRSTTEYEVPDHLADKVNSLISIEGLVPMAKAIVEYVKEFGDYGQCLGTSANADLAHIALPV
Papaver_somniferum|PS0146890.1		MGIGDAGRYELINQIDVPLSASYIWDVYSSSDLPKLIVKLLPKVFDRIDYISGNGSVGTIVSVVLTPGSTPQMYKEIYRTIDHVRLVKEVQQISGGYLAMGVTYYMDKVEVIPTDPYSCIIRSTTEYEVPYHLAYKVNSLIIKGLVPVAKAIAKYVLEFGDIHRGVQSEDGVVAADDGRCSDIGRNMLIRGGHAVDAAVATCLCLGVVYPMSSGIGGGAFMVVLNSSNSKAQAFNSRETAPKLASKDMYEKNITWKSKGASSMGVPGEIAGLHVAWSIYGKLNWSDLFQPAIKLARDGFVVSHFLGLGINKSREMIESDSNGLRRVFMPNGRLLQAGDTSYNRKLADTLETLAKEGPSAFYNGDLGKNFVKDVQAAQGIVTEEDLRNYVVNITDVVTTN…
Papaver_somniferum|PS0146900.1		MMKPAIFVVFLVFFLMGKEADSMRYELNNEIDVPLSASSIWQVYACKDLPKLIVKLLPDVFDRIDYIKGDGGQGTIVRIVFPPGSVPRSYKEQFITIDHVHRLKEVKQYSGGYLAMGVISYIDKFKIISRGPNSCTIRSTTEYEVPDHLADKVKDLISIEGLVPMAKAIVDYVKEYGDYGQCLGENDLAHIALPV
Papaver_somniferum|PS0146920.1		MMKPAIFVVVFVFIFMGKGADSMRYELNNEIDVPLSASSIWGVYACKELPKLIVKLLPEVFDRIDYIEGNGGVGTVIRIVFPPGEVPRSYKEMFRKIDHVHRVKEVEQISGGYLAMGVTSYVDKFKIIRTGPNSCTIRSTTEYEVPDHLADKVKNLISIEGLVPMAKAIVEYVKEFGDYGQCLGNNLAHIALPEGN
Papaver_somniferum|PS0149450.1		MVKYKLISEIDVAASADFLWPLLSSKEIPKLAKKLLPNKYEKVEVLEGDGGLGTVVYVVHPPGSVPLSYVQKIVTVDNCERFQEIPQIEGGYLDMGVTLFIESFQVIEKEGDSSVVKSMFFSFVFTLLISFFLLIRTQEFASTEALKLPLEDNVRAPALYVFGDSLVDSGNNNYLQTLAKVNYTPYGVDFRNGPTGRFNNGKTVVDFIASWLGLPYVPAYLGLSEKQKRNTKTGINYASGAAGILKESGTVTIGDNLSLEEQVNYFTKTVKIDLPKIFKTRQKISQYLSKSIFVISIGSNDYINNYLQPALYNSSKIYNPQQYADHLVSNLKKHLMSIYKSGARKFVVFELGPVGCTPAFVFSATPKPTTPCVESMNSVVKIFNSGVTKMTKELTATLK…
Papaver_somniferum|PS1019370.1		MKSQIVFSIFLFFSSICIAESLNYTLISEFEVAAPADDVWALISSKDAHKTFQMLLPGMFEKLEILEGDGGVGTVLLVVFPPGTVPLSNEGKYVTIDNRRRVREILQVKGGYLDMGVTYFMETFEIIPKGCNCVFKSMIRYEVPDELAPDVSSIISVEGILIMAKAAAKYVVDNSKKTPKYSY
Papaver_somniferum|PS1121940.1		MKNQVVLFICLLFLVHTGESLKYTLIGELEVAASANDVWAFFASNDAPRMFVQLLPGVFDRIEILEGNGGVGSVLRVVYPAGSVPLTNLEKFVTIDNRRRLKEILQTEGGYLDLGVTYFMESFQIIRRGANSCTIKSMINYEVPDDLAANVSPLISIEGLINMAKVAAKYIIDNKNKASSVADM
Papaver_somniferum|PS1123540.1		MKYQAGLSIFLLFLIGTGESSKYTLVNDFNVAASADEVWAVYSSHNLPKLIVKLLPGMFKRIDVLKGDGGVGTILRLVYPPGSVPLTYKEKFVTIDNRRRLKEVLQIEGGYLKMGVTFYMDSFQVIKRGRDSCIIRSITKYEIRDDLAVKVSPLISVDSLVTMARAISKYVLENKKKANSTIVP
Papaver_somniferum|PS0218150.1		MVKYMLSSELEVAAPAEFVWAVFSSKEVPKLVPKLLPSAFEKVKILEGDGGLGTVIDLVYPQGHVPLSYKEKIVTVNNQERLKETQQIEGGYLDMGVTFLIESFQMIEKDADSCIIKSTVRYEVPDDLAHNVSHLISADHLLTMAKVGAKYALSLRQ
Papaver_somniferum|PS0219880.1		MRYEFMNEIEVDASADEVWAIYSDPNFCKLVVQILSGILESKDVVEGDGRNVRSILRVVFLPGHVPGMYKEKFVTIDNEKRLKEIQMIEGGYLEMRFTFCMLSFEILAKESNLCVIKTVTKYEISDELATGVTAHLNNSLDTLVTLARGVSGHISQQKTGSIAN
Papaver_somniferum|PS0227610.1		MRYEFVNEIEVDASADEVWAIYSSPTFCKLVVQILSGILESKDVVEGDGRNVGSILRVVFLPGHVPRMYKEKFVTIDNKKRLKEIQMIEGGYLEMGFTSCMLSFEILVKESNLCVIKTVTKYEISDEVATGVTAHLNNSLVHGSVWLEGFADISHSRKQAV
Papaver_somniferum|PS0301050.1		MKGQLSKKVEAPVPASDLWDVYGTLELVRLIKELLPEILHDVGVDVGDGGVGTVLKITLAPGSPVAYYKEKFIEVDQEKRIKVVDVVEGGYLEAGFSLYRTTFEIIEKGDHSSVISTIDYELDDASADNAALVSIKPLEIVAETLVKYLKEKKIDHANV
Papaver_somniferum|PS0337110.1		MRGHVTNEMDVVGASADEIWAVYGSKDLPKLIITLQPGVFERIDIIEGDGGAGTVLHIVMAEGISGPHEWNEKFITLDNHTRVKQIQQIKGGYLDMGFSLHQVTYEIIEKDENSCIIRSTVKIELDDEFESNASSITVDSMWGMAKSIVKYVLDSKAEK
Papaver_somniferum|PS0523020.1		FLFVMGKGNSMRYELTNEMEVAASAEDIWAVYSSPNLPKLIVELLPDVFERIDYVKGTGGVGTIIQVIYSPGIVPRMLKEKFVTIDDHRRLKEVHQIEGGHIAMGVKFHMISFKIIKKGSDSCIIRSKIEYIVPDDFAAKIAPLINVEGLVGMARAITKYVLDNKRN
Papaver_somniferum|PS0541550.1		MRYEFINEFVVDASADDVWAIYSSPNFPALSVQLLPNILKSKFILEGDGCSVGTILCVVPEHASLPMCKEKIVTVDHEKRLKEIHTIEGGYLARGCTFSMLSFEILVKEKSSCVIKTVTKYEINDDLATSASSHLHTYLDGCVTLARGVSKHIAEQNAGAAN
Papaver_somniferum|PS0635090.1		MRYELINEFDVNASADDVWEVYSSPNLPKLIVDLLPGMFERIDYVEGNGGLGTVLRLVYPPGTVPRTYKEKFVTIDKSRRLKEVQQMEGGYLDMGVSFYMDSFEIIEQVGCNSCTIKSTTKYEINDDELAKKVSPLISVDSLVNMARGISKYVLKKQNSRSSHKHDPKKKVHEHGHPSADEDKHVHGRDRSFHR
Papaver_somniferum|PS0635540.1		MRYELINEFDVNASADDVWEVYSSPNLPKLIVDLLPGVFERIDFIEGNGGLGTVLRLVYPPGTVPRTYKEKFVTIDKSKRLKEVQQIEGGYLDMGVTFYMDSFHIIEKVGCDSCTIKSTTKYEINDDELAKKVSPLISVDSLVNMARGISKYVLKNQSHKHQPKKEVHEHGHPSADEGKHVHPGSE
Papaver_somniferum|PS0635590.1		MRYELINEFEVSASVDDVWEVYSSPILPKLIVDLLPGMFERIDFVEENGGLGIVLRLVYPPGTVPRTYKEKFTTIDKNKRLKEVKQIERGYLDMGVSFYMDSFEIIKKVGLIHAQSNRLSNMKSTTMNLRRKFPLLSLLIHLLIWLEASPNMFFRNRIVILAINITLRKKCMKSKILSYHV
Papaver_somniferum|PS0702740.1		MNSTLTSEFYVAAPAEHLWDVIGSKDSYKTIQMLVPGMFEKLEILEGDGGTGTVLAVVFSPGTHFYVNSEEKVTIDNQRRVWEILQIKGGYLDMGVTSFMESFEIIPKGRNSVFKTMIRYEVPDELAHKVSSLITIEGMLTMAKATAKYVVDSSKKSPNYSSIDNADKYEL
Papaver_somniferum|PS0704720.1		MPRRVESGAGIFDRVRVGSAGWVGYVQPYVWGVIGAKDAAQFFMNALPGMFEKIEILEGDGGVGTVLRIIYPEGSVPLTNEEKFVTMDDCKRLKEILQTKEGYLDMGVTYYMETFKIIECGNSSIIQSIVEYKAPEEVAAKVSSLISVEVLALFNKFRVTGYLDGSRVWPPQFTSRNHQNNDIVNRAYTTWQDEDSTIILLLNSLISDVFLPYVAGATSAHEFRTNLSTRFSQASATHTIQLRTQLQSLKLGNGSIQTYLNSIKKIVDALDVADILLLQMRGGYNSAPKGRIAYHSVHRGVYSFSPRPAQQFSSVPPPSSFKNAQPPCQTCKEDGHLAPECTNRLNFSYQGRQPPANCHVPGTVVFFGTRVVYPQSLVLALFNKFRVTGYLDGSRVWPP…
Papaver_somniferum|PS0731680.1		MRGHVTNEMDVVGASADEIWAVYGSKDLPRLIITLQPGVFEKIDIVEGGGGAGTVLHIVMAEGISGPHEWNEKFITLDNHTRVKQIEQIKGGYLDMGFSLHQVTYEIIEKDENSCIIRSTVKIELDDEFDSNASSITVDSMWGMAISIVKYVLDSKAEK
Papaver_somniferum|PS0832840.1		MKYQIVFSVFLLFSSIYSAESLKYTLISDLDVVGASADEIWALFASNDAPQIFQQLLPGVFEKIEVLEGNGGVGSVLRITYPKGSVPLTNKEKFVTIDNRRRLKEVLQTEGGYLDMGVTFFMESFEIIPKNYKSCIIKSMVRYTVPDAVASNVSHLISIEGLLGMAKVAAKYVIDNKKKIAEY
Papaver_somniferum|PS0832860.1		MAESLKYTLTSEFDVAAPADDVWALIASKDSPKTFQMLLPGMFKKLEIIQGDGVVGTVLLVVYPPGSVPLTNEEKFVTVDDHRRLKEILQTKGGYLDMGVTFYMESFQIFPRGYDSCVFKSMVRYEVPDELAPNVSSLISVEGLLTMAKAAAKYVVDNNKTKPNY
Papaver_somniferum|PS0832880.1		MKYQIVFSIFLLSSSIYMAESLKYILISELDVAAPADDVWALIASKDAPKTFEMLLPGMFEKLEIIEGDGGVGTVLLVVYPPGSVPLSNEEKFVTIDNHRRLKEILQTKGGYLDMGVTFYMESFQIFPRGHNSCVFKSMVRYEVPDELAPNVSSLISVEGLLTMAKAAAKYVVDSNKIKSNY
Papaver_somniferum|PS0902930.1		MVSYKLIAELEVAASADDVWGVIGAKDAPQFFMNALPGMFEKIEILEGDGGVGTVLLIVYPEGSVPLTNEEKFVTMDDCERLKEILQTKGGYLDMGVTFYMETFKILECGNSCIIRSIVEYKAPEEVAAKVSSLISVEGLLLMAKIVAKHVVKPEASSIAA
Papaver_somniferum|PS0903360.1		MVNYKLIAELEVAASADDVWEVIGAKNAPEFFKNSLPGVFEKLEVLEGDGGVGTVLLIEYPDGLSNKERFVTVDHHRRLKEILQTEGGYLGMGVTYYMETFKVIECANSCIIQSIVEYKASEEVAAEVSNLISVEGLLNMAKIVAKHVLNKEKAPSTGAA
Papaver_somniferum|PS0935330.1		TGKSSKYTLVNDFNVAASADEVWAVYSSHNLTKLIVKLLPGMFKRIDVLKGDGGVGTILRLVYPPGSVPLTYKEKFVTIDNRRRLKEVLQIEGGYLEMGVTFYMDSFQVIKRGRDSCIVRSITKYEIRDNLAVKVSPLISVDSLVTMARAISKYVLENKKKANSTIFP
Papaver_somniferum|PS0935340.1		MRYELINEFDVGASADDIWAVYSSPDLPRLIVELLPGVFEKIDVVEGNGGLGTVLHLVYPHGSVPLSYKEKFITMDNHKRLKEVRQIEGGYLEMGCTFYMDSFQILKKTHDSCTIRSITKYEVSAELAEKVSSHISVESLVDMARAISKYVIENNEKKKAEDPSTCSGEGHEKKHGHLHRIWISLFGK
Papaver_somniferum|PSUN03620.1		MMKKVIKYDMEVATSADSVWAVYSSPDIPRLLRDVLLPGVFEKLDVIEGNGGVGTVLDIVFPPGAVPRSYKEKFVNIDREKRLKEVIMIEGGYRDMGCTFYLDRIHVVEKTPSSCVIESSIVYEVKEEYADAVSKLITTEPLKSMAEVISNYVIQKESVSPRINILDKQSQVKKEIRYDLEVPTSADSIWSVYSCPDIPRLLRDVLLPGVFEKLDVIEGNGGVGTVLDIVFPPGAVPRSYKEKFVNINHEKRLKEVIMIEEGYLDMGCTSYLDRIHVVEKTSKSCIIKSSVVYEVKRECADAMSKLITTEPLKSMAEVISNYAIKQQSASERNIPKKQSALIRKEINYETEVQTSADSIWNVYSSPDIHRLLRDVLLPGVFEKLDVIAGNGGVGTVLDI…
Papaver_somniferum|PSUN11220.1		MKSDLVFVVFSFLIMVRKGNSMTYELINEMKVNASANDIWAVYSSPDLPKLVNKFLPGAIERIDYVKGNGGVGTILRIVFPPGSVPLSYKEKFITIDSRRLLKEVLHIEGGYLAMGVTFYIERFKIIKKSCNSCIIRSIIEYEVPDKLAANISPLISVDGFVTMATAISKYVLDNKKNGYIPCLAN
Papaver_somniferum|PSUN16250.1		MMKPAIFVVVFVFFLMGKGADSMRYELNNEIDVPLSASSIWGVYACKELPKLIVKLLPEVFDRIDYIEGNGGVGTVIRIVFPPGEVPRSYKEMFRKIDHVHRVKEVQQISGGYLAMGVTSYVDKFKIIRTGPNSCTIRSTTEYEVPDHLADKVNTLISIEGLVPMAKAIVEYVKEFGDYGQCLGGNDLAHIALPVEGN
Papaver_somniferum|PSUN16290.1		MMKPAIFMVFFALFLMGKGADSMRYELNNEIDVPLSASSIWGVYACKELPKLIVKLLPHVFDRIDYISGDGGVGTVIRIIFPPGEVPRSYKETFRKIDHAQRLKEVQQISGGYLAMGVTSYVDKFKIISTGPNSCTIRSTTEYEVPDHLADKVKSLISIEGLVPMAKAIVEYVKEFGDYGQCLGTSANADLAHIALPV
Papaver_somniferum|PSUN16440.1		MRGHVTNEMDVVGASADEIWAVYGSKDLPKLIITLSPGVFEKIDYIEGDGGQGTILHIVMAQGIPEPREWREKFVRIDNCRRVKQLQQIQGGYLDMGFSLYKVTYEILPKDKNSCIIRSTVQIDLDDKNFEANARLITVDAMWGMAKAIVKYVLDNKAKQQ
Papaver_somniferum|PSUN16460.1		MRGHVTNEMDVVGASADEIWAVYGSKDLPKLIITLQPGVFEKIDYVEGDGGQGTILHIVMAQGIPGPHEWREKFVTIDNRRRVKQLQQIQNGYLDLGFSLYKVTYEILPKDKNSCIIRSTVQIDLDDKNFEANARLITVDSMWGMAKSIVKFVLDNKAKQ
Papaver_somniferum|PSUN18630.1		MRYEFINEFDAHASADDVWGGIYGSIDYPKLVVQLLPTVLEKKEILEGDGHNVGTVLHVVYLPGFVPRTYNEKIVTMDHKKRYKEVQMVEGGYLDMGFTYVMVIHEVLAKECNSCIIRSIVKCEVKDEFAANVPNIRNTFDGYVALARAVPKYIAKQHATSAAN
Papaver_somniferum|PSUN18730.1		MRYEFINEFVVDASADDVWAIYSSPNFPALSVQLLPNILKSKFILEGDGCSVGTILCVVPEHASLPMCKEKIVTVDHEKRLKEIHTIEGGYLARGCTFSMLSFEILVKEKSSCVIKTVTKYEINDDLATSASGHLHTYLDGCVTLARGVSKHIAEQNAGAAN
Papaver_somniferum|PSUN53280.1		MKYQIVFSIFLLFSSIYMSESLKYTLISELDVAAPADDVWALIASKDAPKTFEMLLPGMFEKLEIIEGDGGVGTVLLVVYPPGSVPLSNEEKFVTIDNHRRLKEILQTKGGYLDMGVTFYMESFQIFPRGYGSCVFKSMVRYEVPDGLASNVSSLISVEGLLTMAKAAAKYVVDNNKIKSNY
Papaver_somniferum|PSUN53290.1		MAESLKYTLISEFDVAAPADDVWALIASKDAHKTFQMLLPGMFEKLEIIEGDGGVGTVLLVVYPPGSVPLTNEEKFVTVDDRRRLKEILQTKGGYLDMGVTFYMESFQIFPRGYDSCVFKSMVRYEVPDELAPNVSSLISVEGLLTMAKAAAKYVVDNNKTKPNY
Papaver_somniferum|PSUN53310.1		MKYQIVFSIFLLFSSIYCAESLKYTLISELDVLGVSADEIWAVFASNDAPKIFQQLLPGVFEKIEVLEGNGGVGSILRITYPKGSVPLTNKEKFVTIDNRRRLKEVLQTEGGYLDMGVTYFMESFQITPKGYNSCIIKSMVRYEVPDAAASNVSPLISVEGLLGMAGVAAQYVIDNKKKIAEY
Papaver_somniferum|PSUN53320.1		MKSQLCFSIFLLFSSIYSTESLKYTLISELDVVGASADEIWALFASNDAPQIFQQLLPGVFEKIEVLEGNGGVGSVLRITYPKGSIPLTNKEKFVTIDNRRRLKEVLQTEGGYLDMGVTFFMESFEIIPKNYKSCIIKSMVRYTVPDAAASNVSHLISIEGLLGMAKVAAKYVIDNKKKIAEY
Papaver_somniferum|PSUN64910.1		MRKVIKYDMEVAVSADSVWAVYSSPDIPRLLRDVLLPGVFEKLDVIEGNGGVGTVLDIVFPPGAVPRSYKEKFVNIDREKRLKEVIMIEGGYLDMGCTFYLDRIHVVEKTKSSCVIESSIVYDVKEECADAMSKLITTEPLKSMAEVISNYVIQKELFSARNILSKQSVVKKEIRYDLEVPISADSIWSVYSCPDIPRLLRDVLLPGVFEKLDVIEGDGGVGTVLDTVFPPGAVPRSYKEKFVNIDREKRLKEVIMIEGGYLDMGCTFYLDRIHVVEKSLSSCVIESSIVYEVKEEYADAMSKLITTEPLKSMAEVISNYVIQRESFSARNILNKNSLVKKEIRYDLEVPTSADSIWSVYSCPDIPRLLRDVLLPGVFQKLDVIEGNGGVGTVLDIVFP…
Papaver_somniferum|PSUN70600.1		MKNQVVLFICLLFLVHTGESLKYTLIGELEVAASANDVWAFFASNDAPRMFVQLLPGVFDRIEILEGNGGVGSVLRVVYPAGSVPLTNLEKFVTIDNRRRLKEILQTEGGYLDLGVTYFMESFQIIRRGANSCTIKSMINYEVPDDLAANVAPLISIEGLINMAKVAAKYVIDNKNKAASLADM
Stephania_cepharantha|ScepChr8G00204230.1	SceNCS1	MIKKELRHHLEVPVPAEQIWAVYSSPDLAKHLLEQLLPGVFEKVQILEGDGGVGTVLLLKFPPGTVPRCYEEKFVTVDNEKRLKEVVMVKGGYLDMGCTFYMDTIRVIAKGPDSCIIASKVNYEVPNEEIDQKVAPFISTEALEAMANVITNYVINMAKKKVLLEQEVAAHVPAKKKCEFNGSSDLSKFMLELLPRVFRDVEIVERKGGLGTDIRISIPPGLVVPVNISDKCSGWCNRTNLKNWFLYLMSFLSLMLMVFLSSRFIADMF*
Stephania_cepharantha|ScepChr8G00204240.1		MIRKELTHELEVAAPADDIFGVYSSIELDLYLLVQLLPGVFEKHEVLAGEGDVGTIVYVKFVPGIYPNWFKEKFVTVDRKNRLKEVEMVEGGYLDMGCTYYLDSIHVIEKGPESCVISSKVTYEVPNEEMEKKVAPYISTTSLESMANVISKYVLNKRKKSLLNKLQVAASAKDEYWDAYGATPSDSLPKLLLKVLPSVFKDMEIVKSNDGLGAHELRITIPPGLVGSLPVTTKEKFGGWCGPKSLKNGCLYVMCIASLVLMVFLSSRVMAYKY*
Stephania_cepharantha|ScepChr11G00270470.1		MRGHVTNELDVDLPADEIWAIYRSPEFPKLILGMLPPGVLEKLEVVEGDGGAGCVLHIILAPGFPGPCEWKERFVEINDETKTKVVRQIEGGFLDIGFTLYEDVFKIIERGPSSCTIQSSAFFEVKDEFESKASLITADTLWWMAKGVAEHALKVHKS*
Stephania_cepharantha|ScepChr11G00270490.1		MRGTLSTELEVGAPAQEVWAVISSPNSPNLILTLFPNMYEKFEIVKGNGGVGSLLHVIRSQGSSSIIIKILARSLSNLFRKIMRGHVTNELDVDLPADDVWVVYRSPDLPKLIVELQPGVFEKLDIVEGDGGVGTILHIILASGIDGPREWKEEFVEINDETRTKVVRQVKGGFLDIGFQLYEDVFKIIERGPCSCTIESSVFFQVEDKLIVPATLHRAAVPRRSSLQLPQPPLYRGHLAGAAAAGHRAAALPRSCAAAAAAGRRAAALPRRCSVAPLPTATAAAIVAPLPSPRRRPDLPPPPLLSLPFSAISFSPSLPLSSLPSPLLPFAVRRWGAPPSALQLESPLGSAGAAGAPRRSSLHLSLSSVRGGGARGGRSKQREGAHGGAPKKRTNDATS…
Stephania_cepharantha|ScepChr11G00270500.1		MENYCMIRKELKHELQVHASADDVWEVYSDPDLPRIIVQLLPGVFEKIDVVKGDGGIGTVLHLTYPPGSVPVPLTYLEKFVTIDDQQRLKEVRQIDGGYLDMGCLFYMDSFQIFERGCDKCVIVSKTEYIVPSQDIACRVEPYISIDSLASMATAISNYVYNRVLKVLKHKLEVQAPAKDVWEVYSSPELPTLIVKLLPSVFEKIEIVKGNGGVGTVLHLTYPPGSIPLTYKEKFVTIDNRRRLKEVKQIEGGYLDMGCTFYMDSFHIKERSSKSCVIVSKTEYEVPSEDLLSKVEPYISIDSLAEMAKAISKYVLQQKTTKPSVHAFLGRGDPSN*
Stephania_cepharantha|ScepChr11G00270510.1		MATAISNYVYNRVLKALKNKMVVQAPAKDIWDVYSSPDLPKLIVQLLPSVFEKIEIVKGNGGVGTVLQVTYPPGSIPLTYKEKFVTIDNRRRLKEVKQIEGGYLDMGCTFYMDSFHIKERSSKSCVIVSKTEYEVPSEDLLSKVEPYISIDSLAEVAKAISNYVLENKKP*
Stephania_cepharantha|ScepChr11G00270540.1		MIRKELKHELPVAASANDIWGVYSSPDLPKLIVKLLPSVFENIEIVEGDGGVGTVLRLTYPPGSVPLTYKEKFVTIDNEKRLKEVKQIEGGYLDMGCTFYMDSFHILENGCDACIIVSKTDYEVPNEEIASKVEPFISIDSLASMATAISNYVLNRVRKVLKNKLEVAAPAKDIWAVYSSPDLPKLIVQLLPGVFEKIEILQGDGGVGTVLRLTFPPGSIPLTYKEKFVTIDNRRRLKEVKQIEGGYLDMGCTFYMDSFHIKEKCSKSCVIVSKIEYEVPNKDVLSKVEPYISIDSLAKMATAISKYVLQQKKKA*
Stephania_japonica|SjapChr2G00041920.1		MKGQVSHELNVSVPASVVWEIYSGLELGQLVYKLLPDVIKMVELVEGDGGVGTVLKVTFPPVPGLGLTHFKEKFTKIDHENRIKETDVIEGGYLTFGFSLYRVIFEIVEKDAESSTIRSIIEYEVGDEFAENASLVTTKPLEAIAEAIAKYIIDGKKVKTTVAH*
Stephania_japonica|SjapChr2G00041930.1		MIRKELKHELPVAASAKEIWGVYSSPDLPKLIVKLLPSVFEKIEIIEGDGGVGTVLRLTYPPGSVPLTYKEKFVTIDNKKQLKEVMQIEGGYLDMGCTFYMDSFHILENGCDACIIVSKTEYEVPNEEIASKVEPFVTIDSLASMATAITNYVLNRVRKVLKNKLQVAAPAKDIWDVYSSPDLPKLIVQLLPGVFEKIEIVEGNGGVGTVLRLTFPPGSIPLTYKEKFVTIDDQRRLKEVKQIEGGYLDMGCTFYMDSFRIKEKGCESCVIVSKTEYEVPNKDVLSKVEPYISIDSLANMATAISNYEKLVTIDDQRRLKEVKQIEGGYLDMGCTFYMDSFRIKEKGCESCVIVSKTEYEVHNKDVLSKVEPYISIDSLANMATAISNYVLQQKA*
Stephania_japonica|SjapChr2G00041940.1		MEKYCMIRKELKHELQVPASADDVWEVYSDPDLPKIIVQLLPSVFEKIDVVEGDGGVGTVLHLTYPPGSVPLTYMEKFVTIDNRRRLKEVKQINGGYLDMGCLFYMDSFQIFERGCDKCVVVSKTEYIVPSEEIACRVEPFISIDSLASMATAISNYVSNRVLKELKHKLQVQAPAKDVWEVYSSPELPKLIMKLLPSVFENIEIVKGDGGVGTVLHLTYPPGSIPLTYKEKFVTIDNRRRLKEVKQVEGGYLDMGCTFYMDSFYIKEKCPKSCVIVSKTEYEVPREDLLSKVEPHISIDSLAEMAKAISNYVLQRNINKPSVPNVGAFLGRGNPY*
Stephania_japonica|SjapChr2G00041950.1		MEKYCMIRKELKHELQVPASADDVWEVYSDPDLPKIIVQLLPSVFEKIDVVEGDGGVGTVLHLTYPPGSAPLTYMEKFVTIDNRRRLKEVKQINALQQLKSYDSSSSLGSKSFKSSRFTGLKPPPMGLVGSSSGNDFADRLHRRKSSSVRAIVYSLSDLQAATGNFAAGRLLAEGSIGRVYRAKYADGKVLAVKKIDSSHFQGRSLEEFVDIVSNISKLKHPNVAELVGY*
Stephania_japonica|SjapChr2G00041960.1		MIRKELKHELPVAASADDIWEVYSDHDLPRLIVQLLPSVFEKIVIVQGDGGVGTVLDVTYPPGSVPLNYKEKIVTMDDRQRLKELKQIEGGYLDMGCTFYMDSFHILEKGWEECVIVSKTEYVVPNEEILSKVEPYISIDSLSGMATAISNYVYNRVLKALKHKLEVPAPAKDIWDVYSSPDLPKLIVQLLPNVFEKIEIVEGNGGVGTVVQVTYPPGSIPLTYKEKFVTIDKRRRLKEVKQVEGGYLDMGCTFYMDSFHIKEKGCESCVIVSKTEYEVPSEDLLSKVEPYISIDSLAEMAKAISNYVLEKKKP*
Stephania_japonica|SjapChr2G00041970.1		MRGHVTNELDVDLPADDVWAVYRSPDLPKLIVELQPGVFEKLDIVEGDGGVGTVLHIILASGVEGPREWNEEFVEINDETRTKVVRQVKGGFLDIGFQLYEDVFKIIERGPCSCTIDSSVFFQVEDKFESNASLITADSSWEMAKAIANYALNMNS*
Stephania_japonica|SjapChr7G00172010.1		MIRKELTYDLEVAAPAEDIFGVYSSIKLDLYLLVQLLPGVFEKHEVLAGDGDVGTLIYVKFVPGIYPNWFKEKFVTVDRKNHLKEVEMIEGGYLDMGCTYYLDSIHVIEKGPESCVIASKVTYEVPNEEVEKKVAPYISTTSLESMASVISKYVLNKRKKSLLHKLQVAASAKDEYWDAFGPTPSDSLPKLMLKVLPSVFKDMEIVKSNDGLGAHELRITIPPGLVGSLPVTTKEKWCGPKSLKKGCLYLMCIASIVLMVFLSSRVMAYKN*
Stephania_japonica|SjapChr7G00172020.1	SjaNCS4	MIKKELKHHLEVPVSADEIWAVYSSPDLAKHLLEQLLPGVFEKVKILEGDGGVGTVLLLKFPQACDKDSAAFLCGEVYDSRQREAIEGGGDGQGGYLDMGCTFYMDTIHVIAKGPDSCIIASKVNYEVPNEEIEKKVAPYISTEALEAMANVITNYVMNMKKKKALLELEVAAAKKKCEVNNGSSDLSKFILELLPRVFRDVEIVERKGGLGTDIRISIPPGLVCSVPVTNSNSDKFCGWRSGTNLRNWFLYLMSFVSLMLMVFLTSRFIADMF*
Stephania_japonica|SjapChr11G00262680.1		MQPQNPHVALRIILLVDSRVIVLPTQIEECQLRTFHAKLGNHEKNVLARMIEKELKHELEVGASADEIWGVYSSPDLNKYLLVELLPGVFEKHQVLHGDGDVGTIIFVKFVPGIVPRWFKEKFVTVDHKKRLMEVEMIEGGYLLMGCTFYMDTIHILEKGPDSCVILSKVTYQVPNEEIERKVAPYISTASLASMATAISNYVMNKRKKLLHELQVAASAKDEYYWDVYSNPSDMPKLVLQLLPIVFKEMEIAKSNDGRHGVHELRIAVPPGTNNEEKLYIWSGVKGSENSGKGLPDALTVSRISTYKEQMK*
Stephania_japonica|SjapChr11G00262690.1		MEVEMIEGGYLLMGCTFYMDTIHILEKGPDSCVILSKVTYQVPNEEIERKVAPYISTASLASMATAISNYVMNKRKKLLHELQVAASAKDECYWDVYSNPSDMPKLVLQLLPVVFKEMEIAKSNDGCHGVHELRIAVPPGTNNEEKLCIWSGKVISFKQCCLILMSVVSLVIVVFLSSSSRAIN*
Stephania_yunnanensis|SyunChr6G00154650.1	SyuNCS4	MIKKELRHYLEVPVPADRIWAVYSSPDLAKHLLEQLLPGVFEKVKILEGDGGVGTVLLIK FPPGTVPRCYEEKFVTVDNEKRLKEVVMVKGGYLDMGCTFYMDTIHVIAKGPDSCIVASK VNYEVPNEEIEQKVAPFISTEALEAMANVITNYVINMAKKKVLLEQEVAANVSAKKQCEF NGSSDLSKFLLELLPRVFRDVEIVERKGGLGTDIRISIPPVDRNEFKV*
Stephania_yunnanensis|SyunChr6G00154660.1	SyuNCS5	MIKKELRHYLEVPVPADRIWAVYSSPDLAKHLLEQLLPGVFEKVKILEGDGGVGTVLLIKFPPGTVPRSYEEKFVTIDNEKRLKEVVMVKGGYLDMGCTFYMDTIHVIAKGPDSCIVASKVNYEVPNEEIEQKVAPFISTEALEAMANVITNYVINMAKKKVLLEQEVAANVSAKKQCEFNGSSDLSKFLLELLPRVFRDVEIVERKGGLGTDIRISIPPGLVVPVTISDKGYGWCNRTNLKNRFLCLMSFASLMLMVYLSSKFIADMF*
Stephania_yunnanensis|SyunChr6G00154690.1		MIRKELTHELEVAAPADDIFGVYSSIELDLYLLVQLLPGVFEKHEVLAGEGDVGTIVYVK FVPGIYPNWFKEKFVIVDRKNRLKEVEMVEGGYLDMGCTYYLDSIHVIEKGPESCVISSK VTYEVPNEEMEKKVAPYISTTSLESMANVISKYVLNKRKKSLLNKLQVAASAKDEYWDAY GATPSDSLPILMLKVLPTVFKDMEIVKSNDGLGVHELRITIPPGISNFFKLIS*
Stephania_yunnanensis|SyunChr8G00181880.1		MKRKKWSEEEEETLINKYSELQSTGTLAKLKTREKKFQPIADHVNSLHHLIDPSTFPFRW SWRDVSIKVQNMRHQYMGVKQKIRVSDDDFNWADGDDHWPNFFKYKQVFGDVEIDHNKID GNNTFNDGEGENELELEVGLLSDDCSGGEGEEGKKRGQFGVVGLGREVLELGRVLGRRRE RERGREEEEMEREERWRERENEREERWAARERRMECVEMEWEERERVRARREMERRVRVE REFDEGRRRWMMKMEEKREEEEMVWRERMMELQIEHEKQMMQMHADASQSQMQVLGVLAR IVCQFFGAGNDGLGGGLGGLPPQVLQNLQHPGSLVGDNGKPDANSDTHFIGLELGQLAYK LLPDVIKMVELVEGDGGVGTVLKVTFPPVPGLG…
Stephania_yunnanensis|SyunChr8G00181890.1		MIRKELKHESPVAASAKSIWGVYSSPDLPKLIVKLLPTVFEKIEIVEGDGGVGTVLRLTY PPGSVPLTYKEKFVTIDNEKRLKEVKQIEGGYLDMGCTFYLDSFHILENGCDKCIIVSKT VYEVPNEEIASKVEPFISIDSLASMATAISNYVLNRVRKVLENKLEVAAPAKDIWAVYSS PGLPKLIVQLLPGAFDKIEILEGDGGVGTVLRLTFPPGSIPLTYKEKFVTIDNRRRLKEV KQIEGGYLDMGCTFYMDSFHIKEKCSKSCVIVSKTEYEVPNKDVLSKVEPYISIDSLANM ATAISNYVLQQKKA*
Stephania_yunnanensis|SyunChr8G00181930.1		MIKKELKHESPVAASADDIWEVYSDPDLPRIIVQLLPSVFEKIEIVEGDGGVGTVLHVTY PPGSVPLSYKEKFVTIDDWQRLKEVKQIEGGYLDMGCTFYMDSFHILEKGRDECVIVSKT EYTVPNEEILSKVEPYISIDSLASMATAISNYVYNRVLKVLKNKMVVQAPAKDIWDVYSS PDLPKLIVQLLPSVFEKIEIVKGNGGVGTVLQVTYPPGSIPLTYKEKFVTIDNRRRLKEV KQIEGGYLDMGCTFYMDSFHIKEKCSESCVIVSKTEYEVPSEDLLSKVEPYISIDSLAEM AKAISNYVLENKKP*
Stephania_yunnanensis|SyunChr8G00181950.1		LHLTYPPGSVPLSYLEKFVTIDDQRRLKEVKQIDGGYLDMGCLFYMDSFQIFERGCDKCV IVSKTEYIVPSQEIASRVEPYISIDSLAGMATAISNYIYNRVLKVLKHKLEVQAPAKDVW EVYSSPELPTLIVKLLPTVFEKIEIVKGNGGVGTVLHLTYPPGSIPLTYKEKFVTIDNRR RLKEVKQIEGGYLDMGCTFYMDSFLIKERSSKSCVIVSKTEYEVPSVLAFLGRGDPEEFD EEKELMAWSFPDGYKLVQERMVNVLLTNGKARLSHLTQIVLEEENDEIEVITTNQRHSIG AKRKLVKYPLTKNSVNSLAASDLVSKKSLDHGDGNNAVVMIDDEELEGKEEEKIALVSLH YRLIRSCYLFTFTRQMK*
Stephania_yunnanensis|SyunChr8G00181970.1		MEKYSIIRKELKHELQVNASADDVWEVYSDPDLPRIIVQLLPGVFEKIDVVVGDGGIGTV LHLTYPPGSVPLSYLEKFVTIDDQRRLKEVKQIDGGYLDMGCLFYMDSFQIFERGCDKCV IVSKTEYIVPSQEIASRVEPYISIDSLAGMATAISNYIYNRVLKVLKHKLEVQAPAKDVW EVYSSPELPTLIVKLLPTVFEKIEIVKGNGGVGTVLHLTYPPGSIPLTYKEKFVTIDNRR RLKEVKQIEGGYLDMGCTFYMDSFLIKERSSKSCVIVSKTEYEVPSEDLLSKDVVILILG ISTIRELMAEAVARDRVRDPVECTDRDNDLLMHRGKDIDMFPVGT*
Stephania_yunnanensis|SyunChr8G00181980.1		MRGHVTNELDVDLPADEVWVVYRSPDLPKLIVELQPGVFEKLDIVEGDGGVGTILHIILA SGIDGPREWKEEFVEINDETRTKVVRQVKGGFLDIGFQLYEDVFKIIERGPCSCTIESSV FFQVEDKFESNASLITADSSWGMAKAIANYALNINS*
Stephania_yunnanensis|SyunChr8G00181990.1		MRGHVTNELDVDLPADEIWAIYRSPEFPKLILGMLPPGVLEKLEVVEGDGGAGCVLHIIL APGSPEPREWMEEFVEINNEKKVKRVRMIQGGFLDLGFNFYENVFEITEIDECSCVYKSS VIYEADDNKFSTSAPLVSAASAWGIPYAIANHIMERKDM*
Thalictrum_thalictroides|TTHA_TU.02697.mRNA		MAFGNHCSSHHLRCEAHQAQLHANVWSELEVPDISAEDVWAVYSSPDLPKLIVKLMPSYFKRIDYILGDGHVGTILNITLQPTNSGSPLTWQEQFIEINHSTSTKVVRTINGGFLNMGFTLYEDIFQINRTGSKSCVIRSTVNFIILPGSESGASFVTADWSFAYAIVDYIRANRANNYLASKTDSQ*
Thalictrum_thalictroides|TTHA_TU.10170.mRNA		MRAQVWSELEVDIPADDIWAVYSSPDLPRLIVELMPARFQKIDVLEGDGTQGTVLGITLQPANSGPLTWNEQFVTIDHHTRTKVVRQIKGGFLDIGFNLYENIFTITPKGHNSCIIRATASFDIKEGSESGSSLITANWRMANVIAEYVLQNKANQ*
Thalictrum_thalictroides|TTHA_TU.10172.mRNA		MMRMEAILVFLMFLGTINCQKLILTGRPFLHHHDIIINQVSTVTKGVHHELKVAASADDIWGVYSSPDLAKHLPDLLPGAFEKLEIIGDGGVGTILDMTFPPGEFPHEYKEKFILVDNVHRLKKVQMIEGGYLDLGVTYYMDTIQVLPTGTDSCIIISSTEYHVKPEFVKIVEPLITTGPLAAMADAISKLVLAGKHISNSDKIVASITTI*
Thalictrum_thalictroides|TTHA_TU.10171.mRNA		MAGQIEHELEVNVHADVLWEIYGGLEFGRLAIRLLPKFFSSLEVIEGDGGVGTVLKLVFPEGAFLSYQKEKFTVIDNEKRLKVVEVIEGGFLELGFSFFRLYLQIIEKNPKSSIIKSTLEYEVKPGFEANVSLVSAQNQVLVTIAEAITNYVAEKI*
Thalictrum_thalictroides|TTHA_TU.12455.mRNA		MVSSSVVLANKTLFLVLTVFLLLSHHHHLQCEAQVSLPAQVWSELAVSDISAQDVWAVYSSPDLPRLIVELMPFRFQRIDVLSGDGTQGTILNITLQPTNSGPLTWHEQFVEINHLTLTKVVRQIEGGFLNIGFTLYENIFQITSTGLNSCVIRATNSFVITQGSESGASFITASWRMAYAVVDYIRANRANNYLASGTDVESNKSFQISMAIKFSPTFSHLQNRTLQEVVITNLGRNQVEYISNQNSRNTTF*
Thalictrum_thalictroides|TTHA_TU.12622.mRNA		MVGKVEHELEVRVPASELWEIYGGLEVGKMVTKLLPDVFESVEVVEGDGGVGTVLNVIFPKGTSLVTYLKEKFIVIDNEKRVKVVEVIEGGFLDLGFSLYQVYLQIIEKDSKSSIIKSSIEYEVKPGSEANASFVSIQNLQLVAEAIGKYLTEKV*
Thalictrum_thalictroides|TTHA_TU.17093.mRNA		MAFSNKSLLVVLAVFVLSHLGCEALQAQLPGSVISEFPVPDISAEDVWALYSSPELPTLIVQLMPSLYKSIDVMLGNGTEGTILKITLQPTNSGPLTWHERFVKVDHKTRTKVVRQMNGGFLNMGFTLYEDIFEIKSTGPNSCVIRATVNFIVLEESRSGASIITADWSMAYAMVDYIRRYNANNYLASKTDSQ*
Thalictrum_thalictroides|TTHA_TU.17348.mRNA		MVEHIEHELEVNVPAAQVWKIYGSLELADLICKLLPDFFENVEVIEGDGGVGTVLKLVYAKGIPMVTYQKEKFTVVDHEKRLIVAEVFEGGLLDHGFSLYRFIFQIIEKDANSSIIKSSIEYEVKPGYEANEAFPSAKGLEIKYLEGKQNSSGCGDIGNRGSVSIDMAVRDIHTKGSILERLALLENRLFQLCLEIEASSTSSSSVAHLSENTSYRQGSSMTTEQSNSVESIDEQNHSSDDNHHSFFHRALFNRFEFLGNSMNNSTEQKHLISTKDSEDIPKNGKKFKARNRRWKTILGC*
Thalictrum_thalictroides|TTHA_TU.23980.mRNA		MRGHVESEYEVAVSADEIWAVYSSPDLPRLIVELMPTRYQKIDVLEGDGTEGTIIRNYLVPTNPPPLTWNEKFMKIDNKTRTKVVRHIEGGWLDMGFTLYENIFTVIKKDENSCIITQRTVFDVTEEFESNVSLISSSWAMARAISNYVIQNRVNKDDNRKGATRCGCF*
Thalictrum_thalictroides|TTHA_TU.24307.mRNA		MRAQVWSELEVDLPADDIWAVYSSPDLPRLIVELMPTRFQRIDVLEGDGTQGTILHITLQPANSGPLVWNEQFTTIDHANRIKVVRQIRGGFLDIGFSLYENIFTITERGPHACTIRATANFDVNEGSESGTSLITANWRMARVIVDYVLQNNANKTAAS*
Thalictrum_thalictroides|TTHA_TU.26010.mRNA		MVFANKSLFVVLAVFLLSHLGCEAQVQLPANVWSELAVGDISAQDVWAIYSSPDLPRLIVELMPFRFQRIDVLLGDGTQGTILNITLQPTNSGPLTWHEQFVEINHRTRTKVVRQINGGFLNIGFTLYENIFQIRSTGRNSCVIRATNNFIILQGSESGASFITASWRMAYAVVDYIRANRANNYLASKTDSQ*
Thalictrum_thalictroides|TTHA_TU.28012.mRNA		MSLSLLASSTLSSSAIFTNPLHYSNTKISSSIIHVANKNIAYTCCEQKQQEDNNKNHNIIDRRNVLLGIGGLYGGASAATMVNNKAMMAIAAHLSPHDHSKQQLSLPYDDKKLHAEVWSELVVELPADEIWAVYSSHDLPRLIVELLPTRFDKIDIVEGDGGVGTVLYCVLNPANSGPQTWKEKIIKMDDKTRTKVVRQIEGGYLGIGFHMYEHIFTITPKDANSCIIRMTASFDVDDNSASNASMIIPNWNMGKAIANYVFQSKANKHNAHGN*
Thalictrum_thalictroides|TTHA_TU.34586.mRNA		MRAQVWSELEVNLPADDIWAVYSSPDLPRLIVELMPTRFQKIDVLQGDGTQGTILHITLQPSNSGPLVWKEQFTTIDHTNRIKVVRQIEGGFLDIGFTMYENIFTITARGPNACTIRATASFDVNEGFESNTSLITANWRMARAIVDYVVQNNAKKATA*
Tetracentron_sinense|Tesin01G0056500.1		MPEQVSHEKEVGVPASVVWDLYGTLKLAKLVDELLPNVLTKVEILEGDGGVGTVLKLTFPPGTPGITSCTEKFTKIDNEKRCKETTTIEGGYLDLGFSLYLVRFEIIEKDADSSIIKSTIEYEVKDGYASNVSLVNIKPMEAIAELVAKYFMEKKV*
Tetracentron_sinense|Tesin01G0056600.1		MPDQVSHEKEVGVPASVAWDLYGTLKLAKLVHEMLPNVIDKLEILEGDGGVGTVLKLSFPPGKPGFTYYNEKFTKIDKDKRFKEAEVIEGGYMDLGFRLYRTRFEIIEKDAHSSIIKSTIEYEVDDESASNASLVTIKPLEAIAELAAKYLTEKKAKDCNP*
Tetracentron_sinense|Tesin21G0093900.1		MWNSRMYINMIVDMRVFIKISFTEEEKMHGKVSHEKEVGVPASIVWDLYGTLKLGKLVDEMLPNVLDKVEVLEGDGGVGTVLKLTYPPGNPGFSSYTEKFMKIDNEKRFKEAEVIEGGYLDLGFQLYRVRFDVIEKDADTSIIKSTIEYEIEDESAANVSFVTVKPLEVIAELAAKYLTDKQTKA*
Tetracentron_sinense|Tesin22G0013300.1		MFNLGGGRRRKESRNPYPRFKAIAYEIQQPPFTDSTTLLRFHRKKKMRGRVASELQVGVPADDVWAVYSSPELPRLVVNLTPGVYQKIDIVEGDGGVGTVLDIVLTPVNPEPRTWKEKFVTIDNEKRMKVVRQIEGGYLDMGFQFYEDIFKIKANGTNSCIIRSSIVFEVADEFEVNAALVSSKASEDMAKAIANYVIQKKINCHKT*
Tetracentron_sinense|Tesin22G0013400.1		MRGQVYNDLEVGASAEEVWAVYSSPELPRLIVELQPGVFEKIDIVQGNGRVDTVLHVVLAQGLPEPREWKEKFMKIDHKERTKVVRQIEGGYLGLGFRFYEIIFKIIAKDEHSCIIRSTTAFDIEESFEANASLINASSMWGMAKAISNYVMQKKESGSNK*
Tetracentron_sinense|Tesin22G0013500.1		MRGQVYNDLEVGASAEEVWAVYSSPELPRLIVELQPGVFEKIDIVQGNGRVDTVLHVVLAQGLPEPREWKEKFMKIDHKERTKVVRQIEGGYLGLGFRFYEIIFKIIAKDEHSCIIRSTTAFDIEESFEANASLINASSMWGMAKAISNYVMQKKESGCNK*
Epimedium_pubescens|Ebr04G004100.1		MQQGRVSNELEVKVSASEIWEVYGSLQFGMIVHKLVPDVIQKVQVLQGDGGVGTILSVTFQPGIAYQKEKFTEVNDDKRIKVVEVIEGGYLDVGFCMYRIILEIIEKDVESSIIKSTIQYEVEDQNTANAYPVSTQVLVSMGEAVEKYLIDSRGMENV*
Epimedium_pubescens|Ebr04G004120.1		MRKELVAIFLVFLGFEISQGRPLFESKLSRKSTIRKVLHHETKVAASAQEVWDVYSSPELPKHLPELLPGAFEKVKIVGDGGVGTIIEMVFPPGKIPQRYKEKFVLIDDERLLKKVEMIEGGYLDMGVTFYIDTIHIVAIGKDSCVIKSSTEYYVKPQFLDVVEPVITTIPLEAMDEAISKIVLANKHKSLILPEFLKHLPDLHPGAFEIVEIVGYGGVGTIIEMVFPPSEVPRRYKEKFVLIDHKQLLKKIEMVKGEYMDMLVTFYMDTIYIIATGPDSCVIKSSTEYYVKPKFLDVVKPLITTIPLEAKDEAFLKIQLLKMVEMVEGGYLDMGVTFYIDTIHIIGIGIDSYVINQSTEYYVKPEFLDVVKPLINTIPLEAIDEAILNIPKFSRKSTL…
Epimedium_pubescens|Ebr04G004130.1		MRKELVAIFLVFLGCEVSQGRPLFQSKLSRKSTIRKVLHHETKVAASAQEVWDVYSSPELPKHLPELLPGAFEKVKIVGDGGVGTIIEMVFPPGEIPQRYKEKFVLIDDERLLKKVEMIEGGYLDMGVTFYMDTIHIVATGKDSCVIKSSTEYYVKPEFLDVVEPLITTIPLEAMDEAISKIVLANKHKSLIVI*
Epimedium_pubescens|Ebr04G004140.1		MRKELVAIFLVFLGCEVSQGRPLFESKLSRKSTIRKVLHHETKVAASAQEVWDVYSSPELPKHLPELLPGAFEKVKIVGDGGVGTIIEMVFPPGEIPQRYKEKFVLIDDERLLKKVEMIEGGYLDMGVTFYMDTIHIIATGKDSCVIKSSTEYYVKPEFLDVVEPLITTIPLEAMDETVAHPNRGSLIEVSFSWN*
Epimedium_pubescens|Ebr04G004150.1		MRKELVAIFLVFLGCEVSQGRPLFESKLSLKSTIRKVLHHETKVAASAQEVWDVYSSPELPKHLPELLPGAFEKVKIVGDGGVGTIIEMVFPTGEIPQRYKEKFVLIDDERLLKKVEMIEGGYLDMGVTFYMDTIHIVATGKDSCVIKSSTEYYVKPEFLDVVEPLITTIPLEAMDEAISKIVLANKHKSLIVI*
Epimedium_pubescens|Ebr04G004170.1		MGRPLFESKLFRKSTIRKVLHHETKVAASAQEVWDVYSSPELPKHLSELLPGAFEKVKIVGDGGVGTIIEMVFPPGTFTYKEKFVLIDDERLLKKVEMIEGGYLDMGVTFYMDTIHIVATGKDSCVIKSSTEYYVKPEFLDVVEPLITTIPLEAMDEAISKIVLANKHKSLIVI*
Epimedium_pubescens|Ebr04G004190.1		MRKGLVAIFLVFLGCEMSQGRQLLESKLSRKSTIVKVLHHETTVAASAQEVWDVYSSPELPKHLPDLLPGAFEKVEIVGDGGVGTIIEMVFPPGEVPRRYKEKFVLIDHEQLLKKVEMVEGGYLDMGVTFYMDTIHIVATGPDSCVIKSSTKYYVKPQFLDVVEPLITTIPLEAMDEAISKIVLAYKHKSLNEI*
Thuja_plicata|Thupl.29378874s0011.1.p		MVAGSFSIEVESPVEAKRFWNSNKDMHNFLPKHVPALVSGVTLLQGDGGVGTIRQINFTAANKDYSYVKEKVDLIDEANKVYSYSHVEGGDLGKKLASISFKIKYVPKPGGGTLVNYTCNFDSLPGVAHDEAKIEEIKAKTTGLIKQVEQYLIANPTTYC*
Thuja_plicata|Thupl.29380148s0025.1.p		MRTNPFIFGVSALVEKKVGRIAQIIGPILDVSFPPGNMPRIYNSLIVKDNDTTGQPISVTCELQQLLGNNKVRAVAMSATDDLMRGMKVIDTRGPLSVPVGETTLGRIFNVLGEPVDNLGPVDALTKYPIHRSTPAFTQLDTKFSIFETSIKVVDLLAPYHHGGKIGLFGGAGVGKTVLIMELINNIAKAHGGVSMFGGVGERTHEGNDLYKEMKESGVINEQNISESKVALVYGQMNEPLGARMRVGLTTLTMAEYF*
Thuja_plicata|Thupl.29379261s0013.1.p		XALVEKKAGRIAQIIGPVLDVSFPPGNMPRIYNSLIVKDNDTTSQPISVTCEVQQLLGNNKVRVVAMSATDSLMRGMKVINTGGPLSVLVGETTLGRIFNVLGEPVDNLGPVDALTKSPIHRSAPAFTQLVTKFSFFETGIKVVDLLAPYFRGGKIGLFEGAGVGKTVLIMELINNIAKAHGGVSMFGGVGERTREGNDLYKEMKESGVINEQNISESKVALVYGQMNELPGARMRVGLIALTMAEYF*
Lindera_megaphylla|GWHPBKHA002226		MVAGSVSNEIESPIASGRLWNAIVKDSHNLMPKLLPDIISSMVILQGDGGVGTIRQSNFSPAIKEFSYWKDRVDAVDDQKHIFKYSMIEGGLIGKKVKSTSFELKFSAAIDGARFVLEEMPLRRRPANEMPVEEVYERDRMMWLEQQMEMLTQQFQAFMANQNHPDHNPHDANDDFEDSDDSQEAPRQRRRHLRPPIEDRRRWEAGMRTEIPEFHGSLQPEEILDWICTTEEVLEFKGVPNNMKVPLVATRLRGRAAAWQATRTVEDYTTKFYQLLARNEIQELEDQLVARYIGGLRVQIQDTVNLLDPVLVSAAHQRALQVEKQLTSISNSGVTINPGGSSSGGVNRSSSSGNPGQRPPSNPTQLNRAINSGIKCFGCGETGHRLSECKKAGKKALFA…
Lindera_megaphylla|GWHPBKHA002230		MVKDSHNLMPKLLPDIISSIVILQGDGGVGTIRQSNFSPGDVSNLVIILFEFGLGSPDPSEYSDIDPSGLERDLILSDPSAIKEFSYWKDRVDAVDDQKHIFKYSVIEGGLIGKKVKSTSFELKFNAATDGSSVCKLSGEYETIEDRLPTEEETKEMIGGMIGMFKAVEGYLLANPDAYA
Lindera_megaphylla|GWHPBKHA020113		MLSHESEIDAPAGVVWETYGTLEVSKKANRQTAANLVQNIQVLEDVAGFSGYKEKFTNVDNEKHVKVVEMVEGGFLDMGFLLYRVRLEILERDGDSSIIRSTVEYEIAEESAAYASLITTDMLAIIAEVVGKHIAEEYKAKGQLSHELEVSVSAAVVWETYGTLQLDKLIVKLLPNVVRDLQVTEGNGGVGNLISLNWFHPDTPGFSVYKSKLTKIDNENRVRELELVEGEYLDVGFLLYRVRFEILEKDDDSSIIQSTIEYELAE
Lindera_megaphylla|GWHPBKHA020114		MLKCTIFVVSHELEVGAPAAVVWETYGTLQLGKLVVKLLPNIFQDIQVEGDGGVGTVLSLTFAPGAPAFAVYKEKFTKIDNENRVKETEVVEGGFLDLGFLLYRVRLQVLEKDSDSSIIQSTIEYELAEESAANASLVSTDSLAVIAEVVGNHLAEAYKAKLNS
Liriodendron_chinense|Lchi08317		MKGELSHEWEVRVPASIVWETYGTLELGKVIAQLLPNVVEKVELVEGDGGVGTVLAITFPEGTPGLSFYKEKFTKIDNENRVKETEVVEGGYLLLGFTLYRVRLEIIEKDSGTSIIRSSVEYEIGEGSTADPSIVSTKALEVMAQVVGKYLEEKNATAGNA
Liriodendron_chinense|Lchi08318		MQGKLSHEWEVRVPASIVWETYGTLELGKLVVQLLPNVIEKVEVMEGDGGVGTVLAVTYLEGMPGPRTFRERFTKIDNENRVKEVQLIEGGFLDLGFSHYGVRYEIIEKGIDASIIRSTIQYEIEEAFVANESLVSIDLLATVAEVVAKYLTEKKANESVA
Cinnamomum_kanehirae|CKAN_01875900		MKGQLSHESEIDVPAGVVWETYGTLEVSKQIAKLLPNLVQNIQVLEGDGGVGTVLAITLVPNVAGFSGYKEKFTKVDNEKHVKEVEMVEGGFLDMGFLLYRIRLEILERDGDSSIIRSTVEYEIAEESAAYASLITTDMLAIIAEVVGKHIAEEYKAKNNNNNKKMIKGQLSHELEVSVPAAVVWETYGTLQLDKLIVKLLPNVARDLQVMEGNGGVGTLVSLKVYKSKITKIDNENRVREVELVEREYLGVGFLIYRVRFKILEKDDDSSIIQSTIEYELAEESVIYASLVSINSLATIAEVVGKHLTEEYKAKLKA*
Cinnamomum_kanehirae|CKAN_01875800		MIKGQVSHELEVGAPAAVVWETYGTLQLGKLVVKLLPNIFQDIQAEGDGGVGTVLSLTFAPVGAPAFAVYKEKFTKIDHENRVKETEVVEGGFLDLGFLLYRIRLQVLEKDSDSSIIQSTIEYELAEEAAANVSLVSTDSLVAIAEVIGNHLAEEYKAKLNS*
Aristolochia_fimbriata|Af02G077300.1		MKGQRVHEYVVPFPAPDVWGVVGSLELPHLLSNMPGVHRNLTVMGDGSVGTILIFLYIAGWPFKGFRERISTLDHANRVKDVDVVQGGVLNYGYTSCRTRFEVLDLDDQGGSTGTSSTLRTTVSFDIDENKAPQNAVEMVALMQMDAVGKAIAKYLVEKKSRPRKLAGEQSLEQVLSWPVAPVWDVYSSLKLPELFRRVFPDVQWQGDGSVGTIFTVTLNPGPLPSYKEKLVTLDQQRRIKELDVIEGGVREKDFTFYRLRSQFVENGPNSTLFKINIRYELNASAPTAAENMKLANIRAVSMAGDLVSDYLKNQTKGA*
Aristolochia_fimbriata|Af02G076800.1		MRGKKISEIDVAFPASVVWDVYSTRKLSEVVKTIPNFRGKQEVIGDGGVGTIISGELPPGGPYGAYREKWVTIDHENRVKETDTIEGGVLDVGFVFYRLRFEIAEEGPNASRIKTIIMYEIKDEFAAGNEYIADQNLAQMETMARAVVKYLDDTNAAAAAAAAAPLPL*
Aristolochia_fimbriata|Af02G264000.1		MHGRVSHELEVKQPASKVWEIYGTVELGNLVVQKLPNVAEKIEFDGDGGAGTVVTLTFPNGAGTYKEKFVAVDDEKRVKVTEVVEGGYLDLGFTSQRITLEIAEKEGGSCIIKSSVDYEIDDQNASKSSLVTTATLELFAQTVAKHLGESNAEMGSEDARGE*
Aristolochia_fimbriata|Af05G030700.1		MGFVETRTAGNAFRRFTETLVTLNGEDRVKEVDVNEGGFLDVGYTFYRTRFEIVEKGPNMATVKKSIIYEIQDEFAANESLASIDENPAQVKAVEDFLTNRRATDGLIRGEQIISVDIPFSAQQVWDVYANTEQLAQIFKNVPGTALEDIQVVGDGGLGTLIILILRPGSTFRQFTETLVTLDHGQRVKEVDVSEGGYLTVGYTFYRTRFEILSKGPNRATVRKSIIYNLREDSAANLALAAVNENPDQVKAVENFLNGSSSTSTESSNPGFIM*
Piper_nigrum|Pn2.949		MNEFDVAFPAMQIWAVYSTLILPEILGNIPNFFRDIQITGNGSVGTLFDIYTPPGAPFPWFREEIVKLDQKRMIKELQLIEGGLLTIGYTSSMTRFEIIKKGTNVTTVRSSYIYEIRDQNYTNEASTSVSNLGTILNAVVQYLNRNSTTSPAANNSGSLP
Piper_nigrum|Pn2.832		MNEFDVAFPAMQIWAIYSTLILPEILGNIPNFFRDIQITGNGSVGTLFDIYTPPGAPFPWFREEIVKLDQKRMIKELQLIEGGLLTIGYTSSMTRFEIIKKGTNVTTVRSSYIYEIRDQNYTNEASTSVSNLGTILNAVVQYLNRNSTTSPAANNSGSLP
Piper_nigrum|Pn6.1060		MKGKQTNEFDIQFPAAEVWNVYSTLILPDIIRNIPNFFKDIKVTGDGSVGTTFDMYTLPGAPFSWFKERIVTLDQKHYVKEVMTIEGGVLTLGYTSFKTRFEIIKKGKNLTTVKSSYIYEINDADSANEAGTNVSGLGTILKAVVAYLQQNASSSAAPAVNPVGLPSKD
Piper_nigrum|Pn6.905		MKGKQTNEFDIQFPAAEVWNVYSTLILPDIIRNIPNFFKDIKVTGDGSVGTTFDLYTLPGAPFSWFKERIVTLDQKHYVKEVMTIEGGVLTLGYTSFKTRFEIIKKGKNLTTVKSSYIYEINDADSANEAGTNVSGLGTILKAVVAYLQQNASSSAAPAVNPVGLPSKD
Piper_nigrum|Pn2.1440		MNEFDVAFPAMQIWAIYSTLLLPEIVGNIPNFFRDLQITGDGSVGTLFDIYTLPGAPFPWFREEIVTLDQKRMIKEVQLIEGGLLTMGYTSSMSRFEIIKKGANVTTVRSSFTYEIRDQNYTNEASTSVRNLATILNAVVQYLNRNSTASPSANNSGSQP
Piper_nigrum|Pn56.30		MNEFDVAFPAMQIWAIYSTLLLPEIVGNIPNFFRDLQITGDGSVGTLFDIYTLPGAPFPWFREEIVTLDQKRMIKEVQLIEGGLLTMGYTSSMSRFEIIKKGANVTTVRSSFTYEIRDQNYTNEASTSVRNLATILNAVVQYLNRNSTASPSANNSGSQP
Piper_nigrum|Pn66.3		MKRGKKTIETDISFPALDVWEVYSSLELPEIIRNIPNYVKDIKVTGDGSVGTTYDIWTLPGSPFDWYKEKVTRLDQEELIKEVDVIEGGVLHFGFTFFQTKFEIVSRLLSSTVL.SPLCCTRSRISMSTMSRWPPPTTWHR.PRPWRSISGRRRLAGDLYWTLTSPLVMGLPQSSTLADSPV
Piper_nigrum|Pn15.965		MKGQVSHELEVNVPACKAWEIYSTLKLANLVVKKLPHLIGKIEVHGDGGVGSVLKLIFPPGTPGLSWYKEKFTVIDNEKRMKVAETVEGGYLDMGFTLFRVTFQIQEKGSDCCVIKSIIDYEVAEENAANASNMVNTQVLEAIAKVAAAQLTQTPETELDLDLLVFV
Piper_nigrum|Pn8.2770		MATPRQGPTATVNGKAASAVAAATRMGGGVGVHYHPYSSLLFLFAAAAAAAAAGVHPLPSPLRSPPPGHPQRAVELFYRMMAAGYTPDCYSYAGLLESLFKLRKITKAVDVYCSIIGDKLQVDAYIHTIVLHGLIRASRFEEAWILFGKMKELGLCPSTFTCNVILRCLYVWNVYSTLILPEIVKNIPNLFQDLQVTGDGSVGTTFDIYTLPGAPFSWFKEEVVALDHENRVKEVKTKEGGVLTLGYTSFMTRFEIIDKGCNHTTIRSSYIYEINDADSANEAGTNVSGLITIAKAVVAYLQQNASSTTS
Spirodela_polyrhiza|Spipo22G0015500		MVAGSYTQETESTIAPARLWKAGILDAHVLLPKISPEIIASIDIIEGDGGVGTIKQCNFTPAVPDHKFVKDRTDVIDGENYVFKYTVIEGGFLGPRISSYSLELSFTAAAGGSKGKLTLSYETTDETPLSEEEVGKILFGSDATLKAIEGYLHANPDAYV*
Calamus_simplicifolius|CALSI_Maker00010903		MKGSLFHELEVGLPAGEVWEVYGTLRLARLVVELLPNVVQKIDLIEGDGGVGTVLHLTFPPGMPGPQFYKEKFIKIDNEKRVKDAIVIEGGYLDLGFRSYLVRFEIIEKDINTSIIKSTIEYEVDEEHKANASFVTTVPLAAIAETISKYLVGNKTSVTNS*
Cocos_nucifera|CCG027541.1		MKGSLSHELEVCLPAGEVWEVYGTLRLAQLVVELLPRVVQKVDVIEGDGGVGTVLYLTFPSGTPGVQFYKEKFVKIDNEKRVKEALVVEGGFLDLGFRSVLYRFEIIEKDGNSSIIKSTIEYEIDEEHAANASFVTIASVAAIAETISKHLAEKKTSVMNS
Cocos_nucifera|CCG027542.1		MKDSLFHELEVCLPAGEVWEVYGTLGLAQLVVELLPHVIQKIDVIEGDGGVGTILHLTFPPGTPGIQFYKEKFVKVDNEKRVKEVMVVEGGFLDLGFRSVLYRLEVVEKDSNSSIIKSTIEYEIDEEHAANASFVTIAFLATIAEAISKYLTEKKASVMNS
Elaeis_guineensis|rna-XM_010910197.2		MKGSLFHELEVGLPASEVWEVYGTLRLAQLVVELLPHVIQKVDVIEGDGGVGTVLKVTFAPGTPGVQFYKEKFVKVDNEKRVKEVLVVEGGFLDLGFRSVLFRLENIEKDSNSSFIKSTIEYEIDEEHAANASLVTTAFLATMAETISKYLTEKKTGVMNS*
Phoenix_dactylifera|rna-XM_008801892.4		MKGSLFHELEVGLPAGELWEVYGTLRLAELVVELLPNVVQKFDIVEGDGGVGTVLRLAFPPGMPGSQFSKEKFIKIDNEKRVKEALVVEGGYLDLGFRSFLFRLEIIEKDSNSSIIKSTAEYEIDEEHAANASFVTVAPFATMAETISKYLIEKKTSVMNS*
Allium_sativum|Asa0G05310.1		MKGSLFHEYEVALPANELWEVYSALKLADLVVELLPNIIAKADLEEGDGGVGTVLRLALPPGLPGVTYYKEKFVTVDHEKRLKEAAVIEGGYLALGFTYYMVTFQILEKNSDVSTIKSIIDYEVDEEHKANAMFVSITPLATISEAVAKYLLDQKKINS*
Allium_sativum|Asa6G05635.1		MKGSLLHEYEVALPANEIWQVYGTLELGQLLVELLPTMVSKIEVVEGDGGAGTVLRFTLPPGLPGVTTYKEKFVTVDHQKRLKEITVIEGGYLAMGFKSYNVSFQILEKNSNVSIIKSTIDYDVEEEHKENASYASIAALAAISETISKFLLEKKKASAAV*
Allium_sativum|Asa0G03616.1		MSSGTWSLEIESSAPAAQLFKAAMLDWHNLGPKLLPDILSSANSIEGNGGVGSVRQLNFTSAMPVPFAKERLDFIDNEKLECKNTLIEGGGIGIKLESASSFFKFNPKSNGSGCRVKVEATYKTLPGVVVTDEIEKAKEGVSGVIKAAGAYLAANPTAYA*
Allium_sativum|Asa6G05366.1		MKGSLLHEYEVALPANEIWQVYGTLELGQLLVELLPTMVSKIEVVEGDGGAGTVLRFTLPPGLPGVTTYKEKFVTVDHQKRLKEITVIEGGYLAMGFKSYNVNFQILEKNSNVSIIKSTIDYDVEEEHKENASYASIAALAAISETISKFLLEKKKASAAV*
Allium_sativum|Asa1G03726.1		MSSGTWSLEIESSAPAAQLFKAAMLDWHNLGPKLLPDILSSANSIEGNGGVGSVRQLNFTSAMPVPFAKERLDFIDNEKLECKNTLIEGGGIGIKLESASSFFKFNPKSNGSGCRVKVEATYKTLPGVVVTDEIEKAKEGVSGVIKAAGAYLAANPTAYA*
Allium_sativum|Asa0G01799.1		MKGSLFHEYEVALPANELWEVYSALKLADLVVELLPNIIAKADLEEGDGGVGTVLRLALPPGLPGVTYYKEKFVTVDHEKRLKEAAVIEGGYLALGFTYYMVTFQILEKNSDVSTIKSIIDYEVDEEHKANAMFVSITPLATISEAVAKYLLDQKKINS*
Apostasia_shenzhenica|ASH_rna4976		MPVVPSPALRKALSCSIFSYRNPQIIAMVAGSIGRDYLSPVSPNRIWKAVIFDAHNLIPKLLPDFISSVEILEGDGGVGTIKQLNATEAVTEFRFIKEKTDILDNEKHRVKQSIIEGGLIGLLLKSYSVELKLEEDTDGGTLGKIIVEYETLGDTPLSSEEEEKIMEGVYLVIKTIDQYLLANPTAYV*
Apostasia_shenzhenica|ASH_rna4977		MSSSWTAEVEAKASPAKLFKAIFLEWHHLGPKIVPHSIASIVNISGDGGPGSLRQTNFTPVVPFSFVKEKLEFIDHDKLEVKVSLVEGGDLGKKIECASSHFKIEAKGSGAVVKAVGTFKAIGGVDVADDIIRAKESFIEIVKGVDGYLAANPTACA*
Apostasia_shenzhenica|ASH_rna8070		MIKGALCHEFKVDVPADELWRIYGSIKLAEVVMKLIPHVIAKVEVEVGDGGVGTIIRTTYPQDKSGPKYSKQNFLKVDNENRVKEIEVIEGGLLELGFTSYLIHFEIVDINGSSAIIKSGILFELDDDHLESASLASIVPSVHVARTVISYLKST*
Asparagus_officinalis|evm.model.AsparagusV1_04.1427		MKGSLSHELEVALPAYEVWEVYSTLRLAELTVDLLPDVVSKFEVEEGDGGVGTVLRLTLGPGAPGMTYYKEKFIKIDHEKRLKDAIVVEGGYLNLGFSSYLVRFEILEKSSDSSIIKSTIEYELPDEHAANASFVTTAALAAIAEGVSKHLTEKKKATEA*
Dioscorea_alata|Dioal.05G180300.1.p		MDRDKLMKMAGAVRTGGKGSVRRKKKAVHKTATTDDKRLQSTLKRVGVNAIPAIEEVNIFKDDTVIQFTNPKVQASIGANTWVVSGSPQTKNLQDLLPGIISQLGPDNLDNLRKIAEQFQKQAPSGAAATAPEDNDEDVPQLVPGENFEQAAEEKETS*
Dioscorea_alata|Dioal.04G159000.1.p		MKGTLSHELEISLPADEIWSVYRGLELAELVVKLLPNVIYKMDLVGGAGEVGTILHLYFPPGTPLVQSYKEKFTKIDDEKHIKEAYVVEGGYLDLGFISYMVRFEVIKKSEADSIIVSTIEYEVDENFASNASLISTAPLAIIHETVGKYLIEKKSNA*
Dioscorea_alata|Dioal.04G158800.1.p		MKGAVSHELEVALPAEKIWAVYRGLRLAELIVELLPNLLNKFEIIEGDGEVGTILRLHWPPGMPMAMVIYKEKFTKVDDERRVKEVHTIEGGFLQLGFSSYMVRLEIIAKGEAASIIRSVIEYEVDDKFANNVSFVSTTTLATIHETIGKYLVEQES*
Dioscorea_alata|Dioal.08G085100.1.p		MKGTTSYELEVGLQAEKIWAVYRGLRLAELMVELLPTLIEKFDIVQGDGEVGTILCLHWSPGTPIAEISKEKFTKIDDEKRINEVHTIEGGYLQLGLDSFMVRLEIIAKGEAASVIRSIMEYEIDDKFADKASLVSTATMATIHETIGKYLVKQES*
Dioscorea_rotundata|rna-XM_039266942.1		MKGTLSHELEISLPADEIWSVYRGLELAELVVKLLPTVIYKMDLVEGDGGVGTILHLYFPPGTPLVQSYKEKFTKIDDEKRIKEAYVVEGGYLELGFISYMVRFEVIEKSEADSIIMSTIEYEVDEDFASKASLISTAPLAIIHETVGKYLIEKKSNA*
Dioscorea_rotundata|rna-XM_039265687.1		MKGAVSHELEVALPAEKIWTVYRGLRLAELIVELLPNLLNKIEIIEGDGEVGTILRLYWPPGTPMAAAIYKEKFTKIDDERRVKEVHTIEGGFLQLGFTTYMVRLEIIAKGEADSVIRSVIEYEVDDEFANNVSFVSTATLATIHETIGKYLVEQES*
Dioscorea_rotundata|rna-XM_039269087.1		MDRDKLMKMAGAVRTGGKGSVRRKKKAVHKTATTDDKRLQSTLKRVGVNAIPAIEEVNIFKDDTVIQFTNPKVQASIGANTWVVSGSPQTKNLQDLLPGIISQLGPDNLDNLRKIAEQFQKQAPSGAAATAPEDNDDDVPQLVPGENFEQAADEKETA*
Dioscorea_rotundata|rna-XM_039273763.1		MSFSIEIDCSVSALRMFNLALHGLHLIGHEILPDVIKSASTIHVDGGVGSIRHIIFTPGFPFPYMKERLDFLDAVNFELRQSLVEGISLGTKLESASWCFKFIPINNGKSVFKMTTTYKLLTGVQLSDEEEKVKEMITGIIKACDDYLLANPNVCV*
Ananas_comosus|Aco012954.1		MKGSLCHELEVGLPAGEIWEVYGTLRLARLAVELLPNILQKADIVHGDGGVGTVLHLTFPPGNPGPQYYKEKFTKVDNDNYVKEAVVIEGGYLELGFTSYLVRFEIVKKDGDSSVIRSSIEYEIDDENAGNASFVTTGPLVSIAEAISSHLMKQKSAGLVPINGQIKDQKKEAMKGSVCHELDTDLPVDELWAVYGTLRLVQLAAELLPNIVQKVSTVHGDGEVGTVIQVNFVPGIPGPPYQKEEFVKVDNENRVKEAKVIEAGFLLFGFQSYLMRFEIVKKDNDSSVIRSTVEYEIDDEHASNASLVTTDLVATIAQVIAKYLKDQKSSPPSS*
Brachypodium_distachyon|Bradi5g20060.1.p		MRKSQSHDFETDVPAAELWEVYGTLRAAELLPELLPQVLSKVELVSGDGGLGTILELTFPPGIPGLEKYKEKFTKIDNEKYIKEAETIDGDVLKLGFLYYMVRFEIIVKGPSSSVIRSTIEYEIDDGHPELESMVSTAPLAATAERFAGYIKEQKIAQSST*
Brachypodium_distachyon|Bradi3g48400.1.p		MKGSLSHELETGLPAAEVWEVYGGLLVGQLVPQLLPHMLSKVELVEGDGGIGTVLLLTFPPGIRGFEYQKEKFIKIDNENFVKEVLVVEGGFLECGFQKYLVRIEIIGNADKTSVIRSTIEYEVGDEHAAGSESFVSTSILACVAEAITKYIKANPSAEQPAPNQAS*
Brachypodium_hybridum|Brahy.D05G0267200.1.p		MRKSQSHDFETDVPASELWEVYGTLRAAELLPELLPQVLSKVELVSGDGGLGTILELTFPPGIPGLEKYKEKFTKIDNEKYIKEAETIDGDVLKLGFLYYMVRFEIIVKGPSSSVIRSTIEYEIDDGHPELESMVSTAPLAATAERFAGYIKEQKIAQSST*
Brachypodium_hybridum|Brahy.S04G0151400.1.p		MKGILSHELETGLPAAEVWEVYGGLLVGQLVPQLLPHMLSKVELVEGDGGVGTVLLLTFPPGIPGLEYQKEKFIKIDNENFVKEVLIVEGGFLDHGFQKCLIRLEIIGNADKTSVIRSTVEYEVGDEHAAGSESFVSTSILACIAEAITKYIKANKSFEQAAPNQTSK*
Brachypodium_hybridum|Brahy.D03G0668300.1.p		MKGSLSHELETGLPAAEVWEVYGGLLVGQLVPQLLPHMLSKVELVEGDGGIGTVLLLTFPPGIRGFEYQKEKFIKIDNENFVKEVLVVEGGFLECGFQKYLVRIEIIGNADKTSVIRSTIEYEVGDEHAAGSESFVSTSILACVAEAITKYIKANPSAEQPAPNQAS*
Brachypodium_hybridum|Brahy.S09G0196600.1.p		MRKSQSHDFETDVPASELWEVYGTLRAAELLPELLPQVLSKVELVSGDGGLGTILELTFPPGIPGLEKYKEKFTKIDNEQYIKEAETIDGDVLKLGFLYYMVRFEIIVKGPSSSVIRSTIEYEIDDGHPELESMVSTAPLAATAERFAGYIKEQKIAQSST*
Brachypodium_mexicanum|Brame.04PG253000.1.p		MYLHTAHSFGSTADQRTKAMNGSLSHELETGLPAAEVWEVYGGLLAGQLLPPLLPHMLSKVELVEGDGGVGTVLLLTFPPGIPGLEYQKEKFIKIDNENFVKEVLVVEGGFLDHGFQKCLTRFEIIGNANKTSVIRSTIEYEVGDEHAAGRGSFISTSILACVAEAITKYIKANQSAEQPAPNQAS*
Brachypodium_mexicanum|Brame.09PG224400.1.p		MRKSQSHDFETDVPASELWEIYGTLRAAELLPELLPQVLSKVELVSGDGGIGTILELTFPPGIPGLEKYKEKFTKIDNEKYIKEAETIDGDVLKLGFLYYMVRFEIIVKGPSSSVIRSTIEYEIDDGHPELESIVSTAPLAATAERFAGYLKEQKIAQSST*
Brachypodium_mexicanum|Brame.09UG225600.1.p		MRKSQSHDFETDVPASELWEVYGTLRAAELLPELLPQVLSKVELVSGDGGIGTILELTFPPGIPGLEKYKEKFTKIDNQKYIKEAETIDGDVLKLGFLYYMVRFEIIVKGPSSSVIRSTIEYETDDGHPELESMVSTAPLAATAERFAGYIKEQKIAQSST*
Dichanthelium_oligosanthes|Do021732.1_mrna		MHIALRPTELIGSMEAGSLCHEFETDLPAADVWEVYGGLLLGQLVPQLLPHVLPKVEHLEGDGGVGTALLVYFPPGAPGPGTHKEVFTKIDNENYIKEATVVEGGFLDLGFKKFMFRLEIIAKEEKASLIRSSIEYEVDDEHKSNASLVSTGALAAIAEAITKYIKEEKSSNKQAAD*
Dichanthelium_oligosanthes|Do014272.1_mrna		MEGSLCHEFQTDLPATDVWEVYGSLVLGQLVPELLPQVLSKVELVEGDGGVGTVLLVTFPPAGKYKEKFTMVDNEKYIKEAAVIEGGFLDLGFKKYVVRFEIVGQEDGTTIIRSTIEYKVDAEHTSNASLVSTGALVAIAETITKYIKEQKSPMEDREQT*
Digitaria_exilis|Digex_tig00010466_573170-mRNA		MKGSLRHEFETGLPAADVWEVYGGLLVGDLIPQLLPEVFSKVELVEGDGNVGTVLLVTFPPGTPGSEFFKEKFIKVDNENYIKEVLVTEGGFLDHGFQKYLVRIEIIRKKEKTSIIRSTIEYEVDHEHANNPPVVSTSGLATIAEAITKYIKEQKGLE*
Digitaria_exilis|Digex_tig00011063_517260-mRNA		MEGSLCHEFQTDLPVSVVWEVYRSLALGELVPQLLPQVLSKVELVEGDGGAGTVLLVTFPPTGTSGPASYKEKFTVIDNEKYIKEATVIKGGFLDLGFQKYVVRMEIVQQEDGTTIIKSTIEYKVDAEHASNASLISTGALAAIAEAITKYIKEQKTGPQALE*
Digitaria_exilis|Digex_tig00011063_517270-mRNA		MKGSKVHEHEADVPASDLWSIYGTLRAAELLPELLPHVLAKVELLSGDGGVGTTLKLTFPPGIPGLESYKEKFTKVDNDNYIKEAEAIEGDILKLGFLSYRIRFEIIAKGPDSSVIRSTVEYEIDDAHPELEAMASTAPLAATAEKFAEHAKEKKVLQATS*
Digitaria_exilis|Digex_tig00011387_404540-mRNA		MATGLTKAMKGSLCHEYETELPASDVWEVYRGLLAGQLVPQLVPEVHPKVELVEGDGGAGTVLLVSFPPGTPWPSTFKEKLIKIDNEKYIKESLIIEGGFLDQGFKFFLIRIEIIGKEENTSVIRSTIEYEVANEYKNNPPVASTSGLASIAEAIAKYAKEKRAQAMGQLSEE*
Eleusine_coracana|ELECO.r07.4BG0336570.1		MKGSKCHEHEADVPAAELWKIYGTLRFVELVHELLPQVLHKVDVVKGDGTVGTVIQVTFPPGNPGPQSYKELFAKIDNENRVKEAAVIEGDILAMGFTKYVTRFEIVEKGPSSSLIRSTVEYEFDDGRDELEAAASTAPLEAAAEIITKYIKEQTATAN*
Eleusine_coracana|ELECO.r07.4BG0336580.1		MKGSKSHELEADVSASELWAIYGTLRAAELLPELLPQVLAKTEVLSGDGGVGTILLLTFTQGGTGTEKFVKVDNENYVKEAVAIDGDMLKAGFLSYMIRLEIISKGPDSSVIRSTVEYEFDDGRAELEGLVSTEPLAAAAEVFSKYVKEQKTH*
Eleusine_coracana|ELECO.r07.6BG0477250.1		MKGSKVHELETDVPASDLWAIYGTLRAAELLPELLPHVLAKVVLISGDGGVGTILELIFPPGIPGLQSYKEKFVKVDNENYVKETETIEGDLLKLGFLSYRVRFEVTAKGPTSSMVRTTIEYEIDDAHPELESMVSTAALAAAAEKFAVYAKEKVPHAAT*
Eleusine_coracana|ELECO.r07.4AG0305600.1		MKGSKCHEHEADVPAAELWKIYGTLRFVELVHELLPQVLHKVDVVKGDGTVGTVIQVTFPPGNPGPQSYKELFAKIDNENRVKEAAVIEGDILAIGFTKYVTRFEIVEKGPSSSVIRSTVEYEFDDGRDELEAAASTAPLAAAAEIITKYVKEQTATAN*
Eleusine_coracana|ELECO.r07.4AG0305580.1		MKAIKSHELVVDVPASELWKIYGTLRLQELVHQLLPQVLQNFKVIRGDGGVGTVIQVTVLSPGSSNPVTYTTEFVKIVNKNYILEAPTIEGDVLNLGFTKYVTRFEIIKKGPSSSVIKSSVAYEFDDARPELEAAASTTPLALAARAIVKYVKEQKATESSS*
Eleusine_coracana|ELECO.r07.4AG0305610.1		MKGSKSHELEADVSASELWAIYGTLRAAELLPELLPQVLAKTEVLSGDGGVGTILLLTFTQGGTGTEKFVKVDNEKYVKEAVAIDGDMLKAGFLSYMIRLEIIGKGPDSSVIRSTVEYEFDDARPELEGLVSTEPLAAAAEVFSKYVKEQKTH*
Eleusine_coracana|ELECO.r07.4AG0327710.1		MKGSKVHELEADVPASDLWAIYGTLRAAELLPELLPHVLAKVDLISGDGGVGTILELIFPPGIPGLQSYKEKFVKVDNENYVKETETIEGDLLKLGFLSYRVRFEVTAKGPTSSIVRTTIEYEIDDAHPELESMVSTAALAAAAEKFAEYAKEKKVPHAAT*
Eragrostis_curvula|EJB05_44570.mrna		MKGSKVHELEADVPASDLWAIYGTLRAAELMPELLPHVLAKVELVSGDGGVGTILELTFPPGIPGLQSYKEKFTKVDNENYVKETETVEGDLLKLGFLAYRIRFEVIAKGPSLSVVRTTIEYEIDDARPELEAMVSTEPLAAAAEKFAEYAKEKKVPQATS*
Eragrostis_curvula|EJB05_44577.mrna		MSSRPIYRPPTCGRSMEASFWGSWFPNCFLMYSQRLSLWRETVASGQSCLLPSLLLLPPGTSESATYKEKFIKVDNENFVKEAAAIEGGFLNFGFLKYMVRFEIIGKEDATSIIRSTIEYEVEEKHASNASLVSTSALAEIAEAITRYIKERKSLGQAPEQASG*
Eragrostis_curvula|EJB05_39469.mrna		MPINTSIHSSDFRTGSGRQREPSIMKGSKSHELEADVPAAELWKIYGTLRFVELVHQLLPQVLYKVDVVRGNGGVGTVIQVTLPPGRPALQSYKEEFVKIDNENRVKEAAATEGDILNLGFTTYLTRFEIIEKGPGSSVIRSTVEYEFDDGRPELEGVASTAPLAAAAEAIVNYPAFEAMNGSLCHELETGLPAADVWEVYGGILVGELIPQLLPEVFSKVELVEGDGGVGTVLLVTFPPGTPGSETFKEEFIKVDNQNYIKEVIVTEGAFLDRGFQKYLVRIEIIGKEDKTSVIRSTIQYEVNAEHTGNRPVVSTNGLAAISEAITKHIKQQRSAQQTPK*
Eragrostis_curvula|EJB05_39470.mrna		MKGSKSHELEADVPAAELWKVYGTLRFVELVHQLLPQVLHQVDVVRGDGGVGTVVQVTFPPGNPGPQSYQEEFVKIDNENRVKEAAAIEGDILNLGFTTYVTRFEIIEKGPGSSVIRSTVEYGFDDGRPELEGAASTAPLAAAAETIVKHVKEQAKTAEASS*
Eragrostis_curvula|EJB05_39490.mrna		MVKAIKSHELETDVPAAELWKIYGTRRFVEVVHQLLPQLLQKVVIVRGDGGIGTITLKYGVLPGSPSPVTYKEEFTKIDNENYIKEVTAIEGDVLKPGFTKYVTRLQIIDKGPSSSVIKSSVEYEIDDGHPELEAAVTTTPFALAARAIAKYVKENK*
Eragrostis_curvula|EJB05_39488.mrna		MKGSKSHELEADVPAAELWKVYGTLRFVELVHQLLPQVLHQVDVVRGDGGVGTVIQVTFPPGNPGPQSYQEEFVKIDNENRVKEAAAIEGDILNLGFTTYVTRFEIIEKGPGSSVIRSTVEYGFDDGRPELEGAASTAPLAAAAETIVKHVKEQAKTAEASS*
Eragrostis_curvula|EJB05_39486.mrna		MNGSLCHELETGLPAADVWEVYGGILVGELIPQLLPEVFSKVELVEGDGGVGTVLLVTFPPGTPGSETFKEEFIKVDNQNYIKEVIVTEGAFLDRGFQKYLVRIEIIGKEDKTSVIRSTIEYEVNAEHTGNRPVVSTNGLAAISEAITKHIKQQRSAQQTPK*
Hordeum_vulgare|HORVU2Hr1G106200.2		MGMRRNKVHEYEADAPAAELWGLYGTLRAAELLPELLPQVLSKIELVSGDGDVGTILQLTFAPGIPGLETYKEKFIKVDNENYIKEAQTIEGDILKLGFLYYMVRFEIIAKGPSSSLVRSTIVYEIDEATHPHLEAMVSTGPLAATAEKFEAYLKEQKTAQSN*
Hordeum_vulgare|HORVU2Hr1G106240.1		MKGSLCHEFETGLPAAEVWEMYRGLRISQVVPQLLPGIFRKVELVEGDGGVGTVLHLTFSHGIAPLEYQKEKFIKIDHENYVKEVIVVEGGLLDHGFQKYLIRIEIIGQTKKTSTIRSSIEYEVDDEKTDNASFASTGALANLAEAITEYVKAQKSAEQAREETA*
Joinvillea_ascendens|Joasc.05G137500.1.p		MKGSLCHEFETGLPAAEVWEVYSTLRLGQLVTELLPDLLAKVELVKGDGGVGTVLLLTFPPGTPGMQSYKEQFIKVDNENYVKEATVIEGDLLNLGFQKYLVRFEIIGKEENSSIIKSTIEYEIGNEHASNASFVSTGAVAAIAEAITKYIKEQKSFQQSA*
Kobresia_littledalei|mrna.FCM35_KLT10462		MSCTMTSEITTVIPAPRLFKAAITDWHNLAPKIAADKVISSANIEGDGGVGTVRQVNFGPAMPFSYEQKRLEFLDVENCEIKSSVVGGGGLGVFLESASYHVKFSPSGTGGSLVKIVLTYTPMPGANSEQYENMTKGALEGIMKGCEAFLLANPDAYN*
Miscanthus_lutarioriparius|rna-NCGR_LOCUS16005		MKGSKVHEHETDVPASELWAIYGTLRAAELLPQLLPQLLTKADLVSGDGGVGTILQLTFPPGIRPGLQSYTEKFIKVDNENYTKEAEAIDGDILKLGFLAYMIRVDIISKGPNSSVIRSTIEYEIDDAHPEVEAMVSTALLAAAAEKFSEHAKEKKVPQATS*
Miscanthus_lutarioriparius|rna-NCGR_LOCUS19444		MKGSKVHEHEADVPASELWAIYGTLRAAELLPELLPHVLAKVELVSGDGGVGTILQLTFPPGIPGLQSYKEKFIKVDNDNFIKEAEAIDGDILKLGFLAYMIRFEVISKGPNSSVIRSTIEYEIDDAHPELEAMVSTAPLAATAEKFSEHAKEKNVIPQATS*
Miscanthus_lutarioriparius|rna-NCGR_LOCUS19467		MKGSKVHEHEADVPASELWAIYGTLRAAELLPELLPHVLAKVELVSGDGGVGTILQLTFPPGIPGLQSYKEKFIKVDNDNFIKEAEAIDGDILKLGFLAYMIRFEVISKGPNSSVIRSTIEYEIDDAHPELEAMVSTAPLAATAEKFSEHAKEKNVIPQATS*
Miscanthus_lutarioriparius|rna-NCGR_LOCUS33124		MARSSNETVEVSANDERRMCGLAGDDDEDDLREDAAELFGPRVEDPIEADGDSNDATGGEEGEDDNDDKRSRPSTSAVWLDFKKLFKKDPKASTGGTPNTYTTAQTIESSRSAQLKGRGTRNEGKQGPRARGDVPASELWAIYGTLRAAELLPELLPHVLAKVDLVSGDGGVGTILQLTFPPGIPGLQSYKEKFIKVDNENYIKETEAIDGDILKLGFLAYMVRFEIIPKGANLSVIRTTIEYEIDDAHPEVEAMVSTAPLAAAAEKFSEHAKEKKVPQATS*
Miscanthus_lutarioriparius|rna-NCGR_LOCUS37313		MKGSKVHEHETDVPASELWAIYGTLLPAKLLPELLPHVLAKVELISGDGGVGTILKLIFPPGIPGLQSYKEKFIKVDNENYIKEAEVVEGDILKLGFLYYMVRFEIISKGPNSSVIRSTIEYEVDDAHQELEAMVSMAALAATAEKFSEHAKENKAPHATS*
Miscanthus_lutarioriparius|rna-NCGR_LOCUS40328		MKGSKVHEHETDVPASELWAIYGTLLPAKLLPELLPHVLAKVELISGDGGVGTILKLIFPPGIPGLQSYKEKFIKVDNENYIKEAEVIEGDILKLGFLYYMVRFEIISKGPNSSVIRSTIEYEVDDAHQELEAMVSMAALAATAEKFSEHAKENKAPHATS*
Miscanthus_lutarioriparius|rna-NCGR_LOCUS40345		MKGSKVHEHETDVPASELWAIYGTLLPAKLLPELLPHVLAKVELISGDGGVGTILKLIFPPGIPGLQSYKEKFIKVDNENYIKEAEVIEGDILKLGFLYYMVRFEIISKGPNSSVIRSTIEYEVDDAHQELEAMVSMAALAATAEKFSEHAKENKAPHATS*
Miscanthus_lutarioriparius|rna-NCGR_LOCUS40329		MKGSKVHEHETDVPVSELWAIYGSLLAAKLLPELLPHVLAKVELVSGEGGVGTILKIIFPPGIPGLQSYTEKFIKVDNENYIKEVKAVEGDILKLGFMYYMVRLEIISKGPNSSVIRSTIEYEVDDAHPELEPMVGIAVLAAAAEKFSEHAKENKAPQSTY*
Miscanthus_lutarioriparius|rna-NCGR_LOCUS40364		MKGSKVHDHETDVPASELWAIYGTLLPAKILPELLPHVLTKVELISGDGGVGTILKLIFPPGIPGLQSYTEKFIKVDNENYIKEAEVIEGDILKLGFLYYMVRFEIISKGPNSSVIRSTIEYEVDDAHQELEAMVSMAALAATAEKFSEHAKENKAPQATS*
Miscanthus_lutarioriparius|rna-NCGR_LOCUS43241		MTTTELTKAMKGSLSHEFETGLPAADVWEVYGGLLVGDLIPQLLPQVFSKVELVEGDGGVGTVLLVTFPPGTPGSEAFKEEFIKVDNENCIKEVLVTEGSFLDHGFKKYLVRTEIIGREQKTATIRSTIEYEVDPEHASNPPVVSTSGLATIAKAITEYIKQKKGPEHFKIAIGYKISFSSCLQVQVPQKRSLCVYLSMSTELKAMKGSICHEFETGLPAADVWGEGDGRAGSVLLITFPPGTPGSETFKEKFIKVDNENYIKETIVTEGGVLDHGFQKYMVRIEIMGKEEKTSIIRSTMEYEVDDEHANTPLCSVPMG*
Miscanthus_lutarioriparius|rna-NCGR_LOCUS45818		MKGSICHEFETGLPAADVWGVYGTLLFGKLMPQLLPEVVSKVELLEGDGGAGSVLLITFPPGTPGSETFKEKFIKVDNENYIKETIVTEGGVLDHGFQKYMVRIQIIGKEEKTSIIRSTMEYEVNDEHADTPPVFSTDGLATIAKAITKYIKEQKGSVEAPK*
Miscanthus_lutarioriparius|rna-NCGR_LOCUS67720		MKGSKVHEHETDVPASELWAIYGTLRAAELLPQLLPQLLTKADLVSGDGGVGTILQLTFPPGIRPGLQSYTEKFIKVDNENYTKEAEAIDGDILKLGFLAYMIRVDIISKGPNSSVIRSTIEYEIDDAHPEVEAMVSTALLAAAAEKFSEHAKEKKVPQATS*
Miscanthus_sinensis|Misin08G289800.1.p		MKGSKFHEHEADVPASELWAIYGTLRAAELLPELLPHVLAKVDLVSGDGGVGTILQLTFPPGIPGLQSYKEKFIKVDNENYIKETEAIDGDILKLGFLVYIIRFEIIPKGANLSVIRTTIEYEIDDAHPEVEAMVSTAPLAAAAEKFSEHAKEKKVPQATS*
Miscanthus_sinensis|Misin06G353600.1.p		MKGSKVHEHEADVPASELWAIYGTLRAAELLPELLPHVLAKVELVSGDGGVGTILQLTFPPGIPGLQSYKEKFIKVDNDNFIKEAEAIDGDILKLGFLAYMIRFEVISKGPNSSVIRSTIEYEIDDAHPELEAMVSTAPLAATAEKFSKHAEEKNVIPQATS*
Miscanthus_sinensis|Misin09G143200.1.p		MKGSKVHEHETDVPASELWAIYGTLLPVKLLPELLPHVLAKVGLISGDGGVGTILKLIFPPRIPGLQSYKEKFIKVDNDNFIKEAEVIEGDILKLGFLYYKVRFEIISKGPNSSVTRSTIEYEVDDAHQELEAMVSMAALAAIAEKFSEHAKENEAPRATS*
Miscanthus_sinensis|Misin09G143300.1.p		MKGIKVHEHETDVPASELWAIYGSLLATKLLPELLPHLLAKVELVSGDGGVGTILKLIFPPRIPRLQSYTEKFIKVDNENYIKEVEAIEGDILKLGFMYYMVRLEIISKGPKSSVIRSTIKYEVDDAHPELEAMVGMAAFAATAEKFSEHAKENKAPQATY*
Miscanthus_sinensis|Misin03G284600.1.p		MKGSKVHEHETDVPASELWAIYGTLRAAELLPQLLPQLLTKADLVSGDGGVGTILQLTFPPGILPGLQSYTEKFIKVDNENYTKEAEAIDGDILKLGFLAYMIRVDIISKGPNSSVIRSTIEYEIDDAHPEVEAMVSTALLAAAAEKFSERAKEKKVPQATS*
Oryza_sativa|LOC_Os04g50700.1		MRGSQSHELETDVPASELWKIYGTLRAAELLPELLPHILAKVELVTGDGGVGTIVRLTFPPGIPGLQSYKEKFIKVDNKNYVKEAEAVEGDILKLGFLSYMIRFEIIRKGANTSVIRSTIEYEIGDEHPELQAMVSTASLAATAEKFAEYIKTQKVAQANT*
Panicum_hallii|PhHAL.2G152700.1.p		MKGSKVHEHETDVPASDLWAIYGTLRAAELLPELLPHVLAKVEVISGEGGVGTILQLTFPPGIPGLESYKEKFTKVDNENYIKEAQAIGGDILKLGFLSYMVRFELIAKGPDLSVIRSTVEYEIDDAHPELEAMVSTAPLAATAEKFSEHAKEKKVSITQAAS*
Panicum_hallii|PhHAL.2G163700.1.p		MEGSLCHEFWTDLPAINVWEVYGSLTLAQLVPQLLPQVLSKVELVEGDGGVGTILLVTFPPSGTSGLASYKEKFTMVDNEKYIKEAEVIEGGFLDLGFQKYLVRFEIVGQKDGLTIIRSTIKYKVHAEHASNASLVSTGALAAIADAMTKYIKEQKSPKQASEQTSEEEAPKQKSGEQASEL*
Panicum_hallii|PhHAL.2G153000.1.p		MKGSKVHEHETDVPASDLWAIYGTLRAAELLPELLPHVLAKVEVISGDGGVGTILQLTFPPGIPGLESYKEKFTKVDNENYIKEAQAIGGDILKLGFLSYMVRFEVIAKGPDLSVIRSTVEYEIDDAHPELEAMVSTAPLAATAEKFSEHAKEKKVSITQAAS*
Panicum_hallii|PhHAL.7G266400.1.p		MATELNKSMEGTLCHEFETGLPAAEVWEVYGGLVVADLIPQLLPEVFSKVELVEGDGDVGTVLLVTFPPGAPGSQTFKEKFIKVDNENYVKEALVTEGGFLDHGFQKYLVRIEIIGKEEKTSIIRSTIEYEVHHEHANNPPVVSTSGLATIAESITKYIKEQKGLE*
Panicum_virgatum|Pavir.2NG230900.1.p		MKGSKVHEHEADVPASDLWAIYGTLRAAELLPELLPHVLAKVEVVSGDGGVGTILQLTFPPGLPGLESYKEKFTKVDDESYIKEAQAIDGDILKLGFLSYMVRFEVIAKGPDSSVIRTTVEYEIDDAHPELEAMVSIAPLAATAEKFSEYAKEKKVITQAAS*
Panicum_virgatum|Pavir.2NG230700.2.p		MEGSLCHEFPTDLPAIDVWEVYGSLTLARLVPQLLPHVLSKVELVEGDGGVGTILLVTFPPSGNSGLASYKEKFTMVDNEKYIKEAEAIEGGFLDLGFEKYLVRLEIVGQEDGPTIIRSTIEYKVDAEHASNASLVSTGALATIADAITKYIKEQKNPKQAGEQTSEEQAPRQKENKASEVIGRQV*
Panicum_virgatum|Pavir.2NG153000.1.p		MKGSTVHEHETDVSASDLWAIYGTLRAAELLAELLPQVLAKVEVISGDGGVGTILQLTYPPGIPGLESYKEKFIKVDNENYIKEAQVIDGDILKLGFLSYMVRFEVIAKGPDSSVIRSTVEYEIDEAHPELEAMVSPAPFAAIAEKFSEYTKEKKLITQAAS*
Panicum_virgatum|Pavir.7KG327192.1.p		MEGTLCHEFETGLPAAEVWEVYGGLLVGDLIPQLLPEVFSKVELVEGDGGVGTVLLVTFPPGTLGSQTFKEKFIKVDNENYVKEVLVTEGGFLDHGFQKYLVRIEIIGKEEKTSIIRSTIEYEVHHEHANNPPVVSTSGLATIAESITKHIMEQKGLE*
Panicum_virgatum|Pavir.7NG289000.3.p		MAVWEVYGGLLVGDLIPQLLPEVFSKVELVEGDGGVGTVLLVTFPPGTPGSQTFKEKFIKVDDENYIKEVLVTEGAFLDHGFQKYLVGIEIIGKEEKTSIIRSTIEYEVHHEHANNLPVLCALEAIFGDAIVILDRKGGQRCFQVHVHIEIPDAIDVSTRLNYGDGKLKYGATSDADTDDLVYKFRVEHLPPILLTFLLPASYPSHQAPIFTISTYWLDKGMISSLCRMLDMLWEEQQGMEVTYQWVQWLQSSTLSHLGFGNEIVLGKNDVTCDADKRACLDNASPDVIIPRMMRYNDNKHHEAFLHAIHDCMICFSECPGVDFIKLPCHHFFCWKCMQIYCKMNVKEGNVVKLLCPNTKCEGAVPPNILKRLLGEDEFERWEGLLLQRTLDAMSDVVY…
Panicum_virgatum|Pavir.2KG214616.1.p		MKGSKVHDHETDVPASNLWAIYGTLRAAELLPELLPHVLAKVEVVSGDGGVGTILQLTFPPGIPGLESYKEKFTKVDDENYIKEAQAIDGDILKLGFLSYMIRFEVIAKGPDSSVIRSTVEYEIDDAHPELEAMVSTAPLAETAEKFSEHAKEKKVITQATP*
Panicum_virgatum|Pavir.2KG491600.2.p		MEGSLCHEFPTDLPAIDVWEVYGSLTLAQLVPQLLPHVLSKVELVEGDGGVGTILLVTFPPSGTSGLASYKEKFTVVDNEKYIKEAEAIEGGFLDLGFEKYLVRFEIVGQEDGPTIIRSTIKYKVDAEHESNASLVSTGAVAAIADAITKYIKEHKSPKQASEQTSEEQATRQKSGEQGV*
Panicum_virgatum|Pavir.6KG232100.2.p		MKGSTVHEHETDVPASDLWAIYGTLRAAELTVELLPHILAKFEVISGDGGVGTILHLTFPLVSIPGLESYKEFTKVDNENYVKEATVIDGDLLKLGFLFYMIRIEVIAKGPGSSVVRTTVEYEIDDAHPELEAVARAAPFGVIAVKLSEHAKEKKVITQAAS*
Paspalum_vaginatum|Pavag06G211000.1.p		MATELTRTMKGSLCHEYETGLPAADVWEVYGGLLAGQLIPQLLPQVFSKVELVEGDGGAGTVLLVTFPPGTPGSEAFKEKFIKVDNENYIKEALVTEGGFLDHGFKKYLVRIEIIGKEENTSIIRSTIEYEVDDEHADNPPVVSTSGLATIAAAITKHIKEQKGPE*
Paspalum_vaginatum|Pavag06G211100.1.p		MTTDITKAMKGSLCHEYETGLPAADVWKVYGGLLAGQLVPQLLPELFSKVEVVEGDGGVGTVLLVSFPPGTSGSSETSKEKFTKIDNENYIKESLIIEGGFLDHGFKRYLVRFEIIRKEEKSSIIRSTIEYGVDDEHKSNPPVASTSDFAAIAEAITKYIKEKSIEQDPEQLSEEQSIQLI*
Paspalum_vaginatum|Pavag02G188300.1.p		MKGSKVHEHDSDVPASELWAIYGTLRAAELLPKLLPHVLAKVEVVSGDGGVGTILQLTFPPGIPGLESYKEKFIKVDNENYIKESETIEGDLLKLGFLSYMIRFEVIAKGPNSSVIRSTIDYEIDDAHPELEAMVSIAPLAATAEKFAEHAKEKMATQAAA*
Setaria_italica|Seita.8G085500.1.p		MATELNKAMKGSLCHDLVTGLDAADVWEVYGGLLVGNLIPKLLPEVFSKVELVEGDGGVGTVLLVTFPPGTPGSETMEEKFIKVDNENYIKEALVTKGGFLDHGFQKYLVRIKIIGKGEKTSIIRSTIEYEVDHEHASNPPVPSTSGLAAIAEAITKYIKEQKALE*
Setaria_italica|Seita.2G151000.1.p		MQRELLALHPTDLTRSMEGSLCHEFETDLPAADVWEVYGGLRLGQLVPQLLPHVLPKVDHLEGDGGVGTVLLVYFPPGAAGPRTHKEVFTKIDNENYIKEATVVEGGFLDLGFKKFMFRLEIIAKEENSSLIRSSIEYEKLTTTIKAMPPLSVLVL*
Setaria_italica|Seita.2G151100.1.p		MKGSKVHEHETDLPASDLWAIYGTLRAAELLPELLPHVLAKVELVSGDGGVGTILQLTFPPGIPGLESYKEKFIKVDNENYIKEAQTIDGDILKLGFLSYMIRFEIIAKGPDSSVIRSTIEYEIDDAHPELEAMVNTAPLAATAEKFSEHAKEKKAPQATS*
Sorghum_bicolor|Sobic.003G383900.1.p		MKGSKVHEHEADVPASELWAIYGTLRAAELLPELLPHVLAKVELLSGDGGVGTILQLTFPPGIPGLQSYKEKFIKVDNENFIKEAETIDGDILKLGFLAYMIRFEVISKGPNSSVIRSTIEYEIDDAHPELEAMVSTAPLAETAEKFSEHAKEKSVIPQATS*
Sorghum_bicolor|Sobic.006G198800.1.p		MVKGSKHHELEADDVPASELWKIYGTLRFVELVHELLPQVLHQVEVLRGDGTVGTVIKVTFPPGNPGVQTYSEEFVKIDNENRVKEAAVIEGDLLTLGFTTYLTRFQIIDKGPSSSVIASTVEYEYDDGRPELEAAASTAPLAAAAERLVQYVKEQMTTTTTAQATAA*
Sorghum_bicolor|Sobic.006G199000.1.p		MKGSLSHEFETGLPAADVWEVYGGLLVGDLIPQLLPQVFSKVELVEGDGGVGTVLLVTFPPGTPGSEAFKEEFIKVDNENCIKEVLVTEGSFLDHGFKKYLVRIEIIGKEQKTSTIRSTIEYEVDPEHASNPPVVSTSGLATIAKAITEYIKKKKKG*
Thinopyrum_intermedium|Thint.V1252900.1.p		MSPNTSSSTECRNGWISSPLLCPCALSKNNIMIEFKAGLANYVNKSKITPKAMKGSLCHELKSSLPAAEGQLIPQLLPDVLSKVEVVVGDGGVGTILRLTFPPGIPGLEYQKEKFIKIDNENFVKEALVKEGGLLNLGFLKYLVRFEIVGDADNTSTIRSTVEYEVDDEHAGNASFVTTSTFARIAEAITKYIKAQKGDEKALEQTL*
Thinopyrum_intermedium|Thint.02G0674100.1.p		MKGSLCHELKSGLPAAEVWEVYGGLLLGQLIPQLLPDVLSKVEVVVGDGGVGTVLRLTFPPGIPGLEYQKEKFIKIDNENFVKEALVIEGGLLDLGFLKYLVRIEIVGDADKTSTIRSTVEYEVEDEHTGNAAFVTTSTLARIAEAITKYIKAQKGDEKAPEQTS*
Thinopyrum_intermedium|Thint.06G0394100.1.p		MAMRKNKVHEFEADVPAADLWGLYGTLRAAELLPELLPQVLAKIQLVSGDGDVGTILELTFAPGIPGLETYREKFIKVDNENYIKEAQTIDGDILKLGFLYYMVRFEIIAKGPSSSVIRSTIVYEINEETHPGLEAMVSTGPLAATAEKFAGYLKEQKIAQSN*
Thinopyrum_intermedium|Thint.05G0425600.1.p		MAMRRNKVHEFEADVPAAELWGIYGTLRAAELLPELLPQVLAKIQLVSGDGDVGTILQLTFAPGIPGLETYREKFIKVDNENYIKEAQTIDGDILKLGFLYYMVRFEIIAKGPSSSVIRSTIVYEINEETHPHLEAMVSTGPLAATAEKFAGYLKEQKIAQSNKFLQWLRAEVYQCFERNNV*
Thinopyrum_intermedium|Thint.14G0735400.1.p		MAMRRNKVHEFEADVPAAELWGLYGTLRAAELLPELLPQVLAKIQLVSGDGDVGTILELTFAPGIPGLETYREKFIKVDNENYIKEAQTIDGDILKLGFLYYMVRFEIIAKGPSSSVIRSTIVYEINDETHPGLEAMVSTGPLAATAEKFAGYLKEQKIAQSN*
Thinopyrum_intermedium|Thint.20G0311100.1.p		MEGGSLWHEFETDLPAADVWEVYGSLALGQLVPQLLPHVLSKVELVEGDGGVGTVLLVTFPPAGASEPRSYQEKFNVVDHEKYIKEAETAEGGFLDLGFRKYLVRFEVVGKEDGTSVIRSTVEYEVDAEHAKNVSLVSTEAMASIAEAITKYIKEQKKSPQQATE*
Thinopyrum_intermedium|Thint.20G0316200.1.p		MEGGSLWHEFETDLPAADVWEVYGSLALGRLVPQLLPHVLSKVELVEGDGGVGTVLLVTFPPAGASEPRSYREKFNVVDDEKYIKEAETVEGGFLDLGFRKYLVRIEVIGKEDGTSVIRSTVEYEVDADHAKNVSLVSTEALASIAEAITKHIKELKKIPEQVNE*
Urochloa_fusca|Urofu.7G258000.1.p		MSLDNKFMHTRTQTRLRIESTDRHTQLSAGAMKGVKSQELDADGVPASELWDIYAGIGFAQLFHKLLPQVLRKVEVVRGDGGVGTVLQLTLASPGDPAGSQQELNYQEEFVKIDNEKRIKETLAIEGDILKLGFTKYVTRLEVIDKGPTSSTIRSTLEYEFADGHPEIEDAANTAPLAAAAESIVQYVKEQKAT*
Urochloa_fusca|Urofu.7G258200.1.p		MKGSKSHEVEADVPAAELWKIYGTLRFVELVHQLLPQVLYQVEVVRGDGGVGTVIKVTLPPGIPGRHSYKEEFVKIDNENRVKEAAVIEGDILNLGFITYVTRFEIVEKGPSSSVIRSTVEYEYDDGRPELEAAARTAPLAAAAEKIVQYVKEQKAAQASA*
Urochloa_fusca|Urofu.7G258800.1.p		MATDLAEAMKGSLCHEYEIELPAADVWEVYGGLLAGQLVPQLVVPKVYSKVELVEGEGGIGTVLLVSFPPEKFVKIDNEKYIKEALIIEGGFLDRGFRKYLIRIEIIGKGENASIIRSTIEYEVDDGPKDNPPPNPPPTPPPPYCQYKWFSCYC*
Urochloa_fusca|Urofu.7G258500.1.p		MATELTKAIKGSLCHEFETGLPAADVWEVYGSPLVGNLIPKLLPEMCSKVELVEGDGGVGTIMLATFPPGTPGSSTFKEKFIKVDNENYIKEALITEGGVLDHGFQKFLSRIEIIGKGEKTSIIRSTIEYEVDHEHANNPPVVSTSVLATIAEAVTKYIKEQKALEPRRRTPCRCR*
Urochloa_fusca|Urofu.7G258500.2.p		MATELTKAIKGSLCHEFETGLPAADVWEVYGSPLVGNLIPKLLPEMCSKVELVEGDGGVGTIMLATFPPGTPGSSTFKEKFIKVDNENYIKEALITEGGVLDHGFQKFLSRIEIIGKGEKTSIIRSTIEYEVDHEHANNPPVVSTSVLATIAEAVTKYIKEQKALE*
Urochloa_fusca|Urofu.7G258400.1.p		MKGSKSHELEADVPAAELWKIYGTLRFVELVHHLLPQVLHQVEVVSGDGRVGTVIKVTFPPGNPGPQSYKEEFVKIDDENRVKEAAAIEGDILNLGFINYVTRFEIVEKGPGSSVIRSTVEYEYDEGRPDLEAAASTAPLAAAAERLVQYVKEQKATQASA*
Urochloa_fusca|Urofu.2G151000.1.p		MVKGSKVHELETDVPASELWAIYGTLGAATLIPELVPHVVSKVDLISGDGDVGTIVQLTFPPGIPGLNSYKEKFTTVDHERYIKVAEAIEGDILELGFLSYLLRFEVIAKGPDSSVIRSTLDFETDDAHPDLESKVSTAPLATIAEAFVKYVKEKKIIPQATS*
Urochloa_fusca|Urofu.2G151100.1.p		MEGSLSHEFQTDLSATDVWEVYGGLVLGHLVPQLLPNVLSKVELVEGDGGVGTVLLVTFPPAGTSELGSYKEKFTMVDNEKYIKEAEVVEGGVLHLGFQKYVVRFEIIGQEDGTTVIRSTIEYKVDAEHTSNASLVSTGALAAIAEAITKYIKEQKSLLL*
Urochloa_fusca|Urofu.2G150700.1.p		MKGSKVHEHEVDVPASDLWAIYGTLRAAELLPELLPHVLAKVELVSGDGGVGTILQLTFPPGIPGLESYKEKFTKVDNENYIKQAQAIDGDILKLGFLFYMIGFEIIAKGPGSSVIRSTVEYEIDDAHPELEAMVSTAPLAATAEKFAEHAKAKMTPQAAA*
Zea_mays|Zm00001d019895_T001		MKGSKVHEHEADVPASDLWAIYGSLRAAELLPELLPHVLAKVELVSGDGGVGTILQLIFPPGIPGLQSYKEKFIKVDNENYIKEAEAIDGDILKLGFEAYMIRFEIIPKGANSSVIRSTIEYVIADAHPELEAMVSTATLAETAQKFSEFAKAK*
Zizania_palustris|mrna.GUJ93_ZPchr0014g47424-1		MKGSRSHELETDIPASQLWEVYGTLRAAELLPELLPHILAKVEVVTGDGGVGTVLQLTFPPGIPGLQRYKEKFVRVDNKNYVKEAVAIDGDILKLGFLSYLIRFEIIQKGPSSSVIRSTLEYEIGDGNPHLQAMVSTASLAATAEKFAEHIKEQKAAQTNT*
Zizania_palustris|mrna.GUJ93_ZPchr0004g38190-1		MKGSLCHEFETGLPAAEVWEVYGGLRIGYLAPQLVPQVFSKVELVEGDGGVGTVLHVIFSPGTPGSESLKEKFTKIDNEKYIKETEVIEGGFLDHGFQKYSIRIEIIEKTDSSSVIRSTIDYEVDDESKSGYASTSVLATIAEAATNYIKEQRSSN*
Musa_acuminate|GSMUA_Achr4P27340_001		MKGTLCHELEVGLPAGQVWEVYGTLRLAQLVVELVPNVIQKVDIVEGDGGVGTVLHLTFPTGTSGGPQFYKEKFVKIDDENRLKEAIVVEGGYLEMGFLSFLVRFEIIDKEEGVSSIIKSTIEYEVDEEHAGNASLVTTAAVAAIAEGVSGYLMKEKSGASN*
Zingiber_officinale|Zioff05G0197700.1		MKGALCHELEVQVDASELWEVFSHLKLGQLVPQLLPNIFEKVELVEGDGGVGTVLLCTFAAGIGGPRHYKEKFVKIDHENRVKEAAGVEGGLLELGFTYYLIRFQIVEKERGSSIIRSTVEFEVDEEHKTNASLASTDIVAVIGEAVAGYLLEEKKKKGEALNS*
Zingiber_officinale|Zioff05G0563700.1		MKGALCHELEVQVDASELWEVFSHLKLGQLVPQLLPNIFEKVELVEGDGGVGTVLLCTFAAGIGGPRHYKEKFVKIDHENRVKEAAGVEGGLLELGFTYYLIRFQIVEKERGSSIIRSTVEFEVDEEHKTNASLASTDIVAVIGEAVAGYLLEEKKKKVQDLVQDTDTLAEDWYIAMEALCGILPSLQPIIVYFSDCSQWLSRAIPKSNRKEFIKKVEEILHLVPDPVVFIYGQSIMESGSKEKEKLAFNLLLYVLPDDMLGNLCRRQCCSLVLVALLSWSITLTLCLKLELSNSSRHMVNV*
Papaver_armeniacum|Par_contig_38.1		MAESLKYTLISEFDVAAPADDVWALIASKDAPKTFQMLLPRMFDKLEIIEGDGGVGTVLLVVYPPGSVPLTNEEKFVTIDDHRRLKEILQTKGGYLDMGVTFYMESFQIVPKVYNSCVFKSMVRYEVPDELAPHVSSLISVEGLLTMAKAAAKYVVDNK*
Papaver_armeniacum|Par_contig_38.2		MRYQFFFLIFLLFSSIYMAESLKYTLINELDVAKTNDDVWALIASKDAPKTFEMLLPGMFEKLEIIEGDGGVGTVLLVVYPPGSVPLSNEEKFVTIDNHRRLKEILQTKGGYLDMGVTFYMESFQIFPRGHNSCVFKSMVRYEVPDKLAPNVSSLISVEGLLTMAKAAAKYVVDNNKIKSNY*
Papaver_armeniacum|Par_contig_200.1		MRKVIKYDMEVATSADSVWAVYSSPDIPRLLRDVLLPGVFEKLDVIEGNGGVGTVLDIAFPPGAVPRSYKEKFVNIDREKRLKEVIMIEGGYLDMGCTFYLDRIHVVEKSPSSCYAGAMSKLITTEPLKSMAEVISNYVIQNESFSARIILNKQSVVKKEIRYDLEVPTSADSIWSVYSCPDIPRLLRDVLLPGVFEKLDVIKGNGGVGTVLDIVFPPGAVPRSYKEKFVTIDREKRLKEVIMIEGGYLDMGCTFYLDRIHVVEKTPSSCVIESSIVYEVKEEYADAMSKLITTEPLKSMAEVISNYVIQKESFSAGNIFNKNSLVKKEIRYDLEVPTSADSIWSVYSCPDIPRLLRDVLLPGVFEKLDVIKGNGGVGTVLDIVFPPGAVPRRYKEKFV…
Papaver_armeniacum|Par_contig_346.1		MKGQLSKEVEAPVPASDLWDVYGTLELVRLIKELLPEILHDVGVDVGDGGVGTVLKITLAPGSPVTYYKEKFIEVDQEKRIKVVDVIEGGYLEAGFSLYRTTFEIIEKGDHSSVISTIDYELDDASADNVALVSIKPLEIVAETLGKYLKEKKIEHANV*
Papaver_armeniacum|Par_contig_748.7		MRYELNNEIDVPLSASSIWQVYACKELPKLIVKLLPEVFDRIDYISGDGGVGTVIRIVFPPVPRSYKEMFGKIDHAQRYLAMGVTSYVDKFKIISRGPNSCTIRSTTEYEVPDHLADKVKNLISIEGLVPMAKAIVEYVKEFGDYGQCLGNNLAHIALPVEGN*
Papaver_armeniacum|Par_contig_772.2		MRKVVRYDMEVATSADSIWAVYGSPDVSRLLRDVLLPGVFVKMDIIEGDGGVGTVLDVVFQPGAVPQSYKERFDTVDHEKRILEVSIIEGGYLEMGCTSYLNRMHVIEITSKSCVIKSSVVYDVKEECADAMSKLITTIQLESMAKVVADYVLKKQSASDTNIPKKQSLMRKEITYEMEVQTSADSIWDIYSSPDIPRLLRDVLLPG*
Papaver_armeniacum|Par_contig_874.3		MKYQIVFSVFLLFSSIYSAECLKYTLISDLDVVGASADEIWALFASNDAPKIFQQLLPGVFEKIEVLEGNGGVGSVLRITYPEGSVPLTNKEKFVTIDNRRRLKEVLQTEGGYLDMGVTFFMESFEIIPKNYKSCIIKSMVRYTVPDAAASNVSHLISIEGLLGMAKVAAKYVIDNKKIIAEY*
Papaver_armeniacum|Par_contig_1137.4		MVNYKLIAELEVAASADDVWDVLGAKNAPKFFKNSLPGVFEKLEVLEGDGGVGTFLLIKYPDGFSNKEKFVTVDHHRRLKEIWQTEGGYLGMGVTYYMEAFKVIECANSCIIQSIVEYKASEEVAAKVCNRISVEGLLNMAKIVAKHVLNKEKAPSAAAA*
Papaver_armeniacum|Par_contig_1137.5		MVNYKLIAELEVAASADDVWDVLGAKNAPEFFKNSLPGVFEKLEVLEGDGGVGTFLLIKYPDGFSNKEKFVTVDHHRRLKEILQTEGGYLGMGVTYYMEAFKVIECANSCIIQSIVEYKASEEVAAKVCNLISVEGLLNMAKIVAKHVLNKEKDPSTAAA*
Papaver_armeniacum|Par_contig_1137.8		MVNYKLIAELEVAASADDVWDVLGAKNAPEFFKNSLPGVFEKLEVLEGDGGVGTFLLIKYPDGFSNEEKFVTVDHHRRLKEILQTEGGYLGMGVTYYMEAFKVIECANSCIIQSIVEYKASEEVAAKVCNLISVEGLLKMAKIVAKHVLNKEKAPSTAAA*
Papaver_armeniacum|Par_contig_1172.15		MRYELTNEFDVNASADDVWEVYSSPNLPKLIVDLLPGMFERIDFVEGNGGVGTVLRLVYPPGTVPLTYKEKFVTIDKSKRLKEVQQVEGGYLDMGVSFYMDSFQIIEKVGCNSCTIKSTTKYEINDDELAKKVSPLISVDSLVNMARGISKYVLKKQNSRSSHKHQPKKKVHEHGHPSADEGKHVHARNRSFQG*
Papaver_armeniacum|Par_contig_1539.3		MRYELINEFDVGASADDVWAVYSSPDLPRLIVELLPGVFEKIDVVEGNGGLGTVLHLVYPHGSVPLSYKEKFITMDNHKRLKEVRQIEGGYLEMGCTFYMDSFQILKKTHDSCTIRSITKYEVSAELADKVSSHISVESLVDMARAISKYVIENNEKKKAEDPSTCSGEGHEKKHGHLHRIWISLFGK*
Papaver_armeniacum|Par_contig_2023.6		MRYELINEFDIAASADDVWAVYSSPYLPKLIIELLPGVFEKIDVVEGNGGLGTVLHLVYPHEKFITMDNPKRLKEVRQIEGRYLEMGCTSYMDSFQILRKTHGSCTIRSITKYEVSAEVAEKVSSHVSVDSLVVLARAISKYVMRNNEKKAGPSTCSEGRDESTQKHAHWGRIWLCSFGK*
Papaver_armeniacum|Par_contig_2368.2		MKNQVVLFICLLFSVHTGEPLKYTLIGELEVATPANDVWAFFASNNAPRMFVQLLPGVFERIEILEGNGGVGSVLRVVYPAGSVPLTNLEKFVTIDNRKRLKEILQTEGGYLDLGVTYFMESFQILRRGANSCTIKSMINYEVPDDLAANVSQLISIEGLINMAKVAAKYIIDNKSKAASVADM*
Papaver_armeniacum|Par_contig_3760.7		MKSDLLFVVFSFLFMLRKGNSMTYELINEIKVNASANDIWAVYSSPDLPKLINKFLPGATERIDYVKGNGGVGTILRIVFPPGSVPLSYKEKFITIDSRRLLKEVLHIEGGYLDMGVTFYMERFKIIKKSCNSCIIRSMIEYEVPDKLAANISPLISVDGFVTMATAISKYVLDNKKNGYIPCLAN*
Papaver_armeniacum|Par_contig_4024.11		MKYCKVLLLFCSFLFLMGKGNSMRYELINEMEVPASAEDIWAVYSSPNLSKLIVELLPDVFERIDYVKGTGGVGTIIQVVYSPGIIPRMLKEKFVTIDDHRRLKEVQQIGGGHIAMGVKFHMISFKIIKKGSYSCIIRSKIEYIVPDDLAAKIAPLINVEGLVGMARAITKYVLDNKRN*
Papaver_armeniacum|Par_contig_4837.1		MAESLKYTLISEFDVAAPADDVWALIASKDAPKTFQMLLPRMFDKLEIIEGDGGVGTVLLVVYPPGSVPLTNEEKFVTIDDHRRLKEILQTKGGYLDMGVTFYMESFQIVPKVYNSCVFKSMVRYEVPDELAPHVSSLISVEGLLTMAKAAAKYVVDNK*
Papaver_armeniacum|Par_contig_4839.21		MKSELVSMVFGFLILIGRVNSMRYELINEMKVNASANDIWAVYSSPDLPKLIVKLLPSVFKRIDYVQGNGGVGTILRIVYPPGSVPLTYKEKFITIDNRKLLKEVLQVEGGYLAMGVTFYMDSFKIIKTGRDSCIIRSITQYEVPDKLAAKISPLVSVDSLVSMATAISKYVLDNKKNGWIQSLG*
Papaver_armeniacum|Par_contig_4839.22		MKSELVFVVFSFMFLIGKGNSMRYELINEMKVNASANDIWAVYSSPDLPKLIVKLLPGVFERIDYVEGKGGVGTILRLVYPPGSVPLSYKEKFITIDNRRRLKEVLQIEGGYLAMGVTFYMDSFKIIKTGCDSCIIRSITQYEVPDNLAAKISPLVSVDSLVGMATAISKYVLDSKKNGYIVLAD*
Papaver_armeniacum|Par_contig_4966.1		MKYCKVLLLFCSFLFVLGKGNSMRYELINEMEVPASAEDIWAVYSSPNLPKLIVELLPNVFERIDYVKGTGGVGTIIQVVYSPGIVPRILKEKFVTIDDHKRLKQVQQIEGGQIAMGVKFHMISFKIIKKGSDSCIIKSKIEYIVPDDLAAKISPLINVEGLVGMARAITKYVLDNKRNS*
Papaver_armeniacum|Par_contig_5567.13		MKSDLLFVVFSFLFMLRKGNSMTYELINEIKVNASANDIWAVYSSPDLPKLINKFLPGATERIDYVKGNGGVGTILRIVFPPGSVPLSYKEKFITIDSRRLLKEVLHIEGGYLDMGVTFYMERFKIIKKSCNSCIIRSMIEYEVPDKLAANISPLISVDGFVTMATAISKYVLDNKKNGYIPCLAN*
Papaver_armeniacum|Par_contig_5917.1		MRYELINEFDVGASADDVWAVYSSPDLPRLIVELLPGVFEKIDVVEGNGGLGTVLHLVYPHGSVPLSYKEKFITMDNHKRLKEVRQIEGGYLEMGCTFYMDSFQILKKTHDSCTIRSITKYEVSAELADKVSSHISVESLVDMARAISKYVIENNEKKKAEDPSTCSGEGHEKKHGHLHRIWISLFGN*
Papaver_armeniacum|Par_contig_6428.8		MRYEFINEFEAHASADDVWGRVYGSLDYPKVVVQLLPTVLETKEILEGDGHDVGTVLRVVYLPGFVPRTYKEKIVTMDHKKRYKEVQMIEGGYLDMGFTFVMVIHEVLAKECNSCIIRSIVKCEVKDEFAANVSNIRNTFDGYVALARAVPEYIAKQHATSAAN*
Papaver_armeniacum|Par_contig_6428.13		MRYEFINEFEAHASADDVWGQVYGSPDYPKVVVQLLPTVVETKEVLQGDGHDVGTVLRVVYLPGFVPRTYKEKIVTMDHKKRYKEVQMIEGGYLDMGFTYVMVIHEVLAKECNSCIIRSIVKCEVKDEFAANVSNIRNTFDGYVALARAVPEYIAKQHATTSAAN*
Papaver_armeniacum|Par_contig_6428.15		MRYEFINEFEAHASADDVWGRVYGFLDYPKVVVQLLPTVLETKEILEGDGHDVGTVLRVVYLPGFVPRTYKEMIVTMDHKKRYKEVQMVEGGYLDMGFTYVMVIHEVLKSIVKCEVKDEFAANVSNIHNTFDGYVALARAVLEYIAKQHATTSTAN*
Papaver_armeniacum|Par_contig_6476.1		MAESLKYTLISEFDVAAPADDVWALIASKDAPKTFQMLLPRMFDKLEIIEGDGGVGTVLLVVYPPGSVPLTNEEKFVTIDDHRRLKEILQTKGGYLDMGVTFYMESFQIVPKVYNSCVFKSMVRYEVPDELAPHVSSLISVEGFLTMAKAAAKYVVDNK*
Papaver_armeniacum|Par_contig_6476.2		MAESLKYTLINELDVAAPADDVWALIASKDAPKTFEMLLPGMFEKLEIIEGDGGVGTVLLVVYPPGSVPLSNEEKFVTIDNHRRLKEILQTKGGYLDMGVTFYMESFQIFPRGHNSCVFKSMVRYEVPDELAHNVSSLISVEGLLTMAKAAAKYVVDNNKIKSNY*
Papaver_armeniacum|Par_contig_6725.1		MKSELVSMVFGFLILIGRVNSMRYELINEMKVNASANDIWAVYSSPDLPKLIVKLLPSVFKRIDYVQGNGGVGTILRIVYPPGSVPLTYKEKFITIDNRKRLKEVLQVEGGYLAMGVTFYMDSFKIIKTGRDSCIIRSITHVDSLVSMATAISKYVLDNKKNGYEALAN*
Papaver_armeniacum|Par_contig_7092.1		MRYELNNEIDVPLSASSIWQVYACKELPKLIVKLLHEVFDRIDYISGDGGVGTVIRIVFPPGEVPRSYKEMFGKIDHAQRLKEVQQISGGYLAMGVTSYVDKFKIISRGPNSCTIGSTMEYEMAKAIVEYVKEFGDYGQCMGNNLAHIAFLLKAIDDAPHYV*
Papaver_armeniacum|Par_contig_7185.2		MRYEFINEFEAHASADDVWGRVYGSPDYPKVVVQLLPTVVETKEVLQGDGHDVGTVLRVVYLPGFVPRTYKEKIVTMDHKKRYKEVQMIEGGYLDMGFTYVMVIHEVLAKECNSCIIRSIVKCEVKDEFAANVSNIRNTFDGYVALARAVPEYIAKQHATTSAAN*
Papaver_armeniacum|Par_contig_7408.2		MRYELINEMKVNASANNIWAVYSSPDLPKLIVKLLPGVFERIDYVEGKVVLVQFSVSYILQVRSVPLSYKEKFITIDNRRRLKEVLQIEGGYLAMGVTFYMDSFKIIKTGCDSCIIRSITQYEVPDNLAAKISPLVSVDSLVGMATAISKYVLDSKKNEYIVLAN*
Papaver_armeniacum|Par_contig_7408.3		MKSELVPMVFGFLILIGRVNSMRYELINEMKVNASANDIWAVYSSPDLPKLIVKLLPSVFKRIDYVEGNGGVGTILRIVYPPGSVPLTYKEKFITIDNRRLLKEVLQVEGGYLAMGVTFYMDSFKIIKTGRDSCIIRSITQYEVPDELAAKISPLVSVDSLVSMATAISKYVLDNKKNGYEALAN*
Papaver_armeniacum|Par_contig_7519.6		MVKYKLISEIDVAASADYLWPLLSSKEIPKLAKKLLPNKYEKVEVLEGDGGLGTVVHVVHPPGSVPLSYVQKIVTVDNCERFQEIQQIEGGYLDMGVTLFIESFQVIEKDGDSSVVKSMVRYEVPDELAPNVSHLITPEDLLTRMKAGIKYALSLKK*
Papaver_armeniacum|Par_contig_7745.12		MVNYKLIAELEVAASADDVWDVLGAKNAPEFFKNSLPGVFVKLEVLEGDGGVGTVLQIEYPDGFSNEEMFVTVDHHRRLKEILQTEGGYLGMGVTYYMEAFKVIECANSCIIQSIVEYKASEEVAAKVCNLISVEGLLNMAKIVAKHVLNKDKAPSTAAA*
Papaver_armeniacum|Par_contig_8294.7		MRKVIKYDMEVATSADSVWAVYSSPDIPRLLRDVLLPGVFEKLDVIQGNGGVGTVLDIAFPPGAVPRSYKEKFVNIDREKRLKEVIMIEGGYLDMGCTFYLDRIHVVEKSPSSCVIESSIVYDVKEEYAGAMSKLITTEPLKSMAEVISNYVIQNESFSARIILNKQSVVKKEIRYDLEVPTSADSIWSVYSCPDIPRLLRDVLLPGVFEKLDVIKGNGGVGTVLDIVFPPGAVPRRYKEKFVKINHEKRLKEVVMIEGGYLDMGCTFYMDRIHVLEKTPNSCVIESSIIYEVKEEYAAKMAKLITTEPLESMAEVISGYVLKKRLQVFGFEIKPKLRFNLLLCLIIFRYDMEVATSADSIWAVYGSPDVSRLLRDVLLPGVFVKMDIIEGDGGVGTVL…
Papaver_armeniacum|Par_contig_10039.3		MKYLIVFSILLLFSSIYSAESLKYKLISELDVEGASADEIWALFASNDAPKIFQQLLPGVFEKIEVLEGNGGVGSVLRITYPEGSVPLTNKEKFVTIDNRRRLKEVLQTEGGYLDMGVTFFMESFEIIPNNYKSCIIKSMVRYTVPDAAASNVSSLVSIEGLLGMAKVAAKYVIDNKKKIAEY*
Papaver_armeniacum|Par_contig_10039.5		MKYLIVFSILLLFSSIYSAESLKYKLISELDVEGASADEIWALFASNDAPKIFQQLLPGVFEKIEVLEGNGGVGSVLRITYPEGSLPLTNKEKFVTIDNRRRLKEVLQTEGGYLDMGVTFFMESFEIIPNNYKSCIIKSMVRYTVPDAAASNVSSLISIEGLLGMAKVAAKYVIDNKKIIAEY*
Papaver_armeniacum|Par_contig_10039.6		MKYQIVFPIFLLFSSIYNAECLKYTLISELDVVGASADEIWAVFASNDAPKIFQQLLPGVFEKIEVLEGNGGVGSILRITYPKGSVPLTNKEKFVTIDNRRRLKEVLQTEGGYLDMGVTYFMESFQITPKGFNSCIIKSMVRYEVPDAVASNVSPLISVEGLLGMARAAAKYVIDSKKKIAEY*
Papaver_armeniacum|Par_contig_12044.1		MKKVIRYDREVPTSADSVWAVYGSPDIPRLLRDVLLPDVFEKLDVIEGNGGVGTVLEVALHPGVVARSYKEKFETIDHEKRLMEVSVIEGGFLDMGCTSYLNKIHVVEKTSKSCVIKSSIIYEVKEECADEMSKLITTIQLESMADVISKYVLNKSVPKKQSLVRKEVTYETEVPSSADSVWDVYSSPDIPRLLRDVLLPGVFEKLHVIEGNGGVGTVLDIAFPLGAVLRSYKEKFVCINQEKRLKQVVMIEGGYLDMGCTFYMDRIHVLEKTPNSCVIESSIVYEVKEEYADKMSKLITTVTIEKKQFQVLLGLEVTPKLRSSLLLFLVVCFAIVGGMLIAAVPRY*
Papaver_armeniacum|Par_contig_12126.9		MRGHVTNEMDVVGASADEIWAVYGSKDLPRLIITLQPGVFEKIDIVEGDGGAGTVLHIVMAEGISGPHEWNEKFITLDNHTRVKQIQQIKGGYLDMGFSLHQVTYEIIGKDENSCIIRSTVKIELDDEFESNASSITVDSMWGMAKSIVKYVLDSKAEK*
Papaver_armeniacum|Par_contig_12309.1		MKYCKVLVLFCSFLFVLGKGNSMRYELINEMEVPASAEDIWAVYSSPNLPKLIVELLPNVFERIDYVKGTGGVGTIIQVVYSPGIVPRILKEKFVTIDDHKRLKQVQQIEGGHIAMGVKFHMISFKIIKKGSDSCIIKSKIEYIVPDDLAAKISPLINVEGLVGMARAITKYVLDNKRNS*
Papaver_armeniacum|Par_contig_13206.12		MRYELINEFDVNASADDVWEVYSSPNLPKLIVDLLPGTFERIDFVEGNGGVGTVLRLVYPPGTVPLTYKEKFVTIDKSKRLKEVQQIEGGYLDMGVSFYMDSFQIIEKVGCNSCTIKSTTKYEINDDELAKKVSPLISVDSLVNMARGISKYVLKKQNSRSSHKHQPKKKVHEHGHPSADEGKHVHARNRSFQG*
Papaver_armeniacum|Par_contig_14685.1		MKGQLSKEVEAPVPASDLWDVYGTLELVRLIKELLPEILHDVGVDVGDGGVGTVLKITLAPGSPVTYYKEKFIEVDQEKRIKVVDVVEGGYLEAGFILYRTTFEIIEKGDHSSVISTIDYELDDASADNAALVSIKPLEIVAETLGKYLKEKKIEHANV*
Papaver_armeniacum|Par_contig_15643.3		MKSGLVFVVFSFLFLIDNGNSMTYELINKMKVNASANDIWAVYSSPDLPKIIVKLLPDVFERIDYVKGNGGVGTIIRLVYPPGSVPLTYKEKFITIDNRRRLKEVPEIEGGYLDMGVTFYMDTYKIIKTSSNSCIIKSMIQYEVPDNLAAKISPLISVDGLVTMAKAISKYVLDNKKNGHMALAD*
Papaver_armeniacum|Par_contig_16365.1		MRYQFFFLIFLLFSSIYMAESLKYTLINELDVAAPADDVWALIASKDAPKTFEMLLPGMFEKLEIIEGDGGVGTVLLVVYPPGSVPLSNEEKFVTIDNHRRLKEILQTKGGYLDMGVTFYMESFQIVPKGYNSCVFKSMVRYEVPDELAHNVSSLISVEGLLTMAKAAAKYVVDNNKIKSNY*
Papaver_armeniacum|Par_contig_16442.1		MVSYKLIAELEVAASADDVWGVIGAKDAPQFFMNALPGMFEKIEILEGDGGVGTVLLIVYPEGSVPLTNEEKFVTMDDCKRLKEILQTKGGYLDMGVTYYMETFKIRECGNSCIIQSIVEYKAPEEVAAKVSSLISVEGLLVMAKIVAKHVLMPKASSIAA*
Papaver_armeniacum|Par_contig_17585.5		MKSDLLFVVFSFLFMLRKGNSMTYELINEIKVNASANDIWAVYSSPDLPKLINKFLPGATERIDYVKGNGGVGTILRIVFPPGSVPLSYKEKFITIDSRRLLKEVLHIEGGYLDMGVTFYMERFKIIKKSCNSCIIRSMIEYEVPDKLAANISPLISVDGFVTMATAISKYVLDNKKNGYIPCLAN*
Papaver_armeniacum|Par_contig_17949.2		MMKPAIFMVFLVFFLMGKGDSMRYELNNEIDVQLSASSIWQVYACKELPKLIVKLLPDVFDRIDYIEGNGGVGTVIRIVFPPGSVPRSYREMFRKIDHVHRVKEVQQISGGYLAMGVTSYVDKFKIISRGPNACTIRSTTEYEVPDHLADKVNNLISIEGLVPMAKAIVDYVKEFGDYGQCLGNNLAHIALPVEGN*
Papaver_armeniacum|Par_contig_17949.6		MMKPAIFVVFLVLFLMGKEADSMRYELNNEIDVPLSASSIWQVYACKELPKLIVKLLPDVFDRIDYIEGNGGVGTVVRIVFPPGSVPRSYKEMFRKIDHVHRVKEVEQISGGYLAMGVTSYVDKFKIIRRGPNSCTIRSTTEYEVPDHLADKVNQLISIEGLVPMAKAIVDYVKEYGDYGQCLGENDLAHIALPV*
Papaver_armeniacum|Par_contig_17949.8		MMKPAIFMVFFAFFLMGKEADSMRYELNNEIDVPLSASSIWQVYACKELPKLIVKLLPHVFDRIDYISGDGGVGTVIRIVFPPGEVPRSYKETFRKIDHAQRLKEVQQLSGGYLAMGVTSYVDKFKIISTGPNSCTIRSTTEYEVPDHLADKVKSLISIEGLVPMAKAIVEYVKEFGDYGQCLGTSANNADLAHIALPV*
Papaver_armeniacum|Par_contig_17949.30		MRKEIVFVLFLVFLMGKESNAMRYKLINEIDVDLSARSIWNVYSSKDLPSLIVKLLPEVFERIDILEGNGGVGTVCRIVFPPGSVPRTYKEMFTKIDHVHRLKVIQQISGGYLAMGVTSYTDMFKIISTGPNSCIIRSTTEYEVPDHLADKVNSLISIEGLVPMAHAIIKYVKEFGDQVNIDDSANIALPVGKDA*
Papaver_armeniacum|Par_contig_17949.36		MRGHVTNEMDVVGASADEIWAVYGSKDLPKLIVTLQPNVFEKIDYVEGDGGQGTILHIVMAQGIPGPREWREKFVKIDNCRRVKQLKQIQGGYLDMGFSLYKATYEILPKDKNSCIIRSTVQIDLDDKNFEANARPITVDSMWDMAKSIVQYVLDNKAKQ*
Papaver_armeniacum|Par_contig_18198.8		MKGQLSKEVEAPVPASDLWDVYCTLEFVRLIKELLPEILHDVGVDIGDGGVGTVLKITLAPGSPVTYYKEKFIEVDQEKRIKVVDVVEGGYLEAGFSLYRTTFKIIEKGDHSSVISTIDYELDDASADNAALVSIKPLEIVAETLGKYLKEKKIEHANV*
Papaver_armeniacum|Par_contig_18606.4		MKSGLVFVVFSFLFLIGNGNSMTYELINKMKVNASANDIWAVYSSPDLPKIIVKLLPNVFERIDYVKGNGGVGTIIRLVYPPGSVPLTYKEKFITIDNRRRYLDMGVTFYMDTYKIIKTGSDSCIIRSMVQYEVPDNLAAKISPLISVDGLVTMARAISKYVLDNKKNGHMALAD*
Papaver_armeniacum|Par_contig_18795.1		MRYELNNEIDVPLSASSIWQVYACKELPKLIVKLLPEVFDRIDYISGDGGVGTVIRIVFPPWEVPRSYKEMFRKIDHAQRLKEMQEIWGGYLAMGVTSYVDKFKIISRGPNSCTIRSTTEYEVLDHLADKVKNLISIEGLVPMAKAIVDYVKEFGDYGQCLGNNLAHIALPVEGN*
Papaver_armeniacum|Par_contig_18834.18		MRYEFINEFEAHASADDVWGQVYGSPDYPKVVVQLLPTVVETKEVLQGDGHDVGTVLRVVYLPGFVPRTYKEKIVTMDHKKRYKEVQMIEGGYLDMGFTFVMVIHEVLAKECNSCIIRSIVKCEVKDEFAANVSNIRNTFDGYVALARAVPEYIAKQHATTSAAN*
Papaver_armeniacum|Par_contig_18917.2		MVNYKLIAELEVAASADDVWDVLGAKNAPEFFRNSLPGVFVKLEVLEGDGGVDTVLHIEYPDGFSNKEKFVTVDHHRRLKEILQTERGYLGMGVTYYMEAFKVIECANSCIIQSIVEYKASEEVAAKVCNLISVEGLLKMAKIVAKHVLNKEKAPSTAAA*
Papaver_atlanticum|Pat_contig_7401.7		MKGQLSKEVEAPVPASDLWDVYGSLELVRLIKELLPEILHDVGVDVGDGGVGTVLKITLAPGSPVAFYKEKFIEVDHEKRIKVVDVVEGGYLEAGFSLYRTTFEIIEKGDHSSVISTIDYELDDASADNAALVSIKPLEIVAETLGKYLKEKKIDHANV*
Papaver_atlanticum|Pat_contig_7401.8		MKGKISKEVHVPVPASDLWAVYGTLELIRLIKKLLPEILRDFEVVVGDGGVGTVLKLTFPPDSPVTGYSEKFKKVDNDKRIKVTEVVEGGYLEVGFSLYRVTYEITEKGAHSSVIITIEYELDDAFADNASLVSIEPLEVIAKTIGKYLKEKKGDHANV*
Papaver_atlanticum|Pat_contig_26318.53		VVPRSYKEKFVNIDRVKRLKEVIMIEGGYLDMGCTFYLDRIHVVEKTPSSCVIESSIVYEVEEEYANAMSKLITTEPLKSMAEVISNYVIQKESVSARNIFNRQSVVKKEIRYDLEVPTSADSIWSVYSCPDIPRLLRDVLLPGVFEKLDVIEGNGGVGTVLDIVFPP
Papaver_bracteatum|Pbr_contig_159.3		MKGQLSKEVEAPVPASDLWDVYGSLEFVRLIKELLPEILHDVGVDVGDGGVGTVLKITLAPGSPVPYYKEKFIEIDEEKRIKVVDVVEGGYLEAGFSLYRTTFEIIEKGDHSSVISTIDYELDDASADNAAKVSIKPLEIVAETLGKYLKEKKLDHANV*
Papaver_bracteatum|Pbr_contig_561.47		MVSYKLIAELEVAASADNVWGVIGAKDAPQFFMNALPGMFEKIEILEGDGGVGTVLLIVYPEGSVPLTNEEKFVTMDDCKRLKEILQTKGGYLDMGVTYYMETFKIIECGNSCIIRSIVEYKAPEEVAAKVSSLISVEGLLFMAKIVAKHVLIAKASSSIAA*
Papaver_bracteatum|Pbr_contig_599.3		MRYEFANELEVNACADDVWAIFSGPNFPILTVQLLPDILKSKDILEGDGCSVGTIMSVVFHPEVSEQDLTGVQGEVDHKKRRKEIQAIEGGCLDMGCTFSILSFEILLAKERNSCVIRTVNKHEVIDDLVTTTVSNGHLHTYFDACVTLVRGVAKHIAEQNAIAR*
Papaver_bracteatum|Pbr_contig_599.5		MRYEFANELEVNACADDVWAIFSGPNFPILTVQLLPDILKSKDILEGDGCSVGTIMSVVFHPGLGLPVCKEKYVTVDHKKRRKEIQAIEGGCLDMGCTFSILSFEILLAKERNSCVIRTVNKHEVIDDLVTTTVSNVLNIFQHYFDACVTLVRGVAKHIAEQNAIAR*
Papaver_bracteatum|Pbr_contig_713.18		MRYEFINEIEVDASADDVWAIYSDPNFCKLVVQILSGILESKDVVEGDGRSVGSILRVVFLPGHVPRMYKEKFVTIDNQKRLKEIEMIEGGYLEMGFTFCMLSFEILAKESNLCVIRTITKYEINDEVATGVTAHLNNSLDTWVTLARGVSGHIAQQKAGSIAN*
Papaver_bracteatum|Pbr_contig_1000.7		MKYEIVFMVFGCLLLIGKGSSMKYTLINEMHVAASAQDVWAAYGSPGFPMLVAKLVPSVKIDIIQGNGGVGSVLDVVFPPGSVPLTLKEKIVVIDHHKRLKQVLQIEGGYLSMGVTFYMSIYEILKRGSDSCIIRSTITYRVPDVLAAKITPLINVDSLVGLGRVVSKYIIDHRK*
Papaver_bracteatum|Pbr_contig_1553.11		MRYEFINEFEVDHASAADVWAIYSSPNIPTLTVQLVPNVLKSKDILEGDGHNVGTVLRVVLLPGHGLPVCKEKYVTVDHEKRFKEIQTIEGGYLELGCTFSMLSFEILAKERNSCIIKTVTKYEISDDLATAVSGHLHTYLDTCVTIARGVSKHIAEQSARADN*
Papaver_bracteatum|Pbr_contig_1553.13		MRYEFINEFEAHASADEVWGRVYGSLDYPKVVVQLLPTVLETKEILEGDGHDVGTVLRVVYLPGFVPRTYKEKIVTMDHEKRYKEVQMIEGGYLDMGFTFVMVIHEVLAKECNSCIIRSIVKCEVKDEFAANVSNIRNTFDGYVALARAVPEYIAKQHA*
Papaver_bracteatum|Pbr_contig_2124.1		MKYQIALSTFLLFSSIYMAESLKYTLISELDVAAPADDVWALIASKDAPKTFEMLLPGMFEKLEIIEGDGGVGTVLLVVYPPGSVPLSNEEKFVTIDNHRRLKEILQTKGGYLDMGVTFYMESFQIFPRGHNSCVFKSMVRYEVPDELAPNVSSLISVEGLLTMAKAAAKYVVDNNKIKSNY*
Papaver_bracteatum|Pbr_contig_2124.2		MKYQIVLSAFLLFSSIYMAESLKYTLISELDVAAPADDVWALIASKDAPKTFEMLLPGMFEKLEIIEGDGGVGTVLLVVYPPGSVPLSNQEKFVTIDNHRRLKEILQTKGGYLDMGVTFYMESFQIFPRGHNSCVFKSMVRYEVPDELAPNVSSLISVEGLLTMAKAAAKYVVDNNKIKSNY*
Papaver_bracteatum|Pbr_contig_2124.4		MKYQLVFSIFLLFSSIYSAECLKYTLISELDVVGASADEIWAVFASNDAPQIFQQLLPGVFEKIEVLEGNGGVGSVLRITYPKGSVPLTNLEKFVTIDNRRRLKEVLQTEGGYLDMGVTYFMESFQITPRGYNSCIIKSMVRYEVPDAVASNVSPLISVEGLLGMARVAAKYVIDNKKKIAEY*
Papaver_bracteatum|Pbr_contig_2124.5		MKSQLVFSIFLLFSSIYSAESLKYTLISELDVVGASADEIWALFASNDAPQIFQQLLPGVFEKIEVLEGNGGVGSVLRITYPKGSVPLTNKEKFVTIDNRRRLKEVLQTEGGYLDMGVTFFMESFEIIPKNYKSCIIKSMVRYTVPEAVASNVSSLISIEGLLGMAKVAAKYVIDNKKKIAEY*
Papaver_bracteatum|Pbr_contig_2812.27		MKKVIRYDLEVPTSADSIWEVYGSPDIPRLLRDVLLPDVFEKLDVIEGDGGVGTILEVVLHPGVVARSYKERFETIDHEKRLMEVSVIEGGYLDMGCTFYLNRIHVVEKTSKSCVIKSSIIYEVKEECADEMSKLITTIQLESMADVISKYVLKKQSNSHRNIPKKQSLVRKEVTYEMEVPSSADSVWDVYSSPDIPRLIRDVLFPGVFEKLHVIEGNGGVGTVLDIALPLGSVLRSYKEKFVSINQEKRLKQVVMIEGGYLDMGCTFYMDRIHVLEQTPNSCVIESSIVYEVKEEYADKMSKLITNVPLKCMAEVISIYVLKKKHFQVLGLEVTPKLRLSLLLFLVVCFAIVGGMLIAVVPL*
Papaver_bracteatum|Pbr_contig_2812.28		MKKVIRYDLEVPTSADSIWEVYGSPDIPRLLRDVLLPDVFEKLDVIEGDGGVGTILEVVLHPGVVARSYKERFETIDHEKRLMEVSVIEGGYLDMGCTFYLNRIHVVEKTSKSCVIKSSIIYEVKEECADEMSKLITTIQLESMADVISKYVLKKQSDSHRNIPKKQSLIKKEVTYEMEVPSSADSVWDVYSSPDIPRLLRDVLLPGVFEKLHVIEGNGGVGTVLDISLPLGSVLRSYKEKFVSINQEKRLKQVVMIEGGYLDMGCTFYMDRIHVLEKTPNSCVIESSIVYEVKEEYADKMSKLITNVPLKCMAEVISIYVLKKKHFQVLGLEVTPKLRLSLLLFLVLCFAIVGGMLIAAVPL*
Papaver_bracteatum|Pbr_contig_2949.38		MDSRGISNIPTLLFCSFLFVMGKGNSMRYELINEMEVGASAEDIWAVYSSPDLPRIIVELLPNVFERINYVKGTGGVGTIIQVVYSAEVQQIEGHIAMGVKFHMISFKIIKKGSYSCIIRSKIEYIVPDDLAAKIAPLINVKGLVGMARAITKYVLDNKRNS*
Papaver_bracteatum|Pbr_contig_3004.4		MMKPAIFVVVFMFVLMGKGADSMRYELNNEIDVPLSARSIWQVYACKELPKLIVKLLPEVFDRIDYIEGNGGVGTVIRIVFPPGEVPRSYKEMFRKIDHVHRLKEVQQISGGYLAMGVTSYVDKFKIISRGPNSCTIRSTTEYEVPDHLADNVKNLISIEGLVPMAKAIVEYVKEFGDYGQCLGENGLAHIALPV*
Papaver_bracteatum|Pbr_contig_3004.5		MMKPAIFVVVFMFVLMGKGADSMRYELNNEIDVPLSASSIWQVYACKELPKLIVKLLPEVFDRIDYIEGNGGVGTVIRIVFPPGEVPRSYKEMFRKIDHVHRLKEVQQISGGYLAMGVTSYVDKFKIISRGPNSCTIRSTTEYEVPDHLADKVKNLISIEGLVPMAKAIVEYVKEFGDYGQCLGGNDLAHIALPV*
Papaver_bracteatum|Pbr_contig_3004.6		MKPVIFVVVFAFILMGNGADSMRYELNNEIDVPLSASSIWGVYACKELPKLIVKLLPEVFDRIDYIEGNGGVGTVIRIVFPPGEVPRSYKEMFRKIDHVHRLKEVEQISGGYLAMGVTSYVDKFKIIRTGPNSCTIRSTTEYEVPDHLADKVKSLISIEGLVPMAKAIVEYVKEFGDYGQCLGNNLAHISLPEGN*
Papaver_bracteatum|Pbr_contig_3280.22		MRYELINEFDVGASADDVWAVYSSPDLPKLIVELLPGVFEKIDVVEGNGGLGTVLHLVYPHGSVPLSYKEKFITMDNHKRLKEVRQIEGGYLEMGCTFYMDSFQILKKTHDSCTIRSITKYEVSAELAEKVSSHISVESLVDMARAISKYVIEKNEKKKAEDPSTCSEEGHEKRHGHLHRIWNSLFGK*
Papaver_bracteatum|Pbr_contig_3280.23		MKYQVGLSIFLLFLIGAGESSKYTLVNDFNVAASADEVWAVYSSHNLPKLIVKLLPGMFKRIDVLKGDGGVGTILRLVYPPGSVPLTYKEKFVTIDNHRRLKEVLQIEGGYLEMGVTFYMDSFQVIKRGRDSCIIRSITKYEIRDDLAVKVSPLISVDSLVTMARAISKYVLENKKKANSTIVP*
Papaver_bracteatum|Pbr_contig_3506.15		MKSELINEIKVNASSNDIWEVYSSPDLLKFMIKLLPDAIERIDYVEGNGGVGTILQVGLTKISNIDNGRRFKEVQQIDGGYLAMGVTFFMERFEIIETSCNSCIIRSMIEYEVPAELAAKISPLISIDGFASMATIISNYVLDNKKNGYMAFDN*
Papaver_bracteatum|Pbr_contig_3634.7		MRYRLVNELEVAASANDVWALFASNDAPKLFVQLLPGVFERIEILEGDGGEGSILRIVYPAGSVPLTNLEKFVTIDNRRRLKEVLQTEGGYLDMGVTYFMESFQIITKGANSCIIKSMINYEVPDDLAANVSELISIEGLINMAKVAAKYVIDNKNKASSVADM*
Papaver_bracteatum|Pbr_contig_3634.8		MKNQVVFFFCVFFLAHTGESMRYRLINELEVAASANDVWAPFASNDSPKFFQQRLPGVFEKIEILEGDGGEGSILRIVYHPGSVPLTNLEKFVTIDNRRRLKQVLQTEGGYLAMGVTYYMESFQIIRKGADSCIIKSMINYEVPDDLAANVSELISVEVLIKMAKVVAKYAIDNNNKASSVACM*
Papaver_bracteatum|Pbr_contig_3634.9		MKNQVVFFFCVFFLAHTGESMRYRLINELEVAASANDVWAPFASNDSPKFFQQRLPGVFEKIEILEGDGGEGSILRIVYHPGSVPLTNLEKFVTIDNRRRLKQVLQTEGGYLAMGVTYYMESFQIIRKGADSCIIKSMINYEVPDDLAANVSELISVEVLIKMAKVVAKYAIDNNNKASSVACM*
Papaver_bracteatum|Pbr_contig_3634.10		MKNQVVLFVCLLFLVHTGESLKYTLIGELEVATSANDVWAFFASNDAPRMFVQLLPGVFERIDILEGNGGVGSVLRVLYPAGSVPLTNLEKFVTIDNRRRLKEILQTEGGYLDLGVTYFMESFQIIRRGANSCTVKSMINYEVPDDLAANVNPLISIEGLINMAKVAAKYVIDNKSKAASLTDM*
Papaver_bracteatum|Pbr_contig_3971.53		MKSELVIIVFGFLILIGRVNSMRYELINEMKVNASANDIWAVYSSPDLPKLIVKLLPSVFERIDYVEGNGGLGTILRIVYPPGSVPLTYKEKFITIDNRKLLKEVLQVQGGYLAMGVTFYMDSFKIIKTGSDSCIIRSITQYEVPDELAAKISPLVSVDSLVSMATAISNYVLDNKKNGYKALAN*
Papaver_bracteatum|Pbr_contig_3971.54		MKSELVFVVFSFLFLIGKGNSLRYELINEMKVNASANDIWAVYSSPDLPKLIVKLLPGVFERIDYVEGNGGVGTILRLVYPPGSVPLSYKEKFITIDNRKRLKEVLQIEGGYLAMGVTFYMDSFKIIKTGCDSCIIRSITQYEVPDNLAAKISPLVSVDSLVGMATAISKYVLDSKKNGYIVLAN*
Papaver_bracteatum|Pbr_contig_4071.20		MLRKVVRYDAEVATSADSIWEVYGSPDVSRLLRDVLLPGVFVKMDIIEGNGGVGTVLDVVFQPGAVPQSYKERFDTVDHAKRILEVSIIEGGYLEMGCTSYLNRMHVIEITSKSCVIKSSVIYDVKEECADAISKLITTIQLESMAKVVADYVLKKQSASDTNIPKKQSLMRKEITHEMEVQTSADSIWDIYSSPDIPRLLSDVLLPGAFQKLHVIQGNGGVGTLLDIALPLGAVPRSYKEKFVKINHEKRLKEAVMIEGGYLDMGCTFYMHMIHVLEKTPKSCVIESSIVYEVKEEYADKMSKLITTEPLQSMAEAISSYVLKKQFQIFGLEVKPKLGLSLFLCLIVFWAIVGGFLIGGLKA*
Papaver_bracteatum|Pbr_contig_4071.21		MMRKVIKYDMEVAASADSVWAVYSSPDIPRLLRDVLLPGVFEKLDVIEGNGGVGTVLDIAFPPGAIPRSYKEKFINIDRVKRLKEVIMIEGGYLDMGCTFYLDRIHVVEKTPSSCVIESSIVYEVEEEYADVMSKLITTEPLKSMAEVISNYVIQKESISARNILNKNSLVKKEIRYNLEVPTSADSIWAVYSNPDIPRLLRDVLLPGVFEKLDVIEGNGGVGTVLDIVFPPGAVPRRYKEKFVNINHQKRLKEVIMIEGGYLDMGCTFYLDRIHVVEKTPSSCVIESSIVYEVKQECAEAISKLITTEPLKSMAEVISNYVLKKQSVSDTNIPKKQSVLRKEITYETEVQTSADSIWNVYSSPDIPRLLRDVLLPGVFEKLDVIAGNGGVGTVLDIAF…
Papaver_bracteatum|Pbr_contig_4236.10		MRGHVTNEMDVVGASADEIWAVYGSKDLPRLIITLQPGVFEKIDIVEGDGGAGTVLHIVMAEGISGPHEWNEKFITLDNHTRVKQIQQIKGGYLDMGFTLHQVTYEIIEKDENSCIIRSTVKIELDDEFESNASSITVDSMWGMAKSIVKYVLDSKAGK*
Papaver_bracteatum|Pbr_contig_4265.1		MKYQIVFSTFLLFLSIYMAESLKYTFISELDVAAPADDVWALIASKDAPKTFKMLLPGIFEKLEIIEGDGGVGTVLLVVYPPGSVPLSNEEKFVTIDKRKRLKEILQTKGGYLDMGVTFYMESFQIFPRGHNSCVFKSMVRYEVPDKVAHNVSSLIGVEGLLTMAKAAAKYVVDDNKIKSNY*
Papaver_bracteatum|Pbr_contig_4303.34		MVKYMLSSELEVAAPAEFVWAVFSSKEVPKLVPKLLPNAFEKVEILEGDGGLGTVIDIVFPQGHVPLSYKEKIVTVDNQERLKETQQIEGGYLDMGVTFFIESFQMIEKDADSCIIKSTVRYEVPDDLAPNVSHLISAEHLLTMAKVGAKYALSLRK*
Papaver_bracteatum|Pbr_contig_4317.4		MRKETVFVLFLVFLMGKESSAMRYKLINEIDVDLSAGSIWKVYSSKDLPSLIVKLLPEVFDRIDILEGNGGVGTVCRIVFPPGSVPRSYKEMFTKIDHVHRLKEVTQISGGYLAMGVTFYMDSFKIISTGPNSCIIRSITDYEVPDHLADKVNSLISIEGLVPMAHAIIKYVKEFGDQVNIGDSVNIALPVGNDA*
Papaver_bracteatum|Pbr_contig_4384.1		MKPIVLVVFFVFFLIGKGDAGRYELINQIDVPLSSSSIWNVYSSIDLPKLIVKLLPNVFDRIEYISGNGSVGTIVRVVLTPGSTPQMYKEIYRTIDHVRHVKEVQQISGGYLAMGVTSYVDKTKIIERGPNSCTIISTTEYEVPYHLADKVNSLIIEGLVPVAKAIAKYVLEFGDIHRGVQSEYGVVAADDGRCSDIGRDMLMKGGHAVDAAVATCLCLGVVYPMSSGIGGGAFMVVRDSATSKAKAFNSRETAPKFAYEDMYKNNIAWKSKGASSMGVPGEIAGLHEAWSIYGKLNWSDLFQPAIKLARDGFVVSHFLGLGINKSREMFESDPAGLGKMFMPNGRLLQAGDTSYNRKLAETLETLAKEGPSALYNGDLGKNFVKDVQDAGGIVTEEDL…
Papaver_bracteatum|Pbr_contig_4384.2		MMKAAIFMMVFVFFLMGKGADSMRYELNNEIDVPLSASSIWGVYACKELPKLIVKLLPHVFDRIDYISGDGGVGTVIRIIFPPGEVPRSYKETFRKIDHAQRLKEVQQLSGGYLAMGVTSYVDKFKIISTGPNSCTIRSTTEYEVPDHLADKVKSLISIEGLVPMAKAIVDYVKEFGDYGQCLGTSANADLVHIALPV*
Papaver_bracteatum|Pbr_contig_4469.1		MNVTLTSEFDVEAPAEDVWDLIGSKDSHKTFQMLVPGMFEKLQILEGDGGIGTVLLVVFSPGTHVYVNSEEKYVTIDNNRRFWEISQIKGGYLDMGVTSFMESFEIIPKGCNCVFKMMIRYQVPDELAHKVSSLVSIEGLVTIAKAAAKYVVDSSKKSPNYNTDKYEL*
Papaver_bracteatum|Pbr_contig_4613.8		MTYELINEMKVNASSNDIWAVYSSPDLPKLINKLLPGAIERIDYVEGNGGVGTILHIVFPPGSVPLSYKEKFITIDSRRLLKEVLHIEGGYLAMGVTFYVERFKIIKTSCNSCIIKSLIEYEVPDKLAAKISPLISIDGFVTMATSISKYVLDNKKNGYIPCFNQQ*
Papaver_bracteatum|Pbr_contig_4665.24		MAASAHDVWAVYSSSDLPKLIVELLPDVFEKIEIVEGNGGLGTVLHLVYPHVITMDNQKRLKEVRQIEGGYLEMGCTFYMDSFQILKKTNDSCTIRSITKYEVSAELAEKVSSHVSVESLVVLASAISKYIIRNNEKKAGPSTCSEGHDESTKKHAHLRGVWLCLYGK*
Papaver_bracteatum|Pbr_contig_4887.1		MNSTLTSEFYVAAPAEDLWDVISAKDSYKTIQMLVPGMFEKLEILEGDGGTGTVLAVVFSPGTHFYVNSEEKVTIDNQRRVWEILQIKGGYLDMGVTSFMESFEIIPKGRNSVYKTMIRYEVPDELAHKVSSLITIEGMLTMAKATAKYVVDSSKKSPNYPYIDNADKYEL*
Papaver_bracteatum|Pbr_contig_4940.1		MRYEFTNEFEVDHASADDVWAIYTAPNFPTLSAQLLSGLLKSKDIVEGDGCSVGTIFSVVFLPGCVVPMHKEKIVTVNHEKRLKEIQMIEGGYLEMGCTFCMLSFEILVKERNSCIIKTVTKYEINDDLASGVSCHFHTGFDMLVALARQVSKHITDKNATAAN*
Papaver_bracteatum|Pbr_contig_5258.4		MRYKLINEFDVNASAVDVWEVYSSPNLPKLIVDLLPGTFERIDIVEGNGGVGTVLRLVFPPGTVPLTYKEKIVTIDNSKRLKEVRQIEGGYLDMGVSFYMDSFQIIEKVGYNSCTIKSTTKYEINDDELAKKVSPLISVDSLVNMARGISKYVLKKQNSQPKKEVHEHGHPSADEGKHVHGRNRSFQS*
Papaver_californicum|Pca_contig_522.40		MRKEIVFMVFFVFFLMGKGDSMRYKLINEIDVELSARSIWKVYSSKDLPSLIVKLLPEVFDRIDVLEGNGGVGTVCRIVFPPGSVPRSYKEMFTKIDHVHRLKEVTQISGGYLAMGVTFYMDSFKIISTGPNSCIIRSITDYEVPDHLADKVNTLISIEGLVPMAKAIIKYVQEFGDQVNIADDSANITLPVGNDA*
Papaver_californicum|Pca_contig_522.49		MMKPVIFVVFFVLFLMGKGADSMRYELNNEIDVPLSASSIWKVYSCKELPKLIVKLLPQVFDRIDYISGDGGVGTVIRIVFPPGEVPRMYREMFRKIDHVNRLKEVQQISGGYLAMGVTSYVDKFKIISTGPNSCTIRSTTEYEVPDNLADKVNKLISIEGLVPMAHAIVDYVKEFGDYGQCLGNDLAHIALPV*
Papaver_californicum|Pca_contig_898.14		MMKVIRYDTEVATSADSVWAVYSSPDIPRLLRGVLLPGVFEKLDVIQGNGGVGTVLDIVFPPGAVPRSYKEKFINIDLEKRLKEVIMVEGGYLDMGCTFYLDRIHVPAKTPESCIIESSIVYEVKEECVDAISKLITTEPLKSMADVISNYVTQKESVSARSTLPSQPLVKKEIRYDLEVPTSADSIWAVYNTPNIPRLLRDVLLPGVFEKLDVIEGDGGAGTVLDIVFPPGAVPRSYKEKFVNINHEKRLKEVIMIEGGYLDMRSIKRSDYDRRRNLDIGCTFYLDRIHVIEKTSKSCVIKSSVVYEVKEEKADAISKLTTTEPLKSMAEVISNYAIKHQAVFGKNIPKKQSLVKKEIRYDVEVPTSADSIWAVYSTPDIPRLLRDVLLPGVFEKLDV…
Papaver_californicum|Pca_contig_941.132		MNYYKVLLLLCSFLFVMGKGNSMRYVLINEMEVAASAEDIWAVYSSPHLTKLIVELLPDVFERIDYVQGTGGVGTIIQVVYPPGSVPRTLKEKFVIIDDHRRLKQVQQIEGGNIAMGVKFHMISFKIIKKGYDSCIIRSKIEYIVPDILAAKISPFINVEGLVGMARAISKYVLDNKGNY*
Papaver_californicum|Pca_contig_956.1		MRYEFINEFDVNTSADDVWEIYSSPNFPALTVKLLPNILKSEDILEGDGGSVRTILRHSSLPMCREKIVTVDHEKRLKEIQTIEGGYLEMGCTFSMLSFEILVKERNSCIIKTVTKYEINDDLATTISGHLHTYLNGCVTIAQGVSKLIAAKNAGAAK*
Papaver_californicum|Pca_contig_956.4		MRYEFINELRVNACADDVWAIYSSPNFPALTVKLLPNVLKSKDILEGDGCSVGTIMRLVLHAGLGLSMCKEKIVTVDHEKRLKEIQTIEGGYLEMGCTFSMLSFEILVKERNSCIIKTVTKYEINDDLATTISGHLHTYLNGCVTIAQGVSKLIAERNTRAAN*
Papaver_californicum|Pca_contig_2760.18		MKGQLSKEVEVPVPASDLWDVYGTLELIRLIKKLLPEILRDFEIVVGDGGVGTVLKLTFPPESPVTDYKEKFTKVDHEKRIKVVEVVEGGYLEVGFSLYQATFEIIEKGGRSSVILTIEYELDDAYADNVSLVSTKPLEVIAETIGTYIKEKKANHANI*
Papaver_californicum|Pca_contig_5130.56		MKYELVFVMFSFLFLIGKQGNAMTYELINEMAVNASANDIWAVYSSRDLPKLIVKLLPGVFERIDYVKGNGGLGTILRLVYPPGSKPLTYKEEFVTIDHRKRLKEVLQIEGGYLAMGATFYMDSFKIIKTGRDSCIIRSVTQFEVPDNLYTEVSPYVSVDGLVSMATAISKYVLDNNSMKNGYIELVN*
Papaver_californicum|Pca_contig_5130.78		MKSELAFIVVGFLFLIGRGDSMRYELINEMKVNASVNDIWEVYSSPDLPKLIVKLLPSVFERIDYVEGNGGVGTILHIVYPPGSVPLTYKEKFITIDNRRRLKEVLQVEGGYLAMGVTFYMDSFKIIKTGRDSCIIRSITQYEVPDSLAAKISPLVSVDSLVSMATAISKYVLGNKKNGYTA*
Papaver_californicum|Pca_contig_5130.79		MKYELVFVMFSFLFLIGKQGNAMTYELINEMAVNASANDIWAVYSSRDLPKLIVKLLPGVFERIDYVKGNGGLGTILRLVYPPGSKPLTYKEEFVTIDHRKRLKEVLQIEGGYLAMGATFYMDSFKIIKTGRDSCIIRSVTQFEVPDNLYTEVSPYVSVDGLVSMATAISKYVIDNNSMKNGYIELVN*
Papaver_californicum|Pca_contig_6791.51		MKSQIVFSIFPLFLASIYTSYAVGESLNYTRNELGVAGLGASLRYTLINDLHVAGASANEIWALFASNYAPHIFFKILPGNGGVGSLLRIVYPKRSIPRSNKEIFMTIDNRRPLKEVLQTEGGYLAMGVTFLMESFQIFPEGRKSCIIRSMVRYTVSDQFAPDVTPLISVEGLVSMAKAAAKYVIDHKKKLVADY*
Papaver_californicum|Pca_contig_7745.37		MKNQVVFFICLLFLVHTGESLKYTLVGELEVAASANDVWAFFASNDAPKLFVQLLPGVFERIDILEGSGGVGSILRVVYPAGSVPLTNLEKFVTIDNRRRLKEILQTEGGYLDMGVTYFMESFQITRKGANSCIIKSMINYEVPDDLAANVSHLISIGGLINMAKVAAKYIIDNKSKASSVADM*
Papaver_californicum|Pca_contig_7745.119		MRYELINEFDVAASADDIWAVYSSPDLPKLIVELLPGVFEKIDVVEGNGGLGTVLHLVYPHGSVPLSYKEKFITMDNHKRLKEVRQIEGGYLEMGCTFYMDSFQILKKTYDSCTIRSITKYEVSSELAEKVSSHISVESLVDMARAISKYVIENNEKKKAENPSICSEEGHDKKHGHLHRIWLSLFGK*
Papaver_californicum|Pca_contig_7852.60		MRYELMNEFDVNASADDVWEVYSSPNLPKLLVNLLPGMFQRIDFVEGTGGLGTVLRLVYPPGTVPLTYKEKFVTIDKSRRLKEVQQVEGGYLDMGVTFYMDSFEIIEKVGCDSCTIKSITKYEINDDEFAKKVSSHISVDSLVNMARGIFKYVLKKHNG*
Papaver_californicum|Pca_contig_11394.35		MKNQIVFSIFLLFASIFSAESLKYTLINDLDVVWASADEIWTLFASNDAPQIFLRLLPGVFEKIEVLEGNGGVGSILHITYPEGSVPLTNKEKFMTIDNRRRLKEVLQTEGGYLAMGVTFFMESFQITPKGYNSCIIRSMVRYRVPYVVASKVSYLISVEGLLDMAKVAAKYVIDNKKKITYH*
Papaver_californicum|Pca_contig_11480.15		MRKEIKYDMEVATSADSVWAVYSSPDIPRLLRDVLLPGVFEKLDVIEGNGGVGTVLDIVFPPGAVPRRYKEKFVNINLEKRLKEVIMIEGGYLDMGCTFYLDRIHVVEKTPNSCVIESSIVYEVKEEYADAMEKLITTEPLKSMAEVISNYVIQKESTRNILNKQSLVKKEIRYDLEVPTSADSIWSVYSSPDIPRLLRDVLLPGVFEKLDVIEGNGGVGTVLDIVFPPGAVPRRYKEKFVNINREKRLKEVIMIEGGYLDMGCTFYLDRIHVIEKTSKSCVIKSSVVYEVTQECADAMSKLITTEPLKSMAEVISNYAIKQQSVSDRNIPKKQSLIRKEITYETEVQTSADSIWDVYSSPDIPRLLRDVLLPGVFEKLDVIAGNGGVGTVLDIAFPLG…
Papaver_californicum|Pca_contig_14683.72		MKKVIRYDTEVAISADSIWAVYSSPDIPRLLRDVLLPGVLEKLDVIQGNGGICTVLDIVVLYQYHKVVHSAVPRSYKEKFINIDHEKRLKEEITVEGGYLDMGCTFYLDKNFAGSGVCEMYGAVPRSYKEKFVNINHEKRLKEVIMIEGGYLDMGCTFYLDRIHVIEKTSKSCVIKSSVVCELKEESANVMSKLITTEPLKFMAEVISNYAIKHQAVFGRNIPKKQSLVKKEIRYDVELPTSVDSIWEVYSSPDILRLLRDVLLPGVFEKLDVIEEDGGVGTVLDIVSPPGVVPRYKEKFVNINHEKRLKEVILIEGGYLDMGYTLYLDRIHVIEKTSKSCVIKSSVVYEVKKACADAISKLITTEP*
Papaver_californicum|Pca_contig_14852.2		MKSGPVFVILSFLFLIGKGNSMTYELINEMKVNVSANDIWEVYSSPDLPKIIVKLLPTVFKRIDYVKGNGGVGTIIRLVYPPGSVPLTYKEKFITIDNRRRLKEVPEIEGGYLDMGVTFYMDTYKIIKTSNDSCIIRSMVHYDVPDNLAAKISPLISVDGLVTMATAISKYVLDNKKNGHTGLG*
Papaver_californicum|Pca_contig_14852.68		MKSQIVFSIFLLFLASINTSYATGESLNCTLINELGVAAGASLRYTLINDLNVAGASANEIWALFILPGVFEKIEILRGNGGVGSLLRIVYPEKSIPRWNKEIFVTIDNRRRLKEVLQSEGGYLAMGVTFFMESFQIFPKGHNSCIIRSMVRYTVPDQFAPDVTPLINVEGLVRMAKAATKYVIHHKKKLVADY*
Papaver_californicum|Pca_contig_18298.17		MKYELINEFVVAVSADDIWAVYSSPDLPKLIVELLPGVFEKIDVVEGSLPLSYKEKFITMDNHKRLKEVRQIEGGYLEMGCTFYMDSFQILKKTYDSCTIRSITEYEVSAELAEKVSSHISVESLVDMARAISKYVIKNNEKKKAENPSTCSEEGHDKKHGHLHRIWLSLFGK*
Papaver_californicum|Pca_contig_20092.55		MKGQLSKEVEVPVPASDIWDVYGTIELVKLIKELLPAILHDVEVDVGDGGVGTVLKLTLPPGSPVIYYKEKFMVVDHEKRIKVADVVEGGYLEAGFSLYRTTFEIIEKDGHSSVISTIEYELDDASADNAALVSIKPLEVVAETIGSYLKEKKIDNANV*
Papaver_californicum|Pca_contig_21030.211		MRYELINEFDVNASADEVWKVYSSHNLPKLIVDLLPGTFERIDFVEGNGGVGTVLRIVYPPGSVPLTYKEKFVTIDNSKRLKEVQQVEGGYLDMGVTFYMDSFQIVEKVGCHSCTIKSITKYEINDDELAKKISPLISVDSLVNMARAISKYVLKKHDG*
Papaver_californicum|Pca_contig_22191.45		MRGHVTNEMDVVGASADEIWAVYGSKDLPKLIITLQPGVFEKIDYIEGDGGQGTILHIVMAQGIPGPHEWREKFITIDNCRRVKQLQQVQGGYLDLGFSLYKVTYEILPKDKNSCIIRSTVQIDLDDKNFEANARLITVDSMWGMAKSIVKYVLDNKAK*
Papaver_californicum|Pca_contig_22191.48		MRKQIVFVVFFVLFLMGKGDSMRYKLINEIDVELSARSIWKVYSSKDLPSLIVKLLPEVFDRIDVLEGNGGVGTVCRIVFPPGSVPRSYKEMFTKIDHVHRLKEVTQISGGYLAMGVTFYMDSFKIISTGPNSCIIRSITDYEVPDHLADKVNTLISIEGLVPMAKAIVKYVQEFGDQLNIDDDSANIVLPVGNDA*
Papaver_californicum|Pca_contig_22191.57		MMKAAIFVVFFVLFLMGKGADSMRYELNNEIDVPLSASSIWKVYSCKELPKLIVKLLPEVFDRIDYISGDGGVGTVIRIVFPPGEVPRMYREMFRKIDHVHRVKEVQQISGGYLAMGVTSYVDKFKIISTGPNSCTIRSTTEYEVPDNLADKVNKLISIEGLVPMAKAIIEYVKEFGDYGQCLGNDLAHIALPVNVEGN*
Papaver_californicum|Pca_contig_27549.190		MKNQVVFFICLLFLVNTGESLKYTLVGELEVAASANDVWAFFASNDAPKLFVQRLPGVFERIETLEGDGGGSVSSRSVPLTNLEKFVTTDNQRRLKEILQTEGGYLDMGVTYFMESFQITRKGSNSCIIKSMINYEVPDDLAANVSHLISVECLINMAKVASKYIIDVGALNP*
Papaver_californicum|Pca_contig_28154.21		MRGHVTNEFDVVGASADEIWAVYGDKNLPNYVSSLQPGLFEVLEIVEGDGGVGTVLHIILSQGIPGPHEWKEKFTKIDDGKMVKQVTQVEGGFLGIGFKLHEITFEILPKDKDSCIIRSSVTVDIDSQFEANASAVTVDSMYGMARAITKYVLDNKAKA*
Papaver_californicum|Pca_contig_30099.2		MRYEFVNEFEAQASADDVWGMVYGSRDYPKVVVQLLPTVLEKKEILEGDGHNVGTVLLVVYLPGFVPRTYKEKIVTMDHEKRYKEVQMIEGGYLDMGFTYCMVIHEILAKECNSCIIRSSVKCEVKDEFAANVSHLRNTFDGYVALARAVPEYIAKQHATSAP*
Papaver_californicum|Pca_contig_31145.5		MRYEFINEIDVDASADEVWAIYSSPDFCKLVVQILSCILESKDVVEGDGRSVGTILRVVFLPGHVPRMYKEKFVTIDDDKRLKEIEMIEGGYLEMGFTFCMLSFEILAKESNQCIIKTVMKYEINDEVATGVTAHLNNSLDTWVTLARGVSGHIAQQKASSTIN*
Papaver_californicum|Pca_contig_31227.10		MEVATSADSVWAVYSSPGIPRLLRDVLLPGVFEKLDVIEGNGGVGTVLDIVFPPGAVPRRYKEKFVNINHEKRLKEVIMIEGGYLDMGCTFYLDRIHVVEKTPSSCVIESSIVYEVKEEYADAMSELITTEPLKSMAEVISNYVIQKESQRNILNKQSLVKKEIRYDLEVPTSADFIWSVYSSPDIPRLLRDVLLPGVFEKLDVIEGNGGVGTVLDIVFPPGAVPRRYKEKFVNINHEKRLKEVIMIEGGYLDMGCTFYLDRIHVIEKTSKSCVIKSSVVYEVKQECADAMSKLITTEPLKSMAEVISNYAIKQQSVSDRNIPKKQSLLRKEITYEMEVQTSADSIWDVYSSPDIPRLLRDVLLPGVFEKLDVIAGNGGVGTVLDIAFPLGAVPQRYKE…
Papaver_californicum|Pca_contig_31299.286		MKGQLSKEIELPVQASNLWDVYGTLELGKLVPKLLPEILHNVEIDNGDGGVGTVLKLTLPPGSPIAYYKEKFTKIDKEKRIKVTEVVEGGVLELGFSLYRITLEIIEKEGDPSSSIVISTIDYELDDASADSAALVSIKPLEVIAQTIGMYLKEQKNGANI*
Papaver_californicum|Pca_contig_32280.2		MRYEFTNEFEVNASADDVWEIYSSPNFHALTVQLLPNIIKRKDILEGDGCSVGTILRVVLHQGHSSLPMGKEKIVTVDHEKRLKEIQTIEGGYLEIGCKFSMLSFEILVKERNSCIIKTVTKYEINDNFATTVSGHLHTYLNGCVTIAQGVSKHITEQNARAAN*
Papaver_nudicaule|Pnu_contig_2396.1		MKYEFINEFQVDACADDVWAVYSSPNFPALTVQLLPGILKSKDILEGDGSGVGTVLRVVLLPAHGLPLPVCKEKIVTLDHKKRLKELQMIEGGYLELGCTSSMLSFEILDKERNSCVVKTVTKYQVPDDLADGISGHLHTFLDAGIAIARGVSKYIIHQKSGVAN*
Papaver_nudicaule|Pnu_contig_16756.1		MRGHVTNEMDVAGASANEIWAVYGSKDLPRLIITLQPGVFEKIDIVEGDGGAGTVLHIIMAEGISGPHEWKEKFVTLDNHTRVKQIEQIQGGYLDMGFSLHQVTYEIIEKDENSCIIRSTVKIELDDEFESNASSITVDSMWGMAKSIAKYVLDGKAEK*
Papaver_nudicaule|Pnu_contig_40652.1		MRFEFINEFEAHAPADDVWAFYSSPNYPKQVVELLPTILETKEILEGDGHSVGTVIRVVYLPGYVPHTYNEKIVTVDHGKRLKEVQQIEGGYLDMGFTYCMVSHEILAKECNSCIIKSAVHAEINDEAANGSIIHNTLDGYVALARAVSKHIGEQHAKSAN*
Papaver_nudicaule|Pnu_contig_45520.1		MMKPIVLVCFFVFFLMGKGGDSMRYELNNEIDVQLSAASIWKIDYIEGNGGVGTVIRVIFVPGSVPRMYREMFRKIDHVHRVKEIQQISGGYLAMGVTSYVDKFKIISTGPNSCTIRSTTEYEVPDHLADKVNSLISIEGLVPMAHAIIKYVKEFGDQVNVDESAHIALPSEN*
Papaver_nudicaule|Pnu_contig_47212.1		MRYELNNEIDVPLSARSIWNVYASKDLPKLIVKLLPEVFQQIDYISGDGGVGTVIRIIFPPGSVPRMYKEVFKTIDHVHRLKEVQQLSGGYLAMGVTYYMDKFKIISTGPNSCIIRSTTEYEVPDHLAEKFTSLISIEGLVPMAQAIVKYVQEFGDQVKNDDSANIALPISG*
Papaver_nudicaule|Pnu_contig_60672.2		MKYSFVFAALSFLFLIGKGNAMTYELTNEMAVNASANDIWAVYSSPDLPKLIVKLLPGVFERIDYVRGKGGLGTILRLVYPPGSVPLTYKEEFVTIDHRKRLKEVLQIEGGYLAMGATFYMDSFEIIKTGRDSCVIRSKTEFEVPDEKNVDLKVSKYVSVDGLVSMATAISKYVLDNKKRDGYIALVN*
Papaver_nudicaule|Pnu_contig_73179.1		MRYEFINEFEVSASADDVWAIYSSPNFHTLTVQLLPNTLKSKDILEGDGCSVGTILCVVLLPGHGLPASKEKIVTVDHEKRLKEIQTIEGGYLEMGCTFSILSFEILVKEINACVIKTVTKYEINDDLAASVSGRLHTYLDGCVAIAQGISNQLAEQIARAAI*
Papaver_nudicaule|Pnu_contig_91700.1		MTNKSVFLVLFLVFLMGKGDSMRYELNNEIDVPLSARSIWNVYASKDLPKLIVKLLPEVFQQIDYIEGNGGVGTVIRIIFPPGSVPRMYREVFKTIDHVHRLKEVQQISGGYLAMGVTYYMDKFKIISTGPNSCIIRSTTEYEVPDHLAEKFTSLISIEGLVPMAQAIVKYVQEFGDQVKIDDSAFTALPI*
Papaver_nudicaule|Pnu_contig_101995.1		MMKPILLVCFFVFFLMGKGDSMRYELNNEIDVQLSAASIWKVYASKDLPKLIVKLLPEVFQQIDYIEGNGGVGTVIRVIFVPGSVPRMYREMFRKIDHVHRVKEVQQISGGYLAMGVTSYVDKFKIISTGPNSCTIRSTTEYEVPDNLADKVNSLISIEGLVPMAHAIIKYVKEFGDQVNVDESAHIALPSEN*
Papaver_nudicaule|Pnu_contig_102431.1		MKYSLVFAALSFLFLMGKGNAMTYELTNEMAVNASANDIWAVYSSPDLPKLIVKLLPGVFERIDYVRGKGGLGTILRLVYPPGSVPLTYKEEFVTIDHRKRLKEVLQIEGGYLAMGATFYMDSFEIIKTGRGSCVIRSKTAFEVPDEKNVDLKVSKYVSVDGLVSMATAISKYVLDNKKRDGYIALVN*
Papaver_nudicaule|Pnu_contig_109611.1		MRFEFINDFEAHASADDVWAFYSSPNYPKQVVQLLPTILETKEILEGDGHSVGTVIRVVYLPGYVPHTYNEKIVTVDHEKRLKEVQQIEGGYLDMEFTYCMVSHEILAKECNSCIIKSAVHAEINDEAAANGSIIHNTLDGYVALARAVSKHIGEHHAKSAN*
Papaver_nudicaule|Pnu_contig_119882.1		MKYEFINEFQVDACADDVWAVYSSPNFPALTVQLLPGILKSKDILEGDGSGVGTVLRVVLLPAHGLPLPVCKEKIVTLDHKKRLKELQMIEGGYLELGCTSSMLSFEILDKERNSCVVKTVTKYQVPDDLADGISGHLHTFLDAGIAIARGVSKYIIHQKSGVAN*
Papaver_nudicaule|Pnu_contig_121170.1		MKYQIAFSIFLMFSSIYSADSLKYTLINELDVAAPADDVWALIASKDAPKTFEMLLPGMFEKLEIIEGDGGVGTVLLVVYPPGSVPLSNEEKFVTIDNHKRLKEILQTKGGYLDMGVTFYMESFQIFPKGRNSCVWKSVVKYEVPDELASNVSSLISVEGLLTMAKAAAKYVVDSKKQSTNY*
Papaver_nudicaule|Pnu_contig_131560.1		MRGHVTNEMDVVGASADEIWAVYGSKDLPKLIITLQPGVFEKIDYVEGDGGQGTILHIVMAQGIPGPREWREKFVTIDNCRRVKQLQQIQGGYLDLGFSLYKVTYEILPKDRNSCIIRSTVQIDLDDVNFEANARFITVDSMWGMAKSIVKYVLDNKAKK*
Papaver_nudicaule|Pnu_contig_150273.1		MKYQIAFSIFLMFSSIYSAESLKYTLINELDVAAPADDVWALIASKDAPKTFEMLLPGMFEKLEIIEGDGGVGTVLLVVYPPGSVPLSNEEKFVTIDNHKRLKEILQTKGGYLDMGVTFYMESFQIFPKGRNSCVWKSVVKYEVPDELASNVSSLISVEGLLTMAKAAAKYIVDSKKQSSNY*
Papaver_nudicaule|Pnu_contig_152845.1		MSAQSGIQKSSAGDNGFPGTSIIPDPKGDSVRYELVNEIEVQASASSIWDVYSSKDLPKLIVKLLPQVFDRIDYVSGDGSVGTVVHVVFAPGSVPQSYSEMFKTIDHVNRLKEVKQVSGGYLAMGVTSYMDKFKIISTGPNSCIIRSTTEYEVPDHLAAEMAKRISVQGLVTMANAIVKYVQAGTQ*
Papaver_nudicaule|Pnu_contig_157311.1		MKFEILLLVFSFLFVMGKGNSMRYELINEMEVAAPAEDIWAVYSSPNLPKLIVKLLPDVFERIDYVEGTGGVGTIIQVVYPAGSVPRTLKEKFVTIDDHRLLKEVQQIEGGHIAMGVKFHMISFKIIKKSPASCIIRSKIEYIVPDNLAAKISPLINVEGLVGMARAISKYVLDNKRN*
Papaver_nudicaule|Pnu_contig_158400.1		MRYEFTNEFEVEASADDVWAIYSSSNLRTSAVQLLPNFLKSKDILEGDGHTVGTIFRVVFLPGHNLPMYKEKIVTIDHKKRLKEIQTIEGGYLETGCTFNFEMNFCVIKTVTKYDINDDLATSVPGHLHILLDACVDLARGVSKHITEKNASAAK*
Papaver_nudicaule|Pnu_contig_166181.1		MISYKLVADLEVAASADDVWGIIGSKDAPKFFMDALPGVFEKIEVLEGDGGVGTVLLIVYPEGSVPLTNEEKFVTMDDHRLLKEILQTKGGYLDMGVTYYMETFKVIKCGNSCIIQSIVEYKAPEEVAAKVSSLISVEGLLNMAKIVARHVLEAKASSIAAV*
Papaver_nudicaule|Pnu_contig_183637.1		MKNQVVLFICLLFLVHTGESLKYTLIGELEVAASASEVWAFFASNDAPKMFVQLLPGLFERIEILEGDGGVGSVLRIVYPAGSVPLTNKEKFVTIDDRRRLKEILQTEGGYLDLGVTNLMESFQITRKGANSCIIKSMINYEVPDDLAANVAPLISIEGLINMAKVAANYIIDSKNKTSSIADM*
Papaver_nudicaule|Pnu_contig_184124.1		MRGHVTNEMDVAGASANEIWAVYGSKDLPRLIITLQPGVFEKIDIVEGDGGAGTVLHIIMAEGISGPHEWKEKFVTLDNHTRVKQIEQIQGGYLDMGFSLHQVTYEIIEKDENSCIIRSTVKIELDDEFESNASSITVDSMWGMAKSIAKYVLDGKAEK*
Papaver_nudicaule|Pnu_contig_201159.1		MISYKLIADLEVAASADDVWGIIGSKDAPKFFMDALPGVFEKIEVLEGDGGVGTVLLIVYPEGSVPLTNEEKFVTMDDHRFLKEILQTKGGYLDMGVTYYMETLKVIKCGNSCIIQSIVEYKAPEXXXXXXXXXXXXXXXXXXXXXXXXXXXXXXXXXFSWYMYSTSIRKVTDRLL*
Papaver_nudicaule|Pnu_contig_213210.1		MRYEFTNEFEVKASADDVWAIYSSSNLRTSAVQLLPSILKSKDILEGDGCSVGTIFRVVFLPARYNIPMYREKIVTVDHQKRLKEIQTIEGGYLEMGCTFCMLSFEILAKEANSCVIKTVTKYEVNDDLPTSVSNNLHIVLNACIDLARGVSKHITEKNASAAN*
Papaver_nudicaule|Pnu_contig_242618.1		MMKLTVLICFFVFFLMGKGDSMRYELNNEIDVQLSAASIWKVYSSKDLPKLIVKLLPEVFQQIDYIEGNGGVGTVIRVIFVPGSVPRMYREMFRKIDHVHRVKEVEQISGGYLAMGVTSYVDKFKIISTGPNSCTIRSTTEYEVPDHLADKVNSLISIEGLVPMAHAIMKYVKEFGDQVNIDESAHI
Papaver_nudicaule|Pnu_contig_268512.1		MKFEILILVFSFLFVMGKGNSMRYELINEMEVAAPAEDIWAVYSSPNLPKLIVKLLPDVFERIDYVEGTGGVGTIIQVVYPAGSVPRTLKEKFVTIDDHRLLKEVQQIEGGHIAMGVKFHMISFKIIKKSPASCIIRSKIEYIVPDNLAAKISPLINVEGLVGMARAISKYVLDNKKY*
Papaver_nudicaule|Pnu_contig_274461.1		MRYEFINEFEVSASADEVWAIYSSPNFHTLTVQLLPNTLKSKDILEGDGCSVGTILCVVLLPGHGLPASKEKIVTVDQERRLKEIQTIEGGYLEMGCTFSILSFEIVAKGINACVIKSVAKYEINDDLAASVSGRLHTYLDGCVAIAQGISKQLPEQNARAAINLQQPFII*
Papaver_nudicaule|Pnu_contig_283176.1		MTYKLINEMKVNASVNDIWAVYSSPDLPKLITKLLPGAVENIDFVKGNGGIGTILRVVFPPGSVPLSYKEKFITIDNRRRLKQVLQIEGGYLAMGVTFFMERFKIIKTSRNSCTIRSIVEYEVPDKLAAKISPLISVDGFVMMAKSISKYVLDNKKNG*
Papaver_nudicaule|Pnu_contig_301007.1		MKYQIVFSIFLLFSSIYSAESLKYTLINEMDVVGASADEIWSVFGSNDAPKIFLQLLPGVFEKIEILKGNGGVGSILRIVYPKGTVPLTNKEKFVTIDNRRRLKEVLQTEGGYLAMGATFYMETFQIFPKGHNSCTIKSMVRYEVPEKLASNVSPIISVEFLLTMAKVATKYVIENKKKISKYYVAVV*
Papaver_nudicaule|Pnu_contig_303974.1		MVSYKLIADLEVAASADDVWGIIGSKDAPKFFMDALPGVFEKIEVLEGDGGVGTVLLIVYPEGSEPLSNEEKFVTMDDHRLLKEILQTKGGYLDMGVTYYMETLKVIKCGNSCIIQSIVEYKAPEEVAAKVSSLISVEGLLNMAKIVARHVLEAKASSIAAV*
Papaver_nudicaule|Pnu_contig_306097.1		MMKPILLVCFFVFFLMGKGDSMRYELNNEIDVQLSAASIWKVYASKDLPKLIVKLLPEVFQQIDYIEGNGGVGTVIRVIFVPGSVPRMYREMFRKIDHVHRVKEIQQISGGYLAMGVTSYVDKFKIISTGPNSCTIRSTTEYEVPDHLADKVNSLISIEGLVPMAHAIIKYVKEFGDQVNVDESAHIALPSEN*
Papaver_nudicaule|Pnu_contig_311895.1		MRYEFINEFEVNASADDVWAIYSSSNLRTSAVQLLPNILKSKDILEGDGYSVGTVFRVVLLPGHVTPMFKEKIVTVDHQRRLKELEMIEGGYLEMGCTFCMLSFEILVKERNSCVIKTVTKHEINDDLATSVSGHFHTYFDGGVTIAQGVSKHIAKQKARADN*
Papaver_nudicaule|Pnu_contig_316227.1		MKYEFINEFQVDVCADDVWAVYSSPNFPALTVQLLPGILKSKDILEGDGSGVGTVLRVVLLPAHGLPLPVCKEKIVTLNHEKRLKELQMIEGGYLELGCTSSMLSFEILEKERNSCVVKTVTKYEVPDDLAAGISGHLHTFLDAGIAIARGVSKYIIQQKSGIAN*
Papaver_nudicaule|Pnu_contig_322057.1		MKSELVFVVFSFFVLVAKGNSMTYKLINEMKVNASANDIWAVYSSPDLPKLITKLLPGAVENIDFVKGNGGIGTILRVVFPPGSVPLSYTEKFITIDNRRRLKQVRQIEGGYLAMGVTFIMERFKIIETSRNSCTIRTIVEYEVPDKLAAKISPLISVDGFVMMAKSISKYVLDNKKNE*
Papaver_nudicaule|Pnu_contig_348223.1		MRYEFINEFEVKASSDDVWAIYSSSNLRTSAVQLLPSILKSKDILEGDGCSVGTIFRVVLLPGYNIPMYKEKIVNMDHQKRFKEIQTIEGGYLEMGCTFCMLSFEILAKETNSCVIKTVTKYEINDDLATSVPNNLHIVLNACVDLARGVSKHITEKNASADN*
Papaver_rhoeas|Prh01G32540.0		MTSSLTPYFILNMVSYKLIAELEVAVSADDVWGVIGAKDAPQFFMNALPGMFEKIEILEGDGGVGTVLLIVYPEGSVPLTNEEKFVTMDDCKRLKEILQTKGGYLDMECGNSCIIQSIVEYKAPEQVAAKVSSLISVEGLLVMAKIVAGAKGQNAPIWTPTKLKCPGR
Papaver_rhoeas|Prh01G37790.0		SLNYTLISEFEVAAPADDVWALISSKDAHKTFLMLLPGMFEKLEILEGDGGVGTVLLVVFPPGTVPLSNEGKYVTVDNRRRVRQILQVKGGYLDMGVTYFMETFEIRPKGCNCVFKSMIEYEVPDELAPDVSSIISVEGILIMAKAAAKYVVDNRKKTPNHSY
Papaver_rhoeas|Prh01G00360.0		MKYQIVFSIFLLFSSINMAESLKYTLISELDVAAPADDVWALIASKDAPKTFEMLLPGMFEKLEIIEGDGGVGTVLLVVYPPGSVPLSNEEKFVTIDNHRRLKEILQTKGGYLDMGVTFYMESFQIFPRGRNSCVFKSMVRYEVPDELAPNVSSLISVEGLLTMAKAAAKYVVDNNKIKSNY
Papaver_rhoeas|Prh01G00390.0		MKYQIVFSIVLLFSSIYSAESLKYTLISELDVVGASADEIWALFASNDAPQIFQQLLPGVFEKIEVLEGNGGVGSVLRITYPEGSVPLTNKEKFVTIDNGRRLKEVLQTEGGYLDMGVTFFMESFEIIPKNYKSCIIKSMVRYTVPDAAASNVSHLISIEGLLGMAKVAAKYVIDNKKKIAEY
Papaver_rhoeas|Prh01G00380.0		MKYQIVFSIFLLFSSIYSAESLKYTLISELDVVGASADEIWAVFASNDAPQIFQQLLPGVFEKIEVLEGNGGVGSVLRITYPKGSVPLTNKEKFVTIDNRRRLKEVLQTEGGYLDMGVTYFMESFQITPKSYNSCIIKSMVRYEVPDAAASNVSPLISVEGLLGMARAAAKYVIDNKKKIAEY
Papaver_rhoeas|Prh01G29930.0		MKSDLVFVVFSFLIMASKGNSMTYELINQMKVNASANDIWAVYSSPDLPKLINKFLPGAIERIDYVKGNGGVGTILHIVFPPGSVPLSYKEKFITIDSRRLLKEVLHIEGGYLAMGVTFYMERFKIIKKSCNSCIIRSMIEYEVPDKLAANISPLISVDGFVSMATAISKYVLENKKNGYKPCFAN
Papaver_rhoeas|Prh01G30130.0		MGSKGNSMTYELINQMKVNVSANDIWAVYSSPDLPKLINTFLPGAIERIDYVKGNGGVGTILRIVFPPGSVPQSYKEKFITIDSRRLLKEVLHIEGGYLTMGVTFYVERFKIIKKSCNSCIIRSMIEYDVPDKLAANISPLISVDGFVSMATAISKYVMDNKKNGYKPCLAN
Papaver_rhoeas|Prh02G51430.0		MKYQVGLSIFLLFLIGVGESSKYTLINDFNVAASADEVWEVYSSHNLPKLIVKLLPVMFSRIDVLKGDGGVGTILRLVYPPGSVPLTYKEKFVTIDNRRRLKEVLQIEGGYLEMGVTFYMDSFQVIKRGPNSCIIRSITKYEIRDDLAVKVSPLISVDSLVTMARAISKYVLENKKKANSTVVP
Papaver_rhoeas|Prh02G51440.0		MRYELINEFDVEASADDVWAVYSSPDLPKLIVELLPGVFEKIDVVEGNGGLGTVLHLVYPHGSVPLSYKEKFITMDNHKRLKEVRQIEGGYLEMGCTFYMDSFQILKKTHDSCTIRSITKYEVSAELAEKVSSHISVESLVDMARAISKYVIEKNEKKKAEDPSTCSGEGQEKRHGHLHRIWNSLFGK
Papaver_rhoeas|Prh02G12350.0		MKTNPTPSGLGVSALEEKNLGRVAQIIGTVLDVSFPPGKMPNIYNALVVKGRNTDGELINVTCEVHQLLGNNRVRVVAMSATYGLKRGMEVIDTGAALSVPVGGATLGRIFNVLGDPVDNLGPVDTRTTSPIHRFALAFIQLDTKLSIFETGIKEVDLLDPYRRGGGGGE
Papaver_rhoeas|Prh02G05640.0		MKKVIRYDLEVPTSADSIWAVYGSPDIPRLLRDVLLPDVFEKLDVIEGDGDVGTILEVVLHPGVVARCYKEKFETIDHEKRLMEVSVIEGGFLDMGCTFYLNKIHVIEKTSKSCVIKSSIIYEVKEECADKMSKLITTIQLESMADVISNYVLKKQSLIRKEVTYEMEVPSSADSIWDVYSSPDIPRLLRDVLLPGVFEKLHVIEGNGGVGTVLDIALPIGAVLRSYKEKYVCINQEKRLKQVVMIEGGYLDMGCTFYMDRIHVLEKTPNSCVIESSIVYEVKEEYADKMSKLITTEPLKCMAEVISSYVLKKKQFHVLGLEVASKSGLSVLLFLVVCFAIVGGTLIAAVPL
Papaver_rhoeas|Prh02G54210.0		HTGESLKYTLIGELEVAASANDVWAFFASNDAPRMFVQLLPGVFERIDILEGSVPLTNLEKFVTIDNRRRLKEILQTEGGYLDLGVTYFMESFQIIRRGANSCTIKSMINYEVPDDLAANVSSLISIEGLINMAKVAAKYIIDNKSKAASLADM
Papaver_rhoeas|Prh02G07620.0		MKKVIRYDLEVPTSADSIWAVYGSPDIPRLLRDVLLPDVFEKLDVIEGDGGVGTVLQVVLHPGVVARCYKEKFETIDHEKRLMEVSVIEGGFLDMGCTFYLNRVHVVERTSKSCVIKSSIIYEVKEECANEMSMLITTIQLESMADVISKYVLNKSVPKKQSLIRKEVTYEMEVPSSADSVWDVYSSPDIPRLLRDVLLPGVFEKLHVIEGNGGVGTVLDIALPLGAVLRSYKEKFVCINQEKRLKQVVMIEGGYLDMGCTFYMDRIHVLEKTPNSCVIESSIVYELKEEYADKMSKLITTEPLKCMAEVISSYVLKKKKFQVLLGLEVTPKLRVSLLLFLVVCFAIVGGMLIAAVPL
Papaver_rhoeas|Prh03G00430.0		MKSDLVFVVFSFLIIARKGNSMTYQLINQMKVNASANDIWAVYSSPDLPKLINKFLPGAIERIDYVKGNGGVGTILRIVFPPGSVPLSYKEKFITIDSRRLLKEVLHIEGGYLTMGATFYMERFKIIKKSCNSCIIRSMIEYEVPDKLAANISPLISVDGFVSMATAISKYVLENKKNGYKPCFAN
Papaver_rhoeas|Prh03G00520.0		MKSGLVFVVFSFLIIARKGNSMTYELINKMKVNASANDIWAVYSSPDLPKLINKFLPGAIERIDYVKGNGGVGTILRIVFPPGSVPLSYKEKFITIDSRRLLKEVLHIEGGYLAMGVTFYIERFKIIKKSCNSCIIRSMIEYEVPNKLAANISPLVSVDGFVSMATAISKYVLENKKNGYKPCLAN
Papaver_rhoeas|Prh03G00560.0		MTSKGNSMTYELINQMKVNASANDIWAVYSSPDLPKLINKFLPGAIERIDYVQGNGGVGTILHIVFPPGSVPLSYKEKFITIDSRRLLKEVLHIEGGYLAMGVTFYIERFKIIKKTCNSCIIRSTIEYEVPDKLAANISPLISIDGFVTMATAISKYVLDNKKNGYTPCLAT
Papaver_rhoeas|Prh03G30220.0		MKGQLSKEIEVPVQASDLWNVYGTLELGKLVPKLLPEVLHNVEIDEGDGGVGTVLKLILPPGSPIAYYKEKFTKIDKEKRIKVTEVVEGGYLELGFSLYRVTLQIIEKESDLSSSIIISTIDYELDDASADNAALVSIKPLEVIAETIGMYLKDKKYDAITVQN
Papaver_rhoeas|Prh03G13120.0		MRGHVTNEMDVVGASADEIWAVYGSKDLPRLIITLQPGVFEKIDIVEGDGGAGTVLHIVMAEGISGPHEWNEKFVTLDNHTRVKQIEQIKGGYLDMGFSLHQVTYEIIEKDENSCIIRSTVKIELDDEFESNASFITVDSMWGMAKSIVKYVLDSKAGK
Papaver_rhoeas|Prh04G40590.0		MRGHVTNEFDVVGASADEIWAVYGDKNLPNYVSSLQPGLFETLEIVEGDGGVGTVLHIILSQGIPGPREWKEKFTKIDDRKMVKQVTQIEGGFLGIGFKLHEITFEIVPKRKDSCIIKSTVTVDIDSQSEANASMITVDSMYGMATAITKYVLDKKAKA
Papaver_rhoeas|Prh04G46110.0		MRYEFISEIKVDACADDVWAIYSSPNFPTLALQFLQNILKSKDIIEGDGYTVGTIMRLELLPGYGLPPFKEKILTVDHEKRLKELQTIEGGYLEMGCTFSMTRFEILEKERSSCLIKVVTKYEINDDLATSVYGHLHTYFDGCVTLARGVSKHVTEKNA
Papaver_rhoeas|Prh04G46170.0		MRYEFINEFDAHASADDVWGRVYGSLDYPKVVVQLLPTVLKTKEILEGDGHDVGTVLRVVYFPGFVPRTYKEKIVTMDHKKRYKEVQMIEGGYLDMGFTFVMVIHEVLAKGCNSCIIRSIVKYEVKDEFAANVSNIRNTFDGYVALARAVPEYIAEQHA
Papaver_rhoeas|Prh04G28430.0		MKYEIVFMVFLLLIGKGSSMKYTLINEMEVSASAKDIWAAYGSRGFPKLVAKLVPSVKIDIIQGNGGVGSVLDVVFPPGSVPLTLKEKIVVIDHHKRLKQVLQIEGGYLAMGVTFYMSSFEILKRGSDSCIIRSTITYRVPDVLAAKISPLISVDSLVGLARVVSKYIIDHRK
Papaver_rhoeas|Prh04G27080.0		MKYYKVLLLFCSFLFVMGKGNSMRYELINEMEVPASAEDIWEVYSSPDLPKIIVELLPNVFERIDYVKGTGGVGTIIQVVYTPGIVPRMLKEKFVTIDDQRRLKEVQQIEGGHIAMGVNFHMITFKIIKKGSDSCIIRSKIEYIVPDDLAAKIAPLINVEGLIGMARAITKYVLDNKRN
Papaver_rhoeas|Prh04G50690.0		MRGHVTNEMDVVGASADEIWAVYGSKDLPKLILTLAPGVFEKIEYIEGDGGQGTILHIVMAQGIPEPREWREKFVTVDHCRRVKQLQQIQGGYLDMGFSLYKVTYEILPKDKKSCIIKSTVQIDLDDKNFEANARLITVDAMWGMAKSIVQYVLDNKAKNKIRKILTYLLNSHKFRTITITSEKMRGHVTNEMDVVGASADEIWAVYGSKDLPKLIITLQPGVFEKIDYVEGDGGQGTILHIVMAQGIPGPHEWREKFVTIDNRRRVKQLQQIQGGYLDMGFSLYKVTYEILPKDKNSCIIRSTVQIDLDDKNFEANARLITVDSMWGMAKSIVKYVLDNKAKQ
Papaver_rhoeas|Prh04G50680.0		MRGHVTNEMDVVGASADEIWAVYSSKDLPRLIVTLQPDVFEKIDYIEGDGGQGTVLHIVMAQGIPGPHEWREKFVKIDNHKRVKKLQQIQGGYLDIGFSLYKATYEILPKDKNSCIIRSTVQIDLDDKNFQANARIITVDSMWDMAKSIVKYVLDNKAKH
Papaver_rhoeas|Prh04G50790.0		MRKETVFVLFLVFLMGKESCGMRYKLINEIDVDLSARSIWNVYSSKDLPVLIVKLLPEVFERIDILEGNGGVGTICRIVFPPGSVPRTYKEMFTKIDHVHRSKVIQQVSGGYLAMGVTSYTDMFKIISTGPNSCIIRSTTEYEVPDHLADKVNSLISIEGLVPMAHAIIKYVKEFGDQVNIEDSANIALPVGNDA
Papaver_rhoeas|Prh04G51020.0		MMKPAIFVVFFVFFFVGGADSMRYELNNEIDVPLSASSIWQVYACKELPKLIVKLLPHVFDRIDYISGDGGVGTVIRIIFPPGEVPRAYKETFRKIDHAQRLKEVQQISGGYLAMGVTSYVDKFKIISTGPNSCTIRSTTEYEVPDHLADKVKSLISIEGLVPMAKAIVDYVKDFGDYGQCLGTSADADLAHIELPV
Papaver_rhoeas|Prh04G51060.0		MGKEADSMRYELNNEIDVPLSASSIWQVYACKELPKLIVKLLPQVFDRIDYIEGNGGVGTVIRIVFPPGEVPRSYKEMFKKIDHVRRVKEVQQMSEGYLALGVTSYVDKFKIIRKGPNSCTIRSTTVYEVPDHLAADIAKLNITIEGLVTIAKAIVEYVQEYGDYGQCLGQNGLAHIALPV
Papaver_rhoeas|Prh04G51080.0		MMKPAIFVVFLVFFLMGKGADAMRYELNNEIDVPLSASSIWQVYACKELPKLIVKLLPEVFDRIDYIEGNGGVGTVIRIVFPPGEVPRSYKEMFRKIDHVHRLKEVQQISGGYLAMGVTSYVDKFKIISKGPNSCTIRSTTEYEVPDHLADKVKNLISIEGLVPMAKAIIDYVKEFGDYGQCLGSGANADLAHIALPV
Papaver_rhoeas|Prh04G43180.0		MRGHVTNEFDVVGASADEIWAVYGDKNLPNYVSSLQPGLFETLEIVEGDGGVGTVLHIILSQGIPGPREWKEKFTKIDDRKMVKQVTQIEGGFLGIGFKLHEITFEIIPKKKDSCIIKSTVTVDIDSQSEANASMITVDSMYGMSRAITKYVLDKKAKA
Papaver_rhoeas|Prh04G43170.0		MRGHVTNEFDVVGASADEIWAVYGDKNLPNYVSSLQPGLFETLEIVEGDGGVGTVLHIILSQGIPGPREWKEKFTKIDDRKMVKQVTQIEGGFLGIGFKLHEITFEIIPKHKDSCIIKSTVTIDIDSQSEANASMITVDSMYGMARAITKYVLDKKAKA
Papaver_rhoeas|Prh05G34760.0		MRYELINEFDVNASADDVWEVYSSPNLPKLIVDLLPGVFERIDFVEGNGGLGTLLRLVYPPGTVPLTYKEKFVTIDKSKRLKEVRQVEGGYLDMGVSFYMDSFQIIEKAGSNSCTIKSTTKYEINDDELAKKVSPLISVDSLVNMARGISKYVLKKQKGRSSHKHQPKKKVHEHGHPSADEGKHVHGRNRSFQG
Papaver_rhoeas|Prh07G11710.0		MKSGLVFVVFSFLIIARKGNSMTYQLINQMKVNVSANDIWAVYSSPDLPKLISKFLPSAIERIDYVKGNGGVGTILRIVFPPGSVPLSYKEKFITIDSRRLLKEVLHIEGGYLTMGATFYMERFKIIKKSCNSCIIKSMIEYEVPDKLAANISPLISVDGFVSMATAISKYVLENKNNGYKPCLAN
Papaver_rhoeas|Prh07G11760.0		MKSDLVFVVFSFLIIARKGNSMTYQLINQMKVNASANDIWAVYSSPDLPKLINKFLPGAIERIDYVKGNGGVGTILRSVPLSYKEKFITIDSRRLLKEVLHIEGGYLAMGVTFYMERFKIIKKSCNSCIIRSMIEYEVPDKLAANISPLINVDGFVSMATSISKYVLENKKNGYKPCLAN
Papaver_rhoeas|Prh07G12400.0		MKSGLVFVVFSFLIIARKGNSMTYQLINQMKVNASANDIWAVYSSPDLPKLINKFLPGAIERIDYVKGNGGVGTILRIVFPPGSVPLSYKEKFITIDSRRLLKEVLHIEGGYLAMGVTFYMERFKIIKKSCNLCIIRSMIEYEVPDKLAANISPLISVDGFVTMATAISKYVMENKMNGYKPCLAN
Papaver_rhoeas|Prh07G28470.0		MRYEFMNEIEVDASADEVWAIYSDPNFCKLVVQILSGILESKDVVEGDGRSVGSILRVVFLPGHVPRMYKEKFVTIDNEKRLKEIEMVEGGYLEMGFTFCMLSFEILAKESNLCVIKTVTKYEISEEVATGVTAHLNNSLDTWVALARGVSGHIAQQKAGSMAN
Papaver_rhoeas|Prh07G30780.0		MVKYMLSSELEVAAPAEFVWAVFSSKEVPKLVPKLLPNAFEKVEILEGDGGLGTVIDIVFPQGHVPLSYKEKIVTVNNQERLKETQQIEGGYLDMGVTFFIESFQMIEKDADSCIIKSTVRYEVPDDLAPNVSHLISADHLLTMAKVGAKYALSLRK
Papaver_rhoeas|PrhUNG00110.0		MGNSMTYQLTNQLKVNASANDIWAVYSSPDLPKLINKFLPGAIERIDYVKGNGGVGTILRIVFPPGSVPLSYKEKFITIDSRRLLKEVLHIEGGYLTMGVTFYVERFKIIKKSCNSCIIRSMIEYEVPDKLAANISPLISVDGFVAMATAISKYVIDNKKNGYQPCLAN
Papaver_rhoeas|PrhUNG41340.0		MKSEHVFIVLGFLICIGRVNSMRYELINEMKVNASANDIWAVYSSPDLPKLIVKLLPSAFERIDYVEGTGGLGTILRIVYPPGSVPLTYKEKFITIDNRKLLKEVLQVEGGYLDMGVTFYMDSFKIIKTGRDSCIIRSITRYEVPDELAAKISPLVSVDSLVSMATAISKYVLDNNKNGYDSYKALAN
Papaver_rhoeas|PrhUNG25980.0		MRYEFINEIEVNHASADDVWAICTAPNFPSLAAQLLPSKLKSKDILEGDGCSVGTILSVVFLPGCVVPAYREKIVTVNQEKHLKEIQMIEGGYLEMGCTFCMLSFEILVKERNSCIIKTVTKYEINDDLATGVSCHFHTSFDTWVALAQQVSKHIAEQNARAAN
Papaver_rhoeas|PrhUNG52190.0		MKGQVSKEVEAPVPASDLWDVYGTLELVRLIKELLPEILHDVGVDVGDGGVGTVLKITLGPGSPVAYYKEKFIEIDQEKRIKVVDVVEGGYLEAGFSLYRTTFEIIEKGDHSSVISTIDYELDDSSADNAALVSIKPLEIVAETLGKYLKEKKIEHANV
Papaver_rhoeas|PrhUNG05390.0		MKSEHVFTVLGFLICIGRVNSMRYELINEMKVNASANDIWEVYSSPNLPKLIVRLLPSVFERIDYVEGKGGLGTILRIVYPPGSVPLTYKEKFITIDKRKLLKEVLQVEGGYLAMGVTFYMDSFKIIKTGRDSCIIRSTTQYEVPDELAAKISPLVSVDSLVSMARAISKYVLDNKKNGYDSYEALAN
Papaver_rhoeas|PrhUNG12800.0		MMRKVIKYDMEVATSADSVWAVYSSPDIPRLLRDVLLPGVFEKLDVIEGNGGVGTVLDIAFPPGAVPRSYKEKFVNIDRENRLKEVIMVEGGYLDMGCTFYLDRIHVVEKTPSSCVIESSIVYEVKEEYADAMSKLITTEPLKSMAEVISNYVIHEQSVSARNILIKQSVVKKEIRYDLEVPTSADSIWSVYSCPDIPRLLRDVLLPGVFEKLDVIEGNGGVGTVLDIVFPPGAVPRSYKEKFVNINREKRLKEVIMIEGGYLDMGCTFYLDRIHVVEKTPSSCVIESSIVYEVKEEYADAISKLITTEPLKSMAEVISNYVIKQQSFSARNILNKNSLVKKEIRYDLEVPTSADSIWSVYSCPDIPRLLRDVLLPGVFEKLDVIEGNGGVGTVLDIVF…
Papaver_rhoeas|PrhUNG12840.0		MMRKVVRYDMEVATSADSIWAVYGSPDVSRLLRDVLLPGVFVKMDIIEGDGGVGTVLDVVFQPGAVPQSYKERFDTVDHEKRILEVSIIEGGYLDMGCTSYLNRMHVIEITSKSCVIKSSVIYDVKEECADALSKLITTIQLESMAKVVADYVLKKQQPDSDRNIPMKQSLMRKEITYEMEVQTSADSIWDVYSSPDIPRLLRDVLLPGTFEKLYVIQGNGGVGTLLDVALPLGAVPRSYKEKFVKINHEKRLKEVVMIEGGYLDTGCTYYMQRIHILEKTPNSCVIESSIIYEVKEEYADKMSKLITTEPLESMAEAISSYVLKKKFQVFGLEVKPKLVLSLLLCLIIFLATVGDFFIGGV
Papaver_rhoeas|PrhUNG12820.0		MDIIEGDGGVGIVLDVVFQQALLASLNYLEDVLLPGDLEKLHVIQGNGSVGTVLDIALPLGAAPRRYKEKFVKINHEKRLKEVVMIEGGYLDMGCTFYMDRIHVLDKTPKSCVIESSIVYEVKEECADKMSKLITTESLQSIPEAICNYVLEKQFQVFGFEVKPKLGLSLLVCLIIFLAIVGVFLIGGLPLKD
Papaver_rhoeas|PrhUNG27220.0		MQVLPQKVSHISNSRIIFKKLATPMKFELNNEIDVPLPASSIWRVYSSKDLPKLVVKLLPDYFHRIDYISGDGGVDTMIRCVPPGENPQSYKEMCTTIDHDKLLKEVHQVEGPYLDMGMTYYMDKFEIIKAGPNSCVIRSTTEYEVPDDRVDKYLKEEEKISVDGLVPMALAIVKFVQKNGDQVNIADWLSQQP
Papaver_rhoeas|PrhUNG43160.0		MEVATSADSVWAVYSSPDIPRLLRDVLLPGVFEKLDVIEGNGGVGTVLDIAFPPGAVPRSYKEKFVNIDRDKRLKEVIMIEGGYLDMGCTFYLDRIHVVEKTPSSCVIESSIVYEVEEEYADAMSKLITTEPLKSMAEVISNYVIQKESVSARNILSKQSIVKKEIRYDLEVPTSADSIWSVYSCPDIPRLLRDVLLPGVFEKLDVIEGNGGVGTVLDIVFPPGAVPRSYKEKFVNINREKRLKEVIMIEGGYLDMGCTFYLDRIHVVEKTPSSCVIESSIVYEVKEEYADAISKLITTEPLKSMAEVISNYVIKQQSFSARNILNKYSLVKKEIRYDLEVPTSADSIWSVYSCPDIPRLLRDVLLPGVFEKLDVIEGNGGVGTVLDIVFPPGAVPRSY…
Papaver_rhoeas|PrhUNG43180.0		MGIVYGSPDVSRLLRDVLLPGVFVKMDIIEGDGGVGTVLDVVFQPGAVPQSYKERFDTVDHEKRILEVSIIEGGYLDMGCTSYLNRMHVVEITSKSCVIKSSVIYDVKEECADVMSKLITTIQLESMAKVVADYVLKKQQPDSDRNIPMKQSLMRKEITYEMEVQTSADSIWELYSSPDIPRLLRDVLLPGTFEKLHVIQGNGGVGTILDIALPLGAVPRSYKEKIVKINHEKRLKEVVMIEGGYLDTGCTSYMRRIHILEKTPKSCVIESSIIYEVKEEYADKMSKVITTEPLESMAEAISSYVLKKKFIRVFGLEVKPKLVLSLLLCLIIFFAIVGDFFIRGVPLKA
Papaver_rhoeas|PrhUNG53690.0		MKHQIVSSIFLLFSSIYMAESLKYTLINELDVAAPADDVWALIASKDAPKTFEMLLPGMFEKLEIIEGDGGVGTVLLVVYPPGSVPLSNEEKFVTIDNHRRLKEILQTKGGYLDMGVTFYMESFQIFPRGRNSCVFKSMVRYEVPDELAPNVSSLISVEGLLTMAKAAAKYVVDNNKIKSNY
Papaver_rhoeas|PrhUNG53710.0		MKYQIVFSIFLLFSSIYSAESLKYTLISDLDVVGASADEIWAVFASNDAPQIFQQLLPGVFEKIEVLEGNGGVGSVLRITYPKGSVPLTNKEKFVTIDNRRRLKEVLQTEGGYLDMGVTYFMESFQITPKSYNSCIIKSMVRYEVPDAAASNVSPLISVEGLLGMARAAAKYVIDNKNKIAEY
Papaver_rhoeas|PrhUNG31590.0		MVKYKLISEIDVATSADFLWPLLSSKEIPKLATKLLPNKYEKVQVLEGDGGLGTVVHVIHPPGSVPLSYVQKIVTVDNCQRFQEIQQIKGGYLDMGVTLFIESFQVIEKDGDSSVVKSMVRYEVPDELAPNVSHLITPEDLLTRMKAGIKYALSLKK
Papaver_rhoeas|PrhUNG31600.0		MVKYKLISEIDVEASADFLWPVLSSKEIPKLVKQKNIPSSYEKVEVLEGDGGLGTIVHIVHPPGSVPVSYTQKIVTVDNHKRFQEIKQIEGGYLDMGVTLYIESFQVIEKDGDSSVVKSMVRYEVPDDLAPKVSHLITPEDQLTRIKAGVKYALKHKK
Papaver_setigerum|Pse01G00460.0		MRKVIKYDMEVAVSADSVWAVYSSPDIPRLLRDVLLPGVFEKLDVIEGNGGVGTVLDIVFPPGAVPRSYKEKFVNIDREKRLKEVIMIEGGYLDMGCTFYLDRIHVVEKTKSSCVIESSIVYDVKEECADAMSKLITTEPLKSMAEVISNYVIQKESFSARNILSKQSVVKKEIRYDLEVPISADSIWSVYSCPDIPRLLRDVLLPGVFEKLDVIEGDGGVGTVLDIVFPPGAVPRSYKEKFVNIDREKRLKEVIMIEGGYLDMGCTFYLDRIHVVEKSLSSCVIESSIVYEVKEEYVDAMSKLITTEPLKSMAEVISNYVIQRESFSARNILNKNSLVKKEIRYDLEVPTSADSIWSVYSCPDIPRLLRDVLLPGVFQKLDVIEGNGGVGTVLDIVFP…
Papaver_setigerum|Pse01G53710.0		MMKKVIKYDMEVATSADSVWAVYSSPDIPRLLRDVLLPGVFEKLDVIEGNGGVGTVLDIVFPPGAVPRSYKEKFVNIDREKRLKEVIMIEGGYRDMGCTFYLDRIHVVEKTPSSCVIESSIVYEVKEEYADAVSKLITTEPLKSMAEVISNYVIQKESVSPRINILDKQSLVKKEIRYDLEVPTSADSIWSVYSCPDIPRLLRDVLLPGVFEKLDVIEGNGGVGTVLDIVFPPGAVPRSYKEKFVNINHEKRLKEVIMIEEGYLDMGCTSYLDRIHVVEKTSKSCIIKSSVVYEVKRECADAMSKLITTEPLKSMAEVISNYAIKQQSASERNIPKKQSALIRKEINYETEVQTSADSIWNVYSSPDIHRLLRDVLLPGVFEKLDVIAGNGGVGTVLDI…
Papaver_setigerum|Pse01G53950.0		MNYQIVFSIFLLFSSIYTSVESLKYKLENELDVTGASAEEVWAIFASNDAPQIFFKILPGVFEIIEVLKGNGGQGSLILIVYPKGSIPLTNKEIFVTIDNSRRLKEVLQTEGGYLAMGVTFYMESFQIFPKGRNSCTIRSMVRYTVPDQCAHNVTSLISVEGLLNMAKAAAKYAIDSKRKLAADY
Papaver_setigerum|Pse01G17960.0		MRYEFVNEIEVDASADEVWAIYSSPTFCKLVVQILSGILESKDVVEGDGRNVGSILRVVFLPGHVPRMYKEKFVTIDNKKRLKEIQMIEGGYLEMGFTSCMLSFEILVKESNLCVIKTVTKYEISDEVATGVTAHLNNSLVHGSVWLEGFADISHSRKQAV
Papaver_setigerum|Pse01G36540.0		MRYEFMNEIEVDASADEVWAIYSDPNFCKLVVQILSGILESKDVVEGDGRNVRSILRVVFLPGHVPGMYKEKFVTIDNEKRLKEIQMIEGGYLEMRFTFCMLSFEILAKESNLCVIKTVTKYEISDELATGVTAHLNNSLDTLVTLARGVSGHISQQKTGSIAN
Papaver_setigerum|Pse01G38450.0		MVKYMLSSELEVAAPAEFVWAVFSSKEVPKLVPKLLPSAFEKVKILEGDGGLGTVIDLVYPQGHVPLSYKEKIVTVNNQECLKETQQIEGGYLDMGVTFLIESFQMIEKDADSCIIKSTVRYEVPDDLAHNVSHLISADHLLTMAKVGAKYALSLRQ
Papaver_setigerum|Pse01G46930.0		MRYEFINEMKVNASANDIWAVYSSPDLPKLIVRILPGVFERIDYVEGKGGVGSVPLTYKEKFITINNRRRLKEVLQIEGGYLAMGVTFHMDSFKIIKTACNSCIIRSITQYEVPDKLAAKISPLVSIDSHVGMPTAISKYVLDGKKNGYIVLAN
Papaver_setigerum|Pse11G15720.0		MMRKVIKYDMEVAVSADSVWAVYSSPDIPRLLRDVLLPGVFEKLNVIEGNGGVGTVLDIVFPPGAVPRSYKEKFVNINREKRLKEVIMIEGGYLDMGCTFYLDRIHVVEKTPSSCVIESSIVYEVEEEYADEMSKLITTEPLKSMAKVISNYVIQKESVSARNILSKQSVVKKEIRYDLEVPISADSIWSVYSSPDIPRLLRDVLLPGVFEKLDVIEGNGGVGTVLDIVFPPGAVPRCYKEKFVNINHEKRLKEVIMIEGGYLDMGCTSYLDRIHVIEKTSKSCIIKSSVVYEVKQECADAMSKLITTEPLKSMAEVISNYAIKQQSVFERNIPKKQSILRKEITYETEVQTSADSIWNVYSSPDIPRLLRDVLLPGVFEKLDVIAGNGGVGTVLDIAF…
Papaver_setigerum|Pse11G15740.0		MMRKVVRYDMEVATSADSIWAVYGSPDVSRLLRDFLLPGVFVKMDIIEGDGGVGTVLDVVFQPGAVPQSYKERFDTVDHEKRILEVSIIEGGYLEMGCTSYLNRMHVIEITSKSCVIKSSVIYDVKEECADAMSKLITTIQLESMAKVVADYVLKKQSAFDTNIPKKQSLVRKEITYEMEVQTSADSIWDIYSSPDIPRLLRDVLLPGDFEKIHVIQGNGGVGTLLDVALPLGAVPRRYKEKFVKINHEKRLKEVVMIEGGYLNMGCTFYMHSIHVLEKTPKSCVIESSIVYEVKEEYGDKMSKLITTEPLQSMAEAISSYVLNKQFQVFGLEVTPKLGLKLLLCLIIFSALRVKTVH
Papaver_setigerum|Pse12G03560.0		MRYELINEFDVNASADDVWEVYSSPNLPKLIVDLLPGVFERIDFVEGNGGLGTVLRLVYPPGTVPRTYKEKFVTIDKSKRLKEVQQIEGGYLDMGVTFYMDSFHIIEKVGCDSCTIKSTTKYEINDDELAKKVSPLISVDSLVNMARGISKYVLKNQSHKHQPKKEVHEHGHPSADEGKHVHPGSE
Papaver_setigerum|Pse12G03520.0		MRYELINEFDVNASADDVWEVYSSPNLPKLIVDLLPGVFERIDFVEGNGGLGTVLRLVYPPGTVPRTYKEKFVTIDKSKRLKEVQQIEGGYLDMGVTFYMDSFHIIEKVGCDSCTIKSTTKYEINDDELAKKVSPLISVDSLVNMARGISKYVLKNQSHKHQPKKEVYEHGHPSAD
Papaver_setigerum|Pse12G03590.0		MRYELINEFEVSASVDDVWEVYRSPILPKLIVDLLPGMFERIDFVEENGGLGIFLRLVYPPGTVQRTYKEKFMTIDKNKRLKEVKQIERGYLDMGVSFYMDSFEIIKKVGCNSCTIKSTIKYEIHDDELAKKVSPLITVDSLVNMARGISKYVLKKQNSHSSHKHHPKKKVHEIKNSLLSCMK
Papaver_setigerum|Pse12G04240.0		MRYELINEFDVNASADDVWEVYSSPNLPKLIVDLLPGMFERIDYVEGNGGLGTVLRLVYPPGTVPRTYKEKFVTIDKSRRLKEVQQMEGGYLDMGVSFYMDSFEIIEQVGCNSCTIKSTTKYEINDDELAKKVSPLISVDSLVNMARGISKYVLKKQNSRSSHKHDPKKKVHEHGHPSADEDKHVHGRDRSFHR
Papaver_setigerum|Pse13G02260.0		HNSLLAQNIPIYQNIVQIQGKMRYELINEFDVNASADDVWEVYSSPNLPKLIVDLLPGMFERIDFVEGNGGLGTVLRLVYPPGTVPLTYKEKFVTINKSKRLKEVQQMEGGYLDMGVSFYMDSFEIIEQVGCNSCTIKSTTIYEINDDELAKKVSPLISVDSLVNMARGISKYVLKKQNSRSSHKHDPKKKVHEHGHPSADEDKHVHGRDRSFHR
Papaver_setigerum|Pse13G41300.0		MKYYKVLLLYCSFLFVMGKGNSMRYELINEMEVAASAEDIWAVYGSPNLPKLIVQLLPDVFERIDYIKGTGGVGTIIQVVYSPGIGPRMLKEKFVTIDDHRRLKEVQQIEGGHIAMGVKFHMISFKIIKKGHDSCIIRSKIEYIVPDDLAAKIAPLINVEGLVGMARAISKYVLDNKRN
Papaver_setigerum|Pse14G01420.0		MKYQAGLSIFLLFLIGTGESSKYTLVNDFNVAASADEVWAVYSSHNLPKLIVKLLPGMFKRIDVLKGDGGVGTILRLVYPPGSVPLTYKEKFVTIDNRRRLKEVLQIEGGYLKMGVTFYMDSFQVIKRGRDSCIIRSITKYEIRDDLAVKVSPLISVDSLVTMARAISKYVLENKKKANSTIVP
Papaver_setigerum|Pse14G01430.0		MRYELINEFDVGASADDVWAVYSSPDLPRLIVELLPGVFKKIDVVEGNGGLGTVLHLVYPHGSVPLSYKEKFVTMDNHKRLKEVRQIEGGYLEMGCTFYMDSFQILKKTHDSCTIRSITKYEVSAELAEKVSSHISVESLVDMARAISKYVIQNNEKNKAEDPSTCSEEGHDKKHGHLHRIWISLFGK
Papaver_setigerum|Pse14G03070.0		MKNQVVLFICLLFLVHTGESLKYTLIGELEVAASANDVWAFFASNDAPRMFVQLLPGVFDRIEILEGNGGVGSVLRVVYPAGSVPLTNLEKFVTIDNRRRLKEILQTEGGYLDLGVTYFMESFQIIRRGANSCTIKSMINYEVPDDLAANVSPLISIEGLINMAKVAAKYIIDNKNKASSVADM
Papaver_setigerum|Pse16G01090.0		MMKTAIFMVFLVFFLMGKEADSMRYELNNEIDVPLSASSIWQVYACKDLPKLIVKLLPEVFDRIDYIEGNGGVGTVIRIVFPPGEVPRSYKEMFRKIDHVHRLKEVQQISGGYLAMGVTSYVDKFKIISRGPNSCTIRSTTEYEVPDHLADKVNQLISIEGLVPMAKAIVEYVKEFGDYGQCLGNNLAHIALPVEGN
Papaver_setigerum|Pse16G01100.0		MMKPAIFMVFFALFLMGKGADSMRYELNNEIDVPLSASSIWGVYACKELPKLIVKLLPQVFDRIDYISGDGGVGTVIRIVFPPGEVPRSYKETFRKIDHAQRLKEVQQLSGGYLAMGVTSYVDKFKIISTGPNSCTIRSTTEYEVPDHLADKVKSLISIEGLVPMAKAIIEYVKEFGDYGQCLGTSANADLAHIELPV
Papaver_setigerum|Pse16G01250.0		MRGHVTNEMDVVGASADEIWAVYGSKDLPKLIMTLAPGVFEKIDYIEGDGGQGTILHIVMAQEMPEPREWREKFVTVDHCRRVKQLQQIQGGYLDMGFSLYKVTYEILPKDKNSCIIKSTVQIDLDDKNFEANARLITVDAMWGMAKSIVQYVLDDKAKSAPSKILFPLHKLRTIRITSEKMRGHVTNEMDVVGASADEIWAVYGSKDLPKLIITLQPGVFEKIDYVEGHGGQGTILHIVMGQGIPGPHEWREKFVTIDNRRRVKQLQQIQGGYLDMGFSLYKVTYEILPKDKNSCIIRSTAKTFTTKISKI
Papaver_setigerum|Pse16G03250.0		MRYEFISELEVDACAADVWAIYSSPNFPTLALQFLQNILKSKDIVEGDGYTVGTIMRLELLPGYGLPPFKEKILTVDHEKRLKELQTIEGGYLEMGCTFSMTRFEILEKERSSCVIKVVTKYEINDDLATSVYGHLHTYFDGCVTLARGVSKHVTEKNA
Papaver_setigerum|Pse16G03220.0		MRYEFMNEFEAHASADDVWGRVYGSLDYPKVVVQLLPTVLETKKILEGDGHDVGTVLRVVYLPGFVPRTYKEKIVTMDHKKRYKEVKMIEGGYLDMGFTFVMVIHEVLAKECNSCIIRSIVKCEVKDEFAANVSNIRNTFDGYVALARAVPEYIAKQHATLAAN
Papaver_setigerum|Pse16G05350.0		MRGHVTNEFDVVGASADEIWAVYGDKNLPNYVSSLQPGLFETLEIVEGDGGVGTVLHIILSQGIPGPREWKEKFTKINDRKMVKQVTQIEGGFLGIGFKLHEITFEILPKDKDSCIIKSTVTVDIDNQSESNASMITVDSMYGMARAITKYVLDKKAKA
Papaver_setigerum|Pse16G05370.0		MRGHVTNEFDVVGASADEIWAVYGDKNLPNYVSSLQPGLFETLEIVEGDGGVGTVLHIILSQGIPGPREWKEKFTKINDRKMVKQVTQIEGGFLGIGFKLHEITFEILPKDKDSCIIKSTVTVDIDNQSESNASMITVDSMYGMARAITKYVLDKKAKA
Papaver_setigerum|Pse16G27370.0		MKGQLSKEIEVPVQASDLWDVYGTLELGKLVPNLLPEILHNVEVDNGDGGVGTVLKLILPPGSPIAYYKEKFTRIDKEKRIKVTEVVEGGYLELGFSLYRITLEIIEKEGDSSSSIIISTIDYELDDASADNAALVSIKPLEVIAETIGMYLKDKQNDANI
Papaver_setigerum|Pse18G01470.0		MKYQAGLSIFLLFLIGTGESSKYTLVNDFNVAASADEVWAVYSSHDLPKLIVKLLPGMFKRIDVVKGDGGVGTILRLVYPPGSVPLTYKEKFVAIDNRRRLKEVLQIEGGYLKMGVTFYMDSFQVIKRGRDSCIIRSITKYEIRDDLAVKVSPLISVDSLVTMARAISKYVLENKKKANSTIVP
Papaver_setigerum|Pse18G01490.0		MRYELINEFDVGASADDVWAVYSSPDLPRLIVELLPGVFEKIDVVEGNGGLGTVLHLVYPHGSVPLSYKEKFITMDNHKRLKEVRQIEGGYLEMGCTFYMDSFQILKKTHDSCTIRSITKYEVSTELAEKVSSHISVESLVDMARAISKYVIENNEKKKAEDPSTCSEEGREKKHGHLHRIWISLFGK
Papaver_setigerum|Pse18G02750.0		MKNQVVLFICLLFLVHTGESLKYTLIGELEVAASANDVWAFFASNDAPRMFVQLLPGVFDRIEILEGNGGVGSVLRVVYPAGSVPLTNLEKFVTIDNRRRLKEILQTEGGYLDLGVTYFMESFQIIRRGANSCTIKSMINYEVPDDLAANVSPLISIEGLINMAKVAAKYIIDNKNKASSVADM
Papaver_setigerum|Pse19G00320.0		MEKVIRYDLEVPTSADSIWAVYGSPDIPRLLRDVLLPDVFEKLDVIEGDGGVGTVLQVVFHPGAVPRSYKERFETVDHEKRLMEVSIMEGGYLDMGCTSYLNRIHVLEKTSKSCVIKSSIVYRVEEGCADVMSKLITTIQLESMAEVISNYVLKKQSASHTNIPKKQSLVRKEITYEMEVPTSADSVWHVYSSPDIPRLLRDVLLPGVFEKLHVIEGNGGVGTVLDIAFPLGAVLRSYKEKFVNINQEKRLKEVVMIEGGYLDIGCTFYMYRIHVLEKTPSSCVIESSIVYEVKEEYADKMSKLITTIPLKSLAEAISSYVLKKKQFQVFGLEVTPKLRFCLLLFLVVCFAVVGGMLIGGVPL
Papaver_setigerum|Pse19G02420.0		MRYELTNEFDVNASADDVWEVYSSPNLPKLIVDLLPGMFERIDFVEGDGGLGTLLRLVYPPGTVPLTYKEKFVTIDKSKRLKEVQQIEGGYLDMGVSFYMDSFQIIEKVGCDSCTIKSTTKYEINDDELAKKVSPLISVDSLVNMARGISKYVLKKQNSRSSHKYQPKKKVHEHEGKHAHARNRPFQG
Papaver_setigerum|Pse19G02440.0		MRYELINEFDVNASADDVWKVYSSPNLSKLIVDLLPGMFERIDFVEGDGGLGTVPITYKEKFVTIDKSKRLKEVQQIEGGYLDMGVSFYMDSFQIIEKVGCDSCTIKSTTKYEINDDELAKKVSPLISVDSLVNMARGISKYVLKKQNSRSSHKYQPKKKVHEHEGKHAHARNRPFQG
Papaver_setigerum|Pse20G01100.0		MMKPAIFVVVFVFILMGKGADSMRYELNNEIDVPLSASSIWRVYACKELPKLIVKLLPEVFDRIDYIEGNGGVGTVVRIVFPPGEVPRSYKEMFRKIDHVHRVKEVEQISGGYLAMGVTSYVDKFKIIKTGPNSCTIRSTTEYEVPDHLADKVKNLISIEGLVPMAKAIVEYVKEFGDYGQCLGNNLAHIALPEGN
Papaver_setigerum|Pse20G01120.0		MGKEADSMRYELNNEIDVPLSASSIWQLIVKLLPDVFDRIDYIEGNGGVGTVVRIVFPPGSVPRSYKEMFRKIDHVHRVKEVEQISGGYLAMGVTSYVDKFKIIRRGPNSCTIRSTTEYEVPDHLADEITKLNITIEGLVPMAKAIVDYVNEYGDYGQCLGENDLAHMALPV
Papaver_setigerum|Pse20G01130.0		MMMKPTVLMVFFAFFLIGKGDAGRYELINQIDVPLSDSSIWNVYSSIDLPKLIVKLLPQVFDRIDYISGNGSVGTIVRVVLTPGSTPQMYKEIFRTIDHAHYVKEVQQISGGYLAMGVTYYIDKVEVIRRGPNSCTIISTTEYEVPYHLADKVNSLIIKGLVPVAKAIAKYVLEFGDIHRGVQSEYGVVAADDGRCSDIGRDMLMKGGHAVDAAVATCLCLGVVYPMSSGIGGGAFMVVLNSSNSKAQAFNSRETAPNLASKDMYKNNITWKSKGAISMGVPGEIAGLHEAWSIYGKLNWSDLFQPAIKLARDGFVVSHFLGLGINKSREMFESDPAGLGKMFMPDGRLLQAGDTSYNRKLAETLETLAKEGPSAFYNGDLGKNFVKDVQAAEGIVTEE…
Papaver_setigerum|Pse20G01140.0		MMKPAIFMVFFALFLMGKGAESMRYELNNEIDVPLSASSIWGVYACKELPKLIVKLLPHVFDRIDYISGDGGVGTVIRIIFPPGEVPRSYKETFRKIDHAQRLKEVQQISGGYLAMGVTSYVDKFKIISTGPNSCTIRSTTEYEVPDHLADKVKSLISIEGLVPMAKAIIDYVKEFGDYGQCLGTSANADLAHIALPV
Papaver_setigerum|Pse20G01240.0		MRKEIVFVLFLLFLMGKESCAMRYKLINEIDVDLSARSIWNVYSSKDLPSLIVKLLPEVFERIDILEGNGGVGTVCRIVFPPGSVPRTYKEMFTKIDHVHRLKVIQQISGGYLAMGVTSYTDMFKIISTGPNSCIIRSTTEYEVPDHLADKVNTLISIEGLVPMAHAIIKYVKEFGDQVNIDDSANIALPVGNDA
Papaver_setigerum|Pse20G01360.0		MRGHVTNEMDVVGASADEIWAVYGSKDLPKLILTLAPGVFEKIDYIEGDGGQGTILHIVMAQGIPEPREWREKFVTVDHCRRVKQLQQIQGGYLDMGFSLYKVTYEILPKDKNSCIIKSTVQIDLDDKNFEANARLITVDAMWGMAKSIVQYVLDNKAKNIKLRTITITSEKMRGHVTNEMDVVGASADEIWAVYGSKDLPKLIITLQPGVFEKIDYVEGDGGQGTILHIVMAQGIPGPHEWREKFVTIDNRRRVKQLQQIQGGYLDMGFSLYKVTYEILPKDKNSCIIRSDNMRGHVTNEMDVVGASADEIWAVYGSKDLPKLIVTLQPDVFEKIDYVEGDGGQGTILHIVMAQGIPGPHEWREKFVTIDNCRRVKQLQQIQGGYLDMGFSLYKVTYE…
Papaver_setigerum|Pse20G03220.0		MHASADDVWGEVYGSIDYPKLVVQLLPTVLEKREILEGDGHNVGTVLRVVYLLGIVPRTYKEKIVTMDHKKRYKEVQMIEGGYLDMGFTFFMVIHEVLAKECNSCIIRLIVKCEVKDEFAANVSNIRNTFDGYVALARAVPEYIAKQHAASAAN
Papaver_setigerum|Pse20G35590.0		MKGQLSKEVEAPVPASDLWDVYGTLELVRLIKELLPEILHDVRVEVGDGGAGTVLKITLASGSPVAYYKEKFIEVDQEKRIKVVDVVEGGYLEAGFSLYRTTFEIIEKGDHSSVISTIDFELDDASADNAALVSIKPLEIVAETLGKYLKEKKIDHANV
Papaver_setigerum|Pse20G36280.0		MKKVVRYEVEVPTSADSIWKVYSSPDAPRLLRDVLLPGVFERLDILEGDGGVGTVVECVFTPGIVPHRYKEIFSVIDHEKRMKEVVMIEGGFLDMGCTSYLDRIQILDITSNSCLIKSCIVYEVKEEFADAMSKLITTVELESMAKVFSDYVLKKRISIFGFEIKPKLWLTMLLCLVICFAAVVGMLLIGGVPF
Papaver_setigerum|Pse20G36560.0		MRKVVRYELEVPTSADSIWNVYSSPDAPRLLRDVLLPGVFERLDILEGDGGVGTVVECVFTHGIVPHSYKEIFSVIDHEKRMKEVVMIEGGFLDMGCTSYLDRIQILEITSNSCLIKSCIVYEVKEEFADAMSKLITTVELESMAKVFSDYVLKKRFSLFGFEINPKLWLTMLLCLVISFAAVVGMLLIGGVPF
Papaver_setigerum|Pse02G01930.0		MKGQLSKKVEAPVPASDLWDVYGTLELVRLIKELLPEILHDVGVDVGDGGVGTVLKITLAPGSPVAYYKEKFIEVDQEKRIKVVDVVEGGYLEAGFSLYRTTFEIIEKGDHSSVISTIDYELDDASADNAALVSIKPLEIVAETLGKYLKEKKIDHANV
Papaver_setigerum|Pse02G01940.0		MKGKISKEVQVPVPASDLWAVYGTLELIRLIKKLLPEILRDFEVVIGDGGVGTVLKLTFPPESPVTNYSEKFTKVDNEKRIKVTEVVEGGYLEVGFSLYRVTYEITEKGEHSSVIITIEYELDDAFADNASLVSIKPLEVIAKTIGKYLKEKKG
Papaver_setigerum|Pse02G01950.0		MKGKISKEVQVPVPASDLWAVYGTLELIRLIKKLLPEILRDFEVVIGDGGVGTVLKLTFPPESPVTNYSEKFTKVDNEKRIKVTEVVEGGYLEVGFSLYRVTYEITEKGEHSSVIITIEYELDDAFADNASLVSIKPLEVIAKTIGKYLKEKKG
Papaver_setigerum|Pse02G01960.0		MKGKISKEVQVPVPASDLWAVYGTLELIRLIKKLLPEILRDFEVVIGDGGVGTVLKLTFPPESPVTNYSEKFTKVDNEKRIKVTEVVEGGYLEVGFSLYRVTYEITEKGEHSSVIITIEYELDDAFADNASLVSIKPLEVIAKTIGKYLKEKKG
Papaver_setigerum|Pse02G55730.0		MRGHVTNEMDVVGASADEIWAVYGSKDLPKLIITLQPGVFERIDIIEGDGGAGTVLHIVMAEGISGPHEWNEKFITLDNHTRVKQIQQIKGGYLDMGFSLHQVTYEIIEKDENSCIIRSTVKIELDDEFESNASSITVDSMWGMAKSIVKYVLDSKAEK
Papaver_setigerum|Pse21G05450.0		MKKNPTPSGLGVSALEEKNLGRVSQIIGTVLDVSFPPGKMPNIYKALVVKGRNTDGELINVTCEVQQLLGNNRVRAVAMSATDGLKREIEVTDTGAALSVPVGGATLGRIFNVLGEPVDNLGPVDTRTTSHIHRSAPAFIQLDTKLSIFETGIKVVDLLAPYRRGGK
Papaver_setigerum|Pse21G37080.0		MRYELINEFDVGASADDIWAVYSSPDLPRLIVELLPGVFEKIDVVEGNGGLGTVLHLVYPHGSVPLSYKEKFITMDNHKRLKEVRQIEGGYLEMGCTFYMDSFQILKKTHDSCTIRSITKYEVSAELAEKVSSHISVESLVDMARAISKYVIENNEKKKAEDPSTCSEEGHDKKHGHLHRIWISLFGK
Papaver_setigerum|Pse21G37100.0		MKYQVGLSIFLLFLIGTGKSSKYTLVNDFNVAASADEVWAVYSSHNLPKLIVKLLPGMFKRIDVLKGDGGVGTILRLVYPPGSVPLTYKEKFVTIDNRRRLKEVLQIEGGYLEMGVTFYMDSFQVIKRGRNSCIVRSITKYEIRDNLAVKVSPLISVDSLVTMARAISKYVLENKKKANSTIFP
Papaver_setigerum|Pse22G20710.0		MKYQIVFSIFLLFSSIYMAESLTYTLISELDVAAPADDVWALIASKDAPKTFEMLLPGMFEKLEIIEGDGGVGTILLVVYPPGSVPLSNEEKFVTIDNHRRLKEILQTKGGYLDMGVTFYMESFQIFPRGHNSCVFKSIVRYEVPDELAPNVSSLISVEGLLTMAKAAAKYVVDNNKIKSHY
Papaver_setigerum|Pse03G15530.0		MRGHVTNEMDVVGASADEIWAVYGSKDLPRLIITLQPGVFEKIDIVEGGGGAGTVLHIVMAEVGISGPHEWNEKFITLDNHTRVKQIEQIKGGYLDMGFSLHQVTYEIIEKDENSCIIRSTVKIELDDEFDSNASSITVDSMWGMAISIVKYVLDSKAEK
Papaver_setigerum|Pse03G45000.0		MRYELINEMEVHGAAEDIWAVYSSPNFPKLIVELLPDVFERIDYVKGTGGVGTIIQVVYSPGIVPRMLKEQFATIEDHRRLKEVQQNEGGHIAMGVKFHMISFKIIKKGSDSCIIRSKIEYIVPDDLVAKISPLINVESLVGMARAITKYVLDNKRS
Papaver_setigerum|Pse03G47570.0		MPRRVESGAGIFGRVRVGSAGWVGYVQPYVWGVIGAKDAAQFFMNALPGMFEKIEILEGDGGVGTVLRIVYPKGSVPLTNEEKFVTMDDCKRLKEILQTKEGYLDMGVTYYMETFKIIECGNSSIIQSIVEYKAPEEVAAKVSSLISVEGLFIKAKIVAKHVLMPKASPIAA
Papaver_setigerum|Pse04G01220.0		MMKPAIFVVVFVFIFMGKGADSMRYELNNEIDVPLSASSIWGVYACKELPKLIVKLLPEVFDRIDYIEGNGGVGTVIRIVFPPGEVPRSYKEMFRKIDHVHRVKEVEQISGGYLAMGVTSYVDKFKIIRTGPNSCTIRSTTEYEVPDHLADKVKNLISIEGLVPMAKAIVEYVKEFGDYGQCLGNNLAHIALPEGN
Papaver_setigerum|Pse04G01240.0		MMKPAIFVVFLVFLLMGKEADSMRYELNNEIDVPLSASSIWQVYACKDLPKLIVKLLPDVFDRIDYIKGDGGQGTIVRIVFPPGSVPRSYKEEFITIDHVHRLKEVKQYSGGYLAMGVISYIDKFKIISRGPNSCTIRSTTEYEVPDHLADKVKDLISIEGLVPMAKAIVEYVKEFGDYGQCLGENDLAHIDLPV
Papaver_setigerum|Pse04G01250.0		MGIGDAGRYELINQIDVPLSASYIWDVYSSSDLPKLIVKLLPKVFDRIDYISGNGSVGTIVSVVLTPGSTPQMYKEIYRTIDHVRLVKEVQQISGGYLAMGVTYYMDKVEVIPTDPYSCIIRSTTEYEVPYHLAYKVNSLIIKGLVPVAKAIAKYVLEFGDIHRGVQSEDGVVAADDGRCSDIGRNMLIRGGHAVDAAVATCLCLGVVYPMSSGIGGGAFMVVLNSSNSKAQAFNSRETAPKLASKDMYEKNITWKSKGASSMGVPGEIAGLHVAWSIYGKLNWSDLFQPAIKLARDGFVVSHFLGLGINKSREMIESDSNGLRRVFMPNGRLLQAGDTSYNRKLAETLETLAKEGPSAFYNGDLGKNFVKDVQAAQGIVTEEDLRNYEVNITDVVTTN…
Papaver_setigerum|Pse04G01270.0		MMKPAIFMVIFALFLMGKGADSMRYELNNEIDVPLSASSIWGVYACKELPKLIVKLLPHVFDRIDYISGDGGVGTVIRIIFPPGEVPRSYKETFRKIDHAQRLKEVQQLSGGYLAMGVTSYVDKFKIISTGPNSCTIRSTTEYEVPDHLADKVKSLISIEGLVPMAKAIVEYVKEFGDYGQCLGTSANADLAHIALPV
Papaver_setigerum|Pse04G01430.0		MRKEIVFVLFLVFLMGKESSAMRYKLINEIDVDLSARSIWNVYSSKDLPSLIVKLLPEVFERIDILEGNGGVGTVCRIVFPPGSVPRTYKEMFTKIDHVHRLKVIQQVSGGYLAMGVTSYTDMFKIISTGPNSCIIRSTTEYEVPDHLADKVNTLISIEGLVPMAHAIIKYVKEFGDQVNIDDSANIALPVGNDA
Papaver_setigerum|Pse04G01470.0		MRGHVTNEMDVVGASADEIWAVYGSKDLPKLIITLAPGVFEKIDYIEGDGGQGTILHIVMAQGIPEPREWREKFVTVDHCRRVKQLQQIQGGYLDMGFSLYKVTYEILPKDKNSCIIKSTVQIDLDDNNFEANARLITVDAMWGMAKSIVQYVLDNKAKQQNTRAT
Papaver_setigerum|Pse04G01490.0		MHGHVTKEMDVVGASADEILAVYGSKDLPKLIVTLQPDVFEKIDYVKGDGGQGTILHIVMAQGIPGPHEWREKFVTIENCRRVKQLQQIQGGYLDMGFSLYKVTYEILPKHHNSCIIRSTVQIDLDDKNFETNASLITVDSMWDMSKSIAKYVLDNKAKQ
Papaver_setigerum|Pse04G13530.0		MKYSLVFIILSFFLINQFSSANKGLVLASSVVHANKLAPALYVFGDSVVDSGNNNYLNTLAKGNYKPYGIGFPNGASGRFTNGYTIVDYLAAWLGLPFVPPYLGLSKVQKSKITTGINYASGAAGILPESGTATGDNLSLEKQVNYFKDTVQFDLPKSLKTRKNISTYLAKSIVVVVIGSNDYLNNYLQPTRYNSSKIYTPQQYGALLVSTLKQHLKNMYHIGARKFLVFEMGPIGCLPSVVNSVNPRPTTACVEGINGLVKIFNFGVTNMIQELRSTLKGSTFVYGDVFENTYHQAITPLKYEVLEGDGGLGTVVHIVHHPGSVPLSYTQKIVTVDNHKRFQEIQQIEGGYLEMGVTFYMESFQVIEKGCDSSVVKSMVRYEVPDDSAPKVSHLITPE…
Papaver_setigerum|Pse04G59410.0		MEKVIRYDLEVPTSADSIWAVYGSPDISRLLRDVLLPDVFEKLDVIEGDGGVGTVLQVVFHPGAVPRSYKERFETVDHEKRLMEVSIIEGGYLDMGCTFYLNRIDVLEKTSKSCVIKSSIVYRVEEECADVMSKLITTIQLESMAEVISNYVLKKQSASHTNIPKKQSLVRKEITYEMEVPTSADSVWHVYSSPDIPRLLRDVLLPGVFEKLHVIEGNGGVGTVLDIAFPLGAVLRSYKEKFVNINQEKRLKEVVMIEGGYLDIGCTFYMYRIHVLEKTPSSCVIESSIVYEVKEEYADKMSKLITTIPLKSLSEAISSYVLKKKQFQVFGLEVTPKLRFCLLLFLVVCFAVVGGMLIGGVPL
Papaver_setigerum|Pse05G04390.0		MKSELVLVVFSFLFLIGNGNSMTYELINKMKVNASANDIWAVYSSPDLPKIIVKLLPDVFERIDYVKGNGGVGTIIRLVYPPGSVPLTYKEKFITIDNRVHKEVPEIEGGYLYMGVTFYMDTYKIIKTGSDSCVIRSMVQYEVPDNLAAKISPLISVDGLVTMARATSKYVLDNKKKGFLAICPSL
Papaver_setigerum|Pse05G05900.0		MRGHVTNEMDVVGASADEIWAVYGSNDLPKLIITLQPGVFEKIDIVEGDGGAGTVLHIVMAEGISGPHEWNEKFITLDNHTRVKQIEQIKGGYLDMGFSLHQVTYEIIQKDENSCIIRSTVKIELDDEFDSNASSITVDSMWGMAKSIVKYVLDSKAEK
Papaver_setigerum|Pse05G46340.0		MKYCKVLLMFCSFLFVMGKGNSMRYELTNEMEVAASAEDIWAVYSSPNLPKLIVELLPDVFERIDYVKGTGGVGTIIQVIYSPGIVPRMLKEKFVTIDDHRRLKEVHQIEGGHIAMGVKFHMISFKIIKKGSDSCIIRSKIEYIVPDDFAAKIAPLINVEGLVGMARAITKYVLDNKRN
Papaver_setigerum|Pse05G52720.0		MRYEFINEFVVDASADDVWAIYSSPNFPDLSVQLLPNILKSKFILEGDGCSVGTILCVVPEHASLPMCKEKIVTVDHEKRLKEIHTIEGGYLARGCTFSMLSFEILVKEKSSCVIKTVTKYEINDDLATSASSHLHTYLDGCVTLARGVSKHIAEQNAGAAN
Papaver_setigerum|Pse05G54890.0		MRYEFINEFVVDASADDVWAIYSSPNFPALSVQLLPNILKSKFILEGDGCSVGTILCVVPEHASLPMCKEKIVTVDHEKRLKEIHTIEGGYLARGCTFSMLSFEILVKEKSSCVIKTVTKYEINDDLATSASGHLHTYLDGCVTLARGVSKHIAEQNAGAAN
Papaver_setigerum|Pse05G54930.0		MRYEFINEFDAHASADDVWGGIYGSIDYPKLVVQLLPTVLEKKEILEGDGHNVGTVLHVVYLPGFVPRTYNEKIVTMDHKKRYKEVQMVEGGYLDMGFTYVMVIHEVLAKECNSCIIRSIVKCEVKDEFAANVPNIRNTFDGYVALARAVPKYIAKQHATSAAN
Papaver_setigerum|Pse05G57600.0		MRGHVTNEMDVVGASADEIWAVYGSKDLPKLIVTLQPDVFEKIDYIKSDGGQGTILHIVMAQGIPGPREWKEKFVTIDNCRRVKQLQQIQGGYLDMGFCLYKVTYEILPKHHNSCIIRSTVQIDLDDKHFETNARLITVDSMWDMAESIVQYVLDNKAKQ
Papaver_setigerum|Pse05G57610.0		MRGHVTNEMDVVGASADEIWAVYGSKDLPKLIITLSPGVFEKIDYIEGDGGQGTILHIVMAQGIPEPREWREKFVTIDNCRRVKQLQQIQGGYLDMGFSLYKVTYEILPKDKNSCIIRSTVQIDLDDKNFEANARLITVDAMWGMAKAIVKYVLDNKAKQHEKCNFYAVVVNANRIQPKTFALKISKIGKILNIFAKQS
Papaver_setigerum|Pse05G57840.0		MMKPAIFMVFFALFLMGKGADSMRYELNNEIDVPLSASSIWGVYACKELPKLIVKLLPHVFDRIDYISGDGGVGTVIRIIFPPGEVPRSYKETFRKIDHAQRLKEVQQISGGYLAMGVTSYVDKFKIISTGPNSCTIRSTTEYEVPDHLADKVKSLISIEGLVPMAKAIVEYVKEFGDYGQCLGTSANADLAHIALPV
Papaver_setigerum|Pse07G34640.0		MMRKVIKYDMEVAISADSVWEVYSSPDIPRLLRDVLLPGVFEKLDVIEGNGGVGTVLDIVFPPGAVPRGYKEKFVNIDREKRLKEVIMIEGGYLDMGCTFYLDRIHVVEKTPISCVIESSIVYEVNEEYADAMSKLITTEPLKSMAEVISNYVIQKESVSVGNIFNKQSLVKKEIRYDLEVPTSADSIWSVYSCPDIPRLLRDVLLPGVFEKLDVIEGNGGVGTVLDIVFPPGAVPRRYKEKFVNINHDKRLKEVIMIEGGYLDMGCTSYLDRIHVIEKTSKACIIKSSVVYEVKEECADAMSKLITTEPLKSMAEVISNYAIKQQSVSGRNIPKEKQSLIRKEITYETEVQTSADSIWDVYSSPDIPRLLRDVLLPSVFEKLDVIAGNGGVGTVLDIA…
Papaver_setigerum|Pse08G01580.0		MAFQIFYKCNYEATRQPIQNTQHTFENLFQVHSFYRISCYQRKTMKYQIVFSIFLLSSSIYMAESLKYILISELDVAAPADDVWALIASKDAPKTFEMLLPGMFEKLEIIEGDGGVGTVLLVVYPPGSVPLSNEEKFVTIDNHRRLKEILQTKGGYLDMGVTFYMESFQIFPRGHNSCVFKSMVRYEVPDELAPNVSSLISVEGLLTMAKAAAKYVVDNNKIKSNY
Papaver_setigerum|Pse08G01600.0		MKYQIVFSVFLLFSSIYSAESLKYTLISDLDVVGASADEIWALFASNDAPQIFQQLLPGVFEKIEVLEGNGGVGSVLGITYPKGSVPLTNKEKFVTIDNRRRLKEVLQTEGGYLDMGVTFFMESFEIIPKNYKSCIIKSMVRYTVPDAVASNVSHLISIEGLLGMAKVAAKYVIDNKKKIAEY
Papaver_setigerum|Pse09G02580.0		MKYQVGLSIFLLFLIRTGKSSKYTLVNDFNVAASADEVWAVYSSHNLPKLIVKLLPGMFKRIDVLKGDGGVGTILRLVYPPGSVPLTYKEKFVTIDNRRRLKEVLQIEGGYLEMGVTFYMDSFQVIKRGRDSCIVRSITKYEIRDNLAVKVSPLISVDSLVTMARAISKYVLENKKKANSTIFP
Papaver_setigerum|Pse09G02590.0		MRYELINEFDVGASADDIWAVYSSPDLPRLIVELLPGVFEKIDVVEGNGGLGTVLHLVYPHGSVPLSYKEKFITMDNHKRLKEVRQIEGGYLEMGCTFYMDSFQILKKTHDSCTIRSITKYEVSAELAEKVSSHISVESLVDMARAISKYVIENNEKKKAEDPSTCSGEGHEKKHGHLHRIWISLFGK
Papaver_setigerum|Pse09G04220.0		MKNQVVLFICLLFLVHTGESLKYTLIGELEVAASANDVWAFFASNDAPRMFVQLLPGVFDRIEILEGDGGVGSVLRVVYPAGSVPLTNLEKFVTIDNRRRLKEILQTEGGYLDLGVTYFMESFQIIRRGANSCTIKSMINYEVPDDLAANVAPLISIEGLVNMAKVAAKYVIDNKNKAASLADM
Papaver_setigerum|Pse09G41870.0		MVNYKLIAELEVAASADDVWEVIGAKNAPEFFKNSLPGVFEKLEVLEGDGGVGTVLLIEYPDGLSNKERFVTVDHHRRLKEILQTEGGYLGMGVTYYMETFKVIECANSCIIQSIVEYKASEEVAAEVSNLISVEGLLNMAKIVAKHVLNKEKAPSTDAA
Papaver_setigerum|Pse09G42370.0		MVSYKLIAELEVAASADDVWGVIGAKDAPQFFMNALPGMFEKIEILEGDGGVGTVLLIVYPEGSVPLTNEEKFVTMDDCERLKEILQTKGGYLDMGVTFYMETFKILECGNSCIIRSIVEYKAPEEVAAKVSSLISVEGLLLMAKIVAKHVVKPEASSIAA
Papaver_setigerum|Pse10G08660.0		MKSQIVFSIFLFFSSICIAESLNYTLISEFEVAAPADDVWALISSKDAHKTFQMLLPGMFEKLEILEGDGGVGTVLLVVFPPGTVPLSNEGKYVTIDNRRRVREILQVKGGYLDMGVTYFMETFEIIPKGCNCVFKSMIRYEVPDELAPDVSSIISVEGILIMAKAAAKYVVDNSKKTPKYSY
Papaver_setigerum|Pse10G13340.0		MKYQIVFSIFLLFSSIYMSESLKYTLISELDVAAPADDVWALIASKDAPKTFEMLLPGMFEKLEIIEGDGGVGTVLLVVYPPGSVPLSNEEKFVTIDNHRRLKEILQTKGGYLDMGVTFYMESFQIFPRGYGSCVFKSMVRYEVPDGLASNVSSLISVEGLLTMAKAAAKYVVDNNKIKSNY
Papaver_setigerum|Pse10G13350.0		MAESLKYTLISEFDVAAPADDVWALIASKDAHKTFQMLLPGMFEKLEIIEGDGGVGTVLLVVYPPGSVPLTNEEKFVTVDDRRRLKEILQTKGGYLDMGVTFYMESFQIFPRGYDSCVFKSMVRYEVPDELAPNVSSLISVEGLLTMAKAAAKYVVDNNKTKPNY
Papaver_setigerum|Pse10G13380.0		MKYQIVFSIFLLFSSIYCAESLKYTLISELDVLGVSADEIWAVFASNDAPKIFQQLLPGVFEKIEVLEGNGGVGSILRITYPKGSVPLTNKEKFVTIDNRRRLKEVLQTEGGYLDMGVTYFMESFQITPKGYNSCIIKSMVRYEVPDAAASNVSPLISVEGLLGMARVAAQYVIDNKKKIAEY
Papaver_setigerum|Pse10G13390.0		MKSQLCFSIFLLFSSIYSTESLKYTLISELDVVGASADEIWALFASNDAPQIFQQLLPGVFEKIEVLEGNGGVGSVLRITYPKGSIPLTNKEKFVTIDNRRRLKEVLQTEGGYLDMGVTFFMESFEIIPKNYKSCIIKSMVRYTVPDAAASNVSHLISIEGLLGMAKVAAKYVIDNKKKIAEY
Papaver_setigerum|PseUNG00520.0		MKSDLVFVVFSFLIMVRKGNSMTYELINEMKVNASANDIWAVYSSPDLPKLVNKFLPGAIERIDYVKGNGGVGTILRIVFPPGSVPLSYKEKFITIDSRRLLKEVLHIEGGYLAMGVTFYIERFKIIKKSCNSCIIRSIIEYEVPDKLAANISPLISVDGFVTMATAISKYVLDNKKNGYIPCLAN
Papaver_setigerum|PseUNG12210.0		MMKPAIFVVVFVFFLMGKGADSMRYELNNEIDVPLSASSIWGVYACKELPKLIVKLLPEVFDRIDYIEGNGGVGTVIRIVFPPGEVPRSYKEMFRKIDHVHRVKEVQQISGGYLAMGVTSYVDKFKIIRTGPNSCTIRSTTEYEVPDHLADKVNTLISIEGLVPMAKAIVEYVKEFGDYGQCLGGNDLAHIALPVEGN
Papaver_setigerum|PseUNG13970.0		MKSDLVFVVFSFLIMVRKGNSMTYELINEMKVNASANDIWAVYSSPDLPKLVNKFLPGAIERIDYVKGNGGVGTILRIVFPPGSVPLSYKEKFITIDSRRLLKEVLHIEGGYLAMGVTFYIERFKIIKKSCNSCIIRSIIEYEVPDKLAANISPLISVDGFVTMATAISKYVLDNKKNGYIPCLAN
Salvinia_cucullata|Sacu_v1.1_s0071.g016800		MAIEVVSDKIQLKVSGKRLWKAVFENAKSVLPKASPEVIEKVVDEGEGFVPGATRTIHFHKSYTEQKAKEKNVEHVILFTKEKVLEVDHHALSLKVETIEGGFLGVLVKFYTTYIRIEETGPDSCILHWTFEYEALPSDHKAHIPHIFKESMTRGLSSAEAFLLSHHDY*
Salvinia_cucullata|Sacu_v1.1_s0071.g016802		MAIEIVSDKLEIKVSAKRLWKTFSEDDATFMTSALPEVIEKVVHEGHGLKPGSVRTIYFKKSFSEKKAKEYNVDHVILFTKEKVLEVDHDALFVKAEIIEGGFLGMLVKKYTNSIHLEDVGPDTCIIHWSFEYEPISEEHKAHIPHILKETFINGMHAGEAYLLSHNEY*
Salvinia_cucullata|Sacu_v1.1_s0071.g016827		MAIEVVSSKVELKVSGKQLWKATFENASSFLPKASLDVIEKVTDEGDCFKAGASTRKRQRRIMQICYLEKLIEVDHHALSLKAEIIEGGFLGLIVKQHISHICVEEIGSNSCILHWTIEYEPLFESHEAHIPHVMKESITEAFCATEAFLLSSFGEKKAKENNAQNVILYTKEKLLEVDHRALSLKAKVIEGGFLGIMVKQYISCIHVKEIGSDSCILHWTIEYESLSDTHKAHIPHVLKESIGEAFCAVETFLLSNNEY*
Daucus_carota|DCAR_002491		MGVVTRTAEARSSKMTAAQLYKSMFIDMDKVMPKILPQIFKSVRLVEGDGGVGTVKEITYAVKATTMIQKLVEMDPEAMTYTKVIIGGDVLMGTLESVAYHSVVESSDSGECVVKLTVVFTPLAGQEVSEDYIKDSIAQSYQTFYAVEAHVQATY*
Daucus_carota|DCAR_020415		MFGTLSGELEVNAPASALWEVYGSLQLAAIVEKGFTDVLEKIEVVEGDGSVGTVLDIVYRPGVAPFPSYKEKFITIDNEKRIKETLAVEGGYLEMGFDRFFVRLEIIEKDEKSSITRATIEYELKEESAANVSMVSIDALMGIMSIANAHILAKTN*
Daucus_carota|DCAR_020417		MLGTVSDEIEVNAPASALWEVYGTLEIAAVVEKGLAALVQKIEVLEGDGSAGTLLNIVFQPGGFAFPSYKEKYTKVDNEKRVKEAEVVEGGYLEIGFNKYLVRFEVIEKDEENSITRATIEYDIKEELVDNASFVSIDPLVGIMNLVANHVLVKKGKMFGTISGEVEVNAPASVVWEVYSSLQLAAIVEKGLTDVVEKIEVVEGDGSVGTVLKLLFRPGVAAFPYYKEKFMMIDHEKRVKDVMVVEGGYLDVGFERYLIRLEIIDKDEKSCITKSTIEYDIKEDYAANASLVSIDPLMVVMNLAAIHILAKTN*
Panax_notoginseng|Pno02G010921.t1		MFGTICDEIEVNATAGAAWEVYGSLKLAELVEKGLPGVIDKIEVVEGDGSAGTILKLVFAPNTQDFWDMKSIMFENSWMLMTSDAFLPTTDLRRSITRTFSAPSNGGRMSACFAVDVQKASSDSTKLGLEVVSKEVMEADGRVMVGTYARTPVVFSNGKGCKLYDVEGREYLDLTSGIAVNALGHGDPDWIRAVTDQANTLTHVSNIFYTVPQVELAKRLIASSFANRVFFSNSGTEANEAAIKFARKFQRFSHPDRKHPPTDFISFSNCFHGRTMGALALTSKEHYRSPFEPVMPGVTFLEYGNIQATTELIRSGNIAAVFVEPIQGEGGIYSATKEFLMSLRTACDDAGALLVFDEVQCGLGRTGYLWAHEDYGVFPDIMTLAKPLAGGLPIGAVLV…
Cynara_cardunculus|rna-XM_025140520.1		MGVLTYTDEHTSSVSPARTFKASIVDSHNLMPKLLPDATKSINIVKGDGGAGTIKSISFIKGDDFVKHHINELNEKTLTYKYTLIEGEGISDKIEKVSYDIKFEGSPDGGTISKMTTTIYTHGDFELKEKLKAGKEEVLGLYKVVEVYLLKNPDAYI*
Cynara_cardunculus|rna-XM_025130061.1		MFGTLSEETEVKVPASKAWALYGTLELGKAVTGKLVEAIEVVEGDGGAGTILRFALKPESGFSRYSEKFTKVDNENKVKEAEVVEGGYLDIGFTLYRIRFEVKENPNDDTGASCIVKLTIEYEVKEEAAANASLITNEPIIGIMSIANKHLLKSG*
Cynara_cardunculus|rna-XM_025131250.1		MCVSSTNVTKMFGTLSEETEVKVPASKAWALYGTLELGKAVTGKFVEAIEVVEGDGGAGTILRFALKPGSRFSRYSEKFTKVDDENKVKEVEVVEGGFLDLGFTFYRSRIEIKENPNDDTGSSCLVKFTIEYDVKEEVAADASLVTNKPLIGIMNIANEYLLKSG*
Cynara_cardunculus|rna-XM_025131264.1		MFGTLLEETEVKVPASKAWALYGTLELEKAMIGKLVEAVEVVEGDGGTGTILNFTLKPGSRFSCYREKFTKVDNENKVKEIEVLEGGFLDFGFTFYRCRIEIKENPNDDTGSSCLVTLTTEYDVKEEAADNASLVTNKPLVSITSIGNEYLLKSG*
Cynara_cardunculus|rna-XM_025130062.1		MFGTLSEETEVKVPASKAWALYGTLELGKVVTGKLVNAVDVVEGDGGVGTILKLTLKPESGFSCYSEKFTKVDNENKVKEAEVVEGGYLDIGFTLYRIRFEVKENPNDDTGASCIVKSTIEYEVKEEAAANASLITNEPIIGIMSIANEHLLKSG*
Cynara_cardunculus|rna-XM_025138724.1		MTSASIEIEIPSSYPADKVFKVFSDFDNIAPKVNPDVFKSIETIEGNGDVGTKKIFTFGDAVPFTSGKYKVDAIDTSNFSYSYSFFDGDCLMGILDSITHHIKVVPCDGGSKFKQTVIYNCKSSDKPSEEILKAEKEIYEKTYKAIEAYGAAHPESY*
Cynara_cardunculus|rna-XM_025138865.1		MTSASIEIEIPSSYPADKVFKVFSDFDNIAPKVNPDVFKSIETIEGNGDVGTKKIFTFGDAVPFTSGKYKVDAIDTSNFSYSYSFFEGDCLMGILDSITHHIKIVPCDGGSKFKQTVIYNCKGSDKPSEEILKAEKEIYEKTYKAIEAYGAAHPESY*
Cynara_cardunculus|rna-XM_025138564.1		MTVVTTEVEIAAAFPADKLFKVIVSFDSLAPKVTPQVFKSISIVEGDGGVGTIKKCIHGDAVPYTTSIQKVDAVDVSNLSVSYTIYEGDALFDFLDSITHHIKISPGADGGSVYKHTTVFNCKGEATVPEEMLTQTNEGYKKVFKAIEAHVLANVDAY*
Cynara_cardunculus|rna-XM_025139122.1		MTSVSIEIEIPSSFPADKVFKVFSDFDNIAPKVNPDVFKSIETVEGNGGVGTKKIFTFGDAVPFTTGKYKVDAIDTSNFSYSYSFYEGDNLLGILDSIAHHIKIIPCADGGSIFKQTVIYNCKGNDKPSEEILKAGKEIYEKTYKAIEAYGAAHPESY*
Cynara_cardunculus|rna-XM_025138965.1		MTSASIEIEIPSSYPADKVFKVFSDFDNIAPKVNPDVFKSIETIEGNGDVGTKKIFTFGDAVPFTSGKYKVDAIDTSNFSYSYSFFDGDCLMGILDSITHHIKVVPCDGGSKFKQTVIYNCKGSDKPSEEILKAEKEIYEKTYKAIEAYGAAHPESY*
Cynara_cardunculus|rna-XM_025138618.1		MTSASIEIEIPSSYPADKVFKVFSDFDNIAPKVNPDVFKSIETIEGNGDVGTKKIFTFGDAVPFTSGKYKVDAIDTSNFSYSYSFFDGDCLMGILDSITHHIKVVPCDGGSKFKQTVIYNCKGSDKPSEEILKAEKEIYEKTYKAIEAYGAAHPESY*
Cynara_cardunculus|rna-XM_025138503.1		MTSASIEIEIPSSYPADKVFKVFSDFDNIAPKVNPDVFKSIETIEGNGDVGTKKIFTFGDAVPFTSGKYKVDAIDTSNFSYSYXFFDGDCLMGILDSITHHIKVVPCDGGSKFKQTVIYNCKGNDKPSEEILKAEKEIYEKTFKAIEAYGAAHPESY*
Cynara_cardunculus|rna-XM_025105187.1		MFGTLSEEVEVKVSADKAWQVYGTLKLGDLAAKYIVDGLEVIEGDGGVGTIVKITFKPGSGISYYKEKFTTVDNERRVKEAEIIEGGYLDFGFTLYRVRFEVKDNPNDEPGSSCLMKTTIEYDVKEEDAANASLATIDPFVALMKVANEHLLCST*
Erigeron_canadensis|rna-XM_043754789.1		MFGTLSEEVEVKVAANKAWRLYNSLELGKLVAKHFLDKLEVIEGDGGVGTILELTYKPEYGLSPCKEKFMKIDNEEMVKEVEVVEGGFFDIGFTLYRVRITIKANPNDENMGESCIVQSTVEYEVKEEAASNASLVTMEALMIVMKVANEHLINSG*
Erigeron_canadensis|rna-XM_043754788.1		MFGTLSEEVEVKVAANKAWRLYNSLELGKLVAKHFLDKLEVIEGDGGVGTILELTYKPVEVKVAASKAWKLYSSLELGKLVAKHFLDKIELVEGDGGVGTILKLTYKPEYGISPYKEKFTKIDNDKMVKEVEIVEGGFLDIGFTLYRVRFAIKANPNDEFTDESCIVQSTIEYEVKEEALSNVSLVTMEPLMIVMNVANQHLINSS*
Erigeron_canadensis|rna-XM_043752975.1		MFGTLVSEDVEIKVEPSKAWKFWSSLDFVKVVSKETLDKLEVEGDGGVGTILNLIFKPGFWVPSYKEKFVKVDHENMVKEAEVVEGGFLDIGFSLYRARIEIKVNPKDETGSSCVVKATIEYEVKEEAASNVSLVNMDRLVYAIKIAGQHLENSS*
Erigeron_canadensis|rna-XM_043755975.1		MFGTLVSEDVEIKVEPSKAWKLWSTLDFVTVVSKEILDKLEVEGDGGVGTVLNLIFKPGFWVSSYKEKFVKIDHENMTKEAEVVEGGFLDIGFSLYRCRFEIKENPKDKTGSSCVVKATIEYEVKEEATSNVSLVNMDQLVYAIKVAGQHLENSS*
Helianthus_annuus|HanXRQChr16g0523481		MAGAVRTGGKGSMRRKKKAVHKTTTTDDKRLQSTLKRIGVNSIPSIEEVNIFKDETVIQFLNPKVQASIGANTWVVSGTPQTKNLQDILPGILNQLGTDNLENLKKLAEQLQKQAPGGAGEGAAATSAQEDDDEVPELVAGETFEAAAEEGQKS*
Helianthus_annuus|HanXRQChr13g0387961		MAGAVRTGGKGSVRRKKKAVHKTTTTDDKRLQSTLKRIGVNAIPGIEEVNIFKDETVIQFSNPKVQASIGANTWVVSGSPQTKKLQDILPGILNQLGADNLDNLRKLAEQFQKQTPGEGPTATTAQEDDDEVPELVAGETFEAAAEEGQKS*
Helianthus_annuus|HanXRQChr13g0397881		MNKQLEKKRQIKQLGIYQYIKKFIPFRHFSYIKSLTSDVHSQRKMFGTLSEEAEVKVPASKAWALYGTLEIGKLVVGKVLEAVDLIEGDGGPGTILKLTLKPGLGFPYYKEKFTKVDNENMIKETEVVEGGFLDVGFTLYRIRFEIKENPNDDTGSSCLQKLTIEYDVKEEFAANASFVTNEPLLGLLKVANEYLLKSN*
Helianthus_annuus|HanXRQChr13g0387971		MCNFTIVEGSNMKLFTPDLVPYIKPPKDSHLGFHTLISSLTIYNYSSLCYLIISKMNVEKLMKMAGAVRTGGKGSVRRKKKAVHKATTTDDKRLQSTLKRIGVNTIPAIEEVNIFKDETVIQFQNPKVQASIAANTWVVSGSPQTKNLQDILPGILNQLGPDNLDNLRKLAEQFQKQSAGADEGATSAAAQDDDDDVPELVAGETFEAAAEEGQKS*
Helianthus_annuus|HanXRQChr03g0090461		MFGSLSEEVEVKVSADKAWQLYGTIKLGEIAAKHTLEHIDVIEGDGGVGTIIKVTFKPGSRVSYCKEKFTMIDNDKMVREVEIIEGGYLDFGFTLYRIRIEVKDNPNDETGSSCVVKMTIEYEVKEEAADNTSLATIEPFVVLMKFANEHLLSST*
Helianthus_annuus|HanXRQChr03g0090441		MFGSLSEEVEVKVPVEKAWDLYGSIKLGDIAAKHILERLDVIEGDGGVGTVIKITFKPGSGISYYNEKYTMIDNDNMVRETEIVEGGYLDFGFTLYRVRIEVKDNPNDKTGSSIVKITIEYEVKEEAVDNASLVTMEPFLVLMKFANEHLLSSA*
Helianthus_annuus|HanXRQChr03g0061591		MAGAVRTGGKGSMRRKKKAVHKTTTTDDKRLQSTLKRIGVNSIPSIEEVNIFKDETVIQFLNPKVQASIGANTWVVSGTPQTKNLQDILPGILNQLGPDNLENLKKLAEQLQKQAPGGAGEGAAAATSAQEDDDEVPELVAGETFEAAAEEGQKS*
Helianthus_annuus|HanXRQChr02g0054511		MYKIILQCAFHQPQISIDKFTKMFGTLSEEAEVKVSASKAWALYGTLELGKLVAGKILEAVDVVEGDGGPGTILKLTLNPGSGFTCYKEKFTKVDNINMVKETEAIEGGFLDMGFNLYRVRFEIKENPKDGSGSSCVLKLTIEYDVKEEFANNASLVTTAPLLGIMSVANEHLLKK*
Helianthus_annuus|HanXRQChr11g0323061		MFGTLSEEAEVKVPASKAWALYGTLEIAKHVIGNALEAVDVIEGDGGPGTILKLTFKPGFPYYYEKFTKVDNENMIKEAEVVEGGFLDVGFTLYRIRFEIKENPNDDMGSSCLQKLTIEYDVKEEFAANASFVTNEPLLGILKVANEYLLKSN*
Lactuca_sativa|Lsat_1_v5_gn_6_115001.1		MAVITVELEVASSYPASKLFKVFSEFDTLAPKLEPETYKAVDIIQGDGGVGTIKTITYGDAVPFTSSKHKVDSVDVSNYSSAYTIFEGDVLMGIVESANHHVKFVPSSDGGSVYKHTVVFTCKGDNTVPEETINLMKEGFKKSFKGFEAYAIAHPEAY*
Lactuca_sativa|Lsat_1_v5_gn_1_58140.1		MGVLTYTDEHISTIPPSRIFKASIIDSHNLMPKLLPDAIKSVEFIKGDGGAGSIKQINFAGGFVKHEIDEMNEKTFTYKYSLIEGMGISDKIEKVSYDIKFEDSSDNGTIAKMTTTIYTHGDFELKEEELNAGKEKVLGLYKVVEAYLLKNPDAYV*
Lactuca_sativa|Lsat_1_v5_gn_1_59700.1		MFGTLSKEVEVKVPADKAWDLYGSIKLGDIAKQILDNLEVVEGDGGVGTIIKITFKPGSEISYYKEKYTMIDDEKKVREAEIIEGGHLDFGFTLYRVRIEVKDNLNDEMGSSCLVKTTIEYEVKEEAKDNAKLATIEPFVVLMKLANEHLLSSI*
Lactuca_sativa|Lsat_1_v5_gn_1_58120.1		MGVITYTDEHTSTIPPSRIFKAAILDSHNLMPKLLPDVIKSIELIKGDGGAGSINQTNFSGGYVKHHVDEVDENTLTYKYSLIEGMGISDKVEKVSYDIKFEATPDNGTISKMTTTIYTHGDFELKEEELNAGKEKVLGLYKVVEAYLLENPDAYV*
Mikania_micrantha|E3N88_mrna24493		MFGTLSEEAEVKVPARKAWALYGTLELGKLVVGKVLEAVDVVEGDGGPGTILKLTLKPGLGFPYYKEKFTKVDNENMIKETEVVEGGFLDIGFTLYRIRFEIKQSPIDESSCLQKLTIEYEVKEEFAANASLVTTEPLLGLMSVANDHLLKSN*
Mikania_micrantha|E3N88_mrna34126		MNVEKLMKMAGAVRTGGKGSMRRKKKAVHKTTTTDDKRLQSTLKRIGVNSIPSIEEVNIFKDETVIQFLNPKVQASIGANTWVVSGSPQTKNLQDILPGILNHLGPDNLENLKKLAERIQKQAPGGAGEGVTATSALEDDDEVPELVAGETFEAAAEEGQKS*
Mikania_micrantha|E3N88_mrna38054		MSGKKSVEVEIKTSSSKAWSVYSSLKVCSVIQSHLGHLIGLDIVEGNGEEGTVAQITPNPDMTTLPPYKEKFTKIDHENKVKVLEVIEGGHLDLGFTCYRMIYEVIDTEKEDSTTVRVTIEYEGPEDVIATADITPVVKVLEVINDCIENDKY*
Mikania_micrantha|E3N88_mrna45673		MSGKKSVEVEIKTSSSKAWSVYSSLKVCSVIQSHLGHLIGLDIVEGNGEEGTVAQITPNPDMTTLPPYKEKFTKIDHENKVKVLEVIEGGHLDLGFTCYRMIYEVIDTEKEDSTTVRVTIEYEGPEDVIATADITPVVKVLEVINDCIENDKY*
Beta_vulgaris|Bv8_196540_tgwd.t1		MSISLKRKLEADIEIRATAADVHYEICSGKPHNISHAAPHFIQAVDLHEGDHGKVGSKCAWKYTLGGKPLVVKSVLEEIDEEKKLVKYRAIEGDMLDEYKTFCGTCQVIPKDEKNCIVKYIFEYEKLHSGVPEPTAWLDAWLAATIDMDDHHHGIKK*
Dianthus_caryophyllus|Dca29489.1		MKGEVCSEVEVNVGANKAWELYGSLELAKFVEQNLPLVHKIEVVQGDGAVGTILNIVFSPGIPGLSSYKEKYTKVDDEKHIKETEVIEGGYLDYGFTMYRVRIEIIDKENRKCVIKSTIEYEVKEEVASNVIDLVTIKPMEDIATSAKTHLEALE-
Camptotheca_acuminata|Cac_g027543.t1		MQGRLSEETDVGVPASMVWDVYKGLELGKLVGQLLPDVLGTVQLIHGDGGVGTVVKLTFPEGTPGVGYLKERFSKIDDEKRVKETETTEGGFKALGFHLYRVRLEIIEKDPESSIIRSTVEYEVDEEHAANVSFLSTEPLGIMAQTIGSYLADKINGKHENDPNSS*
Camptotheca_acuminata|Cac_g010923.t1		MFGTISEEIEVNVGASEAWELYGSLKLAKLIGEELTNVIDKVEVIEGDGGVGTILELTFPPGMPSYKEKFTKVDHEKRVKETEVIEGGYLDLGFTLFRARFEVIEKSQDSCITKSTIEYQVKEEAAASMVSIQPLVKIMEVSANYLIKKKQIN*
Hydrangea_quercifolia|Hyque.07G169400.1.p		MNGTISHELEVNVAASKAWELYGTLGLAKLIGKELSSVVTNIGIIGDGAVGTVLQLTFAPGAPYSYYEEKFTKVDNENRVKETEVIKGGYLDLGYTLYRVRFEVAEKSENSCITKVTIEYELKKEFAANNALVNIPVFVNVLDAAAAGLIQDKTAN*
Hydrangea_quercifolia|Hyque.07G169100.1.p		MIGTISHELEVNVAASEAWELYGTIRIAKLVEKQLSNILEKIDIIEGDGGLGTVLKLTFAPGIAVFSYYKEKFTKIDDEKRVKETEVVEGGYLELGFTLYRVRFEIIEKNENCCFTKATIEYELKEESAANASLVSIQALVSLMEAAATYLTQSKIAN*
Nyssa_sinensis|Nsi01303.t1		MFGTVSEEMEINVGASEAWELYGSLQLAKLVGEELTQVVDKIEVIEGDGGVGTVLKLTFPPGMSVFSCYKEKFTKVDDEKRVKETEVVEGGYLDLGFTLVRARFEVIEKTQISCITKSTIEYELQEGAAANASIVSIQPLVNIMEVAATYLLQNKQTN*
Camellia_sinensis|rna-XM_028256911.1		MLGRVLEEIEVNVPASQAWELYGTLQLAKFIGEELPNVIEKIDVIQGDGGVRTILNIIFPPGTPGFSSYKEKFTKIDDKKRVKETEVVEGGYLDFGFSLFRVRLEIIEKGEESCITGSTIEYEVKEDAAAATTNANASSMVSIQPLVMIMEAASNYLMNLKNNKNKM*
Camellia_sinensis|rna-XM_028270073.1		MLGTVSEEIEVNVSASQAWELYGTLQLTKFAGEELTNVVDKIEIVQGDGGVGTILNLVFPPGTPGFLSYKEKFTKVDDEKRVKEAEVIEGGYLDLGFTLYRVRFEIIEKGEENCITRSTIEYDAKEDAAANASSMISIQPFVLLMEAASNYLTRNNKKKA*
Camellia_sinensis|rna-XM_028270075.1		MYQDQQQQEEERRRKMLGRVSEEMEVKVSASKAWELYGTLQLAKLVEQVLPNVLEKIEIVQGDGGVGTILNLVFPPGTPGGLSSYKEKFTKVDDEKRVKETEVVEGGYLDLGFTLYRVRFEIIEKGEESCITRTTVEYDAKEEVAAMAPSMISIQPFVLLMEAASNSLTKNNKNA*
Catharanthus_roseus|CRO_T139514		MSITTFSDEYTSPISPARIFKASIVDSHNLIPKLMPQVIKNIEIIQGNGGAGSVEQIKFAEGNIIFEYKTFHSTLLKYHIDELNEETYTYKFKLIEGDSLVEKLEKITYEIKFELNAEGGSIPKVTSKYYTKGEFLLKEEEIQVGKAKVLGM
Coffea_canephora|Cc00_g26440.1		MAPITCDYEVTSSVPPARLFKAFILDDNLIPKVFPQAIKSVEIIEGDGGVGTIKLITFGEGCHIKSAKHRVDGLDKNNFTYTYTVTESDAFSAELEKITCVIKIEASADGGSICKTSSTYHIKDSVQVTEEQAEAGKEKIKSAKERALAMFKAVETYLQANPDAYN*
Coffea_canephora|Cc03_g07360.1		MFGRLCEEIEIKVAANEAWKIFGALELGHLAFQQLSDIIHKMEVLEGDGGAGTVIKLSLPGNTYCKEILKVVDQEKRVKIAELIEGGFLDMGFTFYQVRIEVIENAKDENSCTVKFTIEYEVKEDAAANASLVSIRPYVTMMNVGVDYLAKNKNK*
Coffea_canephora|Cc09_g03860.1		MEDPNCSAASPLFKAFILDDNLIPKVFPQAIKSVEIIEGDGGVGTIKLITFGEGCHIKSAKHRVDGLDKNNFTYTYTVTESDAFSAELEKITCVIKIEASADGGSICKTSSTYHIKDSVQVTEEQAEAGKEKIKSAKERALAMFKAVETYLQANPDAYN*
Gardenia_jasminoides|Gj9A757T80.1		MFGRLCEEIEIKVAANEAWKIFGALELAHLGFQQLSDMVHKMEVLEGDGGAGTIIKLSLPGNTYCKEIFKVVDHEKRVKIAEIIEGGLLDMGFTFYQVRIEVIENAKDENSCRVKFTIEYEVKEDAAANASLVSIRPYVTMLNVGVDYLTKNKNK
Gelsemium_sempervirens|augustus_masked-scaffold_14-processed-gene-2.5		MFGAVTDEIEVEVCASKAWKVYGTLQLVDIVLKELPDVVQKIDLLEGDGGVGTVLKLTFPPGLRDVSYQKEKFTVVDDEKRVKVAEVIESGYLDMGFDMWKVRFEVIPKNENSCVTRVTVEYEVKDVAAANLSLATTQVFLAIMNAAAVYLTANNNN
Antirrhinum_majus|Am01g21340.T01		MQGTVSTEKEMDVPASEAWKLYGTLQLAKIVDEALKYMVSKVDVVEGDGGVRTVLHIFFAPGVPGITSYKEKFTVVDNEKRLKEAEVIEGGFLDLGFTLYRVRFEILEKEGVKNKCIIKSTIEYKLKEEAAANAALVSIEPLNVIMEFASQHLVKNYINN
Antirrhinum_majus|Am01g11170.T01		MGITTFNDEHSSPIPPSRIFKASIVDSHNLIPKLMPQAIKSIEIIEGDGGAGSIKQINFAEGSPYKCVKYRIDELNQETFTYGYTLIDGDTLNDKLEKIAYEVKFEQSADGGSISKVTSKYYTIGDFTLKEEEVKAGKERVLAMYKAVEAFLIKNPDAYA
Buddleja_alternifolia|rna-gnl|WGS_WHWC|Bualt03G0028700.1		MAITTFTDEHTSPVHPLRIFKASIVDSHNLIPKLMPQAIKSVEIIKGDGGAGSIKKINFAEGGNFKSVKYRIEELNEETLTYNYTLIEGDALIDKLEKITYEVKFEQTPDRGSVSKVTSKYYTVGDFMLKEEEVKAGKEKVIGMYKAVEAYLLQNPNAYA*
Erythranthe_guttata|rna-XM_013003283.1		MFGTVSSEREVKVPASEAWKVYGTLELSSMVGRTLPSQVSKIDVVQGDGTVGTVLEVFFPPGKPGPRSYKEKFTVVDDEKRVKVVEVVEGGYLDLGFTLYRVRFEVIEKEMKECVTRTTIEYEVREEYAANASLVSIQNFVAVMEAAALHLIQNYVNN*
Genlisea_aurea|mrna.M569_11123		AYASLLSLNRVVDRLQQLHLQGKICLDSFEVGNLRERLQSLIGFFETRPSSKNRSLEADSLCFQLSLFAREAHIIIGEQIVNQLRGDAGSGFASFNEVLLEVIRKIESMEVSLRLNQSSIEKIDYTERRKSPAVEHSGEKLVESSDPNSFSSTAELVAFENRVTWVVYKLTDNETSLQVIPIVGMGGIGKTNLALTVYDLPNVQGRFDRRLWCVISQEYDVKQIIKGLLGDETDDGIAELGKRLYQKLYRRRYLIVMDDVWSITSWEGLRPHLPDNQNGSRIIITTRISTLADSLTTCAKSCALALLDGNTSWDLLRKKIFGESGSCSDELQEIGKEIAKSCRGLPLSLVAVAGLLAKSDMT
Handroanthus_impetiginosus|mrna.CDL12_29486		MAVTTFSDEYTSPVPPSRIFKASIVDSHNLIPKLMPQAIKSIEIIEGDGGAGSIKKINFAEGSPLKSVKYHVDELNEKTLTYGYTLIEGDALVDKLEKITYEVKFEESGDGGSISKVTSKYYTVGDFTLKEEEVKAGKERVLAMYKAVEAFLIQNPDAYV*
Lindenbergia_philippensis|Liphi.01G196200.1.p		MHGTVSDEREVKVPASEAWKLYGTLELAKVIADALPGLVSKIDVVQGDGGVGTLLHLFFPPGTELSSYKEKFVVVDDEKRVKVAEVVEGGYLDLGFTLYRVRFEVIDKEEGSSCVTRATIEYQVKDEAAANAAFVSIQPLVAIMEAAAHHLIQNYNKN*
Mimulus_guttatus|Migut.F00938.1.p		MFGTVSSEREVKVPASEAWKVYGTLELSSMVGRTLPSQVSKIDVVQGDGTVGTVLEVFFPPGKPGPRSYKEKFTVVDDEKRVKVVEVVEGGYLDLGFTLYRVRFEVIEKEMKECVTRTTIEYEVREEYAANASLVSIQNFVAVMEAAALHLIQNYVNN*
Olea_europaea|Oeu062817.1		MFGAISEEREVSVPAGEAWKIYGTLRLAKIVGEALPNLIEKIEVVEGDGGAGTVIKLCFPPGAGLGDYKEKFTVVDDEKRVKETEVVEGGYLDIGFSLYRVRFEVIEKEGNSSSCITKSTIEYEVKEEFAANASYVSIQPLVNIMEVAANCLVGS*
Salvia_miltiorrhiza|Sm06A337T30.1		MSGTISDEKTVNVPASEAWKLYGTLQLAKIVEEALPDLISKIDVVQGDGGAGTVIELFFAPGMEGGLESYKEKFTVVDEEKRVKETEVVEGGYLDMGFRVYRVRLEVREVEGNEKQCITRATIEYELKEEAAANAAALVSIQPLTAIMQISADYLHRTYNNN
Salvia_miltiorrhiza|Sm04A466T45.1		MTEIIDKQEIKSSIPAGRLFKAFVLDSDNILPEILPGVFKSFETIEGDGGVGCIKLVTFAQETQIQAAKHRTEEIDEVKHKFKYSLIEGGILGEDFESITYDIKVEAGPDDVVSVITFVTTYRPKGDNHHAIQEKIKQSQERTEGFVRVVEAHLHAN
Salvia_splendens|Saspl_020918.T1		MATNKFEVEIELKTSPEKLWRNLKEYVTLFPKAMPDVIERVDVIEGDGRSVGTVYVSTSKPTEMSPVVSIIKERIEVVDDKKKILGYSILESDILEYYKNFKVVIYVGSNPKSDGALVKYTAEFNKANENVVVDLDIYKAFVVKLYMAVDAYLLKV
Scutellaria_baicalensis|Sbai1A162T101.1		MFGTISSEKEVKAGASETWKVYGGLELAKIVKEALPGLITKIDVVEGDGGVGTLLQLFFPPGKEGGGMTSYKEKFTVVDEEKRVKETEVVEGGYLDLGFTLYRVRFEIIEKEGKKNECITKATIEYEVKEEAAANAAFVSIQPLVDIMQAAANYLHLQNHI
Scutellaria_barbata|Sbar4A380T151.1		MFGTISSEKEVKVGASDTWKVYSGLELAKIVKEALPGLISKIDVVEGDGGVGTVLQLFFPPGNEGGGMTSYKEKFTVVDDEKRVKETEVVEGGYLDLGFTLYRVRFQIIEKEGDKNECITKATIEYEVKEEAAANAAFVSIQPLVDIMQVVADYLLLNHNL
Sesamum_indicum|rna-XM_011086323.2		MEGRVLEEIEVKVPASEAWKLCGSLLLAKIVGERLPNLFSKAEAIEGDGSAGTILHVFFAPGTAGPPWYKEKFTVVDNERRVKEAEVVEGGFLDLGFTLYRVRLEVIEKEEEECVVRATIEYKLKEEAAGNADLVSIQPLVAMMQVAADYLTNNYTTTTN*
Sesamum_indicum|rna-XM_011086324.2		MVGGVWEEIEVKVPASEAWKLYGSLLLTKVTVEALPDRFSKFEVIEGDGSAGTILHIFLAPGTAGAASYKEKYTVVDNEKRVKEVELVEGGFLDLGFTVYRVRGEVIEKEGKKEECIVRGSIEYELKEEAAGNAALVSIEPLRAIMQIAADYLTKNYTTNV*
Sesamum_indicum|rna-XM_020695556.1		MGVTNVLQKLERGKNAQRWWEDYRRRLRLRYLQSKHGSSTALSNSPKSSAKRFPISSAKSTLYKATAPPEPSSTSFSLQVMVELETGRGGPSSYKEKFTVVDDERRVKETEVVEGGFLDLGFTLYRVRFEVIEKEGNKEECVTRSTVEYELKEEAAANAALVSIEPLVAVMKVAADYLTKNYNNN*
Sesamum_indicum|rna-XM_011086326.2		MVGRLSEEIEVKVPAVEAWKLYSTLQLAKIVGEALPNFISKIDVIQGDGSAGTILHLFFAPGRGGPSSYKEKFTVVDDERRVKETEVVEGGFLDLGFTLYRVRFEVIEKEGNKEECVTRSTVEYELKEEAAANAALVSIEPLVAVMKVAADYLTKNYNNN*
Capsicum_annuum|CAN.T407.17		MAVTTFTEENTSPLPPKRIFKASIVDSHNLIPKLMPQVIKSIEVQGDGGAGSIKTINFPDGGNFKSIKHCVDELNEDTYTYKYTLIEGEGLVDNLEKITYDVRFEQTADGGSISKVTSSYYTVGDFKLKDEEIKAGKEKVLVMFKAVEAYLLQNPEAYA*
Capsicum_annuum|CAN.T407.18		MAVNTFTEENTSPLSPKRIFKASIVDSHNLIPKLMPQAIKSIEVQGDGGAGSIKTINFPDGGNFKSIKYRVDELNEETYTYKYTLIEGDGLADNLEKITYDVKFEQSADGGSISKVTSTYYTVGDFKLKDEEIKAGKEKVLAMFKAVEAYLLQNPEAYA*
Capsicum_annuum|CAN.T407.19		MAVTTFTEENTSPLPPKRIFKASIIDSHNLIPKLMPQAIKSIEVQGDGGAGSIKTINFPDGGNFKSIKYRVDELNEETYTYKYTLIEGDGLVDNLEKITYDVKFEQSPDGGSISKVTSAYYTVGDFKLKEEEIKAGKEKVLAMFKAVEAYLLQNPEAYA*
Capsicum_annuum|CAN.T407.20		MAVTTFTEENTSPLPPKRIFKASIVDSHNLIPKLMPQAIKSIEVQGDGGAGSIKTINFPDGGNFKSIKYRVDELNEETYTYKYTLIEGDGLVDNLEKITYDVKFEQSADGGSISKVTSSYYTVGDFKLKEEEIKAGKEKVLAMFKAVEAYLLQNPEAYA*
Capsicum_annuum|CAN.T524.16		MGAYTFTNESTVPVAPSRLFKALVIDFNHIVCKLMPDVESIENIEGDGGAGTIKKVTFVEGGPMKYLKHKIHVIDEQNLVTKYSLIEGDALANKADSVDYDVKFEASADGGCVGTTVTVYNTIGDYVVTEEEHNLHKARFDAIVTAVVTYLLTNPSAYA*
Ipomoea_trifida|itf04g27240.t1		MVFGAVSDEIEVKAPAAEAWKVYSTLQLAKLIVEMCPDLLEKFEVVEGDGGAGTILKLSFPASTPMFTHSKEKFTVVDDEKRVKEVEVIEGGYLNLGFTLYRVRLEVIEKDERTCTTKTTIEYEVKEESAANASFVSIQSFVAIMNAVATYLTTKV*
Ipomoea_trifida|itf04g27290.t1		MVFGAVSDEMEVKAPAAEAWKVYSTLQLAKLVVEMRPDLVEKFEVVEGDGGVGTILKLSFPASTPVFTYSKEKFTVVDDEKRVKEAEVIEGGYLNLGFTLFRVRFEIIEKDETTCITKTTIEYEVKEESAANASFVSVQTFVEIMNAVATYLTTKQL*
Nicotiana_attenuata|rna-XM_019403252.1		MAVTTFTEEHTSPLPPKRIFKASIVDSHNLIPKLMPQAISSVEVQGDGGAGSIKTINFPEGGKFKSIKYRVDELNEETYTYKYTLVGGDGLVDNLEKISYDVKFEESGDGGSISKVTSTYYTVGDFKLNEEEIKAGKEKVSAMFKVVEAYLLQNPEAYA*
Nicotiana_attenuata|rna-XM_019371762.1		MLGKFSEQVEINASASAVWNLYSTLQFAKFVVEKLPHIVEKVELIEGNGGSGSVMLVSLPGNASYKEKFVSIDDEKRVKEVEIVEGGYLDLGFSFYGIKFEVIEKDENLSIVKMTIDFETKDAENIPLTIGNFQALVAIMKATVEYFNQKSK*
Nicotiana_attenuata|rna-XM_019375551.1		MLGKFSEQAEINASASEVWNLYSTIQFVKFLVEKHIVEKIEFIEGNGGIGSVLQVSFPGNAPYKEKFVSIDDEKRVKVIEMVEGGYLDLGFSFYGFKFEVVNKDENSCIVKITIGFETKDAENIHLTIGNIPAVFAILKATVEYFNEKNKQM*
Nicotiana_attenuata|rna-XM_019375553.1		MLGKFSEQAEINASASEVWNLYSTIQFVKFLVEKHIVEKIEFIEGNGGIGSVLQVSFPGNAPYKEKFVSIDDEKRVKVIEMVEGGYLDLGFSFYGFKFEVVNKDENSCIVKITIGFETKDAENIHLTIGNIPAVFAILKATVEYFNEKNKQM*
Nicotiana_attenuata|rna-XM_019382335.1		MFGTVSEEIEVAAAASEAWKVYGTLQLADIVVKELPHILHKVDIIEGDGGVGTVLKLTFPPGTPLYTCAKEKFIVVDDEKRVKVAMAVEGGLLDHGFTFFLVRFDIIEKDETTCITKATIEYEVKEEAAANVSFVSIQAFVIMMEAVAKYLTQQKNGQCSA*
Petunia_axillaris|Peaxi162Scf00017g00614.1		MGVITYETKTVSSISPAKLFKASVLDADTLIPKILPQAIKTVEILQGDGGAGTIKLITFADGDALMDIIESISYNIKIEPSADGGSICKNISTYHTKGDVEIKEEDIKAGKEKAAGFYTGRAFMLFIKEKPAKQPKPIYVAYTIWQLEKKVRSMIYYYVVKPKRIGPLDP*
Petunia_axillaris|Peaxi162Scf00068g02416.1		MGVLVDSWCFCNGGGKSEKMKASIFSTKGPAMAYIASSGTEIEVAVPASEAWKVYGTLQLANIVVKELPHVLHKVDVIEGDGGVGTVLKLTFPPGTVAKEKFVVVDDEKRVKVALVVEGGVLDHGFTFYQVRFDIIEKDETTCIIRATIEYEVKEEAAANVSFVSIQIFFITSSVLDLTIVGLDVMDGDTNANVQPPHYLKTCSKPNLELGNVVYLLGYSDKKELTVGEGKVVIATDNLIKLSTDGMSWSPGSAGFDVHGNLAFMVCDPMKLATSPISKSSSTSLSSSSSRKDCPMQFGIPIPIICGWLNQHWEGNLDDLNKPKLPVIRLMSAGQKSEYSCASFTMRRVFKSTEAENGGTPSSSNRLSKPREQSGPSCSAVPTNMEEGTDPHAVASGHG…
Petunia_axillaris|Peaxi162Scf00372g00122.1		MFGSISEEIEVPAPANEAWKIIGTLQLADLTVKELPNIVHKVDLIEGDGGLGTVLKVTFPPGTPLLTHHNEKFIVVDDEKMVKIAQVVEGGFLDLGFTLYQVKLEVTENDKTTCIIKTTIEYEVKEEAASNVAYVSIQHFVDIMNLVAKCLTQDKDSQSSA*
Solanum_lycopersicum|Solyc09g059473.1.1		MGVLVDSWCFCNGGGKSERMKASIFSTKGPAMVHIAGAATGFLIHRNLLLTTHAILPSVAAAEAAEIRLQNGVAACLFPHSEAWKVYGTLQLANIVVKELPHVLHKVDVIEGDGGTGTVLKLTFPPGTPLFTYSKERFTVVDDEKKVKVALVVEGGILDHGFTFFQVRFDVIEKSETTCITKATIEYEVKEEAAANVSFVSIQTFVTIMEAVAMYLTQQKDGQ*
Solanum_lycopersicum|Solyc03g117460.1.1		MAVTTFTEENTSPLPPKRIFKASIVDSHNLIPNLMPQAIKSIEVQGDGGAGSIKTINFPDGGNFKSIKYRVDELNEETYTYKYTMIEGDGLVDNLEKITYDVKFEQSADGGSISKVTSSYYTVGDFKLKEEEIKAGKEKVLAMFKAVEAYLLQNPEAYA*
Solanum_lycopersicum|Solyc03g117450.1.1		MAVTTFTEENTSSLPPKRIFKASIVDSHNLIPKLMPQAIKSIEVQGDGGAGSIKTINFPDGGNFKCIKYRVDELNEEAYTYKYTLIEGDGLVDNLEKITYDVKFEQSADGGSISKVTSSYYTVGDFKLKEEEIKAGKEKVLAMFKAVEAYLLQNPEAYA*
Solanum_tuberosum|PGSC0003DMT400008278		MKGTISDEIEVNVPANVAWELYGTLHLSRFIVQELPTLLNKVDVIEGDGSTGTVLKITFPEGTPGIPYFKERFNIVDNEKRYKQSQVIEGGYVDLGYTFYGIRFEVNEKDENSCITKFTINYEVEDVKLASHAFTMFEPLQTVIRSAKTYLTNKTYI*
Solanum_tuberosum|PGSC0003DMT400036665		MAVTTFTEENTSPLPPKRIFKASIVDSHNLIPKLMPQAIKSIEVQGDGGAGSIKTINFPDGGNFKSIKYRVDELNEEAYTYKYTLIEGDGLVDNLEKITYDVKFEQSADGGSISKVTSSYYTVGDFKLKEEEIKAGKEKVLAMFKAVEAYLLQNPEAYA*
Solanum_tuberosum|PGSC0003DMT400036667		MAVTTFTEENTSPLPPKRIFKASIVDSHNLIPKLMPQAIKSIEVQGDGGAGSIKTINFPDGGNFKSIKYRVDELNEDTYTYKYTLIEGGGLVDNLEKITYDVKFEQSTDGGSISKVTSSYYTVGDFKLKEEEIKAGKEKVLAMFKAVEAYLLQNPEAYA*
Carica_papaya|Cpa.t.sc43.101		MEGQVWHEEEVKASAAQAWKLYGGLELAKLAEIVLNNFISRVDLLHGDGGVGTLLKLHFLPGSMGEIEYSVEKFTKIDKEKYVKETEVTEGGYMQMGCSLYRVRFEITEKEKDCCIIKSTIEYKFKPEAAVDPSVISIQPFQLLAQAANNYLINKSITNPN*
Tripterygium_wilfordii|rna-XM_038870314.1		MDGQLSHELELNVPASEAWEFYSTLKLAKLVEEQFDFIEKAEVLEGDGGVGTIIGLTFAPGIPGPVGYKEKFTKLDNENRVKEAEVVEGGYLDLGFTLYRVRFEVIEKGEDSSIIRNTIEYTVKEEAAANASFVSIEPLADIAELVKNHLAKNKTS*
Tripterygium_wilfordii|rna-XM_038870317.1		MDGQLSHELELNVPASEAWEVYSTLKLAKLVEEQLDAIEKAEVLEGDGGVGTIIRLTFAPGIQGPVGYKEKFTKVDNENRVKETEVVEGGFLELGFTLYRVRFEVIEKGKDSSIIRSTIEYTVKEEAAANASFVSIEPLADIAELVKSHLAKNKTS*
Benincasa_hispida|rna-XM_039046039.1		MLGQLRHETGIQAPATVVWQLFGSLELGRLVEKRLSNLFEKIEVVEGDGGEGTVLNLIFAPGLGMPSYKEKFTKIDNENRIKEAEVVEGGYLDIGFTLYRVRFKIIENGEDSCIVESTIEYEIMEEAAANASLVTIQPLIDIAQEANAYLLQNKQPKDA*
Benincasa_hispida|rna-XM_039044704.1		MVREISGETEIQAPAAKVWELYGGLELAKFIPIHLPSLVHKIDVLEGDGGEGTLLHLTFAPGLGGPASYKEKFVKIDNEKRIKIAEMVEGGYLDFGFTLYRFRVEIIEKNNQHSCIVKSTVQYELKEEAAANISFVSVQPLIAIAQAVNNYFLNTSTSHQQA*
Benincasa_hispida|rna-XM_039044760.1		MVSEISNETEIPAPAAKVWELYGTVEFAKFLPLHLPNVIEKIEFLEGDGSEGTLLHVTFAPGLGGARYKEKLVKVDNEKRLKIAQIMEGSYLDQGFSLYRFCFQIIEKDEGSCIVKSTVQYELKEEAAENASLANVQPLIAIAQAAKNYFLNSQQPKDDA*
Citrullus_lanatus|Cla012998		MVSEISDETEIKAPAAKVWELYGTLEFAKFLQLHLPNIIHKVDVLHGDGGEGTLLLVTFGSGLGGASYKEKYVKIDNEKRIKIAEMVEGGHLDLGFTLYRFGFQIFEKNEESCIVKSSVQYELKEEAAANISFATVQPLITIAQAVNNYFLNTQNPKHDP*
Citrullus_lanatus|Cla013001		MVREISDETEIQAPAAKVWELYGGLELAKFLPVHLPNLVHKIDVLEGDGGEGTLLHLTFAPGLGGPTSYKEKFVKIDNEKRIKIAEMVEGGYLDFGFTLYKFRVEITEKNEESCIVKSSVQYELKEEAAANISFATVQPLIAIAQAVNNYFLNAQNPKHQYTCF*
Citrullus_lanatus|Cla013002		MLGQIRQETGIDAPATVAWQLYSGLELARLVENRLSNIFQKIELVEGDGGEGTVLSLIFAPGVGATNCKEKFTKIDNENRIKETEVVEGGFLDIGFTLYRVRFKIIENGEDSCIVESTIEYEIKEEAAANASLVTIQLLIDIAEAANNYLLQNKAA*
Cucumis_melo|MELO3C021886.2.1		MVLGKNKLHIYLSECASSCRKRSNKKMVSELIDETEIQAPAAKVWEIYGTVEFGNFLLHHVPHVVQKIEFLEGNGGEGTLLYVTFAPGLGGMRYKEKFTKVDNENRIKIAEMVEGGYLDLGFTLYRFRFEIIEKNEESCIVKSSVQYELKEEAASNASLATVQPLKEVAQAVNNYFLNKSTA*
Cucumis_sativus|Cucsa.318700.1		MVREISNESEIQAPAAKVWDLYGGLEMVNFIPVHLPNLVHKIDVLQGDGGEGTLLHITFAHGLGGPTSYKEKFVKIDNENRIKIAETVEGGYLDLGFTLYKFRVEIIEKNEESCIVKSTVEYELKKEAASNISLASVQPLVAIAQAVNNYFLNTTRQPHVKGDA*
Cucumis_sativus|Cucsa.318710.1		MVSELIDETEIQAPAAKVWELYGTVEFGNFLLRHVPNVVQKIEFLEGNGGEGTLLYVTFAPGLGGMRYKERFAKVDNENRIKIAEMVEGGYLDLGFTLYRFRFEIIEKNEESCIVKSSIQYELKEEAASNASLATVEPLKEVAQAAKHYFLNKSTA*
Cucurbita_moschata|rna-XM_023087671.1		MLGQLSHEAAIQASATVVWQLYGGLELARLVENRLPNLIKKIEVVEGDGGEGTVLNIIFQPSLGGAPGYKEKFTKIDNENRIKETEVVEGGFLDIGFTLYRVRLKIVENGDDSCIVESTIEYDIKEEDAANASLVSIQPLIDIAQAANDHLLHNKQHKNV*
Cucurbita_moschata|rna-XM_023087672.1		MLGQLSHEAVIQAPATVAWQLYGGLELARLVENRLSNLIQKIEVVEGDGGEGTVLNLIFPPGLGGAPSYKEKFTKIDNENRIKETEVVEGGFLDIGFTLYRVRLKIVENGDDSCIVESTIEYEIKEEAAANASLVTLQPLIDIAQAANDHLLHYKQLKDA*
Lagenaria_siceraria|Lsi10G002660.1		MCVLCVSLLGKKRKMVREISDETEIQAPAAKVWEIYGGLELAKFLPVHLPNIVHKIDVLEGDGGEGTLLHVTFAPGLGGPASYKEKFVKIDNEKRIKIAEMIEGGYLDFGFTLYRFRLEIIEKNNEDSCIVKSSVQYELKEEAAANISFASVQPLIAIAHAVNNYFLNITQQSNDNA
Lagenaria_siceraria|Lsi10G002670.1		MLGQLRHETEIQAPATVAWELFSGLELGRLVEKRLSNLFEKVEVVEGDGGEGTVLNLIFAPGIGAPSYKEKFTKIDNENRIKETEVVEGGFLDIGFTLYRVRFKIIENGEDSCIVESSIEYEIMEEAAANASLVTIQPLIDIAQEANNYLLHNKNPKDA
Momordica_charantia|rna-XM_022292887.1		MVSEISDETEIQAPAARVWEEIYGGLRLGKFLPLHLPNLIEKVEVLEGDGGEGTLLHITFAPGLGGPASYKEKFVKIDNEKRIKIAEMVEGGYLDFGFTVYRFRIEIIEKDEHSCIVKSTVEYELKEEAAQNISLATVQPLVAIAQAANNYFLNTQQPKDA*
Momordica_charantia|rna-XM_022292889.1		MFGELRHESAIQAPAAVVWQLYGGLELGRLVENRLWNLIQKVEVVEGDGGEGTVLNLIFPPGLGATSYKEKFTKIDNEKRIKETEIVEGGFLDLGFTLYRVRLKIIEKDDDTSIVESTIEYELKEEAAANASLVTIQPLIDIAEAANSHLLDIQKA*
Abrus_precatorius|rna-XM_027500525.1		MASWYTSHKHLNCVLKREKMFGQLEHELELHVPASEAWDLFGTLRIGKLVEQELPELFHKVELTQGDGGVGTVLKLSFAPGVPGPAVYKEKFTKIDNEKRIKETEVVEGGYLELGFTLFRVRFEVIEKGEESSIIKSTIEYELKEEDASNASLVSVQPVATIAQLAKNYLNKAAKEPKQ*
Arachis_hypogaea|arahy.Tifrunner.gnm1.ann1.9B2XEY.1		MFGKVEHELELEVAASEAWKLFGTLEIAKFVEKEMPQIFQKVELTEGDGALGTVLKLTFVPGIPGPPSYKEKFTKIDNEKRIKETEVVEGGYLELGFTLFRVRFEVIEKGEDSSIIKSTIEYELKEDHAANESLVSTQILANIAELAKNYLNKNKAPK*
Arachis_hypogaea|arahy.Tifrunner.gnm1.ann1.H4RR8N.1		MFGKVEHELELEVAANEAWKLFGTLEIAKFVEKEMPQIFQKVELTEGDGALGTVLKLTFVPGIPGPPSYKEKFTKIDNEKRIKETEVVEGGYLELGFTLFRVRFEVIEKGEDSSIIKSTIEYELKEDHAANESLVSTQILANIAELAKNYLNKNKAPK*
Arachis_ipaensis|Araip.T5KRF.1		REKMFGKVEHELELEVAASEAWKLFGTLEIAKFVEKEMPQIFQKVELTEGDGALGTVLKLTFVPGIPGPPSYKEKFTKIDNEKRIKETEVVEGGYLELGFTLFRVRFEVIEKGEDSSIIKSTIEYELKEDHAANESLVSTQILANIAELAKNYLNKNKAPK*
Cajanus_cajan|C.cajan_20988		MFGEVEHELELHVPAREAWDLFGGLEIGKLVGRELPELFQKVELIEGDGGLGTVLKLTFAQGVPGPSGYKEKFTKIDNEKRIKETEVVEGGYLELGFTLFRVRFEVIEKGEESSIFKSTIEYEVKEENASNASLVSVQPLVTIAQLAKNYLNKNKHAN*
Cicer_arietinum|Ca_18955.1_v3		MFGEVEHELELHVPASEAWDLFGALRIGKLVEEEMPEMFQKVEITEGDGGVGTVLKLTFAPGIPGPSSYKEKFTKIDNEKRIKETEIVEGGYLDFGFTLFRVRFEVVEKGEDSSIIKSTIEYEVKEEEAANASLVSIQPLVKIVQVAKSYLQRNKAAKEAN*
Glycine_max|Glyma.12G017100.1		MFGQLEHELELHVPASEAWDLFGALEIGKLVAQELPELFQKVELTEGDGGVGTVLKLTFAPGVPGPAGYKEKFTKIDNEKRIKETEVVEGGYLELGFTLFRVRLEVIEKGEESSIIKSTIEYEVKEENAANASLVTIQPVATIAELAKNYLNKNKAAKEAN*
Glycine_soja|GlysoPI483463.12G015600.1.p		MFGQLEHELELHVPASEAWDLFGALEIGKLVAQELPELFQKVELTEGDGGVGTVLKLTFAPGVPGPAGYKEKFTKIDNEKRIKETEVVEGGYLELGFTLFRVRLEVIEKGEESSIIKSTIEYEVKEENAANASLVTIQPLATIAELAKNYLNKNKAAKEAN*
Lotus_japonicus|Lj1g0022825.1		MQLSFISVCCFILQIYTIHTRNTVHCQEQRFCKRSCLANWSMSWRCMCLPAREVWDLFGTLRIGQFVEQEMTELFQKVELIEGDGGVGTVLKLTFAPGIPLTSYKEKFTKIDNEKRIKEVEVVEGGYLEHGFTLYKVTLHVIEKGEDSSALKSTIEYEVKEEDAANASLVSIQPIANIAQLAKNYFSRNKAAN*
Lotus_japonicus|Lj3g0025090.1		MFGKLEHELEMHVPASEVWDLFGTLRIGQFVEQEMTELFQKVELIEGDGGVGTVLKLTFAPGIPGPTSYKEKFTKIDNEKRIKEVEVVEGGYLEHGFTLYRVTFHVIEKGEDSSALKSTIEYEVKEEDAANASLVSIEPVANIAQLAKNYFSRNKAAKEAKQ*
Lotus_japonicus|Lj6g0015610.1		MGVFTFQDETTSTVAPARLYKALTIDGDSIIPKVIPGFKSVETVEGDGGVGTIKKLTFVEGAETKNLLHKIESIDEANFGYHYSIVGGSELPDTVEKISFEAKLVAGSDGGSIAKLTVNYHTKGDASPSEEEIKAGKAKGDGLFKAIEGYVLANPDYN*
Medicago_truncatula|Medtr4g478140.1		MSGQLEHELELNVPASEAWDLFGTIGIGKLVEAEMPELFQKVELIEGDGGVGTILKLTFTPGTPGPASYKEKFTKIDNEKLIKETEVVEGGYLEFGFTLFRVRFEIIEKGEEYSSIIKTTIEYEIKEEHAANASFVSIEPLANIMEVAKNYLNRNKASKEAK*
Medicago_truncatula|Medtr4g478130.1		MFGQLEHELELHVPASEAWDLFGTLAIGKVVEEEMPERFQKVELIEGDGGVGTILKLTFTPGLPGPTGLKEKFTKIDNEKHIKEVEVVEGGCLDLGFTLFRVRMEVIEKGKDSSIIKTTLEYEVKEEEAANVALASIQQLAEIVEVGKNYLNRNKDAKEVK*
Phaseolus_acutifolius|Phacu.CVR.011G022300.1		MLGQLEHELELHVPASEAWDLFGTLRLGQLVAKELPQLFDNVELIEGDGGVGTVLKLTFASGVAGPSGYKEKFTKVDNENRIKETEVVEGGYLELGFTLFRVRLEVIEKGEESSIIKSSIEYEVKEEHASNASFVSVQSLATIAELAKNYLNKNKPSKQAT*
Phaseolus_lunatus|Pl11G0000022000.1.v1		MLGQLEHELELHVPASEAWDLFGTLRIGQFVAKELPQLFDNVELIEGDGGVGTVLKLTFASGVAGPGGYKEKFTKIDNENRIKETEVVEGGYLELGFTLFRVRFEVIEKGEESSIIKSSIEYEVKEEYASNASFVSVQSLATIAELAKNHLNKNKASKEAS*
Phaseolus_vulgaris|Phvul.011G019300.1.p		MLGQLEHELELHVPASEAWDLFGTLRLGQFVAKELPQLFDNVELIEGDGGVGTVLKLTFASGVAGPSGYKEKFTKVDNEKRIKETEVVEGGYLELGFTLFRVRLEVIEKGEESSIIKSSIEYEVKEEHASNASFVSVQSLATIAELAKNFLNKNKPSKEAT*
Senna_tora|rna-gnl|WGS_JAAIUW|TR.Sto04g114110		MFGEAEYELELNVAAGEAWDLFGTLEIGKFVEQQLPHLIQKVEVIEGDGGVGTLLKLTFELGTGGPNSYKEKFTKIDIEKRIKETEVVEGGYLELGFTLFRVRFEIIEKGVDSSIIKITIEYEVKEEAKANASFVSINTLAEIAEAAKIHLNKNKAPN*
Senna_tora|rna-gnl|WGS_JAAIUW|TR.Sto10g345200		MGVFTASEENISTIAPARLFKALVFDGDNLIPKVIEAIQSVEIIEGNGGPGTIKKLTHLEGELHYVKHKVEAVDNENFVYNYSLIEGDKFPDTLEKVSVDTKLEATANGGSVIKVTVTFVTKGDVKPTEEEMKMGKQKGEGLFKAVEGYLLANPDYN*
Spatholobus_suberectus|rna-gnl|WGS_QUWT|mrna.E2542_SST10771		MFGQLEHELELHVPAIEAWDLFGTLRIGKLVAQELPELFQKVELTEGDGGVGTVLKLTFAPGVPGPAGYKEKFTKIDNEKRIKETEVVEGGYLELGFTLFRVRFEVIEKGEESSIIKSTIEYEVKEENAANASLVSIQPVATIAELAKNYLNNNKAAKEAK*
Spatholobus_suberectus|rna-gnl|WGS_QUWT|mrna.E2542_SST10766		MFGQLEHELELHVPAIEAWDLFGTLRIGKLVAQELPELFQKVELTEGDGGVGTVLKLTFAPGVPGPAGYKEKFTKIDNEKRIKETEVVEGGYLELGFTLFRVRFEVIEKGEESSIIKSTIEYEVKEENAANASLVSIQPVATIAELAKNYLNNNKAAKEAK*
Trifolium_pratense|TPR.T8689		MAAGQLEHELELHVPASEAWELFGTLGIGKLVVEEMPQSFQKVELIEGDGGLGTILKLTFTPGVPGPAGYSEKFTKIDHKNRIKETEVVEGGYLVFGFTLFRVRFEVIEKGEDSSIIKSTIEYEVKEEYAANASLVSIQTLVNIVEVAKNYLNRNKTAKEVK*
Vigna_unguiculata|VuCB5-2.11G195000.1.p		MFGELEHELELHVPASEAWDLFGTLRIGQLVAKELPHLFQSVELTEGDGGVGTVLKLTFAPGLPGPRGYKEKFTKIDNENRIKETEVVEGGYLELGFTLFRVRFEVKEKGEDSSVIKSIIEYELKEENASNASLVSIQPLATIAELANTYLNKNKPSKQPN*
Betula_pendula|Bpev01.c0422.g0011.m0001		MHGQVSEDTQVGVPASILWDVYRGLELGKLVDELLPHVLGRVEVVEGDGGVGTIMKVTFPPGSPGTSYLKERVTVIDDNKRLKETEVIEGGFKDLGFNLYRISLEIIEKGTESAVVRSTIEYDVDDKFAENASLVTTKPLETIAEVVGRYLTEKKSTAQLESGT
Betula_pendula|Bpev01.c0422.g0012.m0001		MVRQVSHELEVNVAASEAWEQIYGTLRLTKVVEEAFSGHIKVEVVEGDGGVGTVLKLTFTPGTPFAGLKEKFTKVDHEKRLKEVQVFEGGYLDAGFTLYRVRFENIEKGDDSCIIKTTIEYDIKEEAAANASYVDIEPLVKVAELAKTLLIKNKADKAGADC
Betula_platyphylla|BPChr03G18489		MVRQVSHEVEVNVAASEAWEQIYGTLRLTKVVEEALSGHIKVEVVEGDGGVGTVLKLTFTPGTPFAGLKEKFTKVDHEKRLKEVQVFEGGYLDAGFTLYRVRFENIEKGDDSCIIKTTIEYDIKEEAAANASYVDIEPLVKVAELAKTLLIKNKADKAGAHC*
Betula_platyphylla|BPChr03G18540		MHGQVSEDTQVGVPASILWDVYRGLELGKLVDELLPHVLGRVEVVEGDGGVGTIMKVTFPPGSPGTSYLKERFTVIDDNKRLKETEVIEGGFKDLGFNLYRISLEIIENGTESAVVRSTIEYDVDDKFAENASLVTTKPLETIAEVVGRYLTEKKSTAQLESGI*
Betula_platyphylla|BPChr03G18618		MEANQGEAHAALLAVQLASQHGSSPLILEGDSLSTILAINSPHISSDWSAAHVIADTLQLLSSLPVWTALKVSRCANSFAHHTAKWAASNLVFGSIPNSSPIFSSIRENMFGQVSHEVEVHVEASEAWGLYSTLRLSKLVEKELPGMYDKIELLEGDSGVATLFKLTFPPGMTDCTPEITYYKDRSTEIDHENRIKEAEVCEGGYLDVGFTAYRFRFEINDKDENSCIIKSTIEYELKEEYAANVSFVSIEPLISKNCRNCQRASSQINAKE*
Carpinus_fangiana|Cfa016052.t1		MVGQLSHEVEVNVAASEAWELYGTLRLAKLVKEELSTLLEKTETIQGDGGVGTIFKLTFPLGTPGFTSYSEKFTKVDHEKRLKEVEVIEGGYLDLGFTLYRFRFEIIEKGNDSCIIKSTIEFDVKEEAAANVSYATIEPLAKVAELVKTHLIKNKAAKDAN*
Carpinus_fangiana|Cfa016053.t1		MVGQLSHEVEVKVPASEAWELYGTLRLAKLVGEELSTLFDKIETIEGGGGVGTIVKLTFPAATQRIKFTKVDHEKRLKETEVIEEGYLDMGFTLYRIRFEIFEKGDDSCIIKATIEYDVKEEVAANASYATIEPLVTIIELTKNYLIKSKAAKDAN*
Carpinus_fangiana|Cfa016054.t1		MVGQVSNEVEVNVAASEAWEIYGTLRLPKVVEEALSGLNQKVEVIEGDGGVGTVLKLTFGTAGAPFASLKEKFTKVDHEKRLKEVQVIEGGYLDVGFTFYRVRFEIIEKGDDSCIIKSTIEFDVKEEAAASASYVTIEPLAKVAEFAKTLLIKNKVA*
Carya_illinoinensis|Caril.05G213000.1.p		MVGKLSHEIEVLNVPASEAWELYGTLRLGKLIVEEAFPGVIEKIEKIEGDGEAGTIVKIIPAGTTGSKAYREKFTKVDNEKRLKELEVIEGAYLEMGFTFYRVSFEIVEKGNDSCIIKTTVEYDVKEEAAANASNVVSIEPFAKVAEAAKNHLLKNKTA*
Carya_illinoinensis|Caril.06G033400.1.p		MVSGQLSHEMKIEVPASEAWELYGTLRLANLVEEVSTVMEKIEVLEGDGGVGTVLKLTFVPGTPGLSTSSEKFTKIDNEKRVKETELVEGGYLEMGFTLYRVRFEVIEEGDDSCIIRSTIEYEVKEEAVANASYVTIEPLEGITQIAKSYLTKNKAAK*
Carya_illinoinensis|Caril.07G111200.1.p		MGVISFLQEFESPVDPDRLFKALILDSCNLCPKLLPQHIKSIDIIEGDGGVGSIKQINFAQGIHFKYAKYRIDELDMENFQCRYTITEGDVLGEKLKSIEYEMKFVADHGGGCICKMSSEYYSDQELEFKDEDIEFGKERATEIYKVVETYLLTNPLSYL*
Castanea_dentata|Caden.12G113000.1.p		MLARGQLQSRNKKTSKEVKNIPAYIISFLKQDNIKKGKKKMFGQLSHKLEVNVPASAAWEIYGTLGLSKLLVEDGSAFEKIEILEGDGGSGTILKKTFMPGSHGFTVHKEKFTKLDNEKRMKELEVIEGGYLDLGFTLFRVRFEIIEKDNDSCIIKSTMEYDVKKEAIANISYPNTDLVAKIAEFAKNYLIKNKATENAA*
Castanea_dentata|Caden.12G112400.1.p		MFWQLSHELEVNVPASEAWELYGRLGLAKLLVEDGSIFEKIEVIEGDGRIGTILKKAYTPGSHGFSVQREKFTKYDNEKCMKELEVIEGGYLDLGLTVFHVRFKIIEKDNDLCIIKSTIEYDVKEESVANTLYVTNDIVAKIAKVAKNYLIKNNATKNAA*
Castanea_dentata|Caden.12G112900.1.p		MVGQVSHEVEVNVSASEAWELYGTLQFSKLVEEVLSNFIEKIEVIEGDGGVGTVIKLTFAPGTGFTGCKEKFTKVDNESRVKETEVLEGEFLELGFTLYRDRFEVIEKGNNSCIIRSTIEYELKEDAAANASLVSIEPLANVAELAKNHLLKNKTAKDTK*
Castanea_dentata|Caden.12G112200.1.p		MFGQLSHELEINVPASEAWELYGTLRLAKLLEEDGTLIHKFELTEGDGGIGTILKLTFPPGTPGFTDYKEKFTKLDNEKRLKEAEVIEGGYLELGFTFYHTRFEVIEMDNDSCILRSTIEYDVKEEAAANASYATIDAVAKLAELAKNHLIKNKVSKDTH*
Castanea_dentata|Caden.12G112300.1.p		MFGQLSHELEVNVPASEAWELYSTLRLAKLVEEEPASGIEKVDVIEGDGGAGTILKLTFAGPPLFTVYKEKFTKLDNEKRLKETEVIEGGYLELGFTLYLIRFKVIEKDNDSCIIESTIEYDVKEEDAANASYVTIDALANIAELSKNYLTKNKAAKDEH*
Castanea_dentata|Caden.12G112800.1.p		MFGHLSHELEVNMPASEAWEIYATLGISKLLVEDGSAFEKIEVLEGDGGNGTILKKTFMPGSHGFTVHKEKFTKLDNEKHMKELEVIEGGYLDSGFTLFCVRFEIVEKDNDSCIIKSTIEYNVKKEAAANTSYANTDLVAKISEVAKNYLIKKKATENAA*
Castanea_dentata|Caden.12G112700.1.p		MSGQLSHELEVNVPASEAWELYGKLGLAKLLVEEGSIVEKIEVIEGDGGIGSILKKTYAPVQREKFTKYDNEKRMKELEVMEGGLDLGLTLFCVCFEIIEKDNDSCMIKSTIEYDIKEEAVANTSYVTIDLVAKIAEIAKNFLIKNKATRNAE*
Juglans_regia|rna-XM_018969222.2		MTILIFSKTHSRVSTQLCSHLPEKIMGVKSFLQEFESPIDPDRLFKALILDSCNLCPKLLPQYIKSIDIIEGDGGVGSIKQINFAQGPGIHFKYAKYRVDELDMENFKCRYTITEGDVLGEKLKSIEYEVKFVADHGGCICKMLSEYYSDQELEFKDEDIEFGKERATEMYKVVEAYLLTNPLSYL*
Juglans_regia|rna-XM_018956227.1		MVVGQLYHEMEVKVVARQAWELYGTLLLSKLAKESLSGLVEKSEVLEGDGGVGTKMKITLVPGSASFRTLIEEFTNVDNEKYVKEAEVIEAGYLDLGFTYYRVRFEINEKGDDSSVIKTTVDYDVKEEAAANASYVNIEPMLKIAEATKKYLLENKAAKSAH*
Juglans_regia|rna-XM_018956228.2		MVGKLSHEIEVNVPASEAWELYGTLRLPKLIVEEAFPGIIENIEVIEGDGEAGTIIKIIPGTPGSKAHREKFTKVDNEKRLKEVEVLIEGAYLEMGFTFYRMSFEIVEKGDDSCIIKTKVEYDVKEEAAAPNASNVVSIEPLAKIAEAAKTHLLKNKSSTA*
Juglans_regia|rna-XM_018973425.2		MVSGQLSHEMKIEVPATEAWELYGSLRLANLVEEVSTLIQKIEVLEGDGGLGTVLKLTFVPGTPGLSSYSEKFTKIDNEKRVKETEAVEGGYLEMGFTLYRIRFEVIEEGDDSCIIRSTIEYEVKEEAAANASYVTIEPLEGIAQIAKSYLTKNKAAK*
Quercus_rubra|Qurub.09G114800.1		MFGQLSHELEINVPASEAWELYGTLRLAKLLEEDGTLIQKFEVTEGDGGIGTILKLTFPPGTPGFTYYKEKFTKLDNEKRLKEAEVIEGGYLELGFTFHHTRFEVIEMDSDTCILRTTIEYDVKEEAAANASYATIDAVAKLAELAKNHLVKNKASKDTH*
Quercus_rubra|Qurub.09G115000.1		MFGQLSHKLEVNVPASEAWEIYGTLGISKLLVEDGSTFEKIEALEGNGGSGTILKKTFMPGSHGFTMYKEKFTKLDNEKRMKEIEVIEGGYLDLGFTLFRVHFEIIEKDNDSCIIKSTIEYDIKEEAVANTSYVNTDLVAKIVELVKNYLIKNKATENAA*
Quercus_rubra|Qurub.09G114900.1		MFGQLSHELEVNVPASEAWELYSTLRLAKLVEEEPASGIEKIDVIEGDGGAGTILKLTFAGPPLFTVYKEKFTKLDNEKRLKETEVIEGGYLELGFTLFLIRFEVIEKDNDSCIIKSTIEYDVKEEAAANASHVTIDAVANIAELSKNYLTKNKAAKDEH*
Quercus_rubra|Qurub.09G115200.1		MSRQLSHELEVNVAASEAWELYGRLGLAKLLVEDGSIVEKIEVIEGDGGIGTILKKTYTPGSHGFSVQREKFTKYDNEKRMKELEVMEGGYLDLGLTLFRVRFEIIEKDNDSCIIKSTIEYDIKEEAIANTSYVTTDLVAKIGEIAKNYLIKNKATKNAE*
Quercus_rubra|Qurub.09G115400.1		MVGQVSHEVEVNVSASEAWELYGTLQFSKLVEEVLSNFIEKIEVIEGDGGVGTIIKLIFAPGTGFTGCKEKFTKVDNESRVKETEVIEGGFLELGFTLYRDRFEVIKNGNDSCIIRSTIEYELKEDAAANASLVSIEPLANVAELAKNHLLKSKTAKDEK*
Quercus_rubra|Qurub.09G115700.1		MFRQLSHELEVNVPASEAWEIYGTSRISKLLVEDGSTFEKIEALEGDGGSGTILKKTFMPGSHGCTVHKEKFTKLDNEKRIKEIEVIEGGILDLGFTLFRVRFEIIEKDNDSCIIKSTIEYDIKEEAVANTSYANTDLVAKIAEVAKNYLIKNKAIENAA*
Jatropha_curcas|rna-XM_020678676.1		MRGQQSVETAVGVPAGEVWEAYRGIELGRLVDQLLGDVVGKVEVVEGDGGVGTIVKLTFPPGTPGIGYLKEIFRKMDDENRVKETEVIEGGYKDLGFDVYRIRLEIIEKDRESSIIRSTVEYEIDDTKPELASFVTTKPLEVMAETIGKYLIEKKSAP*
Jatropha_curcas|rna-XM_037636758.1		MKGQLSHELEVSVSASEAWKLYSTLKLAKLVEKELTIIDKIELVEGDGGVGTVIELVFIPGAPGFPGYKKKFIKIDNEKRIKVTDVVEG*YLELGFTLYRVLFEVTEKSEDCCIIKSTIEYEVKEEAVANASIVTIQPLAEIAEIARTYLTKNKSTSV*
Linum_usitatissimum|Lus10036241		MNQLKDPFEAAYEEQEDSPPDSPLATDELDAGPSSPRPPPAAPGSQGAVTVEEDDETTNGDLRLSDPSSSAPPSSSARNKGKMKEEDEDEEEDNMEVELAKLRSTADPDKMAKMQTILSQFTEDQMSRYESFRRSALQKPNMKRLLVSITGTQKISLQVNIVVCGIAKMFVGEVVETARIVMAERRESGPIRPCHLREAYRRLKLEAAVSYQKEEFVEVDESRHRIGVEIVEGGHLEHYGFSFYKTTLQLSTSGVVTVVDVEISHECEREV*
Manihot_esculenta|Manes.15G007700.1		MGVIFYEGQVASTVPPAKLFQKFVIESLSLLPKVLPQALESVVNLQGDGGPGTIRQVHFSNGSFVKETIDAVDKENFIFEYTVIEGDPALMSKELEKICFQIKFEASPDGGSILKRTSKSYTLEGIDVNEEEIKAAQAKTMEAFVGIFKAFEAYILANPDD*
Populus_trichocarpa|Potri.003G088100.1		MKDELSEETLVQAPASAVWSAYRGLELGRLTDKLLGHVVGKVEVIEGDGGVGTIVKLTFPGTSGGYMKEIFRIMDDEKRVKETEMIEGGYIDLGFDVYRIRLEIIEKDAESTVIRSTVKYEFDDTKTELASLVTVKPLQTMAEEIGKYVSEKKYDA*
Salix_purpurea|Sapur.012G037600.1.p		MAALTFTEEFTSTVEAKRLFTAMILEGDSLLPRLLPQVVKSIETIEGNGGPGTVKKLTFAEGQHVKHRIDALDKDNLTHSYTAIDGVILLDKFESIAYDIKFEATPGGGCKGTFVSKYFPKPDAEIKEEEIKEGKEKAAALYKVVEDYLVANPQACA*
Corchorus_olitorius|COL.rna8230		MGVHSQSQPLEHLTNELEVKAPASKVWELYRHLGISQLAAKELKNVIQSIQVLKGDGGVGTVLKLTFVPGNSSYTEKFTVIDDEKRVKVAQGLEGGCLAIGCSVQIVRLDIIEKFKSSSIIKSDIGYAVKKEFEAKHPKPNIQLLAAAAQVAKKFLEHKFI*
Corchorus_olitorius|COL.rna8231		MLKGSIAFVFLVLFSCYMGTIESHELKHLTNELEVNVPASKVWELYRHLGISELAAQELKNVIQSIDVLKGDGGVGTKLKLTFVGNSSYTEKFVVIDDLERVKVAKGLEGGCLAIGCSVQIVRFDIITKTENSCIIKSDIAYAVKKEFEANDPKPNIQLLAAAAQIAKRVLESQQQVV*
Corchorus_olitorius|COL.rna8232		MLKRVAFIFFALLISCYMGIIESQKLKHLTNELEVNVAASKVWELYRYLGISKLAAQELKNMIQSVDVLKGDGGVGTIIKFTFVPGNSSYTEEFTMIDDLKRVKVAKGLEGGCLAMGCSVQIVRFDIIERTHNSCIIKSDIAYAVKKEFKANNPKPDIQLLADFAQVAKRVLESQHGI*
Durio_zibethinus|rna-XM_022861973.1		MVKQISFVFFVLFACYIGVNSQELKQLTNEIELNVPAKQLKNVIQSIDVLKGDGGVGTVLKLTFVPGNSSYTERFTVIDDQKRVKVAQSLQGGCLAIGCSVQIDRFDIIEKNMTSSIIESKIFYAVKKEFEAKDPKPNIQLFAAAAQIAKKFLENQHDA*
Durio_zibethinus|rna-XM_022864144.1		MRGHLSHDTLVEVPAAVIWDIYRSLELGRLLNELLQDEIGTVEVVQGDGGVGTILKITFAPGIPGPTYMKEIFTKIDDEIRVKESEVIEGGYKDFGFEYCGYRLQIIEKDAKSSIIRSSIEYEIDDKLQEIASLVTTKPMEILAVGISKYLREKTSSSN*
Durio_zibethinus|rna-XM_022879457.1		MIWLSSTIYINPIDCTYWNHSRLKSKPKGKKIFIKTKIAKMLKQVSCIFFLAFACCMGVESQKLKHLTDELEVNVPASNVWELYRHLGISMLAAQELTNVIQSVEVLKGDGGVGTILKLTFVPGNSSYTERFIVINDQKRVKVAKGLEGGCLAIGCSVQIVRFDIIEKTNASCIIRSDIAYAVKKEFEANDPKPNIQLLAAAARVAKRLLESTHSA*
Durio_zibethinus|rna-XM_022888872.1		MRGYLSHDTVVEVPAAVIWDVYRSLELGRLLNELLQDVIGKIEVVQGDGGVGTILNVTFPPGTPGPSYMKEMITKIDDEMRVKEAEVIEGGDKDLGFVLYRRRLQIIEKDAESCISRSSVEYEIDDKLEDIASQASTKPLEILAEVVGKYLKEKRSSSN*
Durio_zibethinus|rna-XM_022890235.1		MHGHISQDTLLEVPAVVVWDVYRGLELGKLADELLRDVIGSVEVVHGDGSVGTIVKVTFPPGTPGSSYLKEMFTKIDDEHRLKETEIIEGGFKDAGFELYRIRLQIIEKDAESCIVRSSVEYEIDDKLEEIASMATTKPLEIIAEVIGKYLKEKQSSLN*
Gossypium_barbadense|Gobar.D05G399800.1.p		MLKQFSLVFFVLFACYVGVNSRELKHITKELEVNAPAYEAWELYRNLGLINIIVPKLPNVQSTQVLKGDGGVGTVAKTTFVPDEAGNSSYTEEFIVIDDKKRVKAAKALEGDCLAFGCSVLIVEFDIKEKSQNSCIIKSIISYAVKKEFEAKDPKPTVAVEAITQASKEYLERNN*
Gossypium_barbadense|Gobar.D05G399900.1.p		MLKQFSLVFFVLFACYVGVNSRELKHITKELEVNAPAYEAWELYRNLGLINIIVPKLPNVQSTQVLKGDGGVGTVAKTTFVPGNSSYTEEFIVIDDKKRVKAAKALEGDCLAFGCSVLIVEFDIKEKSQNSCIIKSIISYAVKKEFEAKDPKPTVAVEAITQASKEYLERNN*
Gossypium_barbadense|Gobar.D05G399700.1.p		MLYINPENCRNRETRESFQGLKQAKFQRKRMLKQFSLVFFVLLACYNGVNSQELKHITKELEVNAPASEAWELYRKLGLLKLIDLKLTNIFQSTEVLKGDGGVGTVVKLTFVPGNSSYTEKFTVMDDQRRVKETKGLEGDCLAIGCSVQILEFEIIEKSQNSSIIKSTISYAVKEEFQAKDPKPSIQIVEAIVQSSKKFLERNN*
Gossypium_barbadense|Gobar.A01G066000.1.p		MLKQVSLIFFLIFSSYMRAESQDLKHLTNELEVNVAASRVWKLYRHLGISTLTAQQLKNVIQNVQVLEGDGGVGTMLKFTFAPGNLSYTERFIEVNDEKKVKVAKGLEGGCLAIGCSVQIVRFDIVEKTNDSCIIKSDIAYAVKEEFEANDPKPNIQILAAGAQIAKRYLESSKNDA*
Gossypium_barbadense|Gobar.A01G065900.1.p		MLKQVSLICFLIFSRYMGVESKDLKHLTNELEVNVAASRVWELYRHLGISMLTARELKTVIQSVQVLKGDGGVGTILKLTFVPGNSSYTERFIKIDDEKKVKVAKGLEGGCLAIGCSVQIVRLDIIEKTSDSCIIRSDIGYAMKEEFEANDPKPNIQLLAAAAQIAKRYLESSKNDA*
Gossypium_barbadense|Gobar.D01G066500.1.p		MLKQVSFIFFLIFSSYMRAESQDLKHLTNELEVNVAASRVWELYRHLGISMLTAQQLKNVIQNVQVLEGDGGVGTMLKLTFAPGNLSYTERFIEVNDEKKVKVAKGLEGGCLAIGCSVQIVRFDIVEKTSDSCIIKSDIAYAVKEEFEANDPKPNIQLLAAAAQIAKRFLESSKNDA*
Gossypium_barbadense|Gobar.D01G066400.1.p		MLKQVSLICFLIFSCYMGIKSKDLKHLTNELEVNVAASRVWELYRHLGISMLTARELKTVIQSVQVLKGDGGVGTILKLIFVPGNSSYTERFIKIDDEKKVKVAKGLEGGCLAIGCSVQIVRLDIIEKTSDSCIIRSDIGYAVKEEFEANDPKPNIQLLAAAAQITKRFLESSKNDA*
Gossypium_barbadense|Gobar.A04G031000.1.p		MMKLFSLVFSVLLACYNRVNSQELKHITNEDEVNAPASEAWELYRNLGISELVAQELKNVIQRLDVLEGDGGVGTEIKVTFVPAGNSSYTEKFTVIDDQRRVKETQGLEGDCLAIGCSVQIVEFEIIEKSQNSSIIKSTISYAVKEEFQAKDPKPSIELVEAIVQISKKFLERNN*
Gossypium_barbadense|Gobar.A04G031000.2.p		MMKLFSLVFSVLLACYNRVNSQELKHITNEDEVNAPASEAWELYRNLGISELVAQELKNVIQRLDVLEGDGGVGTEIKVTFVPGNSSYTEKFTVIDDQRRVKETQGLEGDCLAIGCSVQIVEFEIIEKSQNSSIIKSTISYAVKEEFQAKDPKPSIELVEAIVQISKKFLERNN*
Gossypium_hirsutum|Gohir.D05G358900.1.p		MLKQFSLVFFVLFACYVGVNSRELKHITKELEVNAPAYEAWELYRNLGLINIIVPKLPNVQSTQVLKGDGGVGTVAKTTFVPDEAGNSSYTEEFIVIDDKKRVKAAKALEGDCLAFGCSVLMVEFDIKEKSQNSCIIKSIISYAVKKEFEAKDPKPTVAVEAITQASKEYLERNN*
Gossypium_hirsutum|Gohir.D05G358800.1.p		MLKQFSLVFFVLLACYNGVNSQELKHITKELEVNAPASEAWELYRKLGLLKLIDLKLTNIFQSTEVLKGDGGVGTVVKLTFVPGNSSYTEKFTVMDDQRRVKETKGLEGDCLAIGCSVQILEFEIIEKSQNSSIIKSTISYAVKEEFQAKDPKPSIQIVEAIVQSSKKFLERNN*
Gossypium_hirsutum|Gohir.D05G358800.2.p		MLKQFSLVFFVLLACYNGVNSQELKHITKELEVNAPASEAWELYRKLGLLKLIDLKLTNIFQSTEVLKGDGGVGTVVKLTFVPGNSSYTEKFTVMDDQRRVKETKGLEGDCLAIGCSVQILEFEIIEKSQNSSIIKSTISYAVKEEFQAKDPKPSIQIVEAIVQSSKKFLERNN*
Gossypium_hirsutum|Gohir.A04G028300.1.p		MMKQFSLVFSVLLACYNRVNSQELKHITNEDEVNAPASEAWELYRNLGISELVAQELKNVIQRLDVLEGDGGVGTVIKVTFVPGNSSYTEKFTVIDDQRRVKETQGLEGDCLAIGCSVQIVEFEIIEKSQNSSIIKSTISYAVKEEFQAKDPKPSIELVEAIVQISKKFLERNN*
Gossypium_hirsutum|Gohir.D01G053200.1.p		MLKQVSFIFFLIFSSYMRAESQDLKHLTNELEVNVAASRVWELYRHLGISMLTAQQLKNVIQNVQVLEGDGGVGTMLKLTFAPGNLSYTERFIEVNDEKKVKVAKGLEGGCLAIGCSVQIVRFDIVEKTSDSCIIKSDIAYAVKEEFEANDPKPNIQLLAAAAQIAKRFLESSKKDA*
Gossypium_hirsutum|Gohir.D01G053100.1.p		MLKQVSLICFLIFSCYMGIKSKDLKHLTNELEVNVAASRVWELYRHLGISMLTARELKTVIQSVQVLKGDGGVGTILKLIFVPGNSSYTERFIKIDDEKKVKVAKGLEGGCLAIGCSVQIVRLDIIEKTSDSCIIRSDIGYAVKEEFEANDPKPNIQLLAAAAQITKRFLESSKNDA*
Gossypium_hirsutum|Gohir.A01G065800.1.p		MLKQVSLICFLIFSCYMGVESKDLKHLTNELEVNVAASRVWELYRHLGISMLTARELKTVIQSVQVLKGDGGVGTILKLTFVPGNSSYTERFIKIDDEKKVKVAKGLEGGCLAIGCSVQIVRLDIIEKTSDSCIIRSDIGYAVKEEFEANDPKPNIQLLAAAAQIAKRYLESSKNDA*
Gossypium_hirsutum|Gohir.A01G065900.1.p		MLKQVSLIFFLIFSSYMRAESQDLKHLTNELEVNVAASRVWKLYRHLGISTLTAQQLKNVIQNVQVLEGDGGVGTMLKFTFAPGNLSYTERFIEVNDEKKVKVAKGLEGGCLAIGCSVQIVRFDIVEKTNDSCIIKSDIAYAVKEEFEANDPKPNIQILAAGAQIAKRYLESSKNDA*
Gossypium_mustelinum|Gomus.D05G409400.1.p		MLKQFSLVFFVLLACYNGVNSRELKHITKELEVNAPASEAWELYRNLGLINLIDRKLTNIFQSTEVLKGDGGVGTVVKLTFVPGNSSYTEKFTVIDDQRRVKETKGLEGDCLAIGCSVQILEYEIIEKSQNSSIIKSTISYAVKEEFQAKDPKPSIQVVEAIVQISKKFLERNN*
Gossypium_mustelinum|Gomus.D01G071900.1.p		MLKQVSFIFFLIFSSYMRAESQDLKHLTNELEVNVAASRVWELYRHLGISMLTAQQLKNVIQNVQVLEGDGGVGTMLKLTFAPGNLSYTERFIEVNDEKKVKVAKGLEGGCLAIGCSVQIVRFDIVEKTSDSCIIKSDIAYAVKEEFEANDPKPNIQLLAAAAQIAKRFLESSKNDA*
Gossypium_mustelinum|Gomus.D01G071700.1.p		MLKQVSLICFLIFSCYMGIKSKDLKHLTNELEVNVAASRVWELYRHLGISMLTARELKTVIQSVQVLEGDGGVGTILKLIFVPGNSSYTERFIKIDDEKKVKVAKGLEGGCLAIGCSVQIVRLDIIEKTSDSCIIRSDIGYAVKEEFEANDPKPNIQLLAAAAQITKRFLESSKNDA*
Gossypium_mustelinum|Gomus.A04G034200.1.p		MMKQFSLVFSVLLACYNRVNSQELKHITNEDEVNAPASEAWELYRNLGISELVAQELKNVIQRLDVLEGDGGVGTVIKVTFVPGNSSYTEKFTVIDDQRRVKETQGLEGDCLAIGCSVQIVEFEIIEKSQNSSIIKSTISYAVKEEFQAKDPKPSIELVEAIVQISKKFLERNN*
Gossypium_mustelinum|Gomus.A01G068000.1.p		MLKQVSLICFLIFSCYMGVESKDLKHLTNELEVNVAASRVWELYRHLGISMLTARELKTVIQSVQVLKGDGGVGTILKLTFVPGNSSYTERFIKIDDEKKVKVAKGLEGGCLAIGCSVQIVRLDIIEKTSDSCIIRSDIGYAVKEEFEANDPKPNIQLLAAAAQIAKRYLESSKNDA*
Gossypium_mustelinum|Gomus.A01G068100.1.p		MLKQVSLIFFLIFSSYMRAESQDLKHLTNELEVNVAASRVWKLYRHLGISTLTAQQLKNVIQNVQVLEGDGGVGTMLKFTFAPGNLSYTERFIEVNDEKKVKVAKGLEGGCLAIGCSVQIVRFDIVEKTNDSCIIKSDIAYAVKEEFEANDPKPNIQILAAGAQIAKRYLESSKNDA*
Gossypium_raimondii|Gorai.002G073000.1		MLKQVSFIFFLIFSSYMRAESQDLKHLTNELEVNVAASRVWELYRHLGISMLTAQQLKNVIQNAQVLEGDGGVGTMLKLTFAPGNLSYTERFIEVNDEKKVKVAKGLEGGCLAIGCSVQIVRFDIVEKTSDSCIIKSDIAYAVKEEFEANDPKPNIQLLAAAAQIAKRFLESSKNDA*
Gossypium_raimondii|Gorai.009G434200.1		MLKQFSLVFFVLFACYVGVNSRELKHITKELEVNAPAYEAWELYRNLGLINIIVPKLPNVQSTQVLKGDGGVGTVAKTTFVPGNSSYTEEFIVIDDKKRVKAAKALEGDCLAFGCSVLIVEFDIKEKSQNSCIIKSIISYAVKKEFEAKDPKPTVAVEAITQASKEYLERNN*
Gossypium_raimondii|Gorai.009G434300.1		MLKQFSLVFFVLFACYVGVNSRELKHITKELEVDAPAYEAWELYRNLGLINIIVPKLPNVQSTQVLKGDGGIGTVAKTTFVPAAKALEGDCLAFGCSVLIVEFDIKEKSQNSCIIKSIISYAVKKEFEAKDPKPTLPIEAATQASKEYLERETINDS*
Gossypium_raimondii|Gorai.009G434400.1		MLYINPENCRNRETRESFQGLKQAKFQRKRMLKQFSLVFFVLLACYNGVNSQELKHITKELEVNAPASEAWELYRKLGLLKLIDLKLTNIFQSTEVLKGDGGVGTVVKLTFVPGNSSYTEKFTVMDDQRRVKETKGLEGDCLAIGCSVQILEFEIIEKSQNSSIIKSTISYAVKEEFQAKDPKPSIQIVEAIVQSSKKFLERNN*
Gossypium_tomentosum|Gotom.A01G079500.1.p		MLKQVSLIFFLIFSSYMRAESQDLKHLTNELEVNVAASRVWKLYRHLGISTLTAQQLKNVIQNVQVLEGDGGVGTMLKFTFAPGNLSYTERFIEVNDEKKVKVAKGLEGGCLAIGCSVQIVRFDIVEKTNDSCIIKSDIAYAVKEEFEANDPKPNIQILAAGAQIAKRYLESSKNDA*
Gossypium_tomentosum|Gotom.A01G079400.1.p		MLKQVSLICFLIFSCYMGVESKDLKHLTNELEVNVAASRVWELYRHLGISMLTARELKTVIQSVQVLKGDGGVGTILKLTFVPGNSSYTERFIKIDDEKKVKVAKGLEGGCLAIGCSVQIVRLDIIEKTSDSCIIRSDIGYAVKEEFEANDPKPNIQLLAAAAQIAKRYLESSKNDA*
Gossypium_tomentosum|Gotom.D05G417600.1.p		MLKQFSLVFFVLLACYNGVNSQELKHITKELEVNAPASEAWELYRKLGLLKLIDLKLTNIFQSTEVLKGDGGVGTVVKLTFVPGNSSYTEKFTVMDDQRRVKETKGLEGDCLAIGCSVQILEFEIIEKSQNSSIIKSTISYAVKEEFQAKDPKPSIQIVEAIVQSSKKFLERNN*
Gossypium_tomentosum|Gotom.A04G038300.1.p		MMKQFSLVFSVLLACYNRVNSQELKHITNEDEVNAPASEAWELYRNLGISELVAQELKNVIQRLDVLEGDGGVGTVIKVTFVPGNSSYTEKFTVIDDQRRVKETQGLEGDCLAIGCSVQIVEFEIIEKSQNSSIIKSTISYAVKEEFQAKDPKPSIELV*
Gossypium_tomentosum|Gotom.D01G071600.1.p		MLKQVSLICFLIFSCYMGIKSKDLKHLTNELEVNVAASRVWELYRHLGISMLTARELKTVIQSVQVLKGDGGVGTILKLIFVPGNSSYTERFIKIDDEKKVKVAKGLEGGCLAIGCSVQIVRLDIIEKTSDSCIIRSDIGYAVKEEFEANDPKPNIQLLAAAAQITKRFLESSKNDA*
Gossypium_tomentosum|Gotom.D01G071700.1.p		MLKQVSFIFFLIFSSYMRAESQDLKHLTNELEVNVAASRVWELYRHLGISMLTAQQLKNVIQNVQVLEGDGGVGTMLKLTFAPGNLSYTERFIEVNDEKKVKVAKGLEGGCLAIGCSVQIVRFDIVEKTSDSCIIKSDIAYAVKEEFEANDPKPNIQLLAAAAQIAKRFLESSKNDA*
Hibiscus_syriacus|rna-XM_039161418.1		MLRQVSFIFLLIIFCCYSGVESKLGLKHVTDEVEVNVAASRVWKLYRHLGNSFLAAERLKNVIQSVQVSKGDGGVGTILKLTSVPGNSSYTEKFIVINDEKRVKVAKGLEGGRLAIGCSVQIVRLEIIEKSSGSCIIRSDIDYAVKEEFEGDDPKPNIQVIAAAVRVAKRFLENPGTAMSA*
Hibiscus_syriacus|rna-XM_039145541.1		MLKQVSFIFFLVLSCYMGAESRELKHLTNELQVNVAANSVWELYRHLGISRLTAQNLQNVIQNVQVLKGDGGIGTVLKLTFVPGNSSYTERFIVINDERKVKVAKGLEGGCLAIGCSVQIVRFDIIEKTNDSCIIRSDIAYAVKKEFVANDPKPNIQLLAAAAQIAKRFLES*
Theobroma_cacao|TCA.XM_007029548.1		MHGYISEDTLVEVPAAVIWEVYRGLQLGKLVNELIRDVIGEVEVVQGDGSVGTIVKVTFPPGTPGPSYMKEMFTKIDDEIRLKETEIIEGGFKEVGFDLYRIRLQILEKDAESSIVRSSVEYEIDDKLEEIASQVTTQPLKIMAEVIGKYLKERSST*
Theobroma_cacao|TCA.XM_007029549.1		MHRHLSQDTLVAVPATVVWDVYCGLKLGRLVDKLLRDVVGTVKVIEGNGGVGTLIRLTFPPGTGYKKFTKIDDENRVKETEVIEGGSSIEYEVDDKLAEIASHMYCDDFLMLCVTKYVLSSKYVIVRVAFEWTLSRKRTSTVGFEAAIVWDVYRSLDLEMHADELRGDVVGKVEFVEGDGGVGSIVKVTFPLDKHVNLR*
Theobroma_cacao|TCA.XM_007029551.1		MRGHLSQDTVVEVPAAVLWDVFRSLQLAKLVDELLGDVVGKVEVVQGDGGVGTILKIIFPPGTPGPGYMKERFTIIDDEIRLKEAETIEGGFKDVGFDVYRMRLQILEKDAESSIVRSSVDYEIDDKLQELASQATTKPMEILAEVVGKYLKEKLNSTK*
Theobroma_cacao|TCA.XM_007029552.1		MHGHLSQDTQVAVPAAVIWDVYGTLELGRLVNKLLGDVIGSVEVIEGDGGVGTLIKVTFRPGSPVDGYMIEKFTKVDDENRVKETEIVEGGYKALGRRKMRGHLSQDTAVEVPAAVIWDVYRGLQLGKLADELLGDVVGKVEVVQGDGGVGTIVKVTFPPGTPGPGYMKERITIIDDEIRLKEAETIEGGFKDVGFDVYRMRLQILEKDAESSIVRSSVDYEIDDKLQELASQATTKPMEILAEVVGKYLKEKLNSTK*
Theobroma_cacao|TCA.XM_007029553.1		MHGHLSQDTPVAVPAAVVWDVYGTLELGRLVDKLLGDVIGSVEVIEGDGGVGTLVKVTFRPGSPVDGYMIEKFTKVDDENRVKETEIVEGGYKALGFDPFRVRLEILEKDSQSSIIRSSVEYEVDDKLAALASQVSIKPLEMIAEAIGKYLLEKETAQI*
Theobroma_cacao|TCA.XM_007021282.1		MLKQVSFVLFVLLSCNMGVESQKLKHLTNELEVKVAASEVWELYRHLGISMLAAQELKNVIQSVEVLKGDGGVGTILKLTFVPGNSSYTERFTVVNDEKRVKVAKGLEGGCLAIGCSVQIVRFDIIAKTNASCIIKSDIAYAVKKEFEADDPKPNIQLLAAAAQVTKRFLESKHNA*
Corymbia_citriodora|Cocit.K2165.1.p		MVVFTFTNEYISTVPPTRLFKALIMDSHNLIPKLMPQAIKSIDIIQGNGGTGTIRQINFMEGNYVIGIKSHIDELNEETFTYKYTIIDLIEKFESIVHEAKFEPTPESGSKNKVVDTYFTKGDVELKEEDVKARKEIVLGSFKVVKTYLLQNPMLIVEATKALLNKFKKSHE*
Corymbia_citriodora|Cocit.F2850.1.p		MMKEAKTQMTANVGIDSLWKCLSKDLHSILPQVIPNLVQNGEVIEGDGGLGSVILFNFGPDVLNMKYQKEKIVELDESLHRIGLQVIEGGHLDLGFTYYKTLFQLTTISEKQTLVDVVYECETEQTILPSKTTAGALACIKGLENYLLSTDAI*
Corymbia_citriodora|Cocit.A2418.1.p		MFGQVSHETEVKVGAGKAWELYGTLKLALLAKKEFSHIMVDILDGDGGVSTVIKITFGALSYTEKYTKVDHERRVKETEAIEGGFLDMGLSLYRVRFQVIGKDEEESCMIKSTIEYEVPDGRRGFLRCLHHLDQAARGYPRSCQEAIRRPGRRRLNNRNKSIYSGASRPKIL*
Corymbia_citriodora|Cocit.A2419.1.p		MFGQVSHGLEVKVGAAKVWELYGTTKMALLAKEALPDAVVGVDILQGKGEVGTVMKITLAGGFSYKEKFTKVDHENRVKETEAIEGGFLDMGLSLYRVRFQVIGKDEEELCVIKSTIEYEVPEGVSFDVSIISVKLYADVAQVIKNRLTAPASAK*
Corymbia_citriodora|Cocit.A2420.1.p		MFGQVSHGLEVKVGAAKVWELYGTTKMALLAKEALPDTIVNLDILEGQGDVGTIIKITLAGGFSYKEKFTKVDNLNRVKETEAIEGGFLDMGLSLYRLRLEVIGKDEEELCVIRSTIEYQVPDETSFDVSLVSVKLFADIAQVIKNRLTAPAGAK*
Corymbia_citriodora|Cocit.H2619.1.p		MVVFKSTDEYSSPIPAARFFKALIVDCRSLIPKLMPQAIESIDIVQGDGGAGSIMQINFTEGGHVSGRVEVLNEETFTFMYALMEGGPLMEKFESIAYEVKFAPTPDGGSKNRMSSTYYTKDDAELEEEEIKVGRDRGLGIYKAVEAYLLHNLDTYV*
Corymbia_citriodora|Cocit.D0108.1.p		MHFEKKRTPPLPPINMSRSHLLYSKLTNLLSSTLFDHIVYNFPSSSLKTIMGVFTFTNEYISPIPPARLFKALVLDSHNLIPKLMPQAVKSIDIIQGDGGAGTIKQINFVEGNQLSSIKNRMDELNEETFTYKYTIIDLEEKFESIVYEVKFEPTSEGGSKNKMTSTYYTMGDVELKEEDTKVGKERALGMYKVAEAYLLQNPEAYA*
Corymbia_citriodora|Cocit.I0452.1.p		MFGQLSHETEVKVGASKAWELYGTIKLALMVKEHLRDAFLQLDILEGNGGVGTVIKLVLAGGLSYKEKFTKVDHEHRVKETEMIEGGLRDMGFSLYRVRLEVIGKDEEDSCVIKSTVEYEVPDDASVDVSIVSVKPFADIAEIAKKLLTTKTGAN*
Corymbia_citriodora|Cocit.I0453.1.p		MFGQLSHETEVKVGASKAWELYGTIKLALMVKEHLRDAFVQLDILEGDGGVGTVIKFILAGGLSYKEKLTKVDHEHRVKETEMIEGGLRDMGFSSYRVRLEVVGKEEEDSCVVKSTVEYEVPDDDSVDLSIVSVKPFADIAEVAKKLLNSANGPN*
Eucalyptus_grandis|Eucgr.A02978.1		MLGQLSHETEVKVGAGKAWELYGTLKLVLLAKQEFSHTICDVLEGDGGVGTVIKLNFGSLSYTEKYAKVDHERRVKETEAIEGGFLDMGLSLYRLRFEVIGKDEEESCVIKSTIEYEVADGASFDVSIISIKQLADMAEVAKKHLTASASAK*
Eucalyptus_grandis|Eucgr.A02982.1		MSGQVSYETEVKAGAAKVWELYGTTKMALLAKEALPDTIIGLDILEGQGAVGTIIKITLAGGFSYKEKFTKVDHENRVKETEAIEGGFLNMGLSLYRLRLEVIGKDENSCMIKSTIEYEIANGASFDVSLISVKLFADIAEVVKKQLTTLAGAN*
Eucalyptus_grandis|Eucgr.I00674.1		MFGQLSHEAEVKVGASKAWDLYGTIKLALMVKEHLRDTFLQVDILEGDGGVGTVIKLVLAGGFSYKEKFTKVDQEHHVKETEMIEGGLRDMGFSLYRVRLEVIGKEEEELCIIKSTIEYEVPDDGSVDVSIISVKPFADIAEVAKKLLTTSAGAN*
Punica_granatum|rna-XM_031528763.1		MFGEMSHEVEVQVPASEAWDLFGTLRIGKLVANLKQLLHGVELVHGDGGVGTIFELTFAPGVSALTSYKEKYTKVDNENRVKEAEVIEGGFLDLGFTLYLVRFQVFEKGQSSCSVKSTIEYELPDELAASASLVSIEPFVMVLDLAKEHLLSLHGNNKAGPVS*
Punica_granatum|rna-XM_031540169.1		MFGEMSHEMEVEVPASEAWDLFGTLRIGKLVVNLKHLFQSVELVDGDGGVGTILELTFAPGIPGLTSYKEKFTKIDNENRIKETEVVEGGLLDMGFTLYRIHFQVFEKGEASCSVKSTIEYELPNELAANASLVSIDPLVMIFDLAKEHLLSLHGNTKPPAVS*
Cannabis_sativa|rna-XM_030633594.1		MVSGQLSHEMEIKAPASQVWEFYGTIRQLNLIAKQLPNVFEKIDILEGDGGVGTIVHLIFVPGVTRFKSYKEKLTKVDDENRVKEAEVIEGGYLDFGFTLYRVRFEIIDKDQASSIVKSTIEYEVKDESADNVSLVSLDALKAIAFIAQNELTKTNA*
Cannabis_sativa|rna-XM_030632302.1		MVSGQLSHELEIKAPASQVWELYGTLRLVKLIEEQLKSVIEKIQVVEGDGGVGTILHLDFVPGAAKFKSFKEKFTKIDNEQRVKEVEVVEGGFLELGFTLYRVRLEIIEKDEGCSLIKSTIEYEVKDDYAENVCLVSLDILSAVGLMAQNHLNT*
Cannabis_sativa|rna-XM_030631253.1		MVSGQLCHELEIKAPASQVWELYGTLRVAKLIEEQLKSVIEKIDVVEGDGGIGTTLHIDFVPGAARFKSYKEKFTKIDNEQRVKEVEVVEGGYLELGFTLYRICLEIIEKYEDCSIIKSTIKYEIKDDYAENVSIVSLDALAAIALIVQNHLTKT*
Cannabis_sativa|rna-XM_030634100.1		MVSGQVSHELEVAAPAAKVWEIYGTLQLPKLVEENLTTILEKIEVVEGEGGVGTVLNLHFVPGVFKFKSYKEKYTKVDDEKLVKEAEVVEGGYLDFGFTLYRTRFEIIEKKDDESAAAASSIIKSTIEYEVKDDEYSAQNLSLVSIDPLAAIALLAQNQLTNNNTN*
Cannabis_sativa|rna-XM_030632069.1		MVSGQVFHELEVKAAANKVWEIYGNAQELGKLVVNNLKGSIQKIEVVEGDGGVGTLIEFHFAPDGEFKFKSHKEKYTKVDNEKRVKEVEVIEGGYLELGFTLYRVRFEIIEKDEGCSIIKSTIEYDLKDDSVHNLPAVTLDPLAAIALAVQNQVTKN*
Cannabis_sativa|rna-XM_030652428.1		MGVFTYESEFTSSIAPARLFKAFVLDGDNLVPKISPQAVEKVEILEGNGGVGTIKKITFGQGVPFKYVKHKIEAIDKESLTYSYSIIEGDALEGNQLEKITHESKLVASGDGGNVIKTVSKYYSAGDAQVNEEKVKEGEKQATQMLKTVEAYLKDHPEAYN*
Fragaria_vesca|FVE12565.1		MVVGGQVTHELEVQVSASQAWELISTLELAKLIQQTLTDVVEKIEVVQGDGQAGTILRITCAPGVPGPGWQTEKFTVVDNEKRVKVAEVIEGGYLELGFTLFRVRAEIIECSSSSCIIKSSLEYELKEEAAANVAIDSLVSAHPFAKIAEIAKNHLLLQNENNRDYDA*
Fragaria_vesca|FVE12566.1		MVISGKASHELEVEVPASQAWELYGTLGIARLVEQSLSDVISKIEVEQGDGEQGTILKLTFAPGIPGPGWHKEKFTMVDNEKRVKEVEVVEGGYRELGFTFYLIRFEITEAGSSTPSSCIIKTTVEYELKEEAAAMVSFVSVDLFANIAQIAKHHLLKKHTEQLSSQVLV*
Morus_notabilis|rna-XM_010089163.2		MVVGDKLWHKLELPVPASEAWELYGGLQLAKLVEEQFSTLIQKIELVQGDGGLGTILHLSFVPGTGLSDYKEKFTKIDNENRVKETEVVEGGYLDLGFTLYRVRFEIIEKDGDSSIVKSTIEYEVKDEFAVNASVVSIDALANIALLAKNHLTKPKP*
Parasponia_andersonii|PanWU01x14_027180.1		MVSGEEVSQSHELEVKVGASQVWELYSSLRLAQLVEEQLSTVIQKINVVEGDGGVGTVLHLFFVPGAARFSDYKEKFTKVDHEKRVKEAEVIEGGYLDFGFKYLRVRFEIIDKDDRSSIIKSTFEYQLNDDSAANVSLVSIDTLAALSLVVQNHLTPTPTPNLNPIFK*
Prunus_persica|Prupe.2G327600.1		MAIGQVLHELEVNVSASQAWDLYGSLELAKLVEQALPNLIDKVELIQGDGGVGTILKVTFASGSGVHKEKFTKVDHEKRVKEVEVIEGGLVELGLSLYRVRFEIIEKVEADYSSCCCIIKTTIEFDVKEDAAPNTSSLVSIDPFKNIAEVAKTHLLNKQSLPLPRPS*
Rosa_chinensis|rna-XM_024321092.2		MVVGGQVLHELEVKCVRASQAWELTDTLELAKLIQQTLTDIIDNIEVVQGDGQAGTIIKLTFAPGVPGPRWQEEKFTMVDNEKRVKEVEKEADNIDKYLLRIKHARDQLSSVSVNRIDEDIVVVTLNGLPDEYSMIKNVIRACKRLTYLLEGL*
Rosa_chinensis|rna-XM_024318143.2		MVSGQVSHELEVEVSASQAWELYGTLGIARLVEQTFTDVIDKIEVEQGDGEQGTILKLTFAPGFPGPGWHKEKFTMVDNEKRMKEVHVIEGGYLELGFTLYLVRFEIKEAGTPSSCIIRTSIDYELKEEAAASASFVSIDLFANIAEVAKNHFLKNKE*
Trema_orientalis|TorRG33x02_317460.1		MVSGELSQSHELEVNVGASQVWELYSSLRLAQLVEEKLSSVIQKINVVEGDGGVGTVLHLFFVPGAARFSDYKEKFTKVDHEKRVKEAEVIEGGYLEFARFEIIEKDDRSSIIKSTFEYQVNDDSAANVSLVSIDTLAAVSLLAQNHLTPNLNPVFK*
Ziziphus_jujuba|ZJU.XM_016023047.1		MVSGQVSHELEVMVPAGQVWELYGSLRLAYLVQQQLSNLIEKVDVIHGDGGVGTVLQLTFVPGFPSGRVCKEKFTKVDDEKRVKESEVIEGGFLDLGFTLYRVRFEIIEKEDDKESSSIIKSTIEYDVKEEAAANASFVSIKHFADIAETAKNSFTTTTTTTTT*
Acer_yangbiense|Acyan03G0154300.1		MKIQGKITEETVVVGVGAEEMWKVYSGLELGRLVSELLPHDIGTVQPIQGHGGVGTIVKLTFPPGTPGVGYLKEIFTKIDDEKRVKETETIEGGFKAMGFDLYRIRLEILENSADDQSTIIRSTIEYELDENLANFLPFVTIKPLQTMAETIGKYLCEKKKTTA*
Anacardium_occidentale|Anaoc.0005s0396.1.p		MKGQVSAETVVGVPASALWEVYKGLELGRLVDKLLPDVLGKVEVIEGDGGVGTIFKLTFPSGAPGSGYMKEIIRKIDEENRVKETEMFEGGFIELGLESHIIRLEIIEKDGQSSIIRSLIEYEVDDKLCHLASEVTTKPLEIMAEVIGKYLGDQKASA*
Anacardium_occidentale|Anaoc.0005s0395.1.p		MKGQLSAETTVGVAASAVWDVYKGLELGSLVDKLLPDVLGKVEVIEGDGGVGTIIKLTFPPGTPGAGYMKEIFKTIDEEKRVKETEMIEGGFKALGFEYYMIRLEIIEKDSESSIIKSSIEYEVDDKLANLASEVTTKPLEIMAEAIGKYLSNQKASA*
Anacardium_occidentale|Anaoc.0005s0397.1.p		MRTKLSKDTVVATAASVVWDVYRGLELGRLTNQLLPDILGKVEVIEGDGGVGTILKITFPPGTPGVGYMKEMFTKIDQEKRVKETETTEGGFLALGFNLYRACFEIIEKDSASSVIRSTIEYDVDDELLNLASHVTTKQVEILAEAIGKHLSEKKSTV*
Citrus_clementina|Ciclev10012995m		MKGQLSHELEVNVPAGQAWELYGTIKLVKLVEKEYDTVEEIEVVEGDGGVGTILHIKFKPGTPGFAGYKEKFIEIDNEKRVRVTDVVEGGYLDVGFTLFRVIFEIIEKGSDSCIIKSTIEYELREEAAANASFVSIDTVAKIAEISKNYLLNNRD*
Citrus_clementina|Ciclev10022655m		MKGQVSHELEVNVPAAQAWELYGTIKLAKLVEKESDTVEEIEIVEGDGGVGTILHLKFTPGTPGFAGYKEKFIEIDNERRVKVTDAVEGGYLDVGFTLFRVIFEIIEKGSDSCIIRSIIEYELKEEAAANASFVSTDAVAKIAEMAKNYLLNNKA*
Citrus_sinensis|orange1.1g031668m		MKGQVSHELEVNVPAAQAWELYGTIKLAKLVEKESDTVEEIEIVEGDGGVGTILHLKFTPGTPGFAGYKEKFIEIDNERRVKVTDAVEGGYLDVGFTLFRVIFEIIEKGSDSCIIRSIIEYELKEEAAANASFVSTDAVAKIAEMAKNYLLNNKA*
Citrus_sinensis|orange1.1g031651m		MKGQLSHELEVNVPAGQAWELYGTIKLVKLVEKEYDTVEEIEVVEGDGGVGTILHIKFKPGTPGFAGYKEKFIEIDNKKRVRVTDVVEGGYLDVGFTLFRVIFEIIEKGSDSCIIKSTIEYELREEAAANASFVSIDTVAKIAEISKNYLLNNRD*
Mangifera_indica|rna-XM_044622965.1		MKGELSAETTVGVAASAMWEVYKGLELGRLVDKLLPDLLGKVEVIEGDGGVGTIVKLTFPPGTPGAGYMKEIFKTIDEEKRVKETETIEGGFKALGFEYYKIRLEIIEKNGESSIIKSSVQYEVDDKLANLASEVTTKPLEIMAEAIGKYLRDQKASA*
Mangifera_indica|rna-XM_044611524.1		MKGKLSAETTVGVAASAMWEVYKGLELGRLVDKLLPDFLGKVEVIEGDGGVGTIVKLTFPPGTPGAGYMKEIFKTIDEEKRVKETEMIEGGFKALGFEYYKIRLEIIEKNGESSIIKSSVQYEVDDKLANLASEVTTKPLEIMAEAIGKYLRDQKASA*
Phellodendron_amurense|Pamu14G000864.t1		MTEQISYELEVNVPACKAWELYGTLKLAKLVEKESEDYEAIDIVEGDGGVGTIIHLKFPPGTPGFPGYKERFTKIDNEKRIKEAEVIEGGYLEVGFTLFRVILEIKEKGSDSCIIRTAIEYELKEEAVANASLVSIEPLAKVSCELEVEVPAGQAWELYGTLKLAKLVEKESENLEEIVVVEGDGGLGTILHLKFAPGTSGFPGYKEKFTKIDNEKRIKETEVVEGGYLDLGFTLFRVMFEIIEKGCDSCIIKLTIEYELKEEAAANASFVSIEPL*
Phellodendron_amurense|Pamu22G000285.t1		MSGQVSHELEVNVPAGQAWELYGTLKLAKLIEKESKHLEEIEVVEGDGGVGTILHLKFAPELGTSSFAGFKEKFTRIDNEKRVKETEMVEGGYLDVGFTLFRVILEIIEKGNDSCIIKSTIEYQLKEEAAANASFVTIKQLAKIAEISKNYLVNNKV*
Pistacia_vera|rna-XM_031430046.1		MKGQLSAETVVGATASSVWEVYKGLELGRLVDRLLPDVLGKVEVIEGDGGVGTIVKLTFPKGTPGAGYIKEIFKKIDEEKRVEETEMIEGGWFKVLGFESYIIRLEIIEKGGESSIIKSSIEYEVDDKLANLASEVTTRPLEIMAEAIGKCLSNQKAPA*
Pistacia_vera|rna-XM_031391452.1		MKGQLSAETTVGVAASAVWEVYKGLELGRLVDKLLPDVLGKVEVTEGDGGVGTIVKLTFPPGTPGAGYMKEIFKRIDEEKRVKETEMIEGGFKALGFESYIIRLEIIEKGGESSIIKSSIEYEVDDKLANLASEVTTKPLETMAEAIGKYLSDQKACA*
Pistacia_vera|rna-XM_031391466.1		MDPLTTSAEEGTSSPMQDAPTSPIREIFSVLIEEELERVVDQYAISVKKHASQVSAETVVGMAASAMWDIYKGLELGRLMDKLLPDVLGKVEVIEGDGGVGTIVKLTFPTGTPGAGYIKEIFKKIDEEKRVRETEMIEGGFKVLGFESYIIRLEIIEKGGESSIIKSSIEYEVDDKLANLASEVTTRPLEIMAEAIGKYLSNQKASA*
Pistacia_vera|rna-XM_031406139.1		MHGQLSQDTVVAAAASAVWDVYRGLELGRLVNQLLPDVLGKVEVIEGDGSVGTILKVTFPPGTPGTGYMKEIFTKIDEEKRVKEAETIEGGFKALGFNVYRARFEIIEKDSATSVIRSTIEYEVDDELANLASHVTTKQVEILAEAIGKQLCEKKATG*
Poncirus_trifoliata|Ptrif.0003s2915.2.p		MHLVDLPSRLFTLLKVYIKLNRFAKIFKEREREKMKGQVSHELEVNVPAAQAWELYGTIKLAKLVEKESDTVEEIEIVEGDGGVGTILHLKFTPGTPGFAGYKEKFIEIDNERLVKVTDAVEGGYLDVGFTLFRVIFEIIEKGSDSCIIRSIIEYELKEEAAANASFVSTDAVAKIAEIAQNYLLNNKA*
Poncirus_trifoliata|Ptrif.0002s1981.1.p		MTLSGQLETELEAKVSASIFHDVLSCRPHHFSNMTPDHVHGVELHEGEWGKPGTVITWTYKHDGVTEIAKEIVEEIDDEKNLTTFKVIEGHLLDKYNSFYVTVQAIPKGEHSCLARWTIKYEKKSEDVPDPQGIVNLAIEMTKGIEAHHPPKQQQA*
Rhodiola_crenulata|CCG001163.2		MRGTLTNEWPVAAPASAVWSAYRGVELGTLVTKLLSDVLGVVETVEGDGGVGTVMKVTFLPGTPGPGYMKEVFTKMDDEARVKETETIEGGFLALGFDLYRVLLEVLETGEASSVIRSSIEYEIRDELAEMAVHVSTKPLEVVAEAVGKYVVEGYKKG
Vitis_vinifera|GSVIVT01024369001		MFGQVSYDVEVDVPAGDAWELYSTLQLAKVVQEGLSPMLEKVELVEGDGGVGTVVELTLAPPPGAQGPMIYKEKFTKIDNEKRIKETEVVEGGFLDLGFTLYRVCIEIVEKDKDSCVIKLKIEYDVKEEAASNASMVTTKPLEGIASVTTTYLLKMKNANANAN*

## Sheet: Supplementary Table 7
Supplementary Table 7. The homologous gene sequences of characterized CYP719 genes in 245 species.
gene id	rename	sequence
Cinnamomum_camphora|Ccam03T001027.1		MEGLWIIIVAMAMAVVFALENARRRLRSKGSKTMVWPVGPRSLPIIGNLHQLYKGGNLLHVTLASLAQEYGRIMTIWIGSQHPTIIVSDHELAWEVLVSKAQEYAARTLPYMSKFVTADWQTLATSDAGPYWHALRKGLQNSALNPSNISAQVQFQENDIESMTQSLWEEACNNNGVVEPLIQLRRTTVKLVGRLCFGPEFDDDVFVQGMDSAVEDTIRLTGFARLVDVFEFTQYIPGLKLPFEQTYQVKRKIEDLVLPYIARQRKSESPSTNCYLYFLLSQDLPEQVVIFSVFELFLLGVDSTSMATAWALGFLIHDKETQHKLYEEISQGGRDTITVEAVSKLQYLHAVVKESMRLKPIAPLAVPHKAVKDSTLMGMRVLEGTSVLVNLYAVLRDGS…
Cinnamomum_camphora|Ccam08T000299.1		MEAIWTAVAIGIAAAVLIAFGRRQRRNGNPTQWPPGPPKLPIIGNMHQIAKGGDPFHIALTKLARVHGPLMTVWLGAREPNIIVSDQDLAWEVLVSKSSDFAGRQFPAFPYKFVTADYRIIFTSSAGPHWHGLRRGLQNEAIAPQGLAAQAPVQESDMTKMINEMIKEASLNGGVVKPFHHIRRATIRLLSRLCFGPDFSDEDFDTTMDILIEDAMQYSDDFRLVNAFPPARFLPSVKRTIVLTEKLKLRLEECIGRHLTSPPSPNCYAHFLLSQSYPRELAIFSIFEVFALGLDSTGSTTLWALGLLVHNQEAQQKLYQEIREHTTRTEKGIVRADEVGKLEYLQAVVKETMRMKPIAPLAVPHIAMTDTVLKGMPVAEGTPVMVNLYALHYDPKVWD…
Cinnamomum_camphora|Ccam08T000300.1		MELIWTAVAIAIAAAVLMAFGRRQRPDGKQNQWPPGPPKLPIIGNMHQIAKGGDPFHIALTKLAQVHGPLMTVWLGARQPTIIVSDHDLAWEVLVSKSPDFAGREFPALPYKFVTADFRTIVTSNAGPHWHGLRRGLQNEAIGPLGLSVQAPLQESDMTKMINDMIKEASLNGGVVKPFHHIRRATIRLLARLCFGPDFSDEDFDTTMDILIEDAMQYSGDSRLVDAFPPARFLPSVKRTVVLTEKLKLRIAECIGRHLTSPPPPNCYAHFLLSQSFPREVAIFSIFEVFILGVDSTGSTTMWALGLMVQNQDAQQKLYQEIRDHTTRNEKGIVKVGDVGKLEYLQAVVKETMRMKPIAPMAVPHKAVKDTVLKGMPVAEGTTVMVNLYALHYDSKVWD…
Cinnamomum_camphora|Ccam08T000301.1		MEEAIWTAIAIGIAAAVLIMACWRSQRPSGKPTQWPPGPTRLPLIGNMHRILKGGDPFHVAINKLAQVHGPLMTVWFGTRQPTIIVSDHDLVWEVLVSKSPDYAAREFPTLAKLGTADSRTIVSSDAGPHWHSLRRGLQNGAIGPLCISVQAPLQEYDIAQMINDMIKEANLNGGVVKPFHHIRRVTIKLLARLCFGSDFSDEEFDATMDVMVEEAFKYTDDARILDTFRPARFLPSVKRAIMLMEKLKLRVEECIGHHLASPPPPNCYAHFLLSQSFPREVTIFCIFEVFVLGLDSIGSTTMWALGLLAVVKETMRMKPIAPLAVPHKAARDTTLDGLHVAAGTRVMVNLYALHYDPKVWDEPDRFKPERFMESSKEFLGKRGQYSFLPFGAGMRACA…
Cinnamomum_camphora|Ccam08T000302.1		MTVWFGTKQPTIIVSDHDLVWEVLVSKSPENAAREIASIAKSGTADYRTIVSSDAAPLQESDMAQMINNMIKEANLNGGVIKPFHHIRRATIKLLARACIGSDFSDEEFDATMDVMVEEALKYGGDDRIVDTFPPARFLPNVKRAIMQLEKLKILVEECIGHHLASPPPPNCYAHFLLSQRFPREVTIFSIFEVFVLGLDSTGSTTMWALGLLVHNQKAQQKLYQEIRDHATCTEKGEEVGKLEYLQAVVKETMRMKPIAPLAVPHKAARDTTLDGLHVAAGTTVMVNLYALHYDPKVWDERGRFKPEKLSCSNSIINSMNSFIIEMRLVFHISSPLGSGFWLRLPINNYGVPRKEGQCSFLPLGAGMRACAGMEVGKLQLPFAVSNLVNAFHWSNAVE…
Cinnamomum_camphora|Ccam08T000303.1		MEAIWTAVAIGIAAAVLMAFWGRQRQRLSRKPTQWPPGPTRLPLIGNMHQILKGPSLADFRTIVSSNAGPLWHSLRRGLQNGAIGPHSLSLQAPFQESDMAQMINNMIKEANLNGGVVMPFPHIRRAIIKLLARICFGCDFSDEEFDATMDFMVEEGLRYSDDSRILDTFPPSRFLPSIKRAVTQMEKVKLRLMECIGRPLDSPLPPTCYAHFLLSQSFPREVTIFSIFELFLLGVDSTGSTTMWGLGLLMQNQEAQQKLYQEIREHASCNEKGVVKVEEIGKLEYLQAVAKETTRMKPIAPLAVPHQAARDTTLDGLHVAEGTTVLANLYALHYDPKVWDEPERFKPERFLESSKEFLGKRGQYSFLPFGAGMRACAGMEVRKLQLPFAICNLVNAFH…
Cinnamomum_camphora|Ccam08T000304.1		MAFRGRQRQRLSRKPTQWPPGPTRLPLIGNMHQILKGGDPFHVAINKLAQVYGPLMTVWFGTRQPTIIVSDHNLVWEVLVSKSADYAAREIPITLKPVLADFRTIAPFQESDMAQMINNMIKEANLNGGVVKPFPHIRRAIIKLLARICFGCDFSDEEFDATMDFMLEETLWYSDDSRILETFPPARFLPSIKRAVMQMEKVKLRLMECIGRPLDSPLPPTCYAHFLLSQSFPREAAIFSIFELLILGVDSTGSTTMWALGLLMQNQEAQQKLYQEIRDHASCNENGVVKVEEIGKLEYLQAVAKETMRMKPIAPLAVPHQAARDTTLDGLHVAEGTTVFGEPLRSALRPQGVG*
Cinnamomum_camphora|Ccam08T000307.1		MEAIWTAVAIGIAAAVLMAFRGRQRQRLSRKPTQWPPGPTRLPLIGNMHQILKGGDPFHVAINKLAQVYGPLMTVWFGTRQPTIIVSDHNLVWEVLVSKSADYAAREIPITLKPSLADFRTIVSSNAGPLWHSLRRGLQNGALGPHSLSLQAPFQESDMAQMINNMIKEANLNGGVVKPFPHIRRAIIKLLARICFGCDFSDEEFDATMDFMVEEALRYSDDSRILDTFPPSRFLPSVKRAVMQMEKVKLRLMECIGRPLDSPLPPTCYAHFLLSQSFPREVAIFSIFELFLLGVDSTGSTTMWGLGLLMQNQEAQQKLYQEIRDHASCNEKGVVKVEEIGKLEYLQAVAKETMRMKPIAPLAVPHQAARDTTLDGLHVAEGTTVLANLYALHYDPKVW…
Cinnamomum_camphora|Ccam08T000308.1		MEAIWTAVAIGIAAAVLMAFRGRQRQRLSRKPTQWPPGPTRLPLIGNMHQILKGGDPFHVAINKLAQVYGPLMTVWFGTRQPTIIVSDHNLVWEVLVSKSADYAAREIPITLKPSLADFRTIVSSNAGPLWHSLRRGLQNGALGPHSLSLQAPFQESDMAQMINNMIKEANLNGGVVKPFPHIRRAIIKLLARICFGCDFSDEEFDATMDFMVEEALRYSDDSRILDTFPPSRFLPSVKRAVMQMEKVKLRLMECIGRPLDSPLPPTCYAHFLLSQSFPREVAIFSIFELFLLGVDSTGSTTMWGLGLLMQNQEAQQKLYQEIRDHASCNEKGVVKVEEIGKLEYLQAVAKETMRMKPIAPLAVPHQAARDTTLDGLHVAEGTTVLANLYALHYDPKVW…
Cinnamomum_camphora|Ccam08T000310.1		MEAIWTAVAIGIAAAVLMAFRGRQRQRLSRKPTQWPPGPTRLPLIGNMHQILKGGDPFHVAINKLAQVYGPLMTVWFGTRQPTIIVSDHNLVWEVLVSKSADYAAREIPITLKPSLADFRTIVSSNAGPLWHSLRRGLQNGALGPHSLSLQAPFQESDMAQMINNMIKEANLNGGVVKPFPHIRRAIIKLLARICFGCDFSDEEFDATMDFMVEEALRYSDDSRILDTFPPSRFLPSVKRAVMQMEKVKLRLMECIGRPLDSPLPPTCYAHFLLSQSFPREVAIFSIFELFLLGVDSTGSTTMWGLGLLMQNQEAQQKLYQEIRDHASCNEKGVVKVEEIGKLEYLQAVAKETMRMKPIAPLAVPHQAARDTTLDGLHVAEGTTVLANLYALHYDPKVW…
Cinnamomum_camphora|Ccam08T000311.1		MEGIWTAIVICFAAAVLIAFGRRQRRSGKPTQWPPGPTRLPLIGNMHQILKGGDPFHVVINKLAQVYGPLMTVWFGTRQPTIIVSGHDLVWEVLVSRSADYAAREITSIAKSGTADYRTIVSSDAGPHWHSLRRGLQNGAIGPLSLSVQAPFQESDMAQMINNMIKEANLNGGVVKPFQHIRRAAIKLLARLCFGTDFNDEDFEANMDFMVDEALRCNDEARILDTFPPARFLPSVKRTIMKMEKLQLRVEEYIGRHLASPPPPNCYAHFLLSQNFPIGVAISSIFEVFILGLDSTGSTTMWALGLLVHNQEAQQKLYQEIRDHATCTEKGIVKVEEVGKLEYLQAVVKETMRMKPIAPLAVPHRAARDTTLDGLHVAEGTTVLVNLYALHYDPKVWDE…
Cinnamomum_camphora|Ccam08T000312.1		MEAIWTAVAIGIAAAVLIAFRERQRQRLSRKPTQWPPGPTRLPLIGNMHQILKGGDPFHVVINKLAQVYGPLMTVWFGTRQPTIIVSGHDLVWEVLVSKSADYAAREIPSIFKSSTTTYSTISSSDAGPHWHSLRRGFQNGAIGPLSLSVQAPFQESDMAQMINNMIKEANLNGGVVKPFQHIRRATIKLLARLCFGSDFNDEDFEANMDFMVDEALRCNDEARILDTFPPARFLPSVKRTIMKMEKLQLRVEEYIGRHLASPPPPNCYAHFLLSQNFPIGVTISSIFEVFILGLDSTGSTTMWALGLLVHNQEAQQKLYQEIRDHATCTEKGIVKVEEIGKLEYLQAVVKETMRMKPIAPLAVPHRAARDTTLDGLHVAQGTTVLVNLYALHYDPKVW…
Cinnamomum_camphora|Ccam08T000313.1		MNMEAIWTAFAIGIAAAVLLAFGRRQWRNGKPTQWPPSPPKLPIIGNMHQILKGCDPFHIALNKLAQVYGPLITVWLGTRQPTIIVSDHDLAWEVLVSKSPDYAAREFPTLAKLVTADFRTIVSSNAGPHWHSLRRGLQNGAIGPLCISGQAPLQESDMAQMINDMIKEASLNGGVVKPFPHIRRATIRLLARLCFGTDFSDEDFDATMDVLVEDTMKYSDAARLVDAFPPTRFLPSIKRTIKQTEKLKLRIAECIGFHLTTPPPPNCYAHFLLSQSFPREVAIFSIFEVFSLGLDSTGSTTLWALGLLVNNQEAQQKLYQEIRDHAICTDKGIVRVEEVGKLEYLQAVVKETMRMKPIAPLAVPHKAARDTALNGLHVAEGTTVMVNLYALHYDPKVW…
Cinnamomum_camphora|Ccam09T001294.1		MEAIWTAVAIGIAAAVLMAFRGRQRQRLSRKPTQWPPGPTRLPLIGNMHQILKGGDPFHVAINKLAQVYGPLMTVWFGTRQPTIIVSDHNLVWEVLVSKSADYAAREIPITLKPSLADFRTIVSSNAGPLWHSLRRGLQNGAIGPHSLSLQAPFQESDMAQMINNMIKEANLNGGVVKPFPHIRRAIIKLLARICFGCDFNDEEFDATMDFMVEEALRYSDDSRILDTFPPSRFLPSVKRAVMQMEKVKLRLMDCIGRPLDSPLPPTCYAHFLLSQSFPREVAIFSIFELFLLGVDSTGSTTMWGLGLLMQNQEAQQKLYQEIREHAGCNEKGVVKVEEIGKLEYLQAVAKETMRMKPIAPLAVPHQAARDTTLDGLHVAEGTTVLANLYALHYDPKVW…
Corydalis_tomentella|GWHPAORS020156		MEESFWIVTATIVVVFVIATMFRKSSTISSKTEWPAGPKKLPVIGNLHQLGGDVLHVVLANLAKVYGSVMTVWVGSWKPMIVISDIDRAWEVLVNKSNDYSGRDLPEITKIISANWKNIMTADAGPYWTSLRKGLTGHTLAPTNVASQSHLQERDMNNLINRMKNQAASNNGIIKPLDHLKEETVRLLSRLIFGQHFEDEHYVEGIHQALDDLVRISGYASLADAFKFCENLPSHKKSISGVHEILSRVRNLVRPYIVPSPPTNTYLHFLQSQKFTEEVIIACILEVYDLGVDSTAATTVWALTFLVREPEVQEKLYREIQTVIGDRGTVKVEDVSKMTYLQAVMKETMRMKPIAPMAIPHKAVRETTLMGNKIDKNTVVMVNLYAIHHNPKVYPEPYK…
Corydalis_tomentella|GWHPAORS020162		MFKAVAEILMEKPWLLPATLVAVIAIAKFFLGKSSTMKWPIGPKTLPVIGNMHQLGGTDLQVVLANLAKTYGTIMTIWVGSWRPMIVLSDIEKAWEVLVNKSSDYSGRAMPEITEIISAKGKTISTSDSGPHWSNLRKGLQNVALSPQNIAAHSRFQESDIIKMIKTLKQEAASNNGIVQPLDHLKKSTVRLISRLIFGQDFDDDEYVEAMNLAVEELIQISGYARLAEAFYYAKYLPSHKRAVNEVWEANRRVKRIVKPRLSANPPPNCYLHFLSSQDYSEEIIIFAIFEAYLVSVDSTSSSTAWALGFLIREPKVQERLYQELKNCADENGMIKVEDINKLPYLQAVLKETMRMKPIAPLAIPHKAVRETSLAGNKVEPGTLVMVNLYAIHHNPKVW…
Corydalis_tomentella|GWHPAORS031287		MEESFWIVTATIVIVFAIATMFRNSSSISSKTEWPPGPKKIPVIGNLHQLGGDVFHVVMANLAMVYGTVMTVWVGSWKPRIVISDIDSAWEVLVNKSKDYSGRDLPEIVKISSANWKSIMTAYAGPYWTTLRKGLTGHTLAPTNIASQSHLQERDMNNLITIIKNHAASNNEIIKPLGYLKEETVRLLSRLIFGQHFEDENYVEGIHQVLDDLVRISGYASLADAFKLCENLPSHKKSIRRVHEILSSVRNLVRPYIVPNPPTNTYLHFLQSQKFTEEVIIACILEVYDLGVDSTAATTVWALSFLVREPEVQEKLYREIQTVIGNRGTVKVEDVSKMTYLQAVMKETMRMKPIAPMAIPHKAVRETTLMGNKIDKDTVVMVNLYAIHHNPKVYPEPYK…
Corydalis_tomentella|GWHPAORS031290		MAVAEILTEKPWLLPATLVAVIAIAKFFLRKSSTMKWPIGPKTLPIIGNMHQLGGTDLQVVLANLAKTYGTIMTIWVGSWRPMIVLSDIERAWEVLVNKSSDYSGRAMPEITEIISAKGKTISTSDSGPHWSNLRKGLQNVALSPHNIAAQSRFQESDITKMIKTLKQEAASNNGIVQPLDHLKKSTVRLISRLIFGQDFDDDEYVEAMHLAVEELIRVSGYARLAEAFYYAKYLPSHKRAVKEVWEANRRVKRIVKPRLSANPPQNCYLHFLSTQDYSEEIIIFAIFEAYLLGVDSTSSTTAWALGFLIREPKVQERLYQELKNCAGENGMIKVEDINKLPYLQAVLKETMRMKPIAPLAIPHKAVRETLLAGNKVEPGTRVMVNLYAIHHNPKVWIE…
Nelumbo_nucifera|NNU05g00815	NnCYP719A22	MQGNQGLILASVIFVVAIVQMMIRKRRTSPTAMKWPAGPRKLPIIGNMHQLSRADGLFHVALTKLAKVHG SVMTIWLGSWRPTIVVSDDEVAWEVLVNKSSDYAARDHPYIDKIMWAGARTIHTSDASPHWHSLRKGLQS GGLGPLSISGQTHLQEKDIAQMLRDMREEASLNGGLVKPFHHIRRTSVRLLCRLCFGPNFEDAKFSEAID KAIEDIIRISGVGYLADAFFFGRHFPGLKHTFQEACDLKRRVEDLIRPFLRAVPPPNCYLHFLLSNNIPE DVTIFTILEVFTLGIDSTSSTATWALALLTNEQRVQQKLYQDIKKNIDSTQQIVRVEDVSKLQYLQAAVK ETLRLKPVAPLVPHMTATETTLMGTKVAQGTRVVVNLHAIHYNP…
Aquilegia_coerulea|Aqcoe6G281700.1.p		MEVSLWLVSVTLAIVLVIKLFIRMYMSAYSSFSQMKWPTGPKKLPIIGNLHQLGGDVLHVALAKLSNVHGSVMTVWIGAWRPTIVVSEIDKAWEVLVNRSSDYAARDMPEITKFASASWHTIATSDAGTFWQTVRKGLQSGAMAPLNIAAQCQFQERDMKRLIQAMTDEAAKKNNILKPLDHIKKNTMRLLSRLIFGQSFDDDKFIESMHYELDDLIRIGGYAHLAEAFYYAKYLPSHKKAEREAYLVKCRVEELVRPLLTSNPPTNSYLYFLLSQNFPEEVIIFCVFEVYLLGVDSTSSTTTWALAYLIREEAVQEKLYQDIKMTIGDVDLVKIEDVSKLKYLQAVVKETMRMKPIAPLAIPHMTAKDTTLMGTKVAKGTRIMVNLYALHTNQKIWTE…
Aquilegia_coerulea|Aqcoe4G234400.1.p		MEGWIWALTVILLGGLMTIFYDFWKNLYFKSDVMNWPPGPKKLPIIGNLHQLNSGGELVHVNLAKLAQEHGSMMTVWFGSSGPTIIVSNHELAWEVLVNKASDFSSRTLPYMSKLTSADWQTLATSNLGPYWQKLRKGLHNTTLNPHTMSAQTRLQEADVSNMLTSLRIEASSNDGVVKPLLHFRRLTIQLIGRLCFGPQFNDDIFVNSLDDAIEEVIRLSGHARLVDVFELSRYIPGLNLRFEEASRLKHKIEQLFLPYIANHKFSFQTCYLHFLLSQNFSKEIIIFNLFEMFLLAVDSTSTATAWALTFLIHDQQIQQKLYEEVQRETGSEALQAEKVNKLLYLHAVVKETMRMRPIAPLAVPHRAVRDSKLMGTKIVEGTPVMVNLYAVHHDPSIW…
Aquilegia_coerulea|Aqcoe7G429000.1.p		MEVVSLWLVSATLAFVLAITILIRKFTSSSSSSFSQMKWPTGPKKLPIIGNLHQLGGDVLHVALAKLAKVHGSVMTVWIGTWRPIIVISDIDRAWEVLVNKSSDYGARDMPEITKIASASWHTISTSDAGAFWQTVRKGLQSGAMGPLNIAAQAQFQERDMKRLIQALTDEAATNNNIVKPLDHIKKNTVRLLTRLIFGQTFDDDKFVESMHFEIDDIIRISGYAQLAEAFYYAKYLPSHKKAEREAYLVKCRVEELVRPLLSSNPPTNSYLYFLLSQNFSEEVIIFCIFELYLLGVDSTSSTTTWALAYLICEKAVQEKLYQDNRMTLGDVDLVKIEDVNKLKYLQAVVKETMRMKPIAPLAIPHKTAKETTLMGTKVAKGTRIMVNIYALHHNQNIW…
Aquilegia_coerulea|Aqcoe7G155400.1.p		MEVSLWLVSVTLAIVLVIKIFILMYMSAYSSFSQMKWPTGPKKLPIIGNMHQLGGDALHVALAKLSNVHGSVMTVWIGAWRPTIVVSEIDKAWEVLVNKSSDYAARDMPENTKFASASWHTIATSDAGTFWQTVHKGLQSGAMAPLNIAAQCQFQERDMKRLIQAMTDEAAKKNNILKPLDHIKKNTMRLLSRLIFGQSFDDDKFIESMHYELDDLIRIGGYAHLTEAFYYAKYLPSHKKAEREAYLVKCRVEELVRPLLTSNPPTNSYLYFLLSQNFPEEVIIFCVFEVYLLGVDSTSSTTTWALAYLIREEAVQEKLYQDIKMTIGDVDLVKIEDVSKLKYLQAVVKETMRMKPIAPLAIPHMTAKDTTLMGTKVAKGTRIMVNLYALHTNQKIWTE…
Aquilegia_coerulea|Aqcoe7G153500.1.p		MEVSLWLVSVTLAIVLVIKIFIRMYMSAYSSFSQMKWPTGPKKLPIIGNLHQLGGDVLHVALAKLSNVHGSVMTVWIGAWRPTIVVSEIDKAWEVLVNKSSDYAARDMPEITKFASSSWHTIATSDAGTFWQTVRKGLQSGAMAPLNIAAQCQFQERDMKRLIQAITDEAAKKNNILKPLDHTKKNTMRLLSRLIFGQSFDDDKKCRVEELVRPLLTSNPPTNNYLYFLLSQNFPEEVIIFCVFEVYLLGVDSTSSTTTWALAYLIREEAVQEKLYQDIKMTFGDVDLVKIEDVSKLKYLQAVVKETMKMKPIAPLAIPHMTAKDTTLMGTKVAKGTRIMVNLYALHTNQKIWTEPYKFIPERFMQGDQNEGVTNNKAREQSFLPFSAGMRICAGMDLG…
Aquilegia_coerulea|Aqcoe7G153900.1.p		MEVSLWLVSVTLAIVLVIKIFIRMYMSAYSSFSQMKWPTGPKKLPIIGNLHQLGGDVLHVALAKLSNVHGSVMTVWIGAWRPTIVVSEIDKAWEVLVNKSSDYAARDMPEITKFASASWHTIATSDAGTFWQTVRKGLQSGAMAPLNIAAQSQFQERDMKRLIQAMTDEAAKKNNILKPLDHIKKNTMRLLSRLIFGQSFDDDKFIESMHYELDDLIRIGGYAHLAEAFYYAKYLPSHKKAEREAYLVKCRVEELVRPLLTSNPPTNSYLYFLLSQNFPEEVIIFCVFEVYLLGVDSTSSTTTWALAYLIREEAVQEKLYQDIKMTIGDVDLVKIEDVSKLKYLQAVVKETMRMKPIAPLAIPHMTAKDTTLMGTKVAKGTRIMVNLYALHTNQKIWTE…
Aquilegia_coerulea|Aqcoe1G202700.1.p		MEVSLWLVSATFAILLALATLIQKSKSSSSFPEMKWPSGPKKLPIIGNLHQLGGDVLHVALAKLAKVHGGVMTVWIGSWRSIIVISDVDKAWEVLVNKSSDYGARDLTEITKSVTASWRTISTSDVGALWQTLRKGLQNGALGPLNIAAQTQFQEGDMKRLIQAMTDEAAKNNNIVKPLEHIKKNTVRLLTRLIFGQTFDDDKFVESMHYDVDDVIRIGGYARLAEAFYYAKYLPSHRKAVREAYLVKSRVEDLVRPLLSSNPPTNSYLYFLLSQNFPEEVIIFSIFELYILAVDSTSSTTTWALAYMVREQAVQEKLYQDTRMTLGDVDLVKIEDVSKLKYLQAVVKETMRMKPIAPLAIPHKAAKDTTLMGIKVAKGTQIMVNLYALHHNENIWTEA…
Aquilegia_coerulea|Aqcoe1G202500.1.p		AFFATFAILLALTTLIRMFTSSSSLSQIKWPTGPRKLPMIGNLHQLGGDVLHVALAKLAKVHGGVMTVWIGSWQPIIVISDIDKAWEVLVSSDYGARNLPEITKPVSANWHTISTSDAGAFWQTLHKGLQSGALGPLNIAAQSQFQQRDMKRLIQAMTDEAAKNNNIVKPLEHIKKNSFIESMHYDVNDVIHIGGYARLAEAFYYAKYLPSYRKAEREIYLVKCRVEELVSPLLSLNPPTNSYLRSYHLCIFEMYILAVDSTSSTTTWALAYLVREQAVQEKLYQDTRMTLGDDDLVKIVDVSKMKPIAPLAIPHKAAKDTTLMGTKVAKGTQIIVNLYALHHNENIWTEAYKFIPERFMQGEDGSATNRAMEQSFLPFGAGMQICGGMDLGKLQFAFV…
Coptis_chinensis|Cch00017825-PA		MEMSPLLVCATVAIVFATTTIIRILFSSSSLPQMKWPSGPRKLPIIGNLHQLGDDVLHVALAKLAKVHGSVMTIWIGSWRPVIVISDLEKAWEVLVNKSADYGARDMPEITKIASASWHTISTSDAGPFWQNVRKGLQSGAMGPFNVAAQNQYQERDMKRLIKAMSDEAANNNGIVKPLDHIKRTLSDIIRISGYARLAEAFYYAKYLPSHKKAEREAFLVKCRVEELVRPLLSSNPPTNSYLYFLLSQNFEEEVIIFCIFELYLLGVDSTSSTTTWALAYLIREQGAQEKLYQDIRMTLGDVDLVKIEDVNKLKYLQGVVKETMRMKPIAPLAIPHKTAKETTLMGTKVAKGTRIMVNLYALHHNQNIWPDPYKFMPERFLEGETGTAYNKAMEQSFL…
Coptis_chinensis|Cch00005300-PA		MALRNMVTMIAEMEGSLLFAGATLAIVLTISTIVRITSSSSSFSQMTWPSGPKKLPIIGNLLQLRGELLHVTLAKLAKVHGGVMTIWMGSWVPIIVISDINSAWEVLVNKSVDYGAREVTYLHELLRDSAMHPHSISSSDVGPLWHNIRKGLQSGALNPLSVASQTQHRERDMKRVVHEMSIEIANNNDTIKPLDHIKNSTARLLGRLIFGPSFNDNKFIESMLYEIEDFIRTSSYTFLTNSFYYAKYLPSQRKATREAKLGKYRIEELVRPLLSSKPPTNAYLYFLLSQNLSEEVTIFCIFELFLLGVDSASSTTTWALAYMIREQEAQEKLYQDIRMTIGDVDLVKIEDVNKLKYLQAVVKETMRMKPIAPLALPHNAGKDTTLMGTKIVKGTRVMV…
Coptis_chinensis|Cch00010495-PA		MHPHNISSSDVGPLWYNIRKGLQSGALSPLSVASQTQHRERDMERVVHEMRREIANNNGTIKPLDHIKNSTARLLGRLIFGPSFNDNKFIESMLYEVEDVIRTSNCTFLTNSFYYAKYLPSQRKATREAKLGKYRIEELVRPLLSSKPPTNAYFASSTTTWALAYMIRKQEAQEKLYQDIRMTIGDVDLVKIEDVNKLKYLQSVVKETMRMKPIAPLALPHNAGKDTTLMGTKIVKGTRVIVNLYALHHNEDIWHEPYKFMPERYLQGEVGSVTHKAMEQSLLPFGAGMRICAGMDLGKLHVAFVLANLVNDFKWSCVEEGNLPDMTEELFAIILMKTPLEGRISPRKVCG*
Macleaya_cordata|mrna.BVC80_1765g10		MEEISMQWISTTVIVVVVFAIMASTMFNSGRKSSMKWPDGPKTLPIIGNMHQLGGTALQVLLHKLADVYGSVMTIWIGSWRPVIVVSDIDKAWEVLVNKSSDYSARDMPEITRINTANWRTISTSDSGPHWSNLRKGLQNVALSPLNVAAQSQFQERDIEQLIKNLQEEAALNNGIVKPLDHLKKATVRLLSRMIYGQNFNDDEYVEAMHNEIEELIRISGYARLAEAFYYAKYLPSHKKVEKAVEEAHHRVKALIRPFLTRNPPPNSYLHFLHSQNYSEEVIIFCIYEVYLLGVDSTSSTTAWALAFLIREPAVQEKLYQELNNFIGGRQQMVGSAVKVEDVNKLQYLQAVMKETMRMKPIAPLAIPHKACKDTSLGGNRVDKGTRVMVNLHAIHHNL…
Macleaya_cordata|mrna.BVC80_41g7		MEESFWLVTASVIVVFALAKLLRKSSSISKMEWPAGPKKLPIIGNLHQLGGDVFHVVLANLAKVYGSVMTIWVGSWRPMIVISDIDKAWEVLVTKSSDYSARNLPDITKIISANWRNISCSDSGPFWQNLRKGLQGGALAPLNVISQYHLQEKDMQNLIKSMHLEASRNNGIIKPLDHLKQETVRLLSRLIFGQDFHDEKLVVGMHHALDDLVRISGYASLADAFKFAENLPSHKKSIREVYELKERVEKLVRPHIVSNPPTNTYLHFLQSQNFSEDVIISAILEVYDLGVDSTASTTVWALTFLVREQKIQEKLYQEIKNVTGGRSTVRVEEVSKLTYLQAVMKETMRMKPIAPMAIPHKTSRETSLMGKKVDKDTVIMVNLYAIHHNPNVFPEPYKF…
Macleaya_cordata|mrna.BVC80_41g8		MELEMIMSNPWILTATTVAVMIFITMIFTRKSSSMKWPIGPKTLPVIGNMHLLGGTALHVVLHNLAKVYGNVMTIWIGSWRPVIVVSDIERAWEVLVNKSSDYSARDMPEITKIISADWKTISTSDSGPFWTNLRKGLQNVALSPHNLAAQFQFQERDISKLIETLKEEAALNGGIVKPLDHLKKATVRLISRLIYGQEFDNDKYVEDMHHAIEELIRVSGYARLAEAFYYAKYLPSHKKAVRDVEEANRRVQNLVRPFLSFNPPTNSYLHFLRSQNYPEEVIIFAIFEAYLLGVDSTSSTTAWALAFLVREPKVQDKVYQELKNFTVNNGREMLKVEDINKLPYLQAVIKETMRMKPIAPLAIPHKACRETSLMGSKIDKGTRVMVNIYALHHNQKVW…
Macleaya_cordata|mrna.BVC80_8983g48		MEVMLSILVGAVMILVHNLWKRWSVALEDMKLPPGPRKLPIIGNLHQLNKGGELIHVALAKLAQEHGKMMTIWFGGGQPSIVVSHHEVAWEVLVSKAADYSSRTLPYMSKFTSADWQTLATSNLGPFWQTLRKGLQTTTLNPHTISAQVQLQEKDITSMILSFKEEACLNDGIVEPLIPLRRTTVQLIGRFCFGPEFKNNEFVKEMDSVIEDTIRLTGVGRLIDIFEFIRYIPCLNLPFKEAYKVKQRIEGLIRPYIDHHKSTKSPCHSCYLHFLLSQDDFGEGVIIFNLFELFLLSVDSTSNATAWALAFLIHDEKIQQKVYEEVREIGHREIVTIEEVSKLKYVNAVVKETIRMKPIAPLAVPHQAVRDSKLMGTKVKKGTPVLVNLYAMHYDPSVW…
Menispermum_dauricum|Mdau05G000935.t1		MEEGRMWIVATTVVIVGALMILFEQSLPWRRRSRQQWPPGPAKFPVIGNLYQLNKGGDLVHVALTKMAKQYGRIMTIWFGSQEPTIVVSDHELAWEILVTKSSDYSSRTLPYLSRVTSADFHTLATCDLGPYWQTLRKGLQAFTINPHNISSQIHLQEKDIADLILSLEEEASLNNGVVDPLPKLRRLLILLIRRFCFGPDREFNDDLFVERMDCALEDVIRLFGHARLIDVFEFTRYIPGLGLGPFQEVKRLKRRIKELIRPYILAHKSSNSACQNCHLNFLLLQGFTEDVVVLNLFELFMLGVDSTSAAISWALAFMIHEGETQQKLVDEVINKLGRGRRMVGVEEVSELEYVQAVVKETMRMKPIAPLPVPHRAVRDSELKGTKVTEGTQVLVNLY…
Menispermum_dauricum|Mdau05G000938.t1		MGEGSLWIVATTLVMVGVLIFMMEQSLLWGRRSTQKWPPGPTKFPFIGNLYQLNKGGELVHVTLTKMAQQYGRIMTIWFGSQEPTIVVSDHELAWEVLVTKSSDYSSRTLPYLSRVTSADFHTLATCELGPYWQTLRKGLQAFTINPHNISSQIHLQEKDIADLVLSLEEEASLNNGVVDPLPKLRRLLILLIRRFCFGPDREFNDDLFVERMDCALEDVIRLFGHARLIDVFEFARYIPGIGLGPFQEVKRLKQRIKELIRPYILAHKSSNSACQNCHLNFLLSQGFTEDVVILNLFELFMLGVDSTSAAIAWALAFVIHEEETQQKLVDEVINKLGRGRRMVGVEEVSELEYVHAVVKETMRMKPIAPLPVPHRAVRDSELKGTKVREGTQVLVNLY…
Menispermum_dauricum|Mdau02G001304.t1		MGESSLWMVATTVAVMVVVLMIVFEQSFLWRRRYRQQWPPGPRKFPIIGNLYQLNKGGELVHVTLAKMAQEYGRIMTVWFGIQEPTIVVSDRELAWEILVTKSSDFSGRTLPNVMGKFLTANRQTLATSDLGPYWQTIRRGLHTFAINPHNISSQAHLQEKDIADLILSLKEEASLNDGVVKPMPKLRRLVIRLIRRFCFGPDREFNDEHDHLFVERMDCAAEDAIRISGLARLVDVFEFTRYIPVLGRPLQEVRRLKQRGFTEDVVIFNLFEIFLLAIDSTSAAIAWALAFMIHDGETQQKLVDEVIRKLGRGRKNAQLPLPHRAVRDSELKGTKVREGTLVLVNLYAVLDDGRVWKEPNRFKPKRFLQSHRGGNNGEEDLKAIMEMERSFLPFGAGR…
Papaver_somniferum|PS1126470.1	PsCYP719A21	MIMSNLWILTLISTILAVFAAVLIIFRRRISASTTEWPVGPKTLPIIGNLHILGGTALHVVLHKLAEVYGSVMTIWIGSWKPVIIVSDFDRAWEVLVNKSSDYSAREMPEITKIGTANWRTISSSDSGPFWATLRKGLQSVALSPQHLASQTAHQERDIIKLIKNLKDEAASGMVKPLDHLKKATVRLISRLIYGQDFDDDKYVEDMHDVIEFLIRISGYAQLAEVFYYAKYLPGHKRAVTGAEEAKRRVIALVRPFLQSNPATNTYLHFLKSQLYPEEVIIFAIFEAYLLGVDSTSSTTAWALAFLIREPSVQEKLYQELKNFTANNNRTMLKVEDVNKLPYLQAVVKETMRMKPIAPLAIPHKACKDTSLMGKKVDKGTKVMVNIHALHHTEKVWKE…
Papaver_somniferum|PS1126580.1		MAPINIEGNDFWMIACTVIIVFALVKFMFSKISFYQSANTTEWPAGPKTLPIIGNLHQLGGGVPLQVALANLAKVYGGAFTIWIGSWVPMIVISDIDNAREVLVNKSADYSARDVPDILKIITANGKNIADCDSGPFWHNLKKGLQSCINPSNVMSLSRLQEKDMQNLIKSMQERASQHNGIIKPLDHAKEASMRLLSRVIFGHDFSNEDLVIGVKDALDEMVRISGLASLADAFKIAKYLPSQRKNIRDMYATRDRVYNLIQPHIVPNLPANSFLYFLTSQDYSDEIIYSMVLEIFGLGVDSTAATAVWALSFLVGEQEIQEKLYREINNRTGGQRPVKVVDLKELPYLQAVMKETLRMKPIAPLAVPHVAAKDTTFKGRRIVKGTKVMVNLYAIHHD…
Papaver_somniferum|PS0210570.1		MDENSLIIIAGTVIIVLAIAKILALRKSYPTGTEWPAGPKTLPLIGNLHQLWGDLFHVVLANLAKVHGGVFTIWLGSWNPVIIVSDVNSAREVLLTKSSDYSARNYPDYLTVLSEGNDSINGSDCGPFWHNLRKGLTSGALNPLNVTSQSHLQERDMQNLIKSMQENALRENGILRPLDYVKKEAIRLLNRTIFGQDFSNDEDFIVGIHHTVHHLISIGGFANLADAFKIGEYVPRHRRYIRGLNNVGEQAAKLILPHIAAKPPTNSYLHFLKSQDFSEDVIVSLILEVYGFATDSIASTIVWALTFLVREQKIQEKLYREIKDVTGGTRPVKIADVNKMLYLKAVMKETIRMKPLGPMAIAHKATKNTSLMGRKIDKGTPVMVNIYAIQHNSEVFPEP…
Papaver_somniferum|PS0212130.1		MEGIQWIILSILVGALMILCKSWFTKTMELPPGPRKLPVIGNLHQLNKGGELVHVTLAKMAQQHGKIMTVWFGGQQPSIVVSHHDAAWEVLVTKASDFSSRTLPYMSKFSSADWYTLATCNLGPFWQNLRKGLQTTTLNPHTFSAQVHLQEKDISNLILDLKEEASLNGGIVKPMIPLRRTTIQLIGRFCFGAEFEDKDGFVENIDTVMEETIRLSGHARLVDVFEFTRYIPGFRLLFKEAYELKRKIEETIRPYIRRYKSSTNCFLQFLLSQEDYSEEVVIFNLFEQFLLSTDSTSNTTSWALAYLIHNEKIQEKVYEEVQELTRSGRSREEMVTIEEVSKLKYVNAAVKEVLRMKPIAPLAVPHQAVCDSNLMGMKVRKGTPVMVNIYAVHYDPTVW…
Papaver_somniferum|PS0214290.1	PsCYP719A25	MEETFWLVTCGVVVAFALAKLLFGKKSSLSTMEWPAGPKTLPIIGNLHQLGGEAFHVCLANLAKVYGGVFTIWVGSWRPFIVISDVDKAWEVLVNKSSDYSARDMPDITKIISANWKNISHGDSGPFWHNLRKGLQGVALTPFNVASQYHLQERDMQNLIKSMTKKASQKNGILKPLDYVKEETVRLLSRLIFGQDFVDEDFVVGMHQALDELVSISGYASLADAFKFCENLPSHKKTVRAVHAIKIRFDNLIRPHIVSNPPTNTYLHFLLSQDFSEDVIISAILEVYDLGVDSTASTTVWALTFLVREQKIQEKLYREINNVTGGKKPVKVEDLNKLPYLQAVMKETMRMKPIAPMAIPHKASKDTSLMGKKINKGAVVMVNLYAIHHNPAVFPEPYK…
Papaver_somniferum|PS0214310.1	PsCYP719A20	MVWPTGPKTLPIIGNMHVLGGTALQVVLHNLAKIHGNVMTIWIGSWRPVIVVSDIDRAWEVLVNKSSDYSARDMPEITKIISADWKTISTSDSGPGWSNLRKGLQNVALSPHNLAAQSQFQEKDITKMIQSLKKEAASNNGIVKPIDHLKKATLRLISRLIFGQDFDDDKYVDDMHHAIEELIRVSGYAQLAEAFYYAKYLPSHKKAVRDVEEANQRVKKLVRPFLSLNPPTNTYLHFLNSQKYDEEVIIFAIFEAYLLGVDSTSLTTAWALAFLIREPVVQDKLYQELKNLTAKNDCEIVKVEDLNKLQYLQAVLKETMRMKPIAPLAIPHKACRDTSLKGNKIDQGTRVMVNIYALHHNEKVWKEPFKFMPERFLQTQDVVNGKAMEQSLLPFSAGM…
Papaver_somniferum|PS0232250.1		MEETFWLITCGVVVAFALAKLQFGKKSSLSTMEWPAGPKKLPIIGNLHQLGGEAFHVCMENMAKVHGSVFTIWLGGWRPFIVISDADKAWEVLVNKSSDYSARDMPDITKIISANWKNISHCDSGPFWHNLRKGLQSVALTPFNVASQYHFQERDMQNLIKSIYQKTLHKNGTLKPLDYVKEETVRLLSRLIFGQDLVDEDFVVGMHQALDEYIETISRASLADVFKFCENLPSHKKTIRAVHAIKKRIDSLIRPYIVSKPPTNTYLHFLLSQDFSEDVIISAIHEVYDLGVDATSLTTVWALTFLVREQKIQEKLCREIQNVTGGERPVKVEDINKLPYLQAVMKETMRMKPVAPMAIPHKALKDTSLMGKKINKGTVVMVNLYAIHHNPDVFPEPYK…
Papaver_somniferum|PS0233440.1		MEVTFWLITCGVVVAFALAKLLFGKKSSMSTMEWPSGPKTLPIIGNLHQLGGEAFHVCLANLAKVYGGVFTIWVGSWRPFIVISDVDKAWEVLVNKSSDYSARDMPDITKIISANWKNISHGDSGPFWHNLRKGLQGVALTPFNVASQYHLQERDMQNLIKSMKKKASQKNGILKPLDYVKEETVRLLSRLIFSQEFVDEDFVVGMHQALDELVSISGYASLADAFKFCENLPSHKKTIRAVHAIKIRFDNLIRPHIVSNPPTNTYLHFLLSQDFSEDVIISAILEVYDLGVDSTASTTVWALTFLVREQKIQEKLYREINNVTGGKRPVKVEDLNKLPYLQAVMKETMRMKPIAPMAIPHKASKDTSLMGKKINKGTVVMVNLYAIHHNPAVFPEPYK…
Papaver_somniferum|PS0244280.1		MEGIQWTLLSIFVGVLIIWKRWFTKTMELPPGPRKLPVIGNLHQLNKGGELVHVTLAKMAQEHGKIMTVWFGGKQPSIVVSHHEAAWEVLVTKASDFSSRTLPYMSKFSSADWHTLATCNLGPFWQNLRKCLQTTTLNPHTFSAQVHLQEKDISNLILTFKEEASLNGGMVPLQRTTIQLIGRFCFGVEFEDKDGFVENIDAVMEETIRLSGHARLVDVFEFTRYIPGFRLLFKEAYELKHKIEETIRPYIRRYKSSTNCFLQFLLSQEDYSEEVVIFNLFEQFLLSTDSTSNATSWALAYLIHDEKIQQKVYAEVQELTGNGHSREEMITVEEVSKL
Papaver_somniferum|PS0244370.1		MVPLRRTTIQLIGRFCFGVEFEDKDGFVENIDAVMEETIRLSGHARLVDVFEFTRYIPGFRLLFKEAYELKHKIEETIRPYIRRYKSSTNCFLQFLLCQEDYSEEVVIFNLFEQFLLSTDSTSNATSWALAYLIHDEKIQQKVYAEVQELTGNGHSREEMITVEEVSKLKYVNAVVKEVLRMKPIAPLAVPHQAVCDSSLMGMKVRKGTPVMVNIYAVHYDPTVWVEPQRFMPERFLGALNDGGDKNKATLAMERSLIAFGAGRRICAGMDLAKLQVALTLANLVNSFRWSCVSEGKFPDLTEDLFFILRMKTPLVARIVPR
Papaver_somniferum|PSUN29460.1		MDENSLIIIASTVIMVLAIAKFLALRKSYPTGTEWPAGPKTLPLIGNLHQLWGDLFHVVLANLAKVHGGVFTIWLGSWNPVIIVSDVNSAREVLLTKSSDYSSRNYPEYLTVLSEGNDSINGSDCGPFWHNLRKGLTSGALNPLNVTSQSHLQESDMQNLIRSLQENASREKGILKPLDYVKKEAIRLLNRLIFGQDFSNDEDFIVGIHHTVHHLISIGGFANLADAFKIGEYVPRHRRYIRGLNDVGEQAAKLILPHIAAKPPTNSYLHFLKSQDFSEDVIVSLILEVYGFATDSIASTIVWALTYLVREPKIQEKLYREIKDVTGGTRPVKIADLNKMSYLKAVMKETIRMKPLGPMAIAHKATKNTSLMGRKIAKDTPVMVNIYAIQHNSEVFPEP…
Papaver_somniferum|PSUN63120.1		MAPINIQGNDFWMIACTVIIVFALVKFMFSKISFYQSANTTEWPAGPKTLPIIGNLHQLGGGVPLQVALANLAKVYGGAFTVWIGSWVPMIIISDIDNAREVLVNKSADYSARDVPDILKIITANGKNIADCDSGPFWHNLKKGLQSCINPSNVMSLSRLQEKDMQNLIKSMQERASQQNGIVKPLDHAKEASMRLLSRVIFGQDFSNEDLVIGVKDALDEMVRISGLASLADAFKIAKYLPSQRKNIRDMYATRDRVYNLIQPHIVSNLPANSFLHFLTSQDYSDEIIYSMVLEIFGLGVDSTAATAVWALSFLVCEQEIQEKLYREINNLTGGQRPVKVVDLKELPYLQAVMKETLRMKPIAPLAVPHVAAKDTTLKGRRIVKGTKVMVNLYAIHHD…
Stephania_cepharantha|ScepChr8G00200450.1		MEQSMLWIAVTVIVFLLGWSMKLLDRTSSKQQRLPPGPPKIPLIGNLHQLNKGGELLHVVLAKMAQEYGTIMTVWFGGLQPSIVVSDYELVWKVLVTKASDFSARKLPDLTRIISANFQTLATCDVGQHWHSLRRGLHSSALNPQTISDQAQLQESDIADLISSLEHEASSNNGLVHPLPKLRKLVIRLLARFCFGPDQFPNDEVFVQGMDCAVEDFIKQTGHTSLVHLFAITKYIPGLWRPYKEAESLKQRGLSDDVVILNLFELFSLAIDSTASAIAWALAFMIHKREVQEKVFEQVITKHKLGERRRGNAVISVEEVRDMEYVHAVVKETVRMRPILPVAPQRAERDSELGGVKVREGTPVVMNLYAVLRDERVWREPNRFMPERFLGSDDGGDNY…
Stephania_cepharantha|ScepChr10G00247390.1		MEVSSVYLAVATLASLLLLSKLLFGSSSSKQQWPPGPKKLPFIGNLHQLGGGGDPLHWTLSDLARKYGKLMTVWFGSQKPNIVITDLDLAWELLVTKGADYWSRKMPYLAKITTAGFRTLSACDGGPYWESLRKGLHATALNPQTISSQTKLQEQDIADMISKMQQEADLNNGVVKPLHHLRELAIRLIYRLSFGTGVPIEDRFVKRMDELIEEQMGIWAAAHLVDVFEFTKHIPGLKPPLKETKAHIERIKALLRPCLAASKKYSLSGNNTHLSFLLSQGFSEEVILLNLFEVFNFGVDSTSASIVWALGFLILERETQEKLYKEVEGKLEGSRRMVRVEDIGGWSTCMRW*
Stephania_cepharantha|ScepChr10G00248900.1		MEILMDQSGSSVWMITVAAAVVLIGLSAWKLKKQHQQQQLPPGPKTVPLIGNILELGKGGELLHVSLTKLANKYGEMMTVWFGGFEPTIVATSHELVWEIMVSKANDFSDRSLPWLTKILTCNWQTLATCDLGPYWHMIRKGLQSTTLNHQTIMAQTQVQESDIAHLLTSLDQEALSNNGIVKPYPKLRKLVVRLVSRFCFGPDFPNDDDFVDRLDSTLDESIHQSGHIRLADLFEFTRYVPGLWGPFKESQNLKARILRLLSPHLKAATPNCYSSFLLSKGLSEEVVVFNLYELYELAVDATSNTTAWALAFIIHNKDVQEKVLKEVMCKNELGERRRIVRVEELSEMEYVQAVAKETIRMRPIAPVMPHKAARDGELKGVKVKGGTPVLMNFHAVLH…
Stephania_japonica|SjapChr4G00116340.1		MEVSSVYLAVATLASLLLLSKVLFGSSTKQQWPPGPKKLPLIGNLHQLGGGGEPLHWTLADFARKHGKLMTVWFGSQKPNIVVTDLELAWELLVTKGADYWSRKMPFLAKITTAGYRTMSACDGGPYWESLRKGLHATALNPQTISSQTKLQEQDIADMISKMQQEADLNSGVVKPLHHLRELAIRLIYRLSFGTGVPIEERFVRRMDELIEEQMGIWAAAHLVDVFEFTKHIPGLKPPLKETKAHTERIKELLRPCLAASKKYSLSGNNTHLSFLLSQGFSEEVILLNLFEVFNFGVDSTSASIVWALGFLILERETQEKLYKEMEAKLGGSRRMVRVEDVSGMEYIHAVVKETMRMRPVAPMAMPHRAARDTELKGLKVKEGTSMMVNLYALLHDEK…
Stephania_japonica|SjapChr4G00117800.1		MTVWFGGFEPSIVVTSHELVWEIMVTKANDFSDRSLPWLTKILTCNWQTLATCDLGPYWHSIRKGLQSTTLNHQTIMAQTQLQESDIAHLITSFEQEALSNNGIVKPYPKLRKLVVRLVSRFCFGPDFPNDDDFVERLDSTLDESIHQSGHIRLADLFEFTKYVPGLWGPFKESHGLKARIFHLLSPHLKAAATPNCYSSFLLSKGLSEEVVVFNLYELFELAVDATSNTTAWALAFIIHNKGVQEKMLKEVMYNKLGERRKIVRVEELSEMEYVQAVAKETIRMRPIAPVMPHKAARDGELKGAKVRGGTPVLMNLYAVLHNDKVWREPNRFMPERFLKGAGDVEAMERSFVSFGVGRRSCPGMELAKIQIGLTVANLVNRFEWCSAVDGELPDLSED…
Stephania_japonica|SjapChr9G00224560.1		MEQSILWVAVTAVFLLGWLMKLMDRNSAKQQQQLPPGPPKIPLIGNLYQLNKGGELLHVVLAKMAQEYGTIMTVWFGGLQPSIVVSDYDLVWKVLVTKASDFSARKLPDLTRIISANFQTLATCDVGQHWHSLRRGLHSSALNPQTISDQAPLQEKDIAHLISSFDQEASSNNGLVHPLPKLRKLVIRLLARFCFGPEFPNDEVFVEKMDCAVEDFIKQTGHTSLVHLFAITKYIPGLWRPYKEAESLKQRVKELLSPYLNTNKPSSPNCYLSFLLSQGLSDDVVILNLFELFSLAIDSTASAIAWSLAFMIHNEEVQEKVFEEVKHKLGGRVRENVVSVEKVSEMEYVRAVVKETVRMRPILPVAPQRAERDSELGGVKVREGTAVVMNLYAVLRDER…
Stephania_japonica|SjapChr9G00224580.1		MEQSTLYLAVATLSFLLILSKLVGSITRQQKWPPGPKKLPIIGNLHQLGGDVLHWTLAELAEKHGKLMTVWFGFQQPFIVVTDPDLAWEMLVTKGVDYLSRKMPYLSRITSADYRTLGTSDGGPYWETLRKGLQSTALNPRTISSQTTLQEQDIADMIGSMRREADLNNGVVKPFHHLRKLAIRLIGRLCFGTAFPNEDRFVDRMDELIEEDMRLSTIPRLVDVFEFTRHIPGLKPPLKEIREHTEKIKELIRPCLAAAHKYTSSGNSHMSFLISQGLSEDVILLNLFEVFVFGVDSTSASIVWALGFLILEREAQEKLFNEVEAKLGGSRRMVRVEDVSEMVYVHAVVKETLRMRPVAPTAVPHKAATDSELKGLKVKQGTALLVNLYALLNDEKAWK…
Stephania_japonica|SjapChr11G00260550.1		MEDALMIVGTVLLLVLLMLLLDQTFLWSAAKQQWPAGPKRLPLVGNLHKLNRGGKPLHVTLSEMAGEHGGMMTVWFGGQQPTIVLSDRDLVWEVMVNKATDFGARSLPKITKIFTADWGTLATCELGDHWQTLRKGLQSCAINPLTISSQSQLQEKDIADLITSLEHEASLNDGVVEPLPKLRKLVIRLMARFCFGREFPNEDHFVEELDLLMLDEGRLMGHTRFADVFSFTRYVPGLWGPFIEAENLKRRIKELIRPYLIGSTNKTTHPINCFMSFLVSQGLPEEVVIFNLFDLFSLAGDSTSNTLAWALGFIIHNEEVQERMYKEIMNHGKLSKMRNMVSTEEVSTAGMEYVHAVVKETMRMRPAVVLAPVRASADSELEGLKIRGGTAVMLNLYAV…
Stephania_yunnanensis|SyunChr6G00150360.1		MVKISKSSINTIMFGISLSFPERILSSVWARKNETKMMVCDLFQERDRQLIYSIPICQNGLEDEWMWGGDHQGIYMVLKCFVELVVEINGKKNKKKGHVILAKGETKSDRSNPERSMEQSMLWIAVTVIVFLLGWSMKLLDRTSSKQQQQQQLPPGPPKIPLIGNLHQLNKGGELLHVVLAKMAQEYGTIMTVWFGGLQPSIVVSDYDLVWKVLVTKASDFSARKLPDLTRIISANFQTLATCDVGQHWHSLRRGLHSSALNPQTISDQAQLQESDIADLISSLEHEASLNNGLVHPLPKLRKLVIRLLARFCFGPDQFPNDEVFVQGMDCAVEDFIKQTGHTSLVHLFAITKYIPGLWRPYKEAESLKQRGLSDDVVILNLFELFSLAIDSTANAITW…
Stephania_yunnanensis|SyunChr11G00265080.1		MEILMEQSSTSSSVWMITVAAAVVVLFGLSAKLLAWKLKKQQQQKLLPPGPKTVPLIGNMLELGKGGELLHVSLTKLAKKYGEMMTVWFGGFEPTIVATSHELVWEIMVSKANDFSDRSLPWLTKILTCNWQTLATCDLGPYWHMIRKGLQSTTLNHQTIMAQTKVQESDIDHLITSLHQEALSNNGIVRPYPKLRKLVVRLVSRFCFGPDFPNDDDFVERLDSTLDESIHQSGHIRLADLFEFTRYVPGLWGPFKESLNLKGRILQLLSPHLKAAAAATPNCYSSFLLSKGLSEEVVVFNLYELFELAVDATSNTTAWALAFIIHNKDVQEKVLKEVMYNKLGERRRIVRVEELSEMEYVQAVAKETIRMRPIAPVMPHKAARDGELKGVKVKGGTPV…
Thalictrum_thalictroides|TTHA_TU.05205.mRNA		MTLGDVDFVKIEDVSKLKYLQAVVKETMRMKPIAPLAIPHKTAKDTTLMGTKVTKGTRIMVNLYALHHNQNIWTKPYKFMPERFLQGEDGSASNKAMEQSFLPFSAGMRICAGMDLGKLQFAFALANLVNAFKWSCVEEATLAFVVVALTILIPMLVTSTSSQMKWPTGPKKLPIIGNLHQLRGDVLHVALAKLAKVHGSVMTVWIGHWRPIIVISDIDKAWEVLVNKSSDYGARDMPEITKIASASWHTISTSDAGAFWQTVRKGLQSGAMGPLNIAAQSEFQETDMKRLIQALTDEAAKNNNIVKPLDHIKKNTVRLLTRLIFGQTFDDDKFVESMHYEIDDIIRISGYARLAEAFYYAKYLPSHKKAEREAYLVKCRVEELVKPLLSSNPPTNSYL…
Thalictrum_thalictroides|TTHA_TU.10697.mRNA		MFSTSSSQMKWPSGPKKLLIIGNLHQLGGDVLHVALAKLAKVHGGVMTVWIGSWRPIIVISDIDKAWEVLVNKSSDYGARDLTEITKTVTASWQTISTSDAGAFWQTLRKGLQSGALGPLNIAAQSQFQEGDMKRLIQAMVEEAAKNNNIVKPLNHIKQNTVRLLTRLIFGQTFDDDKFVESMHYDVDDVIRIGGYARLAEAFYYAKYLPSHRKAVREANLVKLRVEKLIRPLLSSTPPTNSYLYFLLSQNLPEEIIIFCIFELYILGVDSTSSTTTWALAYLIHEQAVQEKLYQETRMTLGDVDLVKIEDVNKLKYLQAVVKETMRMKPIAPLAIPHKTAKDTTLMGTKVTKGTQIMVNLYALHHNPDIWTEPCKFIPERFMQRDDGSATSKAMEQSF…
Thalictrum_thalictroides|TTHA_TU.14856.mRNA		MEVSLWLVSATLAILLAITTLIRMFTSSSQMKWPSGPKKLPIIGNLHQLGGEVLHVALAKLAKVHGSVMTIWIGSWRPIIVISDTDKAWEVLVTKSSDFGARDFPEFTDTVTASCHTISSSDPGAFWQTLRKGLQSGALGPLNIVAQRQFQERDMKRMIQAMMDEAAKNNNIVKPMEHIKLNSVRLLTRLIFGQTFDDDKFVESMLFEVDDVIRIGGFARLAEAFYYAKYLPSHRKAVREANLLKLRVEKLVRPLLSSSPPTNSYLYFLLSQNLAEEIIIFCIFELYCLGVDSTSSTTTWAIAYLIHEQAVQEKLYQEVRITLDDVDLVRIEDVSKFKYLQAVVKETMRMKPIAPFAIPHKTAKDTTLMGTKVAKGTSIMVNLYALHHNPDIWTEPYKF…
Thalictrum_thalictroides|TTHA_TU.17777.mRNA		MEVSLWLVSAAFAILLALTTLIRMFTPSSSFSQMKWPSGPKKLPIIGNLHQLGGDVLHVALAKLAKVHGGVMTVWIGSWRPIIVISDIDQAWEVLVNKSSDYGARDSPEILKNATARWHTISTSDVGAAFWQTLRKGLQSGALGPLNIAAQSQFQEGDMKRLLQAMTDEAAKNNNIVKPMEHIKQNSVRLLTRLIFGQTFDDDKFVESMHYDVDDVIRIAGYARRAEAFYYAKYLPSHRKAERDMYLVMCRVEELVRPLLSSNPPTNSYLYFLLSQNFPEEVIISCIFELYVLGVDSTSLTTTWALAYLVREQAVQEKLFQDTRMTLGDVDLVKIEDVRKLKYLQAVVKETTRMKPIAPLAIPHKATKDTTLMGSKVAKGTQIMVNLYALHHNENIWVE…
Thalictrum_thalictroides|TTHA_TU.23474.mRNA		MLLSIIELQPKNSTGVDMEVSLWLVYATFPILLAITILIRMFMSSPQKKWPNGPKKLPIIGNLHQLGDENLHHVSLTKLAEVHGGVMTIWIGSWRPIIVISDIDKAWEVLVTKSSDYGARDFPEITKILTASCHTILSSDPGAFWQTLRKGLQSGALGPLNIAAQSQFHERDMKQLIQIMKDEATRNNNIVKPMEHIKQNIVRLLSRIIFGQTFDDDKFVESMLFEIYDVIRIDGFARLAEAFYYAKYLPSHMKAVREANLLKLRVEKLVRPFLSSSPPTNTYLYFLLSQNFPEEIIISCIFELYSLTVDSTSTTITWALAYLIHEQAIQEKLYQEIRKTLNDVDLVRIEDVSKLKYLQAVVKETMRMKPIAPFAIPHKTAKDTTLMGTKVAKGTSIMV…
Thalictrum_thalictroides|TTHA_TU.27019.mRNA		MEVVSLLLVSATLAFVVAITILIPIIMSSSSFLQTKWPTGPKKLPIIGNLHQLGGDVLHVALAKLAKVHGSVMTIWIGTWRPIIVISDIDKAWEVLVNKSSDYGARDMPEITKIASASWHTISTSDAGAFWQTVRKGLQSGAMGPLNIAAQSQFQERDIKRLIQALADEAAKNNNIVKPLDHIKKNTIRLLTRLIFGKTFDDDKFVESMHYEIDDIIRISGYARLAEAFYYAKYLPSHKKAEREAYQVKCRVEELVRPLLSSNPPANSYLYFLLSQNFAEEVIIFCIFELYLLGVDSTSSTTTWALAYLIREQEVQQKLYQDTRMTLGDVDLVKIEDVSKLKYLQAVVKETMRMKPIAPLAIPHKTAKDTTLMGTKVKKDTRIMVNLYALHHNQNIWTK…
Thalictrum_thalictroides|TTHA_TU.32409.mRNA		MPSSQMKWPSGPKKLPIIGNLHRLGGDVLHVALAKLAKVHGGVMTVWIGSWRPIIVISDIDKAWEVLVNKSLDYGARDLPEITKSITASWHTISTTDVGAFWQTIRKGLQSGALGPLNIAAQSQFQEGDLKRLIQSMMDEAAKNNNIVKPMEHIKLNSVRLLTRLIFGQTFDDDKFVESMHNDVDDVIRIGGYARLAEAFYYAKYLPSHRKAEREMYLVKCRVEKLVRPFLSSNPPTNSYLYFLLSQNFPEVVIIFCIFELYVLGVDSTSSTTTWALAYMIQYEQTVQEKLYQEIRMTLGDVDLVKVEDVSKLKYLQAVVKETMRMKPIAPLAIPHMAIKDTTLTGTKVVEGTQIMVNLYALHHNENTWTEPYKFIPERFMQGEDESATNKVMERSFLP…
Tetracentron_sinense|Tesin05G0072200.1		MEGSSWILVAIVVGGVIMLMVENFCKRSVTSNASEWPPGPPKFPIIGNLHQIKKTGELIHLTLAKLAKVHGGMMTVWFGSWKPTIVVSDPDLAWEVLVTKASDFSSRTFPYRSKLTSADWHTLSTSNFGPHWHTLRKGLHNTTFNPQTIAAQARLQEHDLINMTGCLQEEASSNHGFVKPLLHLRRATVRVIARFCFGLDFEDERFVQDMDNVVEELIRITSHSHLVDVFEFARHIPILRRPFLESCRVKHMIEDLIGPYISSHRSSSPNNCYLHFLLSQDFQEEVVISSLFDLFLLGVDSTSTTIAWALAFLIHNPQIQHKLYEEVGRSGSGTISIEEVTKLQYLNAVVMETMRMKPIAPLGVPHKAARDSNIMRTKVLEGSTVVVNLYALLHDPIVW…
Tetracentron_sinense|Tesin05G0072300.1		MEGSSWILVAIVVGGVIMLMVENFCKRSVKSNASEWPPGPPKFPIIGNLHQIKKTGELIHLTLAQLAKVHGGMMTVWFGSWKPTIVVSDPDLAWEASIYNTTFNPQTIAAQAQLQEHDLINMTGSLKEEASSNHGVVKPLLHLRRATVRVIARFCFGLDFEDESFVQDMDSVVEELIRITSHAYLVDVFEFARYIPILRRPFLESCRVKHMIEELIGPYISSHRSSSPNNCYLHFLLSQDFQEEVVISSLFDLFLLGVDSTSTTIAWALAFLIHNPQIQHKLYEEVGRSGSGTISIEEVTKLQYLNAVVMETMRMKPIAPLGVPHKAARDSNIMRTKVVGGSTVVVNLYALLHDPTVWAEPHRFMPERFLTSLKNGNDGSLVEAIERSFLPFGAGRRVC…
Tetracentron_sinense|Tesin05G0072400.1		MEASSWILVAIVVGVGGVMLMVENFSKRSMKSEASKWPPGPPKFPIIGNLHQIKKRGELIHSTLARLAKVHGGIMTVWFGSWKPTIVVSDPELAWEVLVTKASDFSSRTLPYWSKITTADWHTISTSNFGPHWHTLRKGLHNTTFNPQTIAAQARLQEHDLVNMTASLREEASSNHGVVKPLLHLRRATVRVIARFCFGFDFDDEIFVEGIDSVVEETIRLTSHSRLADIFEISRHIPILRRSFLEAYRVKQKIEELIGPYISSRRSSSPNNCYLHFLLSQDFQEEVIISNLFDLFLLGVDSTSTTITWALAFLIHNQEIQHKLYEEFVRCGSGTISIEEVSKLRYLNAVVMETMRMKPIAPLGVPHKAARDSNIMGTKVVEGSTVVVNLYALLHDPIV…
Tetracentron_sinense|Tesin05G0072600.1		MEGSSWILVAIVVGGVIMLMVENFRKRGSKWPPGPPKLPILGNLHQINKGGELIHLALAKLAKVHGGMMTVWFGSWKPMIVVSDPALAWEVLVTKSSDFSSRTLPYMSKIISADWHTIATSNFGPHWHALRKGLHNTTFNPQTIAAQARLQEHDLVNLTGSLQEEAASNHGVVKPLLHLRRASVRVIARFCFGFDFEDESFVEAMDSVVEEAIRLTSHSRLVNVFEFSRHIPILRRSYLEAYRVKHRIEELIGAQISSHRSAPTNCYLHFLLSHDFQEEVVIYNLFDLFFLGVDSTSTTIAWALAFLIHNPQIQHKLYEEVCRSGSKTITVEEVSKLRYLNAVVMETMRMKPIAPLGVPHKAARDSNIMGTKVLKGSPVMVNLYALLHDPSVWVEPHRF…
Tetracentron_sinense|Tesin17G0057500.1		MEGSSWILVAIVVGGVIMLMVENFCKRGSKWPPGPPKLPILGNLHQISRGGELIHLTLAKLAKVHGGMMTVWFGSWKPTIVVSDPVHAWEVLVTKASDFSSRALPYISKIITADWHTISTSNFGPHWHALRKGLHNTTFNPQTIAAQARLQEHDLVNLMGSLQEEAASNHGVVKPLLHLRRASVRVIARFCFGFDFEDESFVEAMDNVVEEAIRLTAHFRLGGVFEFSRHIPILRRSYLEAYRVKHRIEELIGPQISSHKSSPPNYCYLHFLLSQDFQEDVVIYNLFDLFFLGVDSTSTTIEWALAFLIHNQEIQQKLYEEVTRSGISIEEVSKLQYLNAVVMETMRMKPIAPLGIPHKAARDSNIMGTKVLKGSPVVVNLYALLHDPSVWVEPHRFMP…
Tetracentron_sinense|Tesin24G0017300.1		MEGSSWILVAIVVGGVIMLMVETFCKRSVKSNASQWPPGPPKFPIIGNLHQIKKTGELIHLTLAKLAKVHGGMMTVWFGSWKPTIVVSDPDLAWEVLVTKASDFSSRTFPYRSKLTSADWHTLSTSNFGPHWHTLRKGLHNTTFNPQTIAAQARLQEHDLISMTGSLQEEASSNHGVVKPLLHLRRATVRVIARFCFGLDFEDESFVQDMDNVVEELIRITSHSHLVDVFEFARHIPILRRPFLESCRVKHMIEDLIGPYISSHRSSSPNNCYLHFLLSQDFQEDVVISSLFDLFLLGVDSTSTTIAWALAFLIHNPQIQHKLYEEVGRSRSGTISIEEVSKLQYLNAVVMETMRMKPIAPLGVPHKAARDSNIMRTKVVEGSTVVVNLYALLHDPTVW…
Tetracentron_sinense|TesinUnG0107300.1		MDSSCHSGGWSRHPGRSHTCTSKIITADWHTISTSNVGPHWHALRKGLHNTTFNPQTIAAQARLQEHDLVNLTGSLQEEAASNHGVVKPLLHLRRASVRVIARFCFGFDFEDESFVEAMDSVVEEAIRLTSHFRLVNVFEFSRHIPILRRSYLEAYRVKHRIEELIGLQISSHKSSPPNYCYLHFLLSQDFQEEVVIYNLFDLFFFGVDSTSITIEWALALLIHNQEIQQKLYEEVARSGISIEEVSKLQYLNAVVMETMRMKPIAPLGVPHKAARDSNIMGTKVLKGSPVMVNLYALLHDPSVWVEPHRFMPERFLTSSKNGNDDSSLVGAIERSFLPFGAGRRVCAGMELAKLEVGLTLAHLVNDFRWSSTVEGQLPDLTENLTVLISMKTPLVARI…
Epimedium_pubescens|Ebr01G056600.1		MEATVWAITTTVILVLSIAMISLRTKSSSSTKWPPGPKTLPILGNLHQLRGDLLHVALAKLAKVHQGVMTIWIGSWRPVIVVSDMDKAWEVLVTKSSDYSARDMAETSKIVSANCRTVSSTDSGPFWQNLRKGLQHGPFGPLNISEQIHFQQRDIHRMIQDMKEEAVRNGGTVKPLNHLKRASIRLLSRLIFGHTFHNDSFVESMLRVLQDSTEFGSKAHLDAAFSYVKYLPSFKRTVKEFYGLKSRIEELVRPFLSSTPKGSYLNFLLSQDYPEEVIIFCIFELYLVGVDSTSSTTTWALAFLIHDQVVQEKLYQELKGKTDDYPLVKSEDLGKMEFLHAVMKETMRMKPVAPLAIPHKTAKDTTLTGTKVAKGTCVMVNIYALHHDPNIWTEPYRFM…
Epimedium_pubescens|Ebr02G024720.1		MEITLWAITTTVITVLSFAMISLRFKSSSSTKWPPGPKPLPIIGNLHQLGGDVLHVVLAKLAKGYGGVMTIWIGSWSPVIVVSDMDKAWEVLVNKSSDYSARHMAKLSKFLSANSQTIFTSDPGPLWQNLRKGLQHGPLGPLNISAQIHFQQRDIDRMVRDIHEEAVLNGGMAKPLQHLKKASTRLLSRLIFGHTFDDDSFIDSMQGVVQDGNELAGKAHLDEAFSYVKYLPSYKRTVKQFCVIKSRVEHLVRPFLTSSPPSNTYLNFLLAQDYPEEIIIFCIFELYLLGIESSSSTTTWALAFLIHDHAVQEKLYQEIKGKADGEHLLKAEDLDKMPYLQAVMKETMRMKPIAPLAVPHKSAKDTTLMGAKVAKGTCVMVNLYALHHDPNVWTEPYRF…
Epimedium_pubescens|Ebr02G024730.1		MEITLWAITTTVITVLSFAMISLRFKSSSSTKWPPGPKPLPIIGNLHQLGGDVLHVVLAKLAKGYGGVMTIWIGSWSPVIVVSDMDKAWEVLVNKSSDYSARHMAKLSKFLSANSQTIFTSDPGPLWQNLRKGLQHGPLGPLNISAQIHFQQRDIDRMVRDIHEEAVLNGGMAKPLQHLKKASTRLLSRLIFGHTFDDDSFIDSMQGVVQDGNELAGKAHLDEAFSYVKYLPSYKRTVKQFCVIKSRVEHLVRPFLTSSPPSNTYLNFLLAQDYPEEIIIFCIFELYLLGIESSSSTTTWALAFLIHDHAVQEKLYQEIKGKADGEHLLKAEDLDKMPYLQAVMKETMRMKPIAPLAVPHKSAKDTTLMGAKVAKGTCVMVNLYALHHDPNVWTEPYRF…
Epimedium_pubescens|Ebr02G024740.1		MEITLWAITTTVITVLSFAMISLRFKSSSSTKWPPGPKPLPIIGNLHQLGGDVLHVVLAKLAKGYGGVMTIWIGSWSPVIVVSDMDKAWEVLVNKSSDYSARHMAKLSKFLSANSQTIFTSDPGPLWQNLRKGLQHGPLGPLNISAQIHFQQRDIDRMVRDIHEEAVLNGGMAKPLQHLKKASTRLLSRLIFGHTFDDDSFIDSMQGVVQDGNELAGKAHLDEAFSYVKYLPSYKRTVKQFCVIKSRVEHLVRPFLTSSPPSNTYLNFLLAQDYPEEIIIFCIFELYLLGIESSSSTTTWALAFLIHDHAVQEKLYQEIKGKADGEHLLKAEDLDKMPYLQAVMKETMRMKPIAPLAVPHKSAKDTTLMGAKVAKGTCVMVNLYALHHDPNVWTEPYRF…
Epimedium_pubescens|Ebr02G024750.1		MEITLWAITTTVITVLSFAMISLRFKSSSSTKWPPGPKPLPIIGNLHQLGGDVLHVVLAKLAKGYGGVMTIWIGSWSPVIVVSDMDKAWEVLVNKSSDYSARHMAKLSKFLSANSQTIFTSDPGPLWQNLRKGLQHGPLGPLNISAQIHFQQRDIDRMVRDIHEEAVLNGGMAKPLQHLKKASTRLLSRLIFGHTFDDDSFIDSMQGVVQDGNELAGKAHLDEAFSYVKYLPSYKRTVKQFCVIKSRVEHLVRLFLTSSPPSNTYLNFLLAQDYPEEIIIFCIFELYLLGIESSSSTTTWALAFLIHDHAVQEKLYQEIKGKADGEHLLKAEDLDKMPYLQAVMKETMRMKPIAPLAVPHKSAKDTTLMGAKVAKGTCVMVNLYALHHDPNVWTEPYRF…
Epimedium_pubescens|Ebr02G024760.1		MEITLWAITTTVITVLSFAMISLRFKSSSSTKWPPGPKPLPIIGNLHQLGGDVLHVVLAKLAKGYGGVMTIWIGSWSPVIVVSDMDKAWEVLVNKSSDYSARHMAKLSKFLSANSQTIFTSDPGPLWQNLRKGLQHGPLGPLNISAQIHFQQRDIDRMVRDIHEEAVLNGGMAKPLQHLKKASTRLLSRLIFGHTFDDDSFIDSMQGVVQDGNELAGKAHLDEAFSYVKYLPSYKRTVKQFCVIKSRVEHLVRPFLTSSPPSNTYLNFLLAQDYPEEIIIFCIFELYLLGIESSSSTTTWALAFLIHDHAVQEKLYQEIKGKADGEHLLKAEDLDKMPYLQAVMKETMRMKPIAPLAVPHKSAKDTTLMGAKVAKGTCVMVNLYALHHDPNVWTEPYRF…
Epimedium_pubescens|Ebr02G024770.1		MEITLWAITTTVITVLSFAMISLRFKSSSSTKWPPGPKPLPIIGNLHQLGGDVLHVVLAKLAKGYGGVMTIWIGSWSPVIVVSDMDKAWEVLVNKSSDYSARHMAKLSKFLSANSQTIFTSDPGPLWQNLRKGLQHGPLGPLNISAQIHFQQRDIDRMVRDIHEEAVLNGGMAKPLQHLKKASTRLLSRLIFGHTFDDDSFIDSMQGVVQDGNELAGKAHLDEAFSYVKYLPSYKRTVKQFCVIKSRVEHLVRPFLTSSPPSNTYLNFLLAQDYPEEIIIFCIFELYLLGIESSSSTTTWALAFLIHDHAVQEKLYQEIKAPLKAEDLDKMPYLQAVMKETMRMKPIAPLAVPHKSAKDTTLMGAKVAKGTCVMVNLYALHHDPNVWTEPYRFMPERFL…
Epimedium_pubescens|Ebr02G024780.1		MEITLWAITTTVITVLSFAMISLRFKSSSSTKWPPGPKPLPIIGNLHQLGGDVLHVVLAKLAKGYGGVMTIWIGSWSPVIVVSDMDKAWEVLVNKSSDYSARHMAKLSKFLSANSQTIFTSDPGPLWQNLRKGLQHGPLGPLNISAQIHFQQRDIDRMVRDIHEEAVLNGGMAKPLQHLKKASTRLLSRLIFGHTFDDDSFIDSMQGVVQDGNELAGKAHLDEAFSYVKYLPSYKRTVKEFCVIKSRVEHLVRPFLTSSPPSNTYLNFLLAQDYPEEILIFCIFELYLLGIESSSSTTTWALAFLIHDHAVQEKLYQEIKGKADGEHLLKAEDLDKMPYLQAVMKETMRMKPIAPLAVPHKSAKDTTLMGAKVAKGTCVMVNLYALHHDPNVWTEPYRF…
Epimedium_pubescens|Ebr02G024790.1		MEITLWAITTTVITVLSFAMISLRFKSSSSTKWPPGPKPLPIIGNLHQLGGDVLHVVLAKLAKGYGGVMTIWIGSWSPVIVVSDMDKAWEVLVNKSSDYSARHMAKLSKFLSANSQTIFTSDPGPLWQNLRKGLQHGPLGPLNISAQIHFQQRDIDRMVRDIHEEAVLNGGMAKPLQHLKKASTRLLSRLIFGHTFDDDSFIDSMQGVVQDGNELAGKAHLNEAFSYVKYLPSYKRTVKEFCVIKSRVEHLVRPFLTSSPPSNTYLNFLLAQDYPEEIIIFCIFELYLLGIESSSSTTTWALAFLIHDHAVQEKLYQEIKGKADGEHLLKAEDLDKMPYLQAVMKETMRMKPIAPLAVPHKSAKDTTLMGAKVAKGTCVMVNLYALHHDPNVWTEPYRF…
Epimedium_pubescens|Ebr02G024800.1		MEITLWAITTTVITVLSFAMISLRFKSSSSTKWPPGPKPLPIIGNLHQLGGDVLHVVLAKLAKGYGGVMTIWIGSWSPVIVVSDMDKAWEVLVNKSSDYSARHMAKLSKFLSANSQTIFTSDPGPLWQNLRKGLQHGPLGPLNISAQIHFQQRDIDRMVRDIHEEAVLNGGMAKPLQHLKKASTRLLSRLIFGHTFDDDSFIDSMQGVVQDGNELAGKAHLDEAFSYVKYLPSYKRTVKQFCVIKSRVEHLVRPFLTSSPPSNTYLNFLLAQDYPEEIIIFCIFELYLLGIESSSSTTTWALAFLIHDHAVQEKLYQEIKGKADGEHLLKAEDLDKMPYLQAVMKETMRMKPIAPLAVPHKSAKDTTLMGAKVAKGTCVMVNLYALHHDPNVWTEPYRF…
Epimedium_pubescens|Ebr02G024810.1		MEITLWAITTTVITVLSFAMISLRFKSSSSTKWPPGPKPLPIIGNLHQLGGDVLHVVLAKLAKGYGGVMTIWIGSWSPVIVVSDMDKAWEVLVNKSSDYSARHMAKLSKFLSANSQTIFTSDPGPLWQNLRKGLQHGPLGPLNISAQIHFQQRDIDRMVRDIHEEAVLNGGMAKPLQHLKKASTRLLSRLIFGHTFDDDSFIDSMQGVVQDGNELAGKAHLDEAFSYVKYLPSYKRTVKQFCVIKSRVEHLVRPFLTSSPPSNTYLNFLLAQDYPEEIIIFCIFELYLLGIESSSSTTTWALAFLIHDHAVQEKLYQEIKGKADGEHLLKAEDLDKMPYLQAVMKETMRMKPIAPLAVPHKSAKDTTLMGAKVAKGTCVMVNLYALHHDPNVWTEPYRF…
Epimedium_pubescens|Ebr02G024820.1		MEITLWAITTTVITVLSFAMISLRFKSSSSTKWPPGPKPLPIIGNLHQLGGDVLHVVLAKLAKGYGGVMTIWIGSWSPVIVVSDMDKAWEVLVNKSSDYSARHMAKLSKFLSANSQTIFTSDPGPLWQNLRKGLQHGPLGPLNISAQIHFQQRDIDRMVRDIHEEAVLNGGMAKPLQHLKKASTRLLSRLIFGHTFDDDSFIDSMQGVVQDGNELAGKAHLDEAFSYVKYLPSYKRTVKQFCVIKSRVEHLVRPFLTSSPPSNTYLNFLLAQDYPEEIIIFCIFELYLLGIESSSSTTTWALAFLIHDHAVQEKLYQEIKGKADGEHLLKAEDLDKMPYLQAVMKETMRMKPIAPLAVPHKSAKDTTLMGAKVAKGTCVMVNLYALHHDPNVWTEPYRF…
Epimedium_pubescens|Ebr02G024830.1		MEITLWAITTTVITVLSFAMISLRFKSSSSTKWPPGPKPLPIIGNLHQLGGDVLHVVLAKLAKGYGGVMTIWIGSWSPVIVVSDMDKAWEVLVNKSSNYSARHMAKLSKFLSANSQTIFTSDPGPLWQNLRKGLQHGPLGPLNISAQIHFQQRDIDRMVRDIHEEAVLNGGMAKPLQHLKKASPRLLSRLIFGHTFDDDSFIDSMQGVVQDGNELAGKAHLDEAFSYVKYLPSYKRTVKEFCARLDEAFSYVKYLPSYKRTVKEFCVIKSRVEHLVRLFLTSSPPSNTYLNFLLAQDYPKEIIIFCIFELYLLGIESSSSTTTWALAFLIHDHAVQEKLYQEIKGKADGEHLLKAEDLGKMSYLQAVMKETMRMKPIAPLAVPHKSAKDTTLMGAKVAK…
Epimedium_pubescens|Ebr02G024840.1		MEITLWAITTTVITVLSFAMISLRFKSSSSTKWPPGPKPLPIIGNLHQLGGDVLHVVLAKLAKGYGGVMTIWTGSWSPVIVVSDMDKAWEVLVNKSSDYSARHMAKLSKFLSANSQTIFTSDSGPLWQNLRKGLQHGPSGPRNISAQIHFQQRDIDRMVRDIHEEAVLNGGMAKPLQHLKKASTRLLSRLIFGHTFDDDSFIDSMQGVVQDGNELAGKAHLDEAFSYVKYLLSYKRTVKEFCVIKSRVEHLVRPFLTSSPPSNTYLNFLLAQDYPEEIIIFCIFELYLLGIDSSSSTTTWALAFLIHDHAVQEKLCQEIKGKADGEHLLKAEDLGKMSYLQAVMKETMRMKPIAPLAVPHKSAKDTTLMGAKVAKGTCVMVNLYALHHDPNVWTEPYRF…
Epimedium_pubescens|Ebr02G024850.1		MISLRFKSSSSTKWPPGPKPLPIISNLHQLGGDVLHVVLAKLAKGYGGVMTIWIGSWSPVIVVSDMDKAWKVLVNKSSDYSALHMAKLSKFLSANSKTIFTSDSGPLWQNLRKGLQHRPSGPRNISAQIHFQQRDIDRMVLDIHEEAVLNGGMAKPLQHLKKASTRLLSRLIFGHTFDDDSFIDSMQGVVQDGNELAGKAHLDEAFSYVKYLPSYKRTAKEFCVIKSRVEHLVRPFLTSSPPSNTYLNFLLAQDYPEEIIIFCIFELYLLGIDSSSSTTTWALAYLIHDHAVQEKLYQEIKGKADGKHLLKAEDLGKMPYLQAVMKETMRMKPIAPLAVPHKSAKDTTLMGAKVAKGTCVMVNLYALHHDPNVWSEPYRFMPERFLQGKVKEFEKSFLL…
Epimedium_pubescens|Ebr02G024860.1		MISLRFKSSSSTKWPPGPKPLPIIGNLHQLGGDVLHVVLAKLAKGYGGVMTIWIGSWSPVIVVSDMDKAWKVLVNKSSDYSACHMAKLSKFLSANSKTIFTSDSGPLWQNLRKGLKHGPSGPRNISAQIHFQQRDIDRMVRDIHEEAVLNGGMAKPLQHLKKASTRLLSRLIFGHTFDDDSFIDSMQGVVQDGNELAGKAHLDEAFSYVKYLPSYKRTAKEFCVINSRVEHLARPFLTSSPPSNTYLNFLLAQDYPEEIIIFCIFELYLLGIDSSSSTTTWALAYLIRDHAVQEKLYQEIKGKADGEHLLKAKDLGKMPYLQAVMKETMRMKPIAPLAVPHKSAKDTTLMGAKVAKGTCVMVNLYALHHDPNVWTEPYRFMPEKFLQGKVKEFEKSFLP…
Epimedium_pubescens|Ebr02G024870.1		MEITLWAITTTVITVLSFAMISLRFKSSSSTKWPPRPKPLPIIGNLHQLGGDILHVVLAKLAKGYGGVMTIWIRSWSPVIVVSDMDKAWKVLVNKSSDYSARHMAKLSKFLSANSQTIFTSDSGPLWQNLRKGLQHGPSGPRNISAQIHFQQRDIDRMVRDIHEEGVLNGGMAKPQQHLKKASTRLLSRLIFGHTFDDDSFIDSMQGVVQDGNELAGKAHLDEAFSYVKYLPSYKRTVKEFCVIKSRVEHLVRPFLTSSPPSNTYLNFLLAQDYPEEIIIFCIFELYLLGIDSSSSTTTWALAYLIHDHAVQENLYQEIKGKADGEHLLKAEDLGKMPFLQAVMKETMRMKPIAPLAVPHKSAKDTTLMGAKVAKGTCVMVNLYALHHDPNVWTEPYRF…
Epimedium_pubescens|Ebr02G024880.1		MEITLWAITTTVITVLSFAMISLRFKSSSSTKWPPGPKPLPIIGNLHQLGGDVLHVVLAKLAKGYGAVMTIWIRSWSPVIVVSDMDKAWKVLVNKSSDYSHATWLNCPNFSLLTPKPSSHPTPVHYGENLRKGLRTGRRVHGISLHKSIFSRDIDRMVRDIHEEAVLNGGMANPLQHLNKASTRLQSRLIFGHTFDDDSFIDLMQGVVQDGNELAGKAHLDEAFSYVKYLPSYKRTVKEFCVIKSRVEHLVRPFLTSSPPSNTYLNLLLAQDYPEEIIIFCIFELYLLGIDSSSSTTTWALAFLIHDHAVQEKLYQEIKGKADGEHVLKAEDLGKMPYLQAAMKETMRMKPIAPLAVPHKSAKDTTLMGAKVAKGTCVMVNLYALHHDPNVWTEPYRFM…
Epimedium_pubescens|Ebr02G024900.1		MEITLWAITTTVITVLSFAMISLRFKSSSSTKWPPGPKPLPIIGNLHQLGGDVLHVVLAKLAKGYGGVMTIWIGSWSPVIVVSDMDKAWKVLVNKSSGYSARHMAKLSKFLSANSQTIFTSDSGPLRQNLQKGLQTAVSPRNISAQIHFQQRDIDRMVRDIHEEAVLNGGMAKPLQHLKKASTRLLSRLVFGHTFDDDSFIDSMQGVVQDGNELAGKAHLDEAFSYVKYLPSYKRTVKEFCVIKSRVEHLVRSFLTSSPPSNTYLNFLLAQDYPEEIIIFCIFELYLLGIDSSSSTTTWALAYLIHDHAVQEKLYQEIKGKADGEHLLKAEDLGKMPYLQAVMKETVRMKPIAPLAVPHKSAKDTTLMGAKVAKGTCVIINLYALHHDPNVWTEPYRFM…
Epimedium_pubescens|Ebr02G024910.1		MEITLWAITTTVITVLSFAMISLRFKSSSSTKWPPGPKPLPIIGNLHQLGGDVLHVVLAKLAKGYGGVMTIWIGSWSPVIVVSDMDKAWEVLVNKFSDYSARHMAKLSKFLSANSQTIFTSDSGPLWQNLRKGLQRGPSGPRNISAQIHFQQRDIDRMVRDIHEEAVLNGGMAKPLQHLKKASTRLLSRLIFGHTFDDDSFIDSMQGVVQDGNELAGKAYLDEAFSYVKYLPSYKRTVKEFCVIKSRVEHLVRPFLTSSPPSNTYLNFLLAQDYPEEIIIFCMFELYLLGIDSSSSTTTWALAFLIHDHAFQEKLYQEVKGKAVGEHLLKAQDLGKMPYLQAVMKETMRMNPIAPLAVPHKSVKDTTLMGAKVAKGTCVMVNLYALHHDPNVWTEPYRF…
Epimedium_pubescens|Ebr02G024920.1		MEITLWAITTTVITLLSFAMISLRFKSSSSTKWPPGPKPLPIIGNLHQLGGDVLHVVLAKLAKGYGGVMTIWIGSWSPVIVVSDMDKASKVLVNKSSDYSARHMAKLSKFLSANSQTIFTSDSGPLWQNLRKGLQHGPSGPRNISAQIHFQQRDIDRMVRDIHEKAVLNGGMAKPLQHLKKASTRLLSRLIFGHTFDDDSFIDSMQGVVQDGNELAGKAHLDEAFSYVKYLPSYKRTVKEFCVIKSRVEHLVRPFLTSSPPSNTYLNFLLAQDYPEEIIIFCIFELYLLGIDSSSSTTTWAPAYLIHDHAVQEKLYQEIKGKADGEHLLKAEDLGKMPYLQAVMKETMRMKPIAPLAVPHKSAKDTTLMGAKVAKGTCVMVNLYALHHDPNVWTGPYRF…
Epimedium_pubescens|Ebr02G024940.1		MEITLWATTTTVITVLSFAMISLRFKSSSSTKWPPGPKPLPIIGNLHQLGGDVLHVVLAKLAKGYGGVMTIWIGSWSPVIVVSDMDKAWKVLVNKSSDYSARHMAKLSKFLFANSQTIFTSDSGPLWQNFRKGLQHGPSGPRNISAQIHFQQRDIDRMVRDIHEEAVLNGGMAKPLQHLKKASTRLLSRLIFGHTFDEDSFIDSMQGVVQDGNELAGKAHLDEAFLYVKYLPSYKRTVKEFCVIKSRVEHLVRPFLTSSPRSNTYLNFLLAQDYPEEIIIFCIFELYLLGIDSSSSTTTWALAFLIHDHAVQEKLYQEIKGKADAEHLLKAEDLGKMPYLQAVMKETMRMKPIAPLAVPHKSAKDSTLMGAKVAKGACVMVNLYALHHDPNVWTEPYRF…
Epimedium_pubescens|Ebr02G024950.1		MEITLWAITTTVITVLSFARISLRFKSSSSTKWPPGPKPLPIIGNLHQLGGDVLHVVLAKLAKGYGGVMTIWIGNWSPVIVVSDMDKAWEVLVNKSSDYSARHMAKLSKFLSANSQTIFTSDSGPLWQNLRKGLQHGPSGPRNISAQIHFQQRDIDRMVRDIHEEAVLNGGMAKPLQHLKKASTRLLSRLIFGHTFDDDSLIDSMQGVVQDGNELAGKAHLDEAFSYVKYLPSYKRTVKEFCVIKSGVEHLVRPFLTSSPPTNTYLNFLLAQDYPEEIIIFCIFELYLLGIDSSSSTTTWALAYLIHDHAVQEKLYQEIKGKADGEHLLKAEDLGKMPYLQAVMKETMRMKPIAPLAVPHKYAKDTTLMGAKVAKGTCVMVNLYALHHDPNVWTEPYRF…
Epimedium_pubescens|Ebr02G039540.1		MEDNLLVVTAIVLMVSAMTIILGKTKTSTSFSSTQWPAGPKTLPIIGNHHQLGGDVFHVVLAKLGKLHGGVMTIWFGSWRPVIVISDIDTAWEVLVTKSSDYSARDHFSDFANPASTQLINIFASDSGPIWHNLRKALQNGPLGPLNVSAQISLQETDMEQMIRDMEQEAALNDGLVKPLDHLKKATLRLLSRLIFGNSFNNDSFIESMQYAVEDMIQIGGSVRLAQAFSYAKYLPSYKKAVKEFDQLKVRLENLLQPFLSSEDYPINSYINILQSQGYPEGIIRSCIFELYILGMDSTASTTTWALAYLIHDQVVQKKLYQDIKDKAGISSLVKAENLCNMEYLQAMMKETMRVKPIAPLALPHKAAKDTTLMGTKVAMGTLVIVNLYALHHDPNIWE…
Epimedium_pubescens|Ebr06G023080.1		MEGHMYLVCAIVLIVSTIAIILRRTKSSSSTSSTIWPAGPKTLPFIGNLHQLRGDAFHIVLTKLSKLHGGVMTIWVGSWRPVIVISDIDKAWEVLVTKSSDYSARDDKFPRIVRTTLSEWQFINSLDSSPLWHQLRKGLQNGPLGPFNISAQTSFQEGEMEQIIRDIQEEATQKGGIVKPLDHLKRATLRLLSRLIFGQTFNDDSFIESVHYAVDEMIRIITCLSLLEAFSYAKYLPRYKHAVKELHQLKVRIEDMLRPLIASTDPPENSYLHFLQSLCYTEELIGACIFELFTLGVDSTASTTTWALAFLIHNQLVQEKLYQDIKRQAGVVKVSDLSNMEYLQAVMKETMRMKPIAPLAIPHKAEKDTTLMGRKVAKGTVVLVNLYALHHDANMWEDP…
Lindera_megaphylla|GWHPBKHA006662		MEVLWIIIVAMAMAVVFALENARQRLRSKGSKTMVWPVGPRSLPIIGNLHQLCKGGKLLHVTLASLAQEYGRIMTIWIGSQHPTIIVSDHELAWEVLVSKAQEYASRTLPYMSKFVTADWQTLATSDAGPYWHALRKGLQNSALNPSNITAQVQFQEKDIESMTQSLWEEACKNNGVVEPLIQLRRTTVKLVGRLCFGPEFDDELFVQGMDAAVEDTIRLTGFARLVDVFEFTQYIPGLKLPFEQTYQVKRKIEDLVLPYIARQRKSESPSTNCYLYFLLSQDLPEQVVIFSVFELFLLGVDSTSMASAWALGFLIHDKETQHKLYEEISQGGRDTITVESVGKLQYLHAVVKESMRLKPIAPLAVPHKAVKDSTLMGMRVLRGTSVLVNLYAVLRDGS…
Lindera_megaphylla|GWHPBKHA024113		MDMKAIWTAFAIGIAAAVLLAFGRRRRQPLNGKPTQWPPGPSKLPIIGNMNQILIGGDPFHVYLNKLNQVYGPLITVWLGTRQPNILVSDPDLAWEVFVSKSADYSARGLPTLEKLLTADFRTIVSSNTGPHWHSLRRGLQTSAIGPFCISVQAPLQESDMAQMINDIIKEASLNGGVVKPYHHIRRATIRLLARLCFGPDFSDEDFDATMDVLVEDGMKYSDAARLVDAFPPARFLPSIKRTIKQTEELKLRIAECIEFHLTTPPPPNCYAHFLLSQSFPREVVIFSIFEVFYLGVDSTGSTTLWALALLVNNQEAQEKLYQEIRDHTTCTDKGIVRVEELGKLEYLQAVVKETMRMKPIAPFAHHKAARDTALNGLHVAEGTTVMVNLYALHYDRKV…
Lindera_megaphylla|GWHPBKHA024116		MDMKAIWTAFAIGIAAAVLLAFGRRRRQRLDGKPTQWPPGPSKLPIIGNMNQILKGGDPFHVYLNKLNQVYGPLITIWLGSRQPNILVSDPDLAWEVFVSKSADYSARSLPTLEKLVTADFRTIITSNIGPHWHSLRRGLQTSAIGPLCISVQASLQESDMAQMINDIIKEASLNGGVVKPYHHIRRATIRLLARLCFGPDFGDEDFDATMDVLVEDGMKYSDAARLVDAFPPVRFLPSIKRTIKQTEKLKLRIAECIEFHLTTPPPPNCYAHFLLSQSFPREVVIFSIFEVFYLGVDSTGSTTLWALALLVNNQEAQEKLYQEIRDHTTCTDKGIVRVEELGKLEYLQAVVKEAMRMKPIAPFAPHKAARDTALNGLHVAEGTTVIVNLYALHYDPKV…
Lindera_megaphylla|GWHPBKHA024121		MDMEAIWTVFAIGIAAAVLLAFGRRRRQRHNGKPTQWPPGPSQLPIIGNMHQIVKGGDPFHIYLNKLAQVYGPLITVWLGTRQPTIIVSDHDLAWEVLVSKSPDYAARELPTLSKLVTADFRTIVSSNAGPHWHSLRRGLQNDAIGPLCISIQAPLQESDMAQMINDIIKEASLNEGVVKPFHHIRRATIRLLARLCFGPDFSDENFDATIDVLVEDGMKYSDAARLVDAFPPVRFLPSIKRTIKQIEKLKLRIAECIGFHLTTPPPPNCYAHFLLSQSFPREVAIFSIFEVFSLGLDSTGSTTLWALGLLVNNQEAQEKLYQEIRNHTTCTDKGIVRVAEVGKLAYLQAVVKETMRMKPIAPFAVPHKAARDTALNGLHVAEGTTVMVNLYALHYDPK…
Lindera_megaphylla|GWHPBKHA024125		MEAIWTAVAIGIAAAVLIAFGRRQRRNGNPTQWPPGPPKLPILGNKHQIARGGDPLHIALTKLAQVHGTLMTVWLSSREPNIIVSDQDLAREVLVSKSSDFAGRQFPAFPFKFVTADYRIIFTSSAGPHWHGLRRGFQSEAISPQGLSAQAPLQESDMSKMINEMIKEASFNGGVVKPFPHIRRATIRLLARLCFGPDFSDEDFDTTMDILIQDSMRYSDDFRLVNAFPPARFLPSVKRSIALMEKLKLRFEECIGRHLTSPPSPNCYAHFLLSQSFPRELAIFSIFEVFALGLDSTGSTTLWALALLVHNQEAQQKLYQEIRDHNSRTEKGIVRANEVGKLEYLQAVVKETTRMKPIAPLAVPHIAVTDTVLKGMHVAKGTSVMVNLYALHYDPKVWD…
Liriodendron_chinense|Lchi05430		MDMNMNMWIVVSMVVGVMFLVLQRLQRPTSTMKFPPGPPKLPIIGNLHQNLHQLGKGGELIHITLFKMSQKYGGIMTVWLGLKPTIVISDDKGAWEVLVNKSPDYASRITPYLSKYVTTDWKTIASSDHGPYWQSLRKAVAITQRIEEQAAVSGGIIHPLVDIRQNIIRVVARLCFGPDFNNEAFIVGMDPLIEDVTNLTGIARIADAFPLIRYIPGLWLPFKLATKAKHGIISLIQPKITRYQSSKSPCTTCYLHFLLSHSYPMETIIFTLFEMFLLSVDSTSSTIVWALAFLIRNPEIQQKLYKEVSGGDQKRERVTVEQVSKLPYLQSVVNEVMRMKPIAPLSIPHKTANDTTLMGMKINKDTYVMVNLYAVLNDPNVWDDPERFMPDRFVNKTAS…
Liriodendron_chinense|Lchi02214		MSMNTWLAVCMVLGVMLLVLERLQRSTSTTKYPPGPPKLPIIGNLHQNLRQLGKGGELIYITLFKMSQKYGGVMTVWIGLKPLIIVSDHKGVWENTIRVVARLCFGPDFNNETFNVVMDGLLHDVTGLASFAHMSDAFPLFRYIPGLWLPFKLATKARDGIVSLIQPEITRYQSSKSPCTTCYLHFLLSNGYPMEVIIFTIFEMFFLSVDSTSSLISWALALLIRNPEIQEKLYKEVSGGDKKREKVTVEQVSKLPYLQAVMNEVMRMKPTAPLSIPHKTVKDTTLMGMKINKGTAVMVNLYAVLNDPKVWKDPERFMPERFLNQNSGGAGVDIAIERSFVPFGAGRRICAGMELAKLHAGLTLSNLINRFEWLAADGDGPDMSVDFTVVLRMKKPLVA…
Liriodendron_chinense|Lchi30926		MRIDGTVYFRAFTGRGLVLERLRRPKSTMKLPPGPPKLPIIGNLHQNLRQLGGGGELIHITLFKLSQKYGGIMTVWLGMKPTIVISDLEGAWEVLVNKSADYASRMLPYMSKYITANWTTLLSSDHGPYWQSLRKGVQGYAMNPSTISMQTLSQENEALALTQSIHEQAAVNGGIVHPLVHIRHNTIRVVGRLCFGPDFNNEAFVVGIDPFIDDVINISALARFADAFPFIRHIPGLRGPFRQAAEIRDGIVSMVQPEITRYQSSKSPCTTCYLHFLLSHGYPMETIIFTLFEMFMLSVDSTSTATAWALAFLIRNPEIQEKLFKEVSGGDQKRERVNVDQVIKMPYLQAVVSEVFRMKPIAPLAIPHKTVNDTTLTGLKIDKGTAVIVNIYAVLHDPK…
Cinnamomum_kanehirae|CKAN_01919300		MEGIWTAIVICFAAAVLIAFGRRQRRSGKPTQWPPGPSRLPLIGNMHQILKGGDPFHVAINKLAQVYGPLMTVWFGTRQPTIIVSDHDLVWEVLVSKSPDYAAREFPTLAKLVSADYRTIVSSDAGPHWHSLRRGLQNGAIGPLCISVQAPLQEYDIAQMINDMIKEANLNGGVVKPFHHIRRATIKLLSRLCFGSDFNDEEFDATMDVIVEETFKYTDDARILDTFPPARFLPSVKRAIMQMEKLKLRVEECIGRHLTSPPPPNCYAHFLLSQSFPREVAIFSIFEVFVLGLDSIGSTTMWALGLLVHNQEAQQKLYQEIRDHATCTEKGIVKVEEVGKLEYLQAVVKETMRMKPIAPLAVSHKAARDTTLDGLHVAEGTTVMVNLYALHYDPKVWDE…
Cinnamomum_kanehirae|CKAN_01919000		MEAIWTAVAIGIAAAVLMAFRGRQRQRLSRKPTQWPPGPTRLPLIGNMHQILKGGDPFHVAINKLAQVYGPLMTVWFGTRQPTIIVSDHNLVWEVLVSKSADYAAREIPITLKPSLADFRTIVSSNAGPLWHSLRRGLQNGAIGPHSLSLQAPFQESDMAQMINNMIKEANLNGGVVKPFPHIRRAIIKLLARICFGCDFSDEEFDATMDFMVEEALRYSDDSRILDTFPPARFLPSVKRAVMQMEKVKLRLMECIGRAPRFPSTSHLLRSLPPLTELPERSSHLQHLRAVSPRRGQHRVDDHVWGLGLLMQNQEAQQKLYQEIREHAGCNEKGVVKVEEIGKLEYLQAVAKETMRMKPIAPLAVPHQAARDTTLDGLHVAEGTTVLANLYALHYDPKV…
Cinnamomum_kanehirae|CKAN_01919500		MDMEAIWTAFAIGIAAAVLLAFGRRQWRNGKPTQWPPSPPKLPIIGNMHQILKGCDPFHIALNKLAQVYGPLITVWLGTRQPTIIVSDHDLAWEVLVSKSPDYAAREFPTLAKLVTADFRTIVSSNAGPHWHSLRRGLQNGAIGPLCISGQAPLQESDMAQMINDMIKEASLNGGVVKPFPHIRRATIRLLARLCFGPDFSDEDFDGTMDVLVEDTMKYSDAARLVDAFPPTRFLPSIKRTIKQTEKLKLRIAECIGFHLTTPPPPNCYAHFLLSQSFPREVAIFSIFEVFSLGLDSTGSTTLWALGLLVNNQEAQQKLYQEIRDHAICTDKGIVRVEEVGKLEYLQAVVKETMRLKPIAPLAVPHKAARDTAWNGLHVAEGTTVMVNLYALHYDPKVW…
Cinnamomum_kanehirae|CKAN_01918300		MEAIWTAVAIGIAAAVLMAFRGRQRQRLSRKPTQWPPGPTRLPLIGNMHQILKGGDPFHVAINKLAQVYGPLMTVWFGTRQPTIIVSDYNLVWEVLVSKSADYAAREIPITLKPVLADFRTIVSSNAGPLWHSLRRGLQNGAIGPHSLSLQAPFQESDMAQMINNMIKEANLNGGVVKPFPHIRRAIIKLLARICFGCDFSDVEFDATMDFMLEETLWYSDDSRILDTFPPARFLPSIKRAVMQMEKVKLRLMECIGRPLDSPLPPTCYAHFLLSQSFPREAAIFSIFELFLLGVDSTGSTTMWALGLLMQNQEAQQKLYQEIRDHASCNQKGVVTVEEIGKLEYLQAVAKETMRMKPIAPLAVPHQAARDTTLDGLHVAEGTTVLANLYALHYDPKVW…
Cinnamomum_kanehirae|CKAN_01919800		MEGIWTAIVICFAAAVLIAFGRRQRRSGKPTQWPPGPTRLPLIGNMHQILKGGDPFHVAINKLAQVYGPLMTVWFGTRQPTIIVSDHDLVWEVLVSKSPDYAAREFPTLAKLVSADYRTIVSSDAGPHWHSLRRGLQNGAIGPLCISVQAPLQEYDIAQMINDMIKEANLNGGVVKPFHHIRRATIKLLSRLCFGSDFNDEEFDATMDVIVEETFKYTDDARILDTFPPARFLPSVKRAIMQMEKLKLRVEECIGRHLTSPPPPNCYAHFLLSQSFPREVAIFSIFEVFVLGLDSIGSTTMWALGLLVHNQEAQQKLYQEIRDHATCTEKGIVKVEEVGKLEYLQAVVKETMRMKPIAPLAVSHKAARDTTLDGLHVAEGTTVMVNLYALHYDPKVWDE…
Cinnamomum_kanehirae|CKAN_01919200		MEGIWTAIVICFAAAVLIAFGRRQRRSGKPTQWPPGPTRLPLIGNMHQILKGGDPFHVAINKLAQVYGPLMTVWFGTRQPTIIVSGHDLVWEVLVSRSADYAAREITSIAKSGTADYRTIVSSDAGPHWHSLRRGLQNGAIGPLSLSFQAPLQESDMAQMINNMIKEANLNGGVVKPFHHIRRATIKLLSRLCFGSDFNDEEFDATMDVMVEEALKYTDDARIVDTFPPARFLPSVKRAIMQMEKMKLRVEECIGRHLASPPPPNCYAHFLLSQSFPREVTIFSIFEVFLLGVDSTGSTTMWALGLLVHNQVAQQKLYQEIRDHATCNEKGIVKVEEVGKLEYLQAVVKETMRMKPIAPLAVPHQAARDTTLDGLHVAEGTTVMVNLYALHYDPKVWDE…
Cinnamomum_kanehirae|CKAN_01919100		MEAIWTAVAIGIAAAVLMAFRGRQRQRLSRKPTQWPPGPTRLPLIGNMHQILKGGDPFHVAINKLAQVYGPLMTVWFGTRQPTIIVSDHNLVWEVLVSKSADYAAREIPITLKPSLADFRTIVSSNAGPLWHSLRRGLQNGAIGPHSLSLQAPFQESDMAQMINNMIKEANLNGGVVKPFPHIRRAIIKLLARICFGCDFSDEEFDATMDFMVEEALRYSDDSRILDTFPPARFLPSVKRAVMQMEKVKLRLMECIGRPLDSPLPPTCYAHFLLSQSFPREVAIFSIFELFLLGVDSTGSTTMWGLGLLMQNQEAQQKLYQEIREHAGCNEKGVVKVEEIGKLEYLQAVAKETMRMKPIAPLAVPHQAARDTTLDGLHVAEGTTVLANLYALHYDPKVW…
Cinnamomum_kanehirae|CKAN_01918200		MEAIWTAVAIGIAAAVLMAFRGRQRQRVSRKPTQWPPGPTRLPLIGNMHQILKGGDPFHVAINKLAQVYGPLMTVWFGTRQPTIIVSDHNLVWEVLVSKSADYAAREIPITLKPSLADFRTIVSSNAGPLWHSLRRGLQNGAIGPHSLSLQAPFQESDMAQMINNMIKEANLNGGVVKPFPHIRRAIIKLLARICFGCDFSDEEFDATMDFMVEEALRYSDDSRILDTFPPSRFLPSVKRAVMQMEKVKLRLMECIGRPLDSPLPPTCYAHFLLSQSFPREVTIFSIFELFLLGVDSTGSTTMWALGLLMQNQEAQQKLYQEIREHASCNEKGVVKVEENGKLEYLQAVAKETMRMKPIAPLAVPHQAARDTTLDGLHVAEGTTVLANLYALHYDPKVW…
Cinnamomum_kanehirae|CKAN_01917800		MELIWTAVAIAIAAAVLMAFGRRQRPDGTQNQWPPGPPKLPIIGNMHQIAKGGDPFHIALTKLAQVHGPLMTVWLGARQPTIIVSDHDLAWEVLVSKSPDFAGREFPALPYKFVTADFRTIVTSNAGPHWHGLRRGLQNEAIGPLGLSVQAPLQESDMTKMINDMIKEASLNGGVVKPFHHIRRATIRLLARLCFGPDFSDEDFDTTMDILIEDAMQYSGDSRLVDAFPPARFLPSVKRTVVLTEKLKLRIAECIGRHLTSPPPPNCYAHFLLSQSFPREIAIFSIFEVFILGVDSTGSTTMWALGLMVQNQDAQLKLYQEIRDRTTRNEKGIVKVGDVGKLEYLQAVVKETMRMKPIAPMAVPHKAVKDTFLKGMPVAEGTTVMVNLYALHYDPKVWD…
Cinnamomum_kanehirae|CKAN_01917900		MREAIRTGIAIGIAAAVLMAFRGRQRQRLSRKPTQWPPGPTRLPLIGNMHQILKGGDPFHVAINKLAQVYGPLMTVWFGTRQPAIIVSDHDLVWEVLVSKSADYAAREFPTLAKLVSADSGTIVSSDAGPHWHSLRRGLQNGAIGPLCISVQAPLQEYDIAQMINDMIKEANLNGGVVKPFHHIRRATIKLLARLCFGSDFSDEEFDATMDVIVEEAFKYIDDARILDTFLPARFLPSVKRAIMLMEKLKLRVEECIGHQLASPPPPNCYAHFLLAQSFPREVTIFSIFEVFVLGLDSIGSTTMWALGLLVHNQEAQQKLYQEIRDHATCTEKGIVKVEEVGKLEYLQAVVKETMRMKPIAPLAVPHKAARDTTLDGLHVAEGTTVMVNLYALHYDPKV…
Cinnamomum_kanehirae|CKAN_01919400		MEAIWTAVAIGIAAAVLIAFRERQRQRLSRKPTQWPPGPTRLPLIGNMHQILKGGDPFHVVINKLAQVYGPLMTVWFGTRQPTIIVSGHDLVWEVLVSKSADYAAREIPSIFKSSTTTYSTISTSDASPHWHSLRRGFQNGAIGPLSLSVQAPFQESDMAQMINNMIKEANLNGGVVKPFQHIRRATIKLLARLCFGSDFNDEDFEANMDFMVDEALRCNDEARILDTFPAARFLPSVKRTIMKMEKLQLRVEEYIGRHLASPPPPNCYAHFLLSQNFPIGVAISSIFEVFILGLDSTGSTTMWALGLLVHNQEAQQKLYQEIRDHATCTEKGIVKVEEVGKLEYLQAVVKETMRMKPIAPLAVPHRAARDTTLDGLHVAEGTTVLVNLYALHYDPKVW…
Cinnamomum_kanehirae|CKAN_01919700		MEAIWTAVAIGIAAAVLIAFRERQRQRLSRKPTQWPPGPTRLPLIGNMHQILKGGDPFHVVINKLAQVYGPLMTVWFGTRQPTIIVSGHDLVWEVLVSKSADYAAREIPSIFKSSTTTYSTISTSDASPHWHSLRRGFQNGAIGPLSLSVQAPFQESDMAQMINNMIKEANLNGGVVKPFQHIRRATIKLLARLCFGSDFNDEDFEANMDFMVDEALRCNDEARILDTFPPARFLPSVKRTIMKMEKLQLRVEEYIGRHLASPPPPNCYAHFLLSQNFPIGVTISSIFEVFILGLDSTGSTTMWALGLLVHNQEAQQKLYQEIRDHATCTEKGIVKVEEVGKLEYLQAVVKETMRMKPIAPLAVPHRAARDTTLDGLHVAEGTTTKCGMNRSGSSRSES…
Cinnamomum_kanehirae|CKAN_00793800		MISSFLCSSFFFLKLNERKGKQAEERPETRRCTRGTLLHVSDMSEFRHVRSPADILEESGSPFGPIKKSTETNHHQSIPSLVYKCLHLKTPGGDCDQRVRRRWYGLSDLWNLPIIGNLHQLYKGGNLLHVTLASLAQEYGRIMTIWIGSQHPTIIVSDHELAWEVLVSKAQEYAARTLPYMSKFVTADWQTLATSDAGPYWHALRKGLQNSALNPSNISAQVQFQENDIESMTQSLWEEACNNNGVVEPLIQLRRTTVKLVGRLCFGPEFDDEVFVQGMDSAVEDTIRLTGFARLVDVFEFTQYIPGLKLPFEQTYQVKRKIEDLVLPYIARQRKSESPSTNCYLYFLLSQDLPEQVVIFSVFELFLLGVDSTSMATAWALGFLIHDKETQHKLYEEIS…
Cinnamomum_kanehirae|CKAN_02120200		MEAIWTAVAIGIAAAVLMAFRGRQRQRLSRKPTQWPPGPTRLPLIGNMHQILLKGGDPFHVAINKLAQVYGPLMTVWFGTRQPTIIVSDHNLVWEVLVSKSADYAAREIPITLKPSLADFRTIVSSNAGPLWHSLRRGLQNGAIGPHSLSLQAPFQESDMAQMINNMIKEANLNGGVVKPFPHIRRAIIKLLARICFGCDFSDEEFDATMDFMVEEALRYSDDSRILDTFPPARFLPSVKRAVMQMEKVKLRLMECIGRPLDSPLPPTCYAHFLLSQSFPREVAIFSIFELFLLGVDSTGSTTMWGLGLLMQNQEAQQKLYQEIREHASCNEKGVVKVEELGKLEYLQAVAKETMRMKPIAPLAVPHQAARDTTLDGLHVAEGTTVLANLYALHYDPKV…
Cinnamomum_kanehirae|CKAN_02119900		MEAIWTAVAIGIAAAVLMAFRGRQRQRLSRKPTQWPPGPTRLPLIGNMHQILKGGDPFHVAINKLAQVYGPLMTVWFGTRQPTIIVSDHNLVWEVLVSKSADYAAREIPITLKPSLADFRTIVSSNAGPLWHSLRRGLQNGAIGPHSLSLQAPFQESDMAQMINNMIKEANLNGGVVKPFPHIRRAIIKLLARICFGCDFSDEEFDATMDFMVEEALRYSDDSRILDTFPPSRFLPSVKRAVMQMEKVKLRLMECIGRPLDSPLPPTCYAHFLLSQSFPREVAIFSIFELFLLGVDSTGSTTMWGLGLLMQNQEAQQKLYQEIREHASCNEKGVVKVEELGKLEYLQAVAKETMRMKPIAPLAVPHQAARDTTLDGLHVAEGTTVLANLYALHYDPKVW…
Aristolochia_fimbriata|Af03G225200.1		MDFSVGLMTLFLGSTFILLLIIFTTKRSQQKHPWPPGPPKLPIIGNLHQLQKGGPLLHITLAEMAKQYGKIMTVWLGNRPTIVVSDYESVWEVLVTKSSDYASRSMPYRSKFITAGWRTLSTFDFSDTWFNLRKGAQSSFFHPANVSGQSPLQESDVEQLIRSIEEEAKRNIHGVVSPLPHIRKSVIRLIARLCFGPDFRDEKFVEAMDVMIEEAILQSSLNVVGDIFPMLQHVPGFKKPFRKVNKVKCRIRELIRPCIDRYASSSSSKKKNYYYLQFLLSQGFPLEVVIFNIYEMFLLAVDSTSMTIAWALGFLIHDQQIQDKLYKELISREYGKEGALGMEQVSKMKYLQGVVKESARLRPIAPLAIPHKAVKDTTLKGERVEAGTTVMVNLYAVLH…
Aristolochia_fimbriata|Af03G218100.1		MDFSVGLMTLFLGSTFILLLIIFTRKRSQKHPWPPGPPKLPIIGNLHQLQKGGPLVHITLAEKAKQYGKIMTVWFGTKPTIVVSDYGSVWEVLVTKSSDFASRSMPYRGAQSSFFHPANVLAQTPFQESDVHKYLIRSIEKEASENDGVVNPLPHIRKNVVRLIGRLCFGPHFRDEEFVESIDVIIEDTFKQPDLKDRLADLFPYLRHVPGFKQPFREAYKMKQRIEELISPCLDQYYLPSSSSSSKENYNHYLHFLLSQGFPQEVVIFSLFEMFLLAVDSTSLTTAWALAFLIHDQQIQDKLFEELSRDGKEGALGIEQVRNMKYLKAVVKESARMRPIAPLAIPHKAVKETTLKVLHDPAVWNDPSRFDPDRFLENTVWPQGNLGDKEEDAAMTAME…
Aristolochia_fimbriata|Af03G220500.1		MFQKEILRKEIVRLCFQFSIPRRALSLVQAVKEDPSLCLQQNLLIRHLLDQGLYEDVLSLYRKLNDLYCGSDNYTYPSVIKACTFLSATQTGKEIHCNIFRNGYESNVVIQTALLDLYAKNRNMEAACKVFDGISKRDLVCWNALLSGYSSNGLDQKALEIYYEIRRRGLKPNLITFLSTVPVCTRLGAFEVGKSIHGLGVKFGLSSDESSLPALISMYSIFEDLSSARMLFGLSAAKSVAIWNSMISASTQNKDGDEAFQLFQQMLRSHIRPDLVTFVSVLPSCDVLVNVGKSIHACTIKHGFEHQTSVATGLISMYTKLGGLEAAKFLFDQMSSKNQLSWNSILCGYVKNGFPELGLDALCEMQLQGLRPDSVSIIGALSACGELKDMLLGRAAHGY…
Aristolochia_fimbriata|Af03G218600.1		MDFCVGLMTLFLGSTTLIILLLIFTNRSQKHPWPPGPPKLPMIGNLHQLQKGGPLVHITLAEMAKQYGKIMTVWFGNKPTIVVSDYGSVWEVLVTKSSDFASRSMPYRSKFTTAGWRTLSTFDFSDAWFNLRKGAQSSFFHPANVSGQSPLQESDVEQLIRSIEEEANGNINGVVRPLPHIRKSVIRLIARLCFGPDFRDEKFVEAMDVMIEETILQTSLSVLGDIFLVLQHIPGFKKPFREIIKVKRRIEELIRPCIDRYSSSSSSKENNYYYYLQFLLSRGFPLEVVIFNIYEMFLLAVDSTSLTIAWALAFLIHEKQIQDKLYKELISREYGKEGGLRLEQVSKMKYLHGVVKESARLRPIAPLGIPHKAVKDTTLMGKRIEAGTTVMVNLYAVLH…
Aristolochia_fimbriata|Af03G220300.1		MVSWVCLMTLFLGSTLIFLLIFTTKRQKDAWPRGPRKLPIIGNLHQLQKGRRLVHINLAEMAKQYGKIMTVWFGTKPTIVVSDYVGSMPYSSRFTTAEWRTLSTFDFSDAWYNLRKGAQASFFNPASVLAQTPFQESDVEQLIGSIGKEAAENNGVVNPLRHIRRNVIRLIGRLCFGPDFRDEKFVEAMDVMIEDTVGQTGLKGLADLFPVLRHIPGFNPTYREIYKVKQRIEELISPCLDKYSSSSSSKENYNHYLQFLLSQGFPQEEVVIFNIFEMFLLAVDSTSLTIAWALGFLIHDQQIQGKLFEEVNGDRQYHEGILGMEQVSKMKYLQGVVKESARMRPIAPLGIPHKALNDTSLMGERIEAGTTVMVNLYAVLHDPAVWKEPDRFDPERFLE…
Aristolochia_fimbriata|Af03G220100.1		MDFSVGLMTLFLGSTFILLLIIFTTKRSQKHPWPPGPPKLPIIGNLHQLQKGGPLVHINLAEMAKQYGKTMTVWFGTKPTIFVSDYRSAWEVLVTKATDFGARSMPYKSRTISAEWRTISTCDYSEAWYNLRRGAQASFFSPANVLAQTSYQESDVEQLIRSIEEEAAENDGVVNPLPRIRKNVVRLIGRLCFGPDFRDEEFVETMDVIIEDTFSKPGLEDRLADLFPFLRHVPGFKQPFREAYKLKRRIEELISPCLDQYYSSSSSSKENYNHYLQFLLSQGFPQEVVIFSLFEMFLLAVDSTSLTIAWALAFLIHDQQIQDKLYKELIGVEYYGKEGALGMEQVSKMKYLQGVVKESTRMRPIAPLGIPHKALYDTSLMGERIEAGTTVMVNLYEVL…
Aristolochia_fimbriata|Af03G219700.1		MDGSLGVALGVTIFLGSTTLIIFLLIFSNRSKKHPWPPGPPKLPMIGNLHQLQKGGPLVHITLAEMAKQYGKIMTVWFGNKPTIVVSDYGSVWEVLVTKSSDFASRSMPYRSKFTTAGWRTLSTFDFSDAWFNLRKGAQCSFFHPANVSGQSPLQESDVEQLIRSIEEEANGNINGVVRPLPDIRKSVIRLIARLCFGPDFRDEKFVEAMDVMIEETILQTSLSVLGDIFPVLQHIPGFKKPFREIIKVKRRIEELIRPCIDRYSSSSSSKENNYYYYLQFLLSRGFPLEVVIFNIYEMFLLAVDSTSLTIAWALAFLIHEKQIQDKLYKELISREYGKEGGLRLEQVSKMKYLHGVVKESARLRPIAPLGIPHKAVKDTTLMGKRIEAGTTVMVNLYA…
Aristolochia_fimbriata|Af03G182100.1		MDISVGLLTLFLGSTFIFLLIIFTTKRSQKHPWPPGPPKLPIIGNLHQLQKGGPLVHINLAEMAKQYGQIMKIWFGTKPTIVVSDYKSVWEVLVTKSSDFASRSMPYKTRITSAEWRTISTSDYSDAWYNLRRGAQSSFFHPANVLAQTPFQESDVHKYLIRSIEKEAFENDGVVNPLPHIRKNVVRLIGRLCFGPHFRDEEFVESIDVIIEDTFKQPGLKDRLGDLFPYLRHVPGFKQPFREVYKMKQRIEELISPCLDQYCPPSSSSSSKENYNHYLHFLLSQGFPQEVVIFSLFEMFLLAVDSTSLTTAWALAFLIRDQQIQDKLFEELSRDGKEGALGLEQVRNMKYLQAVVKESARMRPIAPLAIPHKAVKETTLKGKRVDAGATVIVNLYAVL…
Piper_nigrum|Pn2.2352		MGMEMSIPWLVISSLLPLLFSFLIIRRRKKTTDWPPSPPTLPFLGNLHQLGHASSLHHNLAKLAGLHGRLMTIFAGSWQPTIVVSDGELAREVLVARSALFADRSLPPAGIPLSANYRTVGTSVPDTHWHAIRRGLQAGPFGPANLASQFKYQEEDVEGMIRSMEDEGKKNGGVVQPLDHIRRASLRLISRLCFGADFAEDELMEAIDKLVELVVKGSNFLSPTDVLPFADSIPYLSRSFKAVDAIKRQAEDILGPMLSHPAPPNSFLHVLRSHNQPDEVILMALFEIFVVGLDSTSVTSAWAMAFLVHHQDVQERLYEELVTFSNETKVVKATELSKLPYLQAVVKETMRMKPVAPLGVAHRATADATIWGRKVPKGTDVVVNIYAIHHDEKTWSEPG…
Piper_nigrum|Pn4.3099		MAHWVNPALFSAFVGIVSFFLGMFLRGRSLRNTSPTEWPDGPPKLPIIGNLHQLNKGRELVHHKLAKLAQTYGGVMTIWVGSWSPQIVVSDADLVWEVLVTKSPDFAGRHIPKILHLTNADNNTVASYDAGPQWQSLRRGLQHGPLGPASLSAQAHFHEEDMKRLASDMLRAAREGGNGVVEPLAHIRRASIRLLSRLCFGQDGCVNEAFVEGMNDAVEQTIRATGHGRIVDAFNFTRYLPIVRKCFIDTVDAKKKIESLIRPLISLPGPPGSYLHFLKSTDVPEHMTIYRIFELYLLGVDSTSNTTTWALAFLVANQDAQKKLHNELAQYCAAHNTQTLKAEDISKLPYLDGVVKETMRMRPIAPLAIHHKTLKETMLDGKRVAAGTTVIVNLYAVHY…
Piper_nigrum|Pn7.1626		MEQARWVDPALFSAIVGIIFFILGVFLRGRSWRSTSSTEWPVGPPKLPIIGNLHQLSEGGELTHHRLAKLAQTYGRTMTIWVGSWRPMIVVSDADLAWEVLVSKAADFAGRDMSKVSHLINAECNTVSTYDAGPNWQSLRRGLQHGPLGPAHLSAQAHFHEEDMKLMASEMVGAARKRGDGVVEPMAFIRRATIRFISRLCFGKNFNDEVFIEGLDNALDQTIRVTGHARIVDAFYFTRYLPIIRGPFIDTVTVKTEIENLIRPLLSGPAPTGSYLHFLLSTDVPENIIIFRIFELYLLGVDSSASTITWALAFLVSNQPAQEKLHGELSQYCATHNIETVKADDVGKLPYLLGVVKETMRMKPIAPLAVPHKTLNQTKLDGKRVAAGTVVVVNLYAIH…
Piper_nigrum|Pn3.4770	PnCYP719A37	MVACTHVRQQDSAHAWKTASVAEEDRGVARPQGLQRVMVVMGGEAEVAMARQCLPQGIVYGEAAIISMEQAQWVDPALFSAFVSIIFFFLGMFLGRISLGVGKGAAPRSPSSTEWPDGPPKLPIIGNLHQLNKGGELVHHKLAKLAQSYDRAMTIWVGSWGPMIVVSDADLAWEVLVTKSPDFAGRVLSKLSHLFNADYNTVVAYDAGPQWQSLRRGLQHGPLGPAHVSAQARFHEEDMKLLVSDMMRAAKKGGNNGVVEPLAYVRRATIRFLSRLCFGEAFNDEAFVEGMDEAVEETIRATGHARILDAFYFTRHLPIIRRSFMNTVAAKKKIESLVRPLLSRPAPPGSYLHFLLSTDAPESMIIFRIFEVYLLGVDSTASTTTWALAFLVSNQQAQE…
Papaver_armeniacum|Par_contig_474.14		MAPINIEENDVWMIACTVIIIFALVKFMFSFYQSANTTEWPEGPKTLPIIGNLHQLGGGVPLQVALANLAKVYGGAFTIWIGSWVPMIIISDIDNAREVLVNKSADYSARDVPDILKIITANGKNIADCDSGPFWHNLKKGLQSCINPSNVTSLSRLQEKDMQNLIKSMQERASQQNGILKPLDHAKEASIRLLSRVIFGQDFSNEDLVIGVKDALDEMVRISGLASLADAFKIAKYLPSQRKNIRDMYATRDRVYNLIQPHIVSNLPANSFLHFLTSQDYSDEIIYSMVLEIFGLGVDSTAATAVWALSFLVGEQEIQEKLYREINTLTGGQRPVKVVDLKELPYLQAVMKETLRMKPIAPLAVPHVAAKDTTFKGRRIVKGTKVMVNLYAIHHDPNV…
Papaver_armeniacum|Par_contig_1534.7		MDENFWFITAGTVIIVFALAKFLATKKSSPSAMEWPAGPKTLPIIGNLHQLGGDLFHVVLANLAKVHGGVFTIWIGSWNPVIIVSDVNSAREVLVSKSSDYSSRNVPDYLKIVSADGKSISESDCGPFWHGLRKGLQGVALNPLHVMSQSHLQERDMQNLIKSMQEDASKEDGVIQPLDYVKKEAIRLLCRIVFGQDFSNEDFVAAMNQTLYNLVRIGGFASLADAFKVGEYLPSHKKFIRELNAVSEAAANLVLPYVASKPPKNTYLHFLVSQEYGEDVIVSAILEIFSMAADSTAATIVWALAFLVREQDIQEKLYLADVKKMSYLQAVIKETLRMKTVGPMAIPHKTSKNTSLMGKKISKGTQVMVNLYAIHHNSDVFPEPYKFIPERFLKDVNSD…
Papaver_armeniacum|Par_contig_1650.4		MELPPGPRKLPIIGNLHQLNKGGELVHVTLAKLAQEHGKIMTVWFGGQQPSIVVSHHDAAWEVLVTKASDFSSRTLPYMSKFSSADWHTLATCNLGPFWQNLRKGLQTTTLNPHTFSAQVHLQEKDIANLILNFKEEASLNGGILKPMIPLRRTTIQLIGRFCFGVEFEDKDGFVENIDTVMEETIRLSGHARLVDVFEFTRYIPGFRLLFKEAYELKHKIEETIRPYIHRYKSSTNCFLQFLLSQEDYSEEVVIFNLFEQFLLSTDSTSNATSWALAYLIHNKKIQQKVYAEVQELTGCGHSREEMVTIEEVSKLKYVNAVVKEVLRMKPIAPLAVPHQAVCDSNLMGIKVRKGTPVMVNIYAVHYDPTVWAEPYKFMPERFLGALYDDGDKSKASPA…
Papaver_armeniacum|Par_contig_1956.2		MEETFWLITCGVLVAFASAKLLFGKKSSLSTMEWPAGPKKLPIIGNLHQLGGEAFHVCMANLAKVHGSVFTIWLGSWRPFIVINDVDKAWEVLVNKSSDYSARDMPDITKIISANWKNISHCDSGPFWHNLRKGLQSVALTPFNVASQYHLQERDMQNLIKSIQEKTSHQNGTLKPLDYVKEETVRLLSRLIFGQDLVDEDFVVGMHQALDEYIETISKASLADVFKFCENLSSHKKTIRAVHAIKKRIDSLIRPHIVSKPPTNTYLHFLLSQDFSEDVIISAIHEVYDLGVDATSLTTVWALTFLVREQKIQEKLYREIQNVTGGERPVKVEDVNKLPYLQAVMKETMRMKPIAPTAIPHKALKDTSLMGKKINKGTVVIVNLYAIHHNPDVFPEPYK…
Papaver_armeniacum|Par_contig_2017.24		MENICLITASTVIIIFALAKFLASKISSPSATKWPAGPKTLPIIGNLHQLGGDLFHVVLAKLAKVHGGVFTIWVGSWNPVIIVSDINSAREVLISKSSDFSSRNVPDYLKIVSADGKSISESDCGPFWHGLRKGLQGVALNPLHVMSQSHLQERDMQNLIKSMQEDASKEDGLIQPLDYVKKDAIRLLSRIVFGQDFSNEDFVAAMNHTLHNLVRIGGFASLADAFKVGEYLPSHKKFIRELNAVSEEAANLILPYIASKPSKNTYLHFLVSQEYSEDVIVSAVLEIFSMAADSTAATTVWALAYLVREQDIQEKLYREIKNVTAVIKETLRMKTVGPMAIPHKASKNTSLMGMKVDKGTQVMVNLYAIHHNSDVFPKPYKFMPERFLKDVNSDASLGD…
Papaver_armeniacum|Par_contig_2204.4		MVWPTGPKTLPIIGNMHVLGGTALQVVLHNLAKIHGNVMTIWIGSWRPVIVVSDIDRAWEVLVNKSSDYSARDMPEITKIISADWKTISTSDSGPGWSNLRKGLQNVALSPHNLAAQSQFQEKDITKMIQSLKKEAASNNGIVKPIDHLKKATLRLISRLIFGQDFDDDKYVDDMHHAIEELIRVSGYAQLAEAFYYAKYLPSHKKAVRDVEEANQRVKKLVRPFLSLNPPTNTYLHFLNSQKYDEEVIIFAIFEAYLLGVDSTSLTTAWALAFLIREPVVQDKLYQEIKDFTVKNDREIVKVEDLNKLQYLQAVLKETMRMKPIAPLAIPHKACRDTSLMGKKIDQGTRVMVNIYALHHNEKVWKEPFKFMPERFLQTQDVVNGKAMEQSLLPFSAGM…
Papaver_armeniacum|Par_contig_2647.1		MTPINIEENDFWMIACTVIIIFALVKFMFSFYQSSNTTEWPEGPKTLPIIGNLHQLGGGVPLQVALANLAKVYGGAFTIWIGSWVPMIIISDIDNAREVLVNKSADYSARDVPDILKIITANGKNIADCDSGPFWHNLKKGLQSCINPSNVTSLSRLQEKDMQNLIKSMQERASQQNGILKPLDHAKEASIRLLSRVIFGQDFSNEDLVIGVKDALYEMVRISGLASLADAFKIAKYLPSQRKNIRDMYATRDRVYNLIQPHIVSNLPANSFLHFLTSQDYSDEIIYSMVLEIFGLGVDSTAATAVWALSFLVGEQEIQEKLYREINTLTGGQRPVKVVDLKELPYLQAVMKETLRMKPIAPLAVPHVAAKDTTFKGRRIVKGTKVMVNLYAIHHDLTF…
Papaver_armeniacum|Par_contig_4132.3		MTNLLCFLFLKHESNLCVLTVTSTILAIFAVLMIFRRRKSTSTMEWPVGPKTLPIIGNMHILGGTTLHVVLHKLAEVYGGVMTIWIGSWKPVIIVSDFDRAWEVLVNKSSDYSARESPEITKIGSANWRTISTSDSGPFWATLRKGLQSVALSPQNLASQTALQERDVRKLIENLKEEAALNNGIVKPLDHLKKATVRLISRLIYGQDFDGDKYVEDMHDVIDVMIRISGYAKLADVFSWAKYLPAHRRAVTGFEEARRRIIVLVRPFLVSKPPTNTYLHFLKSQNYPEEVIIFAIFEAYLLGVDSTSSTTAWALAFLIRQPSVQDKLYQELKIFAANNNCTMLKTEDVNKLPYLQAVGKETMRMKPIAPLAIPHKACKDTSLMGNRVDKGTRVMINIH…
Papaver_armeniacum|Par_contig_4839.13		MTHFPFTIWIGSWSPVIIVSDVNSAREVLVTKSSDYSARNVPDYLKIVSADGESIADSDTGPFWHNLRKGLQNVALNPMSVMSQSHLQERDMQKLIKSMQENASRENGILKPLDYVKKETIRFISRIVFGQDFSNEDFVAAMSQTVHNLVRIGGFASLADAFKVGECLPSHKKFIRELNSISAHAANLILPYIGSKPPVNTYLHFLTSQDYSEDVIISAILEIYGLAADSCATTIVWALTFLVREQEIQEKLYCEIKDIIGRTRSVKIADLKKMSYLQAVVKETLRMKCVGPMAIPHKATRNTSLMGKKIDKGTQVMVNLYAIHHNSDNFLEPYKFVPERFLKDVNSDASLGDQKKMESSLLAFGAGMRVCAGMDIAKLIVSFSIASLVNEFKWDCVSD…
Papaver_armeniacum|Par_contig_5466.2		MDENVMCILAGTVIIVLALQKLLVSKNSSFSATEWPAGPTALPIIGNLHQLGGDLFHVVLAKLGKVHGDVFTIWIGSWNPVIIVSDINSAREVLVTKSSDYSARSVPDYLKIVSAGGESIADSDSGPFWHSLRKGLQNFALNPLNVMSQSHLQERDMQNLIISMREDASRENGIIKPFDYVRKEAVRLLSRIVFGQDFSNEDFVAAMSDTVHNLVRTGGFASLADAFKIGEYLPSHKKFINDLNDVSERAANLILPYIEQKAPTNTYLHFLTSQDHSEVIIVSAILELYGLAADSTAATIVWALKFLVRQQEIQEKLYREIRDVTGGTRPVKIADLKKMPYLQALVKETVRMKPIGPMAIPHKATKNTSLMGKKIDKGTQVMVNIYAIHHNSDVFPEPY…
Papaver_armeniacum|Par_contig_5466.26		MAPIQIEENNFLMIACTAIVALSFVKFLFSKISSQSANTMEWPQGPRKLPIIGNLHQLGGDVPFQVVLANLAKVYGGVFTIWVGSWVPMIIISNVEYAWEVLVTKGSDYSARDVPEILKIVTANGKNIADCDSNPFWHNLKRGLQSVALNPVNLMSLSHIQEKDMQNLIKSMQEGASQNNGILKPLDYLKEESIRLLSRLLFDQNFSDENFVIGMKHTLSDLVRISGFASLIDAFKIAKYLPSQRKCFREMYAVKENAQNLIRPYIVSTPPADTFLHFLTSQDYSEEIVVSAILEVYGLGVDSTASTAVWALAFLVHEQEIQEKLYREINSLTGGKRSVKVADLKSLPYLQAVMKETLRMKPIAPLALPHKASKDTTLMGRRIDKGTKVMVNLYAILHD…
Papaver_armeniacum|Par_contig_6351.4		MDLPPGPRKLPIIGNLHQLNKSGELVHVTLAKMAQEHGKIMTVWFGGQQPSIVVSHHEVAWEVLVTKASDWHTLATCNLGPFWQNLRKGLQTTTLNPHTFAAQVHLQEKDIANLILDFKEEASLNGGIVKPMVPLRRTTIQLIGRFCFGVEFEDKDGFVENIDTVMEETIRLSGHARLVDVFEFTRYMPGFRLLFKEAYELKRKIEETIRPYIHRYKSSTNCFLQFLLSQEDYSEEVVIFNLFEQFLLSTDSTSNATSWALAYLIHNEKIQEKVYAEVQELTGCGQPREEMVTIEEVSKLKYVNAVVKEVLRMKPIAPLTLANLVNTFRWSCVSGGKFPDLTEDLSFILRMKTPLVAGIVPR*
Papaver_armeniacum|Par_contig_7045.45		MDGNSLLTIAGTVIIVLAFAKFLALRKSYPTGTEWPAGPKTLPLIGNLHQLWGDLFHVALANIAKVHGGVFTIWLGSWNPVIIVSDVNSAREVLLTKSFDYSARNYPDYLTVLSEGNDSINGSDCGPFWHNLRKGLTSGALNPLNVTSQSHLQERDMQNLIKSMQETASRENGILRPLDYVKKEAIRLLSRTIFGQDFSNDEDFVVGIHHTVHHLISIGGFANLADAFKIGEYVPRHIRYIRGLNQVGEQAAKLILPHIVASKPPPNSYLHFLKSQGFSDDVIVSLIIEVYGFATDSIASTIVWALTYLVREQKIQEKLYREIKDVTGGTRPVKIADLNKMPYLKAVVKETIRMKPLGPMAIAHKATKNTSLMGRKIDKGTPVMVNIYAIQHNSKVFPE…
Papaver_armeniacum|Par_contig_7079.5		MAPIQIEENNFLMIACTAIVALSFVKFLFSKISSQSANTMEWPQGPRKLPIIGNLHQLGGDVPFQVVLANLAKVYGGVFTIWVGSWVPMIIISNVEYAWEVLVTKGSDYSARDVPEILKIVTANGKNIADCDSNPFWHNLKRGLQSVALNPVNLMSLSHIQEKDMQNLIKSMQEGASQNNGILKPLDYLKEESIRLLSRLLFDQDFSDENFVIGMKHTLSDLVRISGFASLIDAFKIAKYLPSQRKCFREMYAVKENAQNLIRPYIVSTPPADTFLHFLTSQDYSEEIVVSAILEVYGLGVDSTASTAVWALAFLVHEQEIQEKLYREINSLTGGKRPVKVADLKSLPYLQAVMKETLRMKPIAPLALPHKASKDTTLMGRRIDKGTKVMVNLYAILHD…
Papaver_armeniacum|Par_contig_7553.21		MNENVLFITASTVIIVLALAKFLASRKSSTSTTEWPAGPKTLPIIGNLHQLGGDVLHVVLANLAKVHGGVFTIWIGNWNPVIIVSDVHSAREVLITKSSDYSGRVVPDYIKLISADGENISDSDSGPFWHNLRKGLQGVALNPLSVMSQSHLQERDMQNLIQSMQENASRENGIVKPLDYVKKDAIRLVSRIMFGHEFSNEEFVAAMSHTLHDFVRTGEFARLADAFKIATYLPSHKKTVRKMNAVGAQGANLILPCMASKPPSNTYLHFLLSQGYSQDVIVSAILEIYGLAADSIAETIVWALTFLVRQQEVQEKLYREIKNVTGGTRPVKIADLKQMSYLEAVVKETLRMKCIGPLAIAHKATKDTSLMGKKISKGTPVMVNIYAIHHNSDVFPEPY…
Papaver_armeniacum|Par_contig_7931.2		MEGTFWLITCGVVVAFALAKLLFGKKSSLSTMEWPAGPKTLPILGNLHQLGGEAFHVCLANLAKVYGGVFTIWVGSWRPFIVISDVDKAWEVLVNKSSDYSARDMPDITKIISANWKNISHGDSGPFWHNLRKGLQGVALTPFNVASQYHLQERDMQNLIKSMKEKASQKNGILKPLDYVKEETVRLLSRLIFGQEFVDEDFVVGMHQALDELVSISGYASLADAFKFCENLPSHKKTIRAVHAIKIRFDNLIRPHIVSNPPTNTYLHFLLSQDFSEDVIISAILEVYDLGVDSTASTTVWALTFLVREQKIQEKLYREINNVTGGKRPVKVEDLNKLPYLQAVMKETMRMKPIAPMAIPHKASKDTSLMGKNVNKGTVVMVNLYAIHHNPAVFPEPYK…
Papaver_armeniacum|Par_contig_8294.80		MNENFLFITATTVIIVLALAKFLASRKSSTSTTEWPAGPKTLPIIGNLHQLGGDVLHVVLANLAKVHGGVFTIWIGNWNPVIIVSDVHSAREVLITKSSDYSGRVVPDYIKLISADGENISDSDSGPFWHNLRKGLQGVALNPLSVMSQSHLQERDMQNLIQSMQENASRENGIVKPLNYVKKDAIRLVSRIMFGHEFSNEEFVAAMSHTLHDFVRTGEFARLADAFKIATYLPSHKKTVRKMNDVGAQGANLILPYMASKPPSNTYLHFLMSQGYSEDVTVSAILEIYGLAADSIAETIVWALTFLVRQQEVQEKLYREIKNVTGGTRPVKIADLKQMSYLEAVVKETLRMKCIGPLAIAHKATKNTSLMGKKIGKGTPVMVNIYAIHHNSDVFPEPY…
Papaver_armeniacum|Par_contig_11637.18		MIMSNLWILTLISTILAVFAAVLIIFRRRISASTTQWPVGPKTLPIIGNLHILGGTALHVVLHKLAEVYGSVMTIWIGSWKPVIIVSDFDRAWEVLVNKSSDYSAREMPEITKIGTANWRTISSSDSGPFWATLRKGLQGVALSPQHLASQTAHQERDIIKLIKNLKDEAALNSGMVKPLDHLKKATVRLISRLIYGQDFDDDKYVEDMHDVIEFLIRISGYAQLAEVFYYAKYLPSHKRAVTGAEEAKRRVIALVRPFLQSNPATNTYLHFLKSQQYPEEVIIFAIFEAYLLGVDSTSSTTAWALAFLIREPSVQEKLYQELKNFTANNDRTMLKVEDVNKLPYLQAVVKETMRMKPIAPLAIPHKACKDTSLMGKKVDKGTKVMVNIHALHHTEKVW…
Papaver_armeniacum|Par_contig_12219.3		MDENILFIIAATVIILALTTFILVSRKSSPSAMEWPAGPKALPIIGNLHQLGGDLFHVVLANFAKVHGGIFTIWIGSWSPVIIISDVNSAREVLVTKSSDYSARNVPDYLKIVSADGESIADSDTGPFWHNLRKGLQNVALNPMSVMSQSHLQERDMQKLIKSMQENASRENGILKPLDYVKKETIQFISRIVFGQDFSNEDFVVAMSQTVHNLVRIGGFARLADAFKVGEYLPSHKKFIRELNSISAHAANLILPYIGSKPHVNTYLHFLTSQDYSEDVIISAILEIYGLAADSCATTIVWALTFLVREQEIQEKLYCEIKDIIGRTRAVKIADLKKMSYLQAVVKETLRMKCVGPMAIPHKATRNTSLMGKKIDKGTQVMVNLYAIHHNSDNFLEPY…
Papaver_armeniacum|Par_contig_12825.37		MDENFWFITAGTVIIVFALAKFLATKKSSPSAMEWPAGPKTRPIIGNLHQLGGDLFHVVLANLAKVHGGVFTIWIGSWNPVIIVSDVNSAREVLVSKSSDYSSRNVPDYLKIVSADGKSISESDCGPFWHGLRKGLQGVALNPLHVMSQSHLQERDMQNLIKSMQEQASQEDGVIKPLDYVKKEAIRLLSRIVFGQEFSNEDFVFAMNQTLHNLVRIGGFASLADAFKVGEYLPSHRKFIRELNAVSEAAANLVLPYIASKPPKNTYLHFLVSQEYGEDVIVSAILEIFSMAADSTAATIVWALAFLVREKEIQEKLYREIKNVTGGNRPVQVADVKKMSYLQAVIKETFRMKTVGPMAIPHKTSKNTSLMGKKISKGTQVMVNLYAIHHNSDVFPEPY…
Papaver_armeniacum|Par_contig_12825.45		MENICIITASTVIIIFALAKFLASKIPSPSAMKWPAGPKTLPIIGNLHQLGGDLFHVVLAKLAKVHGGVFTIWVGSWNPVIIVSDINSAREVLISKSSDFSSRNVPDYLKIVSADGKSISESDCGPFWHGLRKGLQGVALNPLHVMSQSHLQERDMQNLLKSMQEDASKEDGVIQPLDYVKKDAIRLLSRIVFGQDFSNEDFVAAMNHTLHNLVRIGGFASLADAFKVGEYLPSHKKFIRELNAVSEEAANLILPYIASKPSKNTYLHFLVSQEYSEDVIVSAVLEIFSMAADSTAATTVWALAFLVRQQDIQEKLYREIKNVTGGNRPLQVADVKKMSYLQAVIKETLRMKTVGPMAIPHKASKNTSLMGMKVDKGTQVMVNLYAIHHNSDVFPKPYK…
Papaver_armeniacum|Par_contig_13009.1		MVWPTGPKTLPIIGNMHVLGGTALQVVLHNLAKIHGNVMTIWIGSWRPVIVVSDIDRAWEVLVNKSSDYSARDMPEITKIISADWKTISTSDSGPAWSNLRKGLQNVALSPHNLAAQSQFQEKDITKMIQSLKKEAASNNGIVKPIDHLKKATLRLISRLIFGQDFDDDKYVDDMHHAIEELIRVSGYAQLAEAFYYAKYLPSHKKAVRDVEEANQRVKKLVRPFLSLNPPTNTYLHFLNSQKYDEEVTIFAIFEAYLLGVDSTSLTTAWALAFLIREPVVQDKLYQELKDFTVKNDREIVKVEDLNKLQYLQAVLKETMRMKPIAPLAIPHKACRDTSLKGNKIDQGTRVMVNIYALHHNEKVWKEPFKFMPERFLQTQDVVNGKAMEQSLLPFSAGM…
Papaver_armeniacum|Par_contig_14138.3		MDGNSLLTIAGTVIIVLAFAKFLALRKSYPPGTEWPAGPKTLPLIGNLHQLWGDLFHVALANLAKVHGGVFTIWLGSWNPVIIVSDVNSAREVLLTKSFDYSARNYPDYLTVLSEGNDSINGSDCGPFWHNLRKGLTSGALNPLNVTSQSHLQERDMQNLIKSMQENASRENGILRPLDYVKKEAIRLLSRTIFGQDFSNDEDFVVGIHHTVHHLISIGGFANLADAFKIGEYVPRHIRYIRGLNDVGEQAAKLILPHIVAAKPPTNSYLHFLKSQDFSDDVIVSLIIEVYGFATDSIASTIVWALTYLDVTGGTRPVKIADLNKMSYLKAVVKETIRMKPLGPMAIAHKATKNTSLMGRKIDKGTPVMVNIYAIQHNSKVFPEPYKFLPERFLNDVNS…
Papaver_armeniacum|Par_contig_15371.2		MEGTFWLITCGVVVAFALAKLLFGKKSSLSTMEWPAGPKTLPILGNLHQLGGEAFHVCLANLAKVYGGVFTIWVGSWRPFIVISDVDKAWEVLVNKSSDYSARDMPDITKIISANWKNISHGDSGPFWHNLRKGLQGVALTPFNVASQYHLQERDMQNLIKSMKQKASQKNGILKPLDYVKEETVRLLSRLIFGQEFVDEDFVVGMHQALDELVSISGYASLADAFKFCENLPSHKKTIRAVHAIKIRFDNLIRPHIVSNPPTNTYLHFLLSQDFTEDVIISAILEVYDLGVDSTASTTVWALTFLVREQKIQEKLYREINNVTGGKRPVKVEDLNKLPYLQAVMKETMRMKPIAPMAIPHKASKDTSLMGKKVNKGTVVMVNLYAIHHNPAVFPEPYK…
Papaver_armeniacum|Par_contig_15690.6		MQEIMSDSWILTSTVFAFFAVLMIFRRRKSASRMEWPVGPRTLPIVGNLHILGGTARHVVLQKLAQVYGGNVMTIWIGSWKPVIVVSDFDGAWEVLVNKSSDYSAREMPEITKLGTANWRTILSSDSGPFWATLKKGLQSVALSPQNLASQTALQESDIRKLIENLKVEAALDNGIVRPLDHLKKATVRLISRLIYGKDFDDDKYVQDMHNEIEFLSRLKGHARLAEVFYYAKYLPSHKKAVRGAEEAKRRVTELVRPFLASNPPTNTYLHFLKSQNYPEDVIIFAIYEAYLLGVDSTSSTTTWALAFLIREPSVQEKLHQELKKCTADNNRTMLKVEDINKLPYLHAVLKETMRMKPIAPLAMPHKACKDTSLMGKKVDKGTKVIVNIHALHHTAKVW…
Papaver_armeniacum|Par_contig_17205.8		MAPIKEGINDFWVIACTVIVTFALVKFLFSKISSQSANTTEWPAGPRKLPIIGNLHQLRGGGQPFQVVLANLAKVYGGAFTVWVGSWSPTIIVSDADHAREVLINKSSDYSARDVPDRLKIVTANGKNISDSDAGPYWHNLKKGLQSVALNPPNVMSLSYSQEKDMHKMIKSMQEKASQKNGILKPLDYVKEDSIRLLSRLVFGQDFSNEDYVIDMKHTLDELVRISGFASLADAFKYAEYLPSHRKSVQDMYAIKERVHNLIQPHMVSNPPANSYLHFLASQDYSEEIIVSAILEVYGLGVDSTASTAVWALSFLVCDQKIQEKLYCEINNLTGGKRPVKVADLKKLPYLQSVMKETFRMKPIAPMAIPHKATKDTTLMGRKINKGTTVMVNLYAIHH…
Papaver_armeniacum|Par_contig_18550.4		MIMSNLWILTLISTILAVFAAVLIIFRRRISASTTEWPVGPKTLPIIGNLHILGGTALHVVLHKLAEVYGSVMTIWIGSWKPVIIVSDFDRAWEVLVNKSSDYSAREMPEITKIGTANWRTISSSDSGPFWATLRKGLQGVALSPQHLASQTAHQERDIIKLIKNLKDEAALNSGMVKPLDHLKKATVRLISRLIYGQDFDDDKYVEDMHDVIEFLIRISGYAQLAEVFYYAKYLPSHKRAVTGAEEAKRRVIALVRPFLLSSPPINTYLHFLKSQNYPEEVIIFAIFEVYLLGVDSTSSTTAWALAFLIREPSVQEKLYQELKNFSANNNRTMLKVEDVNKLPYLQAVVKETMRMKPIAPLAIPHKACKDTSLMGKKVDKGTKVMVNIHALHHTEKVW…
Papaver_armeniacum|Par_contig_19393.10		MEWPAGPKTFPILGNLHQLGGEAFHVCLANLAKVYGGVFTIWVGSWRPFIVISDSARDMPDITKIISANWKNISHGDSGVALTPFNVASQYHLQERDMQNLIKSMKKKEETVRLLSRLIFGQEFVDEDFVVGMHQALDELVSISGYASLADAFKFYENLPSHKKTIRAVHAIKNSIDNLIRPHIVSNPPTNTYLHFLLSQDFSEDVIISAILEVYDLGVDSTASTTVWALTFLVREQKIQEKLYREINNVTGGKRPVKVEDLNKLPYLQAVMKETMRMKPIAPMAIPHKASKDTSLMGKKVNKGTVVMVNLYAIHHNPAVFPELYKFMPEKFLKDANGDGSLGDIKKMESSLLAFSAGMRICAGMELGKLQLAFGLASLVNEFKWDCVADGKLPDLSEE…
Papaver_atlanticum|Pat_contig_1477.96		MDENILFIIAGTVIILALATFIPVSRKSSPSAMEWPAGPKTLPIIGNLHQLGGDLFHVVLANFAKVHGGVFTIWIGSWSPVIIVSDINSAREVLVTKSSDYSARNVPDYLKIVSADGESIADSDSGPFWHNLRKGLQNVALNPMSVMSQSHLQERDMQKLIKSMQENASRENGILKPLDYVKKEIVRSISRIIFGPDFSNEDFVVAMSQTVHNLVRIGGFASLADAFKVGEYLPSHKRFIRELNSISAHAANLIFPYIASKPPVNTYLHFLTSQEYSEDVIISAILEIYGLAADSCASTIVWGLTFLVREQEIQEKLYCEIKNTTGGTRPVKNADLKKMPYLQAVVKETLRMKCVGPMAIPHKAARNTSLMGKKIDKGTQVMVNLYAIHHNSEVFLEPY…
Papaver_atlanticum|Pat_contig_6109.1		MEKTIFSNSWILTTSTLVVITIITMLMVYKRKKSSTMVWPTGPKTLPIIGNMHVLGGTALQVVLHNLAKIHGNVMTIWIGSWRPVIVVSDIDRAWEVLVNKSSDYSARDMPEITKIISADWKTISTSDSGPGWSNLRKGLQNVALSPHNLAAQSQFQEKDITKMIQSLKKEAASNNGIVKPIDHLKKATLRVISRLIFGQDFDDDKYVDDMHHAIEELIRVSGYAQLAEAFYYAKYLPSHKKAVRDVEEANKRVKKLVRPFLSLNPPTNTYLHFLNSQKYDEEVIIFAIFEAYLLGVDSTSLTTAWALAFLIREPVVQDKLYQELKDFTVKNDREIVKVEDLNKLQYLQAVLKETMRMKPIAPLAIPHKACRDTSLMGKKIDQGTRVMVNIYALHHNEK…
Papaver_atlanticum|Pat_contig_7821.1		MENICLITASTVLTIFALAKFLASKISSPSAMKWPAGPKTLPIIGNLHQLGGDLFHVVLANLAKVHGGVFTIWMGSWNPVIIVSDVNSAREVLISRSSDFSSRNVPDYLKIVSADGKSISESDCGPFWHGLRKGLQGVALNPLHVMSQSHLQERDMQNLIKSMQEDASKVDGVIQPLDYVKKEAIRLLSRIVFGQDFSNEDFVAAMNQTLHKLVRIGGFASLADAFKVGEYLPSHKKFIHELNAVSEEAANLILPYIASKPSKNTYLHFLVSQEYSEDVIVSAVLEIFSMAADSTAATTVWALAFLVREQDIQEKLYHEIKNVTGGNRPLQVADVKKMSYLQAVIKETLRMKTVGPMAIPHKASKDTSLMGRKIDKGTQVMVNLYAIHHNSDVFPEPYK…
Papaver_atlanticum|Pat_contig_9912.1		MDGNSLFIIASTVVIVLAIAKFLALRKSYPTGTEWPAGPKTLPLIGNLHQLWGDLFHVVLANLAKVHGGVFTIWLGSWNPVIIVSDVNSAREVLLTRSSDYSARNYPGYLTVLSEGNDSINGSDCGPFWHNLRKGLTSGALNPLYVTSQSHLQERDMQNLIKSMQENASRENGVIKPLDYVKKEAIRLLNRTIFGQDFSNDEDFIVGIHHTVHHLISIGGFANLADAFKIGEYVPRHRRYIRGLYDVGEQAAKLILPHIASKPPTNSYLHFLKSQDFSEDVTVSLILEVFGFATDSIASTIVWALTFLVREQKIQEKLYCEIKEVTGGTRPVKIADLNKMSYLKAVVKETIRMKPLGPMAIAHKATKNTSLMGRKIDKGTPVMVNIYAIQHNSEVFPEP…
Papaver_atlanticum|Pat_contig_10038.82		MELPPGPRKLPIIGNLHQLNKGGELVHVTLAKLAQEHGKIMTVWFGGQQPSIVVSHHEAAWEVLVTKASDFSSRTLPYMSTFSSADWHTLATCNLGPFWQNLRKGLQTTTLNPHTFSAQVHLQQKDIANLILNLKEEASLNGGIVKPMVPLRRTTIQLIGRFCFGVEFEDKDEFVENIDTVMEETIRLSGHARLVDVFEFTRYIPGFRLLFKEAYELKHKIEETIRPYIHRYKSSTNCFLQFLLSQEDYSEEVVIFNLFEQFLLSTDSTSNATSWALAYLIHNEKIQEKVYAEVQESAGCGHSREEMVTVEEVSKLKYVNEVVKEVLRMKPIAPLAVPHQAVCDSTLMGMKVHKGTPVMVNIYAVHYDPTVWVEPQRFMPERFLSGMSDAGDKSKADAA…
Papaver_atlanticum|Pat_contig_15713.80		MKEMFSSSLVLITSTTMVVITTITMLLIFARKKSSTMEWPTGPKTLPIIGNMHILGGTALQVVLHNLAKIHGNVMTIWIGSWRPVIVVSDIERAWEVLVNKSSDYSARDMPEITKIISADWKTISTSDSGPAWSNLRKGLQNVALSPHNLAAQSQFQEKDITKMIQSLKKEASSNNGIVKPIDHLKKATLRLISRLIFGQDFDNDKYVDDMHHAIEELIRVSGYAQLAEAFYYAKYLPSHKKAVRDVEEANQRVKKLVRPFLSLNPPTNTYLHFLNSQNYAEEVIVFAIFEAYLLGVDSTSLTTAWALAFLIREPVVQDKLYQELKTFAAKNDREIVKVEDLNKFQYLQAVLKETMRMKPIAPLAIPHKACRDTSLKGNKIDQGTRVMVNIYALHHNEK…
Papaver_atlanticum|Pat_contig_16160.238		MEETFWLVTCGVVVAFVLAKLLFGGKSSLSTMEWPAGPKKLPIIGNLHQLGGEAFHVCLANLAKLHGSVFTVWVGSWRPFIVISDVDKAWEVLVNKSSDYSARDMPDITKIISANWKNISHSDSGPFWHNLRKGLQTVALTPFNVASQYHLQERDMQNLIKSMQEKASQKNGILKPLDYVKEETVRLLSRLIFGQEFVDEDFVVGMHQALDELVSISGYASLADAFKFCENLPSHKKTIQAVHAIKKRFDSFIRPHIVSKPPTNTYVHFLLSQDFSEDVIISAILEVYDLGVDSTASTTVWTLTFLVREQKIQEKLYCEIKNVTGGKRPVKVEDLNKLPYLQAVMKETMRMKPIAPMAIPHKASKDTSLMGKNINKGTVVMINLYAIHHNPDVFPEPYK…
Papaver_atlanticum|Pat_contig_16160.239		MEWPTGPKTLPIIGNMHILGGTGLQVVLHNLAKIHGNVMTIWIGSWRPVIVVSDIERAWEVLVNKSSDYSARDMPEITRIISADWKTISTSDSGPAWSSLRKGLQNVALSPHNLAAQSQFQEKDITKMIQSLEEEAASNNGIVKPIDHLKKATLRLISRLIFGQDFDNDKYVNDMHHVIEELIRVSGYAQLAEAFYYAKYLPSHKKAVRDVEEANQIVKKLVRPFLSLNPPTNTYLHFLNSQNYAEEVIIFAIFEAYLLGVDSTSLTTAWALAFLIREPVVQDKLYQELKNFTVKNDREIVKVEDLNKLQYLQAVLKETMRMKPIAPLAIPHKACRDTSLKGSKIDQGTRVMVNIYALHHNEKVWKEPYKFMPERFLQTQDVVNGKPMEQSLLPFSAGM…
Papaver_atlanticum|Pat_contig_16795.1		MENICLITASTVLTIFALAKFLASKISSPSAMKWPAGPKTLPIIGNLHQLGGDLFHVVLANLAKVHGGVFTIWMGSWNPVIIVSDVNSAREVLISRSSDFSSRNVPDYLKIVSADGKSISESDCGPFWHGLRKGLQGVALNPLHVMSQSHLQERDMQNLIKSMQEDASKVDGVIQPLDYVKKEAIRLLSRIVFGQDFSNEDFVAAMNQTLHKLVRIGGFASLADAFKVGEYLPSHKKFIHELNAVSEEAANLILPYIASKPSKNTYLHFLVSQEYSEDVIVSAVLEIFSMAADSTAATTVWALAFLVREQDIQEKLYHEIKNVTGGNRPLQVADVKKMSYLQAVIKETLRMKTVGPMAIPHKASKDTSLMGRKIDKGTQVMVNLYAIHHNSDVFPEPYK…
Papaver_atlanticum|Pat_contig_20166.93		MEETIWLITCGVVVALAFAKMLFGKKSSLSTTEWPTGPKKLPIIGNLHQLGGGEAFHVCLANLAKVHGSVFTIWVGSWRPFIVISDVDKAWEILVNKSSDYSARDMPDITKIISANWKNISHCDSGPFWHNLRKGLQSVALTPFNVASQYHLQERDMQKLIKSMQEKASLQNGILKPLDYVKEETVRLLSRLIFGQDFVDEDFVVGMHQALDELVSISGYASLADAFKFCENLPSHKKTIQAVHAIKKRFDTFIRPHIVSKPPTNTYLHFLLSQDFSEDVIISAILEVYDLGVDSTASTTVWALTFLVRDQKIQEKLYREIKSVTEGKRPVKVEDLNKLPYLQAVMKETMRMKPIAPMAIPHKASKDTSLVGKKINKGTVVMVNLYAIHHNPDVFPEPY…
Papaver_atlanticum|Pat_contig_20166.126		MEETIWLITCGVVVALAFAKMLFGKKSSLSTMEWPTGPKKLPIIGNLHQLGGGEAFHVCLTNLAKVHGSVFTIWVGSWRPFIVISDVDKAWEILVNKSSDYSARDMPDITKIISANWKNISHCDSGPFWHNLRKGLQSVALTPFNVASQYHLQERDMQKLIKSMQEKASLQNGILKPLDYVKEETVRLLSRLIFGQDFVDEDFVVGMHQALDELVSISGYASLADAFKFCENLPSHKKTIQAVHAIKKRFDTFIRPHIVSKPPTNTYLHFLLSQDFSEDVIISAILEVYDLGVDSTASTTVWALTFLVRDQKIQEKLYREIKSVTEGKRPVKVEDLNKLPYLQAVMKETMRMKPIAPMAIPHKASKDTSLVGKKINKGTVVMVNLYAIHHNPDVFPEPY…
Papaver_atlanticum|Pat_contig_20166.132		MKEMFSSSLVLITSTTMVVITTITMLLIFARKKSSTMEWPTGPKTLPIIGNMHILGGTALQVVLHNLAKIHGNVMTIWIGSWRPVIVVSDIERAWEVLVNKSSDYSARDMPEITKIISADWKTISTSDSGPAWSNLRKGLQNVALSPHNLAAQSQFQEKDITKMIQSLKKEASSNNGIVKPIDHLKKATLRLISRLIFGQDFDNDKYVDDMHHAIEELIRVSGYAQLAEAFYYAKYLPSHKKAVRDVEEANQRVKKLVRPFLSLNPPTNTYLHFLNSQNYAEEVIVFAIFEAYLLGVDSTSLTTAWALAFLIREPVVQDKLYQELKTFAAKNDREIVKVEDLNKFQYLQAVLKETMRMKPIAPLAIPHKACRDTSLKGNKIDQGTRVMVNIYALHHNEK…
Papaver_atlanticum|Pat_contig_21747.15		MMSNPWIPTIASIILAIFAVLMIFRRRKSSSAMEWPVGPKTLPIVGNLHLHSLGGAAALHVVLHKLAQVYGSCHFLYLQWIGSWKPVIVVSDFDQAWEVLVDKSSDYSAREMPEITKIVTTNWRTIINSDTGPFWATLYIRKLIEFLKVEAALNSGIVHPLDPLKKATVRLISRLIYRKDFNDGKYVKSMHDEIEFLTHFGSYPQLTDVFYYAKYLPKSKRRIIALVRPFLESNPPTNTYLHFLKSQNYPEDVIVFAIYESYLLGVDSTSTATTWAFAFLMREPSVQEKLYQELKNFTADNNRTILKVEDVNKLPYLQAAVKETMRMKPIAPLALPHKACKDTSLMGKKVEKGTNIMVNIHALHHTEKVWTEPYRSMPERFLQKQDKAMEQSLLPFSAG…
Papaver_atlanticum|Pat_contig_21747.16		MEETFWLITCGVVVAFALAKLLFGKKSSLSTMEWPAGPKTLPIIGNLHQLGGEAFHVCLANLAKVYGGVFTIWVGSWRPFIVISDVDKAWEVLVNKSSDYSARDMPDITKIISANWKNISHGDSGPFWHNLRKGLQGVALTPFNVAAQHHLQERDMQNLIKSMKEKASQKNGILKPLDYVKEETVRLLSRLIFGQEFVDDDFVVGMHQALDELVSISGYASLADAFKFCENLPSHKKTIRAVHAIKIRFDNLIRPHIVSNPPTNTYLHFLLSQNFSEDVIISAILEVYDLGVDSTASTTVWALTFLVREQKIQEKLYREINNVTGGKRPVKVEDLNKLPYLQAVMKETMRMKPIAPMAIPHKASKDTSLMGKKINKGTVVMVNLYAIHHNPAVFPEPYK…
Papaver_bracteatum|Pbr_contig_1898.25		MAPINIEENDFWMIACTVIIVFALMKFMVSFYQSANTTEWPEGPKTLPIIGNLHQLGGGVPLQVALANLAKVYGGAFTIWIGSWVPMIVISDIDNAREVLVNKSADYSARDVPDILKIITANGKNIADCDSGPFWHHLKKGLQSCINPSNVMSLSRLQEKDMQNLIKSMQERASQQNGILKPLDHAKEASIRLLSRVIFGQDFSNEDLVIGVKDALDEMVRISGLASLADAFKIAKYLPSQKKNIRDMYATRDRVYNLIQPHIVSNLPANSFLHFLTSQDYSDEIIYSMVLEIFGLGVDSTAATAVWALSFLVGEQEIQEKLYREINNLTGGQRPVKVVDLKELPYLQAVMKETLRMKPIAPLAVPHVAAKDTTFKGRRIVKGTKVMVNLYAIHHDPNV…
Papaver_bracteatum|Pbr_contig_3484.38		MELPPGPRKLPVIGNLHQLNKGGELVHVTLAKMAQEHGKIMTVWFGGKQPSIVVSHHDAAWEVLVTKASDFSSRTLPYMSKFSSADWRTLATCNLGPFWQNLRKGLQTTTLNPHAFAAQVHLQQKDIANLVLDLKEEASLNGGIVKPMIPLRRTTIQLIGRFCFGVEFEDKDGFVENIDTVMEETIRLSGHARLVDVFEFTRYIPGFRLLFKDAYELKHKIEETIRPYIHRYKSSTNCFLQFLLSQEDYSEEVVIFNLFEQFLLSTDSTSNATSWALAYLIHNEKIQEKVYAEVQELTGNGHPRDELITVEEVSKLKYVNAVVKEVLRMKPIAPLAVPHQAVCDSNLMGIKRFKPERFLSKANVAMERSLIAFGAGRRICAGMDLAKLQVALTLANLVN…
Papaver_bracteatum|Pbr_contig_3484.39		MELPPGPRKFPIIGNLHQLNKRAELVHVTLAKLAQEHAKIMTVWFGGKQPSIVVSHHEAAWEVLVTKDSDFSSRTLPYMSKLSSADWHTLATCNLGPFWQNLRKGLQTTTINPHAFAAQVHLQEKDIANLILDLKEEASLNGGIVKLMIPLRRTTIQLIGRICFGETIRLSGHARLVDVFEFTRYIPGFSLLFKEAYELKHKIEETIRPCIRRYKSSTNCFLQFLLSQEDYSEEVVIFNLFEQFLLSTDSTSNATSWTLAYLIHNEKIQQKVYAEVQELTGCGHPRDGMITIEEVSKLKYVNAVVKEVLRMKPIAPLAVPHQAVRKGTPVMVNIYAVHYDPTVWAEPQRFMPERFLWDLNDGGDKSKATTLSMERSFIAFGAGRRICAGMDLEKLQVAL…
Papaver_bracteatum|Pbr_contig_3494.3		MENICLITASTVLIIFALAKFLASKISSPSAMKWPAGPKTLPIIGNLHQLGGDLFHVVLANLAKVHGGVFTIWMGSWNPVIIVSDVNSAREVLISKSSDFSSRNVPDYLKIVSADGKSISESDCGPFWHGLRKGLQGVALNPLHVMSQSHLQERDMQNLIKYMQEDASKRDGVIQPLDYVKKDAIRLLSRIVFGQDFSNEDFVAAMNHTLHNLVRIGGFGSLADAFKVGEYLPSHKKFIRELNAVSEEAANLILPYIASKPSKNTYLHFLVSQEYSEDVIVSAVLEIFSMAADSTAATTVWALAFLVREQDIQEKLYLEIKNVTGGNRPLQVADVKKMSYLQAVIKETLRMKTVGPMAIPHKASKDTSLMGRKIDKGTQVMVNLYAIHHNSDVFPKPYK…
Papaver_bracteatum|Pbr_contig_3494.5		MAENFWFIAASTVIIVFALAKFILHKKSSHTAATEWPAGPKTLPIIGNLHQLRGDDFHVRMANFAKVHGGIFTLWIGSWHPVIIINDIASAWEVLVTKSSDYSSKYKPDYYPKDVNSSGNEKYTNIAESDVSPFWTNLRKGLQSVALGPLNVKSQTHLQERSMHRLIKSMQQKALQQNGILKPLDYLKEESIRLLSVLIFGQDFSDENFVVRMNRILYDLVRIDQITSLSDAFHIAKYLPSSKKVIRELDDVMEQAASLIIPYISTSKTPPANTYLNFLKSQDYSEEVIVSSIIEVYTLGVDSTSEAIVWALTFLVRDPKIQEKLYHEIKNVTGGNRPVQVNDLKKMSYLQAVMRETLRMKPIGPVIFTHEAAKDTSLMGEKVGKGTRIMVNLRAIHYN…
Papaver_bracteatum|Pbr_contig_3528.6		MVWPTGPKTLPIIGNMHVLGGTALQVVLHNLAKIHGNVMTIWIGSWRPVIVVSDIDRAWEVLVNKSSDYSARDMPEITKIISADWKTISTSDSGPGWSNLRKGLQNVALSPHNLAAQSQFQEKDITKMIQSLKKEAASNNGIVKPIDHLKKATLRVISRLIFGQDFDDDKYVADMHHAIEELIRVSGYAQLAEAFYYAKYLPSHKKAVRDVEEANKRVKKLVRPFLSLNPPTNTYLHFLNSQKYDEEVIIFAIFEAYLLGVDSTSLTTAWALAFLIREPVVQEKLYQEIKDFRVKNDREIVKVEDLNKLQYLQAVLKETMRMKPIAPLAIPHKACRDTSLMGKKIDQGTRVMVNIYALHHNEKVWKEPFKFMPERFLQTQDVVNGKAMEQSLLPFSAGM…
Papaver_bracteatum|Pbr_contig_3528.8		MGETFWLITCGVVVAFALAKLLFGKKSSLSTMEWPAGPKTLPIIGNLHQLGGEAFHVCLANLAKVYGGVFTIWVGSWRPFIVISDVDKAWEVLVNKSSDYSARDMPDITKIISANWKNISHGDSSPFWHNLRKGLQGVALTPFNVAAQHHLQERDMQNLIKSMKEKASQKNGILKPLDYVKEETVRLLSRLIFGQEFVDEDFVVGMHQALDELVSISGYASLADAFKFCENLPSHKKTVRAVHAIKIRFDNLIRPHIVSNPPTNTYLHFLLSQDFSEDVIISAILEVYDLGVDSTASTTVWALTFLVREQKIQEKLYREINNVTGGKRPVKVEDLNKLPYLQAVMKETMRMKPIAPMAIPHKASKDTSLMGKKVNKGTVVMVNLYAIHHNPAVFPEPYK…
Papaver_bracteatum|Pbr_contig_3528.9		MKEMISNTWIPTITSIILAIFAVLMIFRRRKSSSTMEWPVGPKTLPIIGNLHNLGGAAALHVVLHKLAQVYGSVMTIWIGSWKPVIVVSDFDQAWEVLVNKSSDYSSREMPEITKIVTENWRTIVNSDTGPCWATLKKGLHTVALSPQNIAFQTALQEEDIKEAVRLIRRLIYGKDFNDGKYVKSMHDEIEFLTHFGSYPQLTDVFYYAKYLPSYKRAVKAMVRPFLASNPPTNTYLHFLKSQNYPEDVIVFAIYEAYLLGVDSTSTTTTWALAFLMREPSVQEKLYQDLKNFTADNNRTMLKVEDVNKLPYLQAVVKETMRMKPIAPLAIPHKECKDKVDKGNNIMVNIHSLHHTEKVWREPYRFMPESAGMRICAGMELGKLQFSFSLANLVKAFKW…
Papaver_bracteatum|Pbr_contig_3639.1		MDENILFIIAGTAIILALATFILVSRKSSPSAMEWPAGPKTLPIIGNLHQLKGDLFHVVLANFAKVHGGVFTIWIGSWSPVIIVSDVNSAREVLVTKSSDYSARNVSDYLKIVSADGESIADSDSGPFWHNLRKGLQNVALNPLSVMSQSHLQERDMQKLIKSMQENASRENRILKPLDYVKKETVRSISRIIFGQDFSNEDFVVAMSQTVHNLVRIGGFASLADAFKVGEYNSISAHAANLILPYIASKPPVNTYLHFLTSQEYSEDVIISAILEIYGLAADSCASTIVWALTFLVREQEIQEKLYCKIKNTTGGTRPVKIADLKKMPYLQAVVKETLRMKCVGPMAIPHKATRNTSLMGKKIDKGTQVMVNLYAIHHNSEVFLEPFKFMPERFLKDV…
Papaver_bracteatum|Pbr_contig_4261.21		MKGIMSDSWILTVASFAFFAVLMIFRRRKSASRMEWPIGPRTLPILGNLHILGGSARHVVLQKLAQVYGGNLMTIWIGSWKPVIIVSDFDGAWEVLVNKSSDYSAREMPEITKIGTANWRTILSSDSGPSWATMKKGLQSVALSPQNLASQTALQQRDIRKLIENLEEEAALNNGVVKPLDHLKKVTVRLISRLIYGQDFDDDKYVEDMHNEIEFLSRLKGHARLAEIFYYAKYLPSHKKAVRGAEEAKRRVTELVRPFLASNPPHNTYLHFLKSQNYPEEVIIFAIYEAYLLGVDSTSTTTTWALAFLIREPSVQEKLYQELKNFTTDSNSRMLKVEDINKSPYLHAVVKETMRMKPIAPLAMPHKSCKDTSLMGKKVDKGTKVIVNIHALHHTEKVW…
Papaver_bracteatum|Pbr_contig_5105.15		MEWPAGPKSLPIIGNLHQLGGDLLHVVLANLAKVHGGVFTIWIGSWNPVVIVSDVHSAREVLITKSSDYSGRVVPDYIKLISADGENISDSDSGPFWHNLRKRLQGVALNPPSIMSQSHLKERDMQNLIKSMQENASRENGIVKPLDYVKKDAIRLVSRIIFGHEFSNEEFVAAMTHTLHNFVRIGEFARLADAFKIATYLPSHKKIVRKMNDVGAQGANLIIPCMASKPPSNTYLHFLMSQGYSEDVTVSAILEIYGLAADIREQEVQEKLYLEMKNVTGSTRPVKIADLKQMSYLEAVVKETLRMKCIGPLAIAHKATKNTSLMGKKIDKGTAVMVNIYAIHHNSDVFPEPYKFMPKRFLKEFNSDGSLGDGEKMKSSLLAFGAGMRVCAGTDIAKL…
Papaver_bracteatum|Pbr_contig_5105.17		MDDKFLVITASTVLIVLALAKLLVSRKSSISAMEWPAGPKTLPIIGNLHQLGGDVLHVVLANLAKVHGGVFTLSIGSWNPVIIVSDVHSAREVLISKSSDYSGRVVPDYIKLISADGENISDSDSGPFWHNLRKGLQGVALNPLSIVSQSHLQERDMQNLIKSMQENASRENGIVKPLDYVKKDAIRLVSRIMFGHDFSNEEFVAAMSHTLHNFVRIGEFARLADAFKIATYLPSHKKIVRKMNAVGAQGANLILPYLASKPPSNTYLHFLMSQDYSEDVIVSAILEIYGLAADSVAETTVWALTFLVREQEVQEQLYREIKNVTGGTTPVKIADLKQMSYLEAVVKETLRMKSIGPLAIPHKAMKNTSLMGKKIDKGTQVIVNIYAIHHNSDVFPEPY…
Papaver_bracteatum|Pbr_contig_5302.52		MDGNSLFIIAGTVVIVLAIAKILALRKSYPSGTEWPAGPKTLPLIGNLHQLWGDLFHVVLAKLAKVHGGVFTIWLGSWNPVIIVSDVNSAREVLLTKSSDYSARNYPGYLTVLSEGNDSINGSDCGPFWHNLRKGLTSGSLNPLNVTSQSHLQERDMQNLIKSMTENASRENGILRPLDYVKKEAIRLLNRTIFGQDFSNDEDFIVGIHHTVHHLISIGGFANLADAFKIGEYVPRHRRYIRGLYDVGEQAAKLILPHVVASKPPTNSYLHFLKSQDFSDEVIVSLILEVYGFATDSIASTIVWALTYLVREQKIQEKLYCEIKEVTGGTRPVKIADLNKMSYLKAVVKETIRMKPLGPMAIAHKATKNTSLMGRKIDKGTPVMVNIYAIQHNSEVFPE…
Papaver_californicum|Pca_contig_5130.114		MEGIQWIILSILVGVLMIWKKWFAKSNTMELPPGPRKLPIIGNLHQLNKGGELVHLTLAKMAQEHGKIMTVWFGGQQPSIVVSHHDVAWEVLVTKASDFSSRTLPYMSKFTSADWHTLATCNLGPYWQNLRKGLQTAALNPHTFSAQVHLQEKDIANLILNFKEEASLNGEIVKPMVPLRRATVQLIGRFCFGVEFEDKDGFVENIDTVMEETIRLSGHARLVDAFEFTQYIPGFRLLFKEAYELKQKIEETIRPCIHRYESSTDCFLQFFLSQEDYSEEVVIFNLFELFLLSTDSTSNATSWALAYLIHNEKIQQKVYAEVQELTGCGNPREEMITIEEVSKLKYVNAVVKEVLRMKPIAPLAVPHQAVYDSNLMGIKVRKGTPVMVNIYAVHYDPTV…
Papaver_californicum|Pca_contig_9735.1		MVWPTGPKTFPIIGNMHLLGGTALQVVLHKLSKIHGNVMTIWIGSWRPVIVVSDIDRAWEVLVNKSSDYSARDMPEITKIISADWKTISTSDSGPSWSNLRKGLQNVALSPHNLAAQSQFQEKDVTKMIQSLKKEAASNNGIVKPIDHLKKATLRLISRLVFGQGFDDDKYVDDMHHAIEELIRVSGYAQLAEAFYYAKYLPSHKKAVRDVEEANQRVKKLVRPFLSLNPPTNTYLHFLNSQKYDEEVIVFAIFEAYLLGVDSTSLTTAWALAFLIREPVVQEKLHQELKNFAVKNDGEIVKVEDLNKLQYLQAVLKETMRMKPIAPLAIPHKACRDTSLMGNKIDQGTRVMVNIYALHHNEKVWKEPYKFTPERFLQTQDVVNGKAMEQSLLPFSAGM…
Papaver_californicum|Pca_contig_14272.36		MDDNSFFIIAGTVIIVLAFAKFLALRKSYPTATEWPAGPKTLPIIGNLHQLWGGLFHVVLANLAKVHGGVFTIWLGSWNPIIIVSDVNSAREVLLTKSSDYAARNMPDYLKVLSEGADGINGSDAGPFWHNLRKGLTSVALNPLNVMSQSHLQERDMQNLIKSMQENASRENGISRPLDYVKKEAIRLLSRTIFGQHFSDEDFVDGMHHTIHHLISIGGFASLADAFKIGEYVPRHKDYIRGLNNVGEQSAKLILPYLASKPPTNTYLHFLKSQDFSEDLIISAIVEVYGFATDSIAATIVWALTFLVREQEIQEKLYREIKNVTGGTRPVKIADLKDMSYLKAVMKETIRMRPIGPMAVAHKATKNTSLMGKKIEKGTPVMVNVYAIQHNPEVYPEPY…
Papaver_californicum|Pca_contig_14426.123		MEETFWLVTCGVVVAFALAKLLLFGKKNSPLSTMEWPEGPKKLPILGNLHQLGGEAFHVCLANIAKVYGGVFTIWVGSWRPFIVISDVDKAWEVLVNKSSDYSARDMPDITKIISANWKNISHCDSGPFWHNLRKGLQSVALTPFNVASQYHLQERDMQNLIKSMKEKASQKNGILKPLDYVKEETVRLLSRLIFGQEFVDEDFVVGMHKALDELVSISGYASLADAFKFCENLPSHKKTIRAVHAIKKRFDSLIRPHIVPNPPTNTYLRFLLSQDFTEDVIISAILEVYDLGVDSTASTTVWALTFLVREQKIQEKLYREINNVTGGRRPVKVEDLNKLPYLQAVMKETMRMKPIAPMAIPHKASKDTSLMGKKINKGTVVMVNLYAIHHNPAVFPEP…
Papaver_californicum|Pca_contig_15576.23		MENICLITASTVIIVFALAKFLATKISSPSAMKWPTGPKTLPIIGNLHQLGGDLFHVVLANLAKVHGGVFTIWIGSWNPVIIVSDVNSAREVLVSKSSDYSSRNVPDYLKIVSADGKSISESDCGPFWHGLRKGLQGVALNPLHVMSQSHLQETDMKNLIKSMQEDASQEGGVIQPLDYVKKEAIRLLSRIVFGQDFSNEDFVVAMNQTLHNLVRIGGFASLADAFKVGEYLPSHKKFIRELNAVGEEAANLILPYIASKPPKNTYLHFLVSQEYGEDVIVSAILEIFSMAADSTAATTVWALAFLVREQGIQEKLYREIKNTTGGNRPVQVADVKKMAYLQAVIKETLRMKTVGPMAIPHKTSKNTSLMGMKIDKGTQVMVNLYAIHHNSDVFPKPYE…
Papaver_californicum|Pca_contig_15576.25		MEENFWFITASTVIIVIAVAKFLLRNKKSSSHSSVTEWPAGPKTLPIIGNLHQLGGDDFHVRMANFAKVHGGVFTIWIGSWRPVIIINDIASAWEVLVTKSSDYSSKHKPDSFKDNSSAANEEKNINIAESDVGPFWINLRKGLQSVALGPLNVTSQTHLQERSMHRLIKSMKQKALQQNGIIKPLDYLKEESIRLLSVLIFGQDFSDEDFVVAMNRMLHDLVRIDQIISLADAFHIAKYLPSSKKVIQELDGVMEQASNLILPHINTSKPPPTNTYLHFLKSHCYSKEVIVNAIIEVYTLGVDSTSEAIVWALTFLVREPKIQEKLCQEIKNVTGGNRPVQVDDLKKMSYLQAVMRETLRMKPIGPVIFTHEATKDTSLMGKKVGKGTRIMVNLRAIH…
Papaver_californicum|Pca_contig_16695.4		MVENSFAIIAGTVIIVLAFAKFIALRKSYPTATEWPAGPKTLPLIGNLHQLWGGLFHVVLANLAKVHGGVFTIWLGSWNPIIIVSDVNSAREVLLTKSSDYSARNMPDYLKVLSEGADGINGSDARPFWHNLRKGLTSVALNPLNVMSQSYFQERDMQNLIISMQENASRENGISRPLDYVKKEAIRLLSRTIFGQDFSDEDFVDGMHHTIHHLISIGGFASLADAFKIGEYVPRHRDYIRGLNDVGEQSAKLILPYLASKPPTNTYLHFLKSQDFSEDLIISAIVEVYGFATDSIAATIVWALTFLVRDQEIQEKLYHEIKNVTGGTRPVKIPDLKEMSYLKAVMKETIRMRPIGPMAVAHRATKNTSLMGKKIAKGTPVMVNVYAIQHNPEVFLEPY…
Papaver_californicum|Pca_contig_21100.46		MEENFCPITAGSVIIVFALAKFLATKISSPSAMKWPAGPKTLPIIGNLHQLGGDLFHVVLANLAKVHGGVFTIWIGSWNPVIIVSDVSSAREVLVSKSSDYSSRNVPDYLKIVSADGKSISESDCGPFWHGLRKGLQGIALNPLQIMSQAHLQERDMKNLIKSMQEDASQESGVIQPLDYVKKEAIRLLSRIVFGQDFDNEDFVASMNQTLHNLVRIGGFASLADAFKVGEYLPSHKKFIRELNAVSEEAANLILPYIASKPPKNTYLHFLVSQEYGEDVIVSAILEIFSMAADSTAGTTVWALAFLVREQDIQEKLYREIKNVTGGNRPVQVADVKKMAYLQAVIKETLRMKTVGPMAIPHKTSKNTSLMGMKIDKGTQVMVNLYAIHHNSDVFPKPY…
Papaver_californicum|Pca_contig_21100.48		MEENFWFIIASTVIIVFALAKFLLHKKSYSHSATTTEWPAGPKTLPIIGNLHQLGGDDFHVRMANFAKVHGGVFTLWIGSWSPVIIINDIASAWEVLVTKSSDYSSKHKPDSFKDNSAAREEKNINIAESDVGPFWINLRKGLQSVALGPLNVTSQTHLQERSMHRLIESMKQKALQQNGILKPLVYLKEESIRLLSVLIFGQDFSDEDFVVAMNRMLHDLVRIDQIISLADAFHIAKYLPSSKKVIRELDGVIEEASNLILPHITTSKPPATNTYLHFLKSQGYSEEVIVNAIIEVYTLGVDSTSEAIVWALTFLVREPKIQEKLYQEIKNVTGRNRPVQVDDLKKMFYLQAVMRETLRMKPIGQVIYTHEAAKDTSLMGKKVGKGTRVMVNLRAIHY…
Papaver_californicum|Pca_contig_32650.1		MDENSFFIIAGTVIIVLAFAKFVALRKSYPAATEWPAGPKTLPIIGNLHQLWGGLFHVVLANLSKVHGGVFTIWIGSWNPIIIVSDVNSAREVLLTKSSDYSARSYPDYITILSEGPDSINASECGPFWHNLRKGLQSVALNPLNVMSQSHLQERDMKNLIKSMQENASRENGILKPLDYLKKESIRLLGRTIFGQDFSNDEDFVVGMHHTVHDILSTGGFARLADAFKICEYLPRHKRYMRGLQYAAGEQAASLILPHIASKPPKNTYLHFLKSQDFSEDVIVSLILEVYAFAVDSVASTIVWALTFLVREQKIQEKLYREIKNVTGGTRPVKVADVNNMSYLKAVMKETIRMKPIGPMGISHRATKNTSLMGKKIDKGTPVMVNIYAIQHNSEVFPE…
Papaver_nudicaule|Pnu_contig_37769.1		MELPPGPKKLPIIGNLHQLNKVGELVHVTLAKMAQEHGKMMTVWFGGQQPSIVVSHYEVAWEVLVTKASDFSSRTLPYMSKFSSADWHTIATCNLGPFWQNLRKGLQTTTLNPHTFTAQVHLQEKDIADLILNFKEEASLNGGVVKPMIPLRRTTVQLIGRFCFGVEFEDRDGFVESIDTLMEETIRLSGHARLVDVFEFTRYIPGFRLLFKEAYELKQKIEETFRPYIHRYKSATNCFLHFLLSTDSTSNATSWALAYLIHNEKIQQKVYAEVQELTRSGRQKEEMVTVEEVSKLKYVNAVVKEVLRMKPIAPLAVPHQAVCDSNLMGIKVRKGTPVMVNIYAVHYDPTVWTEPQRFMPERFLKDGDTSKAMERSLIAFGAGRRICAGMDLAKLQVAL…
Papaver_nudicaule|Pnu_contig_44339.1		MTIWIGSWRPVIVVSDIDRAWEVLVNKSSDYSARDMPEITKIISADWKTISTSDSGPAWSNLRKGLQNVALSPHNLAAQSQFQEKDITKMIQSLKEEAASNNGIVKPIDHLKKATLRLISQLIFGQDFDNDKYVDDMHHAIEELIRVSGYAQLAEAFYYAKYLPSHKKAVRDVEEANQRVKKLVRPFLSLNPPPNTYLHFLNSQNYDEEVIIFAIFEAYLLGVDSTSLTTAWALAFLIREPVVQDKLYQELKNFAVKNDREIVKVEDLNKLKYLQAVLKETMRMKPIAPLAIPHKACRDTSLKGNKIDKGTKVMVNIYALHHNEKVWKEPYKFMPERFLQAQDVVNGKAMEQSLLPFSAGMRICAGMELGKLQFSFSLANLVNAFEWSCVSDGVLPDMS…
Papaver_nudicaule|Pnu_contig_170154.1		MEETFWLITCGVVVAFALAKLLFGKKSSLSTMEWPAGPKKLPIIGNLHQLGGAAFHVCLANLAKSYGGVFTIWVGSWRPFIVISDVDRAWEVLVNKSSDYSARDMPDITKIISANWKNISHCDSGPFWHNLRKGLQSVALTPFNVASQCHLQERDMQNLIKSMREKASRTNGILKPLDYVKEETVRLLSRLIFGQEFVDEDFVVGMHQALDELVSISGYASLADAFKFCENLPSHKRTVQAVHAIKKRFDSLIRPHIASKPPTNTYLHFLLSQDFSEDVIISAILEVYDLGVDSTASTTVWALTFLVREQKIQEKLYREINSVTGGKRPVKVEDLNKLPYLQAVMKETMRMKPIAPMAIPHKASKDTSLAGKKINKGTVVMVNLYAIHHNPDVFPEPYK…
Papaver_nudicaule|Pnu_contig_178455.1		MEETIFSNSWILTTSSLVVVTIITMLMVFKRKKSSTMVWPKGPKTLPIIGNMHILGGTALQVVLHNLAKIHGNVMTIWIGSWRPVIVVSDIDRAWEVLVNKSSDYSARDMPEITKIISADWKTISTSDSGPAWSTLRKGLQNVALSPHNLAAQSQFQEKDIAKMIQSLKKEAASNNGIVKPIDHLKKATLRLISRLIFGQDFDNDKYVDDMHHAIEELIRVSGYAQLAEAFYYAKYLPSHKKAVRDVEEANQRVKKLVRPFLSLNPPTNTYLHFLNSQNYDEEVIIFAIFEAYLLGVDSTSLTTAWALAFLIREPVVQDKLYQELKSFAVKNDREIVKVEDLNKLGYLQAVLKETMRMKPIAPLAIPHKACRDTSLKGNKIDKGTRVMVNIYALHHNEK…
Papaver_nudicaule|Pnu_contig_197756.1		MEETFWLITCGVVIAFALAKLLFGKKSSLSTMEWPAGPKKLPIIGNLHQLGGAAFHVCLANLAKVYGGVFTIWVGSWRPFIVISDVDRAWEVLVNKSSDYSARDMPDITKIISADWKNISHCDSGPFWHNLRKGLQSVALTPFNVASQNHLQERDMQNLIKSMKEKASRTNGILKPLDYVKEETVRLLSRLIFGQEFVDEDFVVGMHQALDELVSISGYASLADAFKFCENLPSHKKTVQAVHAIKKRFDSLIRPHIVSKPPTNTYLHFLLSQDFSEDVIISAILEVYDLGVDSTASTTVWALTFLVREQKIQEKLYREINSVTGGKRPVKVEDLNKLPYLQAVMKETMRMKPIAPMAIPHKASKDTSLAGKKINKGTVVMVNLYAIHHNPDVFPEPYK…
Papaver_nudicaule|Pnu_contig_208729.1		MEETFWLITCGLVVAFAVAKLLFGTKSSLSTMEWPAGPKKLPIIGNLHQLGGETFHHCLANLAKVHGSPFTIWVGSWRPVIIICDVDRAWEVLVNKSSDYSARDMPDITKIASADWKNISHCDSGPFWHNLRKGLQSVALTPFNVESQYHLQERDMQNLIRSMEEKASHKNGLLKPLDYVKEETLRLVSRLIFGQDFVDEDFVAGMHHALHDYIETIGTASLADAFKICENLPSYKKIVRAVHAIKKRIDSLIRPHLVSKPPTNTYLHFLLSQEFSEDVIISAIHEVYDLSVDSTSSTTVWALAFLVREQKIQEKLYREIQSVTGGKRLVKVEDISKLPYLQAVMRETLRMKPFAPMAIPHKASKDTSLMGKKVNKGTVVMVNLYAIHHNPDVFPEPDK…
Papaver_nudicaule|Pnu_contig_231793.1		MELPPGPKKLPIIGNLHQLNKGGELVHATLAKMAQEHGKMMTVWFGGQQPSIVVSHYDVAWEVLVTKASDFSSRTLPYMSKFSSADWHTLATCNLGPFWQNLRKGLQTTALNPHTFSAQVHLQEKDIADLILNFKEEASLNGGIVKPMIPLRRTTVQLIGRFCFGVEFEDRDGFVEHIDALMEETIRLSGHARLVDVFEFTRYIPGFRLLFKEAYELKQKIEETFRPYIHRYNSATNCFLQFLLSQGDYSEEVVIFNLFELFLLSTDSTSNATSWALAYLIHNEKIQQKVYAEVQELTRSGRQKEEMVTVEEVSKLKYVNAVVKEVLRMKPIAPLAVPHQAVCDSNLMGIKVRKGTPVMVNIYAVHYDPTVWTEPQRFMPERFLGKATVAMERSLIAFG…
Papaver_nudicaule|Pnu_contig_259062.1		MPDYIKIVSADGKSISESDAGPFWHSLRKGLQGGALNPLHVMSQSHLQERDMLNLIKSMQENAVQENGIIKPLDYVKKEAIRLLSRIVFGQDFSNEDFVVAMNHTLHSLVRIGGFASLADAFKIGEYLPSHKQFIRELEIVGEQAANLVLPYIASKPSKNSYLHFLTSQGYGEDVIVSAILEVFSMAADSTAATTAWALAFLVREQETQEKLYREIKNVTGGNRPVQIVDLKKMSYLQAVIKETLRMKTVGPMAIPHKASKNTSLMGKKIDKGTQVMVNLYAIHHNSDVFPEPYKFMPERFLKDVNRDASLGDREKMEGSLLAFGAGMRVCAGTDIAKLIISFSIASLVNEFKWDCVSEGELPDLSEDLSFILLMKNPLEARITPRVG*
Papaver_nudicaule|Pnu_contig_262822.1		MEETFWLITCGLVVAFAVAKLLFGTKSSLSTMEWPAGPKKLPIIGNLHQLGGETFHHCLANLAKVHGSPFTIWVGSWRPVIIICDVDRAWEVLVNKSSDYSARDMPDITKIASADWKNISHCDSGPFWHNLRKGLQSVALTPFNVESQYHLQERDMQNLIRSMEEKASHKNGLLKPLDYVKEETLRLVSRLIFGQDFVDEDFVAGMHHALDDYIETIGTASLADAFKICENIPSYKKIVRAVHAIKKRIDSLIRPHLVSKPPTNTYLHFLLSQEFSEDVIISAIHEVYDLSVDATSSTTVWALAFLVREQKIQEKLYREIQSVTGGKRPVKVEDISKLPYLQAVMRETLRMKPIAPMAIPHKASKDTSLMGKKVNKGTVVMVNLYAIHHNPDVFPEPDK…
Papaver_nudicaule|Pnu_contig_265533.2		MEENLSMIIIVSSLILAFASAKFLFSKKSSLSTTTEWPAGPRKLPIIGNLHQLGGDAPFHVVLANLAKVYGGVFTIWVGSWRPMIIISELDKAWEVLVNKSSDYSARDMPNITKVISANWQNIVHSDSGPFWHNIRKGLQNVALSPLNVSSQSHLQERDMRNLIKSMQQSASQKNGILKPLDYVKEEAVRLVSRLIFGQDFVDENFVVGMRRALEELERISGYASLYSSLADAFRFCEHLPGHKKSVREVNAMKERSENLIRPHIVSNPPPNTYLHFLISQDFSEDVIISAILEVFSLSVDSIAGTTVWALTFLVREQKIQEKLYCEIKKATGGRRPVKVEDVNKLPYLQALMKETMRMKPIAPLAIPHKASKETSLMGKNIDKGTVVMVNLYAIQHNP…
Papaver_nudicaule|Pnu_contig_271412.1		MEETFWLITCGVVVAFALAKLLFGKKSSLSTMEWPAGPKKLPIIGNLHQLGGAAFHVCLANLAKSYGGVFTIWVGSWRPFIVISDVDRAWEVLVNKSSDYSARDMPDITKIISANWKNISHCDSGPFWHNLRKGLQSVALTPFNVASQCHLQERDMQNLIKSMREKASRTNGILKPLDYVKEETVRLLSRLIFGQEFVDEDFVVGMHQALDELVSISGYASLADAFKFCENLPSHKRTVQAVHAIKKRFDSLIRPHIASKPPTNTYLHFLLSQDFSEDVIISAILEVYDLGVDSTASTTVWALTFLVREQKIQEKLYREINSVTGGKRPVKVEDLNKLPYLQAVMKETMRMKPIAPMAIPHKASKDTSLAGKKINKGTVVMVNLYAIHHNPDVFPEPYK…
Papaver_nudicaule|Pnu_contig_323085.1		MKEMMSNSCILTVTSTILAVFAVLMIFRRRNSTSTKEWPVGPRTLPIIGNLHILRGTALHVVLHKLAKVYGSVMTLWIGSWKPLIIVSDFDRAWEVLVNKSSDYSGREMAEITKIGTANWRTILSSDSGPFWATLRKGLQSTALSPQNLASQTALQETDIRKLTENWKDEATLSNGIIKPLDHLKRATVRLISRLIYGRNFDDDKYVEAMHNEIEFLTRLKGHARLAEVFYLAKYLPSNKRAVRGAEVAKRRVIDLVRPFLASSPPTNTYLHFLKGKNYPEEVIIFAIYEAYLLGVDSTSTTTTWALAFLIREPSVQEKLYQELKKFTADNNRTMLKVEDKQITIFTCCSIPHKACKDTSLMGKKVVRGTKIMVNIHALHHTDKVWKEPYKFMPERFLQ…
Papaver_rhoeas|Prh01G51830.0		MENICLITASTVIIIFAFARFLASKISSPSAMKWPAGPKTLPIIGNLHQLGGDLFHVVLANLAKVHGGVFTVWMGSWNPVIIVSELNSAREVLISKSSDFSSRNVPDYLKIVSADGKSISESDCGPFWHGLRKGLQGVALNPLHVMSQSHLQEKDMQNLIKSMHEDASKVDGVIQPLDYVKKDAIRLLSRIVFGQDFSNEDFVAAMNRTLHNLVRIGGFASLADAFRVGEYLPSHKRFIRELNAVSEEAANLILPYIASKPSKNTYLHFLVSQQYSEDIIVSAVLEIFSMAADSTAATTVWALAFLVREQDIQEKLYHEIKNVTGGNRPLQIADVKKMSYLQAVIKETLRMKTVGPMAIPHKASKDTSLMGRKIDKGTQVMVNLYAIHHNSDVFPKPYK…
Papaver_rhoeas|Prh03G46000.0		MEWPVGPKTLPVIGNLHILGGTALHVVLHKLAAEVYGSVMTIWIGSWKPVIIVSDFDRAWEVLVNKSSDYSAREMPEITKIGTANWRTISSSDSGPFWATLRKGLQNVALAPQNLASQTAYQERDIRKLIENLKEEAALNSGVVKPLDHLKKSTVRLISRLIYGQDFDDDSYVEDMHEVIEFLIRISGYAQLAEVFYYAKYLPSHKRAVKGAEEAKTRVIALVSPFLLSSPPTNTYLHFLKSQNYPEEVIIFAIFEAYLLGVDSTSSTTAWALAFLIREPSVQEKLYQELKNFTANNNRTMLKVEDVNKLPYLQAVVKETMRMKPIAPLAIPHKACKDTSLMGKKVDKGTKVMVNIHALHHTEKVWKEPYKFMPERFLEKHDKAMEQSLLPFSAETVLK…
Papaver_rhoeas|Prh03G43070.0		MMSNSWIEILSVTSTILAFFAAFMIFRRRKLTTSTMEWPVGPKTLPVIGNLHILGGTALHVVLHKLAAEVYGSVMTIWIGSWKPVIIVSDFDRAWEVLVNKSSDYSAREMPEITKIGTANWRTISSSDSGPFWATLRKGLQNVALAPQNLASQTAYQERDIRKLIENLKEEAALNSGVVKPLDHLKKSTVRLISRLIYGQDFDDDRYVEDMHEVIEFLIRISGYAQLAEVFYYAKYLPSHKRAVKGAEEAKTRVIALVSPFLLSNPPTNTYLHFLKSQNYPEEVIIFAIFEAYLLGVDSTSSTTAWALAFLIREPSVQEKLYQELKNFTANNNRTMLKVEDVNKLPYLQAVVKETMRMKPIAPLAIPHKACKDTSLMGKKVDKGTKVMVNIHALHHTEK…
Papaver_rhoeas|Prh03G43080.0		MEETFWLVTCGVVAAFVLAKLLFGGKSSLSTMEWPAGPKKLPIIGNLHQLGGEAFHVCLANLAKLHGSVFTIWVGSWRPFIVISDVDKAWEVLVNKSSDYSARDMPDITKIISANWKNISHCDSGPFWHNLRKGLQSVALTPFNVASQYHLQERDMQNLIKSMQEKASHRNGILKPLDYVKEETVRLLSRLIFGQDFVDEDFVVGMHQALDELVSISGYASLADAFKFCENLPSHKKTIQAVHSIKKRFDNLIRPHIVSKPPTNTYLHFLLSQDFSEDVIISAILEVYDLGVDSTASTTVWALTFLVREQKIQEKLYCEIKNVTGGKRPVKVEDLNKLPYLQAVMKETMRMKPIAPMAIPHKASKDTSLMGKHINKGTVVMVNLYAIHHNPDVFPEPYK…
Papaver_rhoeas|Prh03G43200.0		MEDIFSSSWILITSTMVVITTITMLLTFARKKPSTMEWPTGPKTLPIIGNMHILGGTALQVVLHNLAKIHGNVMTIWIGSWRPVIVVSDIDRAWEVLVNKSSDYSARDMPEITKIISADWKTISTSDSGPAWSNLRKGLQNVALSPHNLAAQSQFQEKDITKMIQSLKQEAASNNGIVKPIDHLKKATLRLISRLIFGQDFDNDKYVDDMHHAIEELIRVSGYAQLAEAFYYAKYLPSHKKAVRDVEEANQRVKKLVRPFLSLNPPTNTYLHFLNSQNYAEEVIVFAIFEAYLLGVDSTSLTTAWALAFLIREPVVQDKLYQELKNAAAKNDGEIVKVEDLNKLQYLQAVLKETMRMKPIAPLAIPHKACRDTSLKGNKIDQGTRVMVNIYALHHNEKV…
Papaver_rhoeas|Prh07G34110.0		MEETFWLITCGVVVAFASAKLLFGKKSSLSSMEWPAGPKKLPIIGNLHQLGGEAFHVCMANLAKVHGSVFTIWLGSWRPFIVINDVDKAWEVLVNKSSDYSARDMPDITKIVSANWKNISHCDSGPFWHNLRKGLQNVALTPFNVASQYHLQERDMQNLIKSIQEKTSHTLKPLDYVKEETVRLLSRLIFGQDLVDEDFVVGMHQALDEYIETISKASLADVFKLCENLPSHKKTIRAVHAIKKRIDSLIRPHIVSKPPTNTYLHFLLSQDFSEDVVISAIHEVYDLGVDATSLTTVWALTFLVREQKIQEKLYREIQNVTGGERPVKVEDVNKLPYLQAVMKETMRMKPIAPMAIPHKALKDTSLMGKKINKGTVVMVNLYAIHHNPDVFPEPYKFMP…
Papaver_rhoeas|Prh07G35340.0		MKEVMSDSWILTVTSTVYAIFAVLIIFRRRKSASRMEWPVGPRTLPIVGNLHILGGSARHVVLQKLAQVYGGNVMTIWIGSWKPVIIVSDFDAAWEVLVNKSSDYSAREMPEITKIGTANWRTILSSDSGPFWATLKKGLQTVALSPRNLASQTALQETDIRKLIENLEEEAVLNNGVVKPLDHLKKTTVRLISRLIYGQDFDDDKYVEDMHNEIDFLSRLKGHARLAEVFNYAKYLPSHKKAVRGAEEAKRRVTELVRPFLASNPPTNTYLHFLKSQNYPEEVIIFAIYEAYLLGVDSTSTTTTWALAFLIREPSVQEKLYQELKKCTADNNRRMLKVEDINKLQYLHAVVKETMRMKPIAPLAMPHKACRDTSLMGKRVDKGTKVIVNIHALHHTEK…
Papaver_rhoeas|Prh07G35510.0		MEKTIFSNSWILTTSTLVAITIVTMLMVFKRKKSSTMDWPAGPKTLPIIGNMHVLGGTALQVVLHNLAKIHGNVMTIWIGSWRPVIVVSDIDRAWEVLVNKSSDYSARDMPEITKIISADWKTISTSDSGPGWSNLRKGLQNVALSPHNLAAQSQFQEKDITKMIQSLKKEAASNNGIVKPIDHLKKATLRVISRLIFGQDFDDDKYVDDMHHAIEELIRVSGYAQLAEAFYYAKYLPSHKKAVRDVEEANKRVKKLVRPFLSLNPPTNTYLHFLNSQKYDEEVIIFAIFEAYLLGVDSTSLTTAWALAFLIREPVVQDKLYQEIKDFTVKNGREIVKVEDLNKLQYLQAVLKETMRMKPIAPLAIPHKACRDTSLMGKKIDQGTRVMVNIYALHHNEK…
Papaver_rhoeas|Prh07G35540.0		MEVTFWLITCGVVVAFALAKLLFGKKSSMSTMEWPAGPKTFPIIGNLHQLGGEAFHVCLANLAKVYGGVFTIWVGSWRPFIVISDVDKAWEVLVNKSSDYSARDMPDITKIISANWKNISHGDSGPFWHNLRKGLQGVALTPFNVASQYHLQERDMQNLIKSMKQKASQKNGILKPLDYVKEETVRLLSRLIFGQEFVDENFVVGMHQALDELVSISGYASLADAFKFCENLPSHKKTVRAVHAIKIRFDNLIRPHIVSNPPTNTYLHFLLSQDFSEDVIISAILEVYDLGVDSTASTTVWALTFLVREQKIQEKLYREINNVTGGKKPVKVEDLNKLPYLQAVMKETMRMKPIAPMAIPHKASKDTSLMGKKVNKGTVVMVNLYAIHHNPAVFPEPYK…
Papaver_rhoeas|Prh07G35550.0		MEVTFWLITCGVVVAFALAKLLFGKKSSLSTMEWPAGPKTFPIIGNLHQLGGEAFHVCLANLAKVYGGVFTIWVGSWRPFIVISDVDKAWEVLVNKSSDYSARDMPDITKIISANWKNISHGDSGPFWHNLRKGLQGVALTPFNVAAQYHLQERDMQNLIKSMKQKASQKNGILKPLDYVKEETVRLLSRLIFGQEFVDEDFVVGMHQALDELVSISGYASLADAFKFCENLPSHKKTVRAVHAIKIRFDNLIRPHIVSNPPTNTYLHFLLSQDFSEDVIISAILEVYDLGVDSTASTTVWALTFLVREQKIQEKLYREINNVTGGKRPVKVEDLNKLPYLQAVMKETMRMKPIAPMAIPHKASKDTSLMGKKVNKGTVVMVNLYAIHHNPAVFPEPYK…
Papaver_rhoeas|PrhUNG40290.0		MEGIQWIILTILVGALMIFCKRWFIKTMELPPGPRKLPIIGNLHQLNTGGELVHVILAKMAQEHGKIMTVWFGGQQPSIIVSHHDAAWEVLVTKASDFSSRTLPYMSKFSSADWHTLATCNLGPFWQNLRKGLQTTTLNPHTLSAQVHLQQKDIAKLILDLKEEASLNGGVLKPMIPLRRTTIQLIGRFCFGVEFEDKDGFVENIDAVMEETIRLSGHARLVDVFEFTRYLPGFRLLFKEAYELKHKIEETIRPFIHRYKASTNCFLQFLLSQEDYSEEVVIFNLFEQFLLSTDSTSNATSWALAFLIHNEKIQEKVYAEVQELTGCGHSREEMVTVEEVSKLKYVNAVVKEVLRMKPIAPLAVPHQAVCDSNLMGIKVRKGTPVMVNIYAVHYDPTVW…
Papaver_rhoeas|PrhUNG41470.0		MDENILFIIAGTVIILALTTFYLVSRKSSPSAMEWPAGPKTLPIIGNLHQLRGDLFHVVLANFAKVHGGVFTIWIGSWSPVIIVSDINSAREVLVTKSSDYSARNVPDYLKIVSADGESIADSDSGPFWHNLRKGLQNVALNPMSVMSQSHLQEGDMQKLIKSMQLNASRENGILKPLDYVKKEIVRCISRIIFGQDFSNEDFVVAMSQTVHDLVRIGGFASLADAFKVGEYLPSHKKFIRELNAISAHAANLILPHIASNPPVNTYLHFLTSQDYSEDVIISAILEIYGLAADSCASTIVWALTFLVREQEIQETLYCEIKNTTDGTRPVKVADLKKMAYLQAVVKETLRMKCVGPMAIPHKATRNTSLMGKKIDKGTQVMVNLYAIHHNSEVFLEPY…
Papaver_rhoeas|PrhUNG07330.0		MDQNSLVIIAGTVIIVLAIAKFLALRKSYPSGTEWPTGPKTLPLIGNLHQLWGDLFHVALANLAKVHGGVFTIWLGSWNPVIIVSDVNSAREVLLTKSFDYSARNYPSYLTVLSEGNDSINGSDCGPFWHNLRKGLTSGALNPLNVTSQSHLQERDMQNLIKSMKEDASRENGILRPLDYVKKEAIRLLSRIIFGQDFPNDEDFIVGIHHTVHHLISIGGFANLADAFKIGEYVPRHIRYIRGLNDVGEKGAKLILPHIVGSKPPPNSYLHFLKSQDFSDDVIVSLILEVYGFATDSIASTIVWALTYLVREQKIQEKLYREIKEVTGGARPVKIADLNKMSYLKAVMKETIRMKPLGPMAIAHKATKNTSLMGRKIAKGTPVMVNIYAVQHNSEVFPE…
Papaver_rhoeas|PrhUNG07590.0		MDENSLIIIAGTVLIVLAIAKILALRKSYPTGTEWPTGPKTLPLIGNLHQLWGDLFHVVLANLAKVHGGVFTIWLGSWNPVIIVSDVNSAREVLLTKSSDYSARNHPGYLTVLSEGNDSINGSDCGPFWHNLRKGLTSGALNPLNVTSQSHLQERDMQNLIKSMQENASRENGILRPLHYVKKEAIRLLNRTIFGQDFSNDEDFIVGIHHIVHHLTSIGEFANLADAFKIGEYVPRHRRYIRGLNDVVSLILEAYGFATDSIASTIVWALTYLVREQKIQEKLYREIKEVTGGTRPVKIADVKKMPYLKAVMKETIRMKPLGPMAIAHKATKNTSLMGRKIDKGTPVMVNIYAIQHNSEVFPEPYKFMPERFLKDVNSDGSLGDIDTMERSYLAFGAGM…
Papaver_rhoeas|PrhUNG07610.0		MDENSLLIIAGTVIIVLAFAKFLALRKSYPTGTEWPAGPKTLPLIGNLHQLWGDLFHVVLANLSKVHGGVFTIWLGSWNPVIIVSDVNSVREVLLTKSSDYSARNYPSYLTVLSEGNDSINGSDCGPFWHNLRKGLTSGALNPLNVASQSHLQERDMQNLIKSMKEDASRENGILRPLDYVKKEAIRLLSRVIFGQDFPNDEDFIVGIHHTVHHLISIGGFANLADAFKIGEYVPRHIRYIRGLNDVGEKGAKLILPHIVGSKPPPNSYLHFLKSQDFSDDVIVSLILEVYGFATDSIASTIVWALTYLVREQKIQEKLYREIKEVTGGNRPVKIADLNKMSYLKAVMKETIRMKPLGPMAIAHKATKNTSLMGRKIAKGTPVMVNIYAVQHNSEVFPE…
Papaver_setigerum|Pse01G04550.0		MDENSLIVIASTVIMVLAIAKILALRKSYPTGTEWPAGPKTLPLIGNLHQLWGDLFHVVLANLAKVHGGVFTIWLGSWNPVIIVSDVNSAREVLLTKSSDYSSRNYPEYLTVLSEGNDSINGSDCGPFWHNLRKGLTSGALNPLNVTSQSHLQERDMQNLIRSLQENASREKGILKPLDYVKKEAIRLLNRLIFGQDFSNDEDFIVGIHHTVHHLISIGGFANLADAFKIGEYVPRHRRYIRGLNDVGEQAAKLILPHIAAKPPTNSYLHFLKSQDFSEDVIVSLILEVYGFATDSIASTIVWALTYLVREPKIQEKLYREIKDVTGGTRPVKIADLNKMSYLKAVMKETIRMKPLGPMAIAHKATKNTSLMGRKIAKDTPVMVNIYAIQHNSEVFPEP…
Papaver_setigerum|Pse01G07650.0		MEGIQWTLLSIFVGVLIIWKRWFTKTMELPPGPRKLPVIGNLHQLNKGGELVHVTLAKMAQEHGKIMTVWFGGKQPSIVVSHHEAAWEVLVTKASDFSSRTLPYMSKFSSADWHTLATCNLGPFWQNLRKCLQTTTLNPHTFSAQVHLQEKDISNLILTFKEEASLNGGMVPLQRTTIQLIGRFCFGVEFEDKDGFVENIDAVMEETIRLSGHARLVDVFEFTRYIPGFRLLFKEAYELKHKIEETIRPYIRRYKSSTNCFLQFLLSQEDYSEEVVIFNLFEQFLLSTDSTSNATSWALAYLIHDEKIQQKVYAEVQELTGNGHSREEMITVEEVSKL
Papaver_setigerum|Pse01G07800.0		MVPLRRTTIQLIGRFCFGVEFEDKDGFVENIDAVMEETIRPSGHARLVDVFEFTRYIPGFRLLFKEAYELKHKIEETIRPYIRRYKSSTNCFLQFLLCQEDYSEEVVIFNLFEQFLLSTDSTSNATSWALAYLIHDEKIQQKVYAEVQELTGNGHSREEMITVEEVSKLKYVNAVVKEVLRMKPIAPLAVPHQAVCDSSLMGMKVRKGTPVMVNIYAVHYDPTVWVEPQRFMPERFLGALNDGGDKNKATLAMERSLIAFGAGRRICAGMDLAKLQFALTLANLVNSFRWSCVSEGKFPDLTEDLSFILRMKTPLVARIVPR
Papaver_setigerum|Pse01G10810.0		MEVTFWLITCGVVVAFALAKLLFGKKSSMSTMEWPSGPKTLPIIGNLHQLGGEAFHVCLANLAKVYGGVFTIWVGSWRPFIVISDVDKAWEVLVNKSSDYSARDMPDITKIISANWKNISHGDSGPFWHNLRKGLQGVALTPFNVASQYHLQERDMQNLIKSMKKKASQKNGILKPLDYVKEETVRLLSRLIFGQEFVDEDFVVGMHQALDELVSISGYASLADAFKFCENLPSHKKTIRAVHAIKIRFDNLIRPHIVSNPPTNTYLHFLLSQDFSEDVIISAILEVYDLGVDSTASTTVWALTFLVREQKIQEKLYREINNVTGGKRPVKVEDLNKLPYLQAVMKETMRMKPIAPMAIPHKASKDTSLMGKKINKGTVVMVNLYAIHHNPAVFPEPYK…
Papaver_setigerum|Pse01G12200.0		MEETFWLITCGVVVAFALAKFQFAKKSSLSTMEWPAGPKKLPIIGNLHQLGGEAFHVCMENMAKVHGSVFTIWLGGWRPFIVISDADKAWEVLVNKSSDYSARDMPDITKIISANWKNISHCDSGPFWHNLRKGLQSVALTPFNVASQYHFQERDMQNLIKSIYQKTLHKNGTLKPLDYVKEETVRLLSRLIFGQDLVDEDFVVGMHQALDEYIETISRASLADVFKFCENLPSHKKTIRAVHAIKKRIDSLIRPYIVSKPPTNTYLHFLLSQDFSEDVIISAIHEVYDLGVDATSLTTVWALTFLVREQKIQEKLYREIQNVTGGERPVKVEDINKLPYLQAVMKETMRMKPVAPMAIPHKALKDTSLMGKKINKGTVVMVNLYAIHHNPDVFPEPYK…
Papaver_setigerum|Pse01G43190.0		MVWPTGPKTLPIIGNMHVLGGTALQVVLHNLAKIHGNVMTIWIGSWRPVIVVSDIDRAWEVLVNKSSDYSARDMPEITKIISADWKTISTSDSGPGWSNLRKGLQNVALSPHNLAAQSQFQEKDITKMIQSLKKEAASNNGIVKPIDHLKKATLRLISRLIFGQDFDDDKYVDDMHHAIEELIRVSGYAQLAEAFYYAKYLPSHKKAVRDVEEANQRVKKLVRPFLSLNPPTNTYLHFLNSQKYDEEVIIFAIFEAYLLGVDSTSLTTAWALAFLIREPVVQDKLYQELKNLTAKNDCEIVKVEDLNKLQYLQAVLKETMRMKPIAPLAIPHKACRDTSLKGNKIDQGTRVMVNIYALHHNEKVWKEPFKFMPERFLQTQDVVNGKAMEQSLLPFSAGM…
Papaver_setigerum|Pse01G43230.0		MEETFWLVTCGVVVAFALAKLLFGKKSSLSTMEWPAGPKTLPIIGNLHQLGGEAFHVCLANLAKVYGGVFTIWVGSWRPFIVISDVDKAWEVLVNKSSDYSARDMPDITKIISANWKNISHGDSGPFWHNLRKGLQGVALTPFNVASQYHLQERDMQNLIKSMTKKASQKNGILKPLDYVKEETVRLLSRLIFGQDFVDEDFVVGMHQALDELVSISGYASLADAFKFCENLPSHKKTVRAVHAIKIRFDNLIRPHIVSNPPTNTYLHFLLSQDFSEDVIISAILEVYDLGVDSTASTTVWALTFLVREQKIQEKLYREINNVTGGKKPVKVEDLNKLPYLQAVMKETMRMKPIAPMAIPHKASKDTSLMGKKINKGAVVMVNLYAIHHNPAVFPEPYK…
Papaver_setigerum|Pse01G46020.0		MEGIQWIILSILVGALMILCKSWFTKTMELPPGPRKLPVIGNLHQLNKGGELVHVTLAKMAQQHGKIMTVWFGGQQPSIVVSHHDAAWEVLVTKASDFSSRTLPYMSKFSSADWYTLATCNLGPFWQNLRKGLQTTTLNPHTFSAQVHLQEKDISNLILDLKEEASLNGGIVKPMIPLRRTTIQLIGRFCFGAEFEDKDGFVENIDTVMEETIRLSGHARLVDVFEFTRYIPGFRLLFKEAYELKRKIEETIRPYIRRYKSSTNCFLQFLLSQEDYSEEVVIFNLFEQFLLSTDSTSNTTSWALAYLIHNEKIQEKVYEEVQELTRSGRSREEMVTIEEVSKLKYVNAAVKEVLRMKPIAPLAVPHQAVCDSNLMGMKVRKGTPVMVNIYAVHYDPTVW…
Papaver_setigerum|Pse11G06520.0		MEETFWLITCGVVVAFTLAKLLIGKKLSLSTMEWPAGPKKLPIIGNLHQLGGEAFHVCMANLAKVHGSVFTIWLGSWRPFIVINDVDKAWEVLVNKSSDYSARDMPDITKIISANWKNISHCDSGPFWHNLRKGLQSVALTPFHVASQYHLQERDMQNLIKSIQEKTSHQNGTLKPLDYIKEETVRLLSRLIFGQDLVDEDFVVGMHQALDEYIETISKASLADVFKFCENLPSHKKTIRAVHAIKKRIDSLIRPHIVSKPPTNTYLHFLLSQDFSEDVIISAIHEVYDLGVDATSLTTVWTLTFLVREQKIQEKLYRETQNLTGGERPVKVEDVNKLPYLQAVMKETMRMKPIAPTAIPHKALKDTSLMGKKINKGTVVMVNLYAIHHNPDVFPEPYK…
Papaver_setigerum|Pse11G07550.0		MEKTIFSNSWILTTSTLVAITIITMLTVFKRKKSSTMVWPTGPKTLPIIGNMHVLGGTALQVVLHNLAKIHGNVMTIWIGSWRPVIVVSDIDRAWEVLVNKSSDYSARDMPEITKIISADWKTISTSDSGPGWSNLRKGLQNVALSPHNLAAQSQFQEKDITKMIQSLKKEAASNNGIVKPIDHLKKATLRLISRLIFGQDFDDDKYVDDMHHAIEELIRVSGYAQLAEAFYYAKYLPSHKKAVRDVEEANQRVKKLVRPFLSLNPPTNTYLHFLNSQKYDEEVIIFAIFEAYLLGVDSTSLTTAWALAFLIREPVVQDKLYQELKNFTVKNDREIVKVEDLNKLQYLQAVLKETMRMKPIAPLAIPHKACRDTSLMGKKIDQGTRVMVNIYALHHNEK…
Papaver_setigerum|Pse11G07600.0		MEWPAGPKTFPIIGNLHQLGGEAFHVCLENLAKVYGGVFTIWVGSWRPFIVISDVDKAWEVLVNKSSDYSARDMPDITKIISANWKNISHGDSGPFWHNLRKGLQGVALTPFNVASQYHLQERDMQNLIKSMKEKASQKNGILKPLDYVKEETVRLLSRLIFGQEFIDEDFVVGMHQALDELVSISGYASLADAFKFCENLPSHKKTIRAVHAIKIRFDNLIRPHIVSNPPTNTYLHFLLSQDFSEEVIISAILEVYDLGVDSTASTTVWALTFLVREQKIQEKLYREINNRTGGKRPVKVEDLNKLPYLQAVMKETMRMKPIAPLAIPHKASKDTSLMGKKVNKGTVVMVNLYAIHHNPAVFPEPYKFMPERFLKDANSDGSLGDIKKMEGSLLAFSA…
Papaver_setigerum|Pse11G08050.0		MDENSLFIFAGTVKIVLAFAKFLALRKSYPTGTEWPAGPKTLPLIGNLHQLCGDLFHVVLANLAKVHGGVFTIWLGSWNSVIIVSDVNSAREVLLTKSSDYSARNYPGYLTILSEERDMQNLIKSMQQNASRENGISRPLDYVKKEAIRLLSRIIFGQDFPNDEDFIVGIHHTVHHLISIGGFANLADAFKIGEYVPRHIRYIRGLNDVGEQAAKLILPHIVASKPPTNCYLHFLKSQDFSDDVIVSFILEVYGFATHSIAATIVWALTYLVREPKIQEKLYQEIKDVTGGARPVKTADLNKMSYLKAVMKETIRMKPLGPMTIAHKATKNTSLMGRKIDKGTPVMVNIYAIQHNSEVFPEPYKFMPERFLKDVNSDGSLGDIETMERSYLAFGAGMRV…
Papaver_setigerum|Pse11G10260.0		MDENILVIIAGTVIILALATFILVSRKSSPSAMEWPAGPRTLPIIGNLHQLRGDLFHVVLANFAKVHGGVFTIWIGSWSPVIIVSDVNSAREVLVTKSSDYSGRIVPDYLKIVSADGESIADSDSGPFWHNLRKGLQNVALNPTSVMSQSHLQERDMQKLIKSMQENASRENGILKPLDYVKKETVRCISRIIFGKDFSNEDFFVAMTQTVHNLVRIGGFASLADAFKVGEYLPSHKKFIGDLNAISAHAANLILPYIESNPPVNTYLHFLTSQDYSEDVIISAILEIYGLAADSCATTIVCALTFLVREQEIQEKLYCEIKNTTGGTRPVKIADLKKMQYLQAVVKETLRMKCIGPMAIPHKSTRNTSLMGKKIDKGTQVMVNLYAIHHNPEVFLEPH…
Papaver_setigerum|Pse11G12280.0		MDENSLFIIAGTVIIVLAFAKFLALRKSYPPGTEWPAGPKTLPLIGNLHQLWGDLFHVVLANLAKVHGGVFTIWLGSWNPVIIVSDVNSAREVLLTKSSDYSARNYPGYLTILSEGNDSINGSDCGPFWHNLRKGLTSGALNPLNVTSQSHLQERDMQNLIKSMQENALRENGILRPLDYVKKEAIRLLSRIIFGQDFPNDEDFIVGIHHTVHHLISIGGFANLADAFKIGEYVPRHIRYIRGLNDVGEQAAKLILPHIVASKPPTNSYLHFLKSQDFSDDVIVSLILEVYGFATDSIAATIVWALTYLVREPKIQEKLYQEIKDVTGGARPVKIGDLNKMSYLKAVMKETIRMKPLGPMAIAHKATKNTSLMGRKIDKGTPVMVNIYAIQHNSEVFPE…
Papaver_setigerum|Pse15G00640.0		MAPINIEGNDFWMIACTVIIVFALVKFMFSKISFYQSANTTEWPAGPKTLPIIGNLHQLGGGVPLQVALANLAKVYGGAFTIWIGSWVPMIVISDIDNAREVLVNKSADYSARDVPDILKIITANGKNIADCDSGPFWHNLKKGLQSCINPSNVMSLSRLQEKDMHNLIKSMQERASQHNGIIKPLDHAKEASMRLLSRVIFGHDFSNEDLVIGVKDALDEMVRISGLASLADAFKIAKYLPSQRKNIRDMYATRDRVYNLIQPHIVPNLPENSFLHFLTSQDYSDEIIYSMVLEIFGLGVDSTAATAVWALSFLVGEQEIQEKLYREINNRTGGKRPVKVVDLKELPYLQAVMKETLRMKPIAPLAVPHVAAKDTTFKGRRIVKGTKVMVNLYAIHHD…
Papaver_setigerum|Pse16G13120.0		MEETIWLITCGVVVALAFAKMLFGKKSSLSTMEWPSGPKKLPIIGNLHQLGGGEAFHVCLANLAKVHGSVFTIWVGSWRPFIVISDVDKAWEILVNKSSDYSARDMPDITKIISANWKNISHCDSGPFWHNLRKGLQSVALTPFNVASQYHLQERGMQKLIKSMQEKASLRNGILKPLDYVKEETVRLLSRLIFGQDFVDEDFVVGMHQALDELVSISGYASLADAFKFCENLPSHKKTIQAVHAIKKRFDTFIRPHIVSKPPTNTYLHFLLSQDFSEDVIISAILEVYDLGVDSTASTTVWALTFLVRDQKIQEKLYREIKSVTGGKRPVKVEDLNKLPYLQAVMKETMRMKPIAPMAIPHKASKDTSLLGKKINKGTVVMVNLYAIHHNPDVFPEPY…
Papaver_setigerum|Pse16G13160.0		MKEMFSSSLVLITSTTMVVITTITMLLIFARKKSSTMEWPTGPKTLPIIGNMHILGGTALQVVLHNLAKIHGNVMTIWIGSWRPVIVVSDIERAWEVLVNKSSDYSARDMPEITKIISADWKTISTSDSGPAWSNLRKGLQNVALSPHNLAAQSQFQEKDITKMIQNLKKEAASNNGIVKPIDHLKKATLRLISRLIFGEDFDNDKYVDNMHHAIEELIRVSGYAQLAEAFYYAKYLPSHKKAVRDVEEANQRVKKLVRPFLSLNPPTNTYLHFLNSQNYAEEVIVFAIFEAYLLGVDSTSLTTAWALAFLIREPVVQDKLYQELKTFAAKNDRDIVKVEDLNKLQYLQAVLKETMRMKPIAPLAIPHKACRDTSLKGNKIDQGTRVMVNIYALHHNEK…
Papaver_setigerum|Pse20G36210.0		MENFWFIISGTVIVVTALAKFLLDKRYSPSPTEWPAGPKTLPIIGNLHQLGGDVFHVVLENLAKVHGGIFTIWIGSWNPVIVISDVDVAWEVLVSKSSDYSARHVPDYQKDISASGKNISESDTGPFWINLRKGLQGVALSPINIMSQTHLQETSMHHLIKSMQQKALQQNWILKSLDYVKEESIRLLSRLIFGQDFADEDFVVGMNHGLHDLVRIGGFASLADAFKIGEWLPSTKKVIRELGVVGEQVKNLVLPHITSTPPTYTYLHFLKSQGYNEDIIVTAIIEVYSLGADSTAEAIVWALTFLVREPKVQEKLYKEINKVTGGNRPVQVRDLKKLPYLQAVMKETLRMKPIGPMAAPHQALRKTSLLGKKVDKGTQVMVNLHAIHHNYNVFPEPYK…
Papaver_setigerum|Pse20G36220.0		MAPIKEEINDFWVIACTVIVTFALVRFLFSKISSQSANTTEWPAGPRKLPIIGNLHQLRGGGQPFQVVLANLDKVYGGAFTVWVGSWSPTIIVSDADHAREVLINKSSDYSARDVPDRLKIVTANGKNISDSDAGPYWHNLKRGLQSVALNPRNVIRLVFGQDFSNEDYIIDMKHTLDELVRISGFASLADAFKYAEYLPSHRKSVQDMYAIKERVHNLIQPHMVSNPPANSYLHFLASQDYSEEIIVSAILEVYGLGVDSTASTAVWTLSLLVCEQKIQEKLYCEINNLTGGKRPVKVADLKKLPYLQSVMKETFRMKPIAPMAIPHKATKDTTLMGRKIDKGTTVMVNLYAIHHDPRVFPEPYKFMPERFLKDVNGDGSFGDISTMERSLFAFSAGM…
Papaver_setigerum|Pse20G36550.0		MEWPAGPKKLPIIGNLHQLGGGSPFQVVLANLAKVYGGVFTIWVGSWAPMIIISNIDYAREVLVNKASDYSARDVPDRLKIVTANGKNISDSDSGPYWHNLKKGLQSVALNPPNVMSLSHLQEKDMQNLIKSMQEKASQNNGILKPLDYVKEESIRLLSRLVFGQDFSNENFVIGMKHTLDDLVRISGFASLADAFKIAEYLPSHRKSIREMYAVKEKIHNLIHPHIIATPPANTYLHFLISQDYSEEVVVSAILEVYGLGVDSTASTAVWALSFLVREQEIQEKLYREINYLTGGKRPVKVADLKALPHLQAVMKETLRMKPIAPMAIPHKASKDTSLMGGKIDKGTTIMVNLYAIHHDPNVFPAPYKFMPDRFLKDVNIDGIFGDINKMESSLLAFS…
Papaver_setigerum|Pse22G27000.0		MKWPAGPKTLPIIGNLHQLGGDLFHVVLANLAKVHGGVFTIWMGSWNPVIIVSDVNSAREVLISKSSDFSSRNVPDYLKIVSADGKSISESDCGPFWHGLRKGLQGVALNPLHVMSQSHLQERDMQNLIKSMQEDASKEDGVIQPLDYIKKDAIRLLSRIVFGQDFSNEDFVVAMNHTLHNLVRIGGFASLADAFKLGEYLPSHKKFIRELNAVSEEAANLILPYIASKPSKNTYLHFLVSQEYNEDVIVSAVLEIFSMAADSTAATTVWALAFLVREQDIQEKLYREIKNVTGGNRPIQVADVKKMSYLQAVIKETLRMKTVGPMAIPHKASKDTSLMGRKIDKGTQVMVNLYSIHHNSDVFPKPHKFIPERFLKNVNSDGSLGDREKMESSLLAFGA…
Papaver_setigerum|Pse22G26980.0		MEENFWFITVGTVIIVFALAKFLLPKKSFHTVANEWPAGPKTLPIIGNLHQLRGDDFHVRMANFAKVHGGIFTIWVGSWHPVIIINDIASAWEVLVTKSSDYSSKYKPDSYLKDVNSSGNEKYTNIAESDVGPFWSNLRKGLQSVALGPLNVTSQTHLQERSMHRLIKSMQQKALQQNGILKPLDYLKEESIRLLSVLIFGQDFSDENFVIRMNRILYDLVRIDQITSLSDAFHIAKYLPSSKKVIRELDDVMEQAASLIIPYIRTSKTPPANTYLHFLKSQDYSEEVIVSSIIEVYTLGVDSTSEAIVWALTFLVRDPKIQEKLYHEIKNVTGGNRPVEVNDLKKMSYLQAVMRETLRMKPIGPVIFTHEAAKDTSLMGKKVGKGTRIMVNLRAIHYN…
Papaver_setigerum|Pse05G00060.0		MEEKFWLITGTLIFVFPLAKFLVTKKCFTCGMEWPAGPRKLPIIGNLHQLGAGDLFHVWLAKLAKVHGGVFTIWVGSWHPVIIVSDINNAREVLVNKSSSYSARELVDRLKIITADGKTVSESDSSPYWHKLKKGLQNVALTPLNVMSQSHLEEEGMKNLIISMKENASQENGILKPLDYVKEESIRILSRPIFGQDFSNENFVVGMCHILEELSHIGEIVSLADAFKIAEYLPSFKQSMRQLHAVKERIQNLIRPLMVSNPPTNTYLHFLSSQDYSEDLIVCAILEVYLLGVHSTAGTIVWALTFLVCEQKIQEKLYREIKNVIGGTTRPVKVT
Papaver_setigerum|Pse07G42570.0		MGETFWLITCGVVVAFALAKLLFGKKSSLSTMEWPAGPKTLPIIGNLHQLGGEAFHVCLANLAKVYGGVFTIWVGSWRPFIVISDVDKAWEVLVNKSSDYSARDMPDITKIISANWKNISHGDSGPFWHNLRKGLQGVALTPFNVASQYHLQERDMQNLIKSMKEKASQKNGILKPLDYVKEETVRLLSRLIFGQEFVDEDFVVGMHQALDELVSISGYASLADAFKFCENLPSHKKTIRAVHAIKIRFDNLIRPHIVSNPPTNTYMHFLLSQDFSEEVIISAILEVYDLGVDSTASTTVWALTFLVREQKIQEKLYREINNVTGGKRPVKVEDLNKLPYLQAVMKETMRMKPIAPMAIPHKASKDTSLMGKKINKGTVVMVNLYAIHHNPAVFPEPYK…
Papaver_setigerum|Pse07G42600.0		MVWPTGPKTLPIIGNMHVLGGTALQVVLHNLAKIHGNVMTIWIGSWRPVIVVSDIDRAWEVLVNKSSDYSARDMPEITKIISADWKTISTSDSGPGWSNLRKGLQNVALSPPNLAAQSQFQEKDITKMIQSLKKEAASNNGIVKPIDHLKKATLRLISRLIFGQDFDDDKYVDDMHHAIEELIRVSGYAQLAEAFYYAKYLPSHKKAVRDVEEANQRVKKLVRPFLSLNPPTNTYLHFLNSQKYDEEVIIFAIFEAYLLGVDSTSLTTAWALAFLIREPVVQDKLYQEIKNFTVKNDREIVKVEDLNKLQYLQAVLKETMRMKPIAPLAIPHKACRDTSLKGNKIDQGTRVMVNIYALHHNEKVWKEPFKFLPERFLQTQDVVNGKAMEQSLLPFSAGM…
Papaver_setigerum|Pse07G43650.0		MEETFWLITCGVVVAFASAKLLFDKKSSLSTMEWPAGPKKLPIIGNLHQLGGEAFHVCMANLAKVHGSVFTIWLGGWRPFIVISDADKAWEVLVNKSSDYSARDMPDITKIISANWKNISHSDSGPFWHNLRKGLQSVALTPFNVASQYHLQERDMQNLIKSIQEKTPHQNGTLKPLDYVKEETVRLLSRLIFGQDLVDEDFVVGMHQALDEYIETISRASLADVFKICENLPSHKKTIRAVHAIKKRIDSLIRPHIFSKPPTSTYLHFLLSQDFSEDVKISAIHEVYDLGVDATSLTTVWALTFLVREQKIQERLYREIQNVTGGQRPVKVEDVNKLPYLQAVMKETMRMKPIAPMAIPHKALKDTSLMGKKINKGTVVMVNLYAIHHNPDVFPEPYK…
Papaver_setigerum|Pse08G45720.0		MFSKISFYQSANTTEWPAGPKTLPIIGNLHQLGGGVPLQVALANLAKVYGGAFTVWIGSWVPMIIISDIDNAREVLVNKSADYSARDVPDILKIITANGKNIADCDSGPFWHNLKKGLQSCINPSNVMSLSRLQEKDMQNLIKSMQERASQQNGIVKPLDHAKEASMRLLSRVIFGQDFSNEDLVIGVKDALDEMVRISGLASLADAFKIAKYLPSQRKNIRDMYATRDRVYNLIQPHIVSNLPANSFLHFLTSQDYSDEIIYSMVLEIFGLGVDSTAATAVWALSFLVCEQEIQEKLYREINNLTGGQRPVKVVDLKELPYLLAVMKETLRMKPIAPLAVPHVAAKDTTLKGRRIVKGTKVMVNLYAIHHDPNVFPAPYKFMPERFLKDVNSDGRFGD…

## Sheet: Supplementary Table 8
Supplementary Table 8. The homologous gene sequences of characterized CYP80 genes in 245 species.
gene id	rename	sequence
Akebia_trifoliata|GWHPBISH000785		MEDWVWSLFVLSTICLSTVLLRRMLDKKSRKLPPGPRGWPIIGNLFDLGNVPHKTLANLHPKYGPVMFLHLGAMKNVVIQSAEAAKEMFKNHDISFAGRTIIETMRVHNYNQGSLAVAQYGPYWRMLRRICTTELFNNKRINETTFLRRESVDDMIRWIEEEAQVQGGVQVARFVFLMTFNLLGNLFFTRDLLDPQSKEGPEFFSTMDRIMKLHAKPNLADFFPLLRWLDPQGIRREMEQEIGRAMNIVSGFMKKRVHEQRSDEDKRKKDFMDVLMEFEGDGNEEPTKISEKNMVTLMLEMFLAGTETTSSTIEWAMTELLLNPKSMSKVRTELTQVVGSNMKFEESDINNLPYLQALVKETLRLHPPIPFLVPRRAVKDNFFMGYFIPKDTQVLVNAW…
Akebia_trifoliata|GWHPBISH000786		MFLQLGAVKNVVIQSAEAAREMFKNHDISFAGRTVIDTMRVHNYNQGSLAVAQYGPHWRMLRRICTTKLFCNTRINETTFLRRERVDDMIRWIEEEAQVQGETGGVQVAQFVFLMTFNLLGNLFFTCDLLDPQSKEGPEFFRTMDRIMKLFGEPNLADYFPLLRWLDPQGIRRKTEQEMERAMNIVSAFMKKRVHEQRLDEDKRKKDFMDVLLEFEGDGNEEPTKISEKNMVILMLEMFFGGTETTSSTIEWAMTELLRNPKSMSKVCTELTQVVGLNMKFEESDIDNLPYLQAVVKETLRLHTPAPFLVPRRAVKDNFFMGYFIPKDTQVLVNAWAIGRDPNSWDDPLSFKPERFLGSDIDYRGQHFEFIPFGAGRRICAGIPLAHRVVHLILGSLLH…
Akebia_trifoliata|GWHPBISH009749		MEDSIWSLIVVSTICFSTILLLHQILNKKSRKLPPGPRGWPIIGNLFDLGTSPHTTLANLHRKHGPVIHLRLGAMKTVVIQSAEAAKELFKNHDIIFAGRTVTETMRVHNYHHGSMAVAQYGPYWRMLRRICTEEIFSNKRINETAFLRREKVDDIIRWIEEEAQVGDNGVQVAHSVFLMTFNLLGNLFFSRDLLDPQSKEGFEFFSTMDRLIKLTGDHNLADYFPLLKWLDPQGIRMKAEQEMERAMNIVSGFMQKRVHKQEQSENKRRKDFLDVLMEFEGDGNEEPTKISDKNMVILMVEMFFAGTETTSSTIEWVMTELLRNPKSMSMVCTELTQVVGSNKKFEESDIDNLQYLPAVVKETLRLHPPVPFLIPRRAVNDNFFMGYLIPKDTQVFVN…
Akebia_trifoliata|GWHPBISH009750		MEVWIWSLIVVSTICFSAILLLHQILNKKSRKLPPGPRGWPIIGNLFDLGTSPHTALANLHRKHGPVIHLRLGAMKTVVIQSAEAAKELFKNHDISFADRTVTEAMRAHNYHHGSMAVAQYGPYWRMLRRICTAEIFSNKRINETAFLRREKVDDMIQWIEEEAQVEGDNGVQVAHSIFLMTFNLLGNLFFSRDLLDPQSKEGFEFFSTMDRIIKLTGDHNLADYFPLLKWLDPQGIRMKAEQELERAMNIVSGFMQKRVHKQEQSENKRRKDFLDVLMEFEGDGNEEPTKISDKNMVILMLEMFFAGTETTSSTIEWVMTELLRNPKSMSKVCTELTQVVGSNKKFEESDINNLQYLPAVVKETLRLHPPTPFLIPRRAVNDNFFMGYLIPKDTQVFV…
Akebia_trifoliata|GWHPBISH009751		MEDWVWSLFVLSTICLSTVLLLRRILDKKSRKLPPGPQGWPMIGNLFDLGNVPHKTLTNLHPKLIFLHLGAMKNVVIQSAKAAKEMFKNHDISFTGRTVIETMRVHNYNQGSLAVAQYGPYWCMLRRICTTKLFNNKRINETTFLRRERDSVCLSHDLQLAWQSFLTRDLLDPQSKEGPEFFSTMDRIMKLHAKPNLADFFPLLRWLDPQGIRREMEQEIGQTMNMVSGFMKKRVHEQRPDEDKRKKDFMDVLMEFEGDGNEEPTKISEKNMVTLMLEMFLAGTETTSSTIEWAMTELLLNPKSMSKFEESHIDNLPYLQALVKETLRLHPPNPFLVPRRAVKDNFFMGYFIPKDTQVLVNVWAIGRDPNSWDDPLSFKPERFLGSDIDYRGQHFEFIP…
Akebia_trifoliata|GWHPBISH012275		MNYSTILLWISFVWTCFHLLNCAARLRFKSSQSPRELPPGPFPLPIVGNLFKLGKEPHKSLAELAKTYGSLMTLKLGKILQNNDLDFSSRSIPANVRSLHIHHEYSMVWLPVSPAWRKLRKICNSHIFTPQRLDANQGIRHQKVNDLLTFIHEKSKSGHAVNIGQAAFVTTLNLLSNTMFSIDMAHLNSESVQEFKTLVSGVMEELGRPNLLDYFPVLRFIDPQGARGCLKTYFMKIDELFDEIINQRMGHNNLLDILLNLSQEKNLEFSHHHLKALLKDIFIAGTDTSSSTLEWAMTELLRHPKVMEKARMELKETINKDKIVEESDIARLPYLQAIIKETLRLHPPAPFLIPHKAETDVEISGFKVPKCAQVLVNVWTIGRDPDIWVKPTSFMPDRF…
Akebia_trifoliata|GWHPBISH012326		MNYTIFVLFIFFVGIICLRVLTSSTSGRKKSSPCKAPPGPLPLPLVGNLFKLGKKPHKSLSELANIYGPLMTLKLGSVTTIVVSSSSMAKEILRNHDQSFASRTIPDAVRSLNHHEFSVVWLPTSPTWRNLRKINNSQIFSTQRLDANQGLRRQKVNDLLDYIRDKSKIGEAVDIGKAAFVTTLNLLSNTMFSVDMAHLNSESAQEFKNLVWNMMEEAGRPNLADFFPMLQSIDPQGIRRRMESYNSKLDDVLDGIMNNKLSKSNDLIDNLLGLSQEKNFEFSRQHIKALLKDIFIAGTDTSSSTLEWAMTELLRHPNIMENAQSELEQNIGKNKPVEESDIAQLPYLQAIIKETLRLHPPAPFLIPRRAETEVKICGFTVPKHAQVLVNVWAIGRDPN…
Akebia_trifoliata|GWHPBISH012327		MNYTILVLFVSIVGICLHILISSTRGNKKSSHCKPPPGPLPLPLVGNLFKLGKKPHESLSELAKTYGPLLTLKLGSVTTIVVSSASMAKEILRNNDQSFSSRTTPDAVRSLNHHNFSVVWLPTCPTWRNLRKIYNLQMFTTQRLDANQGLRQQKVNDLLDYIHDISKTGEAVDIGKAAFVTTLNLLSNTMFSIDMAHFNSKSAQEFKNLVWKVMEEAGRPNLADYFPMLRSIDPQGIRRRMEGYFSKLDDVFDGIINQRLSKSNDLIDTLLDFSQENKVEFSQQHVKAFLKDIFVAGTDTSSSTLEWAMTELLRHPNIMENARLELEQNIGKNKPVEESDIARLPYLQAIIKETLRLHPPVPLLIPRRTETEVEICGFTVPKHAQVLVNVWAIGRDPNI…
Amborella_trichopoda|evm_27.model.AmTr_v1.0_scaffold00032.211		MEQVLWSTGACALSLLFCALALALMLLTGKRQSHLPPGPKGLPMVGSLHRLGSRPHEALAALAETHGSLMTLQLGFMTTVVVSSSEMAKEVLQKNDLVFGGRTVIEVLKMRSYPEGSLVWAQTGPRWRALRRICTTQLFTPQRLDSLQALRCQKVHEMVELIRQAEPAVDIGRAAFVTSMNIISNMIFSADMVNPNSGSAQEFRDVVWAIMEVAGAPNLADYFPMLKALDPQGLKGRCNKLFGRLHQFLNVKIDERLQSRERGGVDRGDFIDAILDSKQENGVDFSRSEILALLTVRHYPRLCYAENEKDLFVAGSDTSSTTVEWAMAELLRNPDKMAMANMELSRILGGPEHIMEELDISRLPYLQSVVKETWRFHPPVPLLIPHRADATVNVAGYIV…
Amborella_trichopoda|evm_27.model.AmTr_v1.0_scaffold00032.222		MYFCWEKLVPNKSGRLPPGPTGLPIVGSLHKLGAKPNEALTALARTHGPIMTLRLGFLTTVVVSSSDMAREVLQKNDQAFAGRVILDAVTVDSHHNFSIAWGQVGPYWRTLRRLCNTQLFTTQRLDALQALRHRKVHELLELVDQYSDARKAVHMGRMAFVTSLNLLSNMIFSSDMVDPQSESVGELKELIWSIMEGVGTPNIADYFPFLRPLDPQGIKRKNIVQVRRLHQLLNEKIDERVGARERGQPIYGDFIDVLLDYSDQESGSKFSRAGILAPLVDMYLAGSDTTATTLEWAMAELLHNPEKMAAAKQELKENIAGSMHTVQESDLGRLPYLQAVVKETLRLHPPVPLLLPHRADVTVKVSGYVIPEHTQVLVNAWAIGRDVQVWENPTAFIPE…
Nymphaea_colorata|Nycol.N00184.1.p		MASLIGDLIFWLSIVLSSTYLLNLITRKTRNLPPGPVGLPVVGSLLQLSGMPHEAFARLSKQYGPLMTVWLGSRATVVVSSAEMAEEVLHRQNQVFSGRIVADVATALEYDLHSFGFSQVGPRWQALRRISNSELFTPRRLDALKELREEKVRVLLQHVGEACADGRAIDISEYAFGTTLNLVSSTLFSQDLVDLDSESAGEFKSFMCEMLEINSRPNLCDYFPVLRWIDPQGLRRRNRRILTRVYALFDELIDKHVRAYEDAAAKGEPKKNEDFVDVLLQLTRDPNTGFTKENIRPMLLDLFIAGSETSATTLEWAMTELLRHPDKMAAARSEIKQTVGKGNFVKESDILHLPYLEAVMKETLRMHSPAPLLVPRRADSATKLAGYTIPQHTQVLVNA…
Nymphaea_colorata|Nycol.A00843.1.p		MDIILFLCAAVCIICMCLRSLRLASGSRLPPGPRGFPVFGNMFQLGSQARSHQGLAKLAAKYGPLMTLRLGCMRTVVVSSSGAAREMFKVNDLSLAGRTVYEAMKVDVAQSNNGSIITAQYGPSWRLLRRLCSREFFTSGQLNAMKTIRNNCMEDMVRFIREESEHGKKDVEVAKFVFFMNFNLLGNLMFSRNLVDPKSKEGNEFYALAAKIMEVVAEPNLADFLPLLKPFDLQRIRKKMHYYTEKAFEITAGFTRARIQASKSKEEREKGKKDFLDVLLNFKDGNGDELSSFSSESINALALEMFIAGTDTTTSVVEWALAELLHNPQIMNKLLDELSGVAGPDRGIEEADLESLPYLRAVVKETLRLHPPLPLMVPHRAMESCTMMGYEIPKHTQVL…
Nymphaea_colorata|Nycol.O02170.1.p		MPTTGREPRAGKLPPGPVGFPVVGSLFELGSMPNESLARLSEMHGPLMALQLGFITTVVVSSAEMAEQVLHKHDQAFAGRTVRDVVTVFDYHHHSLVFSQNGTRWRELRRICNMELFTPKRLDILAGVRQEKVQALLRHVHKACAAGHSVDIGLCAFGTTLNLVANTIFSMDVVDLESETAGGFKNLLWEILDLNAKPKLSDFFPALRWADPQCLRRRNTTLIKRLYDAFDQVIDKRMESDAAAKGGEKKKHGDLLEVLVELTREPSSGFTRENIRPLLTDVFIGGSDTTSTTIEWAMTELLRHPDKMSIAQLELKRTIGSERHVKESHIQHLPYLQSLVKETLRLHPPVPLLVPHSADVTTEVAGFTIRKNTQVLVNAWAIGPDPASWENATSFLPER…
Nymphaea_colorata|Nycol.B00179.1.p		MELEAWLPCLLVLLLFFVSSLLFFQGKDNLPPGPRGWPIVGNLFQLGSKPHATLSGLARTYGPLFSLRLGTQCVVVASSPSTAALVLKTHERSISARAVPQVCRYEEYLPYSIVWSDCNDSWKQLRAVCRSRLFSGKMLDSGARLRQQKVEEMVRRLRSSEGETVCIPDVVFSTIFSMMAASIFSDDAESATGNAEKMKRLACRVLELSTTPNFSDYFPAIAGLDVQGLRRESMACYKEVYDIWEGVIVERKKQKLQGGGKLDHDDFLGALLASGLSDLQIKACLFEMFIASTDTTTTTIEWAMAEFMKQPKIMAKLRKELFDTLSSTDTKVIDMEKKLKELPYFQSCIKETLRLHPVVPILPYRATDTCEGLGHTIPKGCQVWVNVWAIGRDPASWAE…
Nymphaea_colorata|Nycol.B00180.1.p		MEMEIWLSCCLLFLSLPLLFSVFLKRKDNLPPGPRGWPIVGNLFQLGSKPHAALASLARTYGPLFSLRLGTQRIIIASSASAAALVLKTHDLIISSRSAPQMCRFDEYLPYSMIWSDCNDSWKQFRATCRSLLFSNKMINGGASLRQQKVADMVGRLRSDEGKEVCISELVFGTIFGMMAASIFSNDAEGATGNTDKMKRVIRSVLELIFEPDVSDYFPAIGRLDVRGLRRKARGYCMEIYDVWEGIIVKRRKERMDGGAKVHQDFLDVLLSRELSDLQIKAHLLELFIGGIDATTATIEWAIAEFMKQPKIMAKLREELFDALSSRGTEDPDLEQKLKELPYFQACIKETMRLHPAVSLIPHCATETCEGLGYTIPKGCPVWVNVWAIGRDPASWVEP…
Nymphaea_colorata|Nycol.G00287.1.p		MIGDLIDSPIHLVVLIAALWALIWYFRRQNSRLPPGPSGWPLIGSLPALGAMPHHSISELAKRYGPILSLRLGTTTVVAACSASAAREFLKHNDANFLSRPSNAVSKHMPYGSHDMVWAEHGPRWRSLRKICAVHLFSNTALDDFRIVREKEVGILAASLARAGEVGEIVGVGEAVHLCIANVLGKVLIGRRLFEGGEDAREYREMVLEGMQLLGVFNIGDFVPSLEWMDLMGVAKKMKVHHRRHDGFMQRIMDEHAFSSLQGDFLSVLLRLKDDPVGLDGLDGKLTDIDIKALLTDLFTAGTDTSTSTVEWAIAELIKHPHVQKKVQAELDSVVGRDRLVKESDIPNLTYLQAIVKETFRLHPSTPLSLPRIASESCEVAGYHIPKGARLLVNVWAIS…
Nymphaea_colorata|Nycol.G00295.1.p		MIGDLIASPVHLVALLAALAAAIWYFRWRDSKLPPGPTGWPLIGSLPALGLMPHHSLAALAKQYGPIISLRLGTTTVVAACSASAAREFLKHNDANFSSRPPNAGAKHVAYDSQDMVWAEYGPKWRSLRKICAVHLFSNKALDDFRHVREKELGILAASLARAGENVGVGEALTVCTANALGKVLIGRRVFEGGEDAGEFRGMVLELMQLAGVFNIGDFVPSLDWMDLMGVAKKMKALHRRLDGFMQRILEEHGRSSGAGGQGDVLSVLLRLKDDPVGLDGQDGKLTDTDIKALLLDLFTAGTDTSASTVEWALAELIRHPHIQKKVQAELDSVVGRDRLVKESDIQNLPYLQAVVKETFRLHPSTPLSLPRIASESCQVAGYHIPKGTRLLVNVWAIS…
Nymphaea_colorata|Nycol.J00577.1.p		MTIRLGMKTVIVVSSAKMAEEVLHKHDRAFSGRSVAEAAKALDHYKHSMPWLPAGPRWRELRRACNTEVFASKRLDALRGLREKKVEELLQHVRAASADGCAVHIGRCAFVTALNIVSNTFFSKDVANLERGVAGQELKDLVWGIMEMAGRPNLADFFPPLRLVDPQGVRRAMTGYFQRMHELFDAMIDERLQAYAAASSVRTDDFLDVLLRLGGEPGSQYTVDVLKSLLLDMFVAGSDTTSSTIEWAMAELLHHPGKMAALRSELKKFIGDGRPVEAADIRQLAYLDAVVKETLRLHPPLPLLLPHRTEETVELCGHTIPGGTETIVNAWAIGRDPEVWEDPVSFSPERFVGSGTNYKGRDFKFIPFGAGRRICIGLPLVQRVVPLVVASLVHCFSWK…
Nymphaea_colorata|Nycol.J00569.1.p		MAELSTDLILWLCILLPSLYLFNLIIFRKTSKLPPGPVGFPVVGSLLELGRMAHESLARLSQLHGPLMALQLGFITTVVVSSAEMAEQVLHKHDQAFAGRSVRDVVTVFDYHHHSLVFSQHGTRWRELRRICNMELFTPKRLDMLAGARQEKVHALLRHVHKACAAGRPVDVGLCAFGTTLNLVANTIFSKDVVDLESESAGGFKNLLWEILDLNAKPNLSDLFPALRWADPQGMRRRNATLIKRLYDAFDQVIDKRMESDAPAHGGEKKKYGDFLEVLLALTREPSSGFTRENIRPLLTDLFIAGSDTTSTTIEWAMTELLRHPDKMSTAQLELKRTIGTERLVKESDIQHLPYLQALVKETLRLHPPVPLLIPHRADVTTEVAGFTVPKNTQVLVNA…
Nymphaea_colorata|Nycol.J00568.1.p		MAELSTGPILWLCTLPPSLYLFNLIIFRKTSKLPLGPVGFPVVGSLLELGRMPNESLTRLSQLHGPLMALQLGFITTVVVSSAEMAEQVLHKHDQAFAGRTVRDVVTVFDYHHHSLVFSQNGTRWRELRRICNMELFTPKRLDILAGVRQEKVQALLRHVHKACAAGHSVDIGLCAFGTTLNLVANTIFSKDVVDLESESAGGFKNLLWEILDLNAKPNLSDFFPALRWADPQCLRRRNTTLIKRLYDAFDQVIDKRMESDAAAKGGEKKKHGDLLEVLVELTREPSSGFTRENIRPLLTDVFIGGSDTTSTTIEWAMTELLRHPDKMSIAQLELKRTIGSERHVKESHIQHLPYLQSLVKETLRLHPPVPLLVPHSADVITEVAGFTIRKNTQVLVNA…
Nymphaea_colorata|Nycol.J00566.1.p		MAELSTDLVLWLFILLPFLYILNMIRFRKTSKLPPGPVGFPVVGSLFELGSMPNESLARLSEMHGPLMALQLGFITTVVVSSAEMAEQVLHKHDQAFAGRTVRDVVTVFDYHHHSLVFSQNGTRWRELRRICNMELFTPKRLDILAGVRQEKVQALLRHVHKACAAGHSVDSGLCAFGTTLNLVANTIFSKDVVDLESESAGGFKNLLWEILDLNAKPNLSDFFPALRWADPQCLRRRNTTLIKRLYDAFDQVIDKRMESDAAAKGGEKKKHGDLLEVLVELTREPSSGFTRENIRPLLTDLFIAGSDTTSTTIEWAMTELLRHPDKMSTAQLELKRTIGTERLVKESDIQHLPYLQALVKETLRLHPPVPLLIPHRADVTTEVAGFTIPKNTQVLVNA…
Nymphaea_colorata|Nycol.J00575.1.p		MPNESLARLSQLHGPLMALQLGFITTVVVSSAEMAEQVLHKHDQAFAGRTVGDAVKVLDYHHHSLVFSQNGERWRELRRICNTELFTPKRLDTLTGFREQKVQALLRHVHTACAAGRLVNIAECAFGTALNLVANTIFSQDVVDLESESTGEVKSIVWELLVLGAKPNLSDFFPALRWVDPQGLRRRTRTLLKRLYGVFDQLIDKRMESDAAANGGKKKKYGDFLEVLLELTRKPSSGFTRENIRPLLTDLFIAGSDTPSATIEWAMTELLRHPGKMSAVQLELERAIGTKRPVKESDIERLPYLQALVKETLRLHPPVPLLIPHRADVTTEVAGFTIPKNTQVLVNTWAISRDPACWENATSFLPERFLNSDINFKGKDFHFIPFGSGRRICPGMPLG…
Nymphaea_colorata|Nycol.J00578.1.p		MEFAFDLLLCSCIFLLCFFGFLFFPRKTNRRLPPGPVGLPFLGSLLELGNKVNESLYSLSKIYGPLMTIRLGMKTVIVVSSAKVAEEVLHKHDRDFSGRSVGEAAKTLDHYKHSMAWLPAGPRWRELRRFCNTEVFSSKRLDALRGLREKKVEELLQHVQAASADGCAVDIGRCALVTALNIVSNTFFSKDVANLEHGVAAQELKDLVGGIMETAGRPNLADFFPPLRLVDPQGVRRAMTGFFQRMHELFDAMIEERLQAYAAASSVRTDDFLDVLLQLGGKPGSEYTMDVLKSLFMDMFVAGSDTTSSTIEWAMAELLHHPGKMAALRSELKKFIGDGRPVEEADIPQLAYLDAVVKETLRLHPPLPLLLPHESEDTVELCGYTIPGGTQTIVNAWAI…
Nymphaea_colorata|Nycol.J00541.1.p		MAALCDLVPWVCILLSFVIFYNLISSKTSKLPPGPVGLPVVGSLFQVGDMPNESLAKLSKRYGPLMSLRLGLTTTVVVSSAEMAEEVLQKHDQDFAGRTILDAVNVCGCPESSIIMNQNCPRWREIRRVCNNELFAPKKLEAMRGLREEKVGVLLKHIHTASVAGRPVNIGQCVFKMALNLMSSTVFSEDVVDLESESMGEFQGLVWGLIEAARKPNVADYFPMLRLVDPQGLRRRVQTLLKQTDAILDELMEKRSQSHGAATEGWKKEREDFLDVLLRLVETPNSGFTRQNVKPIIMDLFVAGTDTSSITVEWAMTELLRHPNKMAAAQSEIKRTVGVDCVVQESDIPRLPYLQAVVKETLRLHPPAPLLMPHRADVTKRLGGFTIPKHTQVVVNAWA…
Nymphaea_colorata|Nycol.J00540.1.p		MAALCDLVVPCFCILLSFVTFYSLISRKTSNLPPGPVGLPVVGSLFQLGAKPYESLARLSKQYGPLMTLRLGLKTTVVVSSAGMAEEVLLKHDRDLAGRTGLDATNVFNYAESSIAMNQNCPRWRELRRLCNNEMFLPKRLDAMRGLREEKVQALLKHIQTASAAGRPVDIGKCTFSTALNLVSRTVYSEDVVDVESESAGEFKSLVWGLTQSVLKANIADYFPMLSLVDPQGIRRRNKALLKQMFAFLDELIDKRLQSCGAGEGWKKEGEDFLDVLLRLVATPSSGFTRQNIKPILSDIFIAGAETSSITVEWAMAELLRHPDKMAAARSELKQAIGIGRAVQESDIPRLPYLHAIVKETLRLHLPGPLLLPHRADVTVQVAGFTIPKHTQVLINAWA…
Nymphaea_colorata|Nycol.J00543.1.p		MRGLREEKVRVLLKHIHMASLAGRPVNISQCVFKMALNLLSSTVFSEDVVDLESESTGEFQGVLWGLIEAGRKPNVADYFPMLRLVDPQGLRRRVQTLLKQTDAILDELMEKRSQSHGAATEGWKKEREDFLDVLLRLVETPNSGFTRQNIKPIITDLFVAGTDTSSITVEWAMTELLRHPNKMAAAQSEIKQTVGIDCVVQESDIPRLPYLQAVVKETLRLHPPAPLLIPHRADVTKRVGGFIIPKHTQVVVNAWAIGRDASYWENPTSFTPERFISSNIDFKGKNFQFIPFGFIPFGAGRRMCVGMALGHRMVHLVLASLLQAFSWELPQGIEPERVNVDAKFGITLHKAVPLIVFPSPLMDM*
Nymphaea_colorata|Nycol.J00576.1.p		MGDFSNLIMWFCLLLPCVYLFRIISRKTSNLPPGPVGFPVVGSLFQLGDMPNESLARLSELYGPLMALRLGFRTTVVVSSPEMAREVLHTHDHAFAGRILMDVANNQFDYPKYSLVFNQNEAKWRELRRICISELFTPKRLDALRAVREQKVRALLQHIRTAFAARRPVDIGDRVFATVLNTVSNTLFSQDVVDLGSESAAGEFKSIVWGMLEAGAKPNLADFFPALRPFDPQGIRRQNDVLVKRLYAVFDEVIERRLESFGATEGRGSGGEGDDFLNVLLELDGKAESEVNRLAINAVLGDLFVAGSDTSTNTIEWAMTELLRHPDKMAKAQSELRETIGADRFVTESDISQLPYLEAVVKETLRLHPPTPLLLPHRAEATTEVAGFTIPKHTQVLVN…
Nymphaea_colorata|Nycol.J00539.1.p		MAALCDLVPYVCILLSFVIFYNLISWKTSKLPPGPVGLPVVGSLFQVGDMPNESLAKLSKRYGPLMSLRLGLATTVVVSSAEMAEEVLQKHDQDFAGRTTLDALNVCDYPESSIIMNQNCPRWREIRRVCNNELFAPKKLEAMRGLREEKVRVLLKHIHTASVAGRPVNIGQCVFKMALNLMSSTVFSEDVVDLESESTGEFQGVVWGLTEAATKPNVVDYFPILRFVDPQGLRRRVGTLMKQFHAVFDELIEKRSQSHGSEAEGLKKEREDFLDVLLRLVETPNSGFTRQNIKPILAQDLFVAGTDTSSIIVEWAMTELLRHPNKMAAAQSELKRTVGMDCLVQESDIPRLPYLQAVVKETLRLHPSAPLLMPHRADVTKRVAGFTIPKHTQVVVNAW…
Nymphaea_colorata|Nycol.J00539.2.p		MAALCDLVPYVCILLSFVIFYNLISWKTSKLPPGPVGLPVVGSLFQVGDMPNESLAKLSKRYGPLMSLRLGLATTVVVSSAEMAEEVLQKHDQDFAGRTTLDALNVCDYPESSIIMNQNCPRWREIRRVCNNELFAPKKLEAMRGLREEKVRVLLKHIHTASVAGRPVNIGQCVFKMALNLMSSTVFSEDVVDLESESTGEFQGVVWGLTEAATKPNVVDYFPILRFVDPQGLRRRVGTLMKQFHAVFDELIEKRSQSHGSEAEGLKKEREDFLDVLLRLVETPNSGFTRQNIKPILADLFVAGTDTSSIIVEWAMTELLRHPNKMAAAQSELKRTVGMDCLVQESDIPRLPYLQAVVKETLRLHPSAPLLMPHRADVTKRVAGFTIPKHTQVVVNAWA…
Nymphaea_colorata|Nycol.J00539.3.p		MAALCDLVPYVCILLSFVIFYNLISWKTSKLPPGPVGLPVVGSLFQVGDMPNESLAKLSKRYGPLMSLRLGLATTVVVSSAEMAEEVLQKHDQDFAGRTTLDALNVCDYPESSIIMNQNCPRWREIRRVCNNELFAPKKLEAMRGLREEKVRVLLKHIHTASVAGRPVNIGQCVFKMALNLMSSTVFSEDVVDLESESTGEFQGVVWGLTEAATKPNVVDYFPILRFVDPQGLRRRVGTLMKQFHAVFDELIEKRSQSHGSEAEGLKKEREDFLDVLLRLVETPNSGFTRQNIKPILADLFVAGTDTSSIIVEWAMTELLRHPNKMAAAQSELKRTVGMDCLVQESDIPRLPYLQAVVKETLRLHPSAPLLMPHRADVTKRVAGFTIPKHTQVVVNAWA…
Nymphaea_colorata|Nycol.I00749.1.p		MAAELSSLPLFAIAASVASFVLLRLLLASPFLRRRNWPGSPPGPIGVPILGYLPYLSDRLHEDLHKLSFKYGPLFSLNMGLRPAIVASSPAVAREMLKVKDSSFSSRTITEAVRTVTYDATSLVFVPYGSRWRTLRKILTTELFSSRSIEQLSPARRTQVDWMLRTMRRAGSRGEAVNLAESTFIVSANLVSNLVCSKNLFDPEKEGGKELKEMVWEILEVVGAPNLADLVPFLQVLDPQGLRRRVSKVVKRFDDFFEQLIDERMEERRRGAKANPEGRLDMLDVFLDYKSEKKDDELKEFSRVDIKGMLSDMFVAGTDTSSSTVEWGLTEILRKPEVHKKIMAELDQVVGTDRKVEETDIPKLTYLQAAVKETFRLHPGVPLLIPRRTNEDCEVAGYH…
Nymphaea_colorata|Nycol.I01368.1.p		MAVDICFFALAACICAYFLFPRKPTNLPPGPTGLPIIGSLLHLGRKPNESLFELSRRYGPIMCLRLGSRTTIVVSTAMAAEEVLQKHDQAFAGRTVVDAVRTPGHVEGSLVWNQQGPKWRELRRICNMEMFASRRLEASRGLREQKMRVLIDHIGAACAEGRPVDIGKCAFTTTLNLVSNSIFSQDVVDLGSESAGEFKSLVWDILEAAGTPNLADYFPALRVVDPQGLRRRITVSFQRLHAFFEEMIDRRLESYAAKGQKKDQDFLDALLQHVTHSAGKLTVNDFKPLLVDMFVAGSDTSSVTVEWAMAELMKHPEKMAVARSEILDAITCKGRTVEESDIPNLPYLQAVVKETLRLHPPVPLLIPHRADEEVEVGGFTIPKHAQVLVNEWGICRDSG…
Nymphaea_colorata|Nycol.I01595.1.p		MGMGWLAFSLFISLLFFFFSLRRRREENLPPGPRGWPIVGNIFQLGSKPHAALASLARTHGPLISLRLGTQRVVVASSPSAASLVLKTHDHSLSYRALPQGGKFPEYANHSLVWADCTDSWKQLRTICRTQLFSRKMVDDGANLRQQKVEEMVGRLRSTEGKATNVAEVVFDTIFDMLASCIFSEDAEAALGSVTKMKGLTRKLIGFVTKPNVSDYFPVVAGIDIQGIRRKSRAYTLQVYEVWEGILAKRKEQRGDGAVMVKDNDFLDVLLSSGFSDLQIKAVLLDMFFAGTDTTTTTVEWAMAALVKQPEVMTKLRRELSDALCCTSRADSTMYEKLRDLRYLQACIKESMRLYPPVPLLLPHRASETCPVLGYTIPKGCQVLVNLWAIGRDPTTWDD…
Nymphaea_colorata|Nycol.E00755.1.p		MANPLELFLWFVTFLACVYSFRLFSVKSSKLPPGPVGLPILGSLFQIGTKLNESLAELAKVYGPLMTLRLGFKTTVVVSSAEMAAEVLQKHDQAFAGRSVMDAASPFDHSKWALGLGQNGPRWREMRRICNSELLTPRRLDSLRGLREQKVQELLRHVREACQGGQAVNVGECSMTTALNSISNTLFSQDTMGLGSDSVTEFRALSLDLAIALGSPNISDFFPLLKYIDPQGIRRRAEVCIKRFYELLDEIIEKRNTLYSTSKVGKKGDFLDVLLELSTKPGSEFKKECVKPLLLEMFLAATDTSSSTIEWAMAELLLNPKKMEILRLELKQIIGEDRVVQETDIQQLPYLQAVVKETLRLHPPIPLLVPHRADATTKVGGFTIPKHTEVLVNAWAIGR…
Nymphaea_colorata|Nycol.E00755.2.p		MTHKAFSLLRKGRSVMDAASPFDHSKWALGLGQNGPRWREMRRICNSELLTPRRLDSLRGLREQKVQELLRHVREACQGGQAVNVGECSMTTALNSISNTLFSQDTMGLGSDSVTEFRALSLDLAIALGSPNISDFFPLLKYIDPQGIRRRAEVCIKRFYELLDEIIEKRNTLYSTSKVGKKGDFLDVLLELSTKPGSEFKKECVKPLLLEMFLAATDTSSSTIEWAMAELLLNPKKMEILRLELKQIIGEDRVVQETDIQQLPYLQAVVKETLRLHPPIPLLVPHRADATTKVGGFTIPKHTEVLVNAWAIGRDSAYWENPTAFLPERFLESDVNFKGKDFHFIPFGSGRRMCPGIPLAVRTVYLALAALIHSFEWKLPEGMSPEKLDVEEYFGLTMR…
Nymphaea_colorata|Nycol.E00752.1.p		MADPLELFLWFVTFFACVYSFRLLSVKSSKLPLGPVGLPIVGSLFQIGTKLNESLAEFAKEYGPLMTLRLGFKTTVVISSAEMAAEVLQKHDQAFAGRSVMDAASPFDHFKWSLGLGQNGPRWREMRRICNSELFTPRRLDSLRELREQKVQELLRHVREACQGGQAANVGECAVVTTLNSISNTLFSQDTMGLVSESVTEFRALVFDLASALGSPNISDFFPLLKYMDPQGIRHRSEVCIKRFYELLDEIIEKRSTLYSISKVGKKGDFLDVLLELSTKPGSEFKKECIKPLLLEMFLAGTDTSSSTIEWAMAELLLNPKKMEILRLELKQIIGEDRVVQETDIQQLPYLQAVVKETLRLHPPIPLLVPHRADATTKVGGFTIPKHTEVLVNAWAIGR…
Nymphaea_colorata|Nycol.E00756.1.p		MADLLNLFLWFVTFLACIYSFRLFSVKSSKLPPGPVGLPILGSLFQMGTKPHESLAELARVYGPLMTLRLGFKTTVVVSSAEMAAEVLQKHDQAFAGRSVMDAASPLDHSKWSLGLGQNGPRWREMRRICNSELFTPRRLDSLRGLREQKVQELLLHVREACRGGQAVNIGECAVVTTLNSISNTLFSQDTIGLGSESATEFRALLGDTASALGSPNISDFFPLLKYVDPQGVRRQAAVYIKRFYELFDEIIEKRNELYSTSKVEKKGDFLDVLLELSTKTGSEFKKECIKPLLLEMFTAGTDSGSSTIEWAMAELLLNPKKMETVRLELKQIIGKDRVVQETDIQQLPYLQAVVKETLRLHPPIPLLVPHRADVTTKVGGFTVPKHTEVLVNAWSIGR…
Nymphaea_thermarum|NYTH04274-RA		MEMGWLTFSLFISLLLFFLSLRRRREENLPPGPRGWPIVGNIFQLGSKPHAALASLARTHGPLISLRLGTQRVVVASSPSAASLLLKTHDHSLSYRALPQAGKFPEYANYSLEQRGDGAVMVKDNDFLDVLLSSGFSDLQIKAVLLDMFFAGTDTTTTTVEWAMAALVKQPEVMTKLRRELSDALCCTSRADSIMYEKLRDLAYLHACIKETMRLYPAVPLLLPHRASETCAVLGYTIPKGCQVLVNFWAIGRDPTIWDDPLTFRPERFIDSPNLDFKGADYELIPFGSGRRMCAGLPLAVRTLELILAALVHNFEWSLPYGADVGQLGMEEKFGLTLQREQPLQLIPKFTEHESEENLPPGPKGWPIVGSIFQLGSKPHAALASLARTHGPLISLRLG…
Nymphaea_thermarum|NYTH04280-RA		MFKACDGRRGLAARRSMMRWEGVIVERKKKQMDVGAQLHDDFLDVLLNDGLSDLQIKTWLLTAMDSMLWLACPLFVSLILCLFSTLRQGKDNLPPGPRGWPIVGNLFQLGSKPHATLATLARTYGPLFSLRLGTKRVIVASSPSAAALVLKTHDGTTSSRPIPQVTQFDLYSPYSFIWSDCTESWKQLKAICRTHLFSGKMINDGEGLRRQKVEEMVRRLRSSEGKEVHIPELLFATIFGMLAANIFSDDAERATGKTGKIKRLSRRMVELSTAPNISDYFPAIADLDLQGLRREAMACGKEMYDIWEGVIVERKKQRMEGRVKLHDDFLDVLLSTGLPDIQIKSWLLDMFVAGTDSTTTTVEWAMAEFIRHPEIMAKLRNELSDALSSSGTDVLSMEQ…
Nymphaea_thermarum|NYTH04222-RA		MNSVLWLACSLILPLILFFFSTLRQGKDNLPPGPWGWPVVGNLFQLGSKPHATLASLARTYGPLFSLRLGTQRVIVASSPSAAALVLKTHDRTMSSRPIPQASQFDLYSPYSFVWSDCTDSWKQLKTICRTHLFSGKMISDGEGLRRQKLEEMVRRLRSCEGKAVHIPELLFNTIFGMLAGNMFSDDAERATGKSSKIKRLARRMVELSTASNISDYFPAIADLDLQGLRRETMACCKELYDIWEGVIVERKKRRMEERVKVHDDFLDVLLSTGLPDLQIKSCLLDMFLAGTDSTTTTIEWAMTEFIRHPEIMAKLRNELSDALSSSGKDGLSMEQKLKQLPYFQACVKETLRLHPPAPLLPHRAADKCEGLGHTIPKGYLVWVNVWAIGRDPESWADP…
Nymphaea_thermarum|NYTH10097-RA		MPPCSSLACFLPHSTLLKQQTGLGFSTPSLSLLHLRSHCKELRKMADPLDLFLWFVTFLACIYSFRLFSIKSSKLPPGPVGLPILGSLRQMGTKPHESLAKLAQVYGPLMTLRLGFKTTVVVSSAEMAAEVLQKHDQAFAGRSVMDAASPLDHSKWSLGLGQNGPRWREMRRICNSELFTPRRLDSLRRLREQKVQELLLHVREACRGGQAVNVGECAVVTTLNSISNTLFSQDTIGLGSESATEFRALLGDTASAFGLPNISDFFPLLKYVDPQGIRRQAAVYIKRFYELFDEIIEKRNELYSTSKIGKKGDFLDVLLELSTKPGSEFKKECIKPLLLEMFTAGTDSGSSTIEWAMAELLLNPKKMEIVRLELKQIIGEDRVVQEADIQQLPYLQAVV…
Nymphaea_thermarum|NYTH22459-RA		MPHRADVTRRLGGFTIPKHTQVVVNAWAIARDASYWENPTSFLPERFISSNIDSKGKNFQFIPFGAGRRMCVGMALGHRMVHLVLASLLQAFSWELPQGIEPERVNVEAKFGITLHKAVPLIVFPSPLMDINLPQKTSNLPPGPVGLPVVGSLFQLGGKPYESLARLSKQYGPLMTLRLGLKTTVVVSSAGMAEEVLLKHDRDLAGRTGLDATKIFNYAESSITMNQNCPRWRELRRLCNNELFLPKRLDAMRGHREEKVQALLKHIQTASAAGRPVNIGKCTFTTSLNLLSRTVFSEDVVDVESESAGEFKSLAWELSQSVLKANIADYFPMLRLVDPQGIRRRSKALLKEMFDFLDKLIDKRLQSYGTGEGRKKESEDFFDVLLRLVATPSSGFTRQ…
Nymphaea_thermarum|NYTH22453-RA		MAAAQSELKRTIGTHHMVQESDIRLLPYLQAVVNETLRGRLMAREQARTDTSVMNRTSCLSCSSGLQSNDLKATSTCSSSPTAPSRCHYTSWWVHHPQVLVNAWAIGRDAMYWENPSSFSPERFIGSGIDFQGKNFQLIPFGAGRRMCIGMPLGHGMLLCSMPFLGSFPHGIESEELNVEAKFGIALQKAVPLNKKKKKKKKKKKKKKKIWLREYDLLTSLNKGPVGLPVVGSLLELGDMPNESLAKLSKRYGPLMSLRLGLTTTVVVSSAEMAEEVLQKHDQDFAGRIILDAVNACGSPELSIAMNQNCLRWRELRRVCNNELFAPKKLEAMRGLREEKVRELLKHIHTASVAGRPVNICRCVFKMALNLMSSIVFSEDVVDLESDSTGEFQGVVWGL…
Nymphaea_thermarum|NYTH22448-RA		MAALCDLVVPCFCILLSFVTFYTLISRKTSNLPSGPVGLPVVGTLLQLGAKPYESLARLSMQYGPLMTLRLGQKTTVVVSSAGMAEEVLLKHDRDLAGRTGLDATKVFNYAESSITMNQNCPRWRELRRLCNNEMFLPKRLDAVRGLREEKVQALLKHIQTASAVGRPVDIGKCTFSTALNLVSRTVFSEDVVDVESESAGEFKSLVWGLTQIVLKANIADYFPMLSLVDPQGIRRKNKALLKQMFAFLDQLIDKRLQSYGVGEGWKKESEDFLDVLLRLVATPTSGFTRQNIRPLLSDIFIAGAETSSTTVEWAMAELLRHPDKMAAARSELKQAIGIGRAVQESDIPRLPYLNAVVKETLRLHPPGPILLPRRADVTVQVAGFTIPKHTEVLINAWA…
Nymphaea_thermarum|NYTH30798-RA		MEIHPLVRAMAAELSSLPLFAIAASIASFLLLRLLLASPFLRRRNWPGSPPGPIGIPILGYLPYLSDRLHEDLHKLSFKYGPLFSLNMGLRPAIVASSPAVAREMLKVKDSSFSSRTITEAVRTVTYDATSLVFVPYGSRWRTLRKILTTELFSSRSIEQLSPARRTQVDWMLRTMRRAGSRGEAVNLAESTFIVSANLVSNLVCSKNLFDPEKERGKELKEMVWEILEVVGAPNLADLVPFLQVLDPQGLRRRVSKVVKRFDDFFEQLIDERMEDRRRGAKANPEGRLDMLDVFLDYKSEKKDDELKEFSRVDIKGMLSDMFVAGTDTSSSTVEWGLTEILRKPEVYKKIMAELDQVVGTDRKVEETDIPKLTYLQAAVKETFRLHPGVPLLIPRRTN…
Nymphaea_thermarum|NYTH36657-RA		MAVGIWFFALVMCICAYFLFPRKPTNLPPGPMGLPIIGSLLDLGRKPNESLFELSRRYGPIMSLRLGSRTTIVVSTAMAAEEVLQKHDQAFAGRTVVDAVRTPGHVEGSLVWNQQGPKWRELRRICNMEMFASRRLDASRGRREQKMRALIDHIGAACAEGRPVDIGKCAFATTLNLVSNSIFSQDVVELGSESAGEFKSLVWDILEAAGTPNLADYFPALRVVDPQGVRRRITVSFQRLHAFFDEMIDRRLESYAAKGQKKDQDFLDALLQHVTHSAGKLTVNDFKPLLVDMFVAGSDTSSVTVEWAMAELMKHPETMAVARSEILDAITCKGRSVEESDIPNLPYLQAVVKETLRLHPPVPLLIPHRADEEVEVGGFTIPKHAQVLVNEWGICRDSG…
Nymphaea_thermarum|NYTH40391-RA		MRQQERRRTFINKGKLQIRLMEFAFDLLLCSFIFLLCFFGFLLFPRKINRRLPPGPVGLPFLGSLLELGDKVNESLYSLSERYGPLMTLRLGTKTVIVVSSAKMAEEVLHKHDRAFSGRSVGEAAKALDHYKHSVAWISAGPTWRELRRTCNMEVFSPKRLDALRGLREKKVEELLQHVQAASADGCAVDIGRCALVTALNIVSNTFFSKDLANLERGVAAQELKDLVGGIMETAGRPNLADFFPPLRLVDPQGVRRAMTGYFQRMHDLFDAMIDERLQASSVRTDDFFDVLLQLGGEPGSEYTMDVLKSLLMDMFVAGSDTTSSTIEWAMAELLHHPGKMAALQSELRRAIGDGRPVEEADIPQLAYLDAVVKETLRLHPPLPLLLPHRSEETVELCG…
Nymphaea_thermarum|NYTH40394-RA		MWFCLLLPCAYLFRIIFRKTSKLPPGPVGFPVVGSLFQLGDMPNESLARLSKLYGPLMALRLGFRTTVVVSSPEMAREVLHTHDHAFAGRILMDVANNQFDYPKYSLVFNQNEAKWRELRRICISELFTPKRLDALRAVREQKVRALLQHIRTAFAARRPVDIGDRVFTTILNTVSNTLFSQDVVDLESESAAGEFKSIVWGMLEAGAKPNLADFFRRCGRIRRQNDVLVKRLYAVFDEVIERRLESFGATEGRGSGGEGDDFLNVLLKLDGKAESQVNRLAVNAVLADLFVAGSDTSTNTVEWAMTELLRHPEKMAKAQSELRETIGAGRFVTESDISQLPYLEAVVKETLRLHPPTPLLLPHRAEATTEVAGFTIPKHTQVLVNVWAIGRDPAYWEN…
Nymphaea_thermarum|NYTH40393-RA		MEFAFDLLLLCSCILLLCFFGFLLFPRKTNRRLPPGPVGLPFLGSLLQLGDKVNESLYSLSKRYGPLMAIRLGMKTVVVVSSANMAEEVLHKHDRAFSGRSVGEAAKALDHYKYSVVWLPAGPTWRELRRACNTDRPQAARRLARPTREEASADGCAVDIGLCAFVTALNIVSNTFFSKDVANLERGVAAKELKDLVWGIMETAGRPNLADFFPPLRLVDPQGVRRAMTGYFQRMHELFDKIIEERLQAYAAASSVQTDDFLDVLLQLGGEPGSEYTTDVLKSLFLDMLAAGSDTTSSTIEWAMAELLHHPGKMAALRSELEKFIGDGRPVEEADIPQLAYLDAVVKETLRLHPPVPLLLPHESEDAVELCGYTIPGGTQTIVNVWAIGREPQAWEDPV…
Nymphaea_thermarum|NYTH40660-RA		MTVPCGLVSWFWILSSFAILFCLVFKKSSKLPPGPVGLPVVGSLFQLGNMPNESLARLSKRYGPLMRLRLGLTTMVVVSSAEMAEEVLQKRDQDFAGRTIMDAANVFCHPESTITLNQNCPRWRELRRICKNELFAPKKLDAMRGLREEKVRALLKHIHTASTTGRRVNIGQCIFTMALNLISTTVFSEDVVDVESDSAGEFKSMVWGLLEAAAKPNIADYCPILRLVDPQGLRRRVGTLIKQLYAVFDELIEKRSQSHGSEKTEREDFLDVLLRLVETPNLGFTRQNIRPLLTDLFVAGTDTSSTTVEWAMTELLRNPDKMAAAQSELKRTIGTHRMVQESDLPLLPYLQAVVKETLRLHPPVPLLLPHRADVTTQVGGFTIPKHTQVVVNAWAIGRD…
Nymphaea_thermarum|NYTH46798-RA		MEMEIWLSCSLLFLSLPLLFSIFFKRKDNLPPGPRGWPIVGNLFQLGSKPHAALASLARTYGPLFSLRLGTQRIIIASSASAAALVLKTHDLIISSRSAPQMCRFDEYLPYSMIWSDCNDSWKQFRATCRSLLFSNKMINEGASLRQQKVADMVGRLRSDEGKEVCISELVFGTLFGMMAASIFSNDAEGATGNTDKMKRVIRSVLDIIFEPDISDYFPAIGWLDVRGLRRKVRGYCMEIYDVWEGIIVKRKKQRMDGGVKVHQDFLDVLLSRELNDLQIKAHLLELFIGGIDATPATIEWAMAEFMKQPKIMAKLREELFDALSSGGTEDPELEQKLKELPYFQACIKETMRLHPAVSLLPHCATETCEGLGYTIPKGCPVWVNVWAIGRDPASWVQP…
Nymphaea_thermarum|NYTH46799-RA		MELEAWLPCLLVLLLFFVSSVLFFQRKDNLPPGPRGWPIVGNLFQLGSKPHATLSSLARTYGPLFSLRLGTQCVVVASSPSTAALVLKTHERSISARAVPQVCRYEEYLPYSIVWSDCNDSWKQLRAVCRSRLFSGKMLDNGVSLRQQKVEEMVRRLRSSEGEKVCIPDVVFSTIFSMMAATILSDDAESATGNAEKMKRLACRVLELSTTPNVSDYFPAIAGLDVQGLRRESMACYKEVYDIWEGVIVERKKQKLQGGGKLDHDDFLGALLASGLSDLQIKACLFEMFIASTDTTTTTIEWAMAEFMKQPKIMAKLRKELFDTLS*
Nymphaea_thermarum|NYTH46782-RA		MRHMGSLCNGSCHRSPIHLIMLLAALWAVTWYFRWRNSRLPPGPSGWPLIGSLPALGAMPHHSIAKLAKRYGPILSLRLGTTTVVAACSASAAREFLKHNDANFLSRPPNVVSKHTAYGSHDMVWAEHGPRWRSLRKICAVHLFSNTALDDFRLVREKEVRILAASLARAGEVGETVGVGEALHLCIANVLGKVLIGRRLFEGGEDAGEYREMVLEGMQLLGAFNIGDFVPSLEWMDLMGVAKKMKALHRRHDGFMQRIMDEHACSSSVGLQGDFLSVLLRLKDDPVGLDGLNGKLTDIDIKALLSDLFTAGTDTSTSTVEWAVAELIKHPHVQKKVQAELDSVVGRDRLVKESDIPNLMYLQAIVKETFRLHPSTPLSLPRIANESCEVAGYHIPKGA…
Nymphaea_thermarum|NYTH46778-RA		MIGNLIAGPLHLVALLAALWAVVWYFRWRNSRLPPGPTEWPLIGSLLALGAMPHHSIAELAKRYGPILSLRLGTTTVVAACSASAAREFLKHNDANFLSRPRNAAAKHMAYDSHDMVFADYGPKWRSLRKICAVHLFSNKVLDEFRHVREKEVEIMAALLARDGKAGKIVGVGEALNVCMTNALGKLLLGRRVLEGGEDAGEFRGMVLEVMQLAGVFNIGDFVPSLEWMDLMGVAKKMKALHRRLDGFLQRILEEHACSSAAGGQDDVLSVLLRLKDDPVGLDGLDQKLTDTDIRALLFDLFTAGTDTSTSTVEWAIAELIHHPHVQKKVQAELDSVVGRDRLTYQIIFAGNCQADIPPTPSATLSIPHIANESCQVAGYHIPKGAPLLVNVWAISRDP…
Nymphaea_thermarum|NYTH44300-RA		MIGDLIASPIHLVALLAALAAAIWYFRWRDSRLPPGPTGWPLIGSLPALGAMPHHSLAALAKHYGPIISLRLGTTTVVAACSASAAREFLKHNDANFSSRPPNAGAKHVAYDSQDMVWAEYGPKWRSLRKICAVHLFSNKALDDFRHVREKEVGILAASLGRAGEAGESVGVGEALTVCTANALGKVLIGRRVFEGGEDAGEFRGMVLELMQLAGVFNIGDFVPSLDWMDLMGVAKKMKALHRRLDGFMQRILEEHCRSSGAGGQGDVLSVLLRLKDDPVGLDGLDGKLTDTDIKALLLDLFTAGTDTSASTVEWAIAELIRHPHIQKKVQAELDSVVGRDRLVKESDIPNLTYLQAVVKETFRLHPSTPLSLPRIASESCQVAGYHIPKDTRLLVNVW…
Nymphaea_thermarum|NYTH48638-RA		MADPLQLFLWFVTFLACAYGFRLFSVKSSKLPPGPVGLPIVGSLFQIGTKLNESLAELAKVYGPLMTLRLGFKTTVVVSSAEMAKEVLQKHDQFFSGRIVVEAVKPLDHYKWSLGFGQNGPRWRELRRICNSELFTPRRLDLMRGLREQKVQEMLLHVREACRGGQAVNIGECVVVTTLNSISNTLFSQDTIGLGSELVTEFRALLLNTTSALGSPNISDFFPLLKYMDPQGIRRRTTVYTKRLYELFDEIIQKRNALYSTSKVEKKGDFLDVLLELSTKPGSEFKKECIKSLLLEMFTAGTDTSSSVIEWAMAELLLNPKKMEILRLELKQIIGEDRVVQEADIQQLPYLQAVVKETIRLHPPVHLLVPHRADATTKVGGFTIPKHTGVLVNVWAIGS…
Nymphaea_thermarum|NYTH57725-RA		RSFSLILEFITCCNNSSTLDLHKFSEGYTATIFTNMDMILFLCAAVCILCMWLRLMRLASGSRLPPGPPGLPVFGNMFQLGSQARSHQGLAKLAAKYGPLMTLRLGCMRTVVVSSSGAAREMFKVHDLSLAGRTVYEAMKVDVAQSNDGSIITAQYGPSWRLLRRLCSREFFTSGQLNAMKTIRDDCMEDMVRFIREESGHGKKDVEVAKFVFFMNFNLLGNLMFSRNLVDPKSKEGNEFYALAAKIMEVVAEPNLADFLPFLKPFDLQRIRKKMHYYTEKAFEITAGFTRARIQASKSKEEGEKGKKDFLDVLLNFKGGNGDELSSFSSESINALALEMFIAGTDTTTSVVEWALAELLHNPQIMKKLLGELSGVAGPDRGIEEADLESLPYLRAVVK…
Annona_cherimola|Anche102Chr1g0044880.1		MYIDPTPPNETHIWEKFFPSLLRFLIKKPCENVKLMELAKTYGPLIRLHFGVVPMIMGSTPAAAMALLKEQDRILSSRSVFHTSNIKGFIEHSFIFNDCNDQWKLIRRLLRTELFSTKMLNAHAPVREAKVADLLHFLSRRSSSKQVGLPQAVDLYKLIYAVSLNALGGVIYSQDRWDVQGLQKASAECLERTNATWAGIVKERREISKDQHSDSKNDFLQMLIDSGFDDARIDALLLETFGPGSDTTTAVTVWAMAELMKNPSKMMKLREEVDRVIGRNKAVKDSDLPNLPYVHAVMKETLRMHPPLPFLIVHRASDTCEVLNYTISKGCQVSVNAHALGMDATSWPRPSSFQPERFLGSDVDYQGNDFHYIPFGAGRRMCPGAPMASRFIRLLLASL…
Annona_cherimola|Anche102Chr1g0045150.1		MTEETKQRTKQAKIPGAANKLPPGPSAWPIIGTQPRLPLQLHIEFYELAKTYGPLMRINFGVEPIVVGSDPLAAMGILKDQDRSLSGRFAPHSTRVKGYIENSMVWSDCDDNWKLVRKILKTELLTPKMLTAHAPVREAKVSDLLHFLKRNKEGQVVEFYPLMYAAVLNMLGGVIYSQDVCDYEDREADNDKLSLKCLIRQLMHIASAPNMADLYPILRRWDVQGLRKASRECVKHINRTWAGIVQNRRANKDHSKNDFLQMLIDSGFNDAQINTFLLEIFGPGSDTTTTALEWAMSQLMKNPSKMSKLQEEVDRVVGRNREVKDSDLPTLPYLHAVMKEALRLHPPVTFLLPHRAMETCEVMNYTIPKDTQVVVNMHAMSMDPTIWPDPLAFKPERFL…
Annona_cherimola|Anche102Chr1g0047100.1		MEAIFLALLLSLAAIALHLLLRDPRPKGLPPGPRPWPILGNLLQLGDMPHAQLAKLAQSYGHLFTLKLGVQTVVVASSPAAATEILKTHDRAFSGRYVFHNFRIENHIEHSMVWSECNDYWKMLRRVCRTELFSPKMIEMQAHLREEKVWEMVEHLRGREGEVVKITEIVFGTLFNIFGNMIYSKDVFDLADPSGGAIKGQIWRLMELGNSTNPADYYPILGELDLLGQRRAVADCLHQIYDVWNAILRERRKKKKEETDSSNHDFVHVLLEAKLNDHQINALLMEVFGAGTETSASTIEWALAELIKNPDIMAKLRSELDNVVGQRRMKETDIPSLPYLQACVKETLRLHPPTPLLLPHRALEDCSIFGYTIPKDCQVMVNAWAIGRDPKTWNNPTTF…
Annona_cherimola|Anche102Chr1g0047110.1		MEAIFLALLLSLAAIALHLLLRDPRPKGLPPGPRPWPILGNLLQLGDMPHAQLAKLAQSYGHLFTLKLGVQTVVVASSPAAATEILKTHDRAFSGRYVFHNFRIENHIEHSMVWSECNDYWKMLRRVCRTELFSPKMIEMQAHLREEKVWEMVEHLRGREGEVVKITEIVFGTLFNIFGNMIYSKDVFDLADPSGGAIKGQIWRLMELGNSTNPADYYPILGELDLLGQRRAVADCLHQIYDVWNAILRERRKKKKEETDSSNHDFVHVLLEAKLNDHQINALLMEVFGAGTETSASTIEWALAELIKNPDIMAKLRSELDNVVGQRRMKETDIPSLPYLQACVKETLRLHPPTPLLLPHRALEDCSIFGYTIPKDCQVMVNAWAIGRDPKTWNNPTTF…
Annona_cherimola|Anche102Chr3g0024940.1		MSMRSGAPHVELMKLARVHGSLMLVKFGMQPVIVASTQESAMEILRTHDKVFSGRFIPHSLRMKDHIKHSVVWTDCTDGWKNLRRIARTELFSTKMLDAHVHVRQKKVGEMVDYIRGKEGGEIKITEVVFGTLLNILGHVVFSKDVFTYGEKGDKVGMQKLIRDMLYIAASPNLADFYPFLGGLDLHGLLRACEDRLNKVIVLWKDAVKERRAHRDPSKHDFLEVLLANDFDDAQINAMFLETFGPGSETSSTTIEWAMAELLRHPEKMSKVQEELAREVGGSIVTESHLPRLPYLHACIKETMRLHPAAPFLIPHRSVEPCQVMGYSIPKDYQTLVNAYAIGRDPNAWEDPDAFSPERFLDSELDYYGNHMQFIPFGAGRRICIGMPLASRTIPLFLG…
Annona_cherimola|Anche102Chr3g0024950.1		MDLLLWILVPLVSLLLLLLHPLSRRNLPPGPYPWPIIGNLMSMRSGDPHVELMKLAQVHGPIMLLQFGMKPVIVASTQESAMEILRTHDKVLSGRFVPHSMRLKDHIKHSLVWADCTDGWKNLRRIARTELFSTKMLDAHVRVRQQKVGEMVDYIRRKEGGEIKITEVVFGTLLNILGHVVFSKDVFRYGEKGDEVGMQKLIRDMLYIAATPNLADFYPFLGGLDLHGLLRACEDRLNKVIDLWKDTVEERRARRDPSKHDFLEVLLANDFNVAQLNAMFLETFGPGSETSSTTVEWTMAELMKHPEKMSKVQEELAREVGGAGSILTESHLPRLPYLHACIKEAMRLHPAAPFLLPHRSVEPCQVMGYSIPKDYKILVNAYAIGRDPNAWEDPDVFSP…
Annona_cherimola|Anche102Chr3g0026960.1		MISIFGLSFLLLPLAFVFSLLIKQHKNLPPGPRPWPIVGNLLQLTDKPHVALARMARTYGPLISLRLGTRLLVAASSPSAAAQVLKTHDRLLCTRDIPHTYRILEYIPFSLAFAVHCDDRWKALRTVCRAELFTPRMLDAQTHVREKTVSDVVRFINRRKQGKELKVADMAFVAVYNMLGNVVFSRDVLPLPLGGDDGCQLIAASGLKHEISRILELGLAPNLADFYTMLAPLDIQGLNRAATAIYRKLCSIWHEFIEERRSVGGYDGLMKKDFLDVLLSAGYDDLSLKALISDMFVAGTDTSATLTEWTISELIRNPEAMKKVRDELGRVVGCRDRGEKNSVKESHLIHLNYLHACIKETLRLHPPAPLLLPRSAAETCEVMDYTIPKGSRVMVNVWA…
Annona_cherimola|Anche102Chr3g0027050.1		MISIFSLSFLLLPLAFVVSLLIKQHKNLPPGPRPWPIVGNLLQLTDKPHVALARMARTYGPLISLRLGTQLLVAASSPSAAAQVLKTHDRLLCTRDISHTYRILEYIPFSLAFAVHCDDRWKALRTVCRTELFTPRMLDSQTHVREKTVSDVVRFINRRKLGKELKVADMAFAAVYNMLGNVVFSRDVLPLPLGGDDDCQLIAASELKHEISRALELGLAPNLADFYPMLAPLDIQGLNRAATAMYRKLCSIWHEFIEERRAAGGYDGLKKKDFLDVLLSAGFDDLPLKALISDMFVAGTDTSATLTEWTMSELIRNPEAMKKVRDELGRVVGCRDRGEKNSVKESHLIHLNYLRACIKETLRLHPPAPLLVPRSAAETCEVMDYAIPKGSRVMVNVWA…
Annona_cherimola|Anche102Chr3g0041500.1		MDDFQEAFNQLVYNDFSPQQFEAQWSSFMEEYGLLDHEWLQLLYSKRSNAERRLQPSCERIFDSHGNLNASFTFSATSSTPTSLFSPTEVTATFQKLSTRTAPAPNRRQSPPTGQQAPCSFRPPSSEFRSPLLAKVRQPARGRSFVPICAAQVLKAHDRILSGRYLVDVVKSNGYPELSLVWSDCTEEWKNLRRICRMELFGPKMMQAQAVVREKKVSELVELLRRKEGDMVKLGELVFGTIFNVLGNLIFSTDVIDLGSPTGDAAGLKSLICKLLEVGSATNLADHFPILGGLDLFGHRKASEEHREAVFESWKHLIKERRERYGGGGDLNPRHDFLDILIGDGFSDDRINVLLLELFSAASDTTTSTVEWAMAELIKNQTFMDELRAELESVGNCND…
Annona_cherimola|Anche102Chr3g0041680.1		MEISTPLFLSVLLLALPLLCFLLLKSRPPSKNFPPGPPPLPIVGNLLQLGSKPHVHFAHLARNFGPLFSLRFGSQPVVVASSPSAAAQVLKAHDRILSRRYLVDVVKSNGYPELSMVWSDCTEEWKNLRRICRMELFGPKMMQAQAVVREKKVSELVELLRRKEGDMVKLGELVFGTIFNVLGNLIFSTDVIDLGSPTGDAAGLKSLICKLLEVGSATNLADHFPILGGLDLFGHRKASEEHREAVFESWKHLIKERRERYGGGGDLNPRHDFLDILIGDGFSDDRINVLLLELFSAASDTTTSTVEWAMAELIKNQTFMDELRAELESVGNCNDRGTLIREAHLPHLSYLNACVKETLRLHPPTPLLLPRRALEPCEVMNYTIPKNCQVMVNAWAIGR…
Annona_cherimola|Anche102Chr6g0046490.1		MELLATLSYAVLFWALMQILVVGIKRLKISKERLPLPPGPVPAPIVGSLFKLGNQPHKSLAELAKQYGPLMTVKLGQVITIVVSSSAIAQQVLQTYDESFSGRHVKDAVRGSQTSESSIAWSQPNERWRKLRAVCNTRIFTAARLAANEHLRRKKVEEMIAHVREQGLAGRAVNVGQVAFSTVLNLVWNTIFSDDLVDLSSQSAQEFKEIIWGVMEEGGRPNVVDYFPVLRSIDPQGIRRRFAVHAKKLHGILDEMIERRMSSSSTARHEGRNDFLNALLDQEANGSLKLGREDIKILLADLFVAGADTSSTTVEWAMAELLRSPGTMEKAKLEVKGVIGSGPEAGMLRESDVGRLPYLQAVVKETLRLHPPVPLFPRKTLRNVEICGYMIPKDTLVTV…
Annona_cherimola|Anche102Chr6g0046750.1		MELLATLSYAVLFWALMQILVVGIKRLKISKERLPLPPGPVPAPIVGSLFKLGNQPHKSLAELAKQYGPLMTVKLGQVITIVVSSSAIAQQVLQTYDESFSGRHVKDAVRGSQTSESSIAWSQPNERWRKLRAVCNTRIFTAARLAANEHLRRKKVEEMIAHVREQGLAGRAVNVGQVAFSTVLNLVWNTIFSDDLVDLSSQSAQEFKEIIWGVMEEGGRPNVVDYFPVLRSIDPQGIRRRFAVHAKKLHGILDEMIERRMSSSSTARHEGRNDFLNALLDQEANGSLKLGREDIKILLADLFVAGADTSSTTVEWAMAELLRSPGTMEKAKLEVKGVVKETLRLHPPVPLFPRKTLRNVEICGYMIPKDTLVTVNAWAIARDPDVWADAATFLPERFL…
Annona_cherimola|Anche102Chr6g0088650.1		MNYTWGSFLWVCLTWSCIHLLLFLYIQFQRRRSGLKDLPPGPSPLPIIGNLHELGQKPHHSLARLATAYGPIMSLRLGRVFTVVVSSVETAKQVLQINDKALSGRTVADAVRAHSYCDSTMAWQPTDSNWRKLRTLSNTEIFTTQRLDASQSLRRRKVEELIAHVGQHRLEGRAVDVGRAVFVTALNLLSNTIFSVDLVHLRSESAQEFKDVVHGIMEEAGRPNLADYFPLLRPLDPQGIRRRMTAHFAKLYEIFDKMIDERLLSRASASDQDGRKDDFLDVLLDQSQNDQLGRNDIRALLTEIFSAGSDTSSSTVEWAMAELLRHPKAMAKARAELIQTIGSGRQVQESDFSRLPYMQAVVKETLRLHPPVPLLIPRKAESSVRICGHAVPQGAQLFV…
Annona_cherimola|Anche102Chr6g0089330.1		MNYTWGSFLWVCLTWSCIHLLLFLYIQFQRRRSGLKDLPPGPSPLPIIGNLHELGQKPHHSLARLATAYGPIMSLRLGRVFTVVVSSVETAKQVLQINDKALSGRTVADAVRAHSYCDSTMAWQPTDSNWRKLRTLSNTEIFTTQRLDASQSLRRRKVEELIAHVGQHRLEGRAVDVGRAVFVTALNLLSNTIFSVDLVHLRSESAQEFKDVVHGIMEEAGRPNLADYFPLLRPLDPQRIRRRMTAHFAKLYEIFDKMIDERLLSRASASDQDGRKDDFLDVLLDQSQNDQLGRNDIRALLTEIFSAGSDTSSSTVEWAMAELLRHPKAMAKARAELIQTIGSGLQVQESDISRLPYMQAVVKETLRLHPPVPLLIPRKAESSVRICGHAVPQGAQLFV…
Annona_cherimola|Anche102Chr7g0047290.1		MAFLVILLVLLPLIYFFLRKSSSPKNLPPGPFAWPIIGTLLPKLKKQPHLELSKLAQTYGPLMLLKFGVEPVVVGSSHTAAMEILKDQDRVLSGRFAPHSTRIKGYIEHSMVWADCTDYWKLIRKICRTELFSTKMLDLQAPVREAKVADLIQFLRRKDGEVVKFADVIFGAILNVLGGLIFNKDVFDFDDKTDNNLGMKGMIRQLMILAAIPNLADLYPILGSSDFQGLRKASAVCVKQMNDSWAEIVKERRANDHSKNDFLQVLIDSGFNDAQIDALLLETFGPGSDTTASTIEWAMSELLRDPSKMMKVREELDRVVGRNRSVKESDLPHLPYLHAVTKETLRLHPPVTFLLPHRALETCEVMNYTVPSGCQLMVNTYAIGRDPKTWPSPLSFTPE…
Annona_cherimola|Anche102Chr7g0047710.1		MAFLVILLVLLPLIYFFLRKSSSPKNLPPGPFAWPIIGTLLPKLKKQPHLELSKLAQTYGPLMLLKFGVEPVVVGSSHTAAMEILKDQDRVLSGRFAPHSTRIKGYIEHSMVWADCTDYWKLIRKICRTELFSTKMLDLQAPVREAKVADLIQFLRRKDGEVVKFADVIFGAILNVLGGLIFNKDVFDFDDKTDNNLGMKGMIRQLMILAAIPNLADLYPILGSSDFQGLRKASAVCVKQMNDSWAEIVKERRANDHSKNDFLQVLIDSGFNDAQIDALLLETFGPGSDTTASTIEWAMSELLRDPSKMMKVREELDRVVGRKRSVKESDLPHLPYLHAVTKETLRLHPPVTFLLPHRALETCEVMNYTVPSGCQLMVNTYAIGRDPKTWPSPLSFTPE…
Sphagnum_magellanicum|Sphmag06G086800.1.p		MTQMLFTKRYFIEDDFYNNKHEEFNDFMTKLMHLGGTFNISDFVPYLKPFDLQGLIPQAREICMEMDQFFDKIIHDHMNEKHADGSKDLVDVLLSLPPMEDSGDKLDDNKIKAMLIDMLLGGVESSNTAIEWAFVELLKNPKIMKKLQDELDHVVGHERVVDEDDIPQLKYLQAVVKETFRLHPPLTLLIPHESMQDCEVGGYHIPAKTRIFINAWAIHRHPSTYDNPWDFNPERFVGSDVDLKGTNFELLPFGCGRRMCVGLPLGLITVQMGLARLLHSFIWKLPLGKNPQDIDMGEVFGVTAPKAISLQAIGIARLPLHIYATR*
Chimonanthus_salicifolius|Cs07g02888		MEVVFLCIFTAILLYVTLLKPFFRERINLPPGPKPWPIVGNLLQLGKMPHVTLATMARTYGPIISLKLGTQRFIVASSPAAAAEIFKKNDRITSARYIPQTYRSVNYIGYSLTFSFDYNERWKSLRSLCKAGLFTTKVLDLQAQTRAKKVSEMISSLFSKRGEVVNLGDKVFTAVFNVMGNAVFSRDVLNVEDEEGSILKHNFDKIVQLAFYPNVADFYPCFGWVDIQGLNREQEVFIKKIYGIWDEYIQERRKNGDERNTRHDFLSALLNSGCSDLQLKALISDMFVAGTDTTVVVIDWTMSELVKNPKAMQKACIKESLRLHPPTPLLVPRQALEDCEVLNYTIPKESKVMVNAWAMGRDPKIWNDPSTFSLERFLNSNLDYKGNDFEFIPFGARRR…
Chimonanthus_salicifolius|Cs10g01707		MDEELLLFLLLLALFYTLILLRPFSNKRINLPPGPTPWPVIGNILQLGKNPHISLANMAREHGPLISLRLGTQLLVVASSPTTAAEILKTHDRIFSARYIPQTYRVKRYIGYSLAFSFECDERWKSLRSICKGELFTTRMLDVQADWRQKKVDEMVSSLLGKKGEEVTIGEMVFASAFNILGNAFFSQDVFNLENEDSGASGLKRHISRILQLGLAPNLADFYPSLGWMDIQGLNREAGAFVNRIYGIWEGFIKERREKDAHNNTSRNFLDVLLSAGCSDMQTKALILDMFVAGTDTITTLVDWTMAELVRNPKVMQKLKDELEQVVVGGQREGENAVKESHLIHLTYLQACIKESLRLHPPVPLLLPRQALDDRELMNYTIPKDCRLMVNVWAIGRDP…
Cinnamomum_camphora|Ccam01T000382.1		MDPLVWFLLVPLIVLLFFLPSSRKNLPPGPKPWPIIGNMLSMLTGAPHVELMKLARTHGPLMLVKFGAQPVIVASTPAAATEILKANDRILSGRFVPHSLRMKNHIKHSVVWTDCTDNWKTLRRIARTELFSTKMLDAQLLVREKKVAEMVNFVRGQDGKAVVITEFVFGTLLNILGHVVFSKDVFQYGEKGDKVGMQRLIREMLMIAASPNLSDFYPILAGLDLHGLLRACEARLNDVIGLWEGTVKERRENNDHTKQDFLEVLLANGFDDAQINAMFLETFGPGSETSSTTIEWAMAELLRSPEKMSKVRAELDREVGKDKLTEFHLPRLQYLQACIKETMRLHPAAPFLIPHRAVESCKVMGYTIPKDYQILVNAYAIGRDPDAWKDPNTFIPERF…
Cinnamomum_camphora|Ccam01T001247.1		MLYLTILLWSLWFFASWACIYLLLLARERSHPNKLPPGPTPLPIVGSLFQLGSKPNESLAELAKKYGPLMSLRLGGVLTVVASSVKTAKEVLQKNDQALSGRTVADAVRALHYHESTMGWSPATAYWRRLRMLCNTHMFTAQRLDASQGLRQQKVQQLIAYMQKNSQLGRAVNIGQAAFVTTLNLLSNSVFSMDLVDLNSDSAQEFKDTVHRIMEDAGRPNLSDYFPLLRPIDPQGIRRRMAAHFKKLYAIFDKLIDERMIHRESSNYSPRNDYLDLLLDQKDDKDFKIGRQDIRALIAEIFAAGSDTSSSTIEWAMAELICNPKAMARARKEVMETIGIGQEVKESDTAQLPYLQAVVKETLRLHPPVPLLVPHRAETSVSICGYNVPKHAQVLVNIW…
Cinnamomum_camphora|Ccam03T002583.1		MNAIEMEYSTLLVLASCLLWVFFLALQLARKKSSPAKLPPGPVPLPIIGSLFKLGNKPNEALAELAKTYGPLMTLRLGQVTTIVASSSTMAKEILQKQDHLLAGRTVVHTVCTLGYNDSSIAFSQPNQHWRKMRSICNTQIFTTQKLDSYQYLRRRKVQELLDHIREKSQTGQPVEIGEAVFATTLNLLSNTAFSVDLVGFSSKSAQEFSSLVWGFMEEIGATNLADYFTFLSPFDPQGRRFRMTGHLKRLFSVFDEKIEERLQERRSGSDDSGKRNDFLDTLLDQGLSRHHIKSLLADIFTAGSETSASTIEWAMAELLNNPKVMAKARAELNESIDKGKSMEESDISGLPYLQAVVKETFRLHPPAPLLLPHKAESDLEIGGYTIPKDSKVLVNVWA…
Cinnamomum_camphora|Ccam03T002584.1		MDFSTLLVCASCLWVLFQALQMARNKSSTAKLPPGPVPLPVVGSLFKIGDKPNESLAELAKTYGPLMTLRLGQVTTIVASSSTMAKEILQKQDHLLAGRTVVDSVRTLDYNDSAMAFSQPNQHWRRLRAICNTQIFTTQRLDSYQGLRRLKVQELLAHMREKSQMGQPVEIVEAVFVTTLNLISNTVFSVDLVGLNTESAQRFNRLIWGIMEEAGRPNLTDYFPFLRPIDPQGARRRMTAYFKQLLALFDEMIDDRLSSSGSPKKNDFLDALLEQTQGGGLTRHHVKCLLVDIFSAGSETSASTVEWSMVELLRHPKVMEKARSELVETIKEERPIEESDISRLPYLQAVLKETFRLHPPVPLLLPHRAESDVEIGGFTIPKDAKVLVNVWAIGRDPDT…
Cinnamomum_camphora|Ccam03T002586.1		MDFSTLLVCASCLWVLFQALQMARNKSSTAKLPPGPVPLPVVGSLFKIGDKPNESLAELAKTYGPLMTLRLGQVTTIVASSSTMAKEILQKQDHLLAGRTVVDSVRTLDYNDSAMAFSQPNQHWRRLRAVCNTQIFTTQRLDSYQGLRRLKVQELLAHMREKSQMGQPVEIVEAVFVTTLNLISNTVFSVDLVGLNTESAQRFNRLIWGMMEEAGRPNLTDYFPILRPIDPQGARRRMTAYFKQLLALFDEMIDDRLSSSGSPKKNDFLDALLEQTQGGGLTRHHVKCLLLDVFSAGSETSASTVEWAMVELLRHPKVMEKARSELIETIKEGRPVEESDISRLPYLQAVLKETFRLHPPAPLLLPHRAESDVEIGGFTIPKDAKVLVNVWAIGRDSNT…
Cinnamomum_camphora|Ccam04T002547.1		MEEIPGFLLLSSICFLVVLLLFLARNRHNSLLNNSRRLPPGPHGWPVVGNMFDLGQVPHETLAGLRSKHGPVVSLRLGAVTTVVVLSAEAAEEMFKNHDLSFADRTITEAMRACSFNQSSMALGQYGPYWRMLRRLCTTELFSNKCLNETLAVRRKSVDNMVGWIKEEAKQTGRIDVAHFVFTTVFNLVGNLMFSRDLLGPQSKEGAEFFRASSKMTEWSGTPNVADFFPFLKWLDPQRIRANMERDLGHALDIASCYIKERTENQKIDKGKDRKDFLDALLELKGETKDGSTNFSDKDVKIMILEIFLAATDTTTSTIEWAMAELLHKPELMNKVRGELDQVVGQNRKVEESDMEGLPYLQAVVKETLRLHPPIPFLIPRRAVKETEFMGYSIPVDTQ…
Cinnamomum_camphora|Ccam05T000448.1		MDALLLLLLLLLPVIFFLVLRPSHKNLPPGPFAWPILGNVNAKLNKAPHIALTELGRTHGPLMLVRFGLQPIVMANTHEAAMQVLKTHDRALSGRYIPHSLRMKNHIQHSLVWADCTENWKALRRVSRVELFSTKMLDAQMRSREEKVSELVNFLSRKEGEVVKLTDGVFGTLLNILGHVVFSKDVFNFNDKGDKVGMQRLIRELLVIGASPNLADFYPFLGGLDFQGLNRACVERVKQCNAMWESFVEERRGMKKEEAEKMHDFLQVLLNNGFNDAQINAMFLETFGPGSETSSTTIEWAMAELIKHPTIMAKVVEELNEQVGRGNSVKESHIPQLVYLQACIKETMRLHPAAPFLLPHRAVETCEVMGYTIPKDYEILVNAYAIGRDPRTWKDPLTF…
Cinnamomum_camphora|Ccam06T000034.1		MEPTSLALLVSFVFLVCYFLLRDPRPKGLPPGPRPWPILGNLLQLGDMPHSQLAHLAQSYGQLFTLKLGAQTVVVASSPTAAAEVLKAQDRTLSGRYVFHSFRIANHVEFSMVWSECNDYWKMLRRICRTELFSPKMIEAQAHLREEKVAQMVGFLKGKEGQVVKIAEVVFGTLFNIFGNLIYSKDVFDLDDPTGGEIKGHIWRLMELGNSTNPADYYPVLGKIDLLGQRRAVADCLQQIYDIWNVIMRERREKKGNDTNNDFVRVLLDAELNDHQINALLMEMFGAGTETSASTIEWAIAELTKNPTILSKLRQEIQTIVGHNPIKESHLPHLPYLQACVKETLRLHPPTPLLLPHKALEPCQLLGYTIPKDCQVMVNAWAIGRDPKTWKDPLNFSPE…
Cinnamomum_camphora|Ccam06T000658.1		MDLLTFLFLILIVWTCIHFLLQTRNSKLPPGPFPLPIVGSLFKLGSKPNESLAQLARLYGPLMTLQLGSLTTLVVSTATMANQLLLKHDLIFSGRTILDSVRVLRHHESSVVWIPPNPRWRTLRTLLNTQIMTVQRLDANIALRRAKVQELVSHVEDCSVTQRAVDIGRAGFVTVLNLISNSVFSVDLVDLGSQSEEAQEFKDVVWGILEEAGKPNISDYLPFLRWMDLQGVRRRSIGYFEKLHHLFDEMIDGRTRERSLGGYSRREDFLDVLLDQNEENGFQLKRHEIKALLADIFVAGSDTSSTTIEWAMAELLRNPQTMSMVRSELKEAIAKGRQVEESDIARLPYLQAVVKETLRLHPPVPLLIPHRAESTVEICGFTIPKHTQVIVNAWAIGRD…
Cinnamomum_camphora|Ccam06T000660.1		MDLLTFLFLILIVWTCIHFLLQTRNRKLPPGPFPLPIVGSLFKLGSKPKESLAQLARLYGPLMTLQLGSLTTLVVSTATMANQLLLKHDLIFSGRTVVDSTRVLNYHESSVVWTPPNHRWRTLRALLNTQIMTVKRLDANIGLRRAKVQELVSHVRDCTVTKRAVDVGRAAFATTLNLMSNTLFSVDLVDLGSEEAQEFKDVAWGIMEEAGRPNVSDYLPFLRWMDLQRVRRRSKGYFEKLYHLFDEMIDRRLRERSLGDYSRREDFLDVLLDHKEEEKGFQLKRHEIKALLVDIFVAGSDTSASTIEWAMAELLHNPNTMSMARSELKETVPKGKQLDESDIARLPYLQAVVKETLRLHPPAPLLIPHRAESTVEICGYIIPKDAQVIVNAWAIGRDP…
Cinnamomum_camphora|Ccam06T000661.1		MDLLTFLFLILIVWTCIHFLLQTRNRKLPPGPFPLPIVGSLFKLGSKPKESLAQLARLYGPLMTLQLGSLTTLVVSTATMANQLLVKHDFSGRTVLDSVRVHRHHESSVVWIPPNPRWRTLRTLLNTQIMTVQRLDANIALRRAKVQELVLHVEDCSVTQRAVDIGRASFVTVLNLISNSVFSVDLVDLGSQSEEAQEFKDVVWGILEEAGKPNISDYLPFLRWMDLQGVRCRSIGYFEKLHHLFDEMIDGRTRERSLGGYSRREDFNGENGFQLKRHEIKALLADIFVAGSDTSSTTIEWAMAELLRNPQTMSMVRSELKEAIAKGKQVEESDIARLPYLQAVVKETLRLHPPVPLLIPHRAESTAEICGFTIPKHTQVIVNAWAIGRDPNVWTNPTC…
Cinnamomum_camphora|Ccam06T000662.1		MDFLMILFLILIVWTCIHFLLQARNRKLPPGPFPLPIVGSLFKLGSKPNESLAQLAQLYGPLMTLQLGSLTTLVVSTAPMANQLLLKHDLIFSGRTVADSTRVLNYHESSVVWTPPNPRWRTLRALLNTQIMTVKRLDANIGLRRAKVQELVSHVRGCTVTKRAVDVGRAAFATTLNLMSNTLFSVDLVDLGSEEVQEFKDVVWGILEEAGRPNVSDYLPFLRWMDLQRVRRRSKGREDFLDVLLDHKEEEKGFQLKRHEIKSLLVDIFVAGSDTSASTIEWAMAELLHNPDTMSMARSELKETVPKGKQLEESDIARLPYLQAVVKETLRLHPPAPLLIPHRAESTVEICGYIIPKDAQVIVNAWAIGRDPNAWTNPASFLPERFLHSKLDFKGQDCQ…
Cinnamomum_camphora|Ccam06T001706.1		MDSFLLLYLLSLFFSFFFYYLTLVKSTSNPKRNLPPGPKPWPLIGNLLQIGKHPHMSLDQMARTHGPLISLKLGTQLLIVASSPSTASQVLKTHDRILSARYIPHTYRIKFHISHSLGFSFDCSERWKTLRALCKTELFTTRMLDLQAHLRQNKVAELVGSLYSSRGEVVNLGELVFGTAFNILGNLLFSRDVFGLGDKENSGLKHAVTRCLELGLAPNLADFYPWLGGLDVQGLNKEATGIVKKIYGIWEGLLKERRERDGGSEKKRDFVDVLQSAGCSEMQIKALCSDIFAAGTDTTTTLVDWTMSELVRNPKVMQKVRDELERVIGERREGEYAVRESHLIHLTYLQACIKESLRLHPPAPLLLPREALDKCEVMDYTVPKGSRVMVNVWAIGRDP…
Cinnamomum_camphora|Ccam06T001706.2		MDSFLLLYLLSLFFSFFFYYLTLVKSTSNPKRNLPPGPKPWPLIGNLLQIGKHPHMSLDQMARTHGPLISLKLGTQLLIVASSPSTASQVLKTHDRILSARYIPHTYRIKFHISHSLGFSFDCSERWKTLRALCKTELFTTRMLDLQAHLRQNKVAELVGSLYSSRGEVVNLGELVFGTAFNILGNLLFSRDVFGLGDKENSGLKHAVTRCLELGLAPNLADFYPWLGGLDVQGLNKEATGIVKKIYGIWEGLLKERRERDGGSEKKRDFVDVLQSAGCSEMQIKALCSDIFAAGTDTTTTLVDWTMSELVRNPKVMQKVRDELERVIGERREGEYAVRESHLIHLTYLQACIKESLRLHPPAPLLLPREALDKCEVMDYTVPKGSRVMVNVWAIGRDP…
Cinnamomum_camphora|Ccam06T001707.1		MTYQMQDISFLLILLPLLSLFFFFCTLLKPNLNLPPGPRPWPVVGNLLQLGKHPHASLAQMARAHGPLISLRLGTQLLVVASSPSTAAQVLKTHDRVLSARYIPHTYRVKTYIEHSLAFSFDCNEQWKRMRTVCKTELFTTRMLDAQAHMRERKVGELMGLLLSNRGRVVQLGKFVFGTVFNIMSNVVFSRDAFDLVDQEENKASRMKFGVSRALELGLVPNLADYYPSLARLDVQGLNRETASFLERIYYVWELFIRKRREEEEEEEEEEGDNDDRKPDFLSVLFSAGCSDLQLKALISDMFAAGTDTSTSVVDWTMSELMRNSKSMQKVKDELKQVVGERIDGEYAVSESHLSHLHYLQACIKESLRLHPPAPLLLPRQALEACEVMNYTIPKDCRV…
Cinnamomum_camphora|Ccam06T001741.1		MDYSTFLIWVSSILLLINLLQHARKKAKMPTLPPGPPPLPIIGNLFELGDKPHESLTELAKTHGPLMTLKLGSVTTVVVSSAAMAEEVLQKKDRLLSGRKIVDATRALKFNESSMAWSQPNQYWRKLRAISKTQLFSNQSLDAGQGLRHLKVRELIANMLEKSAAREAVDIGKAAFVTAINLISNSIFSTNVVDMDSEFSNEFYSIVWGFMEESGKPNLVDYFPMLRPLDPQGVRRHMKAHLKKAFETIDGMIDRRLLHGGTSTETTVTNDFLDALLDQNSGLTRQQLRSLIWELFAAGSDTSSSTVEWALTELLLNKNVMTMARSELKETIGKRKVEESDIARLPYLEAIIKETLRLHPPAPLLLPHKALSNVEIGGFTIQEDSLIFVNAWAIGRDPL…
Cinnamomum_camphora|Ccam08T001569.1		MDPLILLLLLLPIIYLFLFKRSHKNLPPGPFCWPIIGKIDMAFTKTPHQEVTKLARTYGPLMLIKFGSQLTFYASNAAVATEILKINDRHLSSARAAPPSVLIDGRIQYSLLWNECNDHWKSLRKVCRTELFTTRMLDSQTQIREKKVMELMNFLKAKQGQIVQVSDVVFVTLLNVLSNMIFSKDLFLYEEEDEKRGMKYLIRDITLTAVKLDISELFPILQQFDLQGIKQAVKNGLKPIFGSWAETVRDRKESKDHSRHDFLDVLIQGGFNDQTIDAMILEMLGAGSETTTSTIEWTLTELLRHPHMLKKLREELQTVVGDRPIKESDLPKLPYLHACIKETLRLHPPAPFLIPRRSTETCTVMNYTIPKGSQILVNAYAIHRDPDTWERPLDYWPER…
Cinnamomum_camphora|Ccam08T001572.1		MDPLILLLLLPIIYLFLFKRSHKNLPPGPFCWPIIGKIDMAFTKTPHQEVTKLARTYGPLMHIKFGSQLTFYASNAAVATEILKTNDRHLSSARAAPPSVLIDGQIQYSLLWNECNDHWKSLRKVCRTELFTTRMLDSQTQIREKKVMELMNFLKAKQGQIVQVSDVVFVTLLNVLSNMIFSKDMFLYEEEDEKRGMKYLIRDITLTAVKLDISELFPILRPLDLQGIKRAVKNGLKPIFGSWAETVRDRKEIKDHSRHDFLDVLIQGGFNDQTLDDMILEMLGAGSETTTSTIEWTLAELLRHPHMLKKLREELQTVVGDRSIKESDLPNLPYLHACIKETLRLHPPAPFLIPRRSTETCTVMNYTIPKGSQILVNAYAIHRDPDTWERPLDYWPERF…
Cinnamomum_camphora|Ccam09T001316.1		MLQTQIHTEEKGERERERERERMDLLTFLFLILTVWTCIHFLLQTRNSKLPPGPFPLPIVGSLFKLGSKPNESLAQLARLYGPLMTLQLGSLTTLVVSTATMANQLLLKHDLIFSGRTVLDSVRVLRHHESSVVWIPPNPRWRTLRTLLNTQIMTVQRLDANIALRRAKVQELVSHVEDCAVTQRAVDIGRAGFVTILNLISNSVFSVDLVDLGSQSEEAQEFKDVVWGILEEAGKPNISDYLPFLRWMDLQGVRRRSMGYFEKLHHLFDEMIDGRTRERSLGGYSRREDFLDVLLDQNEEKGFQLKRHEIKALLAYTGTQPGVLIGQDIFVAGSDTSSTTIEWAMAELLCNPQTMSMVRSELKEAIAKGKQVDESDIARLPYLQAVVKETLCLHPPVP…
Cinnamomum_camphora|Ccam09T001321.1		MDLLTFLFLILIVWTCIHFLLQTRNSKLPPGPFPLPIVGSLFKLGSKPNESLAQLARLYGPLMTLQLGSLTTLVVSTATMANQLLLKHDLIFSGRTVLDSVRVLRHHESSVVWIPPNPRWRTLRTLLNTQIMTVQRLDANIALRRAKVQELVSHVEDCAVTQRAVDIGRAGFVTILNLISNSVFSVDLVDLGSQSEEAQEFKDVVWGILKEAGKPNISDYLPFLRWMDLQGVRRRSMGYFEKLHHLFDEMIDGRTRERSLGGYSRREDFLDVLLDQNEENGFQLKRHEIKALLADIFVAGSDTSSTTIEWAMAELLCNPQTMSMVRSELKEAIAKGKQVDESDIARLPYLQAVVKETLCLHPPVPLLIPHRAESTVEICGFTIPKHTQVIVNAWAIGRD…
Corydalis_tomentella|GWHPAORS016092		MDFSAYVLWFLLACTCLYILIITSASSRRTKSQSIKLPPGPSPLPIVGSLFKLGNKPHESLTQLAKIFGPLMTLKLGSITTIVASSPEMAKEILQKNDQALSNRAVVDAVRASNHHELSVAWLPALQKWRNIRKIINLHLFSTQCLAANQDLRNQKVNDLMDYIHECSVSSGGTAAIGIGQVVFTTVLNLMSSIMFSVDLANYNSESAHSFIAIVRGVMDEVGKPNFADYFPMLRPIDPQGIRRRMSIYFGKLDKIFDEMIDRRLQSTEPHTSNDLLDTLLSISQQDKSSEFGRPEINALLEDTFIGGTDTTSSTVEWAMAELLKNPNAMGKARKELDNVITSKDRRIQESDIAQLPYLQAVVKETFRLHPALPLIVPHKGESDVNICGFVIPKNAQVL…
Corydalis_tomentella|GWHPAORS017560		MEILSIAILSVVISTLIYYLFFSDSKAQKGLPPGPKPWPIVGNLLQLGDKPHSQFAEMAQTYGDLFTLKMGTETVVVASTPAAAIEILKTHDRLLSARYVFQSFRVPNHVENSMVWSDCNEVWKMLRKVCRTELFTPKMIEAQAHVRESKAMDMVKFLKGKQGGEVKIAEVVFGTLVNIFGNLIFSQDVFELGDPSSGSAEMKEHLWRMLELGNSTNPADYFPILGRFDLFGQRKDVAECLRQIYDVWGVMLKERKAKKTAAQENKGNDNNDFVDVLLDSGLNDFQINALLMELFGAGTETSSSTIEWAITELTKNPHITAKLRAELESVVGQSPVKESDIPNLPYLQACTKETLRLHPPTPLLLPRRAIETCQVMNYTIPKDCQIMVNAWAIGRDPKI…
Nelumbo_nucifera|NNU01g01353		MVELPGGEVPGGELLGDKLPGGELLGDELPGGELPGDELPGGELPGDELPGGELPGNELPGGELPGDELPGVPRHLNCSQERMVELPGGEVPGGELLGDELPGGELLGDELPSGELPGDELPGGELPGDELPSGVLPGDELPGGFETRTKEQVISQLIGIENHPRACRDNTKIDSFGSTITSVWRIYLRSQSRSKKSKNIHKSQLYRSFDFQQEEGLLNQVKYLNSGRLDIERLQPLKSSWDTGTDTTSTTSEWAMAEIMRKIQDELDDVVGKNSTVEELHIPKLHCLDAVVKENLRLHLVAPLLLPRHPSKSCYVARYTIPEGAQVLVNAWGIHRDPEAWDNPLEFHPESFLTKNGKWDYSGNNFHYFPFGTGRRICAGIPLAKRLLPYVLASLLHLF…
Nelumbo_nucifera|NNU01g06129		MENSNSSFLLLFCFICTFIYFLASGRRGSKSVSPKLPPGPIPLPLVGNLLKLGNKPHEALTELAKAYGPIMTLKLGCLTTVIISSSSMAKEVLRKNDQALSARIIPDSVRACNHHQVSMVWSPPSPQWRNMRKICNTEIFSSQKLDAMQGLRCQKVEKLVAYVRDNSRAGRAVNIGQAAFVTSLNLLSNTFFSVDLVHLGSDSAQDFKELIWAVMEDGGRPNLADNFPILRWIDPQGVRRRLSSHFQRLLEIFDEMIDQRLQLRALLASPTHNDNSDVLDVLLNHTKDNASQFGRNELRHFILDLFVAGTDTTSSTLEWAMAELLRKPEAMVKARMELEETKQNGKSIEESDIVRLPYLQAVVKETFRLHPPAPLLLPHRAEIDVEICGFTLPKDAQVL…
Nelumbo_nucifera|NNU01g06130		MENSNSSLLLLFCFICTFIYFLASGRRGSRSGSPKLPPGPIPLPLVGNLFKLGNKPHEALTELAKAYGPVMTLKLGCLTTVVISSSSMAKEVLRKNDQALSARTIPDSVRACNHHQVSMVWLPPSPQWRNLRKFCNTEIFSSKKLDSMQGLRCQKVEELVAYVHNNSRAGRAVNIGLAASVTSLNLLSNTFFSVDLVHLGSDSAQDFKTLIWAVMEEVGRPNLADYFPILRWIDPQGVKRRLSSHFQRLFEIFDEMIDQRLQLRASLTSPTYNSDVLDVLLNHTIDNYSEFGWKSPTDLRNFLLDLFVAGTDTTSSTLEWAMAELLRKPEALVKARMELEETIQKGKSIEESDIVRLPYLQAVVKETFRLHPPAPLLVPRRSDIDVEICGFTVPKDAQV…
Nelumbo_nucifera|NNU01g06131		MENSNSSLLLLFCFICTFIYFLASGRRGSRSGSPKLPPGPIPLPLVGNLFKLGNKPHEALTELAKAYGPVMTLKLGCLTTVVISSSSMAKEVLRKNDQALSARTIPDSVRACNHHQVSMVWLPPSLQWRNLRKFCNTEIFSSKKLDSMQGLRCQKVEELVAYVHNNSRAGRAVNIGLAASVTSLNLLSNTFFSVDLVHLGSDSAQDFKTLIWAVMEEVGRPNLADYFPILRWIDPQGVKRRLSSHFQRLFEIFDEMIDQRLQLRASLTSPTYNSDVLDVLLNHTIDNYSEFGWKSPTDLRNFLLDLFVAGTDTTSSTLEWAMAELLRKPEALVKARMELEETIQKGKSIEESDIVRLPYLQAVVKETFRLHPPAPLLVPRRSDIDVEICGFTVPKDAQV…
Nelumbo_nucifera|NNU02g03039	NnCYP80Q1	MALLVSFIFFLLSILSVVLFLKPSPNNLPPGPFSWPIIGTLLPKLKKQPHVELSKLAQRFGPLMLLKFGVEPVVVASSHVAAVEVLKNQDRLLSGRFAPHSVRIKGYIEHSMVWADCTDYWKMVRKVWRTELFSTKMLDIQAHAREEKVSELMKFLIRKEGEKVNFADVIFGSILNILGALIFSKDVYDFEDRTDNNLGMKGMIRQLMILAAIPNLADLYPILGGSDFQGLRKASAACVKRMNESWAAIVKQRRKNDDHSKNDFLQVLLDSGFSDPQIDAMLLETFGPGSDTSTSTIEWAMAELLRNPEKLVKVREELDRVIRRSNNVKESDLPNLPYLHACVKETLRLHPPVTFLLPHRAMETCQMMNYTIPKGCQLMVNTYAIGRDSKTWEKPLSFL…
Nelumbo_nucifera|NNU02g03040	NnCYP80Q2	MALLALFILFLLSILSLVLFLKPSSKKLPPGPFSWPIIGTQLPSPTMKPNLELFKLAQRYGPLMLFRFGFENVVVASNHVAAMEVLKNQDRVLSGRFKANSVRVKGYIEYSMVWADCTDYWKMVRKILRTELFSTKMLDVHAHVREEKVSELMKFLRRKEGEEVNFVDVIFGCILNMLGALIYSKDVYDFEDKTDINLGMKGMIRQLMILAATPNIADLYPIFFDGSDFQGLRKESAACVKRMSESWAAIINERRKNNDHTKNDLLQVLLDSGFSDPQIDAIFLETFGPGSDTSASTIEWALAELLRNPEKLVKLHEELDRVIGRNNTVKDSDLPNLPYLHACVKETLRLHPPVPFLIPHIALESCEVMNYTIPKGSEVLVNLYAIGRDPTTWDNPNSF…
Nelumbo_nucifera|NNU03g03155		MEIMAQAALAGEVINLLFPVFLSLCLFFLFIKLIKSASSATGPPLPPGPHPWPVVGNIFRLGRKPHVRLSQLAQVHGPLMSLSLGRQLIVVASSPATATQILKTHDKILCGRYAPVSSRRNDQLKYLDNFLWTELFSTRAIDSQAALREKKVRELIRYLGSKEGEVVNIGEVMFATVFNILCNLFLSKDFISLEDDEIMKGGIKRLLRSISEVASTPNLADLFPILGPLDIQGLNKKARELFVKITAMWEDIIKERREAQSAGGHVSRQRDLLDVLIDNNFSDDQINNLLLKLFTAGTHTSSSTIEWAMAEMMKNQESLVKARIELAREIKRENQVREADLCNLVYLNACLKETLRLHPPAPFLLPHRAIKTCTVMNYTIPKDSQVFVNVWAIGRDSMA…
Nelumbo_nucifera|NNU04g01107		MGEVTVTGGAEFNISFLLFLLLLLLIPLFVFFLGHIKLSLWKASTLPPGPYPWPVIGNILDMGKKPHISLAHFAKIHGPVISLRLGTQLLVVGSSPAAAAEILKTHDALLSARHVPQVSPMKDPKLNHLSLAWAFTCSKQWKLLRNLCRAELFSSKAIESQVNLREKKVKEMLCFLGRKEGKIVKIGEVVLAAVFNILGNLFLSKDLVSLDDETSNEGIKGLIWRLMELATTPNLADFYPILDWLDIQGLRKTTLETIGKLQDIWEGLIEERRVSNDYGVRRPQDFLDVLIGHGFQDNQISNLLLELFLAGTETTSTTVEWAMVELLKNQEAMKKLNEELARKMNGNDIREFDLPQLSYLSVCIKETLRLHPPTPFLLPHKALETCTVMNYTIPKDSQI…
Aquilegia_coerulea|Aqcoe2G408700.1.p		MEIIYVVFIVSLPLYFFLFILRDLCQKNLPPGPYPSPIIGNLLQVGNKPHVQFAKLAKTYGDLFTLKLGFQRVVVASSPAAAIEVLKKHDKILTGRYVFQSIRVKEHIENSLVWSECNENWRLLRKICRTELFSHKMIESQAHLREAKVLDMVRFLQKKEGEVVKIVEVVFGTLFNIFGNLLFSKDVYDFEDPTGGKAEMKEHFWKLLEIGNATNPADYFPIMGKFDLFGQRREVASVIRQIYDVWGVMLKERRRMKGNENDFVSVLLSAGLDDLKINALLMELFGAGTETSASTIEWAVAELTKNPRVTFNIQSELVNVVGEKTVKESDIPHLPYLQAFVKETLRLHPPTPLLLPRRALETCKVMNYTIPKDCQIMVNAWAIGRDPKTWDDPLTFKPE…
Aquilegia_coerulea|Aqcoe2G185500.1.p		MEFELVCLFVALVVYVVWAMLNERHHRRREELGQLPPGPRGLPVVGNMFQLGWAPHVSFAELARKHGAIMTIRLGIMRTVVISSNDVAREMFKNHDMVLAGRKIYESMKGKKGNEGSLITAQYGSHWRMLRRVCTSEFFVTSRLDAMKGVRGRCVNNMVQYVEEASEGGTNAIDIGRYIFLMSFNLIGNLMFSKDLLDPKSKRGAAFFYHAGKVMDFAGKPNVADFLPMLRWLDPQGIRRKTQYHVERAFNIAGGFIKERMESEMNDVSGEKKKDFLNVLLDFQGNGIEEPAFTARTINVIVLEMFTAGTDTTTSTLEWAMAELIRHPKAMKKVQDELREVVKSYRELEENDLENLPYLKAVIKETLRLHPPLPFLVPHMAMDTCKMLGYYIPKETQVL…
Aquilegia_coerulea|Aqcoe2G408600.1.p		MEVLSATIVSLIFFFLFIFLILRDSRRKDLPPGPRPAPIIGNLLQLGDKPHAEFAKLAQKYGELFTLKLGSETVVVASSPAAAAEILKTHDKILSGRYVFQSFRVTEHVRNSIVWSECNETWKLLRKVCRTELFCPKMIESQAYIREAKALDMVRFLRKKEDEVVKIVEVVFGTLVNIFGNLIFSKDVFDLEDPTGGSTELKEHLWKLLDLGNSTNPADYFPIMGKYDLFGHRREVAKVLEQIYDVWGVMLKERRGTKGNKANDFVNVLLNAGLDDQKINALLMEMFGAGTETSASTIEWAITELTKNPRVISKLRSELINVVGDKTVKESNIPHLQYLQAFVKETLRLHPATPLLLPRRALETCKVMNYTIPKECQIMVNAWAIGRDPKTWDDPLTFK…
Aquilegia_coerulea|Aqcoe2G408600.2.p		MIESQAYIREAKALDMVRFLRKKEDEVVKIVEVVFGTLVNIFGNLIFSKDVFDLEDPTGGSTELKEHLWKLLDLGNSTNPADYFPIMGKYDLFGHRREVAKVLEQIYDVWGVMLKERRGTKGNKANDFVNVLLNAGLDDQKINALLMEMFGAGTETSASTIEWAITELTKNPRVISKLRSELINVVGDKTVKESNIPHLQYLQAFVKETLRLHPATPLLLPRRALETCKVMNYTIPKECQIMVNAWAIGRDPKTWDDPLTFKPERFMHSSVDYKGNDFELIPFGGGRRICPGVPLASQFLSLIVATLVQNFDWSLPQGMNIHELTMDEKFGLTLQKDLPLLIVLKARNSIQLQD*
Aquilegia_coerulea|Aqcoe2G356000.1.p		MEQSNLFIFILLLILFVLFLVLHHMRQKFSKYPPGPYPLPILGNFLHLRKTPHISLANLAKVHGPLISLRLGAKLLVVASSQEAATEILKIHERVMSGRPVPLTIEAVSKGLDFFTLIGATSCTKNWKILRTIVKAELLSTEVVDKTTAAREEKVKELINLLSSKQGKVVNLGDYVFATAANTVSRLLFSKDCISLENQGMVGGFSKENIKTIVKMASTPNLGDHYAIFNGLDIQGLGKKSVECLGRLYASWNSLIDGRHVSKCGDHVGKDKDFLDVLLANGFSKDQINLILSEMFITGIDTTSTAVEWAMAELIKNQDAMTKLSEELAKEIGGNIIRDSDLPRLPYLNACVKETLRLHPSVAMIPRRAIETCQVMNYTIPKNAEIWVNLWALGRDPTK…
Aquilegia_coerulea|Aqcoe4G218500.1.p		MAFEVVAGLLLALALCVLWAMIIDWKQHRREELGQLPPGPIGLPVLGNIFQLSWAPHVSFAKLAQTHGSIMTVRLGTMRTIVISSSDVAREMFKNHDTVLAGRKIYEAMRGKEGASEGSIILAQHGPRWRMLRRLCTSEFFVKSRLDTTLVLREKCVRGMVRYVQEASDGGTNNAIDIGRYIYLMSFNLIGNFMFSKDLLDPNSTTGADIFYHAGKIMDLAAKPNIADFLPMLRWLDPQGIKRKSQFHMEKAFNLVGGFIKERMEESKDDAGEKRNDFLDVLLNFRGDGVEEPAMFSPRIINANVMEMFIAGTDTTTSTLEWAMAELLQNPMAMNKAQDELRGSQGVLAENDMKTLPYLTAVIKETLRLHPPLPFLVPHKAMDTCKMFGYYIPKETQIL…
Aquilegia_coerulea|Aqcoe4G070300.1.p		MEFFYTYMLLFLSFVWLCLITLWPRKTNLPPGPFPLPIVGSLFKLGIKPHQSLAELATIYGPLMTLKLGSVTTIVVSSPAIAKEVLQKNDKIFSNRTIPDALRALDHHKHSMAWLPVSAKWRSIRKISSTQLFTAQRLESNQGLRKQKVEELLEYVEENCKNKLAVDIGQVAFSTVLNLISNTVFSTDITHLDSNYAQEFKALIWGVMEEGGRPNFADYFPVLRSIDPQRIKHRMEGHFRKLDELFDGMIKQRLESRKLDNSPTSSSCSDFLDAILDYKQEDGFQLSDPDIKSLLKDIFAAGTDTTSSTLEWVMTELLCNPEKMAKAQAELKEIIAENKPIDESVIIRLPYLQAVVKETFRMHPPVPLLLPHKAESLVELCGYIVPKNTQVLINVWTMG…
Aquilegia_coerulea|Aqcoe4G169300.1.p		LPPRPRELHVLGNIFQLSWAPHVSFAKLAHKHGSIMTVRLGTMRTIVISSSDVAREMFKNHDTELAGRKIYEAMRGKEGDSEGSIILAQYGPHWRMLRRLCTSEFFVKSRLDSTLMLREKCVCGMVRYILEVCEGGTNNAIDIGRYIYLMSFNLIGNLIFSMDLLDPNSRTGAEFFYHAGKIMDLAVKPNIADFFPMLRWLDPQRIKGKLEHESNDDAGANKKDFLDVLLNFRGDGVEEPVMFSPRVINATVMEMFIAGTDTTTSTLEWAMAELLQNPTAMIKVQDELRGVLDINSQGVLGENDMKRLPYLTAVIKETLRLHPPLPCLVPHMAMDTCKMLGYYIPKETQVLVNVWAIGRDPKLWKDPLVFKPERFLEMNMVDFKRHNFEYLPFGSGRRI…
Aquilegia_coerulea|Aqcoe4G117700.1.p		MELFYTYMFLFLSFVWLCVITLWPRNNQLPPGPFPFPIVGSLFKLGTEPHKSLAELSKIYGPLMALKLGNVTTIVVSSPTMAKEVLQKNDKAFSSRTIPEAVRVLDNHKHSMIWLPASSKWRSLRKVSSSQLFTTQRLESNQGLRKKKVEELLSYVGENCKNKCAVGIGQVAFSTILNLISNTVFSMDLTHLDSNYAQEFKSLVSIIMEEGARPNFVDYFPILRSIDPQRIKYRMEGHARKLDEFFDGIIKQRLESRKLSKSPRSSCSDFLDAILDYKQEDGFQLSDPDIRAMLRDIFGAGTDTTSSTVEWAMTELLRNPEKMTKAQSELNEMIDENKPIDEADIVRLPYLQAVVKETFRMHPPVPLLIPHKAESRVELCGYIVLKNTQVLINVWTMGR…
Aquilegia_coerulea|Aqcoe4G265500.1.p		MEMFKKHDLAFSDRAVNEGFKVDGYNQASMAVAPYGTFWRMMRRIYTVELFTNSRIKATEDFRTRSMEKMIEWIWKEAQEKGSVEFARFVEIMNFNAIGNAIFSKDIVNPQLNNGTEFFTSTAQTLELVTKSNVADYFPWLRWLDPQGMKKKMKQLMRRMIGFSSALVKERILDRKNGKRNEKKDFLDVMLDFQGNQLDGESANLSERNISIGIQELLQAATDTSTSTIEWAMTELLRNPEVMRKVEAELNQVVGLKKVEEGDIRNLPYLQAVVKETLRLHPAVPLLVPRSVREDTEFMGYSIPKNTQIFVNVWAIARDPASWDDPLTFKPERFLSSDVDYKGQHFQFLPFGAGRRMCVGLPFAQNMLHCTIASLIHSFEWSLEDGITPDKINVEERLG…
Aquilegia_coerulea|Aqcoe4G265500.2.p		MEMFKKHDLAFSDRAVNEGFKVDGYNQASMAVAPYGTFWRMMRRIYTVELFTNSRIKATEDFRTRSMEKMIEWIWKEAQEKGSVEFARFVEIMNFNAIGNAIFSKDIVNPQLNNGTEFFTSTAQTLELVTKSNVADYFPWLRWLDPQGMKKKMKQLMRRMIGFSSALVKERILDRKNGKRNEKKDFLDVMLDFQGNQLDGESANLSERNISIGIQELLQAATDTSTSTIEWAMTELLRNPEVMRKVEAELNQVVGLKKVEEGDIRNLPYLQAVVKETLRLHPAVPLLVPRSVREDTEFMGYSIPKNTQIFVNVWAIARDPASWDDPLTFKPERFLSSDVDYKGQHFQFLPFGAGRRMCVGLPFAQNMLHCTIASLIHSFEWSLEDGITPDKINVEERLG…
Aquilegia_coerulea|Aqcoe4G070100.1.p		MELFYTYVYLMISFAWLCLITLWRRKNKLPPGPFPLPIVGSLFKLGTKPHKSLAELATIYGPLMTLKLGSVTTIVVSSPAMAKEVLQKNDQAFSSRTIPDAVRALDHHKHSMAWLPVSSKWRSIRKISSTQLFTAQRLESNQGLRKQKVEELLAYVEENCKNKRAVDIGQVAFSTVLNLISNTVFSIDLTHLDSNYAQEFKALIWGVMEEAAKPNFGDYFPILRSLDLQKIKYRVEGHFHKLDELFDGMIKQRLESRKLDNSPSSSCSDFLDAILDYKQEDGFQLSDPDIKSLLKDIFAAGTDTTSSTVEWVMTELLRSPEKMAKAQAELKEIIAENQPIDESDIIRLPYLQAVVKETFRMHPPIPLLLPHKAESLVELCGFIVPKNTQVLINVWTMGR…
Aquilegia_coerulea|Aqcoe4G282900.1.p		MEWTLAYTIWSCISLGVALLLIREIFLVSDKKQLPPGPPGWPVIGNLLDLGGAPHLSLASLSKKYGPVIWLRFGAVNTMVVSSADAAMELFKNHDLTFADRKTNEAMRLNGFDQGSISLSEYGPYWRMLRRICSTELFSGKRIKDTETLRANCIEKLKKWICEEGQKKGAVEIARFAALGNFNVILNAALSKDNFLDPQSNEGTEFFGSVSRVEELVGMPNVADFFPFLRWLDPQGVKKKVERALEHPLNIATGFVKERIEWKKGHITSRKDFLDVMLEFQGNEKDGEPTKISEKNINILIMELFIASTDSTSNTIEWAMAELLRNPNIMRNVQDELDQVVGQNRKVEESDIGKLHYLQAVVKETLRLHPPAPLLVPRRAVKNTVFMGYSIPKETQVLV…
Aquilegia_coerulea|Aqcoe4G114000.1.p		MELFYTYMFLFLSFVWLCVITLWPRNNQLPPGPFPFPIVGSLFKLGTEPHKSLAELSKIYGPLMALKLGNVTTIVVSSPTMAKEVLQKNDKAFSSRTIPEAVRVLDNHKHSMIWLPASSKWRSLRKVSSSQLFTTQRLESNQGLRKKKVEELLSYVGENCKNKCAVGIGQVAFSTILNLISNTVFSMDLTHLDSNYAQEFKSLVSIIMEEGARPNFVDYFPILRSIDPQRIKYRMEGHARKLDEFFDGIIKQRLESRKLSKSPRSSCSDFLDAILDYKQEDGFQLSDPDIRAMLRDIFAAGTDTTSSTVEWAMTELLRNPEKMTKAQSELNEMIDENKPIDEADIVRLPYLQAVVKETFRMHPPVPLLIPHKAESRVELCGYIVPKNTQVLINVWTMGR…
Aquilegia_coerulea|Aqcoe4G069900.1.p		MELFYTYVYLMISFAWLCLITLWRRKNKLPPGPFPLPIVGSLFKLGTKPHKSLAELATIYGPLMTLKLGSVTTIVVSSPAMAKEVLQKNDQAFSSRTIPDAVRALDHHKHSMAWLPVSSKWRSIRKISSTQLFTAQRLESNQGLRKQKVEELLAYVEENCKNKRAVDIGQVAFSTVLNLISNTVFSIDLTHLDSNYAQEFKALIWGVMEEAAKPNFGDYFPILRSLDLQKIKYRVEGHFHKLDELFDGMIKQRLESRKLDNSPSSSCSDFLDAILDYKQEDSFQLSDPDIKSLLKDIFAAGTDTTSSTVEWVMTELLRSPEKMAKAQAELKEIIAENQPIDESDIIRLPYLQAVVKETFRMHPPIPLLLPHKAESLVELCGYIVPKNTQVLINVWTMGR…
Aquilegia_coerulea|Aqcoe4G282300.1.p		MEWTLAYTIWSCISLGVALLLIREIFLVSDKKQLPPGPPGWPVIGNLLDLGGAPHLSLASLSKKYGPVIWLRFGAVNTMVVSSADAAMELFKNHDLTFADRKTNEAMRLNGFDQGSISLSEYGPYWRMLRRICSTELFSSKRIKDTETLRANCIEKLKKWICDEGQKKGAVEIARFAALGNFNVILNAALSKDNFLDPQSNEGTEFFGSVSRVEELVGMPNVADFFPFLRWLDPQGVKKKVERALEHPLNIATGFVKERIEWKKGHITSRKDFLDVMLEFQGNEKDGEPTKISEKNINILIMELFIASTDSTSNTIEWAMAELLRNPNIMRNVQDELDQVVGQNRKVEESDIGKLHYLQAVVKETLRLHPPAPLLVPRRAVKNTVFMGYSIPKETQVLV…
Aquilegia_coerulea|Aqcoe4G282600.1.p		MEWTLAYTIWSCISLGVVLLLIREIFLVSDKKQLPPGPPGWPVIGNLLDLGGALHLSLASLSKKYGPVIWLRFGAVNTMVVSSADAAMELFKNHDLTFADRKTNEAMRLNGLYQGSISLSEYGPYWSMLRRICLTELFSSKRITDTETLRANCIEKLKKWICEEGQKKGAVEIARFAALGNFNVILNAALSKDNFLDPQSNEGTEFFRSVSRVEELVGMPNVADFFPFLQWLDPQGVKKKVERALEHPLNIATGFVKERIEWKKGHLTSRKDFLDVMLEFQGKNGEPTKISEKNISILIMELFIASTDTTSNTIEWAMAELLRNPNIMRNVQDELDQVVGQNRKVEESDIGKLHYLQAVVKETLRLHPPAPFLVPRRARENTIFMGYSIPKETQVLVNV…
Aquilegia_coerulea|Aqcoe7G041200.1.p		MDLQVALFSLIPIILVCILFFKSKHKNLPPGPHAWPLIGSLPVLFTNTEVPLHITLTNMAHTHGPMMILWLGTQPTLVASTAEAAMEILKTKDRVCSGRHIRMSFRLKHHIKYSLVWSDCTDYWKLLRKIARTEIFSPKMLQAQSHVREQKVGELVEYLRSKEGQVVKLTQFVFGTLLNILGNVVFSRDVFVYSDDDGNKDGIQNLIREMLMIGAEPNIAEFYPILEELDLQGLKRKCDERFLRVMKLWKGTVNERKEKRNEETKDMLDVLLANDFNDAQINALFLETFGPGSETSSATIEWVMSELIKNPKEMAKVRKELDEVVGTSTVKESHLPQLPYLQACIKETMRLHPAAPFLLPRRAIEACELMGYTIPKDCQILVNAYAIGRDPHSWTDPLT…
Aquilegia_coerulea|Aqcoe5G418700.1.p		MNLFFLNVLLVLPVFYLILEYTRRKFSNYPPGPYPLPILGNFLNLHKPGHIALANLAKVHGPLMSLRLGTKLLVVGSSQAAATEILKINDRVMCGRRIPQTFEAVGKTFDLVSILGANKCNENWKMLRTMFKTELVSAEATEEKSVLREEKVKVLIDFLSSNKGNVVNIGEVVFTTAANFISNLLFSKDFISIKDEGKVGAAKEHIREMERLASCFNLEDYYPIFRGLDIQGLGKKALKCIESLNACWDVIIDERQESIKNGAICKDKDFLDALLANGLNKDQINWIFGEILITGVDTSSGAVEWAMAELIKNPEAMTKLREELTKELGGGTIVKDSDLPRLPFLNACVKETLRLHPTVTIVTRRSTETCKVMNYTIPNDSLVWVNLWALGRDPTKWDD…
Aquilegia_coerulea|Aqcoe5G418700.2.p		MNLFFLNVLLVLPVFYLILEYTRRKFSNYPPGPYPLPILGNFLNLHKPGHIALANLAKVHGPLMSLRLGTKLLVVGSSQAAATEILKINDRVMCGRRIPQTFEAVGKTFDLVSILGANKCNENWKMLRTMFKTELVSAEATEEKSVLREEKDFISIKDEGKVGAAKEHIREMERLASCFNLEDYYPIFRGLDIQGLGKKALKCIESLNACWDVIIDERQESIKNGAICKDKDFLDALLANGLNKDQINWIFGEILITGVDTSSGAVEWAMAELIKNPEAMTKLREELTKELGGGTIVKDSDLPRLPFLNACVKETLRLHPTVTIVTRRSTETCKVMNYTIPNDSLVWVNLWALGRDPTKWDDPSAFRPSRFLESNLGFMGSNYEYLPFGTGRRMCPGLP…
Aquilegia_coerulea|Aqcoe5G418600.1.p		MISTDADTTSAAVEWMMAELIKNPEAMNKLGEELAKELSGKIVRDSELPRLSYLNACVKNHYDYISPIWEIISIPFGSGKRICPGLPLAARTVPLIVASLVHSFEWNLPDDKSPAEINMDEKLSLVVFIYEKSFSVIITDTVYDPYNKLIFNMYSSRFLSFKRLKALLLLPLLFVILRHIKPTSSKELPLPPGPNPWPVIGNIFNLGRKPHRSLHKLAQTYGPLMSLRLGSQITVIGSSSIAAKEILKTHDRLFSARHVPHSIHAKSPEFNPLSIVWASECTEQWKFLRTICRTELFSTKAIESQANLREKDFISIHDEGKVGGMKELIRKIMEVGSLPNAADFFPILGGMDVQGLHKTFLECVTTLFASWDVLIKERKQGNGKHFEGSTQSDLLDVLL…
Aquilegia_coerulea|Aqcoe3G318400.1.p		MEVLSAALVPSIFFFLIIFFILRVKDSRRKDLPPGPRPFPIIGNLLQLGDKPHAEFAKLAQKYGELFTLKLGSQTVVVASSPAAAEEILKTHDRIFSGRYVFQSIRVKEHIENSLVWSECNENWRLLRKVCRIELFSPKMIESQAYIREVKALDMVRFLRKKEGQVVKIVEVVFGTLVNIFGNLVFSKDVFDLENPSGGSAELKEHLWKLMDIGNSTNPADYFPIMGKFDLFGQRRQVAKVLEEIYDVWGVMLMERRRMKGKKENDFVNVLLDAGLDDQKINALLMEIFGAGTETSSSTIEWAITELTKNPRVMSKLRSELIDAVGEKTVKESDIPHLPYLQAIVKETLRLHPATPLLLPRRALETCKVMNYTIPKECQIMVNAWAIGRDPKTWDDPLT…
Aquilegia_coerulea|Aqcoe3G417400.1.p		MEYTTILLWILVVWVLHVFISARKLFTGKLPPGPFPLPIIGSLFKLGDKPHKSLAQLAKVHGSLMTIKLGSVTTIVVSSASMAKEVLQTNDQHLSGRTVPDAMRILNHHEASMVWSHSSLPQWRSLRKLCASQIFTTQRLNENEGLRLMKVKDLIAFVRDSSKSRHAVNIGQAVFSTTLNIISNIIFSIDLAQFNSESTQDFKAAVWGVLEEAGRPNLADYIPILRPFDPQGVRRRTATYFGKLDNLFDTLIDQRMQSNKEQNVPNDLLDTVLQYTQENGSKLRRLDITSLLKDLFIAGTDTSAGTLEWAMTELLRNPDIMAKARLELKETIDKDKLIEESDIAQLPYLQAVVKETLRLHPPAPLLVPHRAETDVKICGFTVPRHAQVLVNAWTIGRDP…
Coptis_chinensis|Cch00025833-PA		MDLQIALFSLIPVILVLILLLKPKYKNLPPGPHPWPLIGNLPTLFTNTEVPLHITLANMARTHGPIMILWLGTQPTVMASTAEAAMEILKTHDRIFSARHIRMSFRLKHHIKYSLVWSDCTDYWKLLRKIVRTEIFSPKMLQAQSHVREQKVAELIEFLRSKEGQVVKISQFVFGTLLNILGNVVFSKDVFVYSDETDKGGIQNLIREMLMIGAEPNVAEFYPILEELDLQGLKKKCDDRFIRVMKMWEGTVKERKANRNEESKDMLDVLLANDFNDAQINALFLETFGPGSETSSATIEWVIAELIKSPKEMAKVRKELNEVVGTSTIKESDLPQLPYLQACIKEAMRLHPAAPFLLPRRAAETCEVMGYTIPKNSQVLVNAYAIGRDPKSWKDPSTF…
Coptis_chinensis|Cch00030907-PA		TNCSAERNKSPLLFFTPCFTLLFLILKQIKSPSNLPPGPFPWPIIGNILNMGNKPHISLARLAKAYGPLISLRLGTQLVVVGSSQAAATEILKTHDRILSARCVPHVIPVYPDQIHLSMAWVDCSDQWRYLRTLCRTELFSAKAIASQASVRDKKTNELMEFLAKKEGKLVNIGEVVFATVFNMLSNIFVSKDFISLEEESEDGGLKGLLRRFAELGSTPNLADFYPILSGLDLQGITKKSKEMFGQIIGVFRVITKQRREDEGNDVSRQRDFLDSLLDSELHDDQINYLIQELFFAGADTSSSTVEWAMTELIKNPKAMRKVCAELERETSGHIVKESELPHLPYLRSTVNETLRLHPPAPFLLPHRALETCKVLNYTIPKDCQVLVNAWAIGRDPST…
Coptis_chinensis|Cch00034002-PA		MTVCDVDEVEVWECSVGTGWNPRDRDLNRLEPSASSPGSSSSAFQVSSKHDGHPWYSWGTLDIMLLLLATNMKKASVGANQLPPGPPGWPVFGNIFDLGAMPHISLSSLSKKYGPVVWLRLGTVNTMLLSSAEAATEMFKNHDLTFSGRNISEAMRACSYNQGSMALGQHGPYWRMLRRICTTELFTNNRINETEQLRTKCIDNMLRWMWDESKKTGSIELAWFVSLMSFNVVGNVMLSEDLVDPQSKEGDEFFKSISRTIEWGGKPNVADFFPFLQWLDPQRIKKNMTRDMGHSLDFASRFVKQRILDRQSKKNSTKVDFLDVMLDFQGNQKDGEPADISEKNINIMILELFTASTDTTTSTIEWAMTELLRNPGVMKKVQEELHQVVGQNKCIEESK…
Coptis_chinensis|Cch00029940-PA		MEVVSIAIVSFSFLLFLFFILRDPRQKNLPPGPRPSPIVGNLLQLGDKPHAEFAKLAQKYGQLFSLKLGSQTVVVASSPAAAAEVLKTHDKILSGRYVFQSFRVKEHIENSIVWSECNDNWKLLRKVCRTELFTPKMIESQSEIREGKAREMVKFLRSKEGEVVKIVEVVFGTLVNIFGNLIFSKDVFDLEDPTGGSVELKEHLWKLLEMGNSTNPADYFPIMGKYDLFGQRRAVAEVLQQIYDVWGINLKERRGMKGSESNNDFVDVLLNAGLEDQKINALLMELFGAGTETSASTIEWAITELTKKPLVVSKIRLELVNVVGDNTVKESDLPHLPYLQAFVKETLRLHPPTPLLLPRRALETCTVMNYTIPKECQIMNFEWSLPQGMSTSELSMDEK…
Coptis_chinensis|Cch00029257-PA		MDYTNLLLFLSFVCLCICIVSSTATRLRRANLPPGPLPLPIFGNLFKLGSKPHRSLAELAKVHGPLMTLKLGSVTTVVVSSPTLAKDILQTHDQSFASRNIPEAVRALKHHELSMAWLPALTQWRNIRKMCNTQLFVMQRLEFSQALRRQKVEELLAYVDENCEHRRAVDIGQVAFSTVLNLISNTVFSADLTRLDSNYAQEFKALVRGVMEEAAKPNLADYFPILRSFDPQGIRRRMENYFRKLDDLFDGMIKKRLDSRQLEASPSCHDFLDTILDYKQDDFQLSDPDIKALLKDIFVAGTDTTSSTLEWAMTELLRNPNKMVKAQLELEEVFGKDKPIDESDIIGLPYLQAIVKETFRLHPPVPLLLPHKAVTNVNIGDFTVPQHTQVLINVWTIGR…
Coptis_chinensis|Cch00006576-PA		MDQMTFSTQSHLLYPLVLLLLPLLFIILRFHKSTLPANPPLPPGPKPWPIIGNILSLGMKPHISFAKLAQVHGPLITLQLGSQIMIIGSSPKAAREILKTHDRVCSARHVPHTLHTKSPESNHMSIVWASECTEKWKYLRTICRTELFSSKAIESQANLREDKLKEMVRYLGTKEGKEVNIVEVAFATIINVVSGLCFTKDFIQLDDEKEVGGMKQHIRTIMEVGSAPNFEDYFPILNGLDVQGLHKKFLECVRSMFASWDVLIKERKEAENSEKSTPRDVLDVLLANRFSNDEINHFIFDLFVAGSDSTSSTVEWLMAELMKNPEVMGRVREELAREINSAFVRDSDLPRLSYLNACVKETWRLHPPASLVPHRALETCKIMNYTIPKGSHVCVNLWA…
Kingdonia_uniflora|KingUnif08582.1		MEFSTVLWWFPFVCTSLLILVSIVREKLGTSLSKLPPGPVPLPIFGSLFKLGKKPHESLAKLAKTHGPLMSLKLGTLTTIVVTSSSMAKQVLQKHDQSFAGRTIPDCLRTEKNHHEFAMVWLQPYSQWRILRKISNSEIFHSSRLNANQDIRHKKVRELMEHVNEKCVSGGAVSIGEAAFVTVLNFLSNTMFSVDLGHLDSVSSQEFKAIVWGIMEEAGRPNLADFFPVLMHIDPQGVRRRMTNYFAKLDDIFDRIIDERLQSKETQTTPDVLDKLLEYSLESNPEIRRPHINALLKDIFVAGTDTTSSTLEWAMTELIRNHEIMEKARLELQQTIEKDKVVEESDIAQLPYLQAIVKETLRLHPPVPLLLPHRAETEVELCGFTVPKHTQVLVNAWAI…
Kingdonia_uniflora|KingUnif25593.1		MEFSTVLSWFTFVCTSLLILFSIVREKFNSSLSKLPPGPVPLPIFGSLFKLGKKPHESLANLAKTHGPLMSLKLGTVTTIVVTSSSMAKLVLQKHDQSFAGRSIPNSIQTRQNHHELSMVWLHPNSQWRIFRKICNSEIFHSSRLDANQDIRHKKVRELMEHVNEKCVSGGAVSIGEAAFVTVLNFLSNTMFSVDLAHLDSASSQEFKAIVCGILEEAGRPNIADFFPVLRHIDPQRVRHRVTNYFAKLDEIFDRIIDKRLQSKETQTTPDVLDKLLEYSQENNPEIRRPHINALLKDIFIAGTDTTSSTLEWALTELIRNQEIMEKARLEIQQIIEKAKPVEEQDIAQLPYLQAIVKETLRLHPPVPLLLHRAETEVELCGFTVPKHTQVLVNAWAIG…
Kingdonia_uniflora|KingUnif37174.1		MDQVQTFLFFAALLLPLFFLIIKLTKSQFQQHTLLPPGPKPWPIIGNIHQLGKKPHAYLAHLAQLHGPLISVWFGPQLIVMGSSSAAAIEILKTYDRTLSARLVPYALHTKQPELNKLSVVWASECTDEWRNLRTICRTELFTGKAIESQATLRENKVKELMEFLRTKEGNTVKVGEVVFITIVNTLSTLFFSKDFISLEDDGIGGDVKENIRRISEIGSTPNLADYYSILGGLDLQGLNKNLTECVRRLFASWELLIKERRESKRRTTRDFLDVLLSNGFNDEQINYFIFDLFVAGTDTSTSTIEWAVAELIKNQEIMDKVSEELANEIKGNILQESELPRLHYLNACVKETLRLHCPIPIAPHRAMEKCSLMGYTIPKGTPVWMNLWAIGRDPTSWK…
Kingdonia_uniflora|KingUnif34864.1		MEEIMDKVESVRNVLFFIALLLPLLVLIFMHIKFKSQKHLLLPPGPKPWPIIGNFLQLGKNIHASLAHLAQVHGPLISLRLGSQLLVVGSSPAAGTEILKTHDRILSSRLIPHAFHAKQHEYNKLSFVWASKCTDEWRNLRIICRTNLFSTKMIDSQAALRENKVKELMEFLRTNEGKVVKIGELVFITIVNTLSTLFFSKDFISLEDEGVGGEVKDNIRRISEVGSTPNLADYYSILSGLDLQGLTKNMMVCVRKLFVSWDALIKERRKSKRPTPSTNGDFLDVLLSNAFIDEQINHLIFDLFAAGADTSTSTIEWAMAELIKNREIMGKVSEELTNEIKSNIVKESELSHLSYLNVCVKETLRLHCPIPVVLRRATETCNLMGYTIPKDTQVWVNLW…
[truncated: 1,781 more rows]

## Sheet: Supplementary Table 9
Supplementary Table 9. The homologous gene sequences of characterized CYP82 genes in 245 species.
gene id	rename	sequence
[truncated: 2,890 more rows]
